# Supplementary material for: Genomic investigations of unexplained acute hepatitis in children
Source: Nature. 2023 Mar 30;617(7961):564–73. doi: 10.1038/s41586-023-06003-w (PMC10170458; doi:10.1038/s41586-023-06003-w)
Supplement: Supplementary file 3 — Clinical details of cases. 12 transplanted cases, 26 non-transplanted. Median age of cases where exact age is known is 3 years, with range 1.5-9. Case 10 was 9 years old. All other cases were aged 7 or under. Of 22 cases where the gender is known, 12 cases were female and 10 were male. Where known, all cases were of white ethnicity other than two. [file 41586_2023_6003_MOESM3_ESM.xlsx]

## Sheet: Sheet1
Case ID	Source	BMI	Symptoms	On examination	Presenting white blood count (WBC)	Presenting serum bilirubin (SBR)	Peak serum bilirubin (SBR)	Aspartate aminotransferase (AST)	Presenting alanine transaminase (ALT)	Peak alanine transaminase (ALT)	Gamma glutamyl transferase (GGT)	Albumin	Presenting prothrombin	Peak prothrombin	C-reactive protein (CRP)	Autoantibody titre	Immunoglobulin G (IgG, g/L)	Atherogenic index of plasma (AIP)	Wilson and other	Ferritin	Hepatitis A/B/C/E	EBV	CMV	Adenovirus throat	Adenovirus stool	Adenovirus blood	SARS-CoV-2 antibodies	SARS-CoV-2 PCR	HHV6	HHV7	HHV8	HSV1&2	Parvovirus	Leptospira	Rubella	Anti-streptolysin (O)	Enterovirus	Other viruses	Ultrasound scan	Outcome	Transplant	Cidofovir given	Drugs	Treatment given including antibiotics	Days from gastrointestinal symptoms to transplant	Number of HLA alleles DRB1*04:01	Number of HLA alleles DQA1*03:03	Number of HLA alleles DQB1*03:01	SARS-CoV-2 infection referring lab
1	BCH	NA	Jaundice, vomiting, diarrhoea, pale stools	Jaundice	10	126	293	NA	2700	3564	126	36	16	36	NA	NA	11.6	NA	NA	594	Negative	Negative	Negative	NA	Negative	7908 copies/ml	Negative	Positive	Negative	Negative	NA	Negative	NA	Negative	NA	NA	Negative	NA	Hepatamegaly, gall bladder thickening	Transplant - well on follow-up	Yes	2 doses after transplant	Usual immunosuppressive regime - Interleukin-2 receptor antagonist at induction, long term Tacrolimus and Azathioprine	NA	12	1	2	2	NA
2	BCH	NA	Jaundice, vomiting, diarrhoea, pale stools	Hepatomegaly, jaundice	NA	127	195	7510	2555	2927	59	31	15	45	NA	NA	NA	NA	Ceruloplasmin 0.28,AIAT neg	NA	Negative	Negative	Negative	Positive	NA	29594 copies/ml	NA	Positive	Positive	NA	NA	NA	NA	NA	NA	NA	NA	NA	Hepatomegaly, heterogenous liver, thick gall bladder wall, splenomegaly and ascites	Transplant - well on follow-up	Yes	1 dose after transplant	Usual immunosuppressive regime - Interleukin-2 receptor antagonist at induction, long term Tacrolimus and Azathioprine	NA	8	1	0	0	NA
3	BCH	NA	Jaundice, vomiting, diarrhoea, fever	NA	10.6	118	217	4750	1798	2819	165	34	17.3	55	NA	ANA 1:80	NA	NA	Ceruloplasmin 0.32,coeliac neg	4605	Negative	Negative	Negative	Positive	Positive	11951 copies/ml	NA	Positive	Positive	Negative	NA	NA	NA	NA	NA	NA	NA	NA	Heterogenous liver, thick walled gall bladder, small amount of free fluid	Transplant - well on follow-up	Yes	1 dose before transplant	Usual immunosuppressive regime - Interleukin-2 receptor antagonist at induction, long term Tacrolimus and Azathioprine	NA	42	2	1	1	NA
4	BCH/UKHSA	NA	Jaundice, vomiting	Normal	11.9	151	286	4511	4800	4742	119	36	15.3	37	NA	Negative	10.8	NA	NA	233	Negative	Negative	Negative	NA	Negative	29741 copies/ml	NA	Negative	Positive	Negative	NA	NA	NA	NA	Positive	NA	NA	Measles	Liver satisfactory, gall bladder thick walled	Transplant - well on follow-up	Yes	1 dose after transplant	Dulavit, Usual immunosuppressive regime - Interleukin-2 receptor antagonist at induction, long term Tacrolimus and Azathioprine	Meropenem,Metronidazole,Cotrimoxazole, Nystatin	14	0	1	1	Negative
5	BCH	NA	Jaundice, vomiting, diarrhoea, coryza	NA	6.8	124	251	3637	3014	3576	NA	30	20	47	NA	Negative	15.5	NA	normal ceruloplasmin	NA	Negative	Negative	Negative	NA	NA	25419 copies/ml	Positive	Negative	Negative	NA	NA	NA	NA	NA	NA	NA	NA	RSV and influenza A/B negative	Gall bladder thickening	Transplant - biliary complication on follow-up	Yes	3 dose after transplany	Usual immunosuppressive regime - Interleukin-2 receptor antagonist at induction, long term Tacrolimus and Azathioprine	NA	42	2	2	1	NA
6	UKHSA	NA	Jaundice, abdo pain, vomiting, respiratory symptoms, pale stool, history of cough and coryza, dark urine	Fever, runny nose,jaundice, vomiting/nausea	11.42	NA	181	4197	3776	3776	348	NA	15.1	NA	9	NA	NA	NA	NA	NA	Negative/not tested	Negative	Negative	Positive	Not tested	Positive	Positive	Negative	NA	NA	NA	NA	NA	NA	NA	NA	NA	NA	NA	Discharged	No	NA	None	None	NA	NA	NA	NA	Negative
7	UKHSA	NA	NA	NA	NA	NA	NA	NA	NA	NA	NA	NA	NA	NA	NA	NA	NA	NA	NA	NA	NA	NA	NA	NA	NA	NA	NA	NA	NA	NA	NA	NA	NA	NA	NA	NA	NA	NA	NA	NA	No	NA	NA	NA	NA	NA	NA	NA	NA
8	UKHSA	NA	Jaundice, abdo pain, diarrhoea, vomiting, lethargy/malaise, fever, pale stool. conjunctivitis, nausea	Fever, cough, runny nose, vomiting/nausea, diarrhoea	11.7	NA	NA	2900	1187	1900	NA	NA	NA	NA	3	NA	NA	NA	NA	NA	Negative	Negative	Negative	Not done	Not done	Positive	Positive	Positive	Pending	Negative	NA	NA	NA	NA	NA	NA	Negative	NA	NA	Discharged	No	NA	AN	NA	NA	NA	NA	NA	Positive
9	UKHSA	NA	NA	NA	NA	NA	NA	NA	NA	NA	NA	NA	NA	NA	NA	NA	NA	NA	NA	NA	NA	NA	NA	NA	NA	NA	NA	NA	NA	NA	NA	NA	NA	NA	NA	NA	NA	NA	NA	NA	No	NA	NA	NA	NA	NA	NA	NA	Negative
10	UKHSA	NA	Abdo pain, vomiting, fever, nausea	Fever, confusion, seizures, abdominal pain, vomiting/nausea,Diarrhoea	2.3	NA	14	612	403	612	NA	NA	12.9	NA	2.5	NA	NA	NA	NA	NA	Negative	Negative	Negative	Negative	Negative	Negative	Not tested	Negative	Positive	Negative	NA	Not tested	Negative	Not tested	Not tested	NA	Not tested	NA	NA	NA	No	NA	Paracetamol, Aciclover, ceftriaxone,Dexamethasone,Levetiracetam(Deppra. Sodium chloride,Ketamine, Propofol, Fentanyl, Rocuronium	Not stated	NA	NA	NA	NA	Negative
11	GRI	NA	NA	NA	NA	NA	NA	NA	NA	NA	NA	NA	NA	NA	NA	NA	NA	NA	NA	NA	NA	NA	NA	NA	NA	NA	NA	NA	NA	NA	NA	NA	NA	NA	NA	NA	NA	NA	NA	NA	No	NA	NA	NA	NA	NA	NA	NA	NA
12	UKHSA	NA	NA	NA	NA	NA	NA	NA	NA	NA	NA	NA	NA	NA	NA	NA	NA	NA	NA	NA	NA	NA	NA	NA	NA	NA	NA	NA	NA	NA	NA	NA	NA	NA	NA	NA	NA	NA	NA	NA	No	NA	NA	NA	NA	NA	NA	NA	Negative
13	GRI	NA	NA	NA	NA	NA	NA	NA	NA	NA	NA	NA	NA	NA	NA	NA	NA	NA	NA	NA	NA	NA	NA	NA	NA	NA	NA	NA	NA	NA	NA	NA	NA	NA	NA	NA	NA	NA	NA	NA	No	NA	NA	NA	NA	NA	NA	NA	NA
14	GRI	NA	NA	NA	NA	NA	NA	NA	NA	NA	NA	NA	NA	NA	NA	NA	NA	NA	NA	NA	NA	NA	NA	NA	NA	NA	NA	NA	NA	NA	NA	NA	NA	NA	NA	NA	NA	NA	NA	NA	No	NA	NA	NA	NA	NA	NA	NA	NA
15	GRI	NA	NA	NA	NA	NA	NA	NA	NA	NA	NA	NA	NA	NA	NA	NA	NA	NA	NA	NA	NA	NA	NA	NA	NA	NA	NA	NA	NA	NA	NA	NA	NA	NA	NA	NA	NA	NA	NA	NA	No	NA	NA	NA	NA	NA	NA	NA	NA
16	GRI	NA	NA	NA	NA	NA	NA	NA	NA	NA	NA	NA	NA	NA	NA	NA	NA	NA	NA	NA	NA	NA	NA	NA	NA	NA	NA	NA	NA	NA	NA	NA	NA	NA	NA	NA	NA	NA	NA	NA	No	NA	NA	NA	NA	NA	NA	NA	NA
17	UKHSA	NA	NA	NA	NA	NA	NA	NA	NA	NA	NA	NA	NA	NA	NA	NA	NA	NA	NA	NA	NA	NA	NA	NA	NA	NA	NA	NA	NA	NA	NA	NA	NA	NA	NA	NA	NA	NA	NA	NA	No	NA	NA	NA	NA	NA	NA	NA	Negative
18	UKHSA	NA	Jaundice, abdo pain, vomiting, lethargy/malaise, pale stool, loss of appetite, nausea	Fever, fatigue/malaise, jaundice, abdominal pain	12.7	NA	114	2326	1166	1245	NA	NA	11	NA	2	NA	NA	NA	NA	NA	NA	Negative	Negative	Not done	Not done	Positive	Positive	NA	Negative	Positive	NA	NA	NA	NA	NA	NA	NA	NA	NA	Discharged	No	NA	NA	NA	NA	NA	NA	NA	Negative
19	UKHSA	NA	NA	NA	NA	NA	NA	NA	NA	NA	NA	NA	NA	NA	NA	NA	NA	NA	NA	NA	NA	NA	NA	NA	NA	NA	NA	NA	NA	NA	NA	NA	NA	NA	NA	NA	NA	NA	NA	NA	No	NA	NA	NA	NA	NA	NA	NA	Negative
20	UKHSA	NA	Jaundice, abdo pain, lethargy/malaise, pale stool, constipation, dark urine	Jaundice	NA	NA	109	3368	NA	3980	NA	NA	NA	NA	NA	NA	NA	NA	NA	NA	Negative/not tested		Negative	NA	Positive	Positive	NA	Negative	NA	NA	NA	NA	NA	NA	NA	NA	Negative	NA	NA	NA	No	NA	NA	NA	NA	NA	NA	NA	Negative
21	PHW	NA	Jaundice, abdominal pain, diarrhoea, vomiting, respiratory illness, lethargy, pale stool	croup, abdominal pain	NA	NA	154	1256	NA	1983	NA	NA	NA	15.9	NA	NA	NA	NA	NA	NA	negative	negative	negative	positive	not tested	negative	negative	negative	negative	not tested		not tested	negative	negative	negative	NA	positive	none	Abdo u/s scan 01/04 repeat 07/04 gallbladder wall thickened and oedematous. Exo bright structures largest 3mm no shadowing may represent calculi	Recovered	No	NA	NA	NA	NA	NA	NA	NA	NA
22	GRI	NA	NA	NA	NA	NA	NA	NA	NA	NA	NA	NA	NA	NA	NA	NA	NA	NA	NA	NA	NA	NA	NA	NA	NA	NA	NA	NA	NA	NA	NA	NA	NA	NA	NA	NA	NA	NA	NA	NA	No	NA	NA	NA	NA	NA	NA	NA	NA
23	GRI	NA	NA	NA	NA	NA	NA	NA	NA	NA	NA	NA	NA	NA	NA	NA	NA	NA	NA	NA	NA	NA	NA	NA	NA	NA	NA	NA	NA	NA	NA	NA	NA	NA	NA	NA	NA	NA	NA	NA	No	NA	NA	NA	NA	NA	NA	NA	NA
24	GRI	NA	NA	NA	NA	NA	NA	NA	NA	NA	NA	NA	NA	NA	NA	NA	NA	NA	NA	NA	NA	NA	NA	NA	NA	NA	NA	NA	NA	NA	NA	NA	NA	NA	NA	NA	NA	NA	NA	NA	No	NA	NA	NA	NA	NA	NA	NA	NA
25	NHSL	NA	NA	NA	NA	NA	NA	NA	NA	NA	NA	NA	NA	NA	NA	NA	NA	NA	NA	NA	NA	NA	NA	NA	NA	NA	NA	NA	NA	NA	NA	NA	NA	NA	NA	NA	NA	NA	NA	NA	No	NA	NA	NA	NA	NA	NA	NA	NA
26	NHSL	NA	NA	NA	NA	NA	NA	NA	NA	NA	NA	NA	NA	NA	NA	NA	NA	NA	NA	NA	NA	NA	NA	NA	NA	NA	NA	NA	NA	NA	NA	NA	NA	NA	NA	NA	NA	NA	NA	NA	No	NA	NA	NA	NA	NA	NA	NA	NA
27	UKHSA	NA	Jaundice, diarrhoea, vomiting, lethargy/malaise, pale stool	Jaundice, abdominal pain, vomiting/nausea, Diarrhoea	6.4	NA	298	5111	1960	5111	158	NA	27	NA	4	NA	NA	NA	NA	NA	Negative/not tested	Negative	Negative	Not tested	Not tested	Positive	Not tested	Negative	Not tested	Not tested	NA	Negative	Negative	Not tested	Not tested	NA	Not tested	Grandular fever	NA	Discharged	No	NA	Vitamin K; Fluconazole & co-amoxiclav	Co-amoxiclav, Fluconazole	NA	NA	NA	NA	Negative
28	KCH	NA	Jaundice, loose stools	Transfer intubated, jaundice, hepatomegaly	7.5	293	368	8436	4263	4263	103	32	13.8	13.8	14	Negative	13.96	301	Excluded	517	Negative	1387IU/ml Log 3.1	Negative	Negative	Negative	318200 copies/ml	Positive	Negative	NA	NA	NA	Negative	Negative	Negative	Negative	NA	Positive	Rhinovirus positive	US Liver : There is hepatomegaly. The major vessels are patent with reduced antegrade flow of 8cm/sec in the portal vein, a hyperdynamic hepatic artery and triphasic HV waveform. Thick walled oedematous gallbladder as seen with liver congestion. The spleen measures 8.8cm and there is a moderate degree of ascites in the pelvis and several small pockets of loculated ( likely longstanding) ascites i…	Transplant	Yes	NA	None	NA	16	1	1	1	NA
29	KCH	NA	Jaundice, lethargy, vomiting	Jaundice, lethargy, hepatosplenomegaly	10	162	294	6290	4450	5417	99	31	18.8	29.3	9	ANA + 1/10	19.76	544	Excluded	1750	Negative	Negative	Negative	Negative	NA	20293 copies/ml log 4.3	Negative	Negative	Low-level positive	Low-level positive	Negative	Negative	Negative	Negative	Negative	NA	Positive	NA	The liver parenchyma is homogeneous throughout and of normal reflectivity. There is no duct dilatation and the gallbladder is normal in shape and size with a thickened wall. The portal vein is patent with normal velocity antegrade flow. The spleen is slightly enlarged with a length of 9.1 cm. There is no free fluid.	Transplant	Yes	Cidofovir given	None	NA	21	NA	NA	NA	NA
30	KCH	14.4	Vomiting, jaundice, abdominal pain	Jaundice, hepatosplenomegaly	12.2	123	123	3507	5719	5719	250	41	16.2	16.2	7	LKM weak positive	12.77	273	A1AT PiZ	NA	Negative	Negative	Negative	Positive	NA	82358 copies/ml log 4.9	NA	Negative	Positive	Low-level positive	Negative	Negative	NA	NA	NA	Negative	NA	NA	A limited scan due to a distressed child. The liver parenchyma is finely heterogenous. There is no duct dilatation and the gallbladder is normal in shape and size. The portal vein is patent with normal velocity antegrade flow. The spleen is enlarged with a length of 9.9 cm.	Discharged post biopsy with no intervention	No	NA	None	NA	NA	1	1	0	NA
31	KCH	NA	Vomiting, jaundice, lethargy	Jaundice, lethargic, hepatosplenomegaly	9.6	49	410	5985	2664	3877	195	37	15.9	15.9	5	SMA 1/40	14.74	537	Excluded	3156	Negative	1424 IU/Ml log 3.2	Negative	Positive	Negative	106927 copies/ml log 5.0	Positive	Negative	Positive	Low-level positive	Negative	Negative	Negative	NA	Negative	NA	Negative	NA	The liver parenchyma is homogeneous throughout and of slight increased reflectivity in keeping with fatty change. There is no duct dilatation and the gallbladder is normal in shape and size and predictably thick walled. The portal vein is patent with normal velocity antegrade flow. The spleen is slightly enlarged.	Transplant	Yes	Cidofovir given	None	NA	17	1	1	0	NA
32	KCH	12	Jaundice, vomiting, diarrhoea	Hepatomegaly, distended tender abdomen	8.1	120	389	4199	4847	4374	79	38	14.5	21.4	3	Negative	20.75	466	Excluded	1166	Negative	Negative	Negative	Negative	Negative	234308 copies/ml	Indeterminate	Negative	Negative	Negative	Negative	Negative	Negative	NA	Negative	Negative	Negative	NA	The liver parenchyma is finely heterogenous ('Starry Sky' reflectivity). No focal lesions seen. The bile ducts are non-dilated. The gallbladder is normal in shape with a normal wall thickness. No gallstones are seen. The portal vein is pulsatile with antegrade flow (PSV = 15.4 cm/s). Hepatic artery is patent with a resistive index of 0.7 and PSV 35 cm/s. The hepatic veins are patent with triphasi…	Transplant	Yes	Cidofovir given	Salbutamol inhaler	NA	20	NA	NA	NA	NA
33	KCH	NA	Diarrhoea, vomitting, jaundice	Jaundice, hepatomegaly	NA	NA	235	3173	NA	2019	55	30	13.9	13.9	5	Negative	12.86	499	Excluded	493	Negative	Negative	Negative	Negative	Negative	164732 copies/ml log 5.2	Positive	Negative	Negative	Low-level positive	Negative	Negative	Negative	Negative	Negative	Negative	Negative	RSV positive	The liver is enlarged with a starry sky appearance in keeping with oedema. There is no duct dilatation and the gallbladder is predictably thick walled and contracted. The portal vein is patent with normal velocity antegrade flow. The spleen is enlarged with a length of 8.3 cm. There is no hydronephrosis. There is a shascites.	Transplant	Yes	Cidofovir given	Cefalexin	NA	Approx 35	1	1	1	NA
34	KCH	15.9	Jaundice, cough, coryzal, diarrhoea, vomiting	Hepatomegaly, irritable	8.63	182	347	4175	2579	4243	99	32	NA	13.5	5	Negative	11.75	481	Excluded	NA	Negative	108 IU/ml log 2.0	Negative	Negative	Negative	69561 copies/ml	Positive	Negative	Low-level positive	Low-level positive	Negative	Negative	NA	NA	Negative	Negative	NA	NA	The liver parenchyma is homogeneous throughout and of slightly decreased reflectivity in keeping with acute hepatitis. There is no duct dilatation. The gallbladder is normal in shape and size (contracted) and it has an oedematous wall. The portal and para-umbilical veins are patent. The spleen is enlarged with a length of 10.4 cm. There is a small quantity of free fluid lying mainly in the pelvis.	Transplant	Yes	Cidofovir given	Nil drug hx	NA	20	1	1	1	NA
35	KCH	NA	Jaundice, lethargy, vomitting, diarrhoea	hepatomgealy, lethargic, irritable	7.9	95	249	6248	3655	4518	141	37	13.6	13.6	7	ANA 1/40	10.12	546	Excluded	2807	Negative	Negative	Negative	Negative	Negative	57456 copies/ml	Positive	Negtaive	Low-level positive	Low-level positive	Negative	Negative	Negative	Negative	Negative	Negative	Negative	NA	The liver parenchyma is homogeneous throughout and moderately fatty. There is no duct dilatation and the gallbladder is normal in shape and size (contracted despite fasting). The portal vein is patent with normal velocity antegrade flow. The spleen is normal in size with a length of 7 cm (7.3 cm lat scan). There is no free fluid.	Recovered and transferred back to local	No	Cidofovir given	Nil drug hx	NA	NA	1	0	0	NA
36	KCH	NA	Jaundice, abdo pain, vomiting, cough	Jaundice	5.8	112	250	4702	2709	3901	152	39	15.2	15.2	6	Negative	14.97	432	Excluded	94	Negative	Negative	Negative	Negative	Negative	216039 copies/ml	Positive	Negative	NA	NA	NA	NA	Negative	NA	Negative	NA	NA	NA	A limited scan due to a distressed child. The liver parenchyma is of increased reflectivity in keeping with moderate fatty change. No focal abnormality was seen. There is no duct dilatation. The gallbladder is thick walled, however no obvious evidence of calculi. The portal vein is patent with normal velocity antegrade flow. The spleen is normal in size with a length of 8.8cm.	Transplant	Yes	Cidofovir given	Nil drug hx	NA	22	1	1	1	NA
37	KCH	NA	Jaundice, diarrhoea, vomiting	Hepatomegaly, irritable	9.2	184	307	4772	4115	4115	151	35	NA	NA	7	ANA 1/10	14.4	298	Excluded	596	Negative	Negative	Negative	Negative	Negative	504635 copies/ml	Negative	Negative	Low-level positive	NA	Negative	Negative	NA	NA	Negative	Negative	NA	NA	The liver is enlarged and mildly fatty. The parenchyma is homogenous. The portal vein is patent with normal velocity antegrade flow. The gallbladder is contracted with a thickened wall. No pericolic fluid vollections. There is no duct dilatation. The spleen is enlarged with a length of 10.2 cm. No free fluid in the abdomen or pelvis.	Recovered and transferred back to local	No	Cidofovir given	Paracetamol	NA	NA	1	1	1	NA
38	KCH	15	Jaundice, coyrzal, diarrhoea	Blanching macular rash in the lower limbs and chest	17.8	96	207	3722	2652	3345	79	37	NA	NA	4	Negative	19.07	1200	Excluded	523	Negative	Negative	Negative	Negative	Negative	84737 copies/ml	Positive	Negative	NA	NA	Negative	Negative	Negative	NA	Negative	Negative	Negative	NA	The liver is enlarged and of increased reflectivity throughout with periportal oedema. No focal lesions seen. There is no duct dilatation and the gallbladder is predictably thick walled and contains inspissated bile. The portal vein is patent with normal velocity antegrade flow. The spleen is enlarged with a length of 8.6 cm. There is no hydronephrosis. No free fluid in the abdomen and pelvis.	Transplant list deactivated with improvement of synethetic function	No	Cidofovir given	Nil drug hx	NA	NA	NA	NA	NA	NA
[truncated: 3 more columns]
