# Supplementary material for: Genomic investigations of unexplained acute hepatitis in children
Source: Nature. 2023 Mar 30;617(7961):564–73. doi: 10.1038/s41586-023-06003-w (PMC10170458; doi:10.1038/s41586-023-06003-w)
Supplement: Supplementary file 4 — Metagenomics summary statistics: raw read counts, human filtered and other findings. F: sequencing failed. [file 41586_2023_6003_MOESM4_ESM.xlsx]

## Sheet: Sheet1
Case	Specimen	RNA			DNA
		Raw reads	Human filtered	Other mNGS results	Raw reads	Human filtered	Other mNGS results
Liver
1	JBL1	57400446	895604	-	32273777	1250914	Astrovirus VA3, TTV
2	JBL4	63430844	1028780	-	49625805	2584180	-
3	JBL3	63430844	1093392	-	44881648	1542178	TTV
4	JBL2	66916975	879266	-	49660375	1611202	-
5	JBL5	F	F	-	86643490	TBC	-
Blood
6	JBB14	13615796	89174	-	24110121	318254	TTV
6	JBB16	11394711	67128	-	56728541	794514	TTV
7	JBB10	F	F	F	38172955	357120	EBV
8	JBPL1	21053703	117728	TTV	21131740	293772	TTV
9	JBB1	50388499	357810	-	46101012	482796	TTV
10	JBB15	F	F	F	44186067	459964	-
