# Supplementary material for: Genomic investigations of unexplained acute hepatitis in children
Source: Nature. 2023 Mar 30;617(7961):564–73. doi: 10.1038/s41586-023-06003-w (PMC10170458; doi:10.1038/s41586-023-06003-w)
Supplement: Supplementary file 5 — Nanopore sequencing. All four samples were sequenced to a lower depth. Case 3 and 5 underwent a second round of deeper sequencing. N50s across all sequencing runs were similar. [file 41586_2023_6003_MOESM5_ESM.xlsx]

## Sheet: Sheet1
Case ID	Sequencing depth	Estimated bases (Gb)	Data produced (TB)	Reads generated (M)	Estimated N50 (kb)	Bases called pass (Gb)	Bases called fail (Gb)	AAV2 reads	AAV2 bases (kb)	AAV2 N50 (kb)	Number of AAV2 reads with evidence of complex structures	Number of AAV2 reads that show no evidence of complex structures	Percentage of complex reads
1	Lower	91.69	0.75	13.37	9.1	82.2	9.96	16	47.44	8.71	7	9	43.8
2	Lower	92.33	0.77	15.19	8.16	79.18	11.83	9	31.59	4.24	7	2	77.8
3	Higher	405.95	3.71	121.83	4.4	234.79	44.7	52	150.11	7.65	25	27	48.1
3	Lower	43.22	0.36	5.75	9.19	37.43	5.73	16	48.24	6.43	10	6	62.5
5	Higher	386.84	3.41	82.92	8.52	336.65	42.57	178	435.41	8.68	75	103	42.1
5	Lower	112.62	0.97	22.24	7.04	94.08	16.52	6	15.88	10.65	5	1	83.3
