# Supplementary material for: Genomic investigations of unexplained acute hepatitis in children
Source: Nature. 2023 Mar 30;617(7961):564–73. doi: 10.1038/s41586-023-06003-w (PMC10170458; doi:10.1038/s41586-023-06003-w)
Supplement: Supplementary file 6 — Clinical details for PERFORM/DIAMONDS immunocompetent controls and microbiological testing by referring laboratory for DIAMONDS controls. P: positive, N: negative, IC: inconclusive, VL: viral load. [file 41586_2023_6003_MOESM6_ESM.xlsx]

## Sheet: sup_tab_4_updated
ID	Category	Adenovirus in blood	Date of sample	Age	Syndrome	Max ALT	Consortium	SARS-CoV-2 IgG	SARS-CoV-2 IgM	HAdV VL	CMV VL	EBV VL	HHV6a VL	HHV6b VL	HHV7 VL	Influenza A	Influenza A H1	Influenza A H3	Influenza B	RSV A	RSV B	Parainfluenza 1	Parainfluenza 2	Parainfluenza 3	Parainfluenza 4	Coronavirus 229E	Coronavirus NL63	Coronavirus OC43	Coronavirus HKU1	Metapneumovirus	Adenovirus Resp	Bocavirus	C pneumoniae	L pneumophila	M pneumoniae	Rhinovirus	Enterovirus Resp	Adenovirus Bld	Parvovirus	Enterovirus Bld	Parechovirus	N meningitidis	S pneumoniae	H influenzae	S aureus	Group A Strep	Group B Strep	A baumanii	P aeruginosa
DIS-1123-1090-E01	Critical Illness with raised ALT	-	2021-01-06	5.2	COVID-RELATED INFLAMMATION; COVID19; ASYHMA EXACERBATION	387	DIAMONDS	P	P	0	0	64.6	0	0	0	-	-	-	-	-	-	-	-	-	-	-	-	-	-	-	-	-	-	-	-	-	-	-	-	-	-	-	-	-	-	-	-	-	-
DIS-1101-1130-E01	Adenovirus with normal ALT	-	2020-07-04	1.4	BRONCHIOLITIS;UNDEFINED LRTI	30	DIAMONDS	N	N	0	0	0	0	6600	0	-	-	-	-	-	-	-	-	-	-	-	-	-	-	-	-	-	-	-	-	-	-	-	-	-	-	-	-	-	-	-	-	-	-
DIS-1101-1183-E01	Adenovirus with normal ALT	-	2020-08-19	1	FEVER WITHOUT SOURCE	13	DIAMONDS	N	N	32400	0	0	0	0	0	-	-	-	-	-	-	-	-	-	-	-	-	-	-	-	-	-	-	-	-	-	-	-	-	-	-	-	-	-	-	-	-	-	-
DIS-1101-1197-E01	Other hepatitis	-	2020-09-09	6.7	HEPATITIS A	1656	DIAMONDS	P	IC	0	0	0	0	113	0	-	-	-	-	-	-	-	-	-	-	-	-	-	-	-	-	-	-	-	-	-	-	-	-	-	-	-	-	-	-	-	-	-	-
DIS-1101-1224-E01	Adenovirus with normal ALT	-	2020-10-18	1.6	FEVER WITHOUT SOURCE	16	DIAMONDS	IC	N	0	0	0	0	549	0	-	-	-	-	-	-	-	-	-	-	-	-	-	-	-	-	-	-	-	-	-	-	-	-	-	-	-	-	-	-	-	-	-	-
DIS-1101-1278-E01	Adenovirus with raised ALT	-	2020-12-26	4.1	LYMPHADENTITIS; BACTERAEMIA;SEPTIC SHOCK;TOXIC SHOCK SYNDROME	133	DIAMONDS	N	N	0	0	0	0	40.2	0	-	-	-	-	-	-	-	-	-	-	-	-	-	-	-	-	-	-	-	-	-	-	-	-	-	-	-	-	-	-	-	-	-	-
DIS-1101-1322-E01	Adenovirus with normal ALT	-	2021-02-04	1.1	URTI NON-SPECIFIC	17	DIAMONDS	N	N	0	0	0	0	3260	0	-	-	-	-	-	-	-	-	-	-	-	-	-	-	-	-	-	-	-	-	-	-	-	-	-	-	-	-	-	-	-	-	-	-
DIS-1101-1450-E01	Adenovirus with normal ALT	-	2021-06-03	3.3	TONSILITIS;URTI NON-SPECIFIC	9	DIAMONDS	N	N	-	-	-	-	-	-	-	-	-	-	-	-	-	-	-	-	-	-	-	-	-	-	-	-	-	-	-	-	-	-	-	-	-	-	-	-	-	-	-	-
DIS-1101-1539-E01	Critical Illness with raised ALT	-	2021-09-09	5.9	KAWASAKI DISEASE;COVID-RELATED INFLAMMATION	384	DIAMONDS	P	IC	-	-	-	-	-	-	-	-	-	-	-	-	-	-	-	-	-	-	-	-	-	-	-	-	-	-	-	-	-	-	-	-	-	-	-	-	-	-	-	-
DIS-1105-1063-E01	Critical Illness with raised ALT	-	2020-10-08	7.5	Acute drug-induced hepatic failure	4610	DIAMONDS	N	N	0	0	0	0	0	0	-	-	-	-	-	-	-	-	-	-	-	-	-	-	-	-	-	-	-	-	-	-	-	-	-	-	-	-	-	-	-	-	-	-
DIS-1107-1046-E01	Adenovirus with normal ALT	-	2021-03-09	0.8	MOD/SEVERE DIARRHOEA	16	DIAMONDS	-	-	-	-	-	-	-	-	-	-	-	-	-	-	-	-	-	-	-	-	-	-	-	-	-	-	-	-	-	-	-	-	-	-	-	-	-	-	-	-	-	-
DIS-1107-1084-E01	Adenovirus with normal ALT	-	2021-10-01	1.3	URTI NON-SPECIFIC	14	DIAMONDS	-	-	-	-	-	-	-	-	-	-	-	-	-	-	-	-	-	-	-	-	-	-	-	-	-	-	-	-	-	-	-	-	-	-	-	-	-	-	-	-	-	-
DIS-1116-1003-E01	Critical Illness with raised ALT	-	2020-10-16	0.4	-	6467	DIAMONDS	-	-	-	-	-	-	-	-	-	-	-	-	-	-	-	-	-	-	-	-	-	-	-	-	-	-	-	-	-	-	-	-	-	-	-	-	-	-	-	-	-	-
DIS-1116-1047-E01	Critical Illness with raised ALT	-	2021-05-06	0.2	Cardiomyopathy I42.9	840	DIAMONDS	-	-	-	-	-	-	-	-	-	-	-	-	-	-	-	-	-	-	-	-	-	-	-	-	-	-	-	-	-	-	-	-	-	-	-	-	-	-	-	-	-	-
DIS-1116-1056-E01	Non-adenovirus raised ALT	-	2021-05-16	1.3	KAWASAKI DISEASE	591	DIAMONDS	-	-	-	-	-	-	-	-	-	-	-	-	-	-	-	-	-	-	-	-	-	-	-	-	-	-	-	-	-	-	-	-	-	-	-	-	-	-	-	-	-	-
BIV-2201-1047-E1	Adenovirus with normal ALT	-	2019-11-01	3.8	VIRAL-INDUCED WHEEZE;PNEUMONIA	13	PERFORM	-	-	-	-	-	-	-	-	N	N	N	N	N	N	N	N	P	N	N	N	N	N	N	P	N	N	N	P	N	N	-	-	-	-	-	-	-	-	-	-	-	-
BIV-2201-1025-E1	Non-adenovirus raised ALT	-	2019-06-06	5.5	PNEUMONIA	684	PERFORM	-	-	-	-	-	-	-	-	N	N	N	N	N	N	N	N	N	N	N	N	N	N	N	N	N	N	N	P	N	N	-	-	-	-	-	-	-	-	-	-	-	-
BIV-2201-1004-E1	Adenovirus with normal ALT	-	2018-11-14	1.8	PHARYNGITIS	36	PERFORM	-	-	-	-	-	-	-	-	N	N	N	N	N	N	N	N	N	N	N	N	N	N	N	P	N	N	N	N	N	N	-	-	-	-	-	-	-	-	-	-	-	-
BIV-2201-1002-E1	Adenovirus with normal ALT	-	2018-11-01	4.9	TONSILITIS	10	PERFORM	-	-	-	-	-	-	-	-	N	N	N	N	N	N	N	N	N	N	N	N	N	N	N	P	N	N	N	N	N	N	-	-	-	-	-	-	-	-	-	-	-	-
BIV-1801-1397-E1	Adenovirus with normal ALT (blood)	9920	2018-05-01	2.8	LYMPHADENITIS; EBV/GRANDULAR FEVER	8.6	PERFORM	-	-	-	-	-	-	1100	1840	N	N	N	N	N	N	N	N	N	N	N	N	N	N	N	P	P	N	N	N	-	-	9920	-	-	-	-	-	-	-	-	-	-	-
BIV-1701-1236-E1	Adenovirus with normal ALT	-	2019-03-19	3.2	UNDEFINED LRTI	0.3	PERFORM	-	-	-	-	-	-	364	5150	N	N	N	N	N	N	N	N	N	N	N	N	N	N	N	P	N	N	N	N	N	N	-	-	-	-	-	-	-	-	-	-	-	-
BIV-1601-1489-E1	Other hepatitis	-	2018-11-01	7	Hepatitis A	1412	PERFORM	-	-	-	-	-	-	-	323	-	-	-	-	-	-	-	-	-	-	-	-	-	-	-	-	-	-	-	-	-	-	-	-	-	-	-	-	-	-	-	-	-	-
BIV-1601-1300-E1	Other hepatitis	-	2018-01-15	5	Hepatitis A without hepatic coma	743	PERFORM	-	-	-	1240	-	-	-	-	-	-	-	-	-	-	-	-	-	-	-	-	-	-	-	-	-	-	-	-	-	-	-	-	-	-	-	-	-	-	-	-	-	-
BIV-1601-1284-E1	Other hepatitis	-	2017-12-15	5	Hepatitis A without hepatic coma	1394	PERFORM	-	-	-	-	881	-	-	442	-	-	-	-	-	-	-	-	-	-	-	-	-	-	-	-	-	-	-	-	-	-	-	-	-	-	-	-	-	-	-	-	-	-
BIV-1401-1184-E1	Critical Illness with raised ALT	-	2018-05-18	0.7	PYELONEPHRITIS; R50.82 post operative infection	913	PERFORM	-	-	-	-	-	-	-	-	-	-	-	-	-	-	-	-	-	-	-	-	-	-	-	-	-	-	-	-	-	-	-	-	-	-	-	-	-	-	-	-	-	-
BIV-1401-1160-E1	Adenovirus with raised ALT	-	2018-03-19	1.6	FEVER WITHOUT SOURCE	1160	PERFORM	-	-	-	-	8450	-	-	-	N	N	N	N	N	N	N	N	N	N	N	N	N	N	N	N	N	N	N	N	-	-	-	-	-	-	-	-	-	-	-	-	-	-
BIV-1401-1093-E1	Critical Illness with raised ALT	-	2017-10-19	7.1	CLABSI (LINE INFECTION)	1170	PERFORM	-	-	-	-	-	-	-	-	N	N	N	N	N	N	N	N	N	N	N	N	N	N	N	N	N	N	N	N	-	-	-	-	-	-	-	-	-	28.16	-	-	-	-
BIV-1401-1013-E1	Critical Illness with raised ALT	-	2017-03-08	1.3	FEVER WITHOUT SOURCE; Cardiomyopathy	311	PERFORM	-	-	-	-	-	-	3250000	-	-	-	-	-	-	-	-	-	-	-	-	-	-	-	-	-	-	-	-	-	-	-	-	1370000	-	-	-	-	-	-	-	-	-	-
BIV-1301-1402-E1	Adenovirus with normal ALT	-	2018-07-02	2.2	TONSILITIS	18	PERFORM	-	-	-	-	-	-	-	5070	-	-	-	-	-	-	-	-	-	-	-	-	-	-	-	-	-	-	-	-	-	-	-	-	-	-	-	-	-	-	-	-	-	-
BIV-1301-1401-E1	Adenovirus with normal ALT	-	2018-07-02	2.9	TONSILITIS;URTI NON SPECIFIC	20	PERFORM	-	-	-	-	1130	-	-	1940	-	-	-	-	-	-	-	-	-	-	-	-	-	-	-	-	-	-	-	-	-	-	-	-	36.96	-	-	-	-	-	-	-	-	-
BIV-1301-1320-E2	Adenovirus with normal ALT	-	2018-07-04	2.9	TONSILITIS;URTI NON SPECIFIC	25	PERFORM	-	-	-	-	1240	-	645	-	-	-	-	-	-	-	-	-	-	-	-	-	-	-	-	-	-	-	-	-	-	-	-	-	-	-	-	-	-	-	-	-	-	-
BIV-1301-1314-E1	Adenovirus with normal ALT (blood)	1780	2018-03-12	1.5	URTI NON SPECIFIC	25	PERFORM	-	-	-	-	-	-	-	-	-	-	-	-	-	-	-	-	-	-	-	-	-	-	-	-	-	-	-	-	-	-	1780	-	-	-	-	-	-	-	-	-	-	-
BIV-1301-1175-E1	Adenovirus with normal ALT (blood)	4940	2017-06-16	0.1	URTI NON SPECIFIC	22	PERFORM	-	-	-	-	-	-	-	-	N	N	N	N	N	N	N	N	N	N	N	N	N	N	N	P	N	N	N	N	-	-	4940	-	-	-	-	-	-	-	-	-	-	-
BIV-1104-1023-E1	Non-adenovirus raised ALT	-	2017-08-29	0.1	Viral gastroenteritis	407	PERFORM	-	-	-	-	-	-	-	-	-	-	-	-	-	-	-	-	-	-	-	-	-	-	-	-	-	-	-	-	-	-	-	-	-	-	-	-	-	-	-	-	-	-
BIV-1102-1242-E01	Critical Illness with raised ALT	-	2017-11-21	5	UNDEFINED LRTI	1398	PERFORM	-	-	-	-	-	-	-	-	-	-	-	-	-	-	-	-	-	-	-	-	-	-	-	-	-	-	-	-	-	-	-	-	-	-	-	-	-	-	-	-	-	-
BIV-1101-1848-E01	Adenovirus with raised ALT	-	2019-12-03	5	TONSILITIS; ENCEPHALITIS; EBV/GRANDULAR FEVER	695	PERFORM	-	-	-	-	-	-	-	-	-	-	-	-	-	-	-	-	-	-	-	-	-	-	-	-	-	-	-	-	-	-	-	-	-	-	-	-	-	-	-	-	-	-
BIV-1101-1813-E01	Adenovirus with raised ALT	-	2019-10-07	6.5	BACTERAEMIA	225	PERFORM	-	-	-	-	-	-	-	-	-	-	-	-	-	-	-	-	-	-	-	-	-	-	-	-	-	-	-	-	-	-	-	-	-	-	-	-	-	-	-	-	-	-
BIV-1101-1806-E01	Other hepatitis	-	2019-09-26	6.4	Hepatitis A without hepatic coma	2197	PERFORM	-	-	-	-	-	-	-	-	-	-	-	-	-	-	-	-	-	-	-	-	-	-	-	-	-	-	-	-	-	-	-	-	-	-	-	-	-	-	-	-	-	-
BIV-1101-1680-E01	Adenovirus with normal ALT	-	2019-02-22	7.8	FEVER UNKNOWN ORIGIN	5	PERFORM	-	-	-	-	-	-	-	-	-	-	-	-	-	-	-	-	-	-	-	-	-	-	-	-	-	-	-	-	-	-	-	-	-	-	-	-	-	-	-	-	-	-
BIV-1101-1679-E01	Adenovirus with normal ALT	-	2019-02-22	1.4	FLU-LIKE ILLNESS	38	PERFORM	-	-	-	-	-	-	-	-	-	-	-	-	-	-	-	-	-	-	-	-	-	-	-	-	-	-	-	-	-	-	-	-	-	-	-	-	-	-	-	-	-	-
BIV-1101-1673-E01	Adenovirus with normal ALT	-	2019-02-20	7.1	URTI NON SPECIFIC	13	PERFORM	-	-	-	-	-	-	-	-	-	-	-	-	-	-	-	-	-	-	-	-	-	-	-	-	-	-	-	-	-	-	-	-	-	-	-	-	-	-	-	-	-	-
BIV-1101-1655-E01	Non-adenovirus raised ALT	-	2019-02-03	4.6	FEVER WITHOUT SOURCE	339	PERFORM	-	-	-	-	-	-	-	-	-	-	-	-	-	-	-	-	-	-	-	-	-	-	-	-	-	-	-	-	-	-	-	-	-	-	-	-	-	-	-	-	-	-
BIV-1101-1646-E01	Adenovirus with normal ALT	-	2019-01-23	2.1	Erythema Multiforme L51.9	19	PERFORM	-	-	-	-	-	-	-	-	-	-	-	-	-	-	-	-	-	-	-	-	-	-	-	-	-	-	-	-	-	-	-	-	-	-	-	-	-	-	-	-	-	-
BIV-1101-1624-E01	Critical Illness with raised ALT	-	2019-01-07	0.2	FLU-LIKE ILLNESS	768	PERFORM	-	-	-	-	-	-	-	-	-	-	-	-	-	-	-	-	-	-	-	-	-	-	-	-	-	-	-	-	-	-	-	-	-	-	-	-	-	-	-	-	-	-
BIV-1101-1586-E01	Adenovirus with normal ALT (blood)	1080	2018-11-19	1.4	PNEUMONIA	19	PERFORM	-	-	-	-	-	-	-	-	-	-	-	-	-	-	-	-	-	-	-	-	-	-	-	-	-	-	-	-	-	-	-	-	-	-	-	-	-	-	-	-	-	-
BIV-1101-1538-E01	Other hepatitis	-	2018-09-20	6.4	Hepatitis A	1352	PERFORM	-	-	-	-	-	-	-	-	-	-	-	-	-	-	-	-	-	-	-	-	-	-	-	-	-	-	-	-	-	-	-	-	-	-	-	-	-	-	-	-	-	-
BIV-1101-1524-E01	Non-adenovirus raised ALT	-	2018-09-05	1.4	Inflammatory syndrome	681	PERFORM	-	-	-	-	-	-	-	-	-	-	-	-	-	-	-	-	-	-	-	-	-	-	-	-	-	-	-	-	-	-	-	-	-	-	-	-	-	-	-	-	-	-
BIV-1101-1511-E01	Control	-	2018-08-10	4.4	-	-	PERFORM	-	-	-	-	-	-	-	-	-	-	-	-	-	-	-	-	-	-	-	-	-	-	-	-	-	-	-	-	-	-	-	-	-	-	-	-	-	-	-	-	-	-
BIV-1101-1505-E01	Control	-	2018-08-03	5.1	-	-	PERFORM	-	-	-	-	-	-	-	-	-	-	-	-	-	-	-	-	-	-	-	-	-	-	-	-	-	-	-	-	-	-	-	-	-	-	-	-	-	-	-	-	-	-
BIV-1101-1504-E01	Control	-	2018-08-03	5.8	-	-	PERFORM	-	-	-	-	-	-	-	-	-	-	-	-	-	-	-	-	-	-	-	-	-	-	-	-	-	-	-	-	-	-	-	-	-	-	-	-	-	-	-	-	-	-
BIV-1101-1492-E01	Control	-	2018-07-19	7.8	-	-	PERFORM	-	-	-	-	-	-	-	-	-	-	-	-	-	-	-	-	-	-	-	-	-	-	-	-	-	-	-	-	-	-	-	-	-	-	-	-	-	-	-	-	-	-
BIV-1101-1475-E01	Control	-	2018-06-29	3.8	-	-	PERFORM	-	-	-	-	-	-	-	-	-	-	-	-	-	-	-	-	-	-	-	-	-	-	-	-	-	-	-	-	-	-	-	-	-	-	-	-	-	-	-	-	-	-
BIV-1101-1468-E01	Adenovirus with normal ALT (blood)	5350	2018-06-19	7.6	TONSILITIS	19	PERFORM	-	-	-	-	-	-	-	-	-	-	-	-	-	-	-	-	-	-	-	-	-	-	-	-	-	-	-	-	-	-	-	-	-	-	-	-	-	-	-	-	-	-
BIV-1101-1463-E01	Control	-	2018-06-15	5.9	-	-	PERFORM	-	-	-	-	-	-	-	-	-	-	-	-	-	-	-	-	-	-	-	-	-	-	-	-	-	-	-	-	-	-	-	-	-	-	-	-	-	-	-	-	-	-
BIV-1101-1451-E01	Control	-	2018-06-01	4.2	-	-	PERFORM	-	-	-	-	-	-	-	-	-	-	-	-	-	-	-	-	-	-	-	-	-	-	-	-	-	-	-	-	-	-	-	-	-	-	-	-	-	-	-	-	-	-
BIV-1101-1450-E01	Control	-	2018-06-01	4.2	-	-	PERFORM	-	-	-	-	-	-	-	-	-	-	-	-	-	-	-	-	-	-	-	-	-	-	-	-	-	-	-	-	-	-	-	-	-	-	-	-	-	-	-	-	-	-
BIV-1101-1449-E01	Control	-	2018-06-01	5.6	-	-	PERFORM	-	-	-	-	-	-	-	-	-	-	-	-	-	-	-	-	-	-	-	-	-	-	-	-	-	-	-	-	-	-	-	-	-	-	-	-	-	-	-	-	-	-
BIV-1101-1443-E01	Control	-	2018-05-25	4.6	-	-	PERFORM	-	-	-	-	-	-	-	-	-	-	-	-	-	-	-	-	-	-	-	-	-	-	-	-	-	-	-	-	-	-	-	-	-	-	-	-	-	-	-	-	-	-
BIV-1101-1442-E01	Control	-	2018-05-25	5.1	-	-	PERFORM	-	-	-	-	-	-	-	-	-	-	-	-	-	-	-	-	-	-	-	-	-	-	-	-	-	-	-	-	-	-	-	-	-	-	-	-	-	-	-	-	-	-
BIV-1101-1436-E01	Control	-	2018-05-18	5.6	-	-	PERFORM	-	-	-	-	-	-	-	-	-	-	-	-	-	-	-	-	-	-	-	-	-	-	-	-	-	-	-	-	-	-	-	-	-	-	-	-	-	-	-	-	-	-
BIV-1101-1430-E01	Control	-	2018-05-15	3.6	-	-	PERFORM	-	-	-	-	-	-	-	-	-	-	-	-	-	-	-	-	-	-	-	-	-	-	-	-	-	-	-	-	-	-	-	-	-	-	-	-	-	-	-	-	-	-
BIV-1101-1389-E01	Adenovirus with normal ALT (blood)	2920	2018-02-18	0.9	CONJUNCTIVITIS	17	PERFORM	-	-	-	-	-	-	-	-	-	-	-	-	-	-	-	-	-	-	-	-	-	-	-	-	-	-	-	-	-	-	-	-	-	-	-	-	-	-	-	-	-	-
BIV-1101-1381-E01	Adenovirus with normal ALT (blood)	6700	2018-02-07	0.6	FEVER WITHOUT SOURCE	14	PERFORM	-	-	-	-	-	-	-	-	-	-	-	-	-	-	-	-	-	-	-	-	-	-	-	-	-	-	-	-	-	-	-	-	-	-	-	-	-	-	-	-	-	-
BIV-1101-1377-E01	Adenovirus with normal ALT (blood)	157	2018-02-04	1.3	URTI NON SPECIFIC	30	PERFORM	-	-	-	-	-	-	-	-	-	-	-	-	-	-	-	-	-	-	-	-	-	-	-	-	-	-	-	-	-	-	-	-	-	-	-	-	-	-	-	-	-	-
BIV-1101-1079-E01	Critical Illness with raised ALT	-	2017-04-05	0.6	BRONCHIOLITIS	990	PERFORM	-	-	-	-	-	-	-	-	-	-	-	-	-	-	-	-	-	-	-	-	-	-	-	-	-	-	-	-	-	-	-	-	-	-	-	-	-	-	-	-	-	-
BIV-1301-1222-E1	Non-adenovirus raised ALT	-	2017-10-03	8.7	EBV/GLANDULAR FEVER	473	PERFORM	-	-	-	-	17600	-	-	-	-	-	-	-	-	-	-	-	-	-	-	-	-	-	-	-	-	-	-	-	-	-	-	-	-	-	-	-	-	-	-	-	-	-
BIV-1101-1425-E01	Non-adenovirus raised ALT	-	2018-05-13	9.7	EBV/GLANDULAR FEVER	1722	PERFORM	-	-	-	-	-	-	-	-	-	-	-	-	-	-	-	-	-	-	-	-	-	-	-	-	-	-	-	-	-	-	-	-	-	-	-	-	-	-	-	-	-	-
BIV-1101-1428-E01	Healthy	-	2018-05-16	8.6	-	-	PERFORM	-	-	-	-	-	-	-	-	-	-	-	-	-	-	-	-	-	-	-	-	-	-	-	-	-	-	-	-	-	-	-	-	-	-	-	-	-	-	-	-	-	-
BIV-1101-1432-E01	Healthy	-	2018-05-15	9.2	-	-	PERFORM	-	-	-	-	-	-	-	-	-	-	-	-	-	-	-	-	-	-	-	-	-	-	-	-	-	-	-	-	-	-	-	-	-	-	-	-	-	-	-	-	-	-
BIV-1801-1448-E1	Other hepatitis	-	2018-06-06	9.2	B15 Viral hepatitis	1392.52	PERFORM	-	-	-	-	-	-	363	2170	FALSE	FALSE	FALSE	FALSE	FALSE	FALSE	FALSE	FALSE	FALSE	FALSE	TRUE	FALSE	FALSE	FALSE	FALSE	FALSE	FALSE	FALSE	FALSE	FALSE	-	-	-	-	-	-	-	-	-	-	-	-	-	-
[truncated: 8 more columns]
