# Supplementary material for: Genomic investigations of unexplained acute hepatitis in children
Source: Nature. 2023 Mar 30;617(7961):564–73. doi: 10.1038/s41586-023-06003-w (PMC10170458; doi:10.1038/s41586-023-06003-w)
Supplement: Supplementary file 7 — PCR Results. Not all samples were tested for all viruses due to lack of remaining material. LLP: low level positive (Ct value > 38 and < 45), ND: not determined (negative PCR results), NA: not tested due to lack of material. [file 41586_2023_6003_MOESM7_ESM.xlsx]

## Sheet: pcr_data
Patient Number	Specimen ID	Source	Sample type	Group	Control Type	AAV2 CT	HAdV CT	HHV-6B CT	Liver transplant	AAV2 PCR result	HAdV PCR Result	HHV-6B PCR Result	Age group (years)
1	JBL1	Birmingham	liver	case	Case	17.06	37.38	29.06	Y	positive	positive	positive	<8
2	JBL4	Birmingham	liver	case	Case	21.48	41.88	32.21	Y	positive	LLP	positive	<8
2	JBN1	University Hospital Wales	respiratory	case	Case	24.83	ND	ND	N	positive	negative	negative	<8
3	JBL3	Birmingham	liver	case	Case	19.97	37.46	30.25	Y	positive	positive	positive	<8
4	JBL2	Birmingham	liver	case	Case	19.57	37.28	27.24	Y	positive	positive	positive	<8
4	JBB25	UKHSA	blood	case	Case	NA	34.23	NA	N	NA	positive	NA	<8
5	JBL5	Birmingham	liver	case	Case	21.19	36.52	27.67	Y	positive	positive	positive	<8
6	JBB9/JBB14	UKHSA	blood	case	Case	23.6	36.23	37.29	N	positive	positive	positive	<8
7	JBB10/JBB11	UKHSA	blood	case	Case	21	36	37.35	N	positive	positive	positive	<8
8	JBB13	UKHSA	blood	case	Case	22.43	ND	ND	N	positive	negative	negative	<8
9	JBB1	UKHSA	blood	case	Case	18.71	NA	NA	N	positive	NA	NA	<8
10	JBB15	UKHSA	blood	case	Case	ND	ND	36.72	N	negative	negative	positive	8-9
11	JBB2	Glasgow Royal Infirmary	blood	case	Case	19.69	31	37.43	N	positive	positive	positive	<8
12	JBB12	UKHSA	blood	case	Case	21.46	37	ND	N	positive	positive	negative	<8
13	JBB7	Glasgow Royal Infirmary	blood	case	Case	20.95	31	NA	N	positive	positive	NA	<8
14	JBB8	Glasgow Royal Infirmary	blood	case	Case	20.28	30	NA	N	positive	positive	NA	<8
15	JBB3/JBB4	Glasgow Royal Infirmary	blood	case	Case	21.6	29.5	NA	N	positive	positive	NA	<8
16	JBB5	Glasgow Royal Infirmary	blood	case	Case	22.63	33	NA	N	positive	positive	NA	<8
17	JBB17	UKHSA	stool	case	Case	30.3	ND	ND	N	positive	negative	negative	<8
17	JBB18	UKHSA	respiratory	case	Case	30.47	39	44.51	N	positive	LLP	LLP	<8
18	JBB19	UKHSA	blood	case	Case	NA	34.05	NA	N	NA	positive	NA	<8
19	JBB20/JBB23	UKHSA	blood	case	Case	NA	36.65	NA	N	NA	positive	NA	<8
20	JBB21	UKHSA	blood	case	Case	NA	35.9	NA	N	NA	positive	NA	<8
21	JBB26	University Hospital Wales	respiratory	case	Case	NA	35.73	NA	N	NA	positive	NA	<8
27	JBB24	UKHSA	blood	case	Case	NA	33.89	NA	N	NA	positive	NA	<8
28	JBL6	King's College Hospital	liver_ffpe	case	Case	24.97	ND	32.31	Y	positive	negative	positive	<8
29	JBL7	King's College Hospital	liver_ffpe	case	Case	24.31	40.38	30.01	Y	positive	LLP	positive	<8
30	JBL9	King's College Hospital	liver_ffpe	case	Case	35.93	ND	ND	N	positive	negative	negative	<8
31	JBL10	King's College Hospital	liver_ffpe	case	Case	24.26	ND	30.05	Y	positive	negative	positive	<8
32	JBL11	King's College Hospital	liver_ffpe	case	Case	25.14	ND	ND	Y	positive	negative	negative	<8
32	JBB34	King's College Hospital	plasma	case	Case	27.71	ND	ND	Y	positive	negative	negative	<8
33	JBL12	King's College Hospital	liver_ffpe	case	Case	23.88	40.88	31.02	Y	positive	LLP	positive	<8
34	JBL13	King's College Hospital	liver_ffpe	case	Case	22.92	44.06	36.57	Y	positive	LLP	positive	<8
34	JBB36	King's College Hospital	plasma	case	Case	28.25	ND	ND	Y	positive	negative	negative	<8
35	JBL14	King's College Hospital	liver_ffpe	case	Case	33.89	ND	ND	N	positive	negative	negative	<8
35	JBB35	King's College Hospital	plasma	case	Case	28.96	ND	ND	N	positive	negative	negative	<8
36	JBL15	King's College Hospital	liver_ffpe	case	Case	24.83	40.94	31.15	Y	positive	LLP	positive	<8
36	JBB37	King's College Hospital	plasma	case	Case	27.47	41.66	ND	Y	positive	LLP	negative	<8
37	JBB38	King's College Hospital	plasma	case	Case	26.74	38.98	ND	N	positive	LLP	negative	<8
38	JBB39	King's College Hospital	plasma	case	Case	31.91	ND	ND	N	positive	negative	negative	<8
NA	CONB36	GOSH	blood	control	Adenovirus viraemia	24	36.85	NA	NA	positive	positive	NA	<8
NA	CONB23	GOSH	blood	control	Adenovirus viraemia	24.61	39.3	30.04	NA	positive	LLP	positive	<8
NA	CONB37	GOSH	blood	control	Adenovirus viraemia	26.49	29.04	ND	NA	positive	positive	negative	<8
NA	CONB39	GOSH	blood	control	Adenovirus viraemia	28.91	36.94	ND	NA	positive	positive	negative	<8
NA	CONB26	GOSH	blood	control	Adenovirus viraemia	36.14	42.27	ND	NA	positive	LLP	negative	<8
NA	CONB25	GOSH	blood	control	Adenovirus viraemia	36.95	36.31	ND	NA	positive	positive	negative	<8
NA	CONL3	GOSH	liver	control	Control	39.17	ND	ND	NA	LLP	negative	negative	<10
NA	CONB5	GOSH	blood	control	CMV viraemia	ND	ND	ND	NA	negative	negative	negative	<8
NA	CONB6	GOSH	blood	control	CMV viraemia	ND	ND	34.92	NA	negative	negative	positive	<8
NA	CONL1	GOSH	liver	control	Control	ND	ND	ND	NA	negative	negative	negative	10-17
NA	CONB8	GOSH	blood	control	CMV viraemia	ND	NA	ND	NA	negative	NA	negative	<8
NA	CONL2	GOSH	liver	control	Control	ND	ND	33.98	NA	negative	negative	positive	<10
NA	CONB30	GOSH	blood	control	Adenovirus viraemia	ND	38.75	ND	NA	negative	LLP	negative	<8
NA	CONB29	GOSH	blood	control	Adenovirus viraemia	ND	37.28	ND	NA	negative	positive	negative	<8
NA	CONL4	GOSH	liver	control	Control	ND	ND	ND	NA	negative	negative	negative	10-17
NA	CONB27	GOSH	blood	control	Adenovirus viraemia	ND	37.02	35.65	NA	negative	positive	positive	<8
NA	CONB31	GOSH	blood	control	Adenovirus viraemia	ND	32.58	ND	NA	negative	positive	negative	<8
NA	CONB34	GOSH	blood	control	Adenovirus viraemia	ND	39.58	33.51	NA	negative	LLP	positive	<8
NA	CONB33	GOSH	blood	control	Adenovirus viraemia	ND	40.13	ND	NA	negative	LLP	negative	<8
NA	CONB35	GOSH	blood	control	Adenovirus viraemia	ND	38.71	NA	NA	negative	LLP	NA	<8
NA	CONB38	GOSH	blood	control	Adenovirus viraemia	ND	38.22	36.49	NA	negative	LLP	positive	<8
NA	CONB40	UKHSA	blood	control	HLH	ND	32	ND	NA	negative	positive	negative	<8
NA	BIV-1601-1284-E1	PERFORM	blood	control	Other hepatitis	ND	NA	NA	NA	negative	NA	NA	<8
NA	BIV-1601-1300-E1	PERFORM	blood	control	Other hepatitis	ND	NA	NA	NA	negative	NA	NA	<8
NA	BIV-1601-1489-E1	PERFORM	blood	control	Other hepatitis	ND	NA	NA	NA	negative	NA	NA	<8
NA	BIV-1301-1175-E1	PERFORM	blood	control	Adenovirus with normal ALT (blood)	29.88	NA	NA	NA	positive	NA	NA	<8
NA	BIV-1301-1314-E1	PERFORM	blood	control	Adenovirus with normal ALT (blood)	ND	NA	NA	NA	negative	NA	NA	<8
NA	BIV-1301-1320-E2	PERFORM	blood	control	Adenovirus with normal ALT	ND	NA	NA	NA	negative	NA	NA	<8
NA	BIV-1301-1401-E1	PERFORM	blood	control	Adenovirus with normal ALT	ND	NA	NA	NA	negative	NA	NA	<8
NA	BIV-1301-1402-E1	PERFORM	blood	control	Adenovirus with normal ALT	ND	NA	NA	NA	negative	NA	NA	<8
NA	BIV-1101-1624-E01	PERFORM	blood	control	Critical Illness with raised ALT	ND	NA	NA	NA	negative	NA	NA	<8
NA	BIV-1101-1646-E01	PERFORM	blood	control	Adenovirus with normal ALT	ND	NA	NA	NA	negative	NA	NA	<8
NA	BIV-1101-1655-E01	PERFORM	blood	control	Non-adenovirus raised ALT	ND	NA	NA	NA	negative	NA	NA	<8
NA	BIV-1101-1673-E01	PERFORM	blood	control	Adenovirus with normal ALT	ND	NA	NA	NA	negative	NA	NA	<8
NA	BIV-1101-1680-E01	PERFORM	blood	control	Adenovirus with normal ALT	ND	NA	NA	NA	negative	NA	NA	<8
NA	BIV-1101-1806-E01	PERFORM	blood	control	Other hepatitis	ND	NA	NA	NA	negative	NA	NA	<8
NA	BIV-1101-1813-E01	PERFORM	blood	control	Adenovirus with raised ALT	ND	NA	NA	NA	negative	NA	NA	<8
NA	BIV-1101-1848-E01	PERFORM	blood	control	Adenovirus with raised ALT	ND	NA	NA	NA	negative	NA	NA	<8
NA	BIV-1101-1079-E01	PERFORM	blood	control	Critical Illness with raised ALT	ND	NA	NA	NA	negative	NA	NA	<8
NA	BIV-1101-1377-E01	PERFORM	blood	control	Adenovirus with normal ALT (blood)	37.97	NA	NA	NA	positive	NA	NA	<8
NA	BIV-1101-1381-E01	PERFORM	blood	control	Adenovirus with normal ALT (blood)	ND	NA	NA	NA	negative	NA	NA	<8
NA	BIV-1101-1389-E01	PERFORM	blood	control	Adenovirus with normal ALT (blood)	27.38	NA	NA	NA	positive	NA	NA	<8
NA	BIV-1101-1468-E01	PERFORM	blood	control	Adenovirus with normal ALT (blood)	ND	NA	NA	NA	negative	NA	NA	<8
NA	BIV-1101-1430-E01	PERFORM	blood	control	Healthy	ND	NA	NA	NA	negative	NA	NA	<8
NA	BIV-1101-1436-E01	PERFORM	blood	control	Healthy	38.94	NA	NA	NA	LLP	NA	NA	<8
NA	BIV-1101-1442-E01	PERFORM	blood	control	Healthy	ND	NA	NA	NA	negative	NA	NA	<8
NA	BIV-1101-1443-E01	PERFORM	blood	control	Healthy	ND	NA	NA	NA	negative	NA	NA	<8
NA	BIV-1101-1449-E01	PERFORM	blood	control	Healthy	ND	NA	NA	NA	negative	NA	NA	<8
NA	BIV-1101-1450-E01	PERFORM	blood	control	Healthy	ND	NA	NA	NA	negative	NA	NA	<8
NA	BIV-1101-1451-E01	PERFORM	blood	control	Healthy	ND	NA	NA	NA	negative	NA	NA	<8
NA	BIV-1101-1463-E01	PERFORM	blood	control	Healthy	ND	NA	NA	NA	negative	NA	NA	<8
NA	BIV-1101-1475-E01	PERFORM	blood	control	Healthy	ND	NA	NA	NA	negative	NA	NA	<8
NA	BIV-1101-1492-E01	PERFORM	blood	control	Healthy	ND	NA	NA	NA	negative	NA	NA	<8
NA	BIV-1101-1504-E01	PERFORM	blood	control	Healthy	ND	NA	NA	NA	negative	NA	NA	<8
NA	BIV-1101-1505-E01	PERFORM	blood	control	Healthy	ND	NA	NA	NA	negative	NA	NA	<8
NA	BIV-1101-1511-E01	PERFORM	blood	control	Healthy	ND	NA	NA	NA	negative	NA	NA	<8
NA	BIV-1101-1524-E01	PERFORM	blood	control	Non-adenovirus raised ALT	ND	NA	NA	NA	negative	NA	NA	<8
NA	BIV-1101-1538-E01	PERFORM	blood	control	Other hepatitis	ND	NA	NA	NA	negative	NA	NA	<8
NA	BIV-1101-1586-E01	PERFORM	blood	control	Adenovirus with normal ALT (blood)	27.09	NA	NA	NA	positive	NA	NA	<8
NA	BIV-1102-1242-E01	PERFORM	blood	control	Critical Illness with raised ALT	ND	NA	NA	NA	negative	NA	NA	<8
NA	BIV-1701-1236-E1	PERFORM	blood	control	Adenovirus with normal ALT	ND	NA	NA	NA	negative	NA	NA	<8
NA	BIV-1401-1093-E1	PERFORM	blood	control	Critical Illness with raised ALT	ND	NA	NA	NA	negative	NA	NA	<8
NA	BIV-1401-1013-E1	PERFORM	blood	control	Critical Illness with raised ALT	ND	NA	NA	NA	negative	NA	NA	<8
NA	BIV-1401-1160-E1	PERFORM	blood	control	Adenovirus with raised ALT	ND	NA	NA	NA	negative	NA	NA	<8
NA	BIV-1401-1184-E1	PERFORM	blood	control	Critical Illness with raised ALT	ND	NA	NA	NA	negative	NA	NA	<8
NA	BIV-1104-1023-E1	PERFORM	blood	control	Non-adenovirus raised ALT	ND	NA	NA	NA	negative	NA	NA	<8
NA	BIV-1104-1107-E1	PERFORM	blood	control	Adenovirus with raised ALT	ND	NA	NA	NA	negative	NA	NA	<8
NA	BIV-1801-1397-E1	PERFORM	blood	control	Adenovirus with normal ALT (blood)	ND	NA	NA	NA	negative	NA	NA	<8
NA	BIV-2201-1002-E1	PERFORM	blood	control	Adenovirus with normal ALT	ND	NA	NA	NA	negative	NA	NA	<8
NA	BIV-2201-1004-E1	PERFORM	blood	control	Adenovirus with normal ALT	ND	NA	NA	NA	negative	NA	NA	<8
NA	BIV-2201-1025-E1	PERFORM	blood	control	Non-adenovirus raised ALT	ND	NA	NA	NA	negative	NA	NA	<8
NA	BIV-2201-1047-E1	PERFORM	blood	control	Adenovirus with normal ALT	ND	NA	NA	NA	negative	NA	NA	<8
NA	DIS-1101-1183-E01	DIAMONDS	blood	control	Adenovirus with normal ALT	ND	NA	NA	NA	negative	NA	NA	<8
NA	DIS-1101-1130-E01	DIAMONDS	blood	control	Adenovirus with normal ALT	ND	NA	NA	NA	negative	NA	NA	<8
NA	DIS-1101-1197-E01	DIAMONDS	blood	control	Other hepatitis	ND	NA	NA	NA	negative	NA	NA	<8
NA	DIS-1101-1278-E01	DIAMONDS	blood	control	Adenovirus with raised ALT	ND	NA	NA	NA	negative	NA	NA	<8
NA	DIS-1101-1224-E01	DIAMONDS	blood	control	Adenovirus with normal ALT	ND	NA	NA	NA	negative	NA	NA	<8
NA	DIS-1105-1063-E01	DIAMONDS	blood	control	Critical Illness with raised ALT	ND	NA	NA	NA	negative	NA	NA	<8
NA	DIS-1101-1322-E01	DIAMONDS	blood	control	Adenovirus with normal ALT	ND	NA	NA	NA	negative	NA	NA	<8
NA	DIS-1123-1090-E01	DIAMONDS	blood	control	Critical Illness with raised ALT	ND	NA	NA	NA	negative	NA	NA	<8
NA	DIS-1107-1084-E01	DIAMONDS	blood	control	Adenovirus with normal ALT	ND	NA	NA	NA	negative	NA	NA	<8
NA	DIS-1101-1450-E01	DIAMONDS	blood	control	Adenovirus with normal ALT	ND	NA	NA	NA	negative	NA	NA	<8
NA	DIS-1107-1046-E01	DIAMONDS	blood	control	Adenovirus with normal ALT	ND	NA	NA	NA	negative	NA	NA	<8
NA	DIS-1116-1056-E01	DIAMONDS	blood	control	Non-adenovirus raised ALT	ND	NA	NA	NA	negative	NA	NA	<8
NA	DIS-1116-1003-E01	DIAMONDS	blood	control	Critical Illness with raised ALT	ND	NA	NA	NA	negative	NA	NA	<8
NA	DIS-1116-1047-E01	DIAMONDS	blood	control	Critical Illness with raised ALT	ND	NA	NA	NA	negative	NA	NA	<8
NA	DIS-1101-1539-E01	DIAMONDS	blood	control	Critical Illness with raised ALT	36.95	NA	NA	NA	positive	NA	NA	<8
NA	BIV-1301-1222-E1	PERFORM	blood	control	Non-adenovirus raised ALT	ND	NA	NA	NA	negative	NA	NA	8-9
NA	BIV-1101-1425-E01	PERFORM	blood	control	Non-adenovirus raised ALT	ND	NA	NA	NA	negative	NA	NA	8-9
NA	BIV-1101-1428-E01	PERFORM	blood	control	Healthy	ND	NA	NA	NA	negative	NA	NA	8-9
NA	BIV-1101-1432-E01	PERFORM	blood	control	Healthy	ND	NA	NA	NA	negative	NA	NA	8-9
NA	BIV-1801-1448-E1	PERFORM	blood	control	Other hepatitis	ND	NA	NA	NA	negative	NA	NA	8-9
NA	CONL5	GOSH	liver	control	Control	ND	ND	32.91	NA	negative	negative	positive	18-65
NA	CONL6	GOSH	liver	control	Control	ND	ND	29.43	NA	negative	negative	positive	18-65
NA	JBL16	King's College Hospital	liver_ffpe	control	Hepatoblastoma	ND	ND	37.39	NA	negative	negative	positive	<18
NA	CONL7	QMUL	liver_ffpe	control	Control	ND	NA	ND	NA	negative	NA	negative	>18
NA	CONL8	QMUL	liver_ffpe	control	Control	ND	NA	ND	NA	negative	NA	negative	>18
NA	CONL9	QMUL	liver_ffpe	control	Control	ND	NA	ND	NA	negative	NA	negative	>18
NA	CONL10	QMUL	liver_ffpe	control	Control	ND	NA	ND	NA	negative	NA	negative	>18
NA	CONL11	QMUL	liver_ffpe	control	Control	ND	NA	ND	NA	negative	NA	negative	>18
NA	CONL12	QMUL	liver_ffpe	control	Control	ND	NA	ND	NA	negative	NA	negative	<10
NA	CONL13	QMUL	liver_ffpe	control	Control	ND	NA	ND	NA	negative	NA	negative	<10
NA	CONL14	QMUL	liver_ffpe	control	Control	ND	NA	36.75	NA	negative	NA	positive	>18
NA	CONL15	QMUL	liver_ffpe	control	Control	ND	NA	ND	NA	negative	NA	negative	>18
NA	CONL16	QMUL	liver_ffpe	control	Control	ND	NA	ND	NA	negative	NA	negative	>18
