# Supplementary material for: Genomic investigations of unexplained acute hepatitis in children
Source: Nature. 2023 Mar 30;617(7961):564–73. doi: 10.1038/s41586-023-06003-w (PMC10170458; doi:10.1038/s41586-023-06003-w)
Supplement: Supplementary file 10 — Mapping of HAdV partial sequences. [file 41586_2023_6003_MOESM10_ESM.xlsx]

## Sheet: Sheet1
Case	Sample Name	Sample type	Best Reference	Genotype from WGS	Average Read Depth	Percent Coverage	Number of bases Covered	Number of mapped forward reads	Number of mapped reverse reads
4	JBB25	Blood	OP047699	F41	0.603	13.1979	4510	67	71
6	JBB9	Blood	OP047699	F41	0.6103	33.504	11449	72	66
7	JBB11	Blood	OP047699	F41	0.574	29.053	9928	67	64
11	JBB2	Blood	OP047699	F41	0.5678	4.6822	1600	75	66
13	JBB7	Blood	OP047699	-	0.8246	2.224	760	94	94
14	JBB8	Blood	OP047699	-	1.2431	5.9844	2045	140	152
18	JBB19	Blood	OP047699	F41	0.5649	13.0516	4460	60	67
19	JBB20	Blood	OP047699	-	0.1502	3.2424	1108	17	17
19	JBB23	Blood	OP047699	F41	0.053	0.8838	302	6	6
20	JBB21	Blood	OP047699	F41	0.8029	12.6975	4339	96	87
21	JBB26	NPA	OP047699	C1/F41	2.4752	20.1949	6901	304	257
25	JBB31	Blood	OP047699	F41	66.8951	93.4742	31942	7690	7616
27	JBB24	Blood	OP047699	F41	1.0334	19.3609	6616	120	114
