# Supplementary material for: Genomic investigations of unexplained acute hepatitis in children
Source: Nature. 2023 Mar 30;617(7961):564–73. doi: 10.1038/s41586-023-06003-w (PMC10170458; doi:10.1038/s41586-023-06003-w)
Supplement: Supplementary file 11 — AAV2 whole genome sequencing: OTR: on target reads, MRD: mean read depth, Coverage 1X: percentage of genome covered at depth 1, Coverage 10X: percentage of genome covered at depth 10. [file 41586_2023_6003_MOESM11_ESM.xlsx]

## Sheet: Sheet1
Case ID	Specimen	Genbank ID	Reads	%OTR	MRD	Coverage (10X)
Blood case
6	JBB14	-	342452	97.74	9600.13	94
6	JBB16	-	327284	97.7	9166.01	97
6	JBB9	OP161123	329022	87.31	8190.91	94
7	JBB10	-	126690	0.59	19.28	49
7	JBB11	OP161124	290738	88.43	7464.56	94
8	JBB13	OP161126	316126	99.32	8860.94	94
8	JBPL1	-	321812	99.61	9038.12	94
9	JBB1	OP161119	337920	96.34	9281.79	94
11	JBB2	OP161120	324956	53.8	4902.15	94
12	JBB12	OP161125	324716	77.59	7227.41	94
13	JBB7	OP161127	642074	89.71	15590.3	95
14	JBB8	OP161128	697032	93.43	18001.3	95
15	JBB3	OP161121	311086	87.08	7722.32	94
15	JBB4	-	334448	97.58	9399.23	94
16	JBB5	OP161122	264302	81.95	6187.97	94
Liver case
1	JBL1	OP161114	255384	98.13	10388.8	97
2	JBL4	OP161117	183640	80.96	5223.16	93
3	JBL3	OP161116	197596	93.56	6608.56	98
4	JBL2	OP161115	206068	92.48	6687.28	98
5	JBL5	OP161118	1154046	80.52	18651	100
Respiratory case
2	JBN1	-	376022	81.56	8587.65	88
17	JBB18	-	293892	21.66	1795.36	85
Stool case
17	JBB17	-	29418	8.33	677.85	79
Blood control
-	CONB23	OP161129	320676	85.75	7816.53	94
-	CONB36	OP161132	533388	86.19	12302.4	95
-	CONB37	OP161133	594528	89.49	14099.9	95
-	CONB39	OP161134	477186	60.26	7755.42	95
Stool control
-	CONS3	OP161130	350572	99.87	10023.2	95
-	CONS6	OP161131	318630	99.87	9054.01	94
