# Supplementary material for: Genomic investigations of unexplained acute hepatitis in children
Source: Nature. 2023 Mar 30;617(7961):564–73. doi: 10.1038/s41586-023-06003-w (PMC10170458; doi:10.1038/s41586-023-06003-w)
Supplement: Supplementary file 12 — HHV-6B whole genome sequencing from liver case samples. OTR: on target reads, MRD: mean read depth, Coverage 1X: percentage of genome covered at depth 1, Coverage 10X: percentage of genome covered at depth 10. [file 41586_2023_6003_MOESM12_ESM.xlsx]

## Sheet: Sheet1
Case	Specimen	Genbank ID	Total Reads	OTR	MRD	Coverage 1X	Coverage 10X
1	JBL1	OP271777	1309913	0.0982	76.43	93.89	2.67
2	JBL4	OP271778	1409364	0.1025	91.45	91.7	2.06
3	JBL3	-	1469731	0.1046	98.06	87.5	1.9
4	JBL2	OP271779	1274320	0.1673	193.84	96.58	93.58
