# Supplementary material for: Genomic investigations of unexplained acute hepatitis in children
Source: Nature. 2023 Mar 30;617(7961):564–73. doi: 10.1038/s41586-023-06003-w (PMC10170458; doi:10.1038/s41586-023-06003-w)
Supplement: Supplementary file 13 — Cytokine modules - cytokine-inducible transcriptional signatures of cell-mediated immunity. [file 41586_2023_6003_MOESM13_ESM.xlsx]

## Sheet: TST derived modules
Cytokine regulator	Target Molecules in Dataset
AIMP1	CCL2,CCL3,CCL4,CCL5,CXCL2,CXCL8,ICAM1,IFNG,IL10,IL12A,IL12B,IL1B,TNF
C5	AKT1,ATF3,ATF6,BCL2,C3AR1,C5AR1,C5AR2,CCL11,CCL13,CCL2,CCL3,CCL3L3,CCL4,CCL5,CCL7,CD46,CD59,CD63,CD86,CRP,CSF1,CSF2,CSF3,CXCL1,CXCL10,CXCL2,CXCL3,CXCL8,CYBB,EIF2AK2,ERN1,FASLG,FCGR1A,FCGR2A,FCGR2B,FLT1,HIVEP1,HSPA5,ICAM1,IFNG,IFNGR2,IL10,IL12A,IL12B,IL13,IL17F,IL18R1,IL1B,IL2,IL23A,IL27,IL4,IL5,IL6,IL9,ITGAM,ITGB2,MET,MMP1,MMP3,MMP9,MPO,NFKB1,NFKBIA,NGF,PPP1R15A,RGS3,SELE,SERPINE1,SMAD7,ST6GAL1,T…
CCL2	BCL2,BCL2L1,CCL1,CCL11,CCL2,CCL5,CCR2,CD40,CD40LG,CD80,CD86,CEBPD,CFLAR,CXCL10,CXCL3,CXCL8,FASLG,ICAM1,IFNAR1,IFNG,IL10,IL12A,IL12B,IL13,IL15,IL1B,IL2,IL23A,IL32,IL4,IL6,ITGA5,ITGAL,LCN2,MMP1,MMP10,MMP9,NCF1,PCNA,PTGS2,SERPINE1,SLC11A1,STAT1,TGFB1,TIMP1,TNF,VCAM1,VEGFA,ZC3H12A
CCL3	APOBEC3G,CCL2,CCL20,CCL3,CCL4,CCR1,CCR5,CXCL9,IFNG,IL12A,IL1B,IL6,ITGA5,ITGAM,ITGB1,SELE,STAT1,STAT3,TNF,TNFSF11
CD40LG	ADAM28,AHR,AKAP13,ALG3,ANXA6,ANXA7,APOBEC3G,ARID4B,ARMC6,ARSB,ASCC3,ATF3,ATF5,B2M,BATF,BATF3,BAX,BCL2,BCL2A1,BCL2L1,BIRC2,BIRC3,BTG1,BTG3,CA2,CASP1,CBX3,CCL17,CCL18,CCL19,CCL2,CCL20,CCL22,CCL3,CCL3L3,CCL4,CCL5,CCND3,CCR1,CCR2,CCR5,CCR7,CD1C,CD1D,CD27,CD38,CD40,CD40LG,CD44,CD63,CD69,CD80,CD83,CD86,CD8A,CDC25B,CDKN1A,CELF2,CFLAR,CFP,CIITA,CLNS1A,CLU,CSF1,CSF2RA,CSTF2,CTSC,CXCL1,CXCL10,CXCL2,CXCL5,C…
CSF1	ACP5,ADGRE5,BAX,BCL2,BCL2L1,BCL2L11,C5AR1,CAPN2,CBL,CCL2,CCL3,CCL5,CCND2,CCND3,CCR1,CCR2,CCR5,CD163,CD209,CD68,CD74,CD80,CD86,CDC25A,CDKN1A,CFP,CLEC7A,CREB1,CSF1,CSF1R,CTSH,CX3CR1,CXCL10,CXCL11,CXCL2,CXCL3,CXCL6,CXCL9,CYBB,DAGLA,DICER1,DOK2,DUSP4,DUSP5,EGR2,ENO1,ETS2,FAS,FASLG,FCER1G,FCGR2A,FCGR3A/FCGR3B,FERMT3,GAB3,GLS,GPI,GPR68,GRAP2,HIF1A,HK2,HLA-A,HSP90B1,HSPA5,IDO1,IFIT1,IFIT2,IFNG,IFNGR1,IK…
CSF2	ACP5,ADA,ADAM8,ADGRE5,AKR1A1,ALOX5,ALOX5AP,ANXA1,ARRB1,AURKA,BATF3,BAX,BCL2,BCL2A1,BCL2L1,BCL2L11,BCL3,BID,BIRC3,BSG,C3,C4A/C4B,C5AR1,CARD11,CARD6,CASP1,CASP3,CCL17,CCL18,CCL2,CCL25,CCL3,CCL3L3,CCL4,CCND2,CCND3,CCR1,CCR2,CCR5,CCR7,CCRL2,CD101,CD14,CD163,CD180,CD1B,CD1C,CD209,CD276,CD28,CD33,CD38,CD40,CD40LG,CD5,CD63,CD69,CD74,CD80,CD83,CD86,CD8A,CDC123,CDKN1A,CEACAM1,CHST11,CIITA,CISH,CLEC4C,CLEC…
EBI3	B2M,CCL11,CCND2,CCND3,CCR6,CD274,CD80,CD86,CIITA,ENTPD1,EOMES,FAS,GADD45G,GBP2,HAVCR2,HLA-A,HLA-B,HLA-C,HLA-DMA,HLA-DMB,HLA-DOB,HLA-DPA1,HLA-DQA1,HLA-DRA,ICAM1,IFNG,IL10,IL12RB2,IL13,IL2,IL21,IL22,IL4,IL5,IRF1,LAG3,MX1,MYC,NFATC1,PDCD1,PDCD1LG2,PIM1,STAT1,STAT2,TAP1,TBX21,TNFSF10
EDN1	ACTB,ADAM12,ADAM19,ANXA1,ANXA5,ANXA6,AREG,ARF6,ARHGEF11,ATF6,ATP2A2,BCL2,BCL2A1,CALCRL,CCL2,CCN1,CCR7,CDC25A,CDC42,COL4A1,CST3,CXCL8,CXCR4,CYBB,EDN1,EIF3J,FOSL1,FST,GRN,HBEGF,HIF1A,HSPA5,HSPA8,ICAM1,IL6,ITGA5,ITGAM,ITGB1,ITGB1BP2,ITGB3,JUN,JUNB,MAP2K1,MARCKSL1,MMP1,MMP13,MMP3,MMP9,MSN,MYC,MYH7,MYL6,MYO9B,NCF1,NPM1,NPPA,NRG1,ODC1,PDIA6,PLAU,PLAUR,PRKCA,PRKCB,PRKCD,PRL,PTGER2,PTGER4,PTGS2,PXN,RAMP3…
FLT3LG	ADGRE5,CCL5,CCND3,CCR5,CCR7,CD19,CD274,CD3D,CD3G,CD40,CD79A,CD80,CD83,CD86,CXCL2,CXCL3,CXCR4,CYBB,FCGR1A,FLT3,FOXP3,HOXB4,ICAM1,IFNG,IL10,IL15RA,IL1B,IL1RL1,IL2,IL2RA,IL2RB,IL3RA,IL7R,IRF8,ITGAM,MCL1,MPO,PAX5,PTPRC,ROCK1,SLC12A3,SOCS1,SPI1,SPN,TNF
IFNA1	CCL8,CD274,CD40,CD69,CD80,CD83,CD86,CXCL10,CXCL11,CXCL9,DHX58,EIF2AK2,IFI27,IFI6,IFIH1,IFIT1,IFIT2,IFITM1,IFNAR1,IFNG,IL1B,IRF1,IRF7,ISG15,MX1,MYC,OAS1,OAS2,PLAAT4,PLSCR1,PTGS2,RSAD2,SIGLEC1,SOCS1,STAT1,STAT2,STAT4,TLR3,UBE2D1,UBE2L6,ZBP1
IFNA10	CCL8,CXCL10,CXCL11,CXCL9,IFIH1,IFIT1,IFNG,ISG15,MX1,PLAAT4,STAT4,ZBP1
IFNA14	CCL8,CXCL10,CXCL11,CXCL9,IFIH1,IFIT1,IFNG,IRF7,ISG15,ISG20,MX1,PLAAT4,RSAD2,STAT4,ZBP1
IFNA17	CD86,CXCL10,CXCL11,CXCL9,EIF2AK2,IFIH1,IFNG,MX1,PLAAT4,STAT4,ZBP1
IFNA2	ADGRE1,ALOX5,ANXA1,APOL6,ATF5,B2M,BAX,BCL2,BCL2L14,BST2,C1R,C1S,CBFB,CCDC92,CCL2,CCL3,CCL5,CCL8,CD274,CD28,CD69,CD86,CDKN1A,CDKN2A,CEACAM1,CIITA,CISH,CMPK2,CNP,CXCL10,CXCL11,CXCL13,CXCL9,CXCR3,DAD1,DDX56,DDX58,DDX60,DIABLO,DPP4,EIF2AK2,EPB41L3,FAS,GAB3,GBP1,GBP2,GBP4,HBEGF,HERC5,HERC6,HIF1A,HLA-A,HLA-B,HLA-C,HLA-DRB1,HLA-E,HSH2D,HSPA6,IDO1,IFI16,IFI27,IFI27L2,IFI35,IFI44,IFI44L,IFI6,IFIH1,IFIT1,I…
IFNA4	AP1S3,CCL8,CCRL2,CD274,CD69,CD86,CLIC4,CXCL10,CXCL11,CXCL9,GBP2,GBP5,HLA-E,IFIH1,IFIT1,IFIT2,IFNG,IL2,IL4,IL6,ISG15,JAML,LILRB4,MAP3K8,MITD1,MX1,MYC,OASL,PIK3AP1,PLAAT4,RSAD2,SLCO3A1,STAT4,TREML2,USP18,ZBP1
IFNB1	ACOD1,ANXA5,APOL1,APOL2,APOL3,APOL6,BAK1,BCL2,BCL2L1,BHLHE40,BST2,BTN3A3,CAPN2,CARD6,CASP1,CASP3,CASP8,CCL2,CCL3,CCL4,CCL5,CCL7,CCR5,CD14,CD274,CD38,CD40,CD80,CD83,CD86,CDKN1A,CH25H,CLEC4E,CMPK2,CREM,CSF2,CX3CL1,CXCL10,CXCL11,CXCL2,CXCL3,CXCL6,CXCL8,CXCL9,DAXX,DDX58,DHX58,DICER1,EBI3,EIF2AK2,GBP1,GBP2,GBP3,GBP4,GBP5,GBP6,GBP7,GDF3,GNB4,GZMH,HERC5,HLA-A,IDO1,IFI16,IFI27,IFI6,IFIH1,IFIT1,IFIT1B,IFI…
IFNE	APOBEC3G,BST2,CD40,CD80,CD83,CD86,CDKN1A,CXCL10,CXCL11,CXCL9,EIF4E,HERC5,HSD11B1,IFIH1,IFIT2,IFITM3,IFNG,IL10,IL4,ISG15,ISG20,MX2,PLAAT4,PTGER2,PTGER4,PTGS2,STAT1,STAT4,TLR3,TRIM5,USP18,ZBP1
IFNG	ABCC1,ACE2,ACLY,ACO1,ACOD1,ACTB,ADA2,ADAMTS8,ADAMTS9,ADCY7,ADGRG2,ADM,ADORA2A,AGER,AHR,AIF1,AIM2,ALDH1A3,ALOX5AP,ALPL,ANGPTL4,APOBEC3G,APOL1,APOL6,ARAP2,AREG,AREL1,ARFGAP3,ARL6IP5,ASS1,ATF3,ATF4,ATG3,ATG5,ATP2A2,B2M,BACH1,BACH2,BAK1,BATF2,BAX,BCL2,BCL2A1,BCL2L1,BCL2L11,BCL3,BECN1,BID,BIRC2,BIRC3,BLNK,BRCA2,BST1,BST2,BTG1,BTN3A1,BTN3A2,BUD23,C15orf48,C1QA,C1QB,C1QC,C1R,C2,C3,C4A/C4B,C5AR1,CALCA,CA…
IFNK	CD40,CD80,CD83,CD86,CXCL10,CXCL11,CXCL9,EIF2AK2,IFIH1,IFNG,IRF1,MX1,OAS1,PLAAT4,STAT1,STAT4,TLR3,ZBP1
IFNL1	APOL6,ATF3,BST2,CCR7,CD40,CD80,CD83,CHAC1,CMPK2,CXCL10,CXCL11,CXCL8,CXCL9,DDX58,DDX60,DDX60L,EIF2AK2,GBP1,GBP5,HERC5,HERC6,HLA-B,HLA-C,IFI27,IFI35,IFI44,IFI44L,IFI6,IFIH1,IFIT1,IFIT2,IFIT3,IFIT5,IFITM1,IFITM2,IFITM3,IFNL1,IFNL2,IL10,IL12B,IL13,IL5,IL6,IRF9,ISG15,ISG20,LAMP3,LGALS3BP,MLKL,MX1,OAS1,OAS2,OAS3,OASL,PHF11,PLAAT4,PLSCR1,PML,PSMB9,RSAD2,RTP4,SAMD9,SHFL,SLC15A3,SP100,SP110,STAT1,STAT2,TD…
IFNL3	DDX58,IFIH1,IFNG,IL12A,IL12B,IL15,IL23A,IL2RA,ISG20,MMP9,MX1,RNASEL,RSAD2,SOCS1,STAT1,TLR2,TLR3,TLR4,TNF,USP18
IFNL4	CXCL10,CXCL11,DDX58,DHX58,IFI6,IFIH1,IFIT1,ISG15,MX1,OAS1,OAS2,OASL,STAT1
IFNW1	CD40,CD80,CD83,CD86,CXCL10,CXCL11,CXCL9,IFIH1,IFNG,MARCHF1,PLAAT4,STAT4,TLR3,ZBP1
IL12A	CCL5,CD86,CFLAR,CXCL10,EBI3,FAS,FASLG,ICAM1,IFNG,IL10,IL12A,IL12B,IL12RB1,IL12RB2,IL1B,IL2,IL22,IL27,IL4,IL6,IRF9,LTA,NOS2,SELPLG,SOCS1,SOCS3,STAT1,STAT2,STAT3,STAT4,TNF,VCAM1
IL12B	CCL5,CCR5,CD86,CDKN2D,CEBPD,CSF2,CXCL10,CXCL8,DUSP5,EOMES,ERN1,GZMB,ICAM1,IFNG,IL10,IL12A,IL12B,IL12RB1,IL17F,IL1B,IL22,IL23A,IL4,IL6,INPP5D,IRF9,LTA,MAP3K8,NOS2,PIK3AP1,S100A8,S100A9,SELPLG,SOCS1,SOCS3,STAT1,STAT2,STAT3,STAT4,TGFB1,TNF,VCAM1
IL13	ACE2,ADA,ADAM28,ADAM8,ADAMDEC1,ADAMTS4,ADGRE3,ADORA2A,AIF1,ALOX5AP,ARNTL2,ATF3,BATF,BAX,BCL2A1,BCL2L1,BCL3,BID,BIRC2,BLVRA,C3,C3AR1,CA2,CAPN2,CASP1,CASP3,CASP7,CASP8,CASP9,CCL11,CCL17,CCL18,CCL2,CCL20,CCL22,CCL25,CCL26,CCL3,CCL3L3,CCL4,CCL5,CCL7,CCR5,CD101,CD14,CD163,CD1B,CD1C,CD1E,CD209,CD247,CD37,CD3E,CD4,CD40,CD44,CD48,CD52,CD72,CD80,CD86,CFI,CHCHD7,CHI3L1,CHN2,CHST2,CISH,CLEC10A,CLEC4A,CLEC4E…
IL15	AHR,AKT1,ALDOA,ANXA1,AQP3,ARHGDIB,ATF4,BCL2,BCL2L1,BCL2L11,BPGM,BTG1,CALM1 (includes others),CAMK2D,CASP3,CBLB,CCL11,CCL17,CCL18,CCL19,CCL2,CCL3,CCL4,CCL5,CCND2,CCND3,CCR1,CCR2,CD160,CD2,CD209,CD226,CD244,CD274,CD28,CD33,CD38,CD40,CD40LG,CD44,CD46,CD5,CD53,CD59,CD69,CD74,CD80,CD83,CD84,CD86,CD8A,CD8B,CDKN1A,CEACAM1,CISH,CKS2,CMKLR1,COPB2,CORO1A,COX6C,CPT1A,CSF1,CSF2,CSF3,CTSW,CX3CR1,CXCL10,CXCL2,…
IL17A	ACTB,APBA3,AREG,B2M,BCL2,BCL2A1,BCL2L1,BCL3,C15orf48,C3,CCL11,CCL17,CCL2,CCL20,CCL22,CCL26,CCL27,CCL4,CCL5,CCL7,CCN1,CCR5,CD14,CD163,CD274,CD40,CD68,CD83,CEBPD,COTL1,CRP,CSF2,CSF3,CX3CL1,CXCL1,CXCL10,CXCL13,CXCL2,CXCL3,CXCL5,CXCL6,CXCL8,CXCR4,CYP7B1,DEFB103A/DEFB103B,DEFB4A/DEFB4B,ECHS1,EGR2,ELF3,ENTPD1,FAS,FASLG,FOSL1,GBP2,HBEGF,ICAM1,IFIT1B,IFNG,IFNL1,IL10,IL12A,IL12B,IL12RB2,IL13,IL16,IL17C,IL…
IL17F	CCL2,CCL20,CSF2,CSF3,CX3CL1,CXCL1,CXCL10,CXCL2,CXCL3,CXCL5,CXCL6,CXCL8,CXCR4,ICAM1,IFNG,IL2,IL32,IL6,MMP1,MMP13,MMP3,PTGS2,RUNX2,TGFB1,TNFRSF1B,TRAF3IP2,TRAF6
IL18	ADA2,ADAM19,AQP3,ATF3,BAK1,BCL2,BCL2L1,BSG,CCL11,CCL2,CCL20,CCL3,CCL3L3,CCL4,CCL5,CCR2,CCR4,CCR5,CCR7,CCRL2,CD163,CD226,CD244,CD40,CD40LG,CD44,CD69,CD83,CD86,CFLAR,CSF1,CSF2,CX3CR1,CXCL10,CXCL11,CXCL16,CXCL3,CXCL8,CXCL9,CYSLTR2,DDIT4,ENPP2,FAS,FASLG,FCGR3A/FCGR3B,GADD45B,GADD45G,GIMAP4,GNA15,GZMA,GZMB,GZMH,GZMK,GZMM,HAVCR2,HLX,ICAM1,IDO1,IFNAR1,IFNG,IL10,IL12A,IL12RB1,IL12RB2,IL13,IL18BP,IL18R1,I…
IL1A	ADAMTS1,ADAMTS4,ADORA2A,ALDH1A3,ATF3,BAX,BCL2,BCL2L1,BCL3,BIRC2,BIRC3,BTN3A3,C3,C4A/C4B,CA2,CCL11,CCL2,CCL20,CCL27,CCL3,CCL4,CCL5,CCL8,CCN1,CCR2,CCR6,CD274,CD40,CD44,CD80,CD83,CD86,CDKN1A,CLEC2D,CSF1,CSF2,CSF3,CXCL1,CXCL10,CXCL2,CXCL3,CXCL5,CXCL6,CXCL8,DEFB4A/DEFB4B,DPP4,FAS,FASLG,FOSL1,FTH1,GBP1,GCH1,GNB4,HLA-DRB4,HSD11B1,ICAM1,IER3,IFNG,IFNGR1,IFNGR2,IL10,IL12B,IL13,IL1B,IL1RN,IL2,IL20,IL2RA,IL…
IL1B	ACHE,ACKR1,ACKR2,ACOD1,ADAM12,ADAM8,ADAMTS1,ADAMTS3,ADAMTS4,ADM,AGER,AIF1,AKIP1,AKR1B1,ALPL,ANGPTL4,ANXA1,APOL6,ARL6IP5,ASS1,ATF3,ATF4,ATF5,ATP2A2,B2M,BAX,BCL2,BCL2A1,BCL2L1,BCL3,BDKRB1,BIRC2,BIRC3,BTG2,C1R,C2,C3,C4A/C4B,CALCA,CASP10,CASP3,CASP4,CCL1,CCL11,CCL13,CCL17,CCL2,CCL20,CCL22,CCL27,CCL3,CCL3L1,CCL3L3,CCL4,CCL5,CCL7,CCL8,CCNJ,CCR1,CCR2,CCR5,CCR6,CCR7,CCR8,CCRL2,CD14,CD244,CD274,CD4,CD40,C…
IL2	ABCC1,ACSL6,ADAM19,ADAM8,AHR,ALDOA,ANXA1,APOBEC3G,AREG,ARHGAP25,ARHGDIA,ARHGEF2,ARHGEF3,ARHGEF6,ATF5,AURKA,BATF,BAX,BCAT1,BCCIP,BCL2,BCL2A1,BCL2L1,BHLHE40,BIRC3,C3,CALCA,CAPG,CARD6,CARD9,CASP1,CASP3,CASP4,CBLB,CCL1,CCL11,CCL17,CCL2,CCL22,CCL3,CCL3L1,CCL3L3,CCL4,CCL5,CCND2,CCND3,CCR1,CCR2,CCR3,CCR4,CCR5,CCR6,CCR7,CCR8,CD160,CD2,CD200R1,CD244,CD247,CD274,CD28,CD38,CD3D,CD3G,CD40,CD40LG,CD44,CD46,CD…
IL21	BATF,BCL2,BCL2L1,BCL2L11,BSG,CALHM6,CASP1,CASP3,CCL11,CCL17,CCL20,CCL3L3,CCL4,CCL5,CCND2,CCR7,CCRL2,CD1D,CD2,CD244,CD27,CD28,CD38,CD40LG,CD69,CD86,CDKN1A,CMPK2,CSF2,CXCL10,CXCL13,CXCL8,CXCR3,DPP4,EIF2AK2,EOMES,FASLG,FCER1G,FCGR2B,FGL2,FOXP3,GBP5,GBP6,GZMA,GZMB,HAVCR2,HCST,HERC6,HIF1A,HLA-DRB5,HLX,HSH2D,IDO1,IFI16,IFIT1,IFIT1B,IFIT2,IFIT3,IFNG,IGHG1,IGHG2,IGHG3,IL10,IL12RB2,IL13,IL18R1,IL18RAP,IL2…
IL27	ADGRE1,AHR,APOL1,B2M,BST2,CCL2,CCL20,CCL3,CCL4,CCL5,CCL7,CCND2,CCND3,CCR6,CD14,CD163,CD274,CD38,CD63,CD69,CD74,CD80,CD86,CEBPD,CFLAR,CIITA,CKLF,CR1,CSF2,CTLA4,CX3CL1,CXCL10,CXCL11,CXCL8,CXCL9,DEPP1,EGR2,EIF2AK2,EOMES,FAS,FASLG,FOXP3,GADD45G,GBP2,GZMB,HLA-A,HLA-B,HLA-C,HLA-DMA,HLA-DMB,HLA-DOA,HLA-DOB,HLA-DPA1,HLA-DQA1,HLA-DQB1,HLA-DRA,HLA-E,ICAM1,ICOS,IFNG,IFNL1,IL10,IL10RB,IL12A,IL12B,IL12RB2,IL1…
IL3	ADA,ADGRE1,ADGRE5,AKR1A1,ALOX5AP,APBA2,AREG,ARHGDIB,ARHGEF1,ATF5,BCL2,BCL2L1,BCL2L11,BIRC3,BTG2,C1QA,CALR,CAMKK2,CAPZB,CASP3,CASP9,CBFB,CCL11,CCL17,CCL19,CCL2,CCND2,CCND3,CCR3,CCT5,CD14,CD247,CD3D,CD3G,CD40,CD40LG,CD48,CD53,CD63,CD69,CD80,CD83,CD86,CDKN1A,CEBPZ,CISH,CLEC4C,CPT1A,CREM,CSF1,CSF1R,CSF2,CSF3,CTLA4,CXCL8,CXCL9,CXCR4,DAD1,DOK2,EGR2,EIF1AX,EIF2AK2,EIF3G,EMP3,FAS,FCER2,FCGR2A,FCGR2B,FUS,…
IL33	ACTB,ADAMTS1,ALDH1A3,ALDOA,AREG,ARFGAP3,ARHGAP30,ARHGAP9,ARRB1,ATP10A,ATP5MJ,ATP5MK,ATP8B4,BATF,BATF3,BAX,BCL2A1,BCL2L1,BCL2L11,BCL3,BIRC3,CAMKK2,CASP1,CCL1,CCL11,CCL17,CCL18,CCL2,CCL22,CCL3,CCL3L3,CCL4,CCL5,CCR1,CCR2,CCR4,CD200R1,CD28,CD40,CD53,CD69,CD72,CD80,CD83,CD86,CHST11,CISH,CLEC4A,CLEC4E,CLEC7A,COX7A2,CREM,CSF2,CSF2RB,CSF3R,CSTB,CX3CL1,CXCL1,CXCL10,CXCL16,CXCL2,CXCL3,CXCL8,CXCR2,DEFB4A/DE…
IL36A	CCL20,CD40,CSF2,CSF3,CXCL1,CXCL10,CXCL2,CXCL3,CXCL6,CXCL8,IFNG,IL12A,IL12B,IL17C,IL1B,IL23A,IL36A,IL4,IL6,LCN2,MMP3,MMP9,NFKBIZ,S100A7,S100A8,S100A9,TNF
IL36B	CCL20,CD40,CD80,CD83,CD86,CXCL1,CXCL10,CXCL8,IFNG,IL12A,IL12B,IL1B,IL23A,IL4,IL6,NFKBIZ,TNF
IL36G	CCL20,CD200R1,CD83,CSF2,CSF3,CXCL1,CXCL10,CXCL2,CXCL8,IFNG,IL12A,IL12B,IL22,IL23A,IL4,IL6,MRC1,TNF
IL4	ACOD1,ACOT9,ACP2,ACP5,ACSL4,ACSL6,ACTB,ACTG1,ADAM19,ADAM8,ADAMTS4,ADAP1,ADGRE1,ADORA2A,ADRM1,AGPAT4,AHR,AK2,AKAP13,ALAS1,ALG3,ALOX5,ALOX5AP,ANKRD55,ANXA1,ANXA2,ANXA6,APOO,AREG,ARID5A,ARMC6,ARNTL2,ARSB,ASCC3,ASS1,ATP5MK,B4GALT7,BACE2,BANF1,BATF,BAX,BBX,BCAT1,BCL2,BCL2L1,BCL3,BHLHE40,BIN1,BIRC2,BPGM,C15orf48,C17orf99,C3,C5AR1,CA2,CAPG,CARM1,CASP3,CBFB,CBX3,CCDC86,CCL1,CCL11,CCL13,CCL17,CCL18,CCL2,C…
IL5	ACAA2,ACP5,ALDOA,ANXA2,ANXA6,AREG,ASS1,ATF4,BCL2,BCL2L1,BCL3,BIRC2,CASP4,CCL2,CCL22,CCL3,CCND2,CCND3,CCNH,CCR1,CCR2,CCR3,CCR5,CCR7,CCRL2,CD40,CD40LG,CD5,CD63,CD69,CD79A,CD80,CDC123,CDKN1A,CEACAM1,CFHR2,CIITA,CISD1,CISH,CKAP4,CRELD2,CRIP1,CSF2,CSF2RB,CSF3R,CTSC,CX3CR1,CXCL8,CXCR2,CXCR3,CXCR4,DDX21,DNTTIP2,DUSP5,DUSP6,EAF2,EGR2,EIF4EBP1,ENO1,ERO1A,FAS,FCGR2B,FGL2,GADD45G,GBP2,GBP4,GBP7,GCLM,GK,GLIP…
IL6	ABCC1,ACKR2,ACVRL1,ADAMTS1,ADAMTS4,ADGRE1,ADGRE5,ADM,AHR,AKR1B10,AKT1,ALAS1,ANPEP,ANXA1,AREG,ARL4C,ATF3,ATP2A2,BAK1,BATF,BAX,BCL2,BCL2L1,BCL2L11,BCL3,BMI1,BST2,BTG2,BUB3,C3,C5AR1,CALCA,CAPRIN1,CASP1,CASP3,CASP4,CASP7,CCL11,CCL2,CCL20,CCL3L1,CCL3L3,CCL4,CCL5,CCL7,CCNA1,CCR1,CCR2,CCR3,CCR4,CCR5,CCR6,CCR7,CD14,CD163,CD209,CD274,CD38,CD40,CD44,CD46,CD48,CD53,CD68,CD74,CD79A,CD80,CD83,CD86,CDC6,CDKN1A…
IL7	AHR,BAX,BCL2,BCL2L1,BCL2L11,BLNK,BTLA,CASP3,CBLB,CCL2,CCL3,CCL4,CCND2,CCND3,CD19,CD2,CD247,CD274,CD3D,CD3G,CD69,CD86,CD8A,CD8B,CDKN1A,CEACAM1,CFLAR,CISH,CSF1,CSF2,CXCL1,CXCL2,CXCL3,CXCR4,DARS2,DPP4,DUSP5,E2F3,FAS,FLT3LG,FOXP3,GARS1,GFI1,GSR,HAVCR2,HCST,ICOS,IFNG,IGHM,IL13,IL17F,IL18R1,IL18RAP,IL1R1,IL2,IL21,IL22,IL24,IL2RA,IL4,IL5,IL6,IL7,IL7R,ITGB7,JAK3,KLF2,KLRC4-KLRK1/KLRK1,KLRG1,LEF1,LIF,LTA,…
LTA	CCL19,CCL20,CCL21,CCR4,CD274,CD40,CD44,CD80,CRP,CXCL13,FOXP3,HAS2,IFNG,IL10,IL1B,IL21,IL4,IL5,IL6,ITGA5,ITGB1,ITGB3,JAK2,LTA,NFKB1,NFKB2,ODC1,PDCD1LG2,PDPN,PTGS2,REL,RELB,SELL,TNFRSF11B,VCAM1
MIF	ADGRE1,ATF5,ATG5,ATG7,BAX,BCL2,BCL2L1,BECN1,C3AR1,CCL2,CCL3L3,CCL4,CCR1,CCR4,CCR5,CCR6,CCR8,CD44,CD84,COL4A4,CRP,CXCL10,CXCL16,CXCL2,CXCL3,CXCL8,CXCR1,CXCR4,CXCR6,GFI1,GZMB,HIF1A,ICAM1,IFIT3,IFNG,IL10,IL12A,IL12B,IL13,IL15,IL15RA,IL16,IL17RA,IL1B,IL1R1,IL2,IL20,IL23A,IL23R,IL25,IL2RA,IL4,IL4R,IL5,IL6,IL6ST,IL7,IL7R,IL9R,IRF7,ISG15,ITGA4,JUN,MET,MMP1,MMP13,MMP3,MMP9,NOS2,OAS2,OAS3,OPA1,PTGS2,RETN,…
PF4	BIRC3,CCL18,CCL2,CCL22,CCL3,CCL4,CD1C,CD83,CD86,CDKN1A,CMPK2,CXCL3,CXCL8,DDX58,DDX60,E2F4,EPSTI1,FLI1,GCH1,ICAM1,IFNG,IL12B,IL19,IL1B,IL1RN,IL22,IL23A,IL6,IRF1,ISG15,ITGAM,LY75,NFKB2,NFKBIA,NFKBIZ,RARA,REL,RSAD2,SOD2,SPHK1,STAT1,STAT2,TGFB1,THPO,TNF,TNFAIP3,USP18
PRL	ACTB,ACTR3,ADAR,AEN,ANXA2,ANXA3,ANXA5,AREG,ARF3,ATP2A2,ATP5PD,B2M,BCL2,BCL2L1,BST2,BTG1,CAPN2,CCL2,CCL20,CCND3,CD40,CD69,CDKN1A,CEBPD,CISH,CLU,CMPK2,CNN3,CST3,CTSA,CTSB,CTSH,CTSS,CXCL10,CXCL11,CXCL2,CXCL3,CXCL9,DDX39B,DDX58,DDX60L,DHX58,DTX3L,DUSP4,EIF2AK2,ELOC,ENO1,EPSTI1,FZD2,GMPR,GNA12,HELZ2,HERC5,HERC6,HERPUD1,HIPK3,HNRNPH2,HSPD1,ICAM1,IER3,IFI35,IFI44,IFI44L,IFI6,IFIH1,IFIT1,IFIT3,IFIT5,IFIT…
THPO	ACHE,AURKA,BAX,BCL2L1,BIRC3,CCND2,CCND3,CD44,CISH,CMPK2,CXCL1,DDX58,DDX60,E2F4,EPSTI1,FLI1,GCH1,GP5,HOXB4,ICAM1,IL1B,IL6,IRF1,ISG15,ITGB3,JAK2,KDR,MDM2,MYC,NFKB2,NFKBIA,NFKBIZ,PIM1,RARA,REL,RSAD2,RUNX1,SELP,SH2B3,SOCS3,SOD2,STAT1,STAT2,TAP1,TNF,TNFAIP3,USP18,VEGFA
TNF	AAK1,ABCC1,ABCD2,ACKR2,ACOD1,ACP5,ACSL5,ACTB,ADAM8,ADAMTS4,ADAMTS8,ADM,ADORA2A,ADRB3,AGER,AIMP1,AK2,AKR1B1,AKR1B10,ALDH1A3,ALOX5,ALOX5AP,ANGPTL4,ANKRD55,ANPEP,ANXA1,ANXA11,APBA3,APOBEC3B,APOL1,AQP3,ARF4,ARHGAP18,ARHGAP22,ARHGDIB,ARID5B,ARL6IP5,ASCL2,ASS1,ATF2,ATF3,ATF4,ATP2A2,ATP5PF,B2M,B4GALT1,BAX,BCL10,BCL2,BCL2A1,BCL2L1,BCL2L11,BCL3,BCR,BDKRB1,BDKRB2,BECN1,BHLHE40,BID,BIRC2,BIRC3,BLVRA,BPGM,BS…
TNFSF11	ACOD1,ACP5,ADGRE1,AHR,AIF1,AKAP13,AURKA,BCL2,BCL2A1,BCL2L1,BSG,BST1,C3AR1,CA2,CAPN2,CCL2,CCL3L3,CCL4,CCL5,CCND3,CCR1,CCR4,CD14,CD300LF,CD40,CD44,CD83,CDKN1A,CLEC4E,CSF1R,CSF3,CXCL3,CXCL8,DCSTAMP,DOK2,DUSP16,ECT2,EGR2,EHD1,ETS1,FAS,FERMT3,FGR,FOSL1,FPR1,GADD45B,GCH1,GLRX,GPR68,GRN,HCK,HCLS1,HRH2,ICAM1,IER3,IFNG,IKBKE,IL10,IL12B,IL13,IL13RA1,IL15,IL15RA,IL1B,IL1RN,IL6,IL9,IL9R,IRF4,IRF8,ITGA5,ITGAL…
TNFSF12	ADAM12,ADAM8,BCL2L1,BST1,CCL11,CCL19,CCL2,CCL3,CCL3L3,CCL5,CCR1,CCR5,CD68,CLEC4D,CLEC4E,CSF2,CSF2RA,CXCL10,CXCL2,CXCL3,CXCL6,CXCL8,CYCS,ICAM1,IL1B,IL6,ITGAM,MAP3K14,MMP1,MMP10,MMP12,MMP13,MMP3,MMP9,NCF4,NFKB2,NFKBIA,PTX3,S100A8,S100A9,SELE,SIX1,TIMP1,TNF,TNFRSF12A,TNFSF4,VCAM1
TNFSF13B	ADGRG3,ADORA2A,ARCN1,ASS1,BAK1,BAX,BCAR1,BCL2,BCL2A1,BCL2L1,BCL2L11,BTLA,C2,CCL2,CCL4,CCND2,CCR1,CCR7,CD200,CD274,CD40,CD40LG,CD74,CD80,CD83,CD86,CSF2,CTSS,CXCL6,CXCL8,DUSP5,ECT2,FAS,FCER2,FCGR2B,FFAR2,FGR,FLT3,FOSL1,FPR2,GPR183,GPR55,HAVCR2,HCAR2,HLA-DMB,HLA-DOA,HLA-DQA1,HSH2D,ICAM1,IL10,IL15,IL18RAP,IL1RN,IL2RG,JUN,KLRB1,MALT1,MAP3K14,MCL1,MEFV,MMP9,MYC,NAMPT,NFKB2,PGF,PIM2,PLAUR,PLEK,PLSCR1,PO…
TNFSF14	ADAM8,BCL2L1,BIRC3,CCL19,CCL20,CCL5,CD40,CD86,CSF2,CXCL1,CXCL10,CXCL11,CXCL3,CXCL5,HIF1A,ICAM1,IFNG,IL13,IL6,MMP9,NT5E,TGFB1,TNF,VCAM1
TNFSF15	BIRC3,CCR7,CD40,CD80,CD83,CD86,CSF2,CXCL2,CXCL8,GZMB,IFNG,IL13,IL2,IL22,IL2RA,IL2RB,IL4,IL5,IL6,IL9,MMP9,SPP1,TBX21,TNF
TSLP	ATG5,BECN1,CCL11,CCL17,CCR7,CD40,CD63,CD80,CD83,CD86,CISH,CSF2,CXCL8,CXCL9,ICAM1,IL10,IL12B,IL13,IL2RA,IL32,IL4,IL5,IL6,IL9,JAK1,JAK2,MMP10,MX1,MYC,NFKB1,NME1,SELE,SELL,SELP,STAT6,TGFB1,TIMP1,TNFSF4,VEGFA
