# Supplementary material for: Genomic investigations of unexplained acute hepatitis in children
Source: Nature. 2023 Mar 30;617(7961):564–73. doi: 10.1038/s41586-023-06003-w (PMC10170458; doi:10.1038/s41586-023-06003-w)
Supplement: Supplementary file 14 — Summary statistics for multiple comparisons of cytokine transcriptional modules. Two-tailed unpaired t-tests with Holm Sidak multiple testing correction for adjusted p values were performed. [file 41586_2023_6003_MOESM14_ESM.xlsx]

## Sheet: HBV v Normal
Module	Below threshold?	P value	Mean of HBV	Mean of Normal	Difference	SE of difference	t ratio	df	Adjusted P Value	-log10(adjusted P value)
IL4	Yes	<0.000001	14.74	7.116	7.622	0.4936	15.44	25	<0.000001	11.79
IFNG	Yes	<0.000001	17.73	11.35	6.387	0.6434	9.927	25	<0.000001	7.723
IL2	Yes	<0.000001	13.28	7.981	5.301	0.6397	8.286	25	<0.000001	6.266
IL15	Yes	<0.000001	12.81	8.098	4.714	0.4503	10.47	25	<0.000001	8.183
CD40LG	Yes	<0.000001	12.34	7.824	4.519	0.4991	9.054	25	<0.000001	6.958
TNF	Yes	4.3e-05	15.75	12.37	3.386	0.6851	4.942	25	0.001039	2.983
IFNA2	Yes	<0.000001	10.59	7.927	2.667	0.3915	6.812	25	1.5e-05	4.822
IL33	Yes	4e-06	8.353	5.381	2.972	0.5057	5.877	25	0.000126	3.9
IL1B	Yes	0.001277	12.62	10.43	2.184	0.602	3.629	25	0.015211	1.818
CSF2	Yes	<0.000001	8.833	4.367	4.466	0.4664	9.574	25	<0.000001	7.426
IL6	Yes	0.001174	12.39	10.36	2.03	0.5545	3.662	25	0.015152	1.82
IL21	Yes	<0.000001	4.106	0.495	3.611	0.3319	10.88	25	<0.000001	8.522
IL5	Yes	<0.000001	11.31	8.346	2.967	0.3439	8.628	25	<0.000001	6.576
IL27	Yes	<0.000001	7.47	3.867	3.603	0.4259	8.461	25	<0.000001	6.425
IFNL1	Yes	0.000125	6.428	4.539	1.889	0.4166	4.534	25	0.00249	2.604
IL3	Yes	<0.000001	11.68	7.245	4.44	0.3264	13.6	25	<0.000001	10.57
IL18	Yes	<0.000001	4.541	1.141	3.4	0.3863	8.803	25	<0.000001	6.733
IFNB1	Yes	<0.000001	7.093	4.267	2.826	0.4017	7.034	25	9e-06	5.045
IL7	Yes	1e-05	3.275	1.388	1.887	0.3427	5.506	25	0.000284	3.547
CSF1	Yes	<0.000001	9.41	4.808	4.601	0.3893	11.82	25	<0.000001	9.255
PRL	Yes	7e-06	9.888	7.739	2.15	0.3787	5.677	25	0.00019	3.722
IL1A	No	0.954766	5.621	5.59	0.03044	0.5313	0.0573	25	0.954766	0.0201
IL13	Yes	<0.000001	9.167	3.745	5.422	0.4651	11.66	25	<0.000001	9.143
IL17A	No	0.179675	5.877	5.237	0.6401	0.4637	1.38	25	0.451207	0.3456
TNFSF11	Yes	<0.000001	8.284	5.053	3.231	0.4364	7.404	25	4e-06	5.406
C5	No	0.677047	3.237	3.083	0.1533	0.3637	0.4214	25	0.895702	0.04784
EBI3	Yes	<0.000001	4.739	2.362	2.377	0.2037	11.67	25	<0.000001	9.147
TNFSF13B	Yes	0.000112	4.116	2.323	1.794	0.3921	4.574	25	0.002471	2.607
MIF	Yes	2e-06	3.766	1.906	1.86	0.3014	6.171	25	6.8e-05	4.17
IL12A	Yes	0.000129	1.529	0.6662	0.8633	0.1909	4.521	25	0.00249	2.604
IL12B	Yes	<0.000001	3.989	1.466	2.523	0.2573	9.805	25	<0.000001	7.623
IFNA1	Yes	3e-06	4.11	2.097	2.014	0.3377	5.964	25	0.000104	3.981
IFNA4	Yes	0.000948	1.356	0.2065	1.15	0.3069	3.746	25	0.013193	1.88
IFNE	Yes	<0.000001	3.447	1.808	1.639	0.2223	7.373	25	4e-06	5.384
FLT3LG	Yes	<0.000001	1.318	-0.4843	1.802	0.2283	7.897	25	1e-06	5.893
EDN1	Yes	2.7e-05	6.586	4.7	1.886	0.3683	5.12	25	0.000737	3.132
IL36A	No	0.005311	1.526	0.5662	0.9599	0.3144	3.053	25	0.056898	1.245
CXCL4	No	0.139299	3.69	3.053	0.637	0.4171	1.527	25	0.451207	0.3456
LTA	No	0.094923	0.5388	0.1317	0.4072	0.2346	1.736	25	0.392665	0.406
CCL3	Yes	0.000162	3.473	2.273	1.2	0.2706	4.434	25	0.002907	2.537
TSLP	No	0.00607	2.637	2.026	0.6106	0.2037	2.998	25	0.05907	1.229
IFNL4	Yes	0.000115	2.367	1.078	1.289	0.2823	4.566	25	0.002471	2.607
IL17F	Yes	0.000275	0.7811	-0.5673	1.348	0.3189	4.229	25	0.004385	2.358
TNFSF14	Yes	0.000585	2.451	1.174	1.277	0.3246	3.935	25	0.008739	2.059
IFNK	Yes	4e-06	2.307	1	1.306	0.224	5.832	25	0.000137	3.864
THPO	No	0.061521	3.295	2.781	0.5135	0.2623	1.958	25	0.316799	0.4992
IFNL3	Yes	5e-06	1.054	0.1244	0.9295	0.161	5.773	25	0.000154	3.814
AIMP1	Yes	0.000164	1.254	0.1229	1.131	0.2554	4.429	25	0.002907	2.537
IFNA14	Yes	3.6e-05	1.691	0.2526	1.439	0.2872	5.01	25	0.000908	3.042
TNFSF15	Yes	6.7e-05	-0.01838	-1.076	1.058	0.2215	4.775	25	0.001534	2.814
CCL2	Yes	<0.000001	2.966	0.8593	2.107	0.3263	6.456	25	3.5e-05	4.454
IL36G	No	0.037833	0.3645	-0.2161	0.5806	0.2648	2.193	25	0.236598	0.626
IL36B	No	0.006177	1.241	0.2368	1.004	0.3359	2.991	25	0.05907	1.229
TNFSF12	Yes	3.1e-05	2.823	1.089	1.734	0.3419	5.071	25	0.000807	3.093
IFNA10	No	0.00774	0.9587	0.1503	0.8084	0.2791	2.896	25	0.060269	1.22
IFNW1	Yes	3e-06	0.8014	-0.2736	1.075	0.1777	6.05	25	8.9e-05	4.05
IFNA17	Yes	3e-06	1.089	0.01814	1.071	0.1773	6.042	25	8.9e-05	4.05

## Sheet: AAV2 v Normal
Module	Below threshold?	P value	Mean of AAV2	Mean of Normal	Difference	SE of difference	t ratio	df	Adjusted P Value	-log10(adjusted P value)
IL4	Yes	<0.000001	22.27	7.116	15.15	1.083	13.99	12	<0.000001	6.295
IFNG	Yes	0.000111	18.85	11.35	7.507	1.333	5.631	12	0.002761	2.559
IL2	Yes	0.00019	14.97	7.981	6.992	1.32	5.296	12	0.00399	2.399
IL15	Yes	4.6e-05	14.06	8.098	5.957	0.9614	6.196	12	0.001291	2.889
CD40LG	Yes	0.000182	13.38	7.824	5.551	1.043	5.322	12	0.00399	2.399
TNF	Yes	1e-06	25.58	12.37	13.21	1.469	8.993	12	5.9e-05	4.229
IFNA2	Yes	0.000393	11.41	7.927	3.486	0.7176	4.858	12	0.006795	2.168
IL33	Yes	4.4e-05	11.88	5.381	6.5	1.043	6.234	12	0.001273	2.895
IL1B	Yes	0.00012	17.01	10.43	6.58	1.179	5.58	12	0.002876	2.541
CSF2	Yes	2e-06	12.62	4.367	8.249	0.9532	8.655	12	8.3e-05	4.079
IL6	Yes	0.001999	14.8	10.36	4.438	1.129	3.93	12	0.019808	1.703
IL21	Yes	<0.000001	7.222	0.495	6.727	0.6828	9.851	12	2.4e-05	4.628
IL5	No	0.00818	10.51	8.346	2.169	0.6858	3.163	12	0.055876	1.253
IL27	Yes	0.001444	7.633	3.867	3.766	0.9161	4.111	12	0.015767	1.802
IFNL1	Yes	1.6e-05	9.784	4.539	5.245	0.7554	6.943	12	0.00059	3.229
IL3	Yes	9e-06	12.36	7.245	5.114	0.6968	7.34	12	0.000384	3.415
IL18	Yes	7e-06	7.342	1.141	6.201	0.8237	7.529	12	0.000327	3.485
IFNB1	Yes	1.3e-05	9.718	4.267	5.451	0.7698	7.08	12	0.000513	3.29
IL7	Yes	2.2e-05	6.311	1.388	4.922	0.7346	6.7	12	0.000768	3.115
CSF1	Yes	2e-06	11.65	4.808	6.845	0.7844	8.726	12	7.8e-05	4.108
PRL	Yes	8e-06	12.45	7.739	4.711	0.6353	7.415	12	0.000365	3.438
IL1A	No	0.105136	7.531	5.59	1.94	1.107	1.753	12	0.105136	0.9782
IL13	Yes	2.1e-05	9.607	3.745	5.862	0.8693	6.744	12	0.000742	3.129
IL17A	No	0.052661	7.256	5.237	2.019	0.9391	2.15	12	0.102549	0.9891
TNFSF11	Yes	0.000379	9.387	5.053	4.334	0.8882	4.88	12	0.006795	2.168
C5	No	0.011709	5.377	3.083	2.294	0.7724	2.97	12	0.062611	1.203
EBI3	Yes	1e-06	6.144	2.362	3.782	0.4283	8.831	12	7e-05	4.154
TNFSF13B	Yes	4.2e-05	7.557	2.323	5.235	0.8374	6.251	12	0.001273	2.895
MIF	Yes	2.5e-05	5.944	1.906	4.038	0.6118	6.6	12	0.000837	3.077
IL12A	Yes	9e-06	3.517	0.6662	2.85	0.3874	7.358	12	0.000384	3.415
IL12B	Yes	0.000163	4.269	1.466	2.802	0.5202	5.387	12	0.003752	2.426
IFNA1	Yes	2.3e-05	6.103	2.097	4.007	0.6013	6.663	12	0.000788	3.104
IFNA4	Yes	9e-06	4.667	0.2065	4.46	0.6061	7.36	12	0.000384	3.415
IFNE	Yes	2e-06	5.223	1.808	3.415	0.3989	8.56	12	9.2e-05	4.039
FLT3LG	Yes	<0.000001	4.792	-0.4843	5.276	0.4545	11.61	12	4e-06	5.392
EDN1	Yes	3e-05	9.402	4.7	4.702	0.7247	6.489	12	0.000955	3.02
IL36A	No	0.029773	2.207	0.5662	1.641	0.6658	2.465	12	0.086686	1.062
CXCL4	Yes	0.000742	6.807	3.053	3.754	0.8363	4.488	12	0.010335	1.986
LTA	Yes	5e-06	3.979	0.1317	3.848	0.4895	7.86	12	0.000216	3.665
CCL3	No	0.017318	3.857	2.273	1.584	0.5742	2.759	12	0.067491	1.171
TSLP	Yes	0.000392	4.089	2.026	2.062	0.4244	4.859	12	0.006795	2.168
IFNL4	Yes	3.3e-05	4.091	1.078	3.013	0.4695	6.417	12	0.001028	2.988
IL17F	Yes	9.7e-05	3.305	-0.5673	3.872	0.678	5.711	12	0.002528	2.597
TNFSF14	Yes	0.005206	3.553	1.174	2.379	0.6984	3.407	12	0.041772	1.379
IFNK	Yes	1.4e-05	4.064	1	3.064	0.4352	7.042	12	0.000528	3.278
THPO	Yes	8e-06	6.437	2.781	3.656	0.4899	7.461	12	0.00035	3.455
IFNL3	Yes	<0.000001	3.136	0.1244	3.012	0.3072	9.805	12	2.4e-05	4.613
AIMP1	Yes	0.000301	2.781	0.1229	2.659	0.53	5.016	12	0.005705	2.244
IFNA14	Yes	1.6e-05	3.818	0.2526	3.565	0.5163	6.906	12	0.000605	3.218
TNFSF15	Yes	6.5e-05	1.654	-1.076	2.73	0.4571	5.974	12	0.001747	2.758
CCL2	Yes	0.000891	3.84	0.8593	2.981	0.6799	4.384	12	0.011517	1.939
IL36G	Yes	0.00473	1.704	-0.2161	1.92	0.5552	3.459	12	0.041772	1.379
IL36B	No	0.010718	2.356	0.2368	2.119	0.7024	3.017	12	0.062611	1.203
TNFSF12	Yes	0.000189	4.977	1.089	3.888	0.7341	5.296	12	0.00399	2.399
IFNA10	Yes	0.00039	2.799	0.1503	2.649	0.5447	4.863	12	0.006795	2.168
IFNW1	Yes	<0.000001	3.317	-0.2736	3.591	0.3619	9.923	12	2.2e-05	4.654
IFNA17	Yes	1e-06	3.216	0.01814	3.198	0.3542	9.03	12	5.8e-05	4.24

## Sheet: AAV2 v HBV
Module	Below threshold?	P value	Mean of HBV	Mean of Normal	Difference	SE of difference	t ratio	df	Adjusted P Value	-log10(adjusted P value)
IL4	Yes	<0.000001	14.74	7.116	7.622	0.4936	15.44	25	<0.000001	11.79
IFNG	Yes	<0.000001	17.73	11.35	6.387	0.6434	9.927	25	<0.000001	7.723
IL2	Yes	<0.000001	13.28	7.981	5.301	0.6397	8.286	25	<0.000001	6.266
IL15	Yes	<0.000001	12.81	8.098	4.714	0.4503	10.47	25	<0.000001	8.183
CD40LG	Yes	<0.000001	12.34	7.824	4.519	0.4991	9.054	25	<0.000001	6.958
TNF	Yes	4.3e-05	15.75	12.37	3.386	0.6851	4.942	25	0.001039	2.983
IFNA2	Yes	<0.000001	10.59	7.927	2.667	0.3915	6.812	25	1.5e-05	4.822
IL33	Yes	4e-06	8.353	5.381	2.972	0.5057	5.877	25	0.000126	3.9
IL1B	Yes	0.001277	12.62	10.43	2.184	0.602	3.629	25	0.015211	1.818
CSF2	Yes	<0.000001	8.833	4.367	4.466	0.4664	9.574	25	<0.000001	7.426
IL6	Yes	0.001174	12.39	10.36	2.03	0.5545	3.662	25	0.015152	1.82
IL21	Yes	<0.000001	4.106	0.495	3.611	0.3319	10.88	25	<0.000001	8.522
IL5	Yes	<0.000001	11.31	8.346	2.967	0.3439	8.628	25	<0.000001	6.576
IL27	Yes	<0.000001	7.47	3.867	3.603	0.4259	8.461	25	<0.000001	6.425
IFNL1	Yes	0.000125	6.428	4.539	1.889	0.4166	4.534	25	0.00249	2.604
IL3	Yes	<0.000001	11.68	7.245	4.44	0.3264	13.6	25	<0.000001	10.57
IL18	Yes	<0.000001	4.541	1.141	3.4	0.3863	8.803	25	<0.000001	6.733
IFNB1	Yes	<0.000001	7.093	4.267	2.826	0.4017	7.034	25	9e-06	5.045
IL7	Yes	1e-05	3.275	1.388	1.887	0.3427	5.506	25	0.000284	3.547
CSF1	Yes	<0.000001	9.41	4.808	4.601	0.3893	11.82	25	<0.000001	9.255
PRL	Yes	7e-06	9.888	7.739	2.15	0.3787	5.677	25	0.00019	3.722
IL1A	No	0.954766	5.621	5.59	0.03044	0.5313	0.0573	25	0.954766	0.0201
IL13	Yes	<0.000001	9.167	3.745	5.422	0.4651	11.66	25	<0.000001	9.143
IL17A	No	0.179675	5.877	5.237	0.6401	0.4637	1.38	25	0.451207	0.3456
TNFSF11	Yes	<0.000001	8.284	5.053	3.231	0.4364	7.404	25	4e-06	5.406
C5	No	0.677047	3.237	3.083	0.1533	0.3637	0.4214	25	0.895702	0.04784
EBI3	Yes	<0.000001	4.739	2.362	2.377	0.2037	11.67	25	<0.000001	9.147
TNFSF13B	Yes	0.000112	4.116	2.323	1.794	0.3921	4.574	25	0.002471	2.607
MIF	Yes	2e-06	3.766	1.906	1.86	0.3014	6.171	25	6.8e-05	4.17
IL12A	Yes	0.000129	1.529	0.6662	0.8633	0.1909	4.521	25	0.00249	2.604
IL12B	Yes	<0.000001	3.989	1.466	2.523	0.2573	9.805	25	<0.000001	7.623
IFNA1	Yes	3e-06	4.11	2.097	2.014	0.3377	5.964	25	0.000104	3.981
IFNA4	Yes	0.000948	1.356	0.2065	1.15	0.3069	3.746	25	0.013193	1.88
IFNE	Yes	<0.000001	3.447	1.808	1.639	0.2223	7.373	25	4e-06	5.384
FLT3LG	Yes	<0.000001	1.318	-0.4843	1.802	0.2283	7.897	25	1e-06	5.893
EDN1	Yes	2.7e-05	6.586	4.7	1.886	0.3683	5.12	25	0.000737	3.132
IL36A	No	0.005311	1.526	0.5662	0.9599	0.3144	3.053	25	0.056898	1.245
CXCL4	No	0.139299	3.69	3.053	0.637	0.4171	1.527	25	0.451207	0.3456
LTA	No	0.094923	0.5388	0.1317	0.4072	0.2346	1.736	25	0.392665	0.406
CCL3	Yes	0.000162	3.473	2.273	1.2	0.2706	4.434	25	0.002907	2.537
TSLP	No	0.00607	2.637	2.026	0.6106	0.2037	2.998	25	0.05907	1.229
IFNL4	Yes	0.000115	2.367	1.078	1.289	0.2823	4.566	25	0.002471	2.607
IL17F	Yes	0.000275	0.7811	-0.5673	1.348	0.3189	4.229	25	0.004385	2.358
TNFSF14	Yes	0.000585	2.451	1.174	1.277	0.3246	3.935	25	0.008739	2.059
IFNK	Yes	4e-06	2.307	1	1.306	0.224	5.832	25	0.000137	3.864
THPO	No	0.061521	3.295	2.781	0.5135	0.2623	1.958	25	0.316799	0.4992
IFNL3	Yes	5e-06	1.054	0.1244	0.9295	0.161	5.773	25	0.000154	3.814
AIMP1	Yes	0.000164	1.254	0.1229	1.131	0.2554	4.429	25	0.002907	2.537
IFNA14	Yes	3.6e-05	1.691	0.2526	1.439	0.2872	5.01	25	0.000908	3.042
TNFSF15	Yes	6.7e-05	-0.01838	-1.076	1.058	0.2215	4.775	25	0.001534	2.814
CCL2	Yes	<0.000001	2.966	0.8593	2.107	0.3263	6.456	25	3.5e-05	4.454
IL36G	No	0.037833	0.3645	-0.2161	0.5806	0.2648	2.193	25	0.236598	0.626
IL36B	No	0.006177	1.241	0.2368	1.004	0.3359	2.991	25	0.05907	1.229
TNFSF12	Yes	3.1e-05	2.823	1.089	1.734	0.3419	5.071	25	0.000807	3.093
IFNA10	No	0.00774	0.9587	0.1503	0.8084	0.2791	2.896	25	0.060269	1.22
IFNW1	Yes	3e-06	0.8014	-0.2736	1.075	0.1777	6.05	25	8.9e-05	4.05
IFNA17	Yes	3e-06	1.089	0.01814	1.071	0.1773	6.042	25	8.9e-05	4.05
