# Supplementary material for: Genomic investigations of unexplained acute hepatitis in children
Source: Nature. 2023 Mar 30;617(7961):564–73. doi: 10.1038/s41586-023-06003-w (PMC10170458; doi:10.1038/s41586-023-06003-w)
Supplement: Supplementary file 15 — List of differentially expressed proteins between 5 cases and 7 controls. The p-values were calculated by applying two-tailed empirical Bayes moderated t-statistics on protein-wise linear models. P values were not adjusted for multiple comparisons. [file 41586_2023_6003_MOESM15_ESM.xlsx]

## Sheet: up
Protein_IDs	Majority_protein_IDs	Protein_names	Gene_names	case_vs_control_ratio	case_vs_control_p.val	case_vs_control_p.adj
P27449	P27449	V-type proton ATPase 16 kDa proteolipid subunit	ATP6V0C	11.5	1.82985e-10	1.56e-05
G3V3G2;G3V535;A0A087WYI2	G3V3G2;G3V535;A0A087WYI2		EVL	7.51	2.22899e-10	2.15e-05
P22894;H7C1M3	P22894;H7C1M3	Neutrophil collagenase	MMP8	6.92	1.12472e-09	0.000459
sp|A056675|abysis_56675;sp|A057061|abysis_57061;sp|A023210|abysis_23210;sp|A056017|abysis_56017	sp|A056675|abysis_56675;sp|A057061|abysis_57061;sp|A023210|abysis_23210;sp|A056017|abysis_56017			5.7	4.64473e-09	0.00267
sp|A008553|abysis_8553;sp|A008605|abysis_8605;sp|A008601|abysis_8601;sp|A008512|abysis_8512;sp|A040082|abysis_40082;sp|A061283|abysis_61283;sp|A037720|abysis_37720;sp|A037721|abysis_37721;sp|A010284|abysis_10284;sp|A010286|abysis_10286;sp|A010289|abysis_10289;sp|A010291|abysis_10291;sp|A005031|abysis_5031;sp|A084456|abysis_84456;sp|A007331|abysis_7331;sp|A039944|abysis_39944;sp|A009446|abysis_944…	sp|A008553|abysis_8553;sp|A008605|abysis_8605;sp|A008601|abysis_8601;sp|A008512|abysis_8512			9.89	6.00304e-09	0.00337
sp|A043522|abysis_43522;sp|A043790|abysis_43790;sp|A047689|abysis_47689;sp|A073509|abysis_73509;sp|A066716|abysis_66716;sp|A066682|abysis_66682;sp|A042394|abysis_42394;sp|A042424|abysis_42424;sp|A076582|abysis_76582;sp|A066570|abysis_66570;sp|A076623|abysis_76623;sp|A041553|abysis_41553;sp|A005521|abysis_5521;sp|A033931|abysis_33931;sp|A076535|abysis_76535;sp|A066630|abysis_66630;sp|A020055|abysi…	sp|A043522|abysis_43522;sp|A043790|abysis_43790;sp|A047689|abysis_47689;sp|A073509|abysis_73509;sp|A066716|abysis_66716;sp|A066682|abysis_66682;sp|A042394|abysis_42394;sp|A042424|abysis_42424;sp|A076582|abysis_76582;sp|A066570|abysis_66570;sp|A076623|abysis_76623;sp|A041553|abysis_41553;sp|A005521|abysis_5521;sp|A033931|abysis_33931;sp|A076535|abysis_76535;sp|A066630|abysis_66630;sp|A020055|abysi…		IGHV3-74	8.13	1.44446e-08	0.00742
sp|A043323|abysis_43323;sp|A037355|abysis_37355;sp|A015734|abysis_15734;sp|A014855|abysis_14855	sp|A043323|abysis_43323			8.29	4.90561e-08	0.0226
P21854;A0A6E1WA84;Q5T4Q8;Q5T4Q7	P21854;A0A6E1WA84	B-cell differentiation antigen CD72	CD72	5.48	4.99466e-08	0.0229
M0R2B7;P28340;A0A087WYJ2;A0A2R8Y705;M0QZR8;A0A2R8Y7K6;M0QXE6;M0QXQ2;M0R3H8	M0R2B7;P28340;A0A087WYJ2;A0A2R8Y705;M0QZR8;A0A2R8Y7K6	DNA polymerase;DNA polymerase delta catalytic subunit	POLD1	5.03	6.57104e-08	0.0277
A0A3B3ITK0;P35442;A0A7I2YQT6;A0A7I2V585;A0A7I2YQ86;A0A7I2V344;Q5RI53	A0A3B3ITK0;P35442;A0A7I2YQT6;A0A7I2V585;A0A7I2YQ86	Thrombospondin-2	THBS2	7.92	7.18954e-08	0.0293
sp|A008541|abysis_8541;sp|A049259|abysis_49259;sp|A031437|abysis_31437;sp|A040320|abysis_40320;sp|A015149|abysis_15149;sp|A031436|abysis_31436;sp|A075038|abysis_75038;sp|A077020|abysis_77020;sp|A076465|abysis_76465;sp|A010809|abysis_10809;sp|A075483|abysis_75483;sp|A075472|abysis_75472;sp|A075860|abysis_75860;sp|A010306|abysis_10306;sp|A075428|abysis_75428;sp|A075481|abysis_75481;sp|A066798|abysi…	sp|A008541|abysis_8541			6.24	7.4354e-08	0.0299
Q9HCU0	Q9HCU0	Endosialin	CD248	4.56	8.44982e-08	0.0328
X5D2U9;A0A0G2JJQ8;P13762	X5D2U9;A0A0G2JJQ8;P13762	HLA class II histocompatibility antigen, DR beta 4 chain	HLA-DRB4	7.59	8.47755e-08	0.0329
sp|A013715|abysis_13715	sp|A013715|abysis_13715			5.09	9.003e-08	0.0344
P60201;B1B1G3;B1B1G4;B1B1G6;B1B1G1;B1B1G2	P60201;B1B1G3;B1B1G4;B1B1G6	Myelin proteolipid protein	PLP1	8.72	1.04877e-07	0.0382
sp|A007953|abysis_7953;sp|A007957|abysis_7957	sp|A007953|abysis_7953;sp|A007957|abysis_7957			5.83	1.21597e-07	0.0421
Q96A72;F5H6N1;F5H124	Q96A72;F5H6N1	Protein mago nashi homolog 2	MAGOHB	6.25	1.41015e-07	0.0465
Q16143;G4Y816	Q16143;G4Y816	Beta-synuclein	SNCB	6.16	1.50619e-07	0.0485
O75791;B1AH86	O75791;B1AH86	GRB2-related adapter protein 2	GRAP2	5.76	1.61413e-07	0.0506
Q9HC16	Q9HC16	DNA dC->dU-editing enzyme APOBEC-3G	APOBEC3G	5.28	2.60493e-07	0.067
Q8WXI4	Q8WXI4	Acyl-coenzyme A thioesterase 11	ACOT11	3.88	2.94252e-07	0.0723
Q8NET5;F8WE95	Q8NET5;F8WE95	NFAT activation molecule 1	NFAM1	5.54	3.41351e-07	0.0789
sp|A081263|abysis_81263;sp|A055106|abysis_55106;sp|A019291|abysis_19291;sp|A038823|abysis_38823;sp|A044081|abysis_44081;sp|A018797|abysis_18797;sp|A012647|abysis_12647;sp|A050285|abysis_50285;sp|A032938|abysis_32938	sp|A081263|abysis_81263			6.25	3.51595e-07	0.0803
Q8ND23	Q8ND23	Leucine-rich repeat-containing protein 16B	LRRC16B	6.44	3.76142e-07	0.0834
sp|A008446|abysis_8446;sp|A021871|abysis_21871;sp|A050883|abysis_50883;sp|A005299|abysis_5299;sp|A069382|abysis_69382;sp|A063888|abysis_63888;sp|A010006|abysis_10006;sp|A071642|abysis_71642;sp|A078872|abysis_78872;sp|A071643|abysis_71643;sp|A002195|abysis_2195;sp|A015176|abysis_15176;sp|A010005|abysis_10005;sp|A049242|abysis_49242;sp|A084557|abysis_84557;sp|A009123|abysis_9123;sp|A015197|abysis_1…	sp|A008446|abysis_8446			7.48	4.79185e-07	0.0947
Q63HM9	Q63HM9	PI-PLC X domain-containing protein 3	PLCXD3	7.75	4.94532e-07	0.0962
P11413;E7EUI8;E7EM57;E9PD92	P11413;E7EUI8;E7EM57;E9PD92	Glucose-6-phosphate 1-dehydrogenase	G6PD	3.09	5.80937e-07	0.106
B7Z1Z5;Q9P121;F6WFR7;F8W8Y1;F8VTR5	B7Z1Z5;Q9P121;F6WFR7;F8W8Y1;F8VTR5	Neurotrimin	NTM	4.42	5.88542e-07	0.106
Q8NHU6	Q8NHU6	Tudor domain-containing protein 7	TDRD7	9.1	6.82875e-07	0.115
H3BVD9;O43278;H3BTQ8;H3BSM2;H3BR01;H3BMB6;H3BNW5	H3BVD9;O43278;H3BTQ8;H3BSM2	Kunitz-type protease inhibitor 1	SPINT1	4.58	7.44315e-07	0.12
A0A494C0X7;P05107;D3DSM0;J3KNI6;E7EVZ9;E5RK25;E5RIG7;E5RHE6;E5RK54	A0A494C0X7;P05107;D3DSM0	Integrin beta-2;Integrin beta	ITGB2	3.48	7.56288e-07	0.121
Q8TCU6	Q8TCU6	Phosphatidylinositol 3,4,5-trisphosphate-dependent Rac exchanger 1 protein	PREX1	3.76	7.7144e-07	0.123
P08243;F8WEJ5;C9J057;C9JT45;C9JM09;C9JLN6	P08243;F8WEJ5	Asparagine synthetase [glutamine-hydrolyzing]	ASNS	6.04	8.10285e-07	0.126
Q01469;I6L8B7	Q01469;I6L8B7	Fatty acid-binding protein, epidermal	FABP5	4.25	8.42476e-07	0.128
Q8WVX9;E9PNW8	Q8WVX9;E9PNW8	Fatty acyl-CoA reductase 1	FAR1	5	8.51391e-07	0.129
Q86SK9	Q86SK9	Stearoyl-CoA desaturase 5	SCD5	5.47	8.74076e-07	0.13
P06493;A0A024QZP7;E5RIU6	P06493;A0A024QZP7;E5RIU6	Cyclin-dependent kinase 1	CDK1;CDC2	6.11	8.79739e-07	0.131
sp|A079869|abysis_79869;sp|A083876|abysis_83876;sp|A036108|abysis_36108;sp|A023438|abysis_23438	sp|A079869|abysis_79869			4.46	8.8734e-07	0.131
Q8IV20;A0A0D9SEW6;A2A3Z5	Q8IV20	Laccase domain-containing protein 1	LACC1	5.99	9.48348e-07	0.135
P33992;B1AHB1;B1AHA9;B1AHB2	P33992;B1AHB1	DNA replication licensing factor MCM5;DNA helicase	MCM5	5.14	9.71542e-07	0.137
G3V207;Q9ULS5;F8VQF2	G3V207;Q9ULS5	Transmembrane and coiled-coil domains protein 3	TMCC3	5.52	1.16735e-06	0.148
A0A499FJK2;P01137;A0A7I2YQL8;A0A7I2V5Z9	A0A499FJK2;P01137;A0A7I2YQL8;A0A7I2V5Z9	Transforming growth factor beta-1;Latency-associated peptide	TGFB1	5.64	1.24156e-06	0.151
sp|A008954|abysis_8954	sp|A008954|abysis_8954			6.09	1.34679e-06	0.157
O00329;F8W9P4	O00329;F8W9P4	Phosphatidylinositol 4,5-bisphosphate 3-kinase catalytic subunit delta isoform	PIK3CD	4.92	1.38493e-06	0.158
E7EQW0;B7ZLE8;A0A0G2JS53;Q13075;A0A0G2JNC7;A0A0G2JQE0;H0YAX2;E5RJA3	E7EQW0;B7ZLE8;A0A0G2JS53;Q13075;A0A0G2JNC7;A0A0G2JQE0	Baculoviral IAP repeat-containing protein 1	NAIP	4.33	1.38928e-06	0.159
P07996;A8MZG1	P07996	Thrombospondin-1	THBS1	3.35	1.43168e-06	0.161
Q8TF42	Q8TF42	Ubiquitin-associated and SH3 domain-containing protein B	UBASH3B	4.58	1.46421e-06	0.162
P53004;C9J1E1	P53004	Biliverdin reductase A	BLVRA	3.17	1.53455e-06	0.165
P21462	P21462	fMet-Leu-Phe receptor	FPR1	5.09	1.54407e-06	0.166
P04920;A0A7I2V5T6;C9J722;C9J035;C9J9M9;C9JVC2;C9J459;H7C1Z2;F8WD49;P48751;REV__A0A182DWH4	P04920;A0A7I2V5T6	Anion exchange protein 2	SLC4A2	6.32	1.64721e-06	0.17
A0A5F9ZHM4;P07195;A0A3B3IS95;A8MW50;C9J7H8;F5H793;Q9BYZ2	A0A5F9ZHM4;P07195;A0A3B3IS95;A8MW50;C9J7H8	L-lactate dehydrogenase B chain;L-lactate dehydrogenase	LDHB	3.25	1.69309e-06	0.172
Q9BYC5;A0A669KAW1	Q9BYC5;A0A669KAW1	Alpha-(1,6)-fucosyltransferase	FUT8	4.48	1.75047e-06	0.174
B7ZC38;Q9NR46;B7ZC39;F8WFB9;G5E9J1;H7C1Z6	B7ZC38;Q9NR46;B7ZC39	Endophilin-B2	SH3GLB2	3.78	1.77324e-06	0.175
P18031;B4DSN5	P18031;B4DSN5	Tyrosine-protein phosphatase non-receptor type 1;Tyrosine-protein phosphatase non-receptor type	PTPN1	2.91	1.8878e-06	0.179
P28039;A0A087WVT3;C9JJA7	P28039;A0A087WVT3	Acyloxyacyl hydrolase;Acyloxyacyl hydrolase small subunit;Acyloxyacyl hydrolase large subunit	AOAH	4.95	2.02279e-06	0.183
P13612;E7EP60	P13612;E7EP60	Integrin alpha-4	ITGA4	4.73	2.06493e-06	0.184
Q01813;A0A7I2V3Z0;B1APP6;Q5VSR5;H0Y757;V9GYV7;A0A7I2V5S1;V9GY25;H0Y3Y3	Q01813;A0A7I2V3Z0;B1APP6	ATP-dependent 6-phosphofructokinase, platelet type	PFKP	4.11	2.16248e-06	0.187
sp|A008877|abysis_8877;sp|A008704|abysis_8704;sp|A033114|abysis_33114;sp|A008703|abysis_8703;sp|A040983|abysis_40983;sp|A052819|abysis_52819;sp|A076195|abysis_76195;sp|A076932|abysis_76932;sp|A076022|abysis_76022;sp|A003531|abysis_3531;sp|A075478|abysis_75478;sp|A075158|abysis_75158;sp|A008960|abysis_8960;sp|A075832|abysis_75832;sp|A050437|abysis_50437;sp|A045526|abysis_45526;sp|A016101|abysis_16…	sp|A008877|abysis_8877;sp|A008704|abysis_8704			5.94	2.1923e-06	0.188
H0YE88;P28347;E9PKB7;H0YEJ9	H0YE88;P28347;E9PKB7;H0YEJ9	Transcriptional enhancer factor TEF-1	TEAD1	4.34	2.2232e-06	0.189
sp|A007999|abysis_7999;sp|A016205|abysis_16205;sp|A033396|abysis_33396;sp|A033126|abysis_33126;sp|A033416|abysis_33416;sp|A032792|abysis_32792;sp|A050615|abysis_50615;sp|A050175|abysis_50175;sp|A050594|abysis_50594;sp|A050628|abysis_50628;sp|A050515|abysis_50515;sp|A050190|abysis_50190;sp|A050713|abysis_50713;sp|A050183|abysis_50183	sp|A007999|abysis_7999;sp|A016205|abysis_16205			7.13	2.30443e-06	0.191
Q13231;D6REY1	Q13231;D6REY1	Chitotriosidase-1	CHIT1	4.21	2.38143e-06	0.193
O14907;A0A087X282	O14907	Tax1-binding protein 3	TAX1BP3	4.32	2.39929e-06	0.194
P25774;A0A7P0TAQ0;A0A7P0T904;A0A7P0T844;A0A804DAZ0;A0A7P0T8U1;U3KQE7;A0A7P0T8H4;U3KPS4;A0A7P0T8A1;A0A7P0T7Z6	P25774;A0A7P0TAQ0;A0A7P0T904;A0A7P0T844;A0A804DAZ0;A0A7P0T8U1;U3KQE7;A0A7P0T8H4;U3KPS4	Cathepsin S	CTSS	2.93	2.4153e-06	0.194
H0YFY6;K4DIE0	H0YFY6		NUMA1	4.27	2.42298e-06	0.194
P32942;K7ERN2;K7EQC7;K7EP52	P32942;K7ERN2	Intercellular adhesion molecule 3	ICAM3	5.24	2.45449e-06	0.195
A0A087WVM4;B7ZM99;Q6UB35;H0Y327;Q4VXM0;Q5JYA8;Q5JYA3;Q4VXM1	A0A087WVM4;B7ZM99;Q6UB35	Monofunctional C1-tetrahydrofolate synthase, mitochondrial	MTHFD1L	5.07	2.85436e-06	0.204
O00391;A8MXT8;H0Y5Z8	O00391	Sulfhydryl oxidase 1	QSOX1	5.85	3.00343e-06	0.207
Q5K651;C9JKF1	Q5K651;C9JKF1	Sterile alpha motif domain-containing protein 9	SAMD9	3.39	3.21452e-06	0.211
P0C7P4	P0C7P4	Putative cytochrome b-c1 complex subunit Rieske-like protein 1	UQCRFS1P1	6.16	3.46257e-06	0.218
O15511;B1ALC0	O15511;B1ALC0	Actin-related protein 2/3 complex subunit 5	ARPC5	3.15	3.69659e-06	0.223
P24821;E9PC84	P24821;E9PC84	Tenascin	TNC	3.47	3.71023e-06	0.223
sp|A024253|abysis_24253;sp|A029395|abysis_29395;sp|A050237|abysis_50237;sp|A028036|abysis_28036;sp|A025080|abysis_25080;sp|A024767|abysis_24767;sp|A029506|abysis_29506;sp|A048023|abysis_48023;sp|A055989|abysis_55989;sp|A046986|abysis_46986;sp|A030462|abysis_30462;sp|A036471|abysis_36471;sp|A056997|abysis_56997;sp|A086350|abysis_86350;sp|A000504|abysis_504;sp|A028190|abysis_28190;sp|A028248|abysis…	sp|A024253|abysis_24253			4.77	4.16507e-06	0.233
P40199;M0QYM2	P40199	Carcinoembryonic antigen-related cell adhesion molecule 6	CEACAM6	4.48	4.36257e-06	0.238
P36222;H0Y3U8	P36222	Chitinase-3-like protein 1	CHI3L1	4.98	4.5333e-06	0.242
Q8WUH2	Q8WUH2	Transforming growth factor-beta receptor-associated protein 1	TGFBRAP1	2.97	4.72275e-06	0.246
sp|A086494|abysis_86494	sp|A086494|abysis_86494			5.53	4.97004e-06	0.251
P14618;B4DNK4	P14618;B4DNK4	Pyruvate kinase PKM;Pyruvate kinase	PKM	3.17	4.9964e-06	0.251
Q5JUW8;Q92796	Q5JUW8;Q92796	Disks large homolog 3	DLG3	5.03	5.14376e-06	0.254
P32322;E2QRB3;J3KQ22;J3QL24;J3QKT4;J3QR88;J3QLK9;J3QL32;J3KTA8;J3QKT3;J3QRZ0;J3QL23	P32322;E2QRB3;J3KQ22	Pyrroline-5-carboxylate reductase 1, mitochondrial;Pyrroline-5-carboxylate reductase	PYCR1	7.02	5.33976e-06	0.258
E9PEJ6;H0Y547;P98196;H0Y8F0;A2A3G9	E9PEJ6;H0Y547;P98196	Phospholipid-transporting ATPase;Probable phospholipid-transporting ATPase IH	ATP11A	4.49	5.41581e-06	0.259
sp|A087602|abysis_87602;sp|A009606|abysis_9606;sp|A015415|abysis_15415;sp|A002859|abysis_2859;sp|A015391|abysis_15391;sp|A015403|abysis_15403;sp|A015401|abysis_15401;sp|A058251|abysis_58251;sp|A015392|abysis_15392;sp|A015412|abysis_15412;sp|A023930|abysis_23930;sp|A072620|abysis_72620;sp|A005125|abysis_5125;sp|A007215|abysis_7215;sp|A006155|abysis_6155;sp|A087662|abysis_87662;sp|A082233|abysis_82…	sp|A087602|abysis_87602;sp|A009606|abysis_9606			4.57	5.81838e-06	0.266
P20718;A0A0C4DGJ9	P20718;A0A0C4DGJ9	Granzyme H	GZMH	5.46	6.04096e-06	0.27
P23381;G3V3Y5;G3V3H8;G3V277;G3V456;G3V5U1;G3V423;G3V227;G3V3P2;G3V3X0;G3V2Y7;G3V3S7;G3V5W1;G3V4N8;G3V4C7;H0YJP3;G3V2C0;G3V339;G3V313;G3V4S4;G3V4N0;G3V3R3;G3V2F2;P78534;G3V4Q0;G3V4A3;G3V5H5	P23381	Tryptophan--tRNA ligase, cytoplasmic;T1-TrpRS;T2-TrpRS	WARS	3.02	6.484e-06	0.277
F8W930;Q9Y6M1	F8W930;Q9Y6M1	Insulin-like growth factor 2 mRNA-binding protein 2	IGF2BP2	4.95	6.82573e-06	0.283
Q9P107;K7EJC2;K7ELE8	Q9P107	GEM-interacting protein	GMIP	3.23	7.18864e-06	0.288
V9GYM8;A0A5F9ZI21;Q92974;V9GZ14;V9GYF5;V9GYG5;V9GZ58	V9GYM8;A0A5F9ZI21;Q92974	Rho guanine nucleotide exchange factor 2	ARHGEF2	3.09	7.63242e-06	0.294
Q5HYJ3;F5GX09;F5H5F4	Q5HYJ3;F5GX09	Protein FAM76B	FAM76B	6.1	7.68829e-06	0.294
Q08945;E9PMD4;A0A0U1RRK2;E9PPZ7	Q08945	FACT complex subunit SSRP1	SSRP1	2.38	7.87635e-06	0.297
P09769;Q5TGY6	P09769;Q5TGY6	Tyrosine-protein kinase Fgr	FGR	4.85	8.86456e-06	0.309
A8MTM1;E9PQ63	A8MTM1;E9PQ63		CBR1	4.6	8.912e-06	0.309
P54687;F5H2F2;A0A087WYF2	P54687	Branched-chain-amino-acid aminotransferase, cytosolic	BCAT1	4.86	9.03423e-06	0.311
Q8IV04;E9PSB7	Q8IV04	Carabin	TBC1D10C	5.33	9.36838e-06	0.314
Q96RQ9;M0QYW8	Q96RQ9	L-amino-acid oxidase	IL4I1	5.63	9.40585e-06	0.315
P14151	P14151	L-selectin	SELL	3.86	9.79397e-06	0.319
sp|A034829|abysis_34829;sp|A045123|abysis_45123	sp|A034829|abysis_34829;sp|A045123|abysis_45123			5.15	9.95652e-06	0.32
Q9BZG1;C9JBG0;C9JY26;Q96PJ7;E7ES60;K7EIF2;H7C0Y7;J3QLC6;V9GY61;K7EJW7	Q9BZG1;C9JBG0;C9JY26;Q96PJ7;E7ES60	Ras-related protein Rab-34	RAB34	6.33	1.00987e-05	0.322
P19367;B1AR62	P19367	Hexokinase-1	HK1	3.91	1.01798e-05	0.322
P56279;G3V4T4	P56279;G3V4T4	T-cell leukemia/lymphoma protein 1A	TCL1A	6.05	1.05032e-05	0.325
Q9BPW9	Q9BPW9	Dehydrogenase/reductase SDR family member 9	DHRS9	4.64	1.0836e-05	0.329
P11169	P11169	Solute carrier family 2, facilitated glucose transporter member 3	SLC2A3	5.46	1.10417e-05	0.33
Q16798;E9PMB9;Q6TCH8;E9PNN2	Q16798;E9PMB9	NADP-dependent malic enzyme, mitochondrial;Malic enzyme	ME3	4.6	1.14794e-05	0.334
P55058	P55058	Phospholipid transfer protein	PLTP	3.96	1.16279e-05	0.335
sp|A009640|abysis_9640;sp|A009632|abysis_9632;sp|A004960|abysis_4960;sp|A079866|abysis_79866;sp|A036887|abysis_36887;sp|A018429|abysis_18429;sp|A013664|abysis_13664;sp|A013635|abysis_13635;sp|A006148|abysis_6148;sp|A006121|abysis_6121;sp|A006090|abysis_6090;sp|A031071|abysis_31071;sp|A019532|abysis_19532;sp|A021767|abysis_21767;sp|A004958|abysis_4958;sp|A004957|abysis_4957;sp|A004954|abysis_4954;…	sp|A009640|abysis_9640;sp|A009632|abysis_9632			4.99	1.17663e-05	0.337
P15498;F5H5P4;Q96D37;A0A0A0MR07	P15498;F5H5P4;Q96D37;A0A0A0MR07	Proto-oncogene vav	VAV1	3.96	1.1929e-05	0.338
Q9NPP4;A0A499FIV7;A0A494BZZ1	Q9NPP4;A0A499FIV7;A0A494BZZ1	NLR family CARD domain-containing protein 4	NLRC4	4.19	1.25193e-05	0.343
Q96PP8;E7ETN8	Q96PP8;E7ETN8	Guanylate-binding protein 5	GBP5	3.79	1.31263e-05	0.347
P12429;D6RFG5;D6RCA8;D6RAZ8	P12429	Annexin A3	ANXA3	4.25	1.34812e-05	0.35
A0A3B3IT31;Q9NUN5;A0A3B3IRS7;A0A3B3IU68;A0A3F2YP66;A0A3B3ITP2;A0A494C126	A0A3B3IT31;Q9NUN5;A0A3B3IRS7;A0A3B3IU68;A0A3F2YP66;A0A3B3ITP2	Probable lysosomal cobalamin transporter	LMBRD1	4.23	1.35693e-05	0.35
Q9Y2T2;H0YBM0	Q9Y2T2	AP-3 complex subunit mu-1	AP3M1	2.64	1.38223e-05	0.352
Q9H4G4;Q5VZR0;A0A087WUM5;A0A088AWP7	Q9H4G4;Q5VZR0	Golgi-associated plant pathogenesis-related protein 1	GLIPR2	3.95	1.40378e-05	0.353
O75563;C9JQ17	O75563	Src kinase-associated phosphoprotein 2	SKAP2	2.7	1.4041e-05	0.353
P20591;A0A7P0T9I6;F8W8T1;H9KVC7	P20591;A0A7P0T9I6;F8W8T1;H9KVC7	Interferon-induced GTP-binding protein Mx1;Interferon-induced GTP-binding protein Mx1, N-terminally processed	MX1	3.36	1.4377e-05	0.356
A0A7I2V5D0;A0A7I2V490;P26358;A0A7I2YQA8;A0A7I2V5F1;A0A7I2YQQ0;A0A7I2V5F6;K7ENW7;A0A7I2V2G5;K7EJL0;K7EMU8;A0A7I2V3F8;K7EIZ6	A0A7I2V5D0;A0A7I2V490;P26358;A0A7I2YQA8;A0A7I2V5F1;A0A7I2YQQ0;A0A7I2V5F6	DNA (cytosine-5)-methyltransferase 1	DNMT1	3.98	1.51036e-05	0.36
Q13938	Q13938	Calcyphosin	CAPS	5.98	1.55392e-05	0.363
C9JST2;A0A0G2JM43;A0A0G2JM38;A0A0G2JP25;A0A0G2JPX5;A0A0A0MS20;A0A0G2JNL1;Q8NHJ6;A8MUE1;A0A0G2JPA9;A0A0G2JPI0	C9JST2;A0A0G2JM43;A0A0G2JM38;A0A0G2JP25;A0A0G2JPX5;A0A0A0MS20;A0A0G2JNL1;Q8NHJ6;A8MUE1;A0A0G2JPA9	Leukocyte immunoglobulin-like receptor subfamily B member 4	LILRB4	3.94	1.57522e-05	0.364
sp|A033330|abysis_33330	sp|A033330|abysis_33330			9.53	1.59979e-05	0.366
P27361;E9PQW4;E9PBK7;E9PJF0;B3KR49;H0YEX6;E9PRH7;H0YDH9	P27361;E9PQW4;E9PBK7;E9PJF0;B3KR49	Mitogen-activated protein kinase 3;Mitogen-activated protein kinase	MAPK3	4.27	1.6405e-05	0.368
P19878;B1ALB7;B1ALB6	P19878	Neutrophil cytosol factor 2	NCF2	3.67	1.65027e-05	0.369
sp|A008469|abysis_8469;sp|A008520|abysis_8520;sp|A051193|abysis_51193;sp|A032937|abysis_32937;sp|A035082|abysis_35082;sp|A035089|abysis_35089;sp|A049764|abysis_49764;sp|A031204|abysis_31204;sp|A060364|abysis_60364;sp|A086260|abysis_86260;sp|A065906|abysis_65906;sp|A056322|abysis_56322;sp|A065251|abysis_65251;sp|A032548|abysis_32548;sp|A019548|abysis_19548;sp|A019547|abysis_19547;sp|A053424|abysis…	sp|A008469|abysis_8469;sp|A008520|abysis_8520			2.87	1.65925e-05	0.369
CON__P08727	CON__P08727			4.82	1.67094e-05	0.37
Q9BQ75;C9J384;H7C515	Q9BQ75;C9J384	Protein CMSS1	CMSS1	5.58	1.69543e-05	0.371
H0YKZ9;H0YLT0;Q8WW43	H0YKZ9;H0YLT0;Q8WW43	Gamma-secretase subunit APH-1B	APH1B	4.82	1.70925e-05	0.372
M0R2P6;Q8TBC3;M0R0S1;M0R2U6;M0QZF2;M0R204;M0QXA4;M0QYJ9;M0R0S2;M0QZF4	M0R2P6;Q8TBC3;M0R0S1	SH3KBP1-binding protein 1	SHKBP1	3.79	1.75079e-05	0.374
Q9Y5Y6	Q9Y5Y6	Suppressor of tumorigenicity 14 protein	ST14	4.02	1.75587e-05	0.375
A0A087WWU8;D6R904;A0A494C0G0;Q5VU61	A0A087WWU8		TPM3	2.94	1.76241e-05	0.375
H3BN02;P20702;Q13349	H3BN02;P20702	Integrin alpha-X	ITGAX	3.41	1.83953e-05	0.379
A0A0D5XQ77;Q29967;A0A0U5Q247;A0A140T9Z9;A0A140T9Y4;A0A140T981;A0A140T9V6;A0A140T911	A0A0D5XQ77;Q29967;A0A0U5Q247;A0A140T9Z9;A0A140T9Y4;A0A140T981		HLA-DQB1	4.87	1.84505e-05	0.38
E9PG19;O94868;E7ENZ2;C9JM66;H0YG35;B8ZZW8;H0Y6M2	E9PG19;O94868;E7ENZ2	F-BAR and double SH3 domains protein 2	FCHSD2	3.24	1.87568e-05	0.381
P09758	P09758	Tumor-associated calcium signal transducer 2	TACSTD2	6.28	1.91272e-05	0.383
P48595	P48595	Serpin B10	SERPINB10	5.79	1.93995e-05	0.385
sp|A037264|abysis_37264	sp|A037264|abysis_37264			4.55	2.07603e-05	0.392
O75746;F8W9J0;H0YFB2;B4DGK6	O75746	Calcium-binding mitochondrial carrier protein Aralar1	SLC25A12	3.25	2.11819e-05	0.394
P21333;A0A7P0NMY4;A0A087WWY3;A0A7I2V3E6;H0Y5C6;H0Y5F3;H7C2E7;A0A669KBC6	P21333;A0A7P0NMY4	Filamin-A	FLNA	2.63	2.14644e-05	0.395
P04233;E7EQJ3;H0YBZ8;H0YBZ2	P04233	HLA class II histocompatibility antigen gamma chain	CD74	3.8	2.14867e-05	0.395
sp|A043262|abysis_43262;sp|A023180|abysis_23180;sp|A021759|abysis_21759;sp|A069913|abysis_69913	sp|A043262|abysis_43262			5	2.21644e-05	0.398
sp|A053491|abysis_53491;sp|A004949|abysis_4949;sp|A005073|abysis_5073;sp|A005070|abysis_5070;sp|A005069|abysis_5069;sp|A005068|abysis_5068;sp|A005075|abysis_5075;sp|A004943|abysis_4943;sp|A013343|abysis_13343;sp|A069206|abysis_69206;sp|A006020|abysis_6020;sp|A002052|abysis_2052;sp|A006133|abysis_6133;sp|A013634|abysis_13634;sp|A013649|abysis_13649;sp|A002051|abysis_2051;sp|A063541|abysis_63541;sp…	sp|A053491|abysis_53491			4.25	2.26311e-05	0.4
Q96PP9	Q96PP9	Guanylate-binding protein 4	GBP4	3.59	2.32857e-05	0.403
P05164;J3QSF7	P05164	Myeloperoxidase;Myeloperoxidase;89 kDa myeloperoxidase;84 kDa myeloperoxidase;Myeloperoxidase light chain;Myeloperoxidase heavy chain	MPO	4.92	2.37083e-05	0.405
O75367;A0A8I5KRC6;B4DJC3;D6RCF2	O75367;A0A8I5KRC6;B4DJC3	Core histone macro-H2A.1;Histone H2A	H2AFY	2.97	2.37247e-05	0.405
B1AQ74;Q6NSI4	B1AQ74;Q6NSI4	Uncharacterized protein CXorf57	CXorf57	10.8	2.37919e-05	0.405
sp|A037044|abysis_37044	sp|A037044|abysis_37044			7.64	2.40284e-05	0.406
Q13308;H0Y8F1;C9JQR6;Q86X91;F8WDG7;C9J9E8;H7C5L0	Q13308	Inactive tyrosine-protein kinase 7	PTK7	5.07	2.45038e-05	0.408
P02747	P02747	Complement C1q subcomponent subunit C	C1QC	4.67	2.47561e-05	0.409
sp|A034261|abysis_34261	sp|A034261|abysis_34261			3.6	2.49846e-05	0.41
Q2VPB7	Q2VPB7	AP-5 complex subunit beta-1	AP5B1	3.47	2.60363e-05	0.414
Q15645;H0YAL2	Q15645	Pachytene checkpoint protein 2 homolog	TRIP13	4.64	2.61976e-05	0.415
Q9Y657;Q5JUX0	Q9Y657	Spindlin-1	SPIN1	2.88	2.74063e-05	0.419
Q13303;A0A590UJB6;A0A5F9UN28;Q5TG84;A0A590UJY1;Q5TG81;Q5TG78;A0A590UJU4;C9JQ60;Q14722;A0A590UJB8;C9JBV8;A0A087X1P8;A0A590UJ72;B7Z8E5;A0A590UJI8;A0A590UJ15	Q13303;A0A590UJB6;A0A5F9UN28	Voltage-gated potassium channel subunit beta-2	KCNAB2	4.9	2.75017e-05	0.419
Q06187;Q5JY90	Q06187;Q5JY90	Tyrosine-protein kinase BTK	BTK	4.41	2.82909e-05	0.422
sp|A083143|abysis_83143;sp|A086011|abysis_86011;sp|A085242|abysis_85242;sp|A083259|abysis_83259	sp|A083143|abysis_83143;sp|A086011|abysis_86011;sp|A085242|abysis_85242;sp|A083259|abysis_83259			4.72	2.86922e-05	0.424
P54652;REV__H0Y7I1;REV__H0Y6T5;REV__H0Y4F5;REV__H0Y314	P54652	Heat shock-related 70 kDa protein 2	HSPA2	3.42	2.95178e-05	0.426
A2BFX2;A0A5S8K7D1	A2BFX2;A0A5S8K7D1		HLA-DRB1	4.93	2.97186e-05	0.427
P16035;B4DFW2	P16035	Metalloproteinase inhibitor 2	TIMP2	4.09	2.97318e-05	0.427
P02533;CON__P02533;K7ENV3	P02533;CON__P02533	Keratin, type I cytoskeletal 14	KRT14	3.67	3.04469e-05	0.429
G3XAP6;P49747;CON__ENSEMBL:ENSBTAP00000006074	G3XAP6;P49747;CON__ENSEMBL:ENSBTAP00000006074	Cartilage oligomeric matrix protein	COMP	4.25	3.21592e-05	0.434
O00182;J3QS92;J3KS82;J3KSA0	O00182	Galectin-9	LGALS9	3.42	3.26741e-05	0.436
sp|A009651|abysis_9651;sp|A072719|abysis_72719;sp|A080989|abysis_80989;sp|A020482|abysis_20482;sp|A081145|abysis_81145;sp|A012973|abysis_12973;sp|A082704|abysis_82704;sp|A006747|abysis_6747;sp|A007930|abysis_7930;sp|A015472|abysis_15472;sp|A015475|abysis_15475;sp|A015498|abysis_15498;sp|A015514|abysis_15514;sp|A002251|abysis_2251;sp|A007435|abysis_7435;sp|A012446|abysis_12446;sp|A085969|abysis_85…	sp|A009651|abysis_9651			4.53	3.28052e-05	0.436
sp|A043165|abysis_43165;A0A5H1ZRQ7;A0M8Q6;sp|A009583|abysis_9583;sp|A019508|abysis_19508;sp|A006076|abysis_6076	sp|A043165|abysis_43165;A0A5H1ZRQ7;A0M8Q6;sp|A009583|abysis_9583	Ig lambda-7 chain C region	IGLC7	5.99	3.32574e-05	0.438
O95716;M0R257	O95716	Ras-related protein Rab-3D	RAB3D	5.64	3.38719e-05	0.439
P23469;S4R2Y5;S4R448;Q5VWH6;Q5VWH5	P23469;S4R2Y5	Receptor-type tyrosine-protein phosphatase epsilon;Protein-tyrosine-phosphatase	PTPRE	4.98	3.4407e-05	0.441
sp|A028884|abysis_28884;sp|A041656|abysis_41656;sp|A028678|abysis_28678;sp|A028299|abysis_28299;sp|A029598|abysis_29598	sp|A028884|abysis_28884;sp|A041656|abysis_41656;sp|A028678|abysis_28678;sp|A028299|abysis_28299;sp|A029598|abysis_29598			6.6	3.47728e-05	0.442
Q86UV5;A0A0A0MRS6;E9PJH5;E9PRY5;E9PJ93	Q86UV5	Ubiquitin carboxyl-terminal hydrolase 48	USP48	3.05	3.60718e-05	0.445
I3L4Y1;Q12979;A0A1C7CYZ0;A0A0G2JQ41;B7Z683;I3L2P5;I3L3W0;A0A0G2JRJ1;A0A0G2JQB5;I3L1U8;I3L379;I3NI05;A0A0G2JQT5;I3L0R7;A0A0D9SGD7;I3L2L3;I3L259;A0A0G2JSE0	I3L4Y1;Q12979;A0A1C7CYZ0;A0A0G2JQ41;B7Z683	Active breakpoint cluster region-related protein	ABR	4.77	3.68378e-05	0.448
P41218;H0Y6P3	P41218	Myeloid cell nuclear differentiation antigen	MNDA	3.15	3.82248e-05	0.452
P32456	P32456	Interferon-induced guanylate-binding protein 2	GBP2	4.82	3.83503e-05	0.452
P50453	P50453	Serpin B9	SERPINB9	3.3	3.83803e-05	0.452
P02745;X6RLJ0	P02745;X6RLJ0	Complement C1q subcomponent subunit A	C1QA	3.42	3.9096e-05	0.454
Q9GZN7;K7ERP1;K7EPN1;K7EL91;K7EMJ5	Q9GZN7;K7ERP1;K7EPN1	Protein rogdi homolog	ROGDI	3.32	3.91395e-05	0.454
P17813;F5GX88	P17813;F5GX88	Endoglin	ENG	3.2	4.02691e-05	0.458
O95544;A0A0A0MR98;J3KTI3;J3KSP9	O95544;A0A0A0MR98	NAD kinase	NADK	3.13	4.1471e-05	0.461
P14780	P14780	Matrix metalloproteinase-9;67 kDa matrix metalloproteinase-9;82 kDa matrix metalloproteinase-9	MMP9	3.69	4.22001e-05	0.463
Q15052	Q15052	Rho guanine nucleotide exchange factor 6	ARHGEF6	2.54	4.33215e-05	0.465
O15400	O15400	Syntaxin-7	STX7	2.45	4.39165e-05	0.467
A0A590UKD3	A0A590UKD3			3.37	4.49441e-05	0.469
sp|A008752|abysis_8752;sp|A084172|abysis_84172;sp|A044615|abysis_44615;sp|A014574|abysis_14574;sp|A083992|abysis_83992;sp|A034988|abysis_34988;sp|A083135|abysis_83135;sp|A004280|abysis_4280;sp|A006193|abysis_6193;sp|A080983|abysis_80983;sp|A037669|abysis_37669;sp|A087598|abysis_87598	sp|A008752|abysis_8752			4.71	4.49749e-05	0.469
sp|A008453|abysis_8453;sp|A008476|abysis_8476;sp|A082653|abysis_82653;sp|A059688|abysis_59688;sp|A059827|abysis_59827;sp|A083004|abysis_83004;sp|A060336|abysis_60336;sp|A060357|abysis_60357;sp|A083857|abysis_83857;sp|A018815|abysis_18815;sp|A056816|abysis_56816;sp|A056114|abysis_56114;sp|A007934|abysis_7934;sp|A047864|abysis_47864;sp|A056298|abysis_56298;sp|A046905|abysis_46905;sp|A020518|abysis_…	sp|A008453|abysis_8453;sp|A008476|abysis_8476			4.61	4.52305e-05	0.47
P52790;H0Y8U9	P52790	Hexokinase-3	HK3	2.98	4.64492e-05	0.473
sp|A057173|abysis_57173;sp|A031079|abysis_31079;sp|A057155|abysis_57155;sp|A060339|abysis_60339;sp|A009861|abysis_9861;sp|A009819|abysis_9819;sp|A009930|abysis_9930;sp|A021436|abysis_21436;sp|A023671|abysis_23671;sp|A059311|abysis_59311;sp|A055799|abysis_55799;sp|A035956|abysis_35956;sp|A035952|abysis_35952;sp|A059284|abysis_59284;sp|A069326|abysis_69326	sp|A057173|abysis_57173;sp|A031079|abysis_31079;sp|A057155|abysis_57155;sp|A060339|abysis_60339;sp|A009861|abysis_9861;sp|A009819|abysis_9819;sp|A009930|abysis_9930;sp|A021436|abysis_21436;sp|A023671|abysis_23671;sp|A059311|abysis_59311;sp|A055799|abysis_55799;sp|A035956|abysis_35956;sp|A035952|abysis_35952			7.03	4.82787e-05	0.477
B5MCD7;O43759;A2A283;F8WCE4	B5MCD7;O43759;A2A283;F8WCE4	Synaptogyrin-1	SYNGR1	6.77	4.84868e-05	0.477
P42224;A0A669KB68;A0A669KB56;A0A669KBA4;A0A669KB53;A0A669KBI6;J3KPM9;A0A669KB52;A0A669KB75;E7EPD2;A0A669KB17;D2KFR9;E7ENM1;Q67C41;A0A669KBK4	P42224;A0A669KB68;A0A669KB56;A0A669KBA4;A0A669KB53;A0A669KBI6;J3KPM9;A0A669KB52;A0A669KB75;E7EPD2	Signal transducer and activator of transcription 1-alpha/beta;Signal transducer and activator of transcription	STAT1	2.16	4.87061e-05	0.478
Q99983	Q99983	Osteomodulin	OMD	5.64	4.94827e-05	0.48
G3V2A3	G3V2A3		TUBB3	3.64	5.04724e-05	0.482
P16403	P16403	Histone H1.2	HIST1H1C	2.48	5.18467e-05	0.485
Q8IVG5	Q8IVG5	Sterile alpha motif domain-containing protein 9-like	SAMD9L	4.38	5.24122e-05	0.486
O43639;E7EPF5;E9PEE2;E7ERP6	O43639	Cytoplasmic protein NCK2	NCK2	3.81	5.24386e-05	0.486
O15439;A0A2R8YDC1	O15439	Multidrug resistance-associated protein 4	ABCC4	3.69	5.35431e-05	0.488
Q7Z4H3;V9GYS5;V9GZ04	Q7Z4H3;V9GYS5;V9GZ04	HD domain-containing protein 2	HDDC2	2.91	5.36327e-05	0.488
C9JC87;O00189;C9JWL4;C9IZL5;C9JMG3;H7BZV3;H7C0A0;F8WDR3;F8WCC5;F8WCR6	C9JC87;O00189;C9JWL4;C9IZL5;C9JMG3	AP-4 complex subunit mu-1	AP4M1	4.13	5.55966e-05	0.492
D6RDV0;D6RA37;A0A0A0MTC2;D6RIY7;Q13454	D6RDV0;D6RA37;A0A0A0MTC2;D6RIY7;Q13454	Tumor suppressor candidate 3	TUSC3	4.21	5.60898e-05	0.493
O75718;C9JP16	O75718;C9JP16	Cartilage-associated protein	CRTAP	2.83	5.61566e-05	0.493
P05109	P05109	Protein S100-A8;Protein S100-A8, N-terminally processed	S100A8	4.3	5.65297e-05	0.494
Q9GZY8;C9JHF5;C9JU19;C9JI76;E9PPR7;E9PK16;C9JAF1	Q9GZY8	Mitochondrial fission factor	MFF	2.61	5.67037e-05	0.494
Q96L50;G3V5H2	Q96L50;G3V5H2	Leucine-rich repeat protein 1	LRR1	9.2	5.7897e-05	0.496
P52815	P52815	39S ribosomal protein L12, mitochondrial	MRPL12	6.78	5.90427e-05	0.498
Q8IWF6;H7C598;H7C5D0	Q8IWF6	Protein DENND6A	DENND6A	4	6.01505e-05	0.5
Q9NRW3;F8WB92	Q9NRW3	DNA dC->dU-editing enzyme APOBEC-3C	APOBEC3C	4.43	6.02526e-05	0.5
Q9BS40;H7C5A4	Q9BS40	Latexin	LXN	4.51	6.10331e-05	0.502
Q03518;A0A140T9T7;A0A2R8Y4Y0	Q03518;A0A140T9T7;A0A2R8Y4Y0	Antigen peptide transporter 1	TAP1	2.51	6.32494e-05	0.506
O95994;H7C3Z9;H7C040;B5MC62;B5MC07;Q8TD06	O95994;H7C3Z9;H7C040;B5MC62;B5MC07;Q8TD06	Anterior gradient protein 2 homolog;Anterior gradient protein 3 homolog	AGR2;AGR3	4.42	6.36134e-05	0.506
Q86V21;E7EW25	Q86V21	Acetoacetyl-CoA synthetase	AACS	4.04	6.47459e-05	0.508
O75925;H3BSI8;B4DGW0	O75925	E3 SUMO-protein ligase PIAS1	PIAS1	3.25	6.50102e-05	0.509
Q96BS2;E9PQ58	Q96BS2;E9PQ58	Calcineurin B homologous protein 3	TESC	3.45	6.55398e-05	0.51
B1AHL2	B1AHL2	Fibulin-1	FBLN1	2.96	6.72246e-05	0.513
Q5H9A7;P01033;Q5H9B5;H0Y789;Q5H9B4	Q5H9A7;P01033	Metalloproteinase inhibitor 1	TIMP1	7.1	6.7535e-05	0.513
P56377;A0A5F9ZI43;H7BZG6;H0Y673;A0A5F9ZHX2;A6NH01;A0A5F9ZHW1	P56377;A0A5F9ZI43;H7BZG6;H0Y673;A0A5F9ZHX2;A6NH01;A0A5F9ZHW1	AP-1 complex subunit sigma-2	AP1S2	3.68	6.86077e-05	0.515
F8W1T6;Q15434;A0A1W2PQV1;F8VQS9;F8VV01;F5H5C8	F8W1T6;Q15434	RNA-binding motif, single-stranded-interacting protein 2	RBMS2	4.31	6.86407e-05	0.515
sp|A009053|abysis_9053;sp|A044003|abysis_44003	sp|A009053|abysis_9053;sp|A044003|abysis_44003			3.93	6.96784e-05	0.517
A0A0A0MQW0;A0A0A0MR39;Q9P2K5;A0A087WUT0;H0YN19;H0YKS1;A0A0C4DGV1	A0A0A0MQW0;A0A0A0MR39;Q9P2K5;A0A087WUT0;H0YN19	Myelin expression factor 2	MYEF2	4.97	7.0753e-05	0.518
Q8NBM8;E7EVZ5;D6R9J0	Q8NBM8;E7EVZ5	Prenylcysteine oxidase-like	PCYOX1L	5.3	7.10464e-05	0.519
O00299	O00299	Chloride intracellular channel protein 1	CLIC1	2.26	7.23841e-05	0.521
Q9Y426;H7BZB0	Q9Y426	C2 domain-containing protein 2	C2CD2	6.75	7.3006e-05	0.522
H7BY57;A0A7P0Z4R6;D6RBU5;D6RHX4;H7C0L6	H7BY57;A0A7P0Z4R6		NFASC	3.71	7.31485e-05	0.522
Q6PIU2;A0A0A0MTJ9;H7C046;F8WE33	Q6PIU2;A0A0A0MTJ9;H7C046	Neutral cholesterol ester hydrolase 1	NCEH1	3.01	7.35503e-05	0.523
O94927;K7EQ61	O94927	HAUS augmin-like complex subunit 5	HAUS5	2.79	7.36901e-05	0.523
Q96DU3	Q96DU3	SLAM family member 6	SLAMF6	4.45	7.53708e-05	0.525
A0A7I2YQU3;A0A7I2V403;Q68DK2;A0A7I2YQV0;G3V2D8;A0A7I2V4E6;A0A7I2V577;G3V230;E7ER42;E7ESB3;REV__Q8N6N2;H7C1W0;REV__A6NH11;A0A2H2FF08;Q96L15;Q13508	A0A7I2YQU3;A0A7I2V403;Q68DK2;A0A7I2YQV0;G3V2D8	Zinc finger FYVE domain-containing protein 26	ZFYVE26	3.18	7.69628e-05	0.528
A0A087WW77;Q15334	A0A087WW77;Q15334	Lethal(2) giant larvae protein homolog 1	LLGL1	3.57	7.71038e-05	0.528
A0A087X295;Q9NNW5;E9PDU5;E9PBK6;C9K020;E5RFX3;F8WE36;C9JFP6;V9GYU1	A0A087X295;Q9NNW5;E9PDU5;E9PBK6	WD repeat-containing protein 6	WDR6	3.53	7.71246e-05	0.528
P32455;A0A7P0TAZ1;F6X827;F6SPX6;H3BRX6;H3BP53;REV__CON__Q3TTY5	P32455	Interferon-induced guanylate-binding protein 1	GBP1	2.62	7.73308e-05	0.528
Q9NYH9;J3KRR8;J3QSA7	Q9NYH9	U3 small nucleolar RNA-associated protein 6 homolog	UTP6	3.21	7.81183e-05	0.529
sp|A008501|abysis_8501;sp|A071526|abysis_71526;sp|A023442|abysis_23442;sp|A004903|abysis_4903;sp|A023801|abysis_23801;sp|A012457|abysis_12457;sp|A039939|abysis_39939;sp|A004902|abysis_4902;sp|A005040|abysis_5040;sp|A020112|abysis_20112;sp|A005034|abysis_5034;sp|A012455|abysis_12455;sp|A005032|abysis_5032;sp|A004887|abysis_4887;sp|A005035|abysis_5035;sp|A005045|abysis_5045;sp|A004914|abysis_4914;s…	sp|A008501|abysis_8501			6.1	8.056e-05	0.533
Q9BUL8;C9J5C3;C9J6F3;C9J363;H7C5M9;C9JSA3;C9JND6;C9J932;F8WDF3	Q9BUL8;C9J5C3;C9J6F3;C9J363;H7C5M9;C9JSA3;C9JND6	Programmed cell death protein 10	PDCD10	2.65	8.10281e-05	0.533
P55285;D6RF86	P55285;D6RF86	Cadherin-6	CDH6	4.09	8.11162e-05	0.533
sp|A000407|abysis_407;sp|A056191|abysis_56191;sp|A060308|abysis_60308;sp|A046632|abysis_46632;sp|A021041|abysis_21041;sp|A023580|abysis_23580;sp|A069896|abysis_69896;sp|A017081|abysis_17081;sp|A018590|abysis_18590;sp|A069468|abysis_69468;sp|A009011|abysis_9011;sp|A056894|abysis_56894;sp|A069814|abysis_69814;sp|A084385|abysis_84385;sp|A056202|abysis_56202;sp|A018594|abysis_18594;sp|A000408|abysis_…	sp|A000407|abysis_407;sp|A056191|abysis_56191;sp|A060308|abysis_60308;sp|A046632|abysis_46632;sp|A021041|abysis_21041;sp|A023580|abysis_23580;sp|A069896|abysis_69896;sp|A017081|abysis_17081;sp|A018590|abysis_18590;sp|A069468|abysis_69468;sp|A009011|abysis_9011;sp|A056894|abysis_56894;sp|A069814|abysis_69814;sp|A084385|abysis_84385;sp|A056202|abysis_56202;sp|A018594|abysis_18594;sp|A000408|abysis_…			7.2	8.2276e-05	0.535
P08246	P08246	Neutrophil elastase	ELANE	7.8	8.43574e-05	0.538
Q9UNA1;A0A2R8YGB3;A0A2R8Y5C0;A0A2R8YDK5;H0Y4P9;H0Y835;C9J6V4;H7BZZ0;H7C3P8;H7C1J1	Q9UNA1;A0A2R8YGB3	Rho GTPase-activating protein 26	ARHGAP26	4	8.49316e-05	0.538
P53355;F8WCQ3	P53355	Death-associated protein kinase 1	DAPK1	3.81	8.50752e-05	0.539
Q5VV42	Q5VV42	Threonylcarbamoyladenosine tRNA methylthiotransferase	CDKAL1	3.36	8.64572e-05	0.54
P06239;Q573B4;E9PAP0;E9PJ92;F8W6B9;E9PKQ8	P06239;Q573B4;E9PAP0;E9PJ92	Tyrosine-protein kinase Lck;Non-specific protein-tyrosine kinase	LCK	3.76	8.7107e-05	0.541
CON__Q3KNV1;P08729	CON__Q3KNV1;P08729	Keratin, type II cytoskeletal 7	KRT7	4.28	8.80101e-05	0.542
Q9NWZ5;Q5JWV1	Q9NWZ5	Uridine-cytidine kinase-like 1	UCKL1	2.86	8.87386e-05	0.543
A0A1B0GVI3;CON__P13645;P13645;CON__Q7Z3Y8	A0A1B0GVI3;CON__P13645;P13645	Keratin, type I cytoskeletal 10	KRT10	2.59	8.95167e-05	0.544
O14526;M0QZI3;A0A0C3SFZ9;M0R1K4;M0R3E5;M0QY09;M0QZI9;M0QXD1;M0R3E7;M0QXY1;M0QYT8;M0QZS1;M0QXW2;M0R107;M0R2J7;M0QZF0;M0QYA9;M0QZE1	O14526;M0QZI3;A0A0C3SFZ9;M0R1K4;M0R3E5	F-BAR domain only protein 1	FCHO1	3.43	8.96372e-05	0.544
Q15642;M0R2H7	Q15642;M0R2H7	Cdc42-interacting protein 4	TRIP10	2.7	9.54952e-05	0.551
Q6ZT21	Q6ZT21	Transmembrane protein with metallophosphoesterase domain	TMPPE	4.16	9.56112e-05	0.551
Q9ULZ3;H3BP42	Q9ULZ3	Apoptosis-associated speck-like protein containing a CARD	PYCARD	2.36	9.60335e-05	0.552
H7BXH9;Q8WXB1;C9JSX1;C9JES0	H7BXH9;Q8WXB1	Protein N-lysine methyltransferase METTL21A	METTL21A	3.98	9.61247e-05	0.552
Q86YS7;H0YFE9;H0YGU7	Q86YS7	C2 domain-containing protein 5	C2CD5	2.38	9.66728e-05	0.552
P11388;J3KTB7	P11388	DNA topoisomerase 2-alpha	TOP2A	4.46	9.68802e-05	0.553
P15121;E9PCX2;E9PEF9	P15121;E9PCX2	Aldose reductase	AKR1B1	2.6	0.000100078	0.556
Q07666;A0A6Q8PGH5;Q5VWX1	Q07666	KH domain-containing, RNA-binding, signal transduction-associated protein 1	KHDRBS1	2.19	0.000100754	0.557
Q15848	Q15848	Adiponectin	ADIPOQ	4.56	0.000101612	0.558
P51784;G5E9A6;Q5JXD3	P51784;G5E9A6	Ubiquitin carboxyl-terminal hydrolase 11;Ubiquitin carboxyl-terminal hydrolase	USP11	2.85	0.000102091	0.558
sp|A043185|abysis_43185;sp|A085162|abysis_85162	sp|A043185|abysis_43185			7.03	0.000102311	0.558
Q9Y2J8	Q9Y2J8	Protein-arginine deiminase type-2	PADI2	5.14	0.000103615	0.56
O60496;E5RIG9	O60496	Docking protein 2	DOK2	2.38	0.00010538	0.562
P04083;Q5T3N1;Q5T3N0	P04083	Annexin A1	ANXA1	2.51	0.000108149	0.564
A0A2R8Y455;A0A2R8Y620;A0A2R8Y7U2;A0A2R8Y600;Q86VX2;V9GY66	A0A2R8Y455;A0A2R8Y620;A0A2R8Y7U2;A0A2R8Y600;Q86VX2;V9GY66	COMM domain-containing protein 7	COMMD7	2.47	0.000111907	0.568
Q96QH2;M0R149	Q96QH2	PML-RARA-regulated adapter molecule 1	PRAM1	2.52	0.000113423	0.569
O15143;C9JEY1;C9K057;F8VXW2;C9JBJ7;C9JTT6;C9JM51;F8WEB3	O15143;C9JEY1;C9K057	Actin-related protein 2/3 complex subunit 1B	ARPC1B	3.22	0.000118226	0.573
Q8WVR3;B3KNS5;E9PFF9;F8WFE0	Q8WVR3;B3KNS5	Uncharacterized protein C7orf43	C7orf43	2.84	0.00011837	0.574
Q9UM07;B1AQ67;Q9ULW8	Q9UM07	Protein-arginine deiminase type-4	PADI4	5.06	0.000118823	0.574
O00178;B0QY59;F5H716;F5H257;F8WAZ4	O00178	GTP-binding protein 1	GTPBP1	2.46	0.00011905	0.574
O14807;C9J8Q6;C9J601	O14807	Ras-related protein M-Ras	MRAS	4.53	0.000119944	0.575
Q68CQ4;H7C2R4	Q68CQ4	Digestive organ expansion factor homolog	DIEXF	3.24	0.000122784	0.577
O75969	O75969	A-kinase anchor protein 3	AKAP3	4.35	0.00012371	0.578
Q9Y6K5;A0A7P0T9W6;A0A7P0T9J0;A0A7P0Z4D0;A0A7P0T8S7;A0A7P0TAU8;A0A7P0Z4F1;A0A7P0TAC0;A0A7P0Z4F5;A0A7P0T7V2;A0A7P0TAS0;A0A7P0TB73;A0A7P0TAC8;A0A7P0TAV3;A0A7P0T8J8;A0A7P0TA50;F8VS35;A0A7P0T9Z5;A0A7P0TAT5;F8VWK9;A0A7P0TA44;A0A7P0T884;A0A7P0TB72;A0A7P0Z4Q3	Q9Y6K5;A0A7P0T9W6;A0A7P0T9J0;A0A7P0Z4D0;A0A7P0T8S7;A0A7P0TAU8;A0A7P0Z4F1;A0A7P0TAC0;A0A7P0Z4F5;A0A7P0T7V2;A0A7P0TAS0;A0A7P0TB73;A0A7P0TAC8	2-5-oligoadenylate synthase 3	OAS3	2.98	0.000123764	0.578
P46976;C9JQ42;G5E9W8;C9J8R8;C9J7C7	P46976;C9JQ42;G5E9W8	Glycogenin-1	GYG1	2.74	0.00012457	0.579
H0YLM8;Q8TDJ6	H0YLM8;Q8TDJ6	DmX-like protein 2	DMXL2	2.19	0.000124685	0.579
P28482;K7ELV1;K7EN18;P31152	P28482	Mitogen-activated protein kinase 1	MAPK1	2.13	0.00012497	0.579
J3QQV2;J3KTM6;O15427;J3QSC3;J3QQS9;J3KTI8;J3QRP8;J3QRA0	J3QQV2;J3KTM6;O15427	Monocarboxylate transporter 4	SLC16A3	4.25	0.00012592	0.58
sp|A070453|abysis_70453;sp|A070493|abysis_70493;sp|A070463|abysis_70463;sp|A070451|abysis_70451;sp|A070440|abysis_70440;sp|A070439|abysis_70439;sp|A070432|abysis_70432;sp|A070424|abysis_70424;sp|A070411|abysis_70411;sp|A070489|abysis_70489;sp|A070475|abysis_70475;sp|A070410|abysis_70410;sp|A070469|abysis_70469;sp|A070446|abysis_70446	sp|A070453|abysis_70453;sp|A070493|abysis_70493;sp|A070463|abysis_70463;sp|A070451|abysis_70451;sp|A070440|abysis_70440;sp|A070439|abysis_70439;sp|A070432|abysis_70432;sp|A070424|abysis_70424;sp|A070411|abysis_70411;sp|A070489|abysis_70489;sp|A070475|abysis_70475;sp|A070410|abysis_70410;sp|A070469|abysis_70469;sp|A070446|abysis_70446			7.12	0.000126173	0.58
Q6JHV3;H0YMI4;Q9Y6I4;H0YLB7;H0YKU8;H0YL81;H0YM72;H0YMP6;H0YLG0	Q6JHV3;H0YMI4;Q9Y6I4;H0YLB7;H0YKU8	Ubiquitin carboxyl-terminal hydrolase;Ubiquitin carboxyl-terminal hydrolase 3	USP3	2.46	0.000127439	0.581
Q9Y3Q3	Q9Y3Q3	Transmembrane emp24 domain-containing protein 3	TMED3	4.11	0.000128339	0.582
P35236;J3KR55;H7C4T8	P35236;J3KR55	Tyrosine-protein phosphatase non-receptor type 7	PTPN7	3.21	0.000131887	0.585
CON__P02538;P02538	CON__P02538;P02538	Keratin, type II cytoskeletal 6A	KRT6A	5.78	0.000132099	0.585
sp|A024317|abysis_24317;sp|A035607|abysis_35607;sp|A032734|abysis_32734;sp|A032721|abysis_32721	sp|A024317|abysis_24317			4.24	0.00013361	0.586
P62140;E7ETD8;C9JP48;C9J9S3	P62140;E7ETD8	Serine/threonine-protein phosphatase PP1-beta catalytic subunit;Serine/threonine-protein phosphatase	PPP1CB	2.22	0.000134536	0.587
Q2TB90	Q2TB90	Putative hexokinase HKDC1	HKDC1	5.97	0.000136929	0.588
sp|A008533|abysis_8533;sp|A064839|abysis_64839;sp|A003172|abysis_3172;sp|A056757|abysis_56757;sp|A059701|abysis_59701;sp|A056982|abysis_56982;sp|A059634|abysis_59634;sp|A059659|abysis_59659;sp|A069632|abysis_69632;sp|A018495|abysis_18495;sp|A056779|abysis_56779;sp|A059657|abysis_59657;sp|A046820|abysis_46820;sp|A056363|abysis_56363;sp|A056013|abysis_56013;sp|A002657|abysis_2657;sp|A002167|abysis_…	sp|A008533|abysis_8533			2.9	0.000138824	0.59
P61225	P61225	Ras-related protein Rap-2b	RAP2B	2.94	0.000139344	0.59
Q9UKD2	Q9UKD2	mRNA turnover protein 4 homolog	MRTO4	3.58	0.000139865	0.591
A8MVE2;A0A0G2JQ46;A0A0B4J1W1;A0A0G2JQ44;A0A087WSX8;A0A0G2JNM2;A0A0G2JQ15;Q8NHL6	A8MVE2;A0A0G2JQ46;A0A0B4J1W1;A0A0G2JQ44;A0A087WSX8;A0A0G2JNM2;A0A0G2JQ15;Q8NHL6	Leukocyte immunoglobulin-like receptor subfamily B member 1	LILRB1	2.66	0.000141887	0.592
A0A0G2JNQ7;Q8N423;A0A0G2JNT8;A0A0G2JN35;A0A0G2JPH5;A0A0G2JNH0;A0A0G2JM05;A0A0G2JLS7;A0A0G2JNE7;H7C0C3;A0A075B7A5;P59901	A0A0G2JNQ7;Q8N423;A0A0G2JNT8;A0A0G2JN35;A0A0G2JPH5;A0A0G2JNH0	Leukocyte immunoglobulin-like receptor subfamily B member 2	LILRB2	4.19	0.00014339	0.593
Q15080;A0A0G2JR51;A0A494BZS1;A0A217FLJ2;B0QY04	Q15080;A0A0G2JR51;A0A494BZS1;A0A217FLJ2;B0QY04	Neutrophil cytosol factor 4	NCF4	3.66	0.000143454	0.593
sp|A083314|abysis_83314;sp|A036061|abysis_36061;sp|A036044|abysis_36044;sp|A036033|abysis_36033;sp|A036049|abysis_36049	sp|A083314|abysis_83314;sp|A036061|abysis_36061;sp|A036044|abysis_36044;sp|A036033|abysis_36033;sp|A036049|abysis_36049			4.16	0.000143891	0.593
Q96BK5;E5RJG9;E5RGR1;A0A0A6YYK5	Q96BK5	PIN2/TERF1-interacting telomerase inhibitor 1	PINX1	3.83	0.000145923	0.595
Q8NB16;I3L4A6;I3L2T9;I3L4Z5;I3L2U3	Q8NB16	Mixed lineage kinase domain-like protein	MLKL	2.79	0.000146601	0.595
A0A2R8YDF1;P17213;H0Y738;A0A0D9SFX6	A0A2R8YDF1;P17213	Bactericidal permeability-increasing protein	BPI	4.1	0.000146751	0.595
A0A2U3TZS7;P43004;A0A2R8Y860;A0A2R8Y4W1;A0A2R8Y740;A0A2R8YD46;A0A2R8Y5Y1;A0A2R8Y6B8;A0A2R8YFE3;A0A2U3U0E3;A0A2R8Y6J5;A0A2R8Y862;H0YEK4;A0A2R8YG01;A0A163QEF0;A0A2R8Y4N0;C9J9N5;A0A2R8Y4D1;A0A2R8Y642;A0A2R8YHI4;A0A2R8YH93;H0YEB1	A0A2U3TZS7;P43004;A0A2R8Y860;A0A2R8Y4W1;A0A2R8Y740;A0A2R8YD46;A0A2R8Y5Y1;A0A2R8Y6B8;A0A2R8YFE3;A0A2U3U0E3;A0A2R8Y6J5;A0A2R8Y862;H0YEK4;A0A2R8YG01;A0A163QEF0;A0A2R8Y4N0	Excitatory amino acid transporter 2;Amino acid transporter	SLC1A2	5.29	0.000149437	0.597
A0A7P0TAQ9;Q8IXB1;A0A7P0Z431;A0A7P0TB97;A0A7P0TB83;A0A7P0T9B7;A0A7P0TB22;E7EP04;A0A7P0Z4F2;A0A494C1G5;A0A7P0T8Y3;H7C1G0	A0A7P0TAQ9;Q8IXB1;A0A7P0Z431;A0A7P0TB97	DnaJ homolog subfamily C member 10	DNAJC10	2.26	0.000153297	0.6
Q96AY3;H0Y827;K7ELI6;K7ESG6;C9JPC3;K7EM43	Q96AY3	Peptidyl-prolyl cis-trans isomerase FKBP10	FKBP10	5.38	0.000154234	0.6
O15264;Q5R3E6	O15264	Mitogen-activated protein kinase 13	MAPK13	4.82	0.000157756	0.602
A0A1B0GV05;Q684P5	A0A1B0GV05;Q684P5	Rap1 GTPase-activating protein 2	RAP1GAP2	3.37	0.000158094	0.603
sp|A009933|abysis_9933	sp|A009933|abysis_9933			3.99	0.000161756	0.605
A0A1C7CYX9;Q16555;E5RFU4	A0A1C7CYX9;Q16555	Dihydropyrimidinase-related protein 2	DPYSL2	2.02	0.000162278	0.605
Q9UIQ6	Q9UIQ6	Leucyl-cystinyl aminopeptidase;Leucyl-cystinyl aminopeptidase, pregnancy serum form	LNPEP	3.31	0.00016741	0.608
A0A494C0J7;Q08188	A0A494C0J7;Q08188	Protein-glutamine gamma-glutamyltransferase E;Protein-glutamine gamma-glutamyltransferase E 50 kDa catalytic chain;Protein-glutamine gamma-glutamyltransferase E 27 kDa non-catalytic chain	TGM3	3.35	0.000168428	0.609
P23921;E9PL69;E9PP77;H0YCY7	P23921;E9PL69	Ribonucleoside-diphosphate reductase large subunit	RRM1	3.33	0.000170871	0.61
sp|A014548|abysis_14548;sp|A081160|abysis_81160;sp|A041288|abysis_41288;sp|A041276|abysis_41276;sp|A017275|abysis_17275;sp|A033637|abysis_33637;sp|A017230|abysis_17230;sp|A031077|abysis_31077;sp|A082158|abysis_82158;sp|A031055|abysis_31055;sp|A071545|abysis_71545;sp|A033626|abysis_33626;sp|A071546|abysis_71546;sp|A004816|abysis_4816;sp|A045630|abysis_45630;sp|A078587|abysis_78587;A0A0B4J1Y8;sp|A0…	sp|A014548|abysis_14548;sp|A081160|abysis_81160;sp|A041288|abysis_41288;sp|A041276|abysis_41276;sp|A017275|abysis_17275;sp|A033637|abysis_33637;sp|A017230|abysis_17230;sp|A031077|abysis_31077;sp|A082158|abysis_82158;sp|A031055|abysis_31055;sp|A071545|abysis_71545;sp|A033626|abysis_33626;sp|A071546|abysis_71546;sp|A004816|abysis_4816;sp|A045630|abysis_45630;sp|A078587|abysis_78587;A0A0B4J1Y8;sp|A0…		IGLV9-49	6.46	0.000171476	0.61
O95347;Q5T821;A0A0C4DGE5	O95347	Structural maintenance of chromosomes protein 2	SMC2	4.45	0.000175495	0.613
P09917;A0A087X109	P09917	Arachidonate 5-lipoxygenase	ALOX5	4.82	0.000176509	0.613
Q14764;H3BQK6;H3BRL2;H3BUK7;H3BNF6;H3BP76;H3BPZ2;H3BNF2;H3BUP3;I3L155;H3BQE7	Q14764	Major vault protein	MVP	2.45	0.000179761	0.615
Q96D96;F8VPF7;F8W0B3;F8VS40	Q96D96	Voltage-gated hydrogen channel 1	HVCN1	3.04	0.000179826	0.615
Q96K37;H7C1I0;C9JK45	Q96K37;H7C1I0	Solute carrier family 35 member E1	SLC35E1	4.02	0.000181073	0.616
P15927;Q5TEJ7;Q5TEJ0	P15927;Q5TEJ7	Replication protein A 32 kDa subunit	RPA2	2.37	0.000182292	0.616
Q8IV08;M0R1F7;M0R3G9;M0R2W7;E2QRG1;M0QZK2;M0R2E7;M0QY94;M0QX50;M0QX99;A0A0A0MS28	Q8IV08	Phospholipase D3	PLD3	3.61	0.000182457	0.616
P31350;A0A286YFD6;A0A7P0SBL1;A0A2R8Y837	P31350;A0A286YFD6;A0A7P0SBL1	Ribonucleoside-diphosphate reductase subunit M2	RRM2	4.39	0.000186629	0.618
Q8WWW0;A0A1B0GTG4;Q8TEK8;A0A075B763	Q8WWW0;A0A1B0GTG4;Q8TEK8;A0A075B763	Ras association domain-containing protein 5	RASSF5;FLJ00186	3.87	0.000186659	0.619
sp|A071773|abysis_71773	sp|A071773|abysis_71773			4.89	0.000187883	0.619
P98171;E7EQN5;E9PCM6;A0A0B4J1X7;S4R314;S4R352;C9JLA8;C9J5M2;F8WAR0;H7C2Z8;H7C120;H7C3G3;H7C3K8;A0A2R8YE00;A0A2R8Y4P6	P98171;E7EQN5;E9PCM6;A0A0B4J1X7	Rho GTPase-activating protein 4	ARHGAP4	3.1	0.000188853	0.62
P20839;C9J381;A0A3B3IRL5;C9K0R9;C9J029;H7C5T1;H7C511	P20839;C9J381;A0A3B3IRL5;C9K0R9	Inosine-5-monophosphate dehydrogenase 1;Inosine-5-monophosphate dehydrogenase	IMPDH1	4.16	0.00019002	0.62
G5EA09	G5EA09		SDCBP	3.83	0.000191578	0.621
O43490;D6RIF3;H0Y9Q5	O43490	Prominin-1	PROM1	3	0.000193331	0.622
P13686;K7EJD9;K7EIP0;A0A3B3IS75;K7ESF2	P13686;K7EJD9	Tartrate-resistant acid phosphatase type 5	ACP5	3.22	0.000193423	0.622
A0A0C4DFV9	A0A0C4DFV9		SET	2.09	0.000199346	0.625
Q70UQ0	Q70UQ0	Inhibitor of nuclear factor kappa-B kinase-interacting protein	IKBIP	2.67	0.00019968	0.625
A0A3B3IRL2;O75629	A0A3B3IRL2;O75629	Protein CREG1	CREG1	3.3	0.000202204	0.626
P62805	P62805	Histone H4	HIST1H4A	2.14	0.000204837	0.627
Q8NG68	Q8NG68	Tubulin--tyrosine ligase	TTL	6.88	0.00020681	0.628
P12236	P12236	ADP/ATP translocase 3;ADP/ATP translocase 3, N-terminally processed	SLC25A6	2.21	0.00021097	0.63
P61626	P61626	Lysozyme C	LYZ	2.75	0.00021157	0.63
Q9P2I0;H0YJF4;G3V3T7	Q9P2I0	Cleavage and polyadenylation specificity factor subunit 2	CPSF2	2.2	0.000213273	0.631
Q9Y251;A0A7P0TBD9;D6RAQ1;D6RHG4	Q9Y251;A0A7P0TBD9	Heparanase;Heparanase 8 kDa subunit;Heparanase 50 kDa subunit	HPSE	4.68	0.000214409	0.631
CON__P35908v2;P35908	CON__P35908v2;P35908	Keratin, type II cytoskeletal 2 epidermal	KRT2	2.65	0.000224067	0.635
H7BXD5;P28676;H7C2Z6;C9JIZ3;C9JWQ8;C9JV47	H7BXD5;P28676;H7C2Z6	Grancalcin	GCA	4.82	0.000227493	0.637
Q6SZW1;J3KSG7;J3KRZ6	Q6SZW1	Sterile alpha and TIR motif-containing protein 1	SARM1	3.6	0.000230641	0.638
Q16666;H3BM18;X6RHM1;H3BR88;H3BVE6;H3BR65	Q16666	Gamma-interferon-inducible protein 16	IFI16	2.39	0.000231354	0.638
P63000	P63000	Ras-related C3 botulinum toxin substrate 1	RAC1	2.55	0.000231368	0.638
H7C0A2;P20749	H7C0A2;P20749	B-cell lymphoma 3 protein	BCL3	3.26	0.00023202	0.639
Q7RTN6;A0A1W2PPJ9;A0A1W2PQF1;A0A1W2PPG2;A0A1W2PP78;A0A1W2PR00;A0A1W2PQ00;A0A1W2PPM8;A0A1W2PQE8;A0A1W2PNV7;A0A1W2PS04;J3QS66;A0A1W2PRQ6;J3QQS3;Q86YC8;A0A1W2PR65;A0A1W2PRW9;A0A1W2PR44;J3KSA2;A0A1W2PPI1;J3QRC1;J3KSK5;A0A1W2PQ20;J3QKR7;A0A1W2PNV1;J3QRH3;J3QKU4	Q7RTN6;A0A1W2PPJ9;A0A1W2PQF1;A0A1W2PPG2;A0A1W2PP78;A0A1W2PR00;A0A1W2PQ00;A0A1W2PPM8;A0A1W2PQE8;A0A1W2PNV7;A0A1W2PS04;J3QS66	STE20-related kinase adapter protein alpha	STRADA	2.57	0.000232035	0.639
sp|A080991|abysis_80991;sp|A080990|abysis_80990;sp|A037296|abysis_37296;sp|A037293|abysis_37293	sp|A080991|abysis_80991;sp|A080990|abysis_80990;sp|A037296|abysis_37296			4.38	0.000232519	0.639
P04075;J3KPS3;H3BR68	P04075;J3KPS3	Fructose-bisphosphate aldolase A;Fructose-bisphosphate aldolase	ALDOA	1.95	0.000233678	0.639
Q6P1K8;D6RID8;Q13888;D6RJD3;R4GMS9;D6RIT7;D6RGC9;D6RAW1	Q6P1K8;D6RID8;Q13888;D6RJD3;R4GMS9	General transcription factor IIH subunit 2-like protein;General transcription factor IIH subunit 2	GTF2H2C;GTF2H2	4.35	0.000233726	0.639
Q9NXC2;S4R302	Q9NXC2	Glucose-fructose oxidoreductase domain-containing protein 1	GFOD1	5.89	0.000235527	0.64
Q7Z6I6;A0A0A0MRJ8;A0A0A0MRJ9;E9PLT5	Q7Z6I6;A0A0A0MRJ8;A0A0A0MRJ9	Rho GTPase-activating protein 30	ARHGAP30	4.58	0.000237733	0.641
P12821;A0A0A0MSN4;F6X3S4;J3KTB8;J3KS28;J3KTH9;J3KSQ5;J3QLR4;J3KRH5	P12821;A0A0A0MSN4;F6X3S4	Angiotensin-converting enzyme;Angiotensin-converting enzyme, soluble form	ACE	5.02	0.000238512	0.641
Q9NQ88;A0A0U1RQD1;A0A6Q8PFP0	Q9NQ88;A0A0U1RQD1;A0A6Q8PFP0	Fructose-2,6-bisphosphatase TIGAR	TIGAR	3.48	0.000240733	0.642
sp|A057001|abysis_57001;sp|A059472|abysis_59472	sp|A057001|abysis_57001;sp|A059472|abysis_59472			6.94	0.000244889	0.643
O95967;E9PRU1;H0YEU0;H0YET5;H0YCR9;E9PI47;E9PRQ8;E9PKA3;H0YCB5	O95967;E9PRU1	EGF-containing fibulin-like extracellular matrix protein 2	EFEMP2	4.31	0.000245823	0.644
P40937;C9JH72;F5H5S0;E9PEP3;F5H0U6;F5H304	P40937	Replication factor C subunit 5	RFC5	2.82	0.00024612	0.644
R4GN15;Q9BRR9;H0YI36;F8VW89;F8VR90;H0YI33;F8W1N6	R4GN15;Q9BRR9	Rho GTPase-activating protein 9	ARHGAP9	3.49	0.000248971	0.645
Q32P28;H7C2W6;E2QRI1	Q32P28	Prolyl 3-hydroxylase 1	LEPRE1	2	0.000250225	0.645
Q9P258	Q9P258	Protein RCC2	RCC2	2.91	0.000251305	0.646
Q5JVZ5;Q96JJ3;H0YCM7;Q5JVZ8;Q5JVZ4;Q5JW01	Q5JVZ5;Q96JJ3;H0YCM7	Engulfment and cell motility protein 2	ELMO2	2.49	0.000252527	0.646
Q8N335;C9JFA7;C9JM46;C9K0P5	Q8N335;C9JFA7;C9JM46	Glycerol-3-phosphate dehydrogenase 1-like protein;Glycerol-3-phosphate dehydrogenase [NAD(+)]	GPD1L	2.29	0.000252767	0.646
Q6ZS17;A0A0A0MTL6;H3BSV5;H3BMG9;H3BQI5;H3BSX9;H3BU12;H3BS40;H3BUP6;H3BP86	Q6ZS17;A0A0A0MTL6	Protein FAM65A	FAM65A	2.3	0.000252915	0.646
A0A0A0MSV6;D6R934;P02746;D6RGJ1	A0A0A0MSV6;D6R934;P02746	Complement C1q subcomponent subunit B	C1QB	4.68	0.00025354	0.646
Q96E11;X6RDS5	Q96E11	Ribosome-recycling factor, mitochondrial	MRRF	2.08	0.000256047	0.647
sp|A043175|abysis_43175;sp|A043197|abysis_43197;sp|A086806|abysis_86806;sp|A037632|abysis_37632	sp|A043175|abysis_43175			6.75	0.000261044	0.649
O95164	O95164	Ubiquitin-like protein 3	UBL3	3.32	0.000262418	0.649
Q7Z5J4;A8MXE8;J3QLL5	Q7Z5J4;A8MXE8	Retinoic acid-induced protein 1	RAI1	4.37	0.000263867	0.65
O60568;H7C2S8;H7C2V1;H7C0B8;C9JU11;H7C2A8;C9JIX5	O60568	Procollagen-lysine,2-oxoglutarate 5-dioxygenase 3	PLOD3	2.08	0.000265612	0.65
sp|A081306|abysis_81306;sp|A008849|abysis_8849;sp|A035204|abysis_35204	sp|A081306|abysis_81306;sp|A008849|abysis_8849;sp|A035204|abysis_35204			3.5	0.000265703	0.651
Q9NX76	Q9NX76	CKLF-like MARVEL transmembrane domain-containing protein 6	CMTM6	5.28	0.000268601	0.651
Q969F9;G5E9V4;H7C5G2	Q969F9;G5E9V4	Hermansky-Pudlak syndrome 3 protein	HPS3	3.3	0.000269504	0.652
Q9Y5K8;G3V2V6;G3V2S6;G3V559;H0YJH8;G3V3T8;G3V341;H0YJS0;G3V5S7;H0YJ55	Q9Y5K8;G3V2V6;G3V2S6;G3V559;H0YJH8	V-type proton ATPase subunit D	ATP6V1D	1.98	0.000270071	0.652
X5CMH5;A0A087WYD6;Q03519;E7ENX8	X5CMH5;A0A087WYD6;Q03519;E7ENX8	Antigen peptide transporter 2	TAP2	3.38	0.00027065	0.652
P42331;H7C4P1;F8WDF6;F8WAV9	P42331;H7C4P1	Rho GTPase-activating protein 25	ARHGAP25	2.34	0.000272382	0.653
sp|A081249|abysis_81249;A0A0A0MS08;sp|A012562|abysis_12562;sp|A027427|abysis_27427;sp|A027026|abysis_27026;sp|A028176|abysis_28176;sp|A026572|abysis_26572;sp|A027909|abysis_27909;sp|A027595|abysis_27595;sp|A029914|abysis_29914;sp|A005627|abysis_5627;sp|A065957|abysis_65957;sp|A087440|abysis_87440;sp|A086302|abysis_86302;sp|A059972|abysis_59972;sp|A059118|abysis_59118;sp|A052157|abysis_52157;sp|A0…	sp|A081249|abysis_81249;A0A0A0MS08		IGHG1	4.97	0.000274151	0.653
Q5M775;A0A7I2V486;A0A7I2V416;A0A7P0TBP2;A0A7I2YQJ3;A0A7I2V451;A0A7P0Z4I1;J3QS22;A0A7I2V562;A0A7P0TAS3;A0A7P0TB87;A0A7P0T9K0;J3KRB9;J3KSG2;J3QQM0;A0A7P0TBD3;A0A7I2V5G2;J3KRN9;A0A7P0T8Y6;J3QKL1	Q5M775;A0A7I2V486;A0A7I2V416;A0A7P0TBP2;A0A7I2YQJ3;A0A7I2V451;A0A7P0Z4I1;J3QS22;A0A7I2V562;A0A7P0TAS3;A0A7P0TB87;A0A7P0T9K0	Cytospin-B	SPECC1	4.45	0.000275318	0.654
A0A8C8KBL6;P23229;C9JXX7;H7BZ97	A0A8C8KBL6;P23229	Integrin alpha-6;Integrin alpha-6 heavy chain;Integrin alpha-6 light chain;Processed integrin alpha-6	ITGA6	2.98	0.000279051	0.655
A0A3B3ISS6;Q14956	A0A3B3ISS6;Q14956	Transmembrane glycoprotein NMB	GPNMB	4.29	0.000283016	0.656
E7EQB2;E7ER44;P02788;C9JCF5;A0A804HKN5	E7EQB2;E7ER44;P02788	Lactotransferrin;Lactoferricin-H;Kaliocin-1;Lactoferroxin-A;Lactoferroxin-B;Lactoferroxin-C	LTF	3.4	0.000287542	0.657
P49795	P49795	Regulator of G-protein signaling 19	RGS19	4.36	0.000288285	0.658
A0A140T9H5;O19617;A0A140T921;A0A140T9U8;A0A140TA05;A0A140T9L3;A0A140TA12	A0A140T9H5;O19617;A0A140T921;A0A140T9U8;A0A140TA05;A0A140T9L3		HLA-C	5.36	0.000289741	0.658
Q13568;C9J7M2;A0A087WWA0;C9JYP7;F8WDH6;A0A0G2UM11;C9JB67	Q13568	Interferon regulatory factor 5	IRF5	2.31	0.000292786	0.659
P49137;O43930	P49137	MAP kinase-activated protein kinase 2	MAPKAPK2	2.48	0.000297083	0.66
C9JCC6;Q14919;E9PQX9;E9PNC7;E9PMW2	C9JCC6;Q14919;E9PQX9;E9PNC7	Dr1-associated corepressor	DRAP1	4.92	0.000298746	0.661
P08575;M3ZCP1;A0A075B788;E9PKH0;A0A140TA77;A0A140TA68;A0A0G2JNW2;M9MMK9;M9MMK8;M9MML4;M9MML3;A0A140TA57;A0A2R8Y5B1;A0A2R8YE81	P08575;M3ZCP1;A0A075B788	Receptor-type tyrosine-protein phosphatase C	PTPRC	2.58	0.000300782	0.661
Q9UIB8	Q9UIB8	SLAM family member 5	CD84	3.85	0.00030359	0.662
P48960	P48960	CD97 antigen;CD97 antigen subunit alpha;CD97 antigen subunit beta	CD97	2.02	0.000304806	0.662
P67936;A0A2R8YE05;K7ENT6;A0A5F9UN72;K7EPB9	P67936;A0A2R8YE05;K7ENT6;A0A5F9UN72	Tropomyosin alpha-4 chain	TPM4	2.08	0.000307487	0.663
Q9UHX3;M0R0K5;M0QY55;B4DWB8;K7EPE8;M0R1G2;E7EW83	Q9UHX3;M0R0K5;M0QY55;B4DWB8	EGF-like module-containing mucin-like hormone receptor-like 2	EMR2;ADGRE2	2.67	0.000309049	0.663
P35475;D6R9D5;H0Y9R9	P35475	Alpha-L-iduronidase	IDUA	2.96	0.000313664	0.665
Q6VY07;B4DF77;E9PPK2;E9PNZ9;E9PNG7;E9PSG7;H0YCU5;E9PSE1;H0YF56;H0YE62	Q6VY07;B4DF77	Phosphofurin acidic cluster sorting protein 1	PACS1	3.27	0.000315748	0.665
A0A8I5KUD9;Q9UQ13;A0A8I5QJS4;A0A8I5KUQ6;X6RI37	A0A8I5KUD9;Q9UQ13;A0A8I5QJS4	Leucine-rich repeat protein SHOC-2	SHOC2	2.69	0.000316567	0.665
Q86SF2;E9PBY3;H0YAH3;H0YAK0	Q86SF2	N-acetylgalactosaminyltransferase 7	GALNT7	3.21	0.000317685	0.666
Q14116	Q14116	Interleukin-18	IL18	2.55	0.00032102	0.667
M0R3D4;Q9UI14;M0R1H9;M0QXH1	M0R3D4;Q9UI14;M0R1H9	Prenylated Rab acceptor protein 1	RABAC1	5.47	0.000328666	0.669
Q86UX7;F5H1C6;F5H3I6;H0YFT5	Q86UX7;F5H1C6	Fermitin family homolog 3	FERMT3	1.96	0.000329014	0.669
A0A3B3IU45;P33991;A0A3B3IT92;A0A3B3IS57;E5RG31;A0A3B3ITP6;A0A3B3IRR8;A0A3B3ISC1	A0A3B3IU45;P33991;A0A3B3IT92;A0A3B3IS57;E5RG31;A0A3B3ITP6	DNA replication licensing factor MCM4	MCM4	3.78	0.000343881	0.672
A0A0C4DH07;Q8N2S1;F8WAA0;M0QZX0;A0A087WXC2;M0QXV3;M0R351;A0A087WVV5;M0QYE9	A0A0C4DH07;Q8N2S1	Latent-transforming growth factor beta-binding protein 4	LTBP4	3.97	0.000346884	0.673
P05423;E5RHT4;E7EQ68	P05423	DNA-directed RNA polymerase III subunit RPC4	POLR3D	4.35	0.000349178	0.674
Q9UDT6;H7C4L6	Q9UDT6	CAP-Gly domain-containing linker protein 2	CLIP2	3.55	0.000350748	0.674
Q16611	Q16611	Bcl-2 homologous antagonist/killer	BAK1	4.46	0.000353111	0.674
A0A7I2YQD4;A0A7I2V2U6;P13995;A0A7I2V482;B8ZZU9	A0A7I2YQD4;A0A7I2V2U6;P13995;A0A7I2V482;B8ZZU9	Bifunctional methylenetetrahydrofolate dehydrogenase/cyclohydrolase, mitochondrial;NAD-dependent methylenetetrahydrofolate dehydrogenase;Methenyltetrahydrofolate cyclohydrolase	MTHFD2	5.34	0.000356304	0.675
Q9P0J1;E5RIV4;E5RI96;E5RIE5	Q9P0J1	[Pyruvate dehydrogenase [acetyl-transferring]]-phosphatase 1, mitochondrial	PDP1	2.93	0.000356737	0.675
P20160;A0A087WXP0	P20160	Azurocidin	AZU1	4.73	0.00035761	0.675
O60645;D6RB59;H0Y995;D6RBR9	O60645;D6RB59	Exocyst complex component 3	EXOC3	2.81	0.000364219	0.677
P43304;F5GYK7;E7EM56	P43304	Glycerol-3-phosphate dehydrogenase, mitochondrial	GPD2	2.13	0.000364643	0.677
Q8N9F7;J3QQN7;J3KTA9;J3QRR6	Q8N9F7;J3QQN7;J3KTA9	Glycerophosphodiester phosphodiesterase domain-containing protein 1	GDPD1	3.21	0.00037738	0.68
O00203;Q13367;A0A590UKC4;A0A2R8Y2A8;A0A5F9UJV3;A0A590UJ60;A0A590UJU0;A0A590UK04;A0A590UJW5;A0A590UJU7;A0A590UJE5;F5GWU4;H0YBD0;A0A590UK30;F5GYB0;A0A590UK69;A0A590UJ44;A0A590UK64	O00203	AP-3 complex subunit beta-1	AP3B1	3.14	0.000380093	0.68
H3BTN6;Q9H6L2;H3BPY4;A0A8I5KVD3;A0A8I5KX99;A0A8I5KVP2;H3BMW7;A0A8I5KU61;A0A8I5QJQ3;A0A8I5KUT8	H3BTN6;Q9H6L2;H3BPY4;A0A8I5KVD3;A0A8I5KX99	Transmembrane protein 231	TMEM231	3.48	0.000382036	0.681
sp|A081248|abysis_81248;A0A0A0MS09;sp|A024289|abysis_24289;sp|A024296|abysis_24296;sp|A024292|abysis_24292;sp|A024294|abysis_24294;sp|A024291|abysis_24291;sp|A082663|abysis_82663;sp|A016241|abysis_16241;sp|A045131|abysis_45131;sp|A048668|abysis_48668	sp|A081248|abysis_81248;A0A0A0MS09;sp|A024289|abysis_24289;sp|A024296|abysis_24296;sp|A024292|abysis_24292;sp|A024294|abysis_24294;sp|A024291|abysis_24291		IGHD	4.65	0.000385857	0.682
Q9UGJ1;H3BPU4;H3BN56	Q9UGJ1;H3BPU4	Gamma-tubulin complex component 4	TUBGCP4	2.51	0.000395598	0.684
P13796;Q5TBN3;Q5TBN5	P13796	Plastin-2	LCP1	2.16	0.000396873	0.684
P31944	P31944	Caspase-14;Caspase-14 subunit p17, mature form;Caspase-14 subunit p10, mature form;Caspase-14 subunit p20, intermediate form;Caspase-14 subunit p8, intermediate form	CASP14	4.01	0.000402103	0.685
P46926;D6R9P4;D6RAY7;D6RFF8;D6RB13;D6R917;D6RFK5	P46926;D6R9P4;D6RAY7;D6RFF8;D6RB13	Glucosamine-6-phosphate isomerase 1;Glucosamine-6-phosphate isomerase	GNPDA1	1.84	0.000404103	0.685
G3XAI2;P07942;A0A7I2V4J9;A0A7I2V5X5;A0A7I2V3I5;A0A7I2V2T9;A0A7I2V3J7;A0A7I2V682;A0A7I2V407;A0A7I2V2J0;A0A7I2V5R0;E7EPA6;A0A7I2V2R2;C9J296;A0A7I2V5T9	G3XAI2;P07942;A0A7I2V4J9;A0A7I2V5X5;A0A7I2V3I5;A0A7I2V2T9;A0A7I2V3J7;A0A7I2V682	Laminin subunit beta-1	LAMB1	2.83	0.000404434	0.685
Q5Y7H0	Q5Y7H0		HLA-DQA1	4.84	0.000404631	0.685
Q9BUF5;K7ESM5;K7EL29;K7EN98;K7ESQ3;K7EQT3;K7ERA8;K7EJZ4;K7EPE5	Q9BUF5;K7ESM5	Tubulin beta-6 chain	TUBB6	1.94	0.000410823	0.687
P00813;F5GWI4;F5GXW0;F5GYD4	P00813;F5GWI4;F5GXW0	Adenosine deaminase	ADA	3.48	0.000413828	0.687
P30740;C9J7N5	P30740	Leukocyte elastase inhibitor	SERPINB1	2.8	0.000414043	0.687
P40938;A0A087X270	P40938	Replication factor C subunit 3	RFC3	2.07	0.000422181	0.689
CON__Q04695;Q04695;K7EPJ9;A0A3B3IS58	CON__Q04695;Q04695	Keratin, type I cytoskeletal 17	KRT17	5.68	0.000422673	0.689
Q6UXN9	Q6UXN9	WD repeat-containing protein 82	WDR82	2.32	0.000436467	0.691
Q6PHR2;H3BPN6;H3BT78;H3BP85	Q6PHR2;H3BPN6;H3BT78	Serine/threonine-protein kinase ULK3	ULK3	2.45	0.000436735	0.691
A0A0G2JKZ1;A2AB90;A0A0G2JH37;A0A0A0MSV9;O15533;Q6P1N7;A0A0A0MT98;C9JA35;A0A140T9B2;A0A0G2JJI5	A0A0G2JKZ1;A2AB90;A0A0G2JH37;A0A0A0MSV9;O15533;Q6P1N7;A0A0A0MT98	Tapasin	TAPBP	4.9	0.000438471	0.692
Q969N2;A0A1W2PNP0;A0A1W2PR73;A0A1W2PPS0;A0A1W2PPC3;A0A1W2PP57;A0A1W2PPR6;A0A1W2PP53;A0A1W2PPQ7;A0A1W2PRZ8;A0A1W2PR92;A0A1W2PP13;A0A1W2PRH2;A0A1W2PQ52;A0A1W2PPI8;A0A1W2PQY1;A0A1W2PQ29;H7C2Y2;A0A1W2PRV7;A0A1W2PNW9;A0A1W2PRG1;A0A1W2PPK4;A0A1W2PRH8;A0A1W2PNZ5;A0A1W2PP98;A0A1W2PNS2;A0A1W2PSC5;A0A1W2PP03;B7Z7C5;A0A1W2PR22;A0A1W2PR70;A0A1W2PP91;A0A1W2PQI9;A0A1W2PR34;A0A1W2PQL9	Q969N2;A0A1W2PNP0;A0A1W2PR73;A0A1W2PPS0;A0A1W2PPC3;A0A1W2PP57;A0A1W2PPR6;A0A1W2PP53;A0A1W2PPQ7;A0A1W2PRZ8;A0A1W2PR92;A0A1W2PP13;A0A1W2PRH2	GPI transamidase component PIG-T	PIGT	4.34	0.000441154	0.692
sp|A035621|abysis_35621;sp|A043402|abysis_43402;sp|A005319|abysis_5319	sp|A035621|abysis_35621			4.03	0.000444399	0.693
P39748;I3L3E9;F5H1Y3	P39748;I3L3E9	Flap endonuclease 1	FEN1	2.4	0.000445031	0.693
Q8TED1;E7ETY7;J3KNB5	Q8TED1;E7ETY7	Probable glutathione peroxidase 8;Glutathione peroxidase	GPX8	5.16	0.000446585	0.693
P47224	P47224	Guanine nucleotide exchange factor MSS4	RABIF	4.84	0.000446875	0.693
Q9Y4K0;E5RHH3;E5RFY0;H0YAP6;E5RI22;E5RJL2	Q9Y4K0	Lysyl oxidase homolog 2	LOXL2	3.89	0.000450078	0.694
Q7L523;Q5VZM0;Q5VZM2	Q7L523;Q5VZM0;Q5VZM2	Ras-related GTP-binding protein A;Ras-related GTP-binding protein B	RRAGA;RRAGB	2.02	0.00045198	0.694
O60725	O60725	Protein-S-isoprenylcysteine O-methyltransferase	ICMT	3.42	0.00045819	0.695
Q9NUB1;Q5TF43	Q9NUB1	Acetyl-coenzyme A synthetase 2-like, mitochondrial	ACSS1	2.95	0.000463414	0.696
P46940;A0A0J9YXZ5;H0YLE8;A0A087X225;H0YKA5;A0A087WWP1	P46940;A0A0J9YXZ5;H0YLE8	Ras GTPase-activating-like protein IQGAP1	IQGAP1	1.78	0.000469816	0.697
sp|A081254|abysis_81254;sp|A007991|abysis_7991;sp|A052424|abysis_52424;sp|A057424|abysis_57424;sp|A084528|abysis_84528;sp|A064180|abysis_64180;sp|A061273|abysis_61273;sp|A087694|abysis_87694;sp|A071556|abysis_71556;sp|A065529|abysis_65529;sp|A057581|abysis_57581;sp|A069140|abysis_69140;sp|A005275|abysis_5275;sp|A000978|abysis_978;sp|A078082|abysis_78082	sp|A081254|abysis_81254;sp|A007991|abysis_7991			3.79	0.000469819	0.697
P26022	P26022	Pentraxin-related protein PTX3	PTX3	3.62	0.000476224	0.698
Q92626;H7C1W1;H7C300;H7C3W2	Q92626;H7C1W1	Peroxidasin homolog	PXDN	2.94	0.000476434	0.698
A0A0D9SG72;P61764;A0A1B0GWF2;A0A1B0GVQ5;A0A2R8Y5D4;A0A1B0GTP9;A0A1B0GW76;A0A0D9SFQ7;A0A0D9SFW6;A0A0D9SEP9;A0A0D9SEH5;A0A096LP52;A0A1B0GTD8;A0A096LP33;A0A1B0GVV9	A0A0D9SG72;P61764;A0A1B0GWF2;A0A1B0GVQ5;A0A2R8Y5D4;A0A1B0GTP9;A0A1B0GW76	Syntaxin-binding protein 1	STXBP1	3.48	0.00047815	0.698
Q6UX06	Q6UX06	Olfactomedin-4	OLFM4	3.12	0.000483019	0.699
A0A1W2PPH1;P23368;A0A1W2PQT3;A0A1W2PQY8;A0A1W2PR68;A0A1W2PQF8;A0A1W2PRS2;A0A1W2PRY9;A0A1W2PQH4;A0A1W2PRH1;A0A1W2PPY2	A0A1W2PPH1;P23368;A0A1W2PQT3;A0A1W2PQY8;A0A1W2PR68;A0A1W2PQF8	NAD-dependent malic enzyme, mitochondrial	ME2	2.12	0.000483822	0.699
A0A024QZX5;A0A087X1N8;P35237;A0A2R8YD12;A0A2R8Y6A7;A0A2R8YDD0;A0A2R8Y517	A0A024QZX5;A0A087X1N8;P35237;A0A2R8YD12	Serpin B6	SERPINB6	3.48	0.00048778	0.7
Q8WUA4;H0Y4Q6;H7C318;H7C3X9;H7C1A9	Q8WUA4	General transcription factor 3C polypeptide 2	GTF3C2	2.96	0.000500219	0.702
Q13488;E9PNA6;E9PM12;E9PMC5;H0YCE3;H0YEL3;F5H847;F5GX48;K7ENA1;A0A2R8Y6X9	Q13488;E9PNA6;E9PM12	V-type proton ATPase 116 kDa subunit a isoform 3;V-type proton ATPase subunit a	TCIRG1	2.35	0.000508379	0.703
Q9UDY8;A0A3B3IS32;K7EP42;A0A3B3IS82	Q9UDY8;A0A3B3IS32	Mucosa-associated lymphoid tissue lymphoma translocation protein 1	MALT1	3.06	0.000516487	0.704
P02786;G3V0E5;H7C3V5;F8WBE5	P02786;G3V0E5	Transferrin receptor protein 1;Transferrin receptor protein 1, serum form	TFRC	3.64	0.000520688	0.705
O60443;C9JSR4;H7C147;H7BZJ0	O60443;C9JSR4	Non-syndromic hearing impairment protein 5	DFNA5	2.03	0.000529375	0.706
O95373;E9PLJ0	O95373	Importin-7	IPO7	2.15	0.000534665	0.707
Q05D32;H0YMH7;H0YNU2;H0YNW9	Q05D32	CTD small phosphatase-like protein 2	CTDSPL2	3.73	0.000535543	0.707
O95166;H6UMI1;I3L3J4	O95166;H6UMI1;I3L3J4	Gamma-aminobutyric acid receptor-associated protein	GABARAP	6.15	0.000541017	0.707
Q9H081;I3L4K6	Q9H081	Protein MIS12 homolog	MIS12	5.17	0.000546353	0.708
Q96J01;D6REC9;D6RGZ2;H7C0C5	Q96J01;D6REC9	THO complex subunit 3	THOC3	3.35	0.000550827	0.709
A0A087WYF1;P24043;A0A087WX80;A0A8I5KQG5	A0A087WYF1;P24043;A0A087WX80	Laminin subunit alpha-2	LAMA2	3.48	0.000553073	0.709
Q9UGT4	Q9UGT4	Sushi domain-containing protein 2	SUSD2	4.3	0.000553714	0.709
Q96TA1	Q96TA1	Niban-like protein 1	FAM129B	1.98	0.000553965	0.709
Q7Z6J4;H7BY95;F8WEZ2;P98174	Q7Z6J4	FYVE, RhoGEF and PH domain-containing protein 2	FGD2	3.44	0.000555588	0.709
P51798;H0Y2M6;H3BNG8;I3L470	P51798;H0Y2M6	H(+)/Cl(-) exchange transporter 7	CLCN7	3.49	0.00055721	0.71
Q6P589	Q6P589	Tumor necrosis factor alpha-induced protein 8-like protein 2	TNFAIP8L2	2.91	0.000562994	0.71
sp|A008536|abysis_8536;sp|A008447|abysis_8447;sp|A008486|abysis_8486;sp|A008537|abysis_8537;sp|A008543|abysis_8543;sp|A034265|abysis_34265;sp|A002949|abysis_2949;sp|A000103|abysis_103;sp|A047052|abysis_47052;sp|A006943|abysis_6943;sp|A008228|abysis_8228;sp|A003774|abysis_3774;sp|A047055|abysis_47055;sp|A047053|abysis_47053;sp|A079349|abysis_79349;sp|A035986|abysis_35986;sp|A031441|abysis_31441;sp…	sp|A008536|abysis_8536;sp|A008447|abysis_8447;sp|A008486|abysis_8486;sp|A008537|abysis_8537;sp|A008543|abysis_8543			3.99	0.000565273	0.711
Q9BZQ8;H0Y7M9;REV__Q9UHV5;REV__A0A087WVW6	Q9BZQ8	Protein Niban	FAM129A	3.22	0.000568609	0.711
Q8IUX7;H7C3D7;H7C0W8;H7C1J5;H7C4B5;H7C391;C9JLQ8	Q8IUX7	Adipocyte enhancer-binding protein 1	AEBP1	4.18	0.000568895	0.711
P49863	P49863	Granzyme K	GZMK	5.29	0.000572558	0.712
Q9NVQ4;C9JDZ2	Q9NVQ4;C9JDZ2	Fas apoptotic inhibitory molecule 1	FAIM	2.99	0.000573399	0.712
P20340;F5H3K7;F5GX61;C9JU14;C9JB90	P20340	Ras-related protein Rab-6A	RAB6A	1.67	0.000573716	0.712
A0A7I2V351;A0A7I2V487;A0A7I2YQE1;P52292;A0A7I2V3Z3;J3QLL0;J3KS65;J3QL07	A0A7I2V351;A0A7I2V487;A0A7I2YQE1;P52292;A0A7I2V3Z3	Importin subunit alpha-1	KPNA2	3.82	0.000573886	0.712
P09601;A0A7I2V3I1;B1AHA8;A0A7I2V277;A0A7I2V3M0	P09601;A0A7I2V3I1;B1AHA8	Heme oxygenase 1	HMOX1	1.76	0.000583547	0.713
P28907;H0Y950	P28907	ADP-ribosyl cyclase/cyclic ADP-ribose hydrolase 1	CD38	3	0.000587328	0.713
Q8N697	Q8N697	Solute carrier family 15 member 4	SLC15A4	4.17	0.000593772	0.714
Q8N0Z6;H9KV81	Q8N0Z6	Tetratricopeptide repeat protein 5	TTC5	2.52	0.00059598	0.714
sp|A081290|abysis_81290;sp|A035824|abysis_35824;sp|A019974|abysis_19974;sp|A073733|abysis_73733;sp|A057427|abysis_57427	sp|A081290|abysis_81290;sp|A035824|abysis_35824			4.32	0.000596172	0.714
A6NIW2;Q5JSL3;A0A0J9YW64;A0A0J9YXQ7	A6NIW2;Q5JSL3;A0A0J9YW64	Dedicator of cytokinesis protein 11	DOCK11	3.8	0.000596225	0.714
P49736;H0Y8E6;F8WDM3;H7C4N9;C9J013;C9JZ21	P49736;H0Y8E6	DNA replication licensing factor MCM2	MCM2	3.31	0.000600907	0.715
B4E2Q0;P98194;H0Y9V7;H0Y9S7;H0Y8X9;D6REJ1;D6RHV9;D6RGE9;H0YAH2	B4E2Q0;P98194;H0Y9V7	Calcium-transporting ATPase;Calcium-transporting ATPase type 2C member 1	ATP2C1	4.46	0.000601515	0.715
A0A494BZT8;Q9Y6A5;A0A087WUE2;E7EMT0;C9JA91;A0A494C117;H0Y8F2	A0A494BZT8;Q9Y6A5;A0A087WUE2	Transforming acidic coiled-coil-containing protein 3	TACC3	4.4	0.000602415	0.715
A0A0G2JH66;A0A140T9B7;A0A0G2JPA3;D0EV57;A0A140T8X0;A0A140T9V0;P30511;A0A140T939;A0A140T9W7;A0A140T9D9;A0A140T9C2;A0A140T9W3;A0A140T9X6;A0A140T9J8;A0A0G2JNV5;A0A140T9K3;A0A0D9SFW8;A0A140T9P9;A0A140T908;A0A140T925;A0A140T9A3;A0A140T9M4	A0A0G2JH66;A0A140T9B7;A0A0G2JPA3;D0EV57;A0A140T8X0;A0A140T9V0;P30511;A0A140T939;A0A140T9W7;A0A140T9D9;A0A140T9C2;A0A140T9W3;A0A140T9X6;A0A140T9J8;A0A0G2JNV5	HLA class I histocompatibility antigen, alpha chain F	HLA-F	3.72	0.000604082	0.715
A0A7I2V4L6;O15498;A0A7I2V3A1;A0A7I2V3V7;A0A7I2V530;A0A7I2V3S2;H7C3K7	A0A7I2V4L6;O15498;A0A7I2V3A1;A0A7I2V3V7	Synaptobrevin homolog YKT6	YKT6	2.98	0.000605323	0.716
Q15050	Q15050	Ribosome biogenesis regulatory protein homolog	RRS1	2.46	0.000610137	0.716
Q9HB90	Q9HB90	Ras-related GTP-binding protein C	RRAGC	2.44	0.000611247	0.716
Q6ZN40	Q6ZN40		TPM1	2.16	0.000614952	0.717
P50452;A0A1B0GU38;H7BXK7;C9JVA8;C9JTJ8	P50452;A0A1B0GU38	Serpin B8	SERPINB8	4.3	0.000617718	0.717
Q15691	Q15691	Microtubule-associated protein RP/EB family member 1	MAPRE1	1.79	0.000618276	0.717
CON__P19001	CON__P19001			5.53	0.000632296	0.719
P07311;G3V2U7;G3V3F8	P07311;G3V2U7	Acylphosphatase-1;Acylphosphatase	ACYP1	3.13	0.00063419	0.719
sp|A024376|abysis_24376;sp|A022775|abysis_22775;sp|A031325|abysis_31325;sp|A034147|abysis_34147;sp|A049540|abysis_49540;sp|A037937|abysis_37937	sp|A024376|abysis_24376			3.7	0.00064182	0.72
Q9NPH2;J3QS51	Q9NPH2	Inositol-3-phosphate synthase 1	ISYNA1	2.3	0.000647339	0.72
Q8IYJ3;A0A087X1N4	Q8IYJ3	Synaptotagmin-like protein 1	SYTL1	2.72	0.00064971	0.72
Q96AZ6;H0YMM4;H3BLY5	Q96AZ6;H0YMM4	Interferon-stimulated gene 20 kDa protein	ISG20	4.11	0.000650414	0.721
Q9UBB6;C9J5H8;H7C2R2	Q9UBB6;C9J5H8	Neurochondrin	NCDN	3.35	0.000650664	0.721
sp|A003797|abysis_3797;sp|A069921|abysis_69921;sp|A031588|abysis_31588;sp|A085053|abysis_85053;sp|A062303|abysis_62303;sp|A086838|abysis_86838;sp|A062420|abysis_62420;sp|A062461|abysis_62461;sp|A023795|abysis_23795;sp|A083518|abysis_83518;sp|A021719|abysis_21719;sp|A019502|abysis_19502;sp|A082858|abysis_82858;sp|A019488|abysis_19488;sp|A085617|abysis_85617;sp|A014607|abysis_14607;sp|A044640|abysi…	sp|A003797|abysis_3797			7.26	0.000656817	0.721
O00194;K7ES41	O00194;K7ES41	Ras-related protein Rab-27B	RAB27B	4.77	0.000659092	0.721
Q8IUR7;B7Z637;G5E9V6;C9J2I1;G5E9V7;C9JAA7;C9JBY2;H7C4J4;H7C5B7;C9J8P8;C9J625;H7C5H2	Q8IUR7;B7Z637;G5E9V6	Armadillo repeat-containing protein 8	ARMC8	2.26	0.000659212	0.722
P31146;H3BRY3;H3BTU6;H3BRJ0;H3BNA2;H3BU76;H3BSL1	P31146;H3BRY3	Coronin-1A;Coronin	CORO1A	2.21	0.000665652	0.722
Q9NR00	Q9NR00	Uncharacterized protein C8orf4	C8orf4	3.83	0.000669048	0.723
Q13371;H0Y3M0;H0Y5D3	Q13371	Phosducin-like protein	PDCL	3.68	0.000686279	0.724
Q92835;H0Y5Q9;H7C403;R4GMN8;D6RJB9	Q92835;H0Y5Q9	Phosphatidylinositol 3,4,5-trisphosphate 5-phosphatase 1	INPP5D	2.53	0.000687434	0.724
Q8IYB7;C9JGP4;H7C036;H7C1Q8	Q8IYB7	DIS3-like exonuclease 2	DIS3L2	3.31	0.000692892	0.725
Q15722;G3V4Q5;G3V244	Q15722;G3V4Q5	Leukotriene B4 receptor 1	LTB4R	3.32	0.000697529	0.725
Q8NBJ5;M0QX72;A0A8I5QKL8;A0A8I5QL08	Q8NBJ5;M0QX72	Procollagen galactosyltransferase 1	COLGALT1	1.72	0.000697576	0.725
E9PB90;P52789	E9PB90;P52789	Hexokinase;Hexokinase-2	HK2	4.41	0.000698489	0.725
Q9UJ70;H7C3G9;C9JEV6;H7C1L7;H0YEB7;H0YE82;H0YF44;H0YC94	Q9UJ70;H7C3G9;C9JEV6	N-acetyl-D-glucosamine kinase	NAGK	1.82	0.000700188	0.726
Q70IA6	Q70IA6	MOB kinase activator 2	MOB2	2.84	0.000701871	0.726
Q86VW0;F8WFB2;C9J4X8;C9JHW6;H7BZR8;H0Y774	Q86VW0	SEC14 domain and spectrin repeat-containing protein 1	SESTD1	2.56	0.000708069	0.726
P20592;C9JEL4;C9JS04;C9JZQ9	P20592	Interferon-induced GTP-binding protein Mx2	MX2	3.75	0.000708604	0.726
O75167;J3KP75;F5H858	O75167;J3KP75	Phosphatase and actin regulator 2;Phosphatase and actin regulator	PHACTR2	2.68	0.000728484	0.728
Q8N1Q1	Q8N1Q1	Carbonic anhydrase 13	CA13	2.48	0.000728625	0.728
Q05655;A0A494C1T7;C9K0E3;C9J9P1;C9JZU8;A0A494C125;A0A494BZX2	Q05655	Protein kinase C delta type;Protein kinase C delta type regulatory subunit;Protein kinase C delta type catalytic subunit	PRKCD	2.81	0.000732877	0.729
Q9Y613;H3BVE7;J3KTH7	Q9Y613	FH1/FH2 domain-containing protein 1	FHOD1	2.85	0.000739348	0.729
Q9H6W3	Q9H6W3	Bifunctional lysine-specific demethylase and histidyl-hydroxylase NO66	NO66	2.74	0.000740021	0.729
Q8WU39;H0Y9L3;D6RII0	Q8WU39	Marginal zone B- and B1-cell-specific protein	MZB1	2.39	0.000746458	0.73
Q6PK18;J3QRG1;K7ENS7;J3QLI8	Q6PK18;J3QRG1	2-oxoglutarate and iron-dependent oxygenase domain-containing protein 3	OGFOD3	2.83	0.000748359	0.73
P11215;H3BMV4	P11215	Integrin alpha-M	ITGAM	2.36	0.000748637	0.73
P16402	P16402	Histone H1.3	HIST1H1D	2.26	0.000755549	0.731
P51532;Q9HBD4;A0A2R8Y4P4;A0A2R8Y7S2;A0A2R8YGG3;A0A2R8Y440;A0A2R8YG32;A0A2R8Y7F3;A0A2R8Y6N0;A0A2R8Y4C5;A0A2R8Y6V2;A0A2R8YF58;A0A2R8Y526;A0A2R8Y7Y7;A0A2R8YF80;A0A2R8YDA1;A0A2R8YGP5;A0A2R8Y523;A0A2R8Y5K3;A0A2R8YFV8;K7EQF0;A0A2R8YFK5;A0A2R8YCY3;A0A2R8Y4R6;K7EP28;A0A2R8Y7R0;A0A2R8Y583;A0A2R8YF38	P51532;Q9HBD4;A0A2R8Y4P4;A0A2R8Y7S2;A0A2R8YGG3;A0A2R8Y440;A0A2R8YG32;A0A2R8Y7F3;A0A2R8Y6N0;A0A2R8Y4C5;A0A2R8Y6V2;A0A2R8YF58;A0A2R8Y526;A0A2R8Y7Y7;A0A2R8YF80;A0A2R8YDA1;A0A2R8YGP5;A0A2R8Y523	Transcription activator BRG1	SMARCA4	3.77	0.00077732	0.733
Q8N0U8	Q8N0U8	Vitamin K epoxide reductase complex subunit 1-like protein 1	VKORC1L1	4.98	0.00077857	0.733
P05362;E7ESS4;K7EKL8	P05362;E7ESS4	Intercellular adhesion molecule 1	ICAM1	1.6	0.000779256	0.733
Q9NVR2;H0YBW3;H0YBH6;H0YB36;E5RHN1;E5RJN5;H0YBB0	Q9NVR2	Integrator complex subunit 10	INTS10	2.77	0.00078271	0.733
M0R0P8;Q13459;M0R300;M0R2J3;M0QZY4;M0R332;M0QXP0;M0R240	M0R0P8;Q13459;M0R300	Unconventional myosin-IXb	MYO9B	2.55	0.000782892	0.733
P08758;D6RBE9;E9PHT9;D6RCN3	P08758;D6RBE9;E9PHT9	Annexin A5;Annexin	ANXA5	1.79	0.000783093	0.733
sp|A082354|abysis_82354;sp|A036145|abysis_36145;sp|A036135|abysis_36135	sp|A082354|abysis_82354;sp|A036145|abysis_36145			4.6	0.000783343	0.733
sp|A003513|abysis_3513;sp|A085686|abysis_85686;sp|A003528|abysis_3528;sp|A003526|abysis_3526;sp|A003525|abysis_3525;sp|A003524|abysis_3524;sp|A003523|abysis_3523;sp|A003522|abysis_3522;sp|A003521|abysis_3521;sp|A003520|abysis_3520;sp|A003519|abysis_3519;sp|A003517|abysis_3517;sp|A003516|abysis_3516;sp|A003514|abysis_3514;sp|A003512|abysis_3512	sp|A003513|abysis_3513;sp|A085686|abysis_85686;sp|A003528|abysis_3528;sp|A003526|abysis_3526;sp|A003525|abysis_3525;sp|A003524|abysis_3524;sp|A003523|abysis_3523;sp|A003522|abysis_3522;sp|A003521|abysis_3521;sp|A003520|abysis_3520;sp|A003519|abysis_3519;sp|A003517|abysis_3517;sp|A003516|abysis_3516;sp|A003514|abysis_3514;sp|A003512|abysis_3512			3.39	0.000785058	0.733
O75689;H0Y7Q1;A0A3B3ISA7;A0A087WTN6;H7C4B3;H7BZT6;H7C264;H7C324;C9JN36	O75689;H0Y7Q1;A0A3B3ISA7;A0A087WTN6;H7C4B3;H7BZT6;H7C264;H7C324	Arf-GAP with dual PH domain-containing protein 1	ADAP1	3.66	0.000787322	0.734
Q05707;J3QT83;Q4G0W3;H0YBB2	Q05707;J3QT83	Collagen alpha-1(XIV) chain	COL14A1	2.32	0.000788754	0.734
Q13510;A0A1B0GTZ5;A0A1B0GTM3;A0A1B0GUA4;A0A1B0GW68;E7EMM4;A0A1B0GUH5;A0A1B0GTP7;A0A1B0GUW4;A0A1B0GUG1;A0A1B0GUE3;A0A1B0GV06;A0A1B0GVG2;A0A1B0GUB3;A0A1B0GU62;A0A1B0GU06;A0A1B0GVJ1;A0A1B0GW48;A0A1B0GVE7;A0A1B0GV95;A0A1B0GUJ3;A0A1B0GVA3;A0A1B0GVC9;A0A1B0GW66;A0A1B0GV88	Q13510;A0A1B0GTZ5;A0A1B0GTM3;A0A1B0GUA4;A0A1B0GW68;E7EMM4;A0A1B0GUH5;A0A1B0GTP7;A0A1B0GUW4;A0A1B0GUG1;A0A1B0GUE3;A0A1B0GV06;A0A1B0GVG2;A0A1B0GUB3	Acid ceramidase;Acid ceramidase subunit alpha;Acid ceramidase subunit beta	ASAH1	2.53	0.00079548	0.734
Q92542;H0Y6T7;Q5T205;H0Y3Z4;Q5T209;Q5T210	Q92542;H0Y6T7;Q5T205;H0Y3Z4	Nicastrin	NCSTN	4.82	0.000797062	0.734
P11387;A0A7P0T852;A0A7P0T9R7;E5RJ33;H0YBR3;H0YAR3;H0YC03;E5RGE7;E5RGR4;E5RFE3;E5RGR2	P11387;A0A7P0T852	DNA topoisomerase 1	TOP1	1.74	0.000802487	0.735
P18084;V9GZ57;H7C4W1;H7C5U2;V9GYZ1;H7C580;V9GYD8	P18084	Integrin beta-5	ITGB5	3.14	0.00080682	0.735
O00160;M0QY89;M0QXU2;M0QXU5	O00160	Unconventional myosin-If	MYO1F	2.49	0.00080957	0.735
P33993;C9J8M6	P33993	DNA replication licensing factor MCM7	MCM7	4.33	0.000816011	0.736
P50454;E9PJH8;E9PPV6;E9PR70;E9PK86;E9PMI5;E9PKH2;E9PNX1;E9PIG2;E9PRS3;E9PQ34;E9PLA6;H0YEP8	P50454;E9PJH8;E9PPV6;E9PR70;E9PK86;E9PMI5	Serpin H1	SERPINH1	2.4	0.000816044	0.736
P05771;H3BV73;I3L148;I3L1Z0;J3KN97	P05771	Protein kinase C beta type	PRKCB	3.41	0.000821029	0.736
P16401	P16401	Histone H1.5	HIST1H1B	3.95	0.000823325	0.737
A0A7P0TA83;J3KQ66;P78509;H7C2B0	A0A7P0TA83;J3KQ66;P78509	Reelin	RELN	2.71	0.000831961	0.737
P09012;M0R268;M0R221;M0R2B8;M0QXK2;M0R0G9	P09012;M0R268;M0R221;M0R2B8;M0QXK2	U1 small nuclear ribonucleoprotein A	SNRPA	1.76	0.000841131	0.738
P15090;E5RIR0;E5RH45	P15090	Fatty acid-binding protein, adipocyte	FABP4	2.94	0.00085123	0.739
P42766;F2Z388	P42766;F2Z388	60S ribosomal protein L35	RPL35	3.35	0.000851475	0.739
Q9Y240;M0R081	Q9Y240;M0R081	C-type lectin domain family 11 member A	CLEC11A	4.18	0.000854888	0.739
Q8TE68;B4DKV7;K7EN83;K7EKX9;K7ELW3	Q8TE68;B4DKV7;K7EN83;K7EKX9	Epidermal growth factor receptor kinase substrate 8-like protein 1	EPS8L1	2.26	0.00086446	0.74
X6R8F3;P80188	X6R8F3;P80188	Neutrophil gelatinase-associated lipocalin	LCN2	5.11	0.000872805	0.74
P51606;A6NKZ2;H7C1A7;H7C2G7;H7C317	P51606;A6NKZ2	N-acylglucosamine 2-epimerase	RENBP	2.91	0.000874592	0.74
Q9Y2Y8	Q9Y2Y8	Proteoglycan 3	PRG3	3.99	0.000875451	0.74
C9JW74;Q5EB52;C9JWU9;R4GN52;C9JUD2;C9JRA9;C9JCM6	C9JW74;Q5EB52;C9JWU9	Mesoderm-specific transcript homolog protein	MEST	3.71	0.000878552	0.741
Q05315	Q05315	Galectin-10	CLC	4.78	0.000879097	0.741
Q9NPB8;H0Y565	Q9NPB8	Glycerophosphocholine phosphodiesterase GPCPD1	GPCPD1	2.84	0.000880124	0.741
Q9UKN8;F2Z356	Q9UKN8	General transcription factor 3C polypeptide 4	GTF3C4	2.67	0.000887613	0.741
Q9HB40;I3L4Z3;I3L4Z9;I3L2N6	Q9HB40	Retinoid-inducible serine carboxypeptidase	SCPEP1	1.8	0.000908592	0.743
Q9Y3L5;A0A087X2C3;F6U784	Q9Y3L5;A0A087X2C3;F6U784	Ras-related protein Rap-2c	RAP2C;RAP2A	2.57	0.000910455	0.743
Q01995;H0YCU9;E9PJ32	Q01995;H0YCU9	Transgelin	TAGLN	2	0.000923525	0.744
P10643	P10643	Complement component C7	C7	2.6	0.000930792	0.744
sp|A010245|abysis_10245;sp|A009055|abysis_9055;sp|A009541|abysis_9541;sp|A049066|abysis_49066	sp|A010245|abysis_10245;sp|A009055|abysis_9055;sp|A009541|abysis_9541			5.72	0.000932065	0.745
Q5NDL2;F5H225;C9J4G5;C9JQM7	Q5NDL2	EGF domain-specific O-linked N-acetylglucosamine transferase	EOGT	2.88	0.000934953	0.745
B8ZZA8;B8ZZC5	B8ZZA8;B8ZZC5		GLS	3.14	0.000938295	0.745
Q12913;E9PPH3	Q12913	Receptor-type tyrosine-protein phosphatase eta	PTPRJ	2.14	0.000947536	0.746
Q92692;K7EKE8	Q92692;K7EKE8	Nectin-2	PVRL2	3.41	0.000949884	0.746
P20701;A0A7I2V4B0;A0A7I2V498;A0A7I2V5G1;B4E021;B4DQ77;I3L468;H3BUT3	P20701;A0A7I2V4B0	Integrin alpha-L	ITGAL	4.6	0.000972233	0.747
A0A3B3IPE9;A0A087WZG4;Q6ZSZ5;A0A804CAZ4;A0A590UK10;M0QZS0	A0A3B3IPE9;A0A087WZG4;Q6ZSZ5;A0A804CAZ4;A0A590UK10;M0QZS0	Rho guanine nucleotide exchange factor 18	ARHGEF18	2.37	0.000973046	0.747
Q9H0A0;E9PMU0;E9PJN6	Q9H0A0	N-acetyltransferase 10	NAT10	2.03	0.00098388	0.748
Q99873;E9PKG1;E9PIX6;E9PQ98;H0YDE4;E9PNR9;E9PMW9;E9PMZ2	Q99873;E9PKG1;E9PIX6;E9PQ98;H0YDE4;E9PNR9	Protein arginine N-methyltransferase 1	PRMT1	1.86	0.000985762	0.748
P07359	P07359	Platelet glycoprotein Ib alpha chain;Glycocalicin	GP1BA	2.53	0.000986903	0.748
Q16790	Q16790	Carbonic anhydrase 9	CA9	4.52	0.000992329	0.748
P41240;H3BUM9;H3BN15;H3BU69;K7ENL8;K7ES68;K7EQY5;P42679	P41240	Tyrosine-protein kinase CSK	CSK	1.65	0.000998526	0.749
sp|A008952|abysis_8952;sp|A010293|abysis_10293;sp|A008904|abysis_8904;sp|A052535|abysis_52535;sp|A052542|abysis_52542	sp|A008952|abysis_8952;sp|A010293|abysis_10293;sp|A008904|abysis_8904			4.25	0.00100788	0.749
sp|A007685|abysis_7685	sp|A007685|abysis_7685			5.21	0.00100813	0.749
Q8TE67	Q8TE67	Epidermal growth factor receptor kinase substrate 8-like protein 3	EPS8L3	4.31	0.00100955	0.75
P84095;F8WET9;B1AH79;G3V4H1	P84095	Rho-related GTP-binding protein RhoG	RHOG	1.93	0.00102999	0.751
P06756;H7BZG1	P06756	Integrin alpha-V;Integrin alpha-V heavy chain;Integrin alpha-V light chain	ITGAV	2.6	0.00103052	0.751
O00468;A0A087X208	O00468;A0A087X208	Agrin;Agrin N-terminal 110 kDa subunit;Agrin C-terminal 110 kDa subunit;Agrin C-terminal 90 kDa fragment;Agrin C-terminal 22 kDa fragment	AGRN	2.09	0.00103396	0.751
A0A0S2Z4G6;P09493;H0YKP3;A0A494C0V8;A0A087WTJ7;H0YL80;H0YLS7;A0A494C0I0	A0A0S2Z4G6;P09493;H0YKP3	Tropomyosin alpha-1 chain	TPM1	3.52	0.00103403	0.751
P23743;G3V4E1;F8W1H7;G3V327;C9JM35;F8W1M3;H0YJH4;F8VNZ9;G3V4I3;F8VWX8;G3V312;H0YJE7	P23743;G3V4E1	Diacylglycerol kinase alpha;Diacylglycerol kinase	DGKA	4.1	0.00103634	0.751
CON__P13647;P13647;F8W0C6;H0YI76;H0YIN9;F8VV57	CON__P13647;P13647	Keratin, type II cytoskeletal 5	KRT5	2.81	0.00103686	0.751
A6NC48;Q10588;H0Y984;H0Y9Q9;H0Y8G4	A6NC48;Q10588;H0Y984	ADP-ribosyl cyclase/cyclic ADP-ribose hydrolase 2	BST1	5.11	0.00105435	0.752
Q6PI78	Q6PI78	Transmembrane protein 65	TMEM65	3.16	0.00105623	0.752
Q5TA45;C9IYS7;A0A087WYI0;J3QRY6;C9J979;E9PNH9;E9PI75;E9PIG1	Q5TA45;C9IYS7;A0A087WYI0;J3QRY6	Integrator complex subunit 11	CPSF3L	3.03	0.00105957	0.752
Q00722;Q9BVT6;H0YNI4;H0YKR9	Q00722	1-phosphatidylinositol 4,5-bisphosphate phosphodiesterase beta-2	PLCB2	3.68	0.00107131	0.753
O43155;A0A804HKH2	O43155	Leucine-rich repeat transmembrane protein FLRT2	FLRT2	2.35	0.00108457	0.754
Q6ZTN6;A0A6E1W3F4;A0A6E1YH78	Q6ZTN6	Ankyrin repeat domain-containing protein 13D	ANKRD13D	2.86	0.00109394	0.754
Q86V87	Q86V87	Protein FAM160B2	FAM160B2	2.48	0.00109958	0.755
Q6P1J9;A0A3B3IRP5;A0A1B0GUB2;A0A2R8YHB3;A0A2R8Y640;A0A3B3ISN2	Q6P1J9;A0A3B3IRP5;A0A1B0GUB2;A0A2R8YHB3	Parafibromin	CDC73	2.23	0.00111621	0.756
Q13952;Q5T6K7;E9PI99;Q5T6K5;A0A0A0MT00;E9PL11;E9PQR2;E9PJA8	Q13952;Q5T6K7;E9PI99;Q5T6K5;A0A0A0MT00	Nuclear transcription factor Y subunit gamma	NFYC	2.38	0.00112013	0.756
O75607	O75607	Nucleoplasmin-3	NPM3	5.3	0.00112095	0.756
Q9HD89	Q9HD89	Resistin	RETN	6.26	0.00112126	0.756
Q9BYK8	Q9BYK8	Helicase with zinc finger domain 2	HELZ2	2.73	0.00112611	0.756
P57735	P57735	Ras-related protein Rab-25	RAB25	5.8	0.00113448	0.757
Q99523;A0A0J9YVX1;A0A0J9YX61	Q99523	Sortilin	SORT1	3.38	0.00114488	0.757
P05121	P05121	Plasminogen activator inhibitor 1	SERPINE1	3.85	0.00114527	0.757
Q6PCE3	Q6PCE3	Glucose 1,6-bisphosphate synthase	PGM2L1	4.32	0.00114744	0.757
O60603;A0A0S2Z4L7;A0A2R8Y4N9	O60603	Toll-like receptor 2	TLR2	3.07	0.00116118	0.758
P12931;A0A8I5KYU4	P12931	Proto-oncogene tyrosine-protein kinase Src	SRC	3.46	0.00116226	0.758
P20020;E7ERY9;H0YHH6;F8W1V5	P20020;E7ERY9	Plasma membrane calcium-transporting ATPase 1;Calcium-transporting ATPase	ATP2B1	1.68	0.00116504	0.758
Q9H0B6;A8MX29;E9PQ02;E9PP09;C9JHT2;E9PM83;E9PI24	Q9H0B6	Kinesin light chain 2	KLC2	3.2	0.00117844	0.759
Q8IZ07;H0YIN8;S4R3D2;F8W150;S4R3U2	Q8IZ07;H0YIN8	Ankyrin repeat domain-containing protein 13A	ANKRD13A	1.63	0.00118099	0.759
P10301	P10301	Ras-related protein R-Ras	RRAS	2.22	0.00119284	0.76
Q9HBI0;B0QYM9;B0QYN0;U3KQ67	Q9HBI0	Gamma-parvin	PARVG	4.85	0.00119725	0.76
Q0VGL1;A0A087WT92;A0A087WV46;C9JXA7;A0A087WVU0	Q0VGL1;A0A087WT92;A0A087WV46;C9JXA7	Ragulator complex protein LAMTOR4;Ragulator complex protein LAMTOR4, N-terminally processed	LAMTOR4	4.15	0.00119966	0.76
Q12996;E9PLP8;E9PJ06;H0YE74	Q12996;E9PLP8	Cleavage stimulation factor subunit 3	CSTF3	2.11	0.00121784	0.761
P51148;K7ENY4;K7ERI8;K7ERQ8;F8VVK3;F8VSF8;K7EIP6	P51148;K7ENY4;K7ERI8;K7ERQ8	Ras-related protein Rab-5C	RAB5C	1.68	0.00122381	0.761
Q08722;A0A2R8Y484;H7BYS8	Q08722;A0A2R8Y484	Leukocyte surface antigen CD47	CD47	2.63	0.00127192	0.763
J3KPC5;X6R8W7;P47736;F2Z357;Q5T3T1	J3KPC5;X6R8W7;P47736;F2Z357	Rap1 GTPase-activating protein 1	RAP1GAP	3.12	0.00127675	0.764
F8W8I6;P31483;E5RGV5;E5RG67;F8WE16	F8W8I6;P31483;E5RGV5	Nucleolysin TIA-1 isoform p40	TIA1	2.86	0.00128136	0.764
P07948;E5RJ37	P07948	Tyrosine-protein kinase Lyn	LYN	1.74	0.00128148	0.764
CON__Q5D862;Q5D862	CON__Q5D862;Q5D862	Filaggrin-2	FLG2	2.62	0.00128505	0.764
K7EK07;P84243;K7EMV3;A0A590UJJ6;B4DEB1;K7ES00;Q6NXT2;K7EP01	K7EK07;P84243;K7EMV3;A0A590UJJ6;B4DEB1;K7ES00;Q6NXT2;K7EP01	Histone H3;Histone H3.3;Histone H3.3C	H3F3B;H3F3A;H3F3C	2.41	0.00129797	0.765
Q9BW30	Q9BW30	Tubulin polymerization-promoting protein family member 3	TPPP3	2.44	0.00129992	0.765
P04275	P04275	von Willebrand factor;von Willebrand antigen 2	VWF	3.01	0.00130431	0.765
Q9BXJ0	Q9BXJ0	Complement C1q tumor necrosis factor-related protein 5	C1QTNF5	4.4	0.00131508	0.765
A0A140T8Z5;A0A140T9R6;P01920;A0A140TA15	A0A140T8Z5;A0A140T9R6;P01920;A0A140TA15	HLA class II histocompatibility antigen, DQ beta 1 chain	HLA-DQB1	4.95	0.00131549	0.765
P40121;E7ENU9;B8ZZL6;H7C0X8	P40121;E7ENU9;B8ZZL6	Macrophage-capping protein	CAPG	2.99	0.00133063	0.766
A6NM71	A6NM71			2.68	0.00136421	0.767
P16234	P16234	Platelet-derived growth factor receptor alpha	PDGFRA	3.61	0.00136538	0.767
P49961;A0A0U1RQZ5;A0A0U1RR44;A0A1W2PQK8	P49961	Ectonucleoside triphosphate diphosphohydrolase 1	ENTPD1	3.81	0.00137151	0.768
O00148;K7EQN7;K7EPJ3;K7EN69;K7ENP6;K7EL56;K7EIL8;F6SXL5	O00148;K7EQN7	ATP-dependent RNA helicase DDX39A	DDX39A	2.3	0.00138507	0.768
sp|A049078|abysis_49078	sp|A049078|abysis_49078			6.71	0.00140766	0.769
Q9BQ39;S4R3V4;S4R3G6	Q9BQ39	ATP-dependent RNA helicase DDX50	DDX50	3.18	0.00141599	0.77
P17301;E7ESP4;E7EMF1;E9PB77;D6RG08	P17301;E7ESP4;E7EMF1	Integrin alpha-2	ITGA2	4.39	0.00142641	0.77
Q8NHV4;G3V2M9;G3V4I9;G3V4L2;G3V2V3	Q8NHV4	Protein NEDD1	NEDD1	2.57	0.00143922	0.77
Q7Z2W9;F5H7V8;H3BUY0	Q7Z2W9;F5H7V8;H3BUY0	39S ribosomal protein L21, mitochondrial	MRPL21	1.63	0.00144026	0.771
Q13094;E7ESF6;E5RKA2	Q13094;E7ESF6	Lymphocyte cytosolic protein 2	LCP2	1.76	0.0014412	0.771
Q9HCG8;B7WP74	Q9HCG8;B7WP74	Pre-mRNA-splicing factor CWC22 homolog	CWC22	2.67	0.00144189	0.771
A0A8I5KW95;Q7LGA3;A0A8I5QKN0;A0A8I5KR52;K7EP71	A0A8I5KW95;Q7LGA3;A0A8I5QKN0;A0A8I5KR52;K7EP71	Heparan sulfate 2-O-sulfotransferase 1	HS2ST1	3.17	0.00144927	0.771
Q6UVY6;A6PVS1	Q6UVY6	DBH-like monooxygenase protein 1	MOXD1	3.73	0.00145014	0.771
P07093;C9JN98;C9K031	P07093;C9JN98	Glia-derived nexin	SERPINE2	5.02	0.00145464	0.771
Q07960;H0YE29;E9PNR6	Q07960;H0YE29;E9PNR6	Rho GTPase-activating protein 1	ARHGAP1	1.45	0.00148663	0.772
Q2NL82;I3L1Q5;I3L4E8	Q2NL82	Pre-rRNA-processing protein TSR1 homolog	TSR1	2.58	0.00151094	0.773
P16989;A0A0D9SEI8	P16989	Y-box-binding protein 3	YBX3	3.1	0.00151147	0.773
Q13077	Q13077	TNF receptor-associated factor 1	TRAF1	3.83	0.00151832	0.773
Q9UKK3	Q9UKK3	Poly [ADP-ribose] polymerase 4	PARP4	2.37	0.00152107	0.774
Q99986;A0A7P0TBE4;A0A7P0TB15;A0A7P0T9T1;A0A7P0T838;A0A7P0TA65;A0A7P0T952;H0YJF7;A0A7P0TA16;A0A7P0T824;A0A7P0TAS8;A0A7P0T9E5;A0A7P0Z462;A0A7P0TAA6;H0YJJ9;A0A7P0T8N0;A0A7P0Z445;A0A7P0T977;A0A7P0T9I1;A0A7P0TBB8;A0A7P0Z3Z7;A0A7P0T925;H0YJ50;A0A7P0Z4A4;A0A7P0TBI6;A0A7P0T9C6;A0A7P0T814;A0A7P0TB08;A0A7P0T9B1;A0A7P0T832;A0A7P0Z4C8;A0A7P0T8M0;A0A7P0T8Z5;A0A7P0T833;A0A7P0TB37;A0A7P0TAI5;A0A7P0Z4P9;A0A7P0TA…	Q99986;A0A7P0TBE4;A0A7P0TB15;A0A7P0T9T1;A0A7P0T838;A0A7P0TA65;A0A7P0T952;H0YJF7;A0A7P0TA16;A0A7P0T824;A0A7P0TAS8;A0A7P0T9E5;A0A7P0Z462;A0A7P0TAA6;H0YJJ9;A0A7P0T8N0;A0A7P0Z445;A0A7P0T977;A0A7P0T9I1;A0A7P0TBB8;A0A7P0Z3Z7;A0A7P0T925;H0YJ50;A0A7P0Z4A4;A0A7P0TBI6;A0A7P0T9C6;A0A7P0T814;A0A7P0TB08	Serine/threonine-protein kinase VRK1	VRK1	2.64	0.00152255	0.774
Q8NG11;A6NEP9;H7BXY6	Q8NG11;A6NEP9;H7BXY6	Tetraspanin-14;Tetraspanin	TSPAN14	3.38	0.00152402	0.774
Q8WVC0	Q8WVC0	RNA polymerase-associated protein LEO1	LEO1	2.33	0.00152453	0.774
Q71UI9;P0C0S5;C9J0D1;A0A494C189;C9J386	Q71UI9;P0C0S5;C9J0D1;A0A494C189;C9J386	Histone H2A.V;Histone H2A.Z;Histone H2A	H2AFV;H2AFZ	3.88	0.00158142	0.776
A0A0G2JMH6;P01903;Q30118;A0A0G2JH46	A0A0G2JMH6;P01903;Q30118;A0A0G2JH46	HLA class II histocompatibility antigen, DR alpha chain	HLA-DRA	2.85	0.00158796	0.776
I3L2C7;P57678;I3L4A4;I3L399;E7EN12;I3L4M4;I3L1J7	I3L2C7;P57678	Gem-associated protein 4	GEMIN4	2.69	0.00158974	0.776
Q08J23;A0A140T9Y7;A0A140T9Z1	Q08J23	tRNA (cytosine(34)-C(5))-methyltransferase	NSUN2	2.87	0.00159628	0.776
sp|A036133|abysis_36133;sp|A023542|abysis_23542;sp|A039947|abysis_39947;sp|A014780|abysis_14780;sp|A006849|abysis_6849;sp|A016376|abysis_16376;sp|A014771|abysis_14771;sp|A016377|abysis_16377;sp|A016791|abysis_16791;sp|A041407|abysis_41407;sp|A020483|abysis_20483;sp|A021568|abysis_21568;sp|A014789|abysis_14789;sp|A016378|abysis_16378;sp|A006805|abysis_6805;sp|A041366|abysis_41366;sp|A079318|abysis…	sp|A036133|abysis_36133;sp|A023542|abysis_23542;sp|A039947|abysis_39947;sp|A014780|abysis_14780;sp|A006849|abysis_6849;sp|A016376|abysis_16376;sp|A014771|abysis_14771;sp|A016377|abysis_16377;sp|A016791|abysis_16791;sp|A041407|abysis_41407;sp|A020483|abysis_20483;sp|A021568|abysis_21568;sp|A014789|abysis_14789;sp|A016378|abysis_16378;sp|A006805|abysis_6805;sp|A041366|abysis_41366;sp|A079318|abysis…			5.23	0.00159635	0.776
O60671	O60671	Cell cycle checkpoint protein RAD1	RAD1	3.26	0.00160174	0.776
sp|A012597|abysis_12597;sp|A012611|abysis_12611;sp|A012580|abysis_12580;sp|A004273|abysis_4273;sp|A065221|abysis_65221;sp|A058057|abysis_58057;sp|A068857|abysis_68857;sp|A069167|abysis_69167;sp|A065215|abysis_65215;sp|A024078|abysis_24078;sp|A081105|abysis_81105;sp|A004275|abysis_4275;sp|A068855|abysis_68855;sp|A023480|abysis_23480;sp|A068856|abysis_68856;sp|A080668|abysis_80668;sp|A017206|abysis…	sp|A012597|abysis_12597;sp|A012611|abysis_12611;sp|A012580|abysis_12580			5.45	0.00161606	0.777
Q9UK05	Q9UK05	Growth/differentiation factor 2	GDF2	2	0.00161628	0.777
H9KV31;O15394	H9KV31;O15394	Neural cell adhesion molecule 2	NCAM2	1.79	0.00162476	0.777
Q5R3K3;Q5R3K2	Q5R3K3;Q5R3K2	Protein FAM26F	FAM26F	4.62	0.00162614	0.777
Q8IYM9;C9JIU5;C9JWC5;C9J060;H7BZD3;H7C376;H7C262;H7C2K0	Q8IYM9;C9JIU5;C9JWC5;C9J060	E3 ubiquitin-protein ligase TRIM22	TRIM22	3.31	0.00163432	0.777
Q92598;A0A0A0MSM0;Q5TBM3;R4GN69	Q92598;A0A0A0MSM0	Heat shock protein 105 kDa	HSPH1	1.65	0.00163874	0.778
P13928;A0A087WTN9;A0A075B765	P13928;A0A087WTN9;A0A075B765	Annexin A8;Annexin	ANXA8	4.12	0.00164902	0.778
P12111;E7ENL6;A0A804HKC7;A0A804HKQ0	P12111	Collagen alpha-3(VI) chain	COL6A3	2.19	0.0016694	0.779
P18206;A0A096LPE1	P18206	Vinculin	VCL	1.4	0.00167131	0.779
Q9H4L5	Q9H4L5	Oxysterol-binding protein-related protein 3	OSBPL3	2.18	0.00168067	0.779
Q96LD4;K7EJ63	Q96LD4	Tripartite motif-containing protein 47	TRIM47	2.23	0.00168758	0.779
O94776	O94776	Metastasis-associated protein MTA2	MTA2	1.78	0.00169376	0.779
Q6NUK1	Q6NUK1	Calcium-binding mitochondrial carrier protein SCaMC-1	SLC25A24	3.87	0.00171202	0.78
Q9NZU5;B4DEY6;H7C3D2;C9IYS1;F8WB09	Q9NZU5;B4DEY6;H7C3D2;C9IYS1	LIM and cysteine-rich domains protein 1	LMCD1	2	0.00171774	0.78
O95352;C9JFF4;C9J415;C9JE55;C9JNU2;C9JKA3;H7C2R3;H7BZ92;H7C059;H7C2J8;C9JGL2;H7C369	O95352	Ubiquitin-like modifier-activating enzyme ATG7	ATG7	1.82	0.00172294	0.78
Q9HB58;G5E9C0;E7EM70;C9JZQ4	Q9HB58;G5E9C0	Sp110 nuclear body protein	SP110	2.81	0.00178864	0.782
P63261;A0A804GS07;I3L3I0;I3L1U9;I3L3R2;J3KT65	P63261;A0A804GS07;I3L3I0;I3L1U9	Actin, cytoplasmic 2;Actin, cytoplasmic 2, N-terminally processed	ACTG1	2.4	0.00179098	0.782
P29590;H3BT29;H3BVD2	P29590	Protein PML	PML	1.65	0.00180574	0.783
Q9NPF4;G3V445;G3V249	Q9NPF4	Probable tRNA N6-adenosine threonylcarbamoyltransferase	OSGEP	1.87	0.00181055	0.783
Q8TDZ2;H0Y6Z4;Q5TED7	Q8TDZ2	Protein-methionine sulfoxide oxidase MICAL1	MICAL1	4.43	0.00181202	0.783
P01833	P01833	Polymeric immunoglobulin receptor;Secretory component	PIGR	2.4	0.00181911	0.783
D6RAM3;Q7L591;D6RC22;D6R951;D6R977;D6RAZ9	D6RAM3;Q7L591	Docking protein 3	DOK3	3.02	0.0018291	0.784
Q9H9Y6;H7C0D9;C9JS83;C9JJG2;F8WDS4;F8WAK7;F8WBB9;F8WCS3	Q9H9Y6	DNA-directed RNA polymerase I subunit RPA2	POLR1B	3.15	0.00183792	0.784
Q8NF50;A2A369;E9PDJ4;A0A804HK14;A0A8I5KQK5;C9J7A3;F8WC95	Q8NF50;A2A369	Dedicator of cytokinesis protein 8	DOCK8	3.58	0.00184021	0.784
A0A2R8Y891;P08237;F8VZI0;F8VZQ1;F8VX13;F8VP00;F8VW30;F8VSF7;F8VTQ3;F8VUB8;F8VYK8;H0YHB8;F8VVE3	A0A2R8Y891;P08237;F8VZI0	ATP-dependent 6-phosphofructokinase, muscle type	PFKM	2.21	0.00184553	0.784
O75694;E9PF10;D6RA13	O75694;E9PF10	Nuclear pore complex protein Nup155	NUP155	1.41	0.0018651	0.785
sp|A058267|abysis_58267;sp|A034278|abysis_34278;sp|A062158|abysis_62158;sp|A037876|abysis_37876;sp|A068649|abysis_68649;sp|A062322|abysis_62322;sp|A068634|abysis_68634;sp|A068471|abysis_68471	sp|A058267|abysis_58267;sp|A034278|abysis_34278			4.68	0.00186624	0.785
Q6ICG6;B0QY16;B0QY20;B0QY18;V9GYW7;V9GZ62;H7C1U5	Q6ICG6;B0QY16;B0QY20	Uncharacterized protein KIAA0930	KIAA0930	2.42	0.00187264	0.785
Q9NTZ6;A6PVI1;A6PVI0;Q5JX62	Q9NTZ6	RNA-binding protein 12	RBM12	2.01	0.00187864	0.785
P61353;K7ELC7;K7EQQ9;K7ERY7	P61353;K7ELC7	60S ribosomal protein L27	RPL27	1.58	0.00187942	0.785
Q03169;H0YLC0;H0YKR7;H0YKI8;H0YM45;H0YL88;H0YKY9	Q03169	Tumor necrosis factor alpha-induced protein 2	TNFAIP2	2.52	0.0018812	0.785
P29218;H0YBL1;E5RG13;E5RIP7;E5RI82;E5RGY4;E5RG94;E5RHE9;E5RIF4	P29218;H0YBL1;E5RG13;E5RIP7;E5RI82;E5RGY4;E5RG94;E5RHE9	Inositol monophosphatase 1	IMPA1	1.73	0.00188729	0.785
P40429;M0QYS1;A0A7I2V2L9;A0A7I2V5L3;Q6NVV1;M0QZU1;A0A096LPE0	P40429;M0QYS1;A0A7I2V2L9;A0A7I2V5L3	60S ribosomal protein L13a	RPL13A	1.72	0.0019088	0.786
O75792;A0A2R8Y606;A0A2R8Y658	O75792	Ribonuclease H2 subunit A	RNASEH2A	4.08	0.00192698	0.786
Q8IWB1;X6RK76;REV__I3NI21;REV__I3L288;REV__Q96B96;REV__I3NI23	Q8IWB1;X6RK76	Inositol 1,4,5-trisphosphate receptor-interacting protein	ITPRIP	2.14	0.00193353	0.786
sp|A080372|abysis_80372;sp|A008656|abysis_8656;sp|A015254|abysis_15254;sp|A045627|abysis_45627;sp|A045582|abysis_45582;sp|A004980|abysis_4980;sp|A004819|abysis_4819;sp|A004973|abysis_4973;sp|A033540|abysis_33540;sp|A007569|abysis_7569;sp|A083255|abysis_83255;sp|A082458|abysis_82458;sp|A023481|abysis_23481;sp|A063992|abysis_63992;sp|A061213|abysis_61213;sp|A063304|abysis_63304;sp|A087113|abysis_87…	sp|A080372|abysis_80372;sp|A008656|abysis_8656			5.44	0.00195372	0.787
O00534;B4DHS6	O00534;B4DHS6	von Willebrand factor A domain-containing protein 5A	VWA5A	2.73	0.0019637	0.787
sp|A009059|abysis_9059;sp|A012335|abysis_12335;sp|A082322|abysis_82322;sp|A040074|abysis_40074;sp|A007094|abysis_7094;sp|A069679|abysis_69679;sp|A069385|abysis_69385;sp|A069299|abysis_69299;sp|A040010|abysis_40010;sp|A040006|abysis_40006;sp|A039437|abysis_39437;sp|A040009|abysis_40009;sp|A024457|abysis_24457;sp|A044290|abysis_44290;sp|A020808|abysis_20808;sp|A024194|abysis_24194;sp|A037654|abysis…	sp|A009059|abysis_9059			4.12	0.00197151	0.787
Q14019;H3BT58	Q14019;H3BT58	Coactosin-like protein	COTL1	1.68	0.00197606	0.788
P19971;C9JGI3;A0A494C0L6;A0A494BZZ4;A0A494C1N7;A0A494C1L9;A0A494C0A4;A0A494C0L3	P19971;C9JGI3;A0A494C0L6	Thymidine phosphorylase	TYMP	1.87	0.00197657	0.788
O60264	O60264	SWI/SNF-related matrix-associated actin-dependent regulator of chromatin subfamily A member 5	SMARCA5	3.21	0.00198618	0.788
Q6YHK3	Q6YHK3	CD109 antigen	CD109	2.25	0.00198874	0.788
P21730	P21730	C5a anaphylatoxin chemotactic receptor 1	C5AR1	4.2	0.00201056	0.788
P07585;F8VXZ8;F8VUF6;F8VX58;F8VNV6;H0YI87;A0A7I2PRI8;F8VNW0;F8VU58;F8VSI3	P07585;F8VXZ8;F8VUF6	Decorin	DCN	2.46	0.00202596	0.789
O00425;F8WD15	O00425	Insulin-like growth factor 2 mRNA-binding protein 3	IGF2BP3	2.88	0.0020414	0.789
Q5SNT2;H0Y4R5	Q5SNT2;H0Y4R5	Transmembrane protein 201	TMEM201	2.86	0.00205533	0.79
Q96P53;A0A087WZX3	Q96P53	WD repeat and FYVE domain-containing protein 2	WDFY2	2.41	0.00206034	0.79
E7EWM3;Q8NF64	E7EWM3;Q8NF64	Zinc finger MIZ domain-containing protein 2	ZMIZ2	3.28	0.00206846	0.79
P16284;A0A075B727;A0A075B728;A0A075B737	P16284	Platelet endothelial cell adhesion molecule	PECAM1	2.05	0.00207165	0.79
O15460;E7ENX0;E7EPI9;C9JX45;A8MXE0;E7ERI1;C9JCP0;C9JN43;C9JIG4;C9JFJ1	O15460	Prolyl 4-hydroxylase subunit alpha-2	P4HA2	2.72	0.00208823	0.79
P19174;V9GY71;V9GYH5;V9GY63;A0A0D9SEK2	P19174	1-phosphatidylinositol 4,5-bisphosphate phosphodiesterase gamma-1	PLCG1	1.82	0.00208923	0.79
CON__Q9C075;Q9C075;Q9UFN7;K7EPI0	CON__Q9C075;Q9C075	Keratin, type I cytoskeletal 23	KRT23	4.79	0.00209306	0.79
Q9NXH8	Q9NXH8	Torsin-4A	TOR4A	2.92	0.00209835	0.791
A0A7P0TB24;A0A7P0T9J6;Q9NXE4;H7C1Q6;A0A7P0TB44;H7C0W5;H7C235;H7C2J2;A0A7P0Z453;C9J647;A0A7P0TAZ0;A0A7P0T8J0;F8WF03;F2Z2I0;F2Z2W5;H7C2E2	A0A7P0TB24;A0A7P0T9J6;Q9NXE4;H7C1Q6;A0A7P0TB44	Sphingomyelin phosphodiesterase 4	SMPD4	2.61	0.00212921	0.791
A5YKK6;H3BMZ2;H3BVC9;H3BNB1;H3BTH2;H3BR89;H3BMH0;H3BT18;H3BU44	A5YKK6	CCR4-NOT transcription complex subunit 1	CNOT1	1.67	0.00213061	0.791
O95989	O95989	Diphosphoinositol polyphosphate phosphohydrolase 1	NUDT3	5.27	0.00213608	0.792
P01011;G3V595	P01011;G3V595	Alpha-1-antichymotrypsin;Alpha-1-antichymotrypsin His-Pro-less	SERPINA3	1.62	0.00214243	0.792
Q5TEC6;A0A590UJL8	Q5TEC6	Histone H3	HIST2H3PS2	4.67	0.00215879	0.792
P69891;A0A2R8Y7X9;A0A0J9YYA3	P69891;A0A2R8Y7X9	Hemoglobin subunit gamma-1	HBG1	3.46	0.002167	0.792
Q8IYU8;A0A0A0MTD5	Q8IYU8	Calcium uptake protein 2, mitochondrial	MICU2	3.73	0.0021721	0.792
Q6ZT62;A0A2R8Y5V0;B1AHD3;A0A3B3IU28	Q6ZT62			1.82	0.00219439	0.793
A0A7P0T893;O43823;M0QX51;A0A7P0TBC8	A0A7P0T893;O43823	A-kinase anchor protein 8	AKAP8	1.92	0.00219524	0.793
Q9BUQ8;H0YI52;H0YIL9;F8VVA2	Q9BUQ8	Probable ATP-dependent RNA helicase DDX23	DDX23	1.4	0.00220846	0.793
Q9NRG9;F8VZ44;H3BU82;F8VUB6	Q9NRG9;F8VZ44;H3BU82	Aladin	AAAS	1.85	0.00222034	0.793
O60341;A0A8I5KXU4;R4GMQ1;A0A8I5KV76;A0A8I5KVZ4;A0A8I5KSH0;A0A8I5KT29;A0A8I5QKM3;A0A8I5KRB8;A0A8I5QJJ5;A0A8I5KRX9;A0A8I5KRF4;A0A8I5KQU6;A0A8I5QJR3;A0A8I5KPV0;A0A8I5KTR5;A0A8I5KRC9;R4GMP9;A0A8I5KSI8;A0A8I5QJX1;A0A8I5KUU0	O60341;A0A8I5KXU4;R4GMQ1;A0A8I5KV76;A0A8I5KVZ4;A0A8I5KSH0;A0A8I5KT29;A0A8I5QKM3;A0A8I5KRB8;A0A8I5QJJ5;A0A8I5KRX9;A0A8I5KRF4;A0A8I5KQU6;A0A8I5QJR3;A0A8I5KPV0;A0A8I5KTR5;A0A8I5KRC9	Lysine-specific histone demethylase 1A	KDM1A	1.71	0.0022246	0.794
O60524;G3V5V3;G3V4D9;G3V547	O60524;G3V5V3	Nuclear export mediator factor NEMF	NEMF	2.87	0.00222965	0.794
Q5VW38;G5E994;U3KQD2	Q5VW38;G5E994;U3KQD2	Protein GPR107	GPR107	3.65	0.00223535	0.794
sp|A081267|abysis_81267;sp|A014674|abysis_14674;sp|A022709|abysis_22709;sp|A007349|abysis_7349	sp|A081267|abysis_81267			3.76	0.00224679	0.794
P16422;B5MCA4;C9JKY3	P16422;B5MCA4	Epithelial cell adhesion molecule	EPCAM	4.28	0.00225345	0.794
P54803;A0A087WX10;G3V5E8;G3V4M2	P54803;A0A087WX10	Galactocerebrosidase	GALC	3.06	0.00225623	0.794
Q96S52	Q96S52	GPI transamidase component PIG-S	PIGS	2.95	0.00225879	0.794
Q96BX8;K7EPX7;K7EKK6;K7ELS3;K7ESA9;K7ESI3;Q86TA1	Q96BX8	MOB kinase activator 3A	MOB3A	3.57	0.00225971	0.794
P08572;A0A3B3IS47;A0A3B3ITQ8;A2A352;A0A087WY39;A0A3B3IS04;A0A3B3ITN7;A0A3B3IRV2;A0A3B3IT80	P08572	Collagen alpha-2(IV) chain;Canstatin	COL4A2	3.24	0.00226268	0.794
P15586;H7C3P4;F6S8M0;H0YFA9;F5H4C6	P15586;H7C3P4;F6S8M0;H0YFA9	N-acetylglucosamine-6-sulfatase	GNS	2.15	0.0022795	0.795
O43143	O43143	Pre-mRNA-splicing factor ATP-dependent RNA helicase DHX15	DHX15	1.52	0.00228791	0.795
sp|A002539|abysis_2539;sp|A083514|abysis_83514;sp|A082834|abysis_82834	sp|A002539|abysis_2539;sp|A083514|abysis_83514;sp|A082834|abysis_82834			5.78	0.00230417	0.795
P80511	P80511	Protein S100-A12;Calcitermin	S100A12	6.49	0.00230633	0.795
O60831;A6NP52	O60831;A6NP52	PRA1 family protein 2	PRAF2	5.53	0.00231221	0.795
Q9NTJ3;E9PD53;C9JR83;C9JVD8;C9J578;C9J9E4;C9JWF0;C9IYK2;C9JJ64	Q9NTJ3;E9PD53	Structural maintenance of chromosomes protein 4;Structural maintenance of chromosomes protein	SMC4	2.58	0.00232043	0.796
A0A1X7SBR3;A0A1W2PR46;P14136;A0A1X7SCE1;A0A1W2PRT3;K7EJU1;K7EKH9;K7ELP4;B4DIR1;K7EKD1;K7EJK1;A0A1W2PS58;A0A1W2PPA3;K7EPT8	A0A1X7SBR3;A0A1W2PR46;P14136;A0A1X7SCE1;A0A1W2PRT3;K7EJU1;K7EKH9;K7ELP4	Glial fibrillary acidic protein	GFAP	5.86	0.00232378	0.796
Q9P0M6;A0A7I2V412;Q5SQT3;A0A7I2YQD6;A0A7I2V633;A0A7I2V3B3;A0A7I2V3C2;A0A7I2V583	Q9P0M6;A0A7I2V412;Q5SQT3;A0A7I2YQD6	Core histone macro-H2A.2;Histone H2A	H2AFY2	5.37	0.00233555	0.796
O00154;Q6ZUV0	O00154	Cytosolic acyl coenzyme A thioester hydrolase	ACOT7	2.13	0.00233716	0.796
G3V3H3;G3V5R9;G3V2E7;E7EVH7;Q07866;F8W6L3;G5E9S8;G3V2P7;H0YJU9;H0YJT3;H0YJL0;H0YGB8	G3V3H3;G3V5R9;G3V2E7;E7EVH7;Q07866;F8W6L3;G5E9S8	Kinesin light chain 1	KLC1	1.76	0.00234923	0.796
Q9UK59;F8WAY1	Q9UK59	Lariat debranching enzyme	DBR1	2.53	0.00235821	0.796
Q14289;C9JHV9;E5RJ77;E5RK84;E5RHL2;H0YB74	Q14289	Protein-tyrosine kinase 2-beta	PTK2B	2.53	0.00236002	0.796
P12544	P12544	Granzyme A	GZMA	4.27	0.00237067	0.797
P23528;E9PP50;E9PK25;G3V1A4;E9PS23;E9PLJ3	P23528;E9PP50;E9PK25;G3V1A4;E9PS23	Cofilin-1	CFL1	1.62	0.0023749	0.797
P55809;E9PDW2	P55809;E9PDW2	Succinyl-CoA:3-ketoacid coenzyme A transferase 1, mitochondrial	OXCT1	3.77	0.00239452	0.797
P21757;B4DDJ5;H0YBY2;E5RFW8;E5RI91;E5RFI4	P21757;B4DDJ5	Macrophage scavenger receptor types I and II	MSR1	2.95	0.00239717	0.797
A0A075B7B4;Q14164	A0A075B7B4;Q14164	Inhibitor of nuclear factor kappa-B kinase subunit epsilon	IKBKE	3.12	0.00242313	0.798
B4DLR8;P15559;H3BRK3;H3BNV2	B4DLR8;P15559;H3BRK3;H3BNV2	NAD(P)H dehydrogenase [quinone] 1	NQO1	3.98	0.00242759	0.798
A0A2R8YD85;Q96BY6;H0YFC5;H7C0I3;F8WE73;A0A2R8Y5U0	A0A2R8YD85;Q96BY6	Dedicator of cytokinesis protein 10	DOCK10	1.78	0.0024279	0.798
Q6P2P2;D6REN0	Q6P2P2	Putative protein arginine N-methyltransferase 9	PRMT9	3.06	0.00245078	0.798
Q15208	Q15208	Serine/threonine-protein kinase 38	STK38	2.54	0.00246153	0.799
Q9H4B6;H0YJH0;H0YJ02;G3V453;H0YJT4	Q9H4B6;H0YJH0	Protein salvador homolog 1	SAV1	3.19	0.00247012	0.799
Q14566	Q14566	DNA replication licensing factor MCM6	MCM6	3.16	0.00247119	0.799
A0A5F9ZHY7;Q8WY22	A0A5F9ZHY7;Q8WY22	BRI3-binding protein	BRI3BP	3.97	0.00248212	0.799
Q8IUI8;J3KST8;J3QLS9	Q8IUI8	Cytokine receptor-like factor 3	CRLF3	1.95	0.00249159	0.799
Q8WVQ1;K7EN15	Q8WVQ1;K7EN15	Soluble calcium-activated nucleotidase 1	CANT1	2.84	0.00253062	0.8
P36543;C9J8H1	P36543;C9J8H1	V-type proton ATPase subunit E 1	ATP6V1E1	1.66	0.00253264	0.8
Q9NQC7;J3KRR7;H3BS09;H3BSW9;J3QKR2	Q9NQC7;J3KRR7;H3BS09	Ubiquitin carboxyl-terminal hydrolase CYLD	CYLD	1.85	0.00253511	0.8
Q9UH65	Q9UH65	Switch-associated protein 70	SWAP70	1.69	0.00256145	0.8
A0A0U1RQP1;Q05193;A0A0D9SFE4	A0A0U1RQP1;Q05193;A0A0D9SFE4	Dynamin-1	DNM1	3.59	0.00258362	0.801
A0A087WXL6;B7Z879;A0A0G2JS92;A0A087X2J4	A0A087WXL6;B7Z879		VPS11	1.58	0.00261273	0.801
Q12805;A0A0U1RQV3;Q580Q6;C9JQX7;C9J4J8;C9JPZ9;C9JUM4	Q12805;A0A0U1RQV3	EGF-containing fibulin-like extracellular matrix protein 1	EFEMP1	3	0.00262658	0.802
B3KP96;H0Y626;O95361;K7EL43;K7ENN8;J3QL38;Q309B1	B3KP96;H0Y626;O95361;K7EL43;K7ENN8	Tripartite motif-containing protein 16	TRIM16	2.37	0.00263889	0.802
sp|A014888|abysis_14888;sp|A043145|abysis_43145	sp|A014888|abysis_14888			3.02	0.00267412	0.803
Q3ZAQ7	Q3ZAQ7	Vacuolar ATPase assembly integral membrane protein VMA21	VMA21	4.68	0.00269948	0.803
U3KQU4;O14569	U3KQU4;O14569	Cytochrome b561 domain-containing protein 2	CYB561D2	3.27	0.0027001	0.803
P49184;A6QRJ0;Q5HY40;E7ESG1;E7EUJ0	P49184;A6QRJ0;Q5HY40	Deoxyribonuclease-1-like 1	DNASE1L1	2.87	0.00271784	0.803
P17900;H0YBY3;E5RJD0	P17900	Ganglioside GM2 activator;Ganglioside GM2 activator isoform short	GM2A	3.27	0.00272806	0.803
O43924;B8ZZK5;C9IZ52	O43924;B8ZZK5;C9IZ52	Retinal rod rhodopsin-sensitive cGMP 3,5-cyclic phosphodiesterase subunit delta	PDE6D	4.46	0.00273146	0.804
Q15019;C9JB25;C9J938;C9IZU3;C9JQJ4;C9JZI2;A0A1B0GXJ2;C9JFT1;F8WB65;C9JT15;C9JSE7	Q15019	Septin-2	37500	1.66	0.00276395	0.804
Q08AF3;B4E128;K7EJJ3	Q08AF3;B4E128	Schlafen family member 5	SLFN5	2.74	0.00277673	0.804
Q16831;C9J486;C9JIP2;B4DND0;F8WD51;C9K0J2	Q16831;C9J486;C9JIP2;B4DND0	Uridine phosphorylase 1	UPP1	2.97	0.00277914	0.804
Q16204	Q16204	Coiled-coil domain-containing protein 6	CCDC6	1.65	0.00278024	0.804
Q9BXP2;C9JBD8;C9JMQ7;C9J0I5	Q9BXP2	Solute carrier family 12 member 9	SLC12A9	2.63	0.00279473	0.805
sp|A081251|abysis_81251;sp|A045371|abysis_45371	sp|A081251|abysis_81251;sp|A045371|abysis_45371			1.85	0.0028075	0.805
Q14699;G3XAJ6;C9JHG2;C9JRN3;C9JWQ9;F8WAR1;U3KPZ2	Q14699;G3XAJ6;C9JHG2	Raftlin	RFTN1	2.07	0.00282085	0.805
Q06481;E9PQS3;E9PK76;E9PSC7	Q06481	Amyloid-like protein 2	APLP2	2.95	0.00284423	0.805
Q14146	Q14146	Unhealthy ribosome biogenesis protein 2 homolog	URB2	3.21	0.00284516	0.805
Q9BXR0;K7ESP6;K7EJ21;K7EPI1;K7EL95	Q9BXR0;K7ESP6	Queuine tRNA-ribosyltransferase	QTRT1	1.96	0.00285513	0.806
Q8WUA7;A0A0A0MRY0;B0QYI1;F8WDP1	Q8WUA7;A0A0A0MRY0;B0QYI1	TBC1 domain family member 22A	TBC1D22A	2.21	0.00288682	0.806
Q9Y2P8;Q5VZU3;Q5VZU2;Q5VYW8	Q9Y2P8;Q5VZU3	RNA 3-terminal phosphate cyclase-like protein	RCL1	3.17	0.00293096	0.807
A1A4S6;H0Y8W5	A1A4S6	Rho GTPase-activating protein 10	ARHGAP10	2.02	0.00293356	0.807
P02686;J3QQK6;J3QL64;A8MZH3;E9PJ72;C9J6H1;J3KS94;J3QKN5	P02686;J3QQK6;J3QL64;A8MZH3;E9PJ72	Myelin basic protein	MBP	5.25	0.00295722	0.807
Q92608;E5RFJ0;A0A3B3ISB1;H0YB76;A0A3B3IRS9	Q92608;E5RFJ0	Dedicator of cytokinesis protein 2	DOCK2	3.7	0.00296212	0.807
Q15057;A0A0U1RQT1;H7C3Q8;A0A5F9ZHJ9;H7C3K3;F8WAU0;C9J8L1	Q15057;A0A0U1RQT1	Arf-GAP with coiled-coil, ANK repeat and PH domain-containing protein 2	ACAP2	2.55	0.00296242	0.807
Q13286;A0A1B0GWD3;A0A1B0GV71;A0A1B0GW34;H3BR00;O95090;H3BQ48;A0A1B0GV41;Q9UBD8;H3BNK7;A0A1B0GWH8;H3BPL0;Q9UP10;Q9UBH5;A0A0D9SF04;H3BR84;A0A1B0GUU4	Q13286;A0A1B0GWD3;A0A1B0GV71;A0A1B0GW34;H3BR00;O95090;H3BQ48;A0A1B0GV41;Q9UBD8;H3BNK7;A0A1B0GWH8;H3BPL0;Q9UP10;Q9UBH5;A0A0D9SF04;H3BR84	Battenin	CLN3	3.58	0.00296916	0.807
O15118;K7EQ23	O15118;K7EQ23	Niemann-Pick C1 protein	NPC1	2.57	0.00297787	0.808
P23946	P23946	Chymase	CMA1	4.25	0.00298857	0.808
O60861;A0A0A0MS68;J3KS47	O60861	Growth arrest-specific protein 7	GAS7	3.37	0.00298996	0.808
Q9NRY6;I3L161;I3NI29;I3L3X5;I3L4F5	Q9NRY6;I3L161;I3NI29;I3L3X5	Phospholipid scramblase 3	PLSCR3;TMEM256-PLSCR3	4.63	0.00299637	0.808
CON__P12763	CON__P12763			5.1	0.00300471	0.808
Q8N960;A0A6Q8PF83;A0A6Q8PH95;A0A6Q8PGD1;D6REX9;A0A6Q8PHT7;A0A6Q8PG38	Q8N960;A0A6Q8PF83;A0A6Q8PH95;A0A6Q8PGD1;D6REX9	Centrosomal protein of 120 kDa	CEP120	2.87	0.00302395	0.808
Q562R1	Q562R1	Beta-actin-like protein 2	ACTBL2	3.87	0.00302606	0.808
A0A1B0GU45;Q12912;F8W9L6;F5H006;G3V513;H0YJC6;H0YJ39;F8VRE4;G3V2F6	A0A1B0GU45;Q12912;F8W9L6;F5H006	Lymphoid-restricted membrane protein;Processed lymphoid-restricted membrane protein	LRMP	6.19	0.00303628	0.808
CON__Q32PJ2	CON__Q32PJ2			2.75	0.00307436	0.809
Q3SXM5;H3BQI7;H3BT52;H3BNH5	Q3SXM5	Inactive hydroxysteroid dehydrogenase-like protein 1	HSDL1	2.02	0.00310215	0.809
P98095;H7C1A3;H7BXL0	P98095	Fibulin-2	FBLN2	2.44	0.00310439	0.809
Q14392;C9JYU3	Q14392	Leucine-rich repeat-containing protein 32	LRRC32	2.67	0.00310773	0.809
Q9H6R4;A0A0A0MRW6;A0A0C4DFX0	Q9H6R4;A0A0A0MRW6	Nucleolar protein 6	NOL6	2.17	0.00312172	0.81
Q9NZM1;H0YD14;REV__H0YEL7;REV__A0A5F9ZHH9;REV__A0A5F9ZHJ7	Q9NZM1;H0YD14	Myoferlin	MYOF	3.99	0.00314991	0.81
Q86Y82;B1AJQ6	Q86Y82;B1AJQ6	Syntaxin-12	STX12	1.7	0.00315071	0.81
F5GZS6;A0A7P0Z4A0;A0A7P0TAN7;J3KPF3;A0A7P0Z4P5;P08195;A0A7P0T9F7;F5GZI0;F5H056;A0A7P0TAT7	F5GZS6;A0A7P0Z4A0;A0A7P0TAN7;J3KPF3;A0A7P0Z4P5;P08195;A0A7P0T9F7;F5GZI0;F5H056;A0A7P0TAT7	4F2 cell-surface antigen heavy chain	SLC3A2	2.46	0.00316591	0.81
Q13868;A3KFL5	Q13868;A3KFL5	Exosome complex component RRP4	EXOSC2	1.94	0.00317001	0.81
Q96S97;A0A494C017;C9JJV6;C9JZL8;A0A499FIY8;C9JC07	Q96S97;A0A494C017;C9JJV6;C9JZL8;A0A499FIY8;C9JC07	Myeloid-associated differentiation marker	MYADM	4.58	0.00317174	0.81
A0A804HLC1;Q8WXF7;G3V5T4;A0A6I8PUC8;A0A6I8PIS8	A0A804HLC1;Q8WXF7;G3V5T4;A0A6I8PUC8	Atlastin-1	ATL1	4.28	0.00317762	0.81
Q92918	Q92918	Mitogen-activated protein kinase kinase kinase kinase 1	MAP4K1	3.34	0.00318917	0.811
Q02880;E9PCY5	Q02880;E9PCY5	DNA topoisomerase 2-beta;DNA topoisomerase 2	TOP2B	2.48	0.00324849	0.811
E9PSI1;E9PQ80;E9PQI5;H0YI89	E9PSI1;E9PQ80		CHMP4A	1.84	0.00326989	0.812
P12110;C9JH44;H7C0M5	P12110	Collagen alpha-2(VI) chain	COL6A2	2.33	0.00328991	0.812
Q9Y2H0;A0A0B4J2C2;F8WF49;A0A087X246;A0A087WWE6	Q9Y2H0;A0A0B4J2C2;F8WF49	Disks large-associated protein 4	DLGAP4	2.14	0.00330554	0.812
P12314;A0A0A0MRM3;Q92637;A0A087WXZ6;A0A087WVS4;A0A087WUG7;C9JSN8	P12314;A0A0A0MRM3;Q92637;A0A087WXZ6	High affinity immunoglobulin gamma Fc receptor I;High affinity immunoglobulin gamma Fc receptor IB	FCGR1A;FCGR1B	5.22	0.00330992	0.812
C9J2V2;A0A087X1B1;A0A8I5KQX1;Q9Y6K9;D3DWY0;A0A087X0G7;A0A087WUW6;A0A8I5KQX5;C9JN51;C9JH59;A0A8I5KYQ7;C9JCG6;A0A8I5KRU9;A0A087X1K7	C9J2V2;A0A087X1B1;A0A8I5KQX1;Q9Y6K9;D3DWY0;A0A087X0G7;A0A087WUW6;A0A8I5KQX5	NF-kappa-B essential modulator	IKBKG	2.56	0.00333424	0.813
P55786;E9PLK3;A0A7I2V3W8;A0A7I2V389;E9PPZ2;A0A7I2V604;E9PP11;H0YDG0;A0A7I2V5D4;E9PJ74;E9PRQ5;E9PPD4;E9PJY4;H0YCQ5;A0A7I2V5M8;A0A7I2YQS3;E9PJF9;E9PI82	P55786;E9PLK3;A0A7I2V3W8;A0A7I2V389	Puromycin-sensitive aminopeptidase	NPEPPS	1.48	0.00333799	0.813
Q96S59	Q96S59	Ran-binding protein 9	RANBP9	2.34	0.00335842	0.813
Q8TDQ7;V9GYK3;V9GYW0	Q8TDQ7	Glucosamine-6-phosphate isomerase 2	GNPDA2	2.69	0.00336169	0.813
O75695	O75695	Protein XRP2	RP2	1.6	0.0033636	0.813
sp|A009620|abysis_9620;sp|A009608|abysis_9608;sp|A072660|abysis_72660	sp|A009620|abysis_9620;sp|A009608|abysis_9608			4.45	0.00336662	0.813
O43293;M0R0D0;M0QYW5	O43293	Death-associated protein kinase 3	DAPK3	2.54	0.00337281	0.813
P06702	P06702	Protein S100-A9	S100A9	2.17	0.0034166	0.814
Q8ND24;E9PN76;E9PRE9	Q8ND24;E9PN76	RING finger protein 214	RNF214	2.09	0.00345762	0.814
P43353;A0A087X2D4;A0A087WUF8;A0A087X192;A0A087WTE0	P43353;A0A087X2D4	Aldehyde dehydrogenase family 3 member B1	ALDH3B1	3.31	0.00346065	0.814
P81605	P81605	Dermcidin;Survival-promoting peptide;DCD-1	DCD	2.33	0.00348656	0.815
Q16512;K7EM57;K7EL10;K7EKY9	Q16512	Serine/threonine-protein kinase N1	PKN1	2.65	0.00348934	0.815
J3KN66	J3KN66		TOR1AIP1	2.98	0.00353442	0.815
P23470	P23470	Receptor-type tyrosine-protein phosphatase gamma	PTPRG	2.62	0.00356991	0.816
P11678	P11678	Eosinophil peroxidase;Eosinophil peroxidase light chain;Eosinophil peroxidase heavy chain	EPX	3.75	0.00357953	0.816
O75558	O75558	Syntaxin-11	STX11	2.51	0.00358156	0.816
Q9NR97	Q9NR97	Toll-like receptor 8	TLR8	3.29	0.00358569	0.816
Q70J99;K7EQ37;K7EN81;K7EN29;K7EIH3;K7EMK8	Q70J99	Protein unc-13 homolog D	UNC13D	3.25	0.00359802	0.816
Q14728;D6RE79;D6RIZ4;D6RA47;D6R9N3	Q14728;D6RE79;D6RIZ4	Major facilitator superfamily domain-containing protein 10	MFSD10	4	0.00361586	0.816
Q13637	Q13637	Ras-related protein Rab-32	RAB32	1.76	0.00361612	0.816
O60869	O60869	Endothelial differentiation-related factor 1	EDF1	1.71	0.00365796	0.817
P30260;G5EA36;I3L394;F6QPS0;I3L328;I3L225	P30260;G5EA36	Cell division cycle protein 27 homolog	CDC27	2.74	0.00366242	0.817
A8K727;A0A087WZ32;Q9HB19;A0A087X038;E5RHB5;E5RGP3	A8K727;A0A087WZ32;Q9HB19;A0A087X038	Pleckstrin homology domain-containing family A member 2	PLEKHA2	2.38	0.00368517	0.817
Q8IXJ6;A0A0A0MRF5;E7EWX6;B5MCS1;C9JZQ0;F8WCF4;C9JR33;C9J3U7;F8WF57;F8WDM4;F8WBT6	Q8IXJ6;A0A0A0MRF5;E7EWX6;B5MCS1	NAD-dependent protein deacetylase sirtuin-2	SIRT2	1.73	0.00369231	0.817
A0A2R8YDB8;H7BXF5;Q9H0E3	A0A2R8YDB8;H7BXF5;Q9H0E3	Histone deacetylase complex subunit SAP130	SAP130	2.93	0.0037171	0.817
Q7Z406	Q7Z406	Myosin-14	MYH14	1.58	0.00372866	0.818
Q9UFC0;H7C5S6;H7C5N7	Q9UFC0	Leucine-rich repeat and WD repeat-containing protein 1	LRWD1	2.27	0.00373021	0.818
Q8IVL6	Q8IVL6	Prolyl 3-hydroxylase 3	LEPREL2	3.9	0.00373661	0.818
Q9BRQ8	Q9BRQ8	Apoptosis-inducing factor 2	AIFM2	2.16	0.00373716	0.818
P52566;F5H3P3;F5H6Q0;F5H2R5	P52566;F5H3P3;F5H6Q0;F5H2R5	Rho GDP-dissociation inhibitor 2	ARHGDIB	1.83	0.00379195	0.818
Q14690;A0A3B3IUD7;S4R3Q4	Q14690;A0A3B3IUD7	Protein RRP5 homolog	PDCD11	1.47	0.00379851	0.818
Q9H7D0;H0Y7N4;H0YB14	Q9H7D0	Dedicator of cytokinesis protein 5	DOCK5	3.05	0.00380124	0.818
Q9H857;H7C519;H7C4G8;C9J036	Q9H857;H7C519	5-nucleotidase domain-containing protein 2	NT5DC2	2.73	0.00382478	0.819
O95619;F8W0J4;F8W1B9;F8VTR4	O95619;F8W0J4	YEATS domain-containing protein 4	YEATS4	2.67	0.00384373	0.819
Q86VS8;H0YDM4;H0YE69	Q86VS8	Protein Hook homolog 3	HOOK3	1.44	0.00385317	0.819
P33176	P33176	Kinesin-1 heavy chain	KIF5B	1.33	0.00385552	0.819
Q15833;M0R0M7;M0R1A1;R4GMY7;M0R118;M0R0D4;M0R376	Q15833;M0R0M7	Syntaxin-binding protein 2	STXBP2	1.71	0.00388353	0.819
Q9UPY3;A0A7I2YBM0;H0YJZ6;A0A6Q8PHG6;A0A6Q8PFV4;A0A6Q8PH99;Q5D0K5;F6SZ09	Q9UPY3;A0A7I2YBM0;H0YJZ6	Endoribonuclease Dicer	DICER1	2.16	0.00390103	0.819
O00469;C9JXZ0;F8WEW3	O00469	Procollagen-lysine,2-oxoglutarate 5-dioxygenase 2	PLOD2	2.14	0.00390125	0.819
P14384;F8W111;F8VVI6;H0YHN7;H0YHG6;F8VR29;F8VU13	P14384;F8W111	Carboxypeptidase M	CPM	2.3	0.00390634	0.82
Q8WUP2;E7EWE8;D6RAI6;E7EPI5;E7EN81;D6R9I4;D6RA19;D6R9V9	Q8WUP2;E7EWE8	Filamin-binding LIM protein 1	FBLIM1	1.8	0.00395053	0.82
O95302;C9J4P8;Q75LS8	O95302	Peptidyl-prolyl cis-trans isomerase FKBP9	FKBP9	2.3	0.00395327	0.82
Q8NDT2	Q8NDT2	Putative RNA-binding protein 15B	RBM15B	2.62	0.0039584	0.82
E9PJD7;Q6ZMK1;E9PQ42	E9PJD7;Q6ZMK1	Cysteine and histidine-rich protein 1	CYHR1	2.29	0.00395968	0.82
Q5SR54;O94985	Q5SR54;O94985	Calsyntenin-1;Soluble Alc-alpha;CTF1-alpha	CLSTN1	2.49	0.00396891	0.82
Q9H2L5;R4GNA4;V9GYK1;Q5T737;Q5T739	Q9H2L5	Ras association domain-containing protein 4	RASSF4	2.31	0.00396979	0.82
Q8WXF1;X6RDA4	Q8WXF1;X6RDA4	Paraspeckle component 1	PSPC1	1.87	0.00400015	0.821
Q16647	Q16647	Prostacyclin synthase	PTGIS	3.31	0.00400467	0.821
P50749	P50749	Ras association domain-containing protein 2	RASSF2	2.81	0.004008	0.821
Q8TEM1	Q8TEM1	Nuclear pore membrane glycoprotein 210	NUP210	2.07	0.00401617	0.821
M0QZR4;Q92888;M0QYC1;M0R2C7;M0QYS3;M0QZH8;M0QXV6	M0QZR4;Q92888;M0QYC1	Rho guanine nucleotide exchange factor 1	ARHGEF1	1.59	0.00405151	0.821
Q96AA3;B5MDE0;C9JP01	Q96AA3;B5MDE0;C9JP01	Protein RFT1 homolog	RFT1	2.74	0.00408848	0.821
Q9Y296;E9PQE8;E9PN70;E9PKS9;J3KP27;G3V1A0;G5EA23	Q9Y296;E9PQE8;E9PN70;E9PKS9;J3KP27;G3V1A0;G5EA23	Trafficking protein particle complex subunit 4	TRAPPC4	4.14	0.00412727	0.822
O60684;Q5TFJ7;S4R3E5	O60684	Importin subunit alpha-7	KPNA6	1.89	0.00414893	0.822
O00139;A0A6Q8PGH7;A0A6Q8PG37;A0A6Q8PGG1;D6R9M0	O00139;A0A6Q8PGH7;A0A6Q8PG37;A0A6Q8PGG1;D6R9M0	Kinesin-like protein KIF2A	KIF2A	1.56	0.00415669	0.822
P09619;E5RJ14;E5RH16;E5RII0	P09619	Platelet-derived growth factor receptor beta	PDGFRB	3.7	0.00416192	0.822
Q9UIA0;B1AHH4;B1AHH5;B1AHH6;H0Y724	Q9UIA0;B1AHH4;B1AHH5;B1AHH6	Cytohesin-4	CYTH4	4.45	0.00418114	0.822
P04264;CON__P04264	P04264;CON__P04264	Keratin, type II cytoskeletal 1	KRT1	1.78	0.0042172	0.823
Q13636;J3QR51	Q13636	Ras-related protein Rab-31	RAB31	3.33	0.00429232	0.824
sp|A008494|abysis_8494;sp|A085137|abysis_85137;sp|A063921|abysis_63921;sp|A052863|abysis_52863;sp|A084298|abysis_84298;sp|A085733|abysis_85733;sp|A080853|abysis_80853;sp|A036795|abysis_36795;sp|A082344|abysis_82344;sp|A080078|abysis_80078;sp|A083047|abysis_83047;sp|A062648|abysis_62648;sp|A052886|abysis_52886;sp|A030643|abysis_30643;sp|A086710|abysis_86710;sp|A020401|abysis_20401;sp|A006934|abysi…	sp|A008494|abysis_8494			4.37	0.00432044	0.824
Q53F23;P24557;A0A0C4DH47;A0A0A0MSK3;C9JS68;A0A498U6I9;F8WD37;F8WC80	Q53F23;P24557;A0A0C4DH47;A0A0A0MSK3	Thromboxane-A synthase	TBXAS1	2.37	0.00434489	0.824
Q75QN2;J3KNV5;E5RIN8;E5RG48;E5RJF0;H0YBQ1;E5RH10	Q75QN2;J3KNV5	Integrator complex subunit 8	INTS8	2.36	0.00437006	0.824
J3KQV8;O43426;A0A0D9SGJ6;C9JFZ1;J3KPK1;C9JW66;C9J1Z6;H7BZ56;H7BZC2	J3KQV8;O43426;A0A0D9SGJ6;C9JFZ1;J3KPK1	Synaptojanin-1	SYNJ1	2.32	0.004415	0.825
F8WCF6;P59998;F8WDD7;H7C0A3;A0A0A6YYG9;F8WE39;F8WDW3	F8WCF6;P59998;F8WDD7;H7C0A3;A0A0A6YYG9	Actin-related protein 2/3 complex subunit 4	ARPC4-TTLL3;ARPC4	1.75	0.00443234	0.825
A0A1B0GTY3;O95450	A0A1B0GTY3;O95450	A disintegrin and metalloproteinase with thrombospondin motifs 2	ADAMTS2	2.73	0.00445063	0.825
Q9Y4R8;H3BRS3;H3BU45	Q9Y4R8;H3BRS3	Telomere length regulation protein TEL2 homolog	TELO2	2.39	0.00447894	0.825
Q8WYJ6;J3KNL2;I3L2M1	Q8WYJ6;J3KNL2	Septin-1	37135	2.86	0.00449774	0.825
A0A7P0TAX8;A0A7P0T8H0;A0A7P0T8B5;Q8IY34;F5GZ36;F5H1C8;A0A7P0Z4G8;F5H251;H0YFC1;H0YG40	A0A7P0TAX8;A0A7P0T8H0;A0A7P0T8B5;Q8IY34;F5GZ36;F5H1C8;A0A7P0Z4G8;F5H251	Solute carrier family 15 member 3	SLC15A3	3.43	0.00453826	0.826
P69892;E9PBW4	P69892;E9PBW4	Hemoglobin subunit gamma-2	HBG2	5.28	0.00455209	0.826
Q96GM5;F8VRQ4;F8VZ70;F8VUB0;H0YHV1;F8VW95;C9JYI7	Q96GM5;F8VRQ4	SWI/SNF-related matrix-associated actin-dependent regulator of chromatin subfamily D member 1	SMARCD1	2.47	0.00456986	0.826
O00602	O00602	Ficolin-1	FCN1	2.79	0.00460037	0.826
Q5VZZ6;A0A0J9YX66;A0A1B0GU44;E9PC62;A0A1B0GUN8;A0A0J9YXJ0;O95319;V9GYD9;V9GY47;A0A0J9YXK1	Q5VZZ6;A0A0J9YX66;A0A1B0GU44;E9PC62;A0A1B0GUN8;A0A0J9YXJ0;O95319;V9GYD9	CUGBP Elav-like family member 2	CELF2	2.23	0.00463311	0.827
Q4LDE5	Q4LDE5	Sushi, von Willebrand factor type A, EGF and pentraxin domain-containing protein 1	SVEP1	2.55	0.00465882	0.827
P51159;H3BN55;H3BS49;H3BVH7;H3BUD9;H3BU81	P51159;H3BN55;H3BS49;H3BVH7;H3BUD9	Ras-related protein Rab-27A	RAB27A	2.15	0.00472715	0.827
Q9P2P5;A0A2R8Y6F3;A0A2R8YE75	Q9P2P5;A0A2R8Y6F3;A0A2R8YE75	E3 ubiquitin-protein ligase HECW2	HECW2	2.16	0.00473767	0.828
O75909;G3V5E1;G3V2Q3;G3V235	O75909;G3V5E1;G3V2Q3	Cyclin-K	CCNK	1.82	0.00473873	0.828
E9PC47;P53667	E9PC47;P53667	LIM domain kinase 1	LIMK1	2.33	0.00475458	0.828
Q96RQ1;F8VPA6;F8W0R1;F8VR88;F8VUZ2;H0YI50;H0YI58;H0YHJ8;F8VRW9	Q96RQ1;F8VPA6;F8W0R1;F8VR88;F8VUZ2	Endoplasmic reticulum-Golgi intermediate compartment protein 2	ERGIC2	3.35	0.00476427	0.828
P49840;A8MT37;M0QYV0;A0A7I2V4Q6;A0A7I2V2P0;A0A7I2YQG6;A0A7I2V2J2;A0A7I2V485;A0A7I2YQJ1;A0A7I2V4Z1;A0A7I2YQM8;A0A7I2V2N4;A0A7I2YQA1;A0A7I2YQ81;A0A7I2V5Q2;A0A7I2V589;A0A7I2V511;A0A7I2YQV9;A0A7I2V2P8;A0A7I2V2P9;A0A7I2V3W5;A0A7I2V379;A0A7I2V5B3;A0A7I2V553;A0A7I2V5M2;A0A7I2V2H8;A0A7I2V627;A0A7I2V442;A0A7I2V626;A0A7I2V3M8;A0A7I2V4G2;A0A7I2V3H9;A0A7I2V341;A0A7I2YQ76;A0A7I2V345;A0A7I2YQK2;A0A7I2V5S8;A0A7…	P49840;A8MT37	Glycogen synthase kinase-3 alpha	GSK3A	1.37	0.00476519	0.828
Q92466;A0A087X0X5;A0A087WYT8;A0A087WW71;A0A087WTQ7;A0A087WV56	Q92466	DNA damage-binding protein 2	DDB2	3.07	0.00479696	0.828
J3KPD6;P08631	J3KPD6;P08631	Non-specific protein-tyrosine kinase;Tyrosine-protein kinase HCK	HCK	2.14	0.00482043	0.828
O75626;A0A3B3IU23	O75626;A0A3B3IU23	PR domain zinc finger protein 1	PRDM1	2.56	0.00483082	0.828
O43252	O43252	Bifunctional 3-phosphoadenosine 5-phosphosulfate synthase 1;Sulfate adenylyltransferase;Adenylyl-sulfate kinase	PAPSS1	2.44	0.00484224	0.828
B1AP13;B1AP15;H3BLV0;P08174	B1AP13;B1AP15;H3BLV0;P08174	Complement decay-accelerating factor	CD55	2.95	0.00485241	0.829
Q9NWT1	Q9NWT1	p21-activated protein kinase-interacting protein 1	PAK1IP1	3.32	0.00488101	0.829
F5H5U2;Q8NHQ9	F5H5U2;Q8NHQ9	ATP-dependent RNA helicase DDX55	DDX55	2.72	0.00488122	0.829
Q9H1A3	Q9H1A3	Methyltransferase-like protein 9	METTL9	3.13	0.00488318	0.829
P16452;F5H563;H3BUR1;H3BPV8	P16452;F5H563	Erythrocyte membrane protein band 4.2	EPB42	2.34	0.00493534	0.829
A2ACR1;A2ACR0	A2ACR1;A2ACR0	Proteasome subunit beta type	PSMB9	2.42	0.00493653	0.829
sp|A032208|abysis_32208	sp|A032208|abysis_32208			5.6	0.00500535	0.83
Q15024	Q15024	Exosome complex component RRP42	EXOSC7	2.34	0.00509474	0.83
Q9Y490	Q9Y490	Talin-1	TLN1	1.19	0.00513652	0.831
Q9P2A4;I3L1X2;I3L3W4	Q9P2A4	ABI gene family member 3	ABI3	1.86	0.00514083	0.831
CON__P04259	CON__P04259			2.84	0.00514333	0.831
Q9HBI1;A0A087WZB5;B0QYP8	Q9HBI1;A0A087WZB5	Beta-parvin	PARVB	2.49	0.00516984	0.831
Q96P48;E7EU13;A0A0A0MSJ2;F8WBT0;F5GWN4;F5GWQ2;H0YGD1;Q96BY2;Q96PV4	Q96P48;E7EU13;A0A0A0MSJ2	Arf-GAP with Rho-GAP domain, ANK repeat and PH domain-containing protein 1	ARAP1	1.56	0.0052156	0.831
Q9BXD5;A0A087WZ70	Q9BXD5;A0A087WZ70	N-acetylneuraminate lyase	NPL	1.79	0.00522283	0.831
P51688;I3NI22;I3L3T3;I3L2I6;I3L4B7;I3L2L4	P51688	N-sulphoglucosamine sulphohydrolase	SGSH	3.84	0.0052385	0.832
P29317	P29317	Ephrin type-A receptor 2	EPHA2	1.8	0.00527348	0.832
Q04917;A2IDB2;F8WEB6;A2IDB1	Q04917;A2IDB2	14-3-3 protein eta	YWHAH	1.24	0.00530847	0.832
P60510;H3BTA2;H3BV22;I3L4X0;H3BPN5;H3BVE3	P60510;H3BTA2;H3BV22	Serine/threonine-protein phosphatase 4 catalytic subunit;Serine/threonine-protein phosphatase	PPP4C	1.86	0.00531443	0.832
A0A7P0T8Y0;Q8IY21;A0A7P0TAZ7;H0Y8Z7;A0A7P0T9W8;H0Y9B2	A0A7P0T8Y0;Q8IY21;A0A7P0TAZ7	Probable ATP-dependent RNA helicase DDX60	DDX60	1.7	0.00537093	0.833
Q02809;Q5JXB7;Q5JXB8	Q02809	Procollagen-lysine,2-oxoglutarate 5-dioxygenase 1	PLOD1	1.97	0.00538024	0.833
P05186;B1ANL0	P05186	Alkaline phosphatase, tissue-nonspecific isozyme	ALPL	2.69	0.00539838	0.833
Q99470	Q99470	Stromal cell-derived factor 2	SDF2	3.55	0.00541466	0.833
Q92556;H7C0N5;C9JIW2;C9IZR8;C9J5X3;C9JB20	Q92556	Engulfment and cell motility protein 1	ELMO1	2.55	0.0054172	0.833
Q8N386	Q8N386	Leucine-rich repeat-containing protein 25	LRRC25	2.8	0.00546621	0.833
P24723;H0YJX3;G3V4L3;G3V520;G3V4Q6	P24723	Protein kinase C eta type	PRKCH	2.56	0.00549808	0.833
D6RGG3;Q99715;H0Y4P7;H0Y5N9;H0Y991	D6RGG3;Q99715	Collagen alpha-1(XII) chain	COL12A1	3.03	0.00550566	0.834
P29350;F5H0N8;F5H5H9;F5GY79;F5H1Z8;F5H1V7;F5H4Z1;F5GXD4;U3KQS1	P29350	Tyrosine-protein phosphatase non-receptor type 6	PTPN6	1.58	0.00553321	0.834
P50281	P50281	Matrix metalloproteinase-14	MMP14	3.03	0.00555105	0.834
Q5VYY1	Q5VYY1	Ankyrin repeat domain-containing protein 22	ANKRD22	4.16	0.00556381	0.834
O60268;H3BNA7	O60268;H3BNA7	Uncharacterized protein KIAA0513	KIAA0513	2.91	0.00558403	0.834
Q6V1X1;J3KPT0;H0YK36;H0YKA2;H3BNM2;H0YN53;H3BQ40;H0YMV1	Q6V1X1;J3KPT0	Dipeptidyl peptidase 8	DPP8	1.93	0.00558482	0.834
Q9NR12;D6RH06;D6RF83;H7BYK4;D6RAN1;H0Y8W6	Q9NR12;D6RH06	PDZ and LIM domain protein 7	PDLIM7	1.52	0.00561886	0.834
Q15582;H0Y8L3;S4R3C6;H0Y9D7;H0Y8M8;H0YAH8;H0YAB8;D6RBX4	Q15582;H0Y8L3	Transforming growth factor-beta-induced protein ig-h3	TGFBI	1.41	0.0056284	0.834
Q96T58;A0A669KB49;H0Y5U7;F6WRY4	Q96T58	Msx2-interacting protein	SPEN	3.57	0.00568764	0.835
P16885;H3BQV5;H3BPZ3	P16885	1-phosphatidylinositol 4,5-bisphosphate phosphodiesterase gamma-2	PLCG2	2.12	0.00568798	0.835
P24158	P24158	Myeloblastin	PRTN3	4.02	0.00570509	0.835
sp|A008487|abysis_8487;sp|A008301|abysis_8301;sp|A064972|abysis_64972;sp|A056311|abysis_56311;sp|A046555|abysis_46555;sp|A068917|abysis_68917;sp|A060277|abysis_60277;sp|A035846|abysis_35846;sp|A059739|abysis_59739;sp|A046568|abysis_46568;sp|A084948|abysis_84948;sp|A059629|abysis_59629;sp|A060383|abysis_60383;sp|A007394|abysis_7394;sp|A005382|abysis_5382;sp|A023635|abysis_23635;sp|A064960|abysis_6…	sp|A008487|abysis_8487			3.87	0.00570931	0.835
Q8TEQ6	Q8TEQ6	Gem-associated protein 5	GEMIN5	1.6	0.00572818	0.835
Q9Y5S1;H7BZK2;K7EPY7;K7EKG5	Q9Y5S1;H7BZK2	Transient receptor potential cation channel subfamily V member 2	TRPV2	2.68	0.00573164	0.835
P12109;A0A087X0S5;A0A804HJ28	P12109	Collagen alpha-1(VI) chain	COL6A1	2.1	0.00580899	0.836
P13611;E9PF17;D6RGZ6;Q86W61	P13611;E9PF17;D6RGZ6	Versican core protein	VCAN	3.8	0.0058712	0.836
Q709C8;A0A3B3IU50;A0A3B3IT88	Q709C8	Vacuolar protein sorting-associated protein 13C	VPS13C	1.43	0.00588086	0.836
Q9Y2L9;C9JWE0;C9J5B8	Q9Y2L9	Leucine-rich repeat and calponin homology domain-containing protein 1	LRCH1	1.91	0.00590616	0.836
sp|A052465|abysis_52465;sp|A004354|abysis_4354;sp|A002680|abysis_2680;sp|A019498|abysis_19498;sp|A014415|abysis_14415	sp|A052465|abysis_52465			4.4	0.00594297	0.836
Q15388	Q15388	Mitochondrial import receptor subunit TOM20 homolog	TOMM20	4.07	0.00595363	0.837
Q9UL03;B3KQH5;G5E9X1;C9J885;C9K0V7;F8WAV7;C9JVX2;C9JXP6;C9JAV7	Q9UL03;B3KQH5;G5E9X1	Integrator complex subunit 6	INTS6	1.84	0.00595672	0.837
A0A8I5KXV0;A0A8I5KWA8;Q04656;A0A8I5QKR3;A0A8I5KST1;A0A8I5KQ62;A0A8I5KPN6;A0A8I5KVT9;A0A8I5KY05;A0A8I5QJP0;A0A8I5KU46;A0A8I5KR00;A0A8I5KWH1;A0A8I5KVB6	A0A8I5KXV0;A0A8I5KWA8;Q04656;A0A8I5QKR3;A0A8I5KST1;A0A8I5KQ62	Copper-transporting ATPase 1	ATP7A	1.99	0.0059635	0.837
P61160;A0A1B0GWD0;A0A1B0GWH0	P61160	Actin-related protein 2	ACTR2	1.39	0.00597133	0.837
O60331;A0A7P0T808;A0A7P0TAE7	O60331;A0A7P0T808	Phosphatidylinositol 4-phosphate 5-kinase type-1 gamma	PIP5K1C	2.98	0.00602385	0.837
A0A5F9ZHU7;P49643;A0A5F9ZHR0;A0A096LP51	A0A5F9ZHU7;P49643	DNA primase large subunit	PRIM2	2.49	0.00602791	0.837
Q86YV9	Q86YV9	Hermansky-Pudlak syndrome 6 protein	HPS6	2.27	0.00603194	0.837
Q93084	Q93084	Sarcoplasmic/endoplasmic reticulum calcium ATPase 3	ATP2A3	4.15	0.00610943	0.837
Q8N1F7;H3BVG0;H3BM93;H3BRI8;H3BV11;H3BNN5;H3BPA9;H3BVE2;H3BP95;H3BMX0;H3BRD9;H3BV15;H3BNG7	Q8N1F7;H3BVG0	Nuclear pore complex protein Nup93	NUP93	1.33	0.00612272	0.838
Q96CW5;A0A3B3ITE3;A0A087WU06;A0A0J9YX63;A0A0J9YX56;A0A087WZV5	Q96CW5;A0A3B3ITE3	Gamma-tubulin complex component 3	TUBGCP3	2.54	0.00616557	0.838
E7ETE2;P12081;A0A6Q8PHA5;A0A6Q8PF47;B4DDD8;A0A6Q8PFF2;A0A6Q8PHE3;A0A6Q8PF07;B4E1C5;A0A6Q8PFG9;A0A6Q8PFN6;A0A6Q8PHQ0;D6RF05;A0A2R8YCI2;A0A2R8YFR1;P11487	E7ETE2;P12081;A0A6Q8PHA5;A0A6Q8PF47;B4DDD8;A0A6Q8PFF2;A0A6Q8PHE3;A0A6Q8PF07;B4E1C5	Histidine--tRNA ligase, cytoplasmic	HARS	1.12	0.00616641	0.838
P08648;H0YIV7	P08648	Integrin alpha-5;Integrin alpha-5 heavy chain;Integrin alpha-5 light chain	ITGA5	1.49	0.00633422	0.839
Q9UKY1	Q9UKY1	Zinc fingers and homeoboxes protein 1	ZHX1	2.21	0.00644078	0.839
O94915;F2Z2S2;A0A6E1XQM6;A0A286YEZ9;A0A2C9F2R7;H0Y9X0;A0A669KB90;D6R9B9	O94915;F2Z2S2;A0A6E1XQM6	Protein furry homolog-like	FRYL	3.04	0.00650373	0.84
Q9NRN9;B8ZZY8;B8ZZE3;B8ZZC8;E7EMN2;H7C0M7;F5H4E8	Q9NRN9;B8ZZY8;B8ZZE3;B8ZZC8;E7EMN2;H7C0M7	Methyltransferase-like protein 5	METTL5	2.44	0.00650455	0.84
sp|A012586|abysis_12586;sp|A085306|abysis_85306;sp|A024077|abysis_24077;sp|A084991|abysis_84991	sp|A012586|abysis_12586			5.98	0.0065181	0.84
Q9Y279;A0A494C0F5;H7C062	Q9Y279;A0A494C0F5;H7C062	V-set and immunoglobulin domain-containing protein 4	VSIG4	1.94	0.00653995	0.84
sp|A036139|abysis_36139;sp|A087008|abysis_87008;sp|A006153|abysis_6153;sp|A079047|abysis_79047;sp|A006132|abysis_6132;sp|A006028|abysis_6028;sp|A061335|abysis_61335;sp|A085843|abysis_85843;sp|A082798|abysis_82798;sp|A004691|abysis_4691;sp|A004689|abysis_4689;sp|A001482|abysis_1482;sp|A047945|abysis_47945;sp|A008816|abysis_8816;sp|A066312|abysis_66312;sp|A020961|abysis_20961;sp|A006122|abysis_6122…	sp|A036139|abysis_36139;sp|A087008|abysis_87008;sp|A006153|abysis_6153;sp|A079047|abysis_79047;sp|A006132|abysis_6132;sp|A006028|abysis_6028;sp|A061335|abysis_61335;sp|A085843|abysis_85843			4.68	0.00654658	0.84
sp|A084657|abysis_84657;sp|A012748|abysis_12748;sp|A008037|abysis_8037;sp|A009546|abysis_9546;sp|A081261|abysis_81261;sp|A008511|abysis_8511;sp|A081435|abysis_81435;sp|A009545|abysis_9545;sp|A052454|abysis_52454	sp|A084657|abysis_84657;sp|A012748|abysis_12748;sp|A008037|abysis_8037;sp|A009546|abysis_9546;sp|A081261|abysis_81261;sp|A008511|abysis_8511;sp|A081435|abysis_81435;sp|A009545|abysis_9545			1.37	0.00655838	0.84
P09884;A6NMQ1;A0A7I2V2V3	P09884;A6NMQ1	DNA polymerase alpha catalytic subunit;DNA polymerase	POLA1	3.46	0.00657188	0.84
O43760;K7ELD9;K7ENG9;K7ELS8;K7EJ35	O43760;K7ELD9;K7ENG9;K7ELS8	Synaptogyrin-2	SYNGR2	5.93	0.00661022	0.84
P46063;F8WA66;F8WD97;F5H2L2;F5H4P4;F5H3W0;F5GYB7	P46063	ATP-dependent DNA helicase Q1	RECQL	1.43	0.00665821	0.841
P02751	P02751	Fibronectin;Anastellin;Ugl-Y1;Ugl-Y2;Ugl-Y3	FN1	1.39	0.00666485	0.841
O14786;E9PEP6;Q5JWQ6;E7EX60;Q5T7F0;Q5JWQ4;H0Y4A0;V9GYL7;Q5JWQ2	O14786;E9PEP6;Q5JWQ6;E7EX60;Q5T7F0;Q5JWQ4	Neuropilin-1	NRP1	1.84	0.0066754	0.841
A0A2R8YE63;Q12929;A0A2R8Y4W2;F5H0R8;F5H3Q6;F5GYM8;H0YFG1;F5H1B5;F5H2B8	A0A2R8YE63;Q12929;A0A2R8Y4W2	Epidermal growth factor receptor kinase substrate 8	EPS8	1.55	0.00667628	0.841
Q99707;A0A7P0T9G7;A0A7P0TAJ0;A0A7P0TAV2;A0A6Q8PGK3;B1ANE3;A0A494C064;A0A494C1A2;A0A7P0TA06;A0A7P0T956	Q99707;A0A7P0T9G7;A0A7P0TAJ0;A0A7P0TAV2;A0A6Q8PGK3;B1ANE3	Methionine synthase	MTR	1.27	0.00668553	0.841
Q86VV8;A0A7I2V670;A0A1W2PR96;J3KSV7;J3KTD2;A0A7I2V5W4;A0A1W2PR32;A0A1W2PQI7;A0A1W2PPP3	Q86VV8;A0A7I2V670	Rotatin	RTTN	3.16	0.00670811	0.841
O75843;G3V532;H0YJ08;H0YJ47;G3V3Z2;G3V2V9	O75843	AP-1 complex subunit gamma-like 2	AP1G2	3.08	0.00674316	0.841
O60234;M0R0C1;M0QYJ8;M0QXC2;M0QX47;M0QXZ6;M0R2P2	O60234;M0R0C1;M0QYJ8	Glia maturation factor gamma	GMFG	1.69	0.0067623	0.841
Q8NBL1;F8WEW4;B4DVA9;H7C5H0;F8WDC4	Q8NBL1	Protein O-glucosyltransferase 1	POGLUT1	2.02	0.00687565	0.842
Q9GZV7;Q5T3J1	Q9GZV7;Q5T3J1	Hyaluronan and proteoglycan link protein 2	HAPLN2	2.59	0.00690373	0.842
G5E9C5;O76074;C9JGT3;H0YA14	G5E9C5;O76074;C9JGT3	cGMP-specific 3,5-cyclic phosphodiesterase	PDE5A	2.51	0.00693818	0.842
Q9UKV8;E5RJY2	Q9UKV8	Protein argonaute-2	AGO2	1.12	0.00698234	0.842
P62993;J3KT38;J3QRL5;J3QLF6	P62993;J3KT38;J3QRL5	Growth factor receptor-bound protein 2	GRB2	1.48	0.00701928	0.843
Q3KQV9;A0A087X226	Q3KQV9	UDP-N-acetylhexosamine pyrophosphorylase-like protein 1	UAP1L1	2.07	0.00709147	0.843
Q5VST6	Q5VST6	Alpha/beta hydrolase domain-containing protein 17B	ABHD17B	3.06	0.00715631	0.843
P08253;H3BS34;H3BV48;H3BR66	P08253;H3BS34	72 kDa type IV collagenase;PEX	MMP2	3.63	0.00717059	0.843
O75143;J9JIF6;H0YEM7;E9PPR2;A0A1B0GXJ3;J3KST9;J3QR83;J3QRL1;J3KRU6;H0YCL5	O75143;J9JIF6	Autophagy-related protein 13	ATG13	1.65	0.00721375	0.844
P07737;K7EJ44	P07737;K7EJ44	Profilin-1	PFN1	1.5	0.00725799	0.844
P00488;Q9NQP5;A6PVK5;H0Y796;H0Y4W5	P00488	Coagulation factor XIII A chain	F13A1	2.25	0.00730308	0.844
C9JYQ9;H0Y8C2;Q6P5R6	C9JYQ9;H0Y8C2;Q6P5R6	60S ribosomal protein L22-like 1	RPL22L1	3.89	0.00731704	0.844
Q14315	Q14315	Filamin-C	FLNC	2.91	0.0073293	0.844
P59768;G3V3J9;G3V2N0;G3V2C9;G3V415	P59768;G3V3J9;G3V2N0;G3V2C9;G3V415	Guanine nucleotide-binding protein G(I)/G(S)/G(O) subunit gamma-2;Guanine nucleotide-binding protein subunit gamma	GNG2	3.44	0.00736266	0.844
Q96SB3	Q96SB3	Neurabin-2	PPP1R9B	1.68	0.00746105	0.845
Q8TB03	Q8TB03	Uncharacterized protein CXorf38	CXorf38	3.51	0.00746427	0.845
P29466;G3V169;H0YEC7;B4DVD8;A0A1W2PRX7;Q5FBZ0	P29466;G3V169;H0YEC7;B4DVD8	Caspase-1;Caspase-1 subunit p20;Caspase-1 subunit p10;Caspase	CASP1	1.84	0.00749328	0.845
Q8ND04;J3KTD7;J3QKP6;J3QRE1	Q8ND04;J3KTD7	Protein SMG8	SMG8	1.9	0.00753929	0.845
Q02383	Q02383	Semenogelin-2	SEMG2	1.88	0.00758495	0.845
Q9GZS1;E7EX70	Q9GZS1	DNA-directed RNA polymerase I subunit RPA49	POLR1E	3.77	0.00759413	0.845
Q9UKX5	Q9UKX5	Integrin alpha-11	ITGA11	2.85	0.00761322	0.846
Q6UX71	Q6UX71	Plexin domain-containing protein 2	PLXDC2	2.39	0.00763108	0.846
P62942;F6T7Q3;Q1JUQ5;A0A7I2V3S6;A0A087WZM5;Q5VVH2;Q1JUQ3;Q5W0X3;A0A087WTS4;A0A087WV48	P62942;F6T7Q3;Q1JUQ5;A0A7I2V3S6	Peptidyl-prolyl cis-trans isomerase FKBP1A;Peptidyl-prolyl cis-trans isomerase	FKBP1A;FKBP12-Exip2	2.01	0.00763656	0.846
Q9Y3Z3;A0A2R8YCS7;A0A2R8YD90;A0A2R8YF51;A0A2R8Y5D2;A0A804HL67;A0A2R8Y586;A0A2R8YFV6;A0A2R8Y7R5;A0A2R8Y755;A0A2R8YG48;A0A2R8YF18;A0A2R8YDI8	Q9Y3Z3;A0A2R8YCS7;A0A2R8YD90	Deoxynucleoside triphosphate triphosphohydrolase SAMHD1	SAMHD1	1.18	0.00776443	0.846
Q7L2H7;J3KNJ2;H0YCQ8;E9PN86;E7ESM3;E9PRY0;E9PRI2	Q7L2H7;J3KNJ2	Eukaryotic translation initiation factor 3 subunit M	EIF3M	1.64	0.00779617	0.846
Q5T1M5;A0A8I5KX71;A0A8I5QJ94;A0A8I5QJL3;A0A8I5KQM8;A0A8I5KRZ8;A0A8I5KV70;A0A8I5KXA6;A0A8I5KRH4;A0A8I5KXH0	Q5T1M5;A0A8I5KX71;A0A8I5QJ94;A0A8I5QJL3	FK506-binding protein 15	FKBP15	1.23	0.00780152	0.846
Q93063;A0A804HKG2;A0A804HJW9;A0A804HLF7;A0A804HL74;A0A804HHX4	Q93063;A0A804HKG2;A0A804HJW9;A0A804HLF7;A0A804HL74	Exostosin-2	EXT2	2.26	0.00780937	0.846
F5GYQ1;P61421;J3QL14;H3BQJ1;H3BQB4;H3BSG7	F5GYQ1;P61421;J3QL14	V-type proton ATPase subunit d 1	ATP6V0D1	1.23	0.00788678	0.847
Q96DH6;B4DHE8;A0A6Q8PF05;J3QKT5;J3KTC1;A0A6Q8PHT3;A0A6Q8PFU8;A0A6Q8PGD8;A0A6Q8PHP1;H0YHB7	Q96DH6;B4DHE8;A0A6Q8PF05	RNA-binding protein Musashi homolog 2	MSI2	3.39	0.00797178	0.847
Q12899;A2AE48;A0A0G2JIW2;Q5SPU2;A2AE50;REV__sp|A035640|abysis_35640;REV__sp|A062964|abysis_62964;REV__sp|A031178|abysis_31178;REV__sp|A038676|abysis_38676;REV__sp|A077200|abysis_77200;REV__sp|A022960|abysis_22960;REV__sp|A030818|abysis_30818	Q12899;A2AE48	Tripartite motif-containing protein 26	TRIM26	2.98	0.00799024	0.847
P54750	P54750	Calcium/calmodulin-dependent 3,5-cyclic nucleotide phosphodiesterase 1A	PDE1A	2.59	0.00799267	0.847
Q02040;X6RAJ1	Q02040;X6RAJ1	A-kinase anchor protein 17A	AKAP17A	2.84	0.00799659	0.847
Q16270	Q16270	Insulin-like growth factor-binding protein 7	IGFBP7	2.51	0.00802524	0.847
P30566;A0A7P0Z472;A0A7P0T9A7;A0A1B0GTJ7;A0A1B0GWJ0;A0A096LNY6;A0A0A6YY92;A0A7P0T8E4;A0A1B0GTG9;A0A1B0GWF8;A0A096LNY5;A0A096LP92;A0A096LNY4;A0A096LPA2;A0A096LP72;B4DEP1;A0A1W2PRX2;A0A096LP76;V9GY96;A0A096LNT0	P30566;A0A7P0Z472;A0A7P0T9A7;A0A1B0GTJ7;A0A1B0GWJ0;A0A096LNY6;A0A0A6YY92;A0A7P0T8E4;A0A1B0GTG9;A0A1B0GWF8;A0A096LNY5;A0A096LP92	Adenylosuccinate lyase	ADSL	1.15	0.00813876	0.848
A0A0J9YX62;O75190;C9J2C4;E9PH18;C9JDR7;C9JDX6;F8WCZ4;C9J2P2;C9JB42;C9JN01;Q8WWF6;Q8NHS0	A0A0J9YX62;O75190;C9J2C4;E9PH18;C9JDR7;C9JDX6;F8WCZ4;C9J2P2;C9JB42	DnaJ homolog subfamily B member 6	DNAJB6	2.59	0.00816045	0.848
P16298;Q5F2F8;Q5F2G0	P16298;Q5F2F8	Serine/threonine-protein phosphatase 2B catalytic subunit beta isoform;Serine/threonine-protein phosphatase	PPP3CB	1.51	0.00816817	0.848
Q6P9B6;H3BM75;H3BUB0;H3BTC5;H3BQ13;H3BPI4	Q6P9B6;H3BM75	TLD domain-containing protein 1	TLDC1	2.03	0.00827809	0.848
sp|A080369|abysis_80369;sp|A039537|abysis_39537;sp|A050481|abysis_50481;sp|A006780|abysis_6780;sp|A018897|abysis_18897;sp|A034852|abysis_34852;sp|A040499|abysis_40499;sp|A047319|abysis_47319;sp|A047302|abysis_47302;sp|A047324|abysis_47324;sp|A029513|abysis_29513;sp|A087595|abysis_87595;sp|A053172|abysis_53172;sp|A016021|abysis_16021;sp|A047667|abysis_47667;sp|A048910|abysis_48910;sp|A066066|abysi…	sp|A080369|abysis_80369			3.25	0.00829481	0.849
Q8N6R0	Q8N6R0	Methyltransferase-like protein 13	METTL13	1.8	0.00834192	0.849
F5GWA4	F5GWA4		KCTD10	3.02	0.00838335	0.849
Q9Y230;X6R2L4;M0R0Z0;M0QXZ7;A0A1W2PS48	Q9Y230	RuvB-like 2	RUVBL2	1.31	0.00847657	0.849
Q12765;C9K052;B8ZZP4;C9J7U9	Q12765	Secernin-1	SCRN1	1.42	0.00849637	0.849
Q96L96	Q96L96	Alpha-protein kinase 3	ALPK3	3.46	0.00851487	0.849
Q96C36;A0A087WTV6;J3KR12;A0A087WX69;A0A087WZF0	Q96C36;A0A087WTV6;J3KR12	Pyrroline-5-carboxylate reductase 2	PYCR2	2.22	0.00854487	0.85
P07333;E9PEK4	P07333;E9PEK4	Macrophage colony-stimulating factor 1 receptor	CSF1R	2.05	0.00861066	0.85
sp|A078108|abysis_78108	sp|A078108|abysis_78108			3.05	0.00862187	0.85
A0A8I5KVF8;Q8N3U4;B1AMT4;A0A8I5KUG8;B1AMT1;B1AMT2;B1AMT3;B1AMT0;C9J3T3	A0A8I5KVF8;Q8N3U4	Cohesin subunit SA-2	STAG2	1.83	0.0086265	0.85
Q00534	Q00534	Cyclin-dependent kinase 6	CDK6	1.82	0.00865618	0.85
Q8N1F8;H7C2J7;M0QYE5;H7C236	Q8N1F8	Serine/threonine-protein kinase 11-interacting protein	STK11IP	1.36	0.00865892	0.85
A0A804HLB0;Q6KCM7;A0A804HI56;H7C4Z4;M0QZT4;M0QZP9	A0A804HLB0;Q6KCM7;A0A804HI56	Calcium-binding mitochondrial carrier protein SCaMC-2	SLC25A25	3.66	0.00865929	0.85
P35580	P35580	Myosin-10	MYH10	2.43	0.00870491	0.85
J3KPH8;Q8WUI4;H0YH91;A0A087WYQ4;C9J102;C9JNI4;F8VWY3;C9JEB6;H0YI15;C9JBC2;C9JVZ1;C9JF80;C9JAH2	J3KPH8;Q8WUI4	Histone deacetylase;Histone deacetylase 7	HDAC7	3.31	0.00878164	0.851
Q9Y6N7;A0A087WZ85;A0A0A0MSX4;H7C4Y7;H7C545;F8WBR3;R4GMM8;F8W703;Q9HCK4	Q9Y6N7;A0A087WZ85;A0A0A0MSX4	Roundabout homolog 1	ROBO1	1.99	0.00883778	0.851
Q04941	Q04941	Proteolipid protein 2	PLP2	4.24	0.00887464	0.851
P61224;E7ESV4;F5H7Y6;F5GX62;A6NIZ1;F5H004;F5H6R7;F5H0B7;F5H500;F5GYB5;F5H077;F5GWU8;F5H491;F5H4H0;F5GYH7;F8WBC0	P61224;E7ESV4;F5H7Y6;F5GX62;A6NIZ1;F5H004;F5H6R7	Ras-related protein Rap-1b;Ras-related protein Rap-1b-like protein	RAP1B	1.13	0.0088895	0.851
Q13045;K7EQZ7	Q13045	Protein flightless-1 homolog	FLII	1.09	0.00889382	0.851
C9J7K9;O15162;C9J0H3;C9J9P4;C9JE06;H7C5I5	C9J7K9;O15162;C9J0H3;C9J9P4;C9JE06;H7C5I5	Phospholipid scramblase 1	PLSCR1	5.25	0.00895472	0.851
Q9NQT5;A0A7I2V328	Q9NQT5	Exosome complex component RRP40	EXOSC3	2	0.00901869	0.851
A0A494C1V1;Q6ZNJ1;H0Y764;H7C3Y7;H7C408;H7C354	A0A494C1V1;Q6ZNJ1;H0Y764;H7C3Y7	Neurobeachin-like protein 2	NBEAL2	4.18	0.0090954	0.852
Q01970	Q01970	1-phosphatidylinositol 4,5-bisphosphate phosphodiesterase beta-3	PLCB3	1.18	0.00910305	0.852
Q13867;K7ES02;K7ESE8;J3KSD8;J3KS79;K7ENH5	Q13867;K7ES02;K7ESE8;J3KSD8	Bleomycin hydrolase	BLMH	1.23	0.00911562	0.852
Q9H8S9	Q9H8S9	MOB kinase activator 1A	MOB1A	1.38	0.00922765	0.852
P40123;E9PDI2;B7Z385;F8WDB9;F8WEW0	P40123;E9PDI2;B7Z385	Adenylyl cyclase-associated protein 2;Adenylyl cyclase-associated protein	CAP2	1.39	0.00936751	0.853
P50613;D6RAD4;D6R9G1;D6REC6;D6RFL0;D6RGG9;D6RI01;D6R9Z2;D6RF14;D6RIG9	P50613;D6RAD4;D6R9G1	Cyclin-dependent kinase 7	CDK7	3	0.00936874	0.853
B0I1T2;A0A3B3IU30;F8WEW9	B0I1T2;A0A3B3IU30	Unconventional myosin-Ig;Minor histocompatibility antigen HA-2	MYO1G	3.44	0.00937645	0.853
sp|A078225|abysis_78225	sp|A078225|abysis_78225			2.79	0.00945943	0.853
Q14643;A0A3F2YNW8;A0A3B3IU04;A0A3B3ITU8;A0A3B3ITQ1;A0A3B3IU13;A0A3B3IU05;A0A3B3IRP0;A0A8C8KBY2;B7ZMI3;A0A3B3ITM6;A0A3B3IRT5;A0A3B3ITQ4;A0A3B3ITM1;A0A3B3IS59;A0A3B3ISR4;A0A3B3ISE3	Q14643;A0A3F2YNW8;A0A3B3IU04;A0A3B3ITU8;A0A3B3ITQ1;A0A3B3IU13;A0A3B3IU05;A0A3B3IRP0;A0A8C8KBY2	Inositol 1,4,5-trisphosphate receptor type 1	ITPR1	2.12	0.00948324	0.853
Q5JS54;D6RB92;F2Z3E0	Q5JS54;D6RB92	Proteasome assembly chaperone 4	PSMG4	3.4	0.00951362	0.853
Q5T1V6;Q5T1W1;B7ZBU3;H0Y6Y1;H0Y7Z8;Q5T1V5	Q5T1V6	Probable ATP-dependent RNA helicase DDX59	DDX59	2.45	0.00954524	0.853
O00339;H0YBF2;H0YBN2;H0YBM3;E5RJM4;H0YBV5	O00339	Matrilin-2	MATN2	2.12	0.00957928	0.853
P48426;H7BXS3;S4R320	P48426	Phosphatidylinositol 5-phosphate 4-kinase type-2 alpha	PIP4K2A	1.44	0.00958242	0.853
A6NC98	A6NC98	Coiled-coil domain-containing protein 88B	CCDC88B	3.23	0.00960459	0.854
F8VV56;F8W022;F8VWK8;P08962;F8VNT9	F8VV56;F8W022;F8VWK8;P08962;F8VNT9	Tetraspanin;CD63 antigen	CD63	3.53	0.00960537	0.854
E9PJ55;Q9NUJ3;H0YES4;R4GNF5;E9PP52;E9PMB0;E9PS88	E9PJ55;Q9NUJ3	T-complex protein 11-like protein 1	TCP11L1	2.21	0.00960657	0.854
Q9UNF1;Q5H909;Q5H907;A0A087X070;G5E9N2;Q12816	Q9UNF1;Q5H909;Q5H907	Melanoma-associated antigen D2	MAGED2	2.18	0.00961415	0.854
P62495;B7Z7P8;I3L492;D6RJE8;D6RCB3	P62495;B7Z7P8	Eukaryotic peptide chain release factor subunit 1	ETF1	1.33	0.00965598	0.854
Q16777;Q6FI13	Q16777;Q6FI13	Histone H2A type 2-C;Histone H2A type 2-A	HIST2H2AC;HIST2H2AA3	2.35	0.00966962	0.854
P04899	P04899	Guanine nucleotide-binding protein G(i) subunit alpha-2	GNAI2	1.25	0.00969358	0.854
P04350;M0QY85;M0R278;M0R0X0;M0QY37;M0QX14;M0QZL7;M0R1I1;M0R2T4;A0A075B724	P04350	Tubulin beta-4A chain	TUBB4A	1.95	0.00970663	0.854
Q7Z4H8;H0YEM3	Q7Z4H8	KDEL motif-containing protein 2	KDELC2	1.62	0.00972341	0.854
A0A0D9SGF6	A0A0D9SGF6		SPTAN1	2.2	0.00975171	0.854
O95497	O95497	Pantetheinase	VNN1	2.27	0.00975727	0.854
sp|A081381|abysis_81381;sp|A063753|abysis_63753;sp|A058819|abysis_58819;sp|A058776|abysis_58776;sp|A052731|abysis_52731	sp|A081381|abysis_81381			3.55	0.00977591	0.854
A0A0D9SFG6;Q99418;G5E9B7;M0R2J0;F8W8E2;A0A286YF81;M0QZ92	A0A0D9SFG6;Q99418;G5E9B7;M0R2J0;F8W8E2	Cytohesin-2	CYTH2	1.94	0.00978148	0.854
A0A182DWE9;A0A140T915;A0A140T9Y2;A0A140T9T6	A0A182DWE9;A0A140T915;A0A140T9Y2;A0A140T9T6			2.59	0.00980289	0.854
Q99571;F5H1M6;H0YF70;F5GZQ9	Q99571	P2X purinoceptor 4	P2RX4	2.85	0.00987286	0.854
Q9H4E7;G3V2J3;G3V333;B4DY27	Q9H4E7	Differentially expressed in FDCP 6 homolog	DEF6	3.39	0.00991585	0.855
P02042;E9PFT6	P02042;E9PFT6	Hemoglobin subunit delta	HBD	1.5	0.0099559	0.855
Q9H6X2;A0A7P0Z463;H0YC24;A0A7P0T9B0	Q9H6X2;A0A7P0Z463;H0YC24;A0A7P0T9B0	Anthrax toxin receptor 1	ANTXR1	3.32	0.00996723	0.855

## Sheet: down
Protein_IDs	Majority_protein_IDs	Protein_names	Gene_names	case_vs_control_ratio	case_vs_control_p.val	case_vs_control_p.adj
Q8IWW8;E5RFL4;B4DV11;B4DFI7	Q8IWW8	Hydroxyacid-oxoacid transhydrogenase, mitochondrial	ADHFE1	-7.34	8.32604e-11	7.71e-06
Q14749	Q14749	Glycine N-methyltransferase	GNMT	-11.1	1.15722e-10	7.71e-06
P11509;M0R2Z4	P11509	Cytochrome P450 2A6	CYP2A6	-11.2	1.19095e-10	7.71e-06
P15428;E9PBZ2;D6RA66;D6RA83;E9PD69;D6RHF8	P15428;E9PBZ2	15-hydroxyprostaglandin dehydrogenase [NAD(+)]	HPGD	-10.2	1.28793e-10	7.71e-06
Q15800;D6RDP9;D6R952;D6REA2	Q15800;D6RDP9;D6R952	Methylsterol monooxygenase 1	MSMO1	-8.55	2.72607e-10	3.02e-05
P00167;J3KNC7	P00167	Cytochrome b5	CYB5A	-7.81	3.92718e-10	6.29e-05
O15488;A0A1W2PQ75;E5RIC9;J3QSZ3	O15488;A0A1W2PQ75	Glycogenin-2	GYG2	-7.64	1.06873e-09	0.000425
P02795;H3BSP9;Q8N339;H3BSF1	P02795	Metallothionein-2	MT2A	-11.3	1.35619e-09	0.000593
O43741	O43741	5-AMP-activated protein kinase subunit beta-2	PRKAB2	-8.29	1.40875e-09	0.000622
Q8TDX5	Q8TDX5	2-amino-3-carboxymuconate-6-semialdehyde decarboxylase	ACMSD	-6.05	1.74435e-09	0.000861
Q9ULD0	Q9ULD0	2-oxoglutarate dehydrogenase-like, mitochondrial	OGDHL	-6.53	2.1524e-09	0.00117
O15020;A0A087WYQ1;A4QPE4	O15020;A0A087WYQ1	Spectrin beta chain, non-erythrocytic 2	SPTBN2	-6.09	3.2013e-09	0.0019
O14957	O14957	Cytochrome b-c1 complex subunit 10	UQCR11	-8.59	3.68097e-09	0.00219
Q06520	Q06520	Bile salt sulfotransferase	SULT2A1	-5.74	3.81565e-09	0.00226
P48065;F5H2T6;F5H4L6	P48065	Sodium- and chloride-dependent betaine transporter	SLC6A12	-6.42	4.14268e-09	0.00243
Q7Z5P4	Q7Z5P4	17-beta-hydroxysteroid dehydrogenase 13	HSD17B13	-8.98	4.19821e-09	0.00246
O75452	O75452	Retinol dehydrogenase 16	RDH16	-7.91	4.32e-09	0.00252
Q00G26	Q00G26	Perilipin-5	PLIN5	-6.2	4.67327e-09	0.00268
Q02338;E9PCG9;C9K0G7;C9JM78;C9JQ90;A0A0G2JRX6;H7C2W1;C9JEB9	Q02338;E9PCG9;C9K0G7	D-beta-hydroxybutyrate dehydrogenase, mitochondrial	BDH1	-5.49	4.6733e-09	0.00268
Q9H2A2	Q9H2A2	Aldehyde dehydrogenase family 8 member A1	ALDH8A1	-6.37	4.84367e-09	0.00275
Q9UBR1;Q6AHZ8;F8WC94	Q9UBR1	Beta-ureidopropionase	UPB1	-7.97	5.23161e-09	0.00297
Q96PD5;M0R2W8;CON__ENSEMBL:ENSBTAP00000016285;M0QYW3	Q96PD5	N-acetylmuramoyl-L-alanine amidase	PGLYRP2	-6.17	5.62714e-09	0.00318
O14756;G3V3Y9;G3V508	O14756	17-beta-hydroxysteroid dehydrogenase type 6	HSD17B6	-8.52	6.20007e-09	0.00346
Q6PHW0;C9JXJ9;F6VN83;F5H543;H7C0X6	Q6PHW0;C9JXJ9;F6VN83;F5H543	Iodotyrosine dehalogenase 1	IYD	-8.22	6.7138e-09	0.00369
P08319;D6R9K8;D6RIB1;H0Y9N0	P08319;D6R9K8	Alcohol dehydrogenase 4	ADH4	-6.72	6.99395e-09	0.00381
Q9BYV1	Q9BYV1	Alanine--glyoxylate aminotransferase 2, mitochondrial	AGXT2	-7.06	7.14012e-09	0.00387
O75936;E9PKC9	O75936	Gamma-butyrobetaine dioxygenase	BBOX1	-9.99	7.30713e-09	0.00393
Q14244;A0A087WZ40	Q14244;A0A087WZ40	Ensconsin	MAP7	-5.98	8.16059e-09	0.00435
P05386	P05386	60S acidic ribosomal protein P1	RPLP1	-11.2	8.94967e-09	0.0047
P21953	P21953	2-oxoisovalerate dehydrogenase subunit beta, mitochondrial	BCKDHB	-7.1	8.97243e-09	0.00471
Q06278;H7BXF7;H7C3Q1	Q06278	Aldehyde oxidase	AOX1	-5.21	9.1289e-09	0.00477
P20813;M0QZJ2;A0A2R8YFA4	P20813;M0QZJ2	Cytochrome P450 2B6	CYP2B6	-8.65	9.18724e-09	0.0048
H3BRN4;P80404;H3BNQ7;H3BPW8;H3BMJ9;H3BRJ1	H3BRN4;P80404;H3BNQ7	4-aminobutyrate aminotransferase, mitochondrial	ABAT	-5.11	9.80477e-09	0.00509
O95954;A0A0G2JQF2;B7WPK3;A0A804HKA5;Q49AR5	O95954;A0A0G2JQF2;B7WPK3	Formimidoyltransferase-cyclodeaminase;Glutamate formimidoyltransferase;Formimidoyltetrahydrofolate cyclodeaminase	FTCD	-5.72	1.09771e-08	0.00562
P28332;Q8IUN7;D6RH17;D6RDN5;H0Y8U2	P28332;Q8IUN7;D6RH17	Alcohol dehydrogenase 6	ADH6	-4.96	1.11039e-08	0.00567
Q16822;H0YM31	Q16822;H0YM31	Phosphoenolpyruvate carboxykinase [GTP], mitochondrial	PCK2	-4.26	1.11278e-08	0.00568
Q9NYQ3;Q5QP02	Q9NYQ3;Q5QP02	Hydroxyacid oxidase 2	HAO2	-7.78	1.16691e-08	0.0059
A0A0D9SG04;A0A0B4J1Z0;C9JAU3;C9J8C4;C9JWZ0;C9J5Y6;C9JK90;A0A7P0TAB9;F8WEK0;A0A7P0TAY7;A0A7P0T9X3	A0A0D9SG04		COBLL1	-7.22	1.18532e-08	0.00597
P35573;A0A1C7CYW1	P35573	Glycogen debranching enzyme;4-alpha-glucanotransferase;Amylo-alpha-1,6-glucosidase	AGL	-4.58	1.25068e-08	0.0063
P45954	P45954	Short/branched chain specific acyl-CoA dehydrogenase, mitochondrial	ACADSB	-5.37	1.70659e-08	0.00886
Q9UL12;Q5SYV1;Q5SYV2;Q9UL10	Q9UL12;Q5SYV1	Sarcosine dehydrogenase, mitochondrial	SARDH	-5	1.84647e-08	0.00959
P02763	P02763	Alpha-1-acid glycoprotein 1	ORM1	-7.41	1.85585e-08	0.00964
Q68CK6;H3BTX9;H3BNJ9;H3BP39;H3BM61;H3BQ84;H3BP79	Q68CK6;H3BTX9	Acyl-coenzyme A synthetase ACSM2B, mitochondrial	ACSM2B	-5.57	1.97079e-08	0.0102
Q9HBI6;F8W978	Q9HBI6;F8W978	Phylloquinone omega-hydroxylase CYP4F11	CYP4F11	-6.29	2.00716e-08	0.0104
Q9UP52;E7ET36;H7C544	Q9UP52	Transferrin receptor protein 2	TFR2	-6.79	2.17159e-08	0.0112
Q9UI17;Q8TCC6;E5RG50;E5RK15	Q9UI17;Q8TCC6	Dimethylglycine dehydrogenase, mitochondrial	DMGDH	-5.51	2.20068e-08	0.0113
A0A1W2PRB8;Q9NVC6;A0A1W2PS69;E9PM72;A0A1W2PRX4;A0A1W2PS27;A0A1W2PNW7;A0A1W2PQ48;A0A1W2PNF3;A0A1W2PPP8;A0A1W2PR99;A0A1W2PQE4;E9PKQ4	A0A1W2PRB8			-4.36	2.30226e-08	0.0118
Q99424;C9J0G0;C9JY29;H7C4Q2;H7C4Y2	Q99424;C9J0G0	Peroxisomal acyl-coenzyme A oxidase 2;Acyl-coenzyme A oxidase	ACOX2	-5.12	2.39659e-08	0.0122
Q6NUN0;I3L536;A0A087WTR4	Q6NUN0	Acyl-coenzyme A synthetase ACSM5, mitochondrial	ACSM5	-5.4	2.54792e-08	0.0128
O14832;B1ALH6;C9IYS5;C9JR86	O14832;B1ALH6;C9IYS5	Phytanoyl-CoA dioxygenase, peroxisomal	PHYH	-5.55	2.62423e-08	0.0132
A6NLP5;E9PNF0	A6NLP5	Tetratricopeptide repeat protein 36	TTC36	-7.75	2.69268e-08	0.0134
P27169;F8WF42	P27169	Serum paraoxonase/arylesterase 1	PON1	-5.16	2.74263e-08	0.0136
P11168;A0A0C4DH64	P11168	Solute carrier family 2, facilitated glucose transporter member 2	SLC2A2	-6.25	2.82473e-08	0.014
P50226;E9PKW4;E9PM76	P50226;E9PKW4	Sulfotransferase 1A2;Sulfotransferase	SULT1A2	-6.53	3.15534e-08	0.0155
P49638	P49638	Alpha-tocopherol transfer protein	TTPA	-5.7	3.71434e-08	0.018
Q9UI32;G5E9X4;E5G745;A0A087X004;F8WBL8;A8K0A6;C9J3Q2	Q9UI32;G5E9X4;E5G745	Glutaminase liver isoform, mitochondrial	GLS2	-6.74	4.07283e-08	0.0195
Q9Y5C1	Q9Y5C1	Angiopoietin-related protein 3	ANGPTL3	-6.45	4.44576e-08	0.0209
Q00266;B1ANE6	Q00266	S-adenosylmethionine synthase isoform type-1	MAT1A	-5.05	4.49751e-08	0.0211
Q5JTJ3	Q5JTJ3	Cytochrome c oxidase assembly factor 6 homolog	COA6	-4.28	4.74829e-08	0.022
Q9H788;H0YAT1	Q9H788;H0YAT1	SH2 domain-containing protein 4A	SH2D4A	-5.19	4.82927e-08	0.0223
Q9NR19;C9JY31;F8WCJ4;C9IYL0;B4DEH9;C9J7L5;C9JXD9;F8WDJ9	Q9NR19	Acetyl-coenzyme A synthetase, cytoplasmic	ACSS2	-5.07	4.92827e-08	0.0227
P19652	P19652	Alpha-1-acid glycoprotein 2	ORM2	-7.13	5.14751e-08	0.0234
Q6EEV6	Q6EEV6	Small ubiquitin-related modifier 4	SUMO4	-5.82	5.18449e-08	0.0235
P40855;Q5QNY5;B7Z8B3;E9PS71;E9PPB4	P40855;Q5QNY5	Peroxisomal biogenesis factor 19	PEX19	-7.22	5.53186e-08	0.0247
Q92667;I3L0W0;I3L2A2;I3L2N7;I3NI36;I3L364;I3L3K1;I3L0V5;I3L3V6	Q92667	A-kinase anchor protein 1, mitochondrial	AKAP1	-5.07	5.8564e-08	0.0257
O15229	O15229	Kynurenine 3-monooxygenase	KMO	-5.17	6.08203e-08	0.0263
P28845;A0A0A0MQV1;A0A087WU76	P28845;A0A0A0MQV1	Corticosteroid 11-beta-dehydrogenase isozyme 1	HSD11B1	-6.34	6.50575e-08	0.0275
H0YIV9;O43716;F8VRU3;J3KMY1	H0YIV9;O43716	Glutamyl-tRNA(Gln) amidotransferase subunit C, mitochondrial	GATC	-6.99	6.54931e-08	0.0276
Q02252;G3V4Z4	Q02252;G3V4Z4	Methylmalonate-semialdehyde dehydrogenase [acylating], mitochondrial	ALDH6A1	-4.37	6.6557e-08	0.0279
P33121;E7EPM6;B7Z3Z9;D6RER0;H0Y9U7;H0Y9Z9;D6RG07	P33121;E7EPM6;B7Z3Z9;D6RER0	Long-chain-fatty-acid--CoA ligase 1	ACSL1	-3.95	6.69726e-08	0.028
Q96JY6;C9JS55;C9JSR2;C9K0F0;B3KPU0;C9J0X3;C9J760;H0YBP7;A0A087WXJ0;F8WFB8;A0A087WU48	Q96JY6;C9JS55;C9JSR2	PDZ and LIM domain protein 2	PDLIM2	-6.18	6.74708e-08	0.0281
P08697;A0A0G2JPA8;C9JMH6;A0A0J9YY65;C9JPV4;A0A0J9YWQ3	P08697;A0A0G2JPA8;C9JMH6;A0A0J9YY65	Alpha-2-antiplasmin	SERPINF2	-4.15	6.74757e-08	0.0282
O60936;H3BUP2;H3BUN4;H3BM67;J3QLT7;H3BQJ5	O60936;H3BUP2;H3BUN4;H3BM67	Nucleolar protein 3	NOL3	-5.82	6.8144e-08	0.0283
Q9HCL2;Q5VW52	Q9HCL2;Q5VW52	Glycerol-3-phosphate acyltransferase 1, mitochondrial	GPAM	-5.57	7.16709e-08	0.0292
K7ER74;P02655;Q6P163;V9GYJ8;K7EMC3	K7ER74;P02655;Q6P163	Apolipoprotein C-II;Proapolipoprotein C-II	APOC4-APOC2;APOC2	-10.6	7.47501e-08	0.03
Q53FZ2;H3BSM0;H3BVD5;H3BV29;H3BUF2;H3BT38;H3BR33	Q53FZ2;H3BSM0	Acyl-coenzyme A synthetase ACSM3, mitochondrial	ACSM3	-8.15	7.53612e-08	0.0301
P20962;F5GXR3	P20962	Parathymosin	PTMS	-4.31	7.85857e-08	0.0311
Q5VUM1	Q5VUM1	Succinate dehydrogenase assembly factor 4, mitochondrial	SDHAF4	-6.12	9.00331e-08	0.0344
A0A0G2JMG3;A0A1W2PPQ8;A0A0J9YVW5;A0A804HJ04	A0A0G2JMG3			-6.11	9.84987e-08	0.0366
P23141;A0A140TA63;H3BSU0;Q9UKY3;H3BQR4;REV__F8WE95;REV__Q8NET5	P23141	Liver carboxylesterase 1	CES1	-4.78	1.01196e-07	0.0373
Q9H2M3;E5RH96	Q9H2M3	S-methylmethionine--homocysteine S-methyltransferase BHMT2	BHMT2	-7.55	1.02093e-07	0.0375
Q9Y5J9;G3XAN8;E9PIR3	Q9Y5J9;G3XAN8	Mitochondrial import inner membrane translocase subunit Tim8 B	TIMM8B	-6.68	1.07588e-07	0.0388
Q08477	Q08477	Docosahexaenoic acid omega-hydroxylase CYP4F3	CYP4F3	-5.76	1.085e-07	0.039
Q9Y2P5	Q9Y2P5	Bile acyl-CoA synthetase	SLC27A5	-6.03	1.10165e-07	0.0394
B1ALY0;C9JZH4;A0A669KBK1	B1ALY0		PALM2-AKAP2	-6.31	1.11014e-07	0.0396
O00193;E9PM92;E9PRZ9;E9PQA1	O00193;E9PM92;E9PRZ9	Small acidic protein	SMAP;C11orf58	-5.79	1.15854e-07	0.0407
P05177	P05177	Cytochrome P450 1A2	CYP1A2	-8.43	1.16059e-07	0.0407
Q96B36;H9KV91;M0R2V8	Q96B36;H9KV91	Proline-rich AKT1 substrate 1	AKT1S1	-5.62	1.23295e-07	0.0425
Q14117;E5RG28;H0YEV7	Q14117	Dihydropyrimidinase	DPYS	-4.83	1.34068e-07	0.045
P31513;V9GZ60;V9GYP3	P31513	Dimethylaniline monooxygenase [N-oxide-forming] 3	FMO3	-5.46	1.37934e-07	0.0458
Q9BUT9;I3L172	Q9BUT9	Protein FAM195A	FAM195A	-4.91	1.47643e-07	0.0479
P54840;REV__Q5T601;REV__A0A0C4DH10	P54840	Glycogen [starch] synthase, liver	GYS2	-3.98	1.54477e-07	0.0493
P47989	P47989	Xanthine dehydrogenase/oxidase;Xanthine dehydrogenase;Xanthine oxidase	XDH	-4.9	1.54566e-07	0.0493
O00748;J3QSC0;J3QLP1;A0A0C4DGH1;Q5XG92	O00748;J3QSC0	Cocaine esterase	CES2	-4.14	1.5576e-07	0.0495
Q8NCR9	Q8NCR9	Clarin-3	CLRN3	-8.18	1.59814e-07	0.0503
P51649;C9J8Q5;A0A5F9ZI23;A0A5F9ZH98;A0A5F9ZH05	P51649;C9J8Q5;A0A5F9ZI23	Succinate-semialdehyde dehydrogenase, mitochondrial	ALDH5A1	-3.87	1.62585e-07	0.0508
Q86WU2	Q86WU2	Probable D-lactate dehydrogenase, mitochondrial	LDHD	-4.33	1.7403e-07	0.0529
H7BXR3;H7BZX1;C9IZ89;C9J3W4;C9JL62;C9J348;C9J7Q5;C9JBR8	H7BXR3;H7BZX1		SORBS2	-5.39	1.7525e-07	0.0531
P50225;H3BRY5;H3BQX5;O75897	P50225;H3BRY5;H3BQX5	Sulfotransferase 1A1;Sulfotransferase	SULT1A1	-4.77	1.76796e-07	0.0534
Q9BQB6;I3L3B4;F8W9H0;E9PLN8;H0YD56	Q9BQB6;I3L3B4;F8W9H0;E9PLN8	Vitamin K epoxide reductase complex subunit 1	VKORC1	-8.28	1.77734e-07	0.0536
Q8WV74	Q8WV74	Nucleoside diphosphate-linked moiety X motif 8, mitochondrial	NUDT8	-5.14	1.80787e-07	0.0541
Q9UN36;G3V2I9;G3V5S0;G3V383;G3V5P9;G3V2S0;G3V552;G3V3P6;G3V4T9;G3V2T2;G3V3P1;G3V3D5;G3V5B5;G3V3L1	Q9UN36;G3V2I9;G3V5S0	Protein NDRG2	NDRG2	-4.07	1.93255e-07	0.0563
P34896;J3KRZ5;J3KRK5	P34896	Serine hydroxymethyltransferase, cytosolic	SHMT1	-4.18	1.95524e-07	0.0567
Q9Y6L6	Q9Y6L6	Solute carrier organic anion transporter family member 1B1	SLCO1B1	-5.52	1.96015e-07	0.0568
P00439;J3KND8;F8W0A0;A0A0U1RQI3;F8W1D4;A0A0U1RQY4;Q8IWU9	P00439;J3KND8	Phenylalanine-4-hydroxylase	PAH	-3.92	2.0663e-07	0.0585
Q93088;E5RJH0	Q93088;E5RJH0	Betaine--homocysteine S-methyltransferase 1	BHMT	-5.22	2.09125e-07	0.0589
Q96NU7;H0YI62	Q96NU7	Probable imidazolonepropionase	AMDHD1	-5.96	2.11264e-07	0.0593
A0A0C4DGA7;O94929;A0A0A0MRD5;D6RHE7	A0A0C4DGA7;O94929	Actin-binding LIM protein 3	ABLIM3	-5.45	2.17354e-07	0.0602
P51687;F8VVW9	P51687	Sulfite oxidase, mitochondrial	SUOX	-4.12	2.17503e-07	0.0602
A0A6Q8PHC6;P50440;A0A6Q8PGA2;A0A6Q8PFC6;H0YMX4;H0YKW9;A0A6Q8PF48;H0YN43;H0YL75	A0A6Q8PHC6;P50440;A0A6Q8PGA2;A0A6Q8PFC6	Glycine amidinotransferase, mitochondrial	GATM	-4.24	2.25795e-07	0.0615
G8JLA2;F8VZU9;F8W180;F8VXL3	G8JLA2;F8VZU9;F8W180		MYL6	-7.36	2.28613e-07	0.0619
M0QXZ5;Q96B54	M0QXZ5;Q96B54	Zinc finger protein 428	ZNF428	-5.16	2.31401e-07	0.0623
A0A6Q8PH20;B7Z574;E7EVY3;H0YA91	A0A6Q8PH20;B7Z574;E7EVY3		CAST	-4.87	2.36333e-07	0.063
P50053	P50053	Ketohexokinase	KHK	-5.94	2.3878e-07	0.0633
Q9HAW7;H0Y8D7	Q9HAW7	UDP-glucuronosyltransferase 1-7	UGT1A7	-6.13	2.39877e-07	0.0635
Q4G0N4	Q4G0N4	NAD kinase 2, mitochondrial	NADK2	-3.61	2.58561e-07	0.0667
Q8N5Z0;D6REB9;D6RFY7;D6RC56	Q8N5Z0;D6REB9	Kynurenine/alpha-aminoadipate aminotransferase, mitochondrial	AADAT	-7.1	2.78319e-07	0.0699
P00966;Q5T6L6;Q5T6L5	P00966;Q5T6L6	Argininosuccinate synthase	ASS1	-4.18	2.97642e-07	0.0728
A0A0J9YXN7;Q96Q06	A0A0J9YXN7;Q96Q06	Perilipin-4	PLIN4	-7.02	3.04341e-07	0.0738
Q08AH3;F5GWL3;E7EPS5;I3L2Y5;I3L438;H3BRR3;I3L339	Q08AH3;F5GWL3	Acyl-coenzyme A synthetase ACSM2A, mitochondrial	ACSM2A	-7.77	3.05695e-07	0.074
O75600;H7BZ75;C9IZC9;F2Z340	O75600	2-amino-3-ketobutyrate coenzyme A ligase, mitochondrial	GCAT	-5.41	3.07854e-07	0.0743
P00740	P00740	Coagulation factor IX;Coagulation factor IXa light chain;Coagulation factor IXa heavy chain	F9	-4.89	3.14354e-07	0.0752
Q92747	Q92747	Actin-related protein 2/3 complex subunit 1A	ARPC1A	-5.93	3.23068e-07	0.0764
P21549	P21549	Serine--pyruvate aminotransferase	AGXT	-3.45	3.27589e-07	0.0771
P21695	P21695	Glycerol-3-phosphate dehydrogenase [NAD(+)], cytoplasmic	GPD1	-4.64	3.30816e-07	0.0775
P11498;A0A494C016;A0A494C101;A0A494C0T2;E9PRE7;A0A494BZT5	P11498	Pyruvate carboxylase, mitochondrial	PC	-3.79	3.36813e-07	0.0783
P48449;A0A0G2JQD0;C9J315;A0A0G2JS81;H7C3A5	P48449;A0A0G2JQD0	Lanosterol synthase	LSS	-3.61	3.39018e-07	0.0786
Q16836;E9PF18;A0A0A0MSE2;A0A804HLB5;A0A1W2PQV5;A0A804HJW7;A0A1W2PP40	Q16836;E9PF18;A0A0A0MSE2;A0A804HLB5;A0A1W2PQV5;A0A804HJW7	Hydroxyacyl-coenzyme A dehydrogenase, mitochondrial	HADH	-4.27	3.75762e-07	0.0833
Q96EY8;S4R3P5;F5H4Z7;A0A087X114;S4R3Z1;F5H079	Q96EY8;S4R3P5;F5H4Z7	Cob(I)yrinic acid a,c-diamide adenosyltransferase, mitochondrial	MMAB	-4.74	3.82883e-07	0.0842
O75531;E9PJJ8	O75531	Barrier-to-autointegration factor;Barrier-to-autointegration factor, N-terminally processed	BANF1	-4.82	3.83565e-07	0.0843
Q8NI22;H7BZ18;A0A3B3IU18	Q8NI22	Multiple coagulation factor deficiency protein 2	MCFD2	-7.84	3.90693e-07	0.0851
P33261;A0A087X125	P33261	Cytochrome P450 2C19	CYP2C19	-9.16	3.99163e-07	0.0861
Q6IB77;K7ES21	Q6IB77	Glycine N-acyltransferase	GLYAT	-5.79	4.2812e-07	0.0894
P18859;A8MUH2	P18859;A8MUH2	ATP synthase-coupling factor 6, mitochondrial	ATP5J	-8.16	4.30456e-07	0.0897
F5H8H2;Q03426;A0A1B0GWC2;F5H092;F5GXC0;F5H163;F5H368;A0A1W2PS16;A0A1B0GWF3;A0A0B4J236	F5H8H2;Q03426;A0A1B0GWC2;F5H092	Mevalonate kinase	MVK	-4.47	4.34727e-07	0.0901
Q9BW72	Q9BW72	HIG1 domain family member 2A, mitochondrial	HIGD2A	-6.43	4.4664e-07	0.0914
O95154	O95154	Aflatoxin B1 aldehyde reductase member 3	AKR7A3	-3.71	4.48051e-07	0.0915
P05089;A0A5F9ZH78;A0A5F9ZGN6	P05089;A0A5F9ZH78;A0A5F9ZGN6	Arginase-1	ARG1	-4.61	4.58443e-07	0.0926
Q9H2B4	Q9H2B4	Sulfate anion transporter 1	SLC26A1	-4.66	4.70312e-07	0.0938
A6ND91;M0QYD4	A6ND91	Putative L-aspartate dehydrogenase	ASPDH	-4.52	4.70666e-07	0.0939
A0A590UJ36;A6NDB9;A0A590UJ23	A0A590UJ36;A6NDB9;A0A590UJ23	Paralemmin-3	PALM3	-4.78	4.78088e-07	0.0946
Q00796;A0A6I8PIS1;H0YKB3;A0A6I8PRA7	Q00796;A0A6I8PIS1	Sorbitol dehydrogenase	SORD	-4.3	4.86895e-07	0.0954
Q02928;A0A0C4DFV7;V9GZ77;V9GYC6;Q5TCH5;V9GYQ2;V9GYK4;V9GY41;A0A087WZX9	Q02928;A0A0C4DFV7;V9GZ77;V9GYC6	Cytochrome P450 4A11	CYP4A11	-6.34	4.94892e-07	0.0962
Q15067;K7ELT1;I3L0T4;I3L4S5;K7ENF1;I3L2U4	Q15067	Peroxisomal acyl-coenzyme A oxidase 1	ACOX1	-3.37	5.18755e-07	0.0989
P13671;C9JC72	P13671	Complement component C6	C6	-4.82	5.43979e-07	0.102
Q99757;M0QXH0;F8WDN2	Q99757;M0QXH0	Thioredoxin, mitochondrial	TXN2	-7.79	5.47463e-07	0.102
P23378;A0A1W2PP74;A0A1W2PPB1;A0A1W2PQV3;A0A1W2PPE1;A0A1W2PQU6;A0A1W2PPK8;A0A1W2PPH6;REV__Q8WVC6	P23378	Glycine dehydrogenase (decarboxylating), mitochondrial	GLDC	-5.98	5.76992e-07	0.105
Q9H3Q1;J3KRZ9;J3QQS6;J3QR93	Q9H3Q1	Cdc42 effector protein 4	CDC42EP4	-6.18	5.92282e-07	0.107
Q8NBU5;A0A7P0TAM5;A0A7P0T9U2;A0A7P0T9B4;A0A7P0T7Z9;A0A7P0Z4J1	Q8NBU5;A0A7P0TAM5;A0A7P0T9U2	ATPase family AAA domain-containing protein 1	ATAD1	-3.14	6.41853e-07	0.111
Q9UDR5;F8WAH1;F8WE53;A0A7P0TAY5;A0A7P0T9N4;A0A7P0TA62;A0A7P0TA09;A0A7P0T8W7;A0A7P0Z428;A0A7P0TBD2;A0A7P0T834;A0A7P0TB07;A0A7P0Z402;A0A7P0Z4M3	Q9UDR5;F8WAH1;F8WE53	Alpha-aminoadipic semialdehyde synthase, mitochondrial;Lysine ketoglutarate reductase;Saccharopine dehydrogenase	AASS	-4.4	6.73469e-07	0.114
Q8N139	Q8N139	ATP-binding cassette sub-family A member 6	ABCA6	-5.35	7.0807e-07	0.117
O14975;G3V1R7	O14975;G3V1R7	Very long-chain acyl-CoA synthetase	SLC27A2	-4.84	7.1213e-07	0.118
A0A0B4J1R2;Q9H6R3;F8VZB4;H0YII9	A0A0B4J1R2;Q9H6R3	Acyl-CoA synthetase short-chain family member 3, mitochondrial	ACSS3	-3.19	7.13652e-07	0.118
P16662;E9PBP8;A0A087X084	P16662;E9PBP8;A0A087X084	UDP-glucuronosyltransferase 2B7	UGT2B7	-4.45	7.31729e-07	0.119
G3V4T6	G3V4T6		GSTZ1	-4.66	7.71732e-07	0.123
P54868	P54868	Hydroxymethylglutaryl-CoA synthase, mitochondrial	HMGCS2	-3.66	7.87889e-07	0.124
Q96C11;F2Z2V1;A0A0U1RRB9;C9J015;A0A0U1RQJ1;A0A0U1RQS3;A0A0U1RR53;J3QKV9	Q96C11;F2Z2V1;A0A0U1RRB9	FGGY carbohydrate kinase domain-containing protein	FGGY	-3.72	7.99603e-07	0.125
Q92954;E9PLR3	Q92954	Proteoglycan 4;Proteoglycan 4 C-terminal part	PRG4	-4.99	8.01527e-07	0.125
Q6XR72	Q6XR72	Zinc transporter 10	SLC30A10	-5.14	8.43523e-07	0.128
Q0VF96	Q0VF96	Cingulin-like protein 1	CGNL1	-4.88	9.08128e-07	0.132
Q9BV57;A0A0G2JQN5;H7C382	Q9BV57	1,2-dihydroxy-3-keto-5-methylthiopentene dioxygenase	ADI1	-6.1	9.60849e-07	0.136
O43903;E9PRR5;E9PQ74;E9PM28;E9PQ37	O43903;E9PRR5;E9PQ74	Growth arrest-specific protein 2	GAS2	-6.05	9.68633e-07	0.136
P42357;F8VNX0;F8W0V1;Q4VB95;H0YHB0	P42357	Histidine ammonia-lyase	HAL	-5.84	9.73059e-07	0.137
Q9UMX5	Q9UMX5	Neudesin	NENF	-3.57	9.95885e-07	0.138
A0A024R5I4;O94956;E9PRW4;A0A0A0MTF1;E9PI53;E9PN87;E9PIU9	A0A024R5I4;O94956;E9PRW4;A0A0A0MTF1	Solute carrier organic anion transporter family member 2B1	SLCO2B1	-4.79	9.99853e-07	0.138
Q15714;A0A087X0H8	Q15714;A0A087X0H8	TSC22 domain family protein 1	TSC22D1	-4.71	1.04467e-06	0.141
P11586;V9GYY3;F5H2F4;V9GZ78;A0A8C8UXK2;V9GY75	P11586;V9GYY3;F5H2F4;V9GZ78	C-1-tetrahydrofolate synthase, cytoplasmic;Methylenetetrahydrofolate dehydrogenase;Methenyltetrahydrofolate cyclohydrolase;Formyltetrahydrofolate synthetase;C-1-tetrahydrofolate synthase, cytoplasmic, N-terminally processed	MTHFD1	-3.35	1.09224e-06	0.144
Q99447;I3L1R7;I3L1L9;I3L2Q1;I3L3V9;I3L1C4;I3L102	Q99447;I3L1R7;I3L1L9;I3L2Q1	Ethanolamine-phosphate cytidylyltransferase	PCYT2	-3.91	1.09275e-06	0.144
Q9BQ61;K7EN60;K7ELS0;K7ERU7	Q9BQ61	Uncharacterized protein C19orf43	C19orf43	-4.29	1.10613e-06	0.144
O95342;A0A3B3IS78;Q53S60;H7C486;A0A3B3ITV9;A0A3B3ISD4	O95342;A0A3B3IS78	Bile salt export pump	ABCB11	-5.6	1.14674e-06	0.147
P22413;E9PE72;A0A3B3IST7;A0A3B3ISN7	P22413	Ectonucleotide pyrophosphatase/phosphodiesterase family member 1;Alkaline phosphodiesterase I;Nucleotide pyrophosphatase	ENPP1	-5.32	1.15208e-06	0.147
Q86X27;A0A0A0MR31;H7C2H2	Q86X27;A0A0A0MR31	Ras-specific guanine nucleotide-releasing factor RalGPS2	RALGPS2	-4.82	1.15756e-06	0.147
P11182;A0A7P0Z494;Q5VVL7;A0A7P0T9W1	P11182;A0A7P0Z494;Q5VVL7;A0A7P0T9W1	Lipoamide acyltransferase component of branched-chain alpha-keto acid dehydrogenase complex, mitochondrial	DBT	-3.26	1.18527e-06	0.149
A0A0A0MRM9;Q14978;S4R349;S4R402;S4R341;S4R3C2	A0A0A0MRM9;Q14978	Nucleolar and coiled-body phosphoprotein 1	NOLC1	-4.44	1.20541e-06	0.15
O75128;H7C1N2;J3KR05;A0A0J9YWK3;A0A3B3IU00;C9J9X1	O75128;H7C1N2;J3KR05	Protein cordon-bleu	COBL	-4.48	1.21914e-06	0.15
P00414	P00414	Cytochrome c oxidase subunit 3	MT-CO3	-7.22	1.23294e-06	0.151
Q9NVS9;J3QQZ9;A0A286YFL3;A0A286YFA1;A0A286YF38	Q9NVS9;J3QQZ9	Pyridoxine-5-phosphate oxidase	PNPO	-3.89	1.23386e-06	0.151
A0A499FJM4;P08684;A0A494C0W7;E7EVM8;C9JBD2;E9PDL8;Q9HB55;C9JA26	A0A499FJM4;P08684;A0A494C0W7;E7EVM8	Cytochrome P450 3A4	CYP3A4	-8.84	1.23629e-06	0.151
O75891;C9IZ36;C9JYZ6;C9JY00;D6RFJ7;F2Z324;F8WC34	O75891	Cytosolic 10-formyltetrahydrofolate dehydrogenase	ALDH1L1	-4.16	1.23851e-06	0.151
P24298	P24298	Alanine aminotransferase 1	GPT	-4.11	1.24931e-06	0.152
P31327;A0A669KBF2	P31327	Carbamoyl-phosphate synthase [ammonia], mitochondrial	CPS1	-3.5	1.2543e-06	0.152
Q9ULX7;U3KPU6	Q9ULX7;U3KPU6	Carbonic anhydrase 14	CA14	-6.41	1.28218e-06	0.153
Q9UKS6;A0A0C4DGG1;E9PIY1;E9PJ75;E9PNM9;E9PJ33;H0YDM6;E9PIZ6	Q9UKS6;A0A0C4DGG1;E9PIY1	Protein kinase C and casein kinase substrate in neurons protein 3	PACSIN3	-4.25	1.28831e-06	0.154
O75356;G3V4I0;G3V450;H0YJH1;G3V3Y0;REV__Q5VUR7;REV__Q5TYW2;REV__Q5SQ80;REV__Q5CZ79;REV__Q4UJ75	O75356;G3V4I0	Ectonucleoside triphosphate diphosphohydrolase 5	ENTPD5	-3.63	1.29608e-06	0.154
P27144;A0A8I5KW96;F8VS11	P27144;A0A8I5KW96;F8VS11	Adenylate kinase 4, mitochondrial	AK4	-4.42	1.29905e-06	0.154
A0A804HJ86;Q9GZZ9;E7EQ61;E7EWE1;C9J5W5;C9JRV9;C9J0F6;D6RJC9;REV__Q6IC98;Q8TEY5	A0A804HJ86;Q9GZZ9;E7EQ61;E7EWE1	Ubiquitin-like modifier-activating enzyme 5	UBA5	-3.42	1.30191e-06	0.154
Q8N5V2;H7BZ39;H7C2C2;C9JTV7	Q8N5V2	Ephexin-1	NGEF	-3.55	1.45139e-06	0.161
Q08174;D6RBG2;H0Y9F5	Q08174	Protocadherin-1	PCDH1	-4.39	1.49278e-06	0.163
Q5VT66;A0A494C1P3;H7BYZ9;X6RIL1;H0YDX4	Q5VT66;A0A494C1P3;H7BYZ9	Mitochondrial amidoxime-reducing component 1	36951	-5.3	1.57116e-06	0.167
P22033	P22033	Methylmalonyl-CoA mutase, mitochondrial	MUT	-2.92	1.60547e-06	0.168
Q8TEB1;H0YL98;H0YN92;H0YM86;H0YNS2;H0YKR8;H0YLH4;H0YMN6;H0YL64;H0YN21;H0YM56;H0YMZ4;H0YL29;H0YLB2;H0YLQ1;H0YLF1;H0YN15;H0YNT0;H0YNK2;H0YN03;H0YLX7;H0YMF7	Q8TEB1;H0YL98	DDB1- and CUL4-associated factor 11	DCAF11	-3.32	1.63075e-06	0.169
Q9NYJ1	Q9NYJ1	Cytochrome c oxidase assembly factor 4 homolog, mitochondrial	COA4	-4.71	1.64193e-06	0.17
P14920;A0A0B4J250;F8VV35;F8W152;A0A0B4J257;F8VVT2	P14920;A0A0B4J250;F8VV35;F8W152	D-amino-acid oxidase	DAO	-5.42	1.7428e-06	0.173
Q9UMX0;H0YDS0;H0YEZ9	Q9UMX0	Ubiquilin-1	UBQLN1	-3.92	1.74393e-06	0.174
C9J3D7;Q9UKG9	C9J3D7;Q9UKG9	Peroxisomal carnitine O-octanoyltransferase	CROT	-4.26	1.75881e-06	0.174
P35520;C9JMA6;H7C2H4;H7C1W6;H7C2W0	P35520	Cystathionine beta-synthase	CBS	-5.04	1.82288e-06	0.176
P34913;E5RFH6;H0YAW7;E5RI53	P34913;E5RFH6	Bifunctional epoxide hydrolase 2;Cytosolic epoxide hydrolase 2;Lipid-phosphate phosphatase	EPHX2	-5.26	1.83371e-06	0.177
Q56VL3;D6RD77;J3KPI9	Q56VL3	OCIA domain-containing protein 2	OCIAD2	-4.71	1.86494e-06	0.178
O75052;E9PSG0	O75052;E9PSG0	Carboxyl-terminal PDZ ligand of neuronal nitric oxide synthase protein	NOS1AP	-4.44	1.9059e-06	0.179
P05091;S4R3S4;H0YKL3	P05091	Aldehyde dehydrogenase, mitochondrial	ALDH2	-3.04	1.9542e-06	0.181
Q8IVS8;A0A0C4DGA0;C9JA32;C9J3N5	Q8IVS8	Glycerate kinase	GLYCTK	-5.46	1.96769e-06	0.181
O75170	O75170	Serine/threonine-protein phosphatase 6 regulatory subunit 2	PPP6R2	-3.57	1.99891e-06	0.182
Q8N0X4;Q5JVC2;Q5JVC1;REV__J3QL73	Q8N0X4	Citrate lyase subunit beta-like protein, mitochondrial	CLYBL	-2.73	2.03668e-06	0.184
A0A0C4DFN3;Q99685;A0A3B3ITT3;H7C4E0;H7C5K5;C9JAM4	A0A0C4DFN3;Q99685;A0A3B3ITT3;H7C4E0	Monoglyceride lipase	MGLL	-3.68	2.06802e-06	0.184
Q9H400;A0A087WUJ1;X6RKG5;A0A087WT57;V9GYV3	Q9H400;A0A087WUJ1	Lck-interacting transmembrane adapter 1	LIME1	-4.82	2.0808e-06	0.185
Q3LXA3;H0YCY6;I3L252;E9PJG8;E9PQR1	Q3LXA3;H0YCY6	Bifunctional ATP-dependent dihydroxyacetone kinase/FAD-AMP lyase (cyclizing);ATP-dependent dihydroxyacetone kinase;FAD-AMP lyase (cyclizing)	DAK;TKFC	-3.49	2.14192e-06	0.187
O75506;A0A8I5KTJ3;A0A8I5KYC9	O75506;A0A8I5KTJ3;A0A8I5KYC9	Heat shock factor-binding protein 1	HSBP1	-5.69	2.25419e-06	0.19
O75970;F5H1U9	O75970;F5H1U9	Multiple PDZ domain protein	MPDZ	-4.6	2.28967e-06	0.191
Q86SX6	Q86SX6	Glutaredoxin-related protein 5, mitochondrial	GLRX5	-4.63	2.29312e-06	0.191
Q9NRP4;F8W9V1	Q9NRP4	Succinate dehydrogenase assembly factor 3, mitochondrial	SDHAF3	-3.97	2.35893e-06	0.193
P63208;E5RJR5;E7ERH2;F8W8N3;E5RGM3;E5RHM3;E5RGM4	P63208;E5RJR5;E7ERH2;F8W8N3;E5RGM3	S-phase kinase-associated protein 1	SKP1	-3.7	2.38821e-06	0.194
A0A182DWF2;A0A182DWF3;Q9NNW7;D3YTF8;A0A096LPK7;A0A096LPD9;E7EWK1;A0A0U1RQX0;A0A096LPH4;A0A096LNY7;A0A096LPB7;A0A096LP96	A0A182DWF2;A0A182DWF3;Q9NNW7;D3YTF8;A0A096LPK7;A0A096LPD9;E7EWK1	Thioredoxin reductase 2, mitochondrial	TXNRD2	-3.63	2.39857e-06	0.194
P52943;H0YFA4;H0YHD8	P52943;H0YFA4	Cysteine-rich protein 2	CRIP2	-5.23	2.40081e-06	0.194
Q93099;C9JTX9;H7C576;H7C5G7;H7C4R8	Q93099	Homogentisate 1,2-dioxygenase	HGD	-4.31	2.40086e-06	0.194
Q658P3;B8ZZX6	Q658P3;B8ZZX6	Metalloreductase STEAP3	STEAP3	-3.9	2.41226e-06	0.194
Q9NX55;J3QT56	Q9NX55	Huntingtin-interacting protein K	HYPK	-5.07	2.46106e-06	0.195
O75795	O75795	UDP-glucuronosyltransferase 2B17	UGT2B17	-5.87	2.47131e-06	0.196
F5H5P2;P12694;F5GXU9;H0YH31	F5H5P2;P12694;F5GXU9	2-oxoisovalerate dehydrogenase subunit alpha, mitochondrial	BCKDHA	-3.6	2.50672e-06	0.197
P30039;A0A0C4DFS0;V9GY00	P30039;A0A0C4DFS0	Phenazine biosynthesis-like domain-containing protein	PBLD	-4.22	2.51941e-06	0.197
P48728;A0A1B0GTM2;A0A1B0GTA8;A0A1B0GWC4;A0A1B0GTV8;A0A1B0GUU7;A0A1B0GU55	P48728;A0A1B0GTM2;A0A1B0GTA8;A0A1B0GWC4;A0A1B0GTV8	Aminomethyltransferase, mitochondrial	AMT	-4.56	2.52787e-06	0.197
Q9BY49;B4DJS2	Q9BY49;B4DJS2	Peroxisomal trans-2-enoyl-CoA reductase	PECR	-4.13	2.57257e-06	0.198
P31937;H7BZL2	P31937	3-hydroxyisobutyrate dehydrogenase, mitochondrial	HIBADH	-2.97	2.57762e-06	0.198
H3BS66;A0A2R8Y7R4;B2RUZ4	H3BS66;A0A2R8Y7R4;B2RUZ4	Small integral membrane protein 1	SMIM1	-5.23	2.66941e-06	0.2
P26885;A0A494C1N0;F5H0N4	P26885;A0A494C1N0;F5H0N4	Peptidyl-prolyl cis-trans isomerase FKBP2;Peptidyl-prolyl cis-trans isomerase	FKBP2	-3.64	2.67844e-06	0.201
P08263	P08263	Glutathione S-transferase A1;Glutathione S-transferase A1, N-terminally processed	GSTA1	-5.05	2.68651e-06	0.201
Q9UJM8	Q9UJM8	Hydroxyacid oxidase 1	HAO1	-3.29	2.69455e-06	0.201
Q8N142;G3V5D8;G3V232;G3V2N1	Q8N142	Adenylosuccinate synthetase isozyme 1	ADSSL1	-3.97	2.69848e-06	0.201
P21397;A0A8I5KUC3	P21397;A0A8I5KUC3	Amine oxidase [flavin-containing] A	MAOA	-3.97	2.73845e-06	0.202
P35858	P35858	Insulin-like growth factor-binding protein complex acid labile subunit	IGFALS	-5.4	2.75271e-06	0.202
Q9BWD1;REV__H0Y3B8;REV__A0A8I5KPP5;REV__H3BLX7;REV__Q13635	Q9BWD1	Acetyl-CoA acetyltransferase, cytosolic	ACAT2	-3.73	2.78629e-06	0.203
Q7Z2X4	Q7Z2X4	PTB-containing, cubilin and LRP1-interacting protein	PID1	-4.51	2.79405e-06	0.203
O14841;A0A087WY99	O14841	5-oxoprolinase	OPLAH	-3.08	2.80386e-06	0.203
Q96N76	Q96N76	Urocanate hydratase	UROC1	-5.02	2.85163e-06	0.204
P21291;E9PS42;E9PND2;E9PP21;A0A087X134	P21291;E9PS42;E9PND2;E9PP21	Cysteine and glycine-rich protein 1	CSRP1	-4.61	2.89018e-06	0.205
Q6NVY1;B8ZZZ0;F8W8A6;H7C1A5;H7C126;H7C400;H7BYI7	Q6NVY1	3-hydroxyisobutyryl-CoA hydrolase, mitochondrial	HIBCH	-4.14	2.89909e-06	0.205
Q16762;B1AH48	Q16762	Thiosulfate sulfurtransferase	TST	-3.17	3.03357e-06	0.208
P07327	P07327	Alcohol dehydrogenase 1A	ADH1A	-4.58	3.0689e-06	0.209
B0YIW2;P02656	B0YIW2;P02656	Apolipoprotein C-III	APOC3	-5.55	3.08373e-06	0.209
Q15185;A0A087WYT3;B4DDC6	Q15185;A0A087WYT3;B4DDC6	Prostaglandin E synthase 3	PTGES3	-3.23	3.10682e-06	0.209
V9GYM3;P02652;V9GYG9;V9GYC1;V9GYS1	V9GYM3;P02652;V9GYG9;V9GYC1;V9GYS1	Apolipoprotein A-II;Proapolipoprotein A-II;Truncated apolipoprotein A-II	APOA2	-5.63	3.11574e-06	0.21
O60220;A0A2R8YDA8	O60220	Mitochondrial import inner membrane translocase subunit Tim8 A	TIMM8A	-7.45	3.11775e-06	0.21
P53370;E9PBZ9;H0Y9C0	P53370	Nucleoside diphosphate-linked moiety X motif 6	NUDT6	-4.27	3.13221e-06	0.21
V9HW50;P00325	V9HW50;P00325	Alcohol dehydrogenase 1B	HEL-S-117;ADH1B	-4.02	3.14836e-06	0.21
Q16775;H3BPK3;H3BV79	Q16775;H3BPK3	Hydroxyacylglutathione hydrolase, mitochondrial	HAGH	-3.75	3.15355e-06	0.21
P06276;F8WF14;F8WEX7;H0Y885;H7C4Y0	P06276;F8WF14;F8WEX7	Cholinesterase;Carboxylic ester hydrolase	BCHE	-4.39	3.17405e-06	0.211
P03950	P03950	Angiogenin	ANG	-4.47	3.21306e-06	0.211
P20132;F8VW93	P20132	L-serine dehydratase/L-threonine deaminase	SDS	-6.08	3.22876e-06	0.212
Q9UDX5;B5MC22;F8WEN7	Q9UDX5;B5MC22	Mitochondrial fission process protein 1	MTFP1	-4.7	3.35591e-06	0.215
Q15493	Q15493	Regucalcin	RGN	-5.48	3.36742e-06	0.215
O76054;B3KRD8;C9JZI9;H7C4C6;F8WEE7;C9JTM4;C9JYY7;F8WED8	O76054;B3KRD8	SEC14-like protein 2	SEC14L2	-3.68	3.37659e-06	0.216
E9PHV5;P28290;E7EUL7;H7BZ26	E9PHV5;P28290;E7EUL7	Sperm-specific antigen 2	SSFA2	-4	3.47084e-06	0.218
P09110;C9JDE9;H7C131;H0Y4D4;B4DVF4;F2Z2Q6;F2Z3P7	P09110;C9JDE9;H7C131;H0Y4D4	3-ketoacyl-CoA thiolase, peroxisomal	ACAA1	-4.76	3.58199e-06	0.22
Q9UJC3;A0A8I5KRQ9;A0A8I5KQJ5;B1AK95	Q9UJC3;A0A8I5KRQ9;A0A8I5KQJ5	Protein Hook homolog 1	HOOK1	-4.19	3.61755e-06	0.221
Q9UBX1;A0A024R5G9;A0A7I2V411;H0YD65;A0A7I2V5Q1;A0A7I2V4A8;A0A7I2V5B9;A0A7I2V2K3;A0A7I2V3M3;A0A7I2V3X1;A0A7I2YQH8;A0A7I2V313;A0A7I2V5F8;A0A7I2V3E7;A0A7I2V3L9;A0A7I2YQW3;A0A7I2YQB3;H0YE42;A0A7I2V3V9	Q9UBX1;A0A024R5G9;A0A7I2V411;H0YD65;A0A7I2V5Q1;A0A7I2V4A8;A0A7I2V5B9;A0A7I2V2K3;A0A7I2V3M3;A0A7I2V3X1;A0A7I2YQH8;A0A7I2V313	Cathepsin F	CTSF	-5.28	3.65899e-06	0.222
Q96RQ3;E9PHF7;E9PG35;G5E9X5;F8WDI3	Q96RQ3;E9PHF7;E9PG35;G5E9X5	Methylcrotonoyl-CoA carboxylase subunit alpha, mitochondrial	MCCC1	-3.03	3.71703e-06	0.224
Q96NA2;I3L1U0;A0A0J9YWQ1	Q96NA2;I3L1U0;A0A0J9YWQ1	Rab-interacting lysosomal protein	RILP	-5.14	3.81171e-06	0.226
P46952;C9IY88	P46952;C9IY88	3-hydroxyanthranilate 3,4-dioxygenase	HAAO	-4.91	3.81482e-06	0.226
P00326;A0A087WU81;A0A087WUC4	P00326;A0A087WU81	Alcohol dehydrogenase 1C	ADH1C	-7.2	3.9468e-06	0.229
Q02952	Q02952	A-kinase anchor protein 12	AKAP12	-4.33	3.95322e-06	0.229
Q6UUV9;M0QX46;M0QXN6	Q6UUV9;M0QX46;M0QXN6	CREB-regulated transcription coactivator 1	CRTC1	-4.59	3.97165e-06	0.229
P05114;A6NL93;A6NEL0;F2Z2W6;F2Z2Y5;H7BXJ5;A0A494C035	P05114;A6NL93;A6NEL0	Non-histone chromosomal protein HMG-14	HMGN1	-8.52	4.03488e-06	0.231
A0A0C4DGA2;O75521;F1LLU7;F8WAW4;F8W6J1	A0A0C4DGA2;O75521;F1LLU7	Enoyl-CoA delta isomerase 2, mitochondrial	ECI2	-3.54	4.05418e-06	0.231
Q6IPR1;G3V521	Q6IPR1	LYR motif-containing protein 5	LYRM5	-4.08	4.07166e-06	0.231
Q58FF8	Q58FF8	Putative heat shock protein HSP 90-beta 2	HSP90AB2P	-4.01	4.0851e-06	0.232
Q9HD40;A0A7P0TA23;A0A7P0Z4P3;H0Y9D2;J3KP25	Q9HD40;A0A7P0TA23;A0A7P0Z4P3	O-phosphoseryl-tRNA(Sec) selenium transferase	SEPSECS	-4.35	4.12903e-06	0.232
Q96DG6	Q96DG6	Carboxymethylenebutenolidase homolog	CMBL	-4.95	4.18396e-06	0.234
O60656;Q9HAW9;Q9HAW8	O60656;Q9HAW9;Q9HAW8	UDP-glucuronosyltransferase 1-9;UDP-glucuronosyltransferase 1-8;UDP-glucuronosyltransferase 1-10	UGT1A9;UGT1A8;UGT1A10	-5.35	4.26305e-06	0.235
Q9BVL4	Q9BVL4	Selenoprotein O	SELO	-3.16	4.67915e-06	0.245
Q16134;B4DEQ0;A0A804HL84;A0A804HL81;A0A804HJK8;A0A804HK05;A0A804HJT7;A0A804HI48;A0A804HI73;A0A804HK66;A0A804HKB8;A0A804HK08	Q16134;B4DEQ0;A0A804HL84;A0A804HL81;A0A804HJK8;A0A804HK05;A0A804HJT7;A0A804HI48;A0A804HI73	Electron transfer flavoprotein-ubiquinone oxidoreductase, mitochondrial	ETFDH	-3.31	4.77814e-06	0.247
Q8IWE2;D6R9C9	Q8IWE2	Protein NOXP20	FAM114A1	-3.83	4.8286e-06	0.248
Q96EK6;G3V4W4;G3V5E4	Q96EK6;G3V4W4;G3V5E4	Glucosamine 6-phosphate N-acetyltransferase	GNPNAT1	-4.89	4.83743e-06	0.248
P49326;E9PJF3;E9PP51;E9PQ84	P49326;E9PJF3	Dimethylaniline monooxygenase [N-oxide-forming] 5	FMO5	-4.5	4.95168e-06	0.25
P55157;D6R915	P55157	Microsomal triglyceride transfer protein large subunit	MTTP	-2.9	5.16624e-06	0.255
P48061	P48061	Stromal cell-derived factor 1;SDF-1-beta(3-72);SDF-1-alpha(3-67)	CXCL12	-4.7	5.17251e-06	0.255
P49448	P49448	Glutamate dehydrogenase 2, mitochondrial	GLUD2	-3.31	5.20852e-06	0.255
Q9NQ94;F8W9F8;Q5T0W7	Q9NQ94;F8W9F8;Q5T0W7	APOBEC1 complementation factor	A1CF	-3.44	5.27221e-06	0.257
Q96LJ7;H0YNC2	Q96LJ7	Dehydrogenase/reductase SDR family member 1	DHRS1	-3.8	5.34896e-06	0.258
Q9BPW8;C9JDV8	Q9BPW8	Protein NipSnap homolog 1	NIPSNAP1	-2.63	5.384e-06	0.259
Q96AB3;K7EKW4;K7ENV7	Q96AB3;K7EKW4;K7ENV7	Isochorismatase domain-containing protein 2, mitochondrial	ISOC2	-5.44	5.45977e-06	0.26
P35914;H0Y2L7;G5E9S9;B7Z4D4;B7Z212;Q8TB92	P35914	Hydroxymethylglutaryl-CoA lyase, mitochondrial	HMGCL	-3.04	5.57989e-06	0.262
Q9BRG1;K7EKV4;K7EP45	Q9BRG1;K7EKV4	Vacuolar protein-sorting-associated protein 25	VPS25	-4.61	5.84844e-06	0.267
P78329;A0A0A0MQR0;V9GYA1;K7EK90;K7EQI8	P78329;A0A0A0MQR0	Phylloquinone omega-hydroxylase CYP4F2	CYP4F2	-7.04	5.87025e-06	0.267
P30154;H0YDG7;E9PPI5;E9PHZ6;E9PNM7	P30154;H0YDG7	Serine/threonine-protein phosphatase 2A 65 kDa regulatory subunit A beta isoform	PPP2R1B	-4.04	6.13904e-06	0.272
Q14061;H7C4E5;C9J8T6	Q14061;H7C4E5;C9J8T6	Cytochrome c oxidase copper chaperone	COX17	-3.86	6.24765e-06	0.274
Q9NYL5;A0A087WTD2	Q9NYL5;A0A087WTD2	24-hydroxycholesterol 7-alpha-hydroxylase	CYP39A1	-4.75	6.53241e-06	0.278
P07108;B8ZWD1	P07108;B8ZWD1	Acyl-CoA-binding protein	DBI	-6.82	6.97245e-06	0.285
P03951;X6R3B1;D6RB32;H0Y596	P03951	Coagulation factor XI;Coagulation factor XIa heavy chain;Coagulation factor XIa light chain	F11	-4.27	7.09282e-06	0.286
P07307;Q7Z4G9;I3L1H2	P07307;Q7Z4G9	Asialoglycoprotein receptor 2	ASGR2;HBXBP	-5.43	7.24533e-06	0.289
Q86YB7;F6RJU0;F5GWU3	Q86YB7;F6RJU0;F5GWU3	Enoyl-CoA hydratase domain-containing protein 2, mitochondrial	ECHDC2	-5.78	7.30041e-06	0.289
A0A8I5KRR9;A0A804HJQ7;A0A804HI25;Q9UBM7;E9PM00;A0A804HJI8;A0A804HL56;E9PJ54;B4E1K5;E9PRL8;E9PQ71;E9PIP9;H0YE57;E9PLZ2	A0A8I5KRR9;A0A804HJQ7;A0A804HI25;Q9UBM7;E9PM00;A0A804HJI8;A0A804HL56;E9PJ54;B4E1K5	7-dehydrocholesterol reductase	DHCR7	-4.88	7.30494e-06	0.289
P00367;A0A804HJD7;A0A804HKE0;A0A804HJZ0;A0A804HHS2;A0A804HHU3;A0A804HLC0;A0A804HIA0;REV__E7EV89;A6NF36	P00367;A0A804HJD7;A0A804HKE0	Glutamate dehydrogenase 1, mitochondrial	GLUD1	-3.15	7.32337e-06	0.29
Q99569;E7EST6;H0YFB1;E7EMY7;E9PHB5;Q9UQB3;B4DRK2;E7EPC8;E9PHJ1;E7EP40;D6RBA8;D6RC65;D6RHE9	Q99569	Plakophilin-4	PKP4	-3.57	7.35133e-06	0.29
Q99611	Q99611	Selenide, water dikinase 2	SEPHS2	-3.94	7.38372e-06	0.29
Q53LP3	Q53LP3	Ankyrin repeat domain-containing protein SOWAHC	SOWAHC	-5.32	7.47074e-06	0.292
P49914;A0A0A6YYL1;A0A0U1RQM3;A0A0U1RR23;H3BMB9;H3BN04	P49914;A0A0A6YYL1;A0A0U1RQM3	5-formyltetrahydrofolate cyclo-ligase	MTHFS;ST20-MTHFS	-3.32	7.49102e-06	0.292
A0A096LPC5;Q9Y4E1;J3KP36;A0A0A0MT65	A0A096LPC5;Q9Y4E1;J3KP36	WASH complex subunit FAM21C	FAM21C	-4.9	7.61637e-06	0.294
P49888;H0Y8G0	P49888	Estrogen sulfotransferase	SULT1E1	-7.05	7.64336e-06	0.294
Q14241	Q14241	Transcription elongation factor B polypeptide 3	TCEB3	-3.9	7.6879e-06	0.294
Q9Y2S2;A0A2R8Y4K2;A0A2R8YCZ4;A0A2R8YFQ7;A0A087WW38;A0A2R8Y7B4;A0A2R8Y5S5	Q9Y2S2;A0A2R8Y4K2;A0A2R8YCZ4;A0A2R8YFQ7	Lambda-crystallin homolog	CRYL1	-3.19	7.80676e-06	0.296
P07099;B1AQP8	P07099	Epoxide hydrolase 1	EPHX1	-3.45	7.83643e-06	0.296
O60669;F8W0N3;F8VS95	O60669;F8W0N3	Monocarboxylate transporter 2	SLC16A7	-4.97	7.8694e-06	0.297
P05981;M0QZ63;M0R244;A6NIE9	P05981	Serine protease hepsin;Serine protease hepsin non-catalytic chain;Serine protease hepsin catalytic chain	HPN	-3.48	8.04901e-06	0.299
C9JI79;C9IZT7;C9JBB0;C9JDX2;C9JZ60;C9J372;C9J4Z9;C9JN77;C9JWC3;C9JM25;C9JEA9;C9J620;C9JFS9;C9JC90;C9J9D3;C9JG84	C9JI79;C9IZT7;C9JBB0;C9JDX2;C9JZ60;C9J372;C9J4Z9;C9JN77;C9JWC3;C9JM25;C9JEA9;C9J620;C9JFS9;C9JC90		SORBS2	-7.08	8.27483e-06	0.302
P14854;A0A494C160;K7EQD3	P14854	Cytochrome c oxidase subunit 6B1	COX6B1	-3.79	8.44182e-06	0.304
P04004;F5GX75	P04004	Vitronectin;Vitronectin V65 subunit;Vitronectin V10 subunit;Somatomedin-B	VTN	-2.81	8.5929e-06	0.306
P04424;A0A5F9ZHM8;A0A5F9ZHC6	P04424;A0A5F9ZHM8	Argininosuccinate lyase	ASL	-2.92	8.7993e-06	0.308
Q6UWW8	Q6UWW8	Carboxylesterase 3	CES3	-5.07	8.87076e-06	0.309
B4DDD6;F8WC20;F8WBB2;F8WFE1;F2Z2V3;F8WB73;F8WCK3;F2Z3E3;H7C111	B4DDD6		DBNL	-5.06	9.0794e-06	0.311
P0DPI2;A0A0B4J2D5;F2Z2Q0;A0A096LP12;A0A2R8Y6K9;A0A096LNJ1;A0A2R8Y588;A0A096LP57	P0DPI2;A0A0B4J2D5			-3.19	9.26566e-06	0.313
Q5HYK3;B4DP72;F8VVX6;F8VVW7;F8VP53	Q5HYK3;B4DP72;F8VVX6	2-methoxy-6-polyprenyl-1,4-benzoquinol methylase, mitochondrial	COQ5	-4.03	9.35061e-06	0.314
Q14376;Q5QPP1;Q5QPP9	Q14376;Q5QPP1	UDP-glucose 4-epimerase	GALE	-3.1	9.41588e-06	0.315
P17735	P17735	Tyrosine aminotransferase	TAT	-4.65	9.49656e-06	0.316
S4R3E2;Q9UKB3;S4R368;S4R3W0	S4R3E2;Q9UKB3	DnaJ homolog subfamily C member 12	DNAJC12	-4.59	9.65108e-06	0.317
Q6YN16	Q6YN16	Hydroxysteroid dehydrogenase-like protein 2	HSDL2	-2.63	9.70735e-06	0.318
P36871;A0A3B3ITK7	P36871;A0A3B3ITK7	Phosphoglucomutase-1	PGM1	-2.67	9.73088e-06	0.318
Q86X29;S4R3V8;M0R1W9	Q86X29;S4R3V8	Lipolysis-stimulated lipoprotein receptor	LSR	-3.86	9.82789e-06	0.319
Q9Y2V2;H3BUY4;H3BPY5;H3BNU9;H3BSW7;H3BTK3;I3L3X8	Q9Y2V2;H3BUY4;H3BPY5;H3BNU9;H3BSW7;H3BTK3;I3L3X8	Calcium-regulated heat stable protein 1	CARHSP1	-3.54	9.84028e-06	0.319
Q969I3;A0A8I5KVG3;E9PP99;E9PR27;E9PJV1	Q969I3;A0A8I5KVG3;E9PP99	Glycine N-acyltransferase-like protein 1	GLYATL1	-5.76	9.92905e-06	0.32
Q14353;A0A1W2PR36;K7EM34	Q14353;A0A1W2PR36	Guanidinoacetate N-methyltransferase	GAMT	-4.3	1.00029e-05	0.321
P62760;E7ER47;E9PE24;Q9UM19	P62760;E7ER47	Visinin-like protein 1	VSNL1	-5.96	1.0174e-05	0.322
Q9UBQ7;U3KQ56	Q9UBQ7;U3KQ56	Glyoxylate reductase/hydroxypyruvate reductase	GRHPR	-3.31	1.0338e-05	0.324
P22830;A0A499FJN5;K7ELX4;K7EJX5;K7EJM8	P22830;A0A499FJN5;K7ELX4	Ferrochelatase, mitochondrial	FECH	-2.78	1.03528e-05	0.324
Q96CM8;E9PF16;D6RF87;H0Y8N1	Q96CM8;E9PF16	Acyl-CoA synthetase family member 2, mitochondrial	ACSF2	-3.01	1.05428e-05	0.326
Q5TDH0;H0YII4;H0YI90;Q8WTU0	Q5TDH0	Protein DDI1 homolog 2	DDI2	-5.36	1.08536e-05	0.329
Q8NC51	Q8NC51	Plasminogen activator inhibitor 1 RNA-binding protein	SERBP1	-4.41	1.09303e-05	0.329
Q9UJ68;E5RIA9;H0YAN3;E5RJK1;E9PJ70	Q9UJ68;E5RIA9	Mitochondrial peptide methionine sulfoxide reductase	MSRA	-3.89	1.10991e-05	0.331
O95671	O95671	N-acetylserotonin O-methyltransferase-like protein	ASMTL	-3.5	1.14225e-05	0.334
Q13541	Q13541	Eukaryotic translation initiation factor 4E-binding protein 1	EIF4EBP1	-5.25	1.14921e-05	0.334
Q15847	Q15847	Adipogenesis regulatory factor	ADIRF	-8.28	1.1986e-05	0.338
Q99714;A0A804HHW5;Q5H928	Q99714;A0A804HHW5;Q5H928	3-hydroxyacyl-CoA dehydrogenase type-2	HSD17B10	-2.9	1.20304e-05	0.339
P30084	P30084	Enoyl-CoA hydratase, mitochondrial	ECHS1	-3.81	1.23605e-05	0.341
P29966	P29966	Myristoylated alanine-rich C-kinase substrate	MARCKS	-4.08	1.28141e-05	0.345
sp|A024245|abysis_24245	sp|A024245|abysis_24245			-3.81	1.30144e-05	0.346
O14561;H3BNK3	O14561	Acyl carrier protein, mitochondrial	NDUFAB1	-5.39	1.32787e-05	0.348
C9JQD1;A0A5F9ZGW4;P35557;A0A5F9ZHE0;A0A8C8PZE6;H7BXV0	C9JQD1;A0A5F9ZGW4;P35557;A0A5F9ZHE0;A0A8C8PZE6	Hexokinase;Glucokinase	GCK	-4.42	1.32918e-05	0.348
Q969I6;F8VRD9;F8VQY9	Q969I6	Sodium-coupled neutral amino acid transporter 4	SLC38A4	-6.84	1.33104e-05	0.348
P55103	P55103	Inhibin beta C chain	INHBC	-2.62	1.33358e-05	0.349
P55263;A0A5K1VW54;A0A5F9ZH31;A0A5F9ZHJ1;A0A5F9ZGZ8;A0A5F9ZH76	P55263;A0A5K1VW54;A0A5F9ZH31;A0A5F9ZHJ1	Adenosine kinase	ADK	-3.16	1.3347e-05	0.349
Q71RC2;X6RLN4;Q96J85;F8VY40;F8W1I4;F8W1Z5;F8VNV1	Q71RC2;X6RLN4	La-related protein 4	LARP4	-3.27	1.34072e-05	0.349
P16219;E9PE82	P16219;E9PE82	Short-chain specific acyl-CoA dehydrogenase, mitochondrial	ACADS	-3.15	1.35022e-05	0.35
Q14966;A0A096LNS4;A0A096LPK8;C9JWN0;A0A096LPI0;A0A096LPB4;A0A096LNR2;A0A096LNX0;A0A096LNQ0	Q14966	Zinc finger protein 638	ZNF638	-2.89	1.35332e-05	0.35
A0A7I2V347;A0A7I2V560;Q5T8D3;A0A7I2YQJ9;A0A7I2V556;A0A7I2V5L4;X6RDD7;Q5T8E0;A0A7I2V462	A0A7I2V347;A0A7I2V560;Q5T8D3;A0A7I2YQJ9;A0A7I2V556;A0A7I2V5L4;X6RDD7;Q5T8E0;A0A7I2V462	Acyl-CoA-binding domain-containing protein 5	ACBD5	-3.3	1.36176e-05	0.351
Q9HAC7;H0Y4N1	Q9HAC7;H0Y4N1	Succinate--hydroxymethylglutarate CoA-transferase	SUGCT	-5.31	1.38692e-05	0.352
Q9HCE6;Q5VXI4;A0A384DVK7	Q9HCE6;Q5VXI4	Rho guanine nucleotide exchange factor 10-like protein	ARHGEF10L	-3.01	1.3956e-05	0.353
O94875;H7BZK1	O94875;H7BZK1	Sorbin and SH3 domain-containing protein 2	SORBS2	-3.32	1.40227e-05	0.353
K7ERI9;P02654	K7ERI9;P02654	Apolipoprotein C-I;Truncated apolipoprotein C-I	APOC1	-4.01	1.4044e-05	0.354
A0A087X165;Q9C0H9;A0A087WVV7;A0A590UJ70;A0A087WU33	A0A087X165;Q9C0H9;A0A087WVV7;A0A590UJ70	SRC kinase signaling inhibitor 1	SRCIN1	-3.71	1.41475e-05	0.354
Q96I99;E9PDQ8;H0Y852	Q96I99;E9PDQ8	Succinyl-CoA ligase [GDP-forming] subunit beta, mitochondrial	SUCLG2	-2.5	1.49517e-05	0.359
P31040;D6RFM5;A0A494C1T6;H0Y8X1;H0Y8S2	P31040;D6RFM5	Succinate dehydrogenase [ubiquinone] flavoprotein subunit, mitochondrial	SDHA	-3.24	1.50502e-05	0.36
Q8N4T8;H0Y962;D6RAV8;D6RJF4;D6RGF2	Q8N4T8;H0Y962	Carbonyl reductase family member 4	CBR4	-2.55	1.50668e-05	0.36
Q14914;F2Z3J9;Q5JVP2;F6XGT7	Q14914;F2Z3J9	Prostaglandin reductase 1	PTGR1	-3.66	1.54097e-05	0.362
P20674;H3BRM5;H3BV69;H3BNX8;H3BRI0	P20674;H3BRM5;H3BV69;H3BNX8	Cytochrome c oxidase subunit 5A, mitochondrial	COX5A	-3.49	1.54286e-05	0.362
A0A804HJ24;Q9HCC0;A0A804HJ84;A0A804HLJ9;A0A804HK37;A0A804HKE8;A0A804HJL2;A0A804HJC1;A0A804HKH3	A0A804HJ24;Q9HCC0;A0A804HJ84;A0A804HLJ9;A0A804HK37;A0A804HKE8;A0A804HJL2;A0A804HJC1	Methylcrotonoyl-CoA carboxylase beta chain, mitochondrial	MCCC2	-2.96	1.54333e-05	0.362
P30837;A0A0U1RQK9	P30837	Aldehyde dehydrogenase X, mitochondrial	ALDH1B1	-3.35	1.54704e-05	0.363
P22059;H0YCV6;H7C1R2	P22059	Oxysterol-binding protein 1	OSBP	-2.41	1.56579e-05	0.364
Q8TF65	Q8TF65	PDZ domain-containing protein GIPC2	GIPC2	-3.18	1.56871e-05	0.364
P49773;D6REP8;D6RE99;H0YC49;D6RD60;A0A6Q8PGQ8;D6RC06	P49773	Histidine triad nucleotide-binding protein 1	HINT1	-2.95	1.59226e-05	0.365
Q9C0C2;E9PKK0;E9PKE7	Q9C0C2	182 kDa tankyrase-1-binding protein	TNKS1BP1	-5.8	1.62905e-05	0.367
O95182;M0R0N0;M0R1K9	O95182;M0R0N0	NADH dehydrogenase [ubiquinone] 1 alpha subcomplex subunit 7	NDUFA7	-3.1	1.63514e-05	0.368
Q9NUQ6;B8ZZZ7;F8VT91;C9JKE4;F2Z2S1;C9J8M7;C9IZC3;Q4ZFW0;F8WAV0	Q9NUQ6;B8ZZZ7	SPATS2-like protein	SPATS2L	-3.38	1.65947e-05	0.369
Q9H9P8	Q9H9P8	L-2-hydroxyglutarate dehydrogenase, mitochondrial	L2HGDH	-3.42	1.65997e-05	0.369
O00763;S4R3S7	O00763	Acetyl-CoA carboxylase 2;Biotin carboxylase	ACACB	-4.13	1.73423e-05	0.373
P24752;A0A5F9ZHL1;A0A5F9ZHJ7;A0A5F9ZI66;A0A5F9ZHH9;H0YEL7;A0A5F9ZHL7;E9PRQ6	P24752;A0A5F9ZHL1;A0A5F9ZHJ7;A0A5F9ZI66	Acetyl-CoA acetyltransferase, mitochondrial	ACAT1	-2.68	1.75679e-05	0.375
Q9Y694;X6RDF7;Q5T051	Q9Y694	Solute carrier family 22 member 7	SLC22A7	-3.95	1.81725e-05	0.378
P12074	P12074	Cytochrome c oxidase subunit 6A1, mitochondrial	COX6A1	-6.1	1.82345e-05	0.378
P17516	P17516	Aldo-keto reductase family 1 member C4	AKR1C4	-3.79	1.83139e-05	0.379
P18669	P18669	Phosphoglycerate mutase 1	PGAM1	-2.59	1.83907e-05	0.379
P07919;A0A087X2B9;A0A087WTF2	P07919	Cytochrome b-c1 complex subunit 6, mitochondrial	UQCRH	-5.94	1.86876e-05	0.381
F5GYJ5;Q9NX18;F8W679;M0QYN2;F5GXW4;M0R060;F5H5T6;F5H8E2	F5GYJ5;Q9NX18;F8W679;M0QYN2;F5GXW4;M0R060;F5H5T6	Succinate dehydrogenase assembly factor 2, mitochondrial	SDHAF2	-4.73	1.93562e-05	0.384
Q14247;H0YCD9;H0YEV2	Q14247	Src substrate cortactin	CTTN	-3.74	2.02104e-05	0.389
Q9P1Y5	Q9P1Y5	Calmodulin-regulated spectrin-associated protein 3	CAMSAP3	-3.11	2.0449e-05	0.39
Q92947;K7EKT3;K7EQ99;K7ESA6;K7ES74;K7EKH1;K7ERX1	Q92947	Glutaryl-CoA dehydrogenase, mitochondrial	GCDH	-2.78	2.15658e-05	0.395
O95831;A0A6Q8PG15;A0A6Q8PFM5;A0A7I2PK44;A0A6Q8PFE1;A0A6Q8PHJ9;A0A6Q8PHC0;A0A6Q8PFQ8;A0A6Q8PFS4;A0A6Q8PFA7;A0A7I2RLJ8;A0A6Q8PFW2;E9PMA0;A0A6Q8PHJ4;A0A6Q8PFN1	O95831;A0A6Q8PG15;A0A6Q8PFM5;A0A7I2PK44;A0A6Q8PFE1;A0A6Q8PHJ9;A0A6Q8PHC0;A0A6Q8PFQ8;A0A6Q8PFS4;A0A6Q8PFA7;A0A7I2RLJ8;A0A6Q8PFW2	Apoptosis-inducing factor 1, mitochondrial	AIFM1	-2.27	2.16119e-05	0.396
P21912;A0A087WWT1	P21912;A0A087WWT1	Succinate dehydrogenase [ubiquinone] iron-sulfur subunit, mitochondrial	SDHB	-2.93	2.16428e-05	0.396
P41236;Q6NXS1	P41236;Q6NXS1	Protein phosphatase inhibitor 2;Protein phosphatase inhibitor 2-like protein 3	PPP1R2;PPP1R2P3	-5.11	2.20218e-05	0.398
P10109	P10109	Adrenodoxin, mitochondrial	FDX1	-3.77	2.20584e-05	0.398
E5RIW3;E5RJD8;O75347;E5RHG6;E5RIX8;A0A494C144	E5RIW3;E5RJD8;O75347;E5RHG6;E5RIX8	Tubulin-specific chaperone A	TBCA	-3.78	2.2062e-05	0.398
P22310;B5MCT4	P22310	UDP-glucuronosyltransferase 1-4	UGT1A4	-4.57	2.21011e-05	0.398
E9PDR0;P05166;C9JQS9;E7EX59;E7ETT1;E7ETT4;E7EUY3;E9PEC3;F8WBI9;E7ENC1;H7C5C9;C9JVY9;C9JVW9;C9JAW3	E9PDR0;P05166;C9JQS9;E7EX59;E7ETT1;E7ETT4;E7EUY3;E9PEC3;F8WBI9	Propionyl-CoA carboxylase beta chain, mitochondrial	PCCB	-2.53	2.21784e-05	0.398
C9JZR2;H0YC95;O60716;E9PKL1	C9JZR2;H0YC95;O60716	Catenin delta-1	CTNND1	-3.23	2.29798e-05	0.402
Q9NP73;A0A096LNJ4;A0A087WX43;D6RE84;A0A087WTT9;A0A1B0GVW6	Q9NP73;A0A096LNJ4;A0A087WX43;D6RE84;A0A087WTT9;A0A1B0GVW6	Putative bifunctional UDP-N-acetylglucosamine transferase and deubiquitinase ALG13	ALG13	-4.21	2.33076e-05	0.403
P49908;A0A182DWH7;A0A182DWH8	P49908;A0A182DWH7	Selenoprotein P	SEPP1	-4.53	2.3535e-05	0.404
P62328	P62328	Thymosin beta-4;Hematopoietic system regulatory peptide	TMSB4X	-3.78	2.40389e-05	0.406
Q9BXR6	Q9BXR6	Complement factor H-related protein 5	CFHR5	-5.44	2.41487e-05	0.407
P25325;B1AH49;F8WB46;F8WBS0;C9JJV8;B4DKT6;Q07001	P25325;B1AH49	3-mercaptopyruvate sulfurtransferase;Sulfurtransferase	MPST	-3.64	2.42261e-05	0.407
Q9ULC5;A0A8C8L3F5;A0A8C8KCK5;A0A804HIN9	Q9ULC5;A0A8C8L3F5;A0A8C8KCK5	Long-chain-fatty-acid--CoA ligase 5	ACSL5	-2.9	2.42397e-05	0.407
O00479	O00479	High mobility group nucleosome-binding domain-containing protein 4	HMGN4	-6.88	2.4555e-05	0.408
Q86WA6;B4DML3;Q49AI2;H7C0M3;F2Z2Q1	Q86WA6;B4DML3;Q49AI2	Valacyclovir hydrolase	BPHL	-6.45	2.46219e-05	0.409
Q9UNU6;C9JFR9	Q9UNU6;C9JFR9	7-alpha-hydroxycholest-4-en-3-one 12-alpha-hydroxylase	CYP8B1	-3.9	2.50803e-05	0.41
O75191;A0A3B3IRM4;A0A3B3IS07;F8WBF6;C9J0N9	O75191;A0A3B3IRM4;A0A3B3IS07	Xylulose kinase	XYLB	-3.25	2.57439e-05	0.413
P00480;A0A2R8Y829	P00480	Ornithine carbamoyltransferase, mitochondrial	OTC	-2.73	2.60633e-05	0.414
Q86YT5;I3L4X6;I3L4S9;I3L424	Q86YT5;I3L4X6	Solute carrier family 13 member 5	SLC13A5	-5.42	2.63534e-05	0.415
Q9NX40;D6RG39;D6RIT9;D6RBN5;D6R918;D6RBC5;D6RDI5;D6RA54;D6RC55;D6RF07;D6R9T5;D6RF01	Q9NX40;D6RG39;D6RIT9;D6RBN5;D6R918;D6RBC5;D6RDI5;D6RA54;D6RC55	OCIA domain-containing protein 1	OCIAD1	-2.57	2.68354e-05	0.417
P52758;H0YB34;H0YBX3	P52758;H0YB34;H0YBX3	Ribonuclease UK114	HRSP12	-3.71	2.80644e-05	0.421
P30046;B5MC82;A6NHG4;J3KQ18;H7C342	P30046;B5MC82;A6NHG4;J3KQ18	D-dopachrome decarboxylase;D-dopachrome decarboxylase-like protein	DDT;DDTL	-3.24	2.81761e-05	0.422
F8VXG7;Q99590;A0A0A0MTP7;A0A087WTB7	F8VXG7;Q99590;A0A0A0MTP7	Protein SCAF11	SCAF11	-4.04	2.83733e-05	0.422
P62745	P62745	Rho-related GTP-binding protein RhoB	RHOB	-3.66	2.83873e-05	0.423
P07306;J3QSZ2;K7EPS5;I3L2S9;I3L129;I3L1F8	P07306;J3QSZ2;K7EPS5	Asialoglycoprotein receptor 1	ASGR1	-3.01	2.84122e-05	0.423
P30085	P30085	UMP-CMP kinase	CMPK1	-3.8	2.8893e-05	0.424
Q9NQX3;F5H039;H0YJ30;H0YJR5	Q9NQX3;F5H039	Gephyrin;Molybdopterin adenylyltransferase;Molybdopterin molybdenumtransferase	GPHN	-3.2	2.8927e-05	0.424
Q13576;F5H7S7;D6R939;E9PDT6;D6RDK8;A0A8I5KRM2;D6RGC6;D6R999;H0YA28;R4GN71;Q96L03	Q13576;F5H7S7;D6R939	Ras GTPase-activating-like protein IQGAP2	IQGAP2	-2.32	2.89678e-05	0.424
J3QL71;Q96FV2;J3QRJ1;J3QR84;J3QQM9;J3KT79;J3KS57	J3QL71;Q96FV2;J3QRJ1	Secernin-2	SCRN2	-3.13	2.91919e-05	0.425
P10635;A0A0U1RRC6;A0A0U1RQD0;A0A0G2JNM9;A0A0G2JMD2;A0A087X1C5;A0A1B0GTQ1;A0A2R9YJI8;A0A0G2JLV4;H7BY38;A0A1B0GUD8	P10635;A0A0U1RRC6;A0A0U1RQD0;A0A0G2JNM9;A0A0G2JMD2;A0A087X1C5;A0A1B0GTQ1;A0A2R9YJI8;A0A0G2JLV4	Cytochrome P450 2D6;Putative cytochrome P450 2D7	CYP2D6;CYP2D7	-6.06	2.92921e-05	0.426
Q03154;A0A1B0GW23;A0A1B0GU86;A0A1B0GV31;C9JYZ0;F8WC59;A0A1B0GTG3;A0A1B0GVZ3;A0A1B0GVG0;A0A1B0GU36	Q03154;A0A1B0GW23;A0A1B0GU86;A0A1B0GV31	Aminoacylase-1	ACY1	-2.96	2.97703e-05	0.427
Q9BQ69;A0A6Q8PH91	Q9BQ69;A0A6Q8PH91	O-acetyl-ADP-ribose deacetylase MACROD1	MACROD1	-5.46	3.01154e-05	0.428
Q8NFH8	Q8NFH8	RalBP1-associated Eps domain-containing protein 2	REPS2	-3.47	3.02118e-05	0.429
Q9UBF6	Q9UBF6	RING-box protein 2	RNF7	-4.73	3.08621e-05	0.431
Q96F10;I3L0W4;I3L2W7	Q96F10;I3L0W4	Diamine acetyltransferase 2	SAT2	-6.82	3.12899e-05	0.432
P23434;H3BNV1;A0A1W2PRH4;A0A1W2PPE4;A0A1W2PNX3;A0A1W2PPQ1;A0A1W2PS29;A0A1W2PQV2;H3BUH9	P23434;H3BNV1;A0A1W2PRH4;A0A1W2PPE4;A0A1W2PNX3;A0A1W2PPQ1;A0A1W2PS29;A0A1W2PQV2;H3BUH9	Glycine cleavage system H protein, mitochondrial	GCSH	-5.65	3.13385e-05	0.432
P78560;F8VV49;F5H7C2;F8VVY5	P78560	Death domain-containing protein CRADD	CRADD	-3.48	3.13668e-05	0.432
Q5R3I4;A9UJP8;H7C2L7;F8WBU8;H7C089	Q5R3I4;A9UJP8	Tetratricopeptide repeat protein 38	TTC38	-3.68	3.15431e-05	0.433
Q96LZ7;A0A0A0MSD2;A0A0C4DFM4;C9JGB2;H7C2J3;F8WFC3;C9JUD5	Q96LZ7;A0A0A0MSD2;A0A0C4DFM4;C9JGB2	Regulator of microtubule dynamics protein 2	RMDN2	-3.15	3.21334e-05	0.434
Q9UGP4;C9JRJ5;K7EKM1;A6NIX2	Q9UGP4;C9JRJ5	LIM domain-containing protein 1	LIMD1	-4.06	3.23659e-05	0.435
A0A8I5QKY1;P38435;A0A8I5QJ91;A0A8I5KXJ8;A0A8I5KXY4;A0A8I5QJS0;A0A8I5KT68;A0A8I5KY98;A0A8I5KXQ8;A0A8I5KZ18;A0A8I5QJA4;F8WCF0;F8WB98;A0A8I5KV68	A0A8I5QKY1;P38435;A0A8I5QJ91;A0A8I5KXJ8;A0A8I5KXY4;A0A8I5QJS0	Vitamin K-dependent gamma-carboxylase	GGCX	-3.47	3.25204e-05	0.435
Q9H227	Q9H227	Cytosolic beta-glucosidase	GBA3	-5.89	3.26821e-05	0.436
P51589;A0A3B3IT99;A0A3B3IU95;A0A3B3ITF2	P51589;A0A3B3IT99;A0A3B3IU95	Cytochrome P450 2J2	CYP2J2	-4.5	3.26953e-05	0.436
Q96HR9;A8MXN1	Q96HR9;A8MXN1	Receptor expression-enhancing protein 6;Receptor expression-enhancing protein	REEP6	-3.67	3.30997e-05	0.437
Q8TD22;B8ZZJ6;C9JIV5;H7C1S9;F8WBH6	Q8TD22;B8ZZJ6;C9JIV5;H7C1S9	Sideroflexin-5	SFXN5	-3.37	3.3533e-05	0.438
P80723;U3KQP0	P80723	Brain acid soluble protein 1	BASP1	-2.46	3.37019e-05	0.439
P02748	P02748	Complement component C9;Complement component C9a;Complement component C9b	C9	-3.75	3.38837e-05	0.439
O43704;D6RD70	O43704	Sulfotransferase family cytosolic 1B member 1	SULT1B1	-4.22	3.40569e-05	0.44
Q96HD9;E9PRA7	Q96HD9	N-acyl-aromatic-L-amino acid amidohydrolase (carboxylate-forming)	ACY3	-4.43	3.42828e-05	0.44
A0A5F9UP49;Q9BRK5;A0A5F9UJX7;G3V1E2;H0Y3T6	A0A5F9UP49;Q9BRK5;A0A5F9UJX7;G3V1E2;H0Y3T6	45 kDa calcium-binding protein	SDF4	-3.31	3.44478e-05	0.441
P00739	P00739	Haptoglobin-related protein	HPR	-2.89	3.45714e-05	0.441
Q92539	Q92539	Phosphatidate phosphatase LPIN2	LPIN2	-4.25	3.51286e-05	0.443
Q04446;E9PGM4	Q04446;E9PGM4	1,4-alpha-glucan-branching enzyme	GBE1	-2.83	3.5196e-05	0.443
P30047;H0YNM1;A0A087WTI4	P30047	GTP cyclohydrolase 1 feedback regulatory protein	GCHFR	-4.15	3.52307e-05	0.443
Q4VC31	Q4VC31	Coiled-coil domain-containing protein 58	CCDC58	-3.98	3.54237e-05	0.443
Q9BXV9;H0YJA8	Q9BXV9	Uncharacterized protein C14orf142	C14orf142	-6.51	3.91223e-05	0.454
P80303;E9PKG6;A0A2R8Y6G7;E9PLR0;E9PLE9;H0YEG8;E9PM22;H0YD18;E9PJP3	P80303;E9PKG6	Nucleobindin-2;Nesfatin-1	NUCB2	-3.33	4.02439e-05	0.457
Q5BKU9	Q5BKU9	Oxidoreductase-like domain-containing protein 1	OXLD1	-5.22	4.04393e-05	0.458
P14209;A8MQT7	P14209	CD99 antigen	CD99	-6.58	4.11066e-05	0.46
Q13884;A0A3B3ITC2;E5RIX7	Q13884;A0A3B3ITC2	Beta-1-syntrophin	SNTB1	-2.38	4.1271e-05	0.46
Q5T4U5;P11310;F6YB23;A0A7P0T932;A0A7P0TB51;A0A7P0T8G6;A0A7P0TAB2;A0A7P0TBD1;A0A7P0T8J9;A0A7P0TA63;E9PJM9;A0A7P0TA39;A0A7P0TB28;E9PRX4;A0A7P0T9W7	Q5T4U5;P11310;F6YB23;A0A7P0T932;A0A7P0TB51;A0A7P0T8G6	Medium-chain specific acyl-CoA dehydrogenase, mitochondrial	ACADM	-2.8	4.16014e-05	0.461
Q5TAQ9;Q5TAQ8;V9GYQ9;V9GZ39;Q5TAQ7;Q5TAQ5;Q5TAQ6;A6NGE4	Q5TAQ9	DDB1- and CUL4-associated factor 8	DCAF8	-2.88	4.18217e-05	0.462
P07954;A0A804HI24;A0A804HKE6	P07954;A0A804HI24	Fumarate hydratase, mitochondrial	FH	-2.36	4.23746e-05	0.463
P54855	P54855	UDP-glucuronosyltransferase 2B15	UGT2B15	-4.38	4.23943e-05	0.463
Q9HCN8	Q9HCN8	Stromal cell-derived factor 2-like protein 1	SDF2L1	-3.94	4.25157e-05	0.463
P15907;C9J6X5;H7C472;C9JFM4;C9K0R8;C9JR47;C9JI90;C9JKG0;C9JTR0;C9JPG6	P15907	Beta-galactoside alpha-2,6-sialyltransferase 1	ST6GAL1	-3.15	4.33245e-05	0.465
P22307;E9PLD1;H0YF61;H0YCB0;H0YD06	P22307	Non-specific lipid-transfer protein	SCP2	-3.31	4.37368e-05	0.466
Q96HY7;C9JWN1;H7C1J3;H7C149	Q96HY7	Probable 2-oxoglutarate dehydrogenase E1 component DHKTD1, mitochondrial	DHTKD1	-5.33	4.3764e-05	0.467
P48775	P48775	Tryptophan 2,3-dioxygenase	TDO2	-4.72	4.41337e-05	0.467
P08519;A0A087WWY0	P08519	Apolipoprotein(a)	LPA	-4.84	4.47087e-05	0.469
A6NMQ3;Q5T5H1;O43768;A0A1W2PRU0	A6NMQ3;Q5T5H1;O43768;A0A1W2PRU0	Alpha-endosulfine	ENSA	-6.36	4.49776e-05	0.469
P12235;V9GYG0;Q9H0C2	P12235;V9GYG0	ADP/ATP translocase 1	SLC25A4	-4.1	4.50872e-05	0.47
O75911;Q5SUY4;A0A087WTY3	O75911	Short-chain dehydrogenase/reductase 3	DHRS3	-3.79	4.52781e-05	0.47
O75874;C9J4N6;C9JLU6;C9JJE5	O75874	Isocitrate dehydrogenase [NADP] cytoplasmic	IDH1	-2.53	4.67146e-05	0.473
Q5VY30;P02753	Q5VY30;P02753	Retinol-binding protein 4;Plasma retinol-binding protein(1-182);Plasma retinol-binding protein(1-181);Plasma retinol-binding protein(1-179);Plasma retinol-binding protein(1-176)	RBP4	-3.25	4.70731e-05	0.474
Q9P0Z9	Q9P0Z9	Peroxisomal sarcosine oxidase	PIPOX	-3.04	4.71115e-05	0.474
Q9Y6I9;A0A087WTU3;C9JXQ7;C9JHH5;C9JUC3;C9J7N0;C9JL43	Q9Y6I9;A0A087WTU3;C9JXQ7;C9JHH5	Testis-expressed sequence 264 protein	TEX264	-2.46	4.71735e-05	0.475
Q8N4Q0;J3KTQ8;J3QQQ7	Q8N4Q0	Zinc-binding alcohol dehydrogenase domain-containing protein 2	ZADH2	-2.98	4.80377e-05	0.476
Q9H8H3;H0YI09;F8VQX6	Q9H8H3;H0YI09;F8VQX6	Methyltransferase-like protein 7A	METTL7A	-2.92	4.85247e-05	0.478
K7EKE6;P36776;K7EJE8;K7ER27;K7ERR6;K7EQF8;K7ER56;REV__R4GNJ5;REV__Q96AP0;REV__A0A590TQL1	K7EKE6;P36776;K7EJE8	Lon protease homolog, mitochondrial	LONP1	-2.12	4.95905e-05	0.48
Q8N0U4;C9JFL0	Q8N0U4;C9JFL0	Protein FAM185A	FAM185A	-4.22	5.00347e-05	0.481
Q9Y4H2	Q9Y4H2	Insulin receptor substrate 2	IRS2	-2.53	5.00772e-05	0.481
Q96GK7;Q6P2I3;C9JGM0;C9J5B6	Q96GK7;Q6P2I3	Fumarylacetoacetate hydrolase domain-containing protein 2A;Fumarylacetoacetate hydrolase domain-containing protein 2B	FAHD2A;FAHD2B	-4.75	5.01149e-05	0.481
Q6P587	Q6P587	Acylpyruvase FAHD1, mitochondrial	FAHD1	-3.86	5.02683e-05	0.481
E9PNA7;Q5XXA6;E9PP68;E9PS90	E9PNA7;Q5XXA6	Anoctamin;Anoctamin-1	ANO1	-4.07	5.05826e-05	0.482
P02766;A0A087WT59	P02766;A0A087WT59	Transthyretin	TTR	-4.91	5.18508e-05	0.485
Q02818;H7BZI1;C9JKZ2;C9JBD3;C9J3C1	Q02818;H7BZI1	Nucleobindin-1	NUCB1	-2.58	5.19422e-05	0.485
O14874;H3BTL2;H3BS02;H3BNP3;H3BUV3;H3BQP2;REV__I3L1Y1;REV__Q15546;REV__A0A3B3ITQ3	O14874;H3BTL2;H3BS02	[3-methyl-2-oxobutanoate dehydrogenase [lipoamide]] kinase, mitochondrial	BCKDK	-4.15	5.21867e-05	0.485
Q08426;C9JJE0	Q08426	Peroxisomal bifunctional enzyme;Enoyl-CoA hydratase/3,2-trans-enoyl-CoA isomerase;3-hydroxyacyl-CoA dehydrogenase	EHHADH	-2.33	5.25132e-05	0.486
Q9Y2D5	Q9Y2D5	A-kinase anchor protein 2	AKAP2	-3.95	5.40995e-05	0.489
Q9UHD4	Q9UHD4	Cell death activator CIDE-B	CIDEB	-4.5	5.47938e-05	0.49
P16930;H3BNP8	P16930	Fumarylacetoacetase	FAH	-3.25	5.50937e-05	0.491
Q9H4I2;H0Y6F5;H0YNY7;A0A0A0MSU5;F6UQN6;H0YLR4	Q9H4I2;H0Y6F5	Zinc fingers and homeoboxes protein 3	ZHX3	-2.28	5.55306e-05	0.492
P42765;A0A0B4J2A4	P42765;A0A0B4J2A4	3-ketoacyl-CoA thiolase, mitochondrial	ACAA2	-2.4	5.56002e-05	0.492
H7C348;A6NK44	H7C348;A6NK44	Glyoxalase domain-containing protein 5	GLOD5	-3.93	5.58419e-05	0.492
Q8TBG4;E7ENR6;D6RFL9;D6RGG2;D6R9Y3	Q8TBG4;E7ENR6	Ethanolamine-phosphate phospho-lyase	ETNPPL	-5.45	5.60511e-05	0.493
P20742;F5GXY0	P20742	Pregnancy zone protein	PZP	-5.48	5.78142e-05	0.496
P16260;V9GZ24;V9GY06;V9GYB8;V9GYA5	P16260	Graves disease carrier protein	SLC25A16	-4.52	5.84833e-05	0.497
Q99624;A0A087WVW8;A0A087X1Q4;A0A087X175;A0A087WWS5	Q99624	Sodium-coupled neutral amino acid transporter 3	SLC38A3	-5	5.88045e-05	0.498
Q8N0W3;J3KSP6;I3L3J1;I3L106;I3L171;I3L1X0;J3KTP6	Q8N0W3;J3KSP6	L-fucose kinase	FUK	-3.45	5.8991e-05	0.498
P0C024;H3BRQ8;A0A087WVP7;H3BMZ7	P0C024;H3BRQ8;A0A087WVP7	Peroxisomal coenzyme A diphosphatase NUDT7	NUDT7	-3.97	5.94014e-05	0.499
Q9NRY4	Q9NRY4	Rho GTPase-activating protein 35	ARHGAP35	-2.53	5.99387e-05	0.5
Q9Y5Z4;Q5THN1;C9IZA0	Q9Y5Z4	Heme-binding protein 2	HEBP2	-3.03	6.01417e-05	0.5
P13804;A0A8I5KYP7;A0A8I5KT03;H3BV91;A0A8I5KUF3;H0YKF0;H0YK49;A0A8I5KVC9	P13804;A0A8I5KYP7;A0A8I5KT03;H3BV91;A0A8I5KUF3;H0YKF0;H0YK49;A0A8I5KVC9	Electron transfer flavoprotein subunit alpha, mitochondrial	ETFA	-2.54	6.04199e-05	0.5
Q8N8N7;G3V3Y1;G3V2R9	Q8N8N7;G3V3Y1;G3V2R9	Prostaglandin reductase 2	PTGR2	-3.38	6.04256e-05	0.5
Q9UK76;J3KT51;J3KSH8	Q9UK76;J3KT51;J3KSH8	Hematological and neurological expressed 1 protein;Hematological and neurological expressed 1 protein, N-terminally processed	HN1	-3.95	6.13197e-05	0.502
P53597;A0A494C0D1;H7C233	P53597;A0A494C0D1	Succinyl-CoA ligase [ADP/GDP-forming] subunit alpha, mitochondrial	SUCLG1	-4.69	6.26678e-05	0.505
Q9NRP2;H3BPP2;H3BNN8;H3BQQ1;H3BTB6;A0A494C0Z3;H3BN28;A0A494C090;H3BRC3;H3BP68	Q9NRP2;H3BPP2	COX assembly mitochondrial protein 2 homolog	CMC2	-5.77	6.29829e-05	0.505
Q96BN8;H0Y9T0;H0Y8S4;D6RD57	Q96BN8	Ubiquitin thioesterase otulin	OTULIN	-4.92	6.38147e-05	0.507
K7ERG9;P00746	K7ERG9;P00746	Complement factor D	CFD	-4.86	6.48538e-05	0.508
Q9BV19;R4GMT4;A0A8I5QKT5;REV__H0YFT8;REV__F5GYW0;REV__Q86XR8	Q9BV19	Uncharacterized protein C1orf50	C1orf50	-3.22	6.56782e-05	0.51
O95210	O95210	Starch-binding domain-containing protein 1	STBD1	-3.02	6.59229e-05	0.51
A0A0C4DGU2;Q9Y4U1	A0A0C4DGU2;Q9Y4U1	Methylmalonic aciduria and homocystinuria type C protein	MMACHC	-3.39	6.60744e-05	0.511
F8VVM2;F8VWQ0	F8VVM2		SLC25A3	-5.97	6.79994e-05	0.514
A3KMH1	A3KMH1	von Willebrand factor A domain-containing protein 8	VWA8	-2.76	6.81494e-05	0.514
Q86XI6	Q86XI6	Protein phosphatase 1 regulatory subunit 3B	PPP1R3B	-4.56	6.86233e-05	0.515
A0A087WT95;P49753	A0A087WT95;P49753	Acyl-coenzyme A thioesterase 2, mitochondrial	ACOT2	-3.23	6.97415e-05	0.517
P10768;U3KQT1;X6RA14;H7BZT7	P10768;U3KQT1;X6RA14;H7BZT7	S-formylglutathione hydrolase	ESD	-2.96	7.17866e-05	0.52
P09234;A0A0A0MRR7;Q5TAL2	P09234;A0A0A0MRR7	U1 small nuclear ribonucleoprotein C	SNRPC	-5.76	7.20424e-05	0.52
P32929	P32929	Cystathionine gamma-lyase	CTH	-3.26	7.2396e-05	0.521
H0YAC1;P03952;E9PBC5;C9JCT1;C9J075	H0YAC1;P03952;E9PBC5	Plasma kallikrein;Plasma kallikrein heavy chain;Plasma kallikrein light chain	KLKB1	-4.17	7.27335e-05	0.521
Q5T5P2;Q5T5P1;Q5T5P0;A0A0U1RRK8;A0A1B0GU17;A0A0U1RQK8	Q5T5P2	Sickle tail protein homolog	KIAA1217	-2.38	7.43695e-05	0.524
Q13131;Q96E92	Q13131	5-AMP-activated protein kinase catalytic subunit alpha-1	PRKAA1	-2.07	7.50204e-05	0.525
Q92781;F8VVC7;H0YHP7;F8VUB9	Q92781;F8VVC7	11-cis retinol dehydrogenase	RDH5	-4.98	7.69078e-05	0.528
A0A1B0GW77;P49419;A0A1B0GTG2;A0A1B0GUA1;A0A1B0GW82;A0A1B0GTJ4;A0A1B0GV49;A0A0J9YWF7;A0A1B0GUY0	A0A1B0GW77;P49419;A0A1B0GTG2;A0A1B0GUA1;A0A1B0GW82;A0A1B0GTJ4;A0A1B0GV49;A0A0J9YWF7	Alpha-aminoadipic semialdehyde dehydrogenase	ALDH7A1	-3	7.72666e-05	0.528
Q9HD15;R4GMW4	Q9HD15	Steroid receptor RNA activator 1	SRA1	-4.59	7.76229e-05	0.529
Q9UBS8;D6RA38;E7EP22;D6RDU6;D6RBU3;D6R996;D6R988;D6RBK4;D6RAS4	Q9UBS8;D6RA38	E3 ubiquitin-protein ligase RNF14	RNF14	-2.55	7.85879e-05	0.53
Q86XE5;H7BY76	Q86XE5	4-hydroxy-2-oxoglutarate aldolase, mitochondrial	HOGA1	-3.36	7.9516e-05	0.531
P06737;E9PK47	P06737;E9PK47	Glycogen phosphorylase, liver form;Alpha-1,4 glucan phosphorylase	PYGL	-2.59	8.01936e-05	0.532
P27338	P27338	Amine oxidase [flavin-containing] B	MAOB	-2.77	8.13189e-05	0.534
P02647;F8W696	P02647;F8W696	Apolipoprotein A-I;Proapolipoprotein A-I;Truncated apolipoprotein A-I	APOA1	-2.88	8.14596e-05	0.534
Q9H0W9;A0A087WT99;E9PQS1;E9PPB5;E9PIP1;E9PLC5;E9PLB3;E9PR95	Q9H0W9;A0A087WT99;E9PQS1;E9PPB5	Ester hydrolase C11orf54	C11orf54	-2.87	8.26201e-05	0.535
P36537	P36537	UDP-glucuronosyltransferase 2B10	UGT2B10	-4.16	8.45968e-05	0.538
Q5F1R6;A0A2R8Y534;A0A2R8Y4Q0;A0A2R8Y4N5	Q5F1R6;A0A2R8Y534;A0A2R8Y4Q0	DnaJ homolog subfamily C member 21	DNAJC21	-2.82	8.53612e-05	0.539
P0DP25;P0DP24;P0DP23;E7EMB3;Q96HY3;G3V361;A0A590UJI2;M0QZ52;A0A590UJC0;F8WBR5;G3V226;G3V479;C9J7T9;P02585	P0DP25;P0DP24;P0DP23;E7EMB3;Q96HY3;G3V361;A0A590UJI2		CALM2;CALM1	-2.55	8.56949e-05	0.539
P09467;A0A3B3IUC7;A0A804HJK9;Q5VZC3	P09467;A0A3B3IUC7;A0A804HJK9	Fructose-1,6-bisphosphatase 1	FBP1	-2.64	8.62547e-05	0.54
P10632;B7Z1F5;G3V188;A0A0D9SG51;E9PLI9;E9PIW6	P10632;B7Z1F5;G3V188;A0A0D9SG51	Cytochrome P450 2C8	CYP2C8	-3.94	8.64808e-05	0.54
P23786;A0A1B0GVF3;A0A1B0GTB8;A0A1B0GWC0;A0A1B0GV75;A0A1B0GTM0;A0A1B0GUD9;A0A1B0GTL9;A0A1B0GUB8	P23786;A0A1B0GVF3;A0A1B0GTB8;A0A1B0GWC0;A0A1B0GV75	Carnitine O-palmitoyltransferase 2, mitochondrial	CPT2	-2.3	8.87776e-05	0.543
P30048	P30048	Thioredoxin-dependent peroxide reductase, mitochondrial	PRDX3	-2.25	8.8932e-05	0.543
P11766;H0YAG8;D6RFE4;D6R9G2;D6RAY0	P11766;H0YAG8	Alcohol dehydrogenase class-3	ADH5	-2.45	8.98463e-05	0.545
P82980;A0A0B4J233;F5H2Q2	P82980;A0A0B4J233	Retinol-binding protein 5	RBP5	-3.05	8.99979e-05	0.545
Q15043;E5RFT1;E5RIP4;E5RFZ8;E5RGA7;E5RJ40;E5RJG5	Q15043;E5RFT1	Zinc transporter ZIP14	SLC39A14	-3.73	9.09928e-05	0.546
Q9NRY5;E7ESJ7;E5RGF9;E5RFK2;E5RHI8;E5RK42;E5RHP2;E5RH43	Q9NRY5;E7ESJ7	Protein FAM114A2	FAM114A2	-3.84	9.22322e-05	0.547
Q6P1X6;H0YF29;J3KNI2	Q6P1X6;H0YF29	UPF0598 protein C8orf82	C8orf82	-4.99	9.29033e-05	0.548
O95081;A0A0C4DG34;H7BZA5	O95081;A0A0C4DG34	Arf-GAP domain and FG repeat-containing protein 2	AGFG2	-3.68	9.32137e-05	0.548
P41567;K7EM18	P41567;K7EM18	Eukaryotic translation initiation factor 1	EIF1	-3.61	9.33983e-05	0.549
P21399;F5H2R8;F5H143	P21399	Cytoplasmic aconitate hydratase	ACO1	-2.7	9.43425e-05	0.55
P82909	P82909	28S ribosomal protein S36, mitochondrial	MRPS36	-2.36	9.49626e-05	0.55
A0A7P0TAR1;P43155;A0A7P0T9R9;A0A7P0T9E7;H0Y4Z7;A0A7P0TBF3;A0A7P0TAQ4;B7ZBP5;A6PVN3	A0A7P0TAR1;P43155;A0A7P0T9R9;A0A7P0T9E7;H0Y4Z7;A0A7P0TBF3	Carnitine O-acetyltransferase	CRAT	-2.67	9.70389e-05	0.553
P04196	P04196	Histidine-rich glycoprotein	HRG	-2.34	9.72542e-05	0.553
Q96EI5;D6RD44;D6RCE9;D6RIH3;J3KQY4;D6RHZ1	Q96EI5;D6RD44;D6RCE9	Transcription elongation factor A protein-like 4	TCEAL4	-4.02	9.81768e-05	0.554
Q8WWV3;G3V1R2	Q8WWV3;G3V1R2	Reticulon-4-interacting protein 1, mitochondrial	RTN4IP1	-2.72	0.000101516	0.558
P55957	P55957	BH3-interacting domain death agonist;BH3-interacting domain death agonist p15;BH3-interacting domain death agonist p13;BH3-interacting domain death agonist p11	BID	-4.84	0.000101964	0.558
P04040;A0A3B3ITJ0	P04040	Catalase	CAT	-2.56	0.000102744	0.559
Q99959;A0A087WXY2	Q99959	Plakophilin-2	PKP2	-2.95	0.000103277	0.559
Q9Y6H1;Q5T1J5	Q9Y6H1;Q5T1J5	Coiled-coil-helix-coiled-coil-helix domain-containing protein 2;Putative coiled-coil-helix-coiled-coil-helix domain-containing protein CHCHD2P9, mitochondrial	CHCHD2;CHCHD2P9	-5.79	0.000103574	0.56
P52594;B8ZZY2;C9J2I0	P52594;B8ZZY2;C9J2I0	Arf-GAP domain and FG repeat-containing protein 1	AGFG1	-3.83	0.000104404	0.561
H0YFD6;P40939;A0A2R8Y4F5;A0A2R8YG21;A0A2R8Y688	H0YFD6;P40939;A0A2R8Y4F5;A0A2R8YG21	Trifunctional enzyme subunit alpha, mitochondrial;Long-chain enoyl-CoA hydratase;Long chain 3-hydroxyacyl-CoA dehydrogenase	HADHA	-2.28	0.000105441	0.562
P07902;G3V4G9;G3V3U5;G3V223;F2Z2X9;A0A8I5KVJ6;H0YJL3	P07902	Galactose-1-phosphate uridylyltransferase	GALT	-2.7	0.000108357	0.564
A0A0A0MSS8;P42330;S4R3Z2;S4R3D5	A0A0A0MSS8;P42330;S4R3Z2	Aldo-keto reductase family 1 member C3	AKR1C3	-3.64	0.000109334	0.565
Q8IWL3;B0QYH2;F8WBY7	Q8IWL3	Iron-sulfur cluster co-chaperone protein HscB, mitochondrial	HSCB	-2.74	0.000109875	0.566
P30086	P30086	Phosphatidylethanolamine-binding protein 1;Hippocampal cholinergic neurostimulating peptide	PEBP1	-2.64	0.000110861	0.567
Q5QJ74;A0A2R8YFB7;E9PNS0;E9PP54;B3KNB6;G3V147	Q5QJ74;A0A2R8YFB7	Tubulin-specific chaperone cofactor E-like protein	TBCEL	-2.92	0.000110961	0.567
B4DEE8;P16455	B4DEE8;P16455	Methylated-DNA--protein-cysteine methyltransferase	MGMT	-4.77	0.000111462	0.567
A0A0C4DGB9	A0A0C4DGB9		PPA2	-6.09	0.000112394	0.568
O95340	O95340	Bifunctional 3-phosphoadenosine 5-phosphosulfate synthase 2;Sulfate adenylyltransferase;Adenylyl-sulfate kinase	PAPSS2	-2.65	0.000112696	0.569
A0A7I2V586;A0A7I2V3U0;A0A7I2V3F1	A0A7I2V586;A0A7I2V3U0;A0A7I2V3F1			-3.74	0.000113926	0.57
O15084;B4DIW9	O15084;B4DIW9	Serine/threonine-protein phosphatase 6 regulatory ankyrin repeat subunit A	ANKRD28	-4.54	0.000114021	0.57
P05062;A0A3B3IS80;A0A3B3ITZ0	P05062;A0A3B3IS80	Fructose-bisphosphate aldolase B	ALDOB	-2.84	0.000114029	0.57
Q9NXJ5;U3KQG9;S4R2Y9;U3KQ24	Q9NXJ5;U3KQG9;S4R2Y9	Pyroglutamyl-peptidase 1	PGPEP1	-5.39	0.000114115	0.57
Q86VD7	Q86VD7	Mitochondrial coenzyme A transporter SLC25A42	SLC25A42	-5.07	0.00011445	0.57
O43896;A0A6Q8PGE4;I3L1B1	O43896	Kinesin-like protein KIF1C	KIF1C	-3.15	0.000116667	0.572
O75947;F5H608	O75947	ATP synthase subunit d, mitochondrial	ATP5H	-2.41	0.000117969	0.573
P48735;H0YL11;REV__I3L471;REV__I3L4U7;REV__I3L4H1;REV__Q00169	P48735;H0YL11	Isocitrate dehydrogenase [NADP], mitochondrial	IDH2	-2.28	0.000120377	0.575
B7ZKQ9;A0A7P0T9I2;Q8WTV0;A0A7P0T913;F5H4X0;A0A7P0T9B3;A0A7P0Z4E3;A0A0S2Z3I2;F5H5E8	B7ZKQ9;A0A7P0T9I2;Q8WTV0;A0A7P0T913;F5H4X0;A0A7P0T9B3;A0A7P0Z4E3;A0A0S2Z3I2	Scavenger receptor class B member 1	SCARB1	-2.81	0.000120516	0.575
A0A3B3ITP4;Q495G5;Q8IVH4;D6RIS5;A0A7P0TAV9;A0A3B3IRG3	A0A3B3ITP4;Q495G5;Q8IVH4;D6RIS5	Methylmalonic aciduria type A protein, mitochondrial	MMAA	-2.39	0.000120789	0.576
P55084;F5GZQ3;B5MD38;C9JEY0;C9JE81;C9K0M0	P55084;F5GZQ3;B5MD38	Trifunctional enzyme subunit beta, mitochondrial;3-ketoacyl-CoA thiolase	HADHB	-2.02	0.000122318	0.577
O60613;A0A3B3IT39;A0A0J9YX89;A8MZD0	O60613;A0A3B3IT39	15 kDa selenoprotein	42248	-2.3	0.000123606	0.578
Q8NDI1;B5MC86;H7BZ98;C9IYU2;H7C1E6;C9K0H9;H7C0Q4;C9J268;C9JEP1	Q8NDI1	EH domain-binding protein 1	EHBP1	-2.54	0.000124704	0.579
P05165;A0A1B0GU58;A0A1B0GWI4;A0A1B0GUX9;A0A1B0GWA1;A0A1B0GTR1;Q5JTW6;H0Y4B9;Q5JVH2;H0Y798;A0A2R8Y725	P05165;A0A1B0GU58;A0A1B0GWI4;A0A1B0GUX9;A0A1B0GWA1	Propionyl-CoA carboxylase alpha chain, mitochondrial	PCCA	-2.26	0.000125659	0.58
O76071	O76071	Probable cytosolic iron-sulfur protein assembly protein CIAO1	CIAO1	-3.09	0.000126287	0.58
A0A494C0F3;C9J719;C9JJ78	A0A494C0F3;C9J719;C9JJ78		EBP	-5.02	0.000127022	0.581
Q765P7;H3BPV0	Q765P7	MTSS1-like protein	MTSS1L	-2.71	0.000128501	0.582
Q9UJC5	Q9UJC5	SH3 domain-binding glutamic acid-rich-like protein 2	SH3BGRL2	-3.36	0.000128585	0.582
P45973;F8VNY3	P45973	Chromobox protein homolog 5	CBX5	-3.69	0.000129719	0.583
Q9BXK5;A0A087WX97;A0A087WTL4;E9PDD6;F2Z2C3;A0A087WW80;A0A0A0MR90;F6VJB4;H0Y3R5	Q9BXK5;A0A087WX97;A0A087WTL4	Bcl-2-like protein 13	BCL2L13	-2.66	0.000130099	0.583
Q8IXQ4;A0A0A0MRI1;A0A087WW86	Q8IXQ4;A0A0A0MRI1	GPALPP motifs-containing protein 1	GPALPP1	-4.26	0.000130572	0.584
G3V1N2	G3V1N2		HBA2	-7.14	0.000131567	0.584
Q8N3V7	Q8N3V7	Synaptopodin	SYNPO	-3.79	0.000134768	0.587
Q8WYK0	Q8WYK0	Acyl-coenzyme A thioesterase 12	ACOT12	-3.97	0.000134828	0.587
Q9BSE5	Q9BSE5	Agmatinase, mitochondrial	AGMAT	-3.17	0.000135618	0.587
P35270;REV__Q16649	P35270	Sepiapterin reductase	SPR	-2.97	0.000137364	0.589
A1L0T0;M0R026;M0QZX5;E9PJS0;M0R1B5;E9PL44;E9PNL1	A1L0T0;M0R026	Acetolactate synthase-like protein	ILVBL	-2.49	0.000137549	0.589
Q8IVM8	Q8IVM8	Solute carrier family 22 member 9	SLC22A9	-5.53	0.000139062	0.59
P00738;J3KRH2;J3KSV1;J3QQI8;H3BMJ7	P00738	Haptoglobin;Haptoglobin alpha chain;Haptoglobin beta chain	HP	-2.82	0.000140424	0.591
P06133;A0A1W2PQJ2;D6RGY0	P06133;A0A1W2PQJ2	UDP-glucuronosyltransferase 2B4	UGT2B4	-3.33	0.000141601	0.592
Q9NP74;S4R313	Q9NP74;S4R313	Palmdelphin	PALMD	-3.39	0.000142497	0.592
Q8IZV5;E5RK48	Q8IZV5;E5RK48	Retinol dehydrogenase 10	RDH10	-3.72	0.000143246	0.593
A0A5F9ZHJ0;A0A5F9ZHD4	A0A5F9ZHJ0;A0A5F9ZHD4			-4.43	0.000143354	0.593
Q3ZCM7;A0A075B736;Q5SQY0	Q3ZCM7;A0A075B736;Q5SQY0	Tubulin beta-8 chain	TUBB8	-5.97	0.000144888	0.594
P11226	P11226	Mannose-binding protein C	MBL2	-3.5	0.00014673	0.595
Q709F0;D6RDI8;F8WEV0;H0Y9C6;A0A0J9YXS1	Q709F0;D6RDI8;F8WEV0	Acyl-CoA dehydrogenase family member 11	ACAD11	-2.47	0.000147036	0.595
P05181;H0Y7H4;H0Y593;F5H694	P05181;H0Y7H4;H0Y593	Cytochrome P450 2E1;Cytochrome P450 2E1, N-terminally processed	CYP2E1	-3.31	0.000147555	0.596
Q16851;E7EUC7;C9J6Q0	Q16851;E7EUC7	UTP--glucose-1-phosphate uridylyltransferase	UGP2	-2.54	0.000151533	0.598
A0A0C4DFM0;G3V5T0;A0A0A0MR33;G3V267;G3V3B9;G3V5U6;G3V5G8;H0YJN8	A0A0C4DFM0;G3V5T0;A0A0A0MR33;G3V267;G3V3B9		GSTZ1	-5.41	0.000153171	0.6
Q15424;K7EII0;K7ES42	Q15424	Scaffold attachment factor B1	SAFB	-2.43	0.000155081	0.601
Q7Z4W1;J3QS36;J3QRQ2	Q7Z4W1;J3QS36	L-xylulose reductase	DCXR	-2.92	0.000155406	0.601
O75381;K7EK59	O75381	Peroxisomal membrane protein PEX14	PEX14	-3.68	0.000155931	0.601
O00264	O00264	Membrane-associated progesterone receptor component 1	PGRMC1	-3.03	0.000159312	0.603
Q5JRA6;A0A0A0MRH6	Q5JRA6;A0A0A0MRH6	Melanoma inhibitory activity protein 3	MIA3	-2.05	0.000160846	0.604
P51570;K7EII7;K7ERJ9;K7ERN9	P51570;K7EII7	Galactokinase	GALK1	-2.35	0.000163483	0.606
O60784;V9GYF4;B0QY02;H7BYN7;V9GZ68;F8WE29;F8WB30;F8WAW7;F8WBB0	O60784	Target of Myb protein 1	TOM1	-2.63	0.000164916	0.607
Q9H019;E9PLD2;C9JF50;E9PLU1;E9PRK5;E9PPF9;E9PPQ0;E9PRW1;E9PSD6	Q9H019;E9PLD2;C9JF50;E9PLU1;E9PRK5	Mitochondrial fission regulator 1-like	MTFR1L	-4.78	0.000165109	0.607
A0A2R8YEI5;P52757;B8ZZU1;H7C0V3;C9JQ94;H7C138;B3VCF5;B3VCF6;B3VCF4	A0A2R8YEI5;P52757	Beta-chimaerin	CHN2	-3.64	0.000165681	0.607
Q9NTX5;F2Z2D6;E9PJS8;J3KP84;E9PPG7;E9PRU6;E9PLY6;E9PIU8;H0Y525	Q9NTX5	Ethylmalonyl-CoA decarboxylase	ECHDC1	-2.7	0.000167402	0.608
P68366;C9JJQ8;C9JEV8;C9JQ00;C9JDL2	P68366	Tubulin alpha-4A chain	TUBA4A	-1.76	0.00016965	0.609
H3BN98;H3BPJ2;Q15041;H3BTX6;H3BS91	H3BN98			-4.05	0.000169872	0.61
Q9NUI1;Q4VXZ8;A0A0J9YWI0;A0A0J9YY83;G3V0I9;A0A0J9YXZ6;H7C078	Q9NUI1;Q4VXZ8;A0A0J9YWI0	Peroxisomal 2,4-dienoyl-CoA reductase	DECR2	-2.06	0.000173675	0.612
Q02318;C9J1K5;F8WD90	Q02318	Sterol 26-hydroxylase, mitochondrial	CYP27A1	-2.65	0.000173943	0.612
Q9NS86	Q9NS86	LanC-like protein 2	LANCL2	-2.99	0.000175181	0.613
P62633	P62633	Cellular nucleic acid-binding protein	CNBP	-4.75	0.000178366	0.614
O15245;F5GY86;F5H5P3	O15245	Solute carrier family 22 member 1	SLC22A1	-5.52	0.000178384	0.614
B4DLN1;I3L1E8	B4DLN1			-3.02	0.00018164	0.616
O00515;E9PDI4;A0A0J9YYF6;A0A0J9YW63;A0A0J9YVY2	O00515;E9PDI4	Ladinin-1	LAD1	-4.47	0.00018233	0.616
Q9UJS0;R4GN64	Q9UJS0	Calcium-binding mitochondrial carrier protein Aralar2	SLC25A13	-2.51	0.000182661	0.616
sp|A043304|abysis_43304;sp|A081279|abysis_81279;sp|A049449|abysis_49449;sp|A071450|abysis_71450;sp|A032124|abysis_32124;sp|A033545|abysis_33545;sp|A032259|abysis_32259	sp|A043304|abysis_43304;sp|A081279|abysis_81279			-4.26	0.000185494	0.618
A0A087WXB8;Q9Y274;C9IZL6;C9J480;C9J0E2;C9JWJ3;C9J9Y4;C9JWI9;C9JMW7	A0A087WXB8;Q9Y274;C9IZL6;C9J480;C9J0E2;C9JWJ3;C9J9Y4	Type 2 lactosamine alpha-2,3-sialyltransferase	ST3GAL6	-5.61	0.000188861	0.62
Q9H008;Q5T1Z0	Q9H008;Q5T1Z0	Phospholysine phosphohistidine inorganic pyrophosphate phosphatase	LHPP	-3.07	0.00018995	0.62
P05387;H0YDD8	P05387	60S acidic ribosomal protein P2	RPLP2	-2.3	0.000191332	0.621
P78310	P78310	Coxsackievirus and adenovirus receptor	CXADR	-4.44	0.000192862	0.622
Q9UDY2;A0A3B3ITE1;A0A1B0GTW1;A0A2R8YDH4;A0A3B3IRI3;A0A3B3IU51;A0A3B3ISZ5;A0A3B3ISF1;A0A3B3IRV6;A0A3B3IS03;A0A3B3IT83;U3KQJ2;A0A3B3IU26;B1AN86	Q9UDY2;A0A3B3ITE1;A0A1B0GTW1;A0A2R8YDH4;A0A3B3IRI3;A0A3B3IU51;A0A3B3ISZ5;A0A3B3ISF1;A0A3B3IRV6;A0A3B3IS03;A0A3B3IT83	Tight junction protein ZO-2	TJP2	-2.36	0.00019724	0.624
M0QZM1	M0QZM1		HNRNPM	-4.26	0.000197429	0.624
P22626;A0A7I2V323;A0A7I2V4N1;A0A7I2V3P1;A0A7I2V3P7;A0A7I2V4I6;A0A7I2V4S4;A0A024RA28;A0A087WUI2;A0A7I2V4N0;A0A7I2YQN4	P22626;A0A7I2V323;A0A7I2V4N1;A0A7I2V3P1;A0A7I2V3P7;A0A7I2V4I6;A0A7I2V4S4;A0A024RA28;A0A087WUI2;A0A7I2V4N0;A0A7I2YQN4	Heterogeneous nuclear ribonucleoproteins A2/B1	HNRNPA2B1;HNRPA2B1	-1.92	0.000199548	0.625
Q9Y3D2	Q9Y3D2	Methionine-R-sulfoxide reductase B2, mitochondrial	MSRB2	-3.06	0.000199621	0.625
Q7Z417	Q7Z417	Nuclear fragile X mental retardation-interacting protein 2	NUFIP2	-4.4	0.000200381	0.625
Q9Y2Z9;A0A0D9SFJ1;G3V3A1;G3V434;G3V2L5;G3V4A6	Q9Y2Z9;A0A0D9SFJ1	Ubiquinone biosynthesis monooxygenase COQ6, mitochondrial	COQ6	-2.2	0.000202781	0.626
A2VDF0;X6R6T9	A2VDF0;X6R6T9	Fucose mutarotase	FUOM	-6.89	0.000204516	0.627
Q32MZ4;C9JTC6	Q32MZ4	Leucine-rich repeat flightless-interacting protein 1	LRRFIP1	-2.47	0.000205815	0.628
P16118;Q4VBA9;I1Z9G3	P16118;Q4VBA9;I1Z9G3	6-phosphofructo-2-kinase/fructose-2,6-bisphosphatase 1;6-phosphofructo-2-kinase;Fructose-2,6-bisphosphatase	PFKFB1	-2.53	0.000206986	0.628
Q5TEU4;B3KR61	Q5TEU4;B3KR61	NADH dehydrogenase [ubiquinone] 1 alpha subcomplex assembly factor 5	NDUFAF5	-3.17	0.000207846	0.629
P19793;A0A5F9ZHH6;A0A087WZ88;P48443	P19793;A0A5F9ZHH6	Retinoic acid receptor RXR-alpha	RXRA	-2.27	0.000208881	0.629
O76031;H0YM48;H0YK07	O76031	ATP-dependent Clp protease ATP-binding subunit clpX-like, mitochondrial	CLPX	-1.85	0.00021034	0.63
Q9P287	Q9P287	BRCA2 and CDKN1A-interacting protein	BCCIP	-2.34	0.0002104	0.63
Q9NPD5;A0A0A6YYJ9;H0YGG9;F5H094;F5H8K0;K7ELV7;K7EPY8;H3BMA8;K7EP34	Q9NPD5;A0A0A6YYJ9;H0YGG9	Solute carrier organic anion transporter family member 1B3	SLCO1B3	-5.55	0.000211382	0.63
Q6ZWL3	Q6ZWL3	Cytochrome P450 4V2	CYP4V2	-3.59	0.000214483	0.631
Q9H477;H7C091;E9PBU0;E7EQ18	Q9H477	Ribokinase	RBKS	-2.52	0.000214581	0.631
Q8WW59	Q8WW59	SPRY domain-containing protein 4	SPRYD4	-2.88	0.000215424	0.632
Q6UN15;H0Y8P7	Q6UN15	Pre-mRNA 3-end-processing factor FIP1	FIP1L1	-2.79	0.000219329	0.633
P49189	P49189	4-trimethylaminobutyraldehyde dehydrogenase	ALDH9A1	-2.27	0.00022073	0.634
Q9BWJ5	Q9BWJ5	Splicing factor 3B subunit 5	SF3B5	-4.12	0.000221507	0.634
Q7Z434	Q7Z434	Mitochondrial antiviral-signaling protein	MAVS	-4.14	0.000221519	0.634
Q9H6S3;A0A3B3ISQ4;E9PLH1;E9PNT0;E9PN68;E9PLN2;H0YF37;H0YD62	Q9H6S3;A0A3B3ISQ4	Epidermal growth factor receptor kinase substrate 8-like protein 2	EPS8L2	-1.84	0.000221759	0.634
P48506;B4E2I4;E1CEI4;A0A0C4DGB2;D6RGF8	P48506;B4E2I4;E1CEI4;A0A0C4DGB2	Glutamate--cysteine ligase catalytic subunit	GCLC	-1.69	0.000223141	0.635
Q14894;I3L325;I3NI53;I3L2W5;I3L3J9	Q14894;I3L325;I3NI53;I3L2W5	Ketimine reductase mu-crystallin	CRYM	-3.86	0.000226093	0.636
O95396	O95396	Adenylyltransferase and sulfurtransferase MOCS3;Molybdopterin-synthase adenylyltransferase;Molybdopterin-synthase sulfurtransferase	MOCS3	-2.79	0.000229475	0.638
Q02218;E9PCR7;E9PDF2;E9PFG7;C9J4G7	Q02218;E9PCR7;E9PDF2;E9PFG7	2-oxoglutarate dehydrogenase, mitochondrial	OGDH	-1.81	0.000229746	0.638
Q9UDX3;A0A8I5QKM7;A0A8I5KSJ2;H7C077;A0A8I5KVX3;A0A8I5KTV1;F8WEM2;D7F472	Q9UDX3	SEC14-like protein 4	SEC14L4	-2.4	0.000230336	0.638
P55010;H0YLZ1;H0YN40;H0YMJ8;H0YM54;H0YK11;H0YK29	P55010	Eukaryotic translation initiation factor 5	EIF5	-2.08	0.0002309	0.638
P46527;E7ES52;H7C2T1	P46527;E7ES52	Cyclin-dependent kinase inhibitor 1B	CDKN1B	-3.59	0.000233095	0.639
Q92871;F8WFD5	Q92871	Phosphomannomutase 1	PMM1	-3.2	0.000236192	0.64
P09417;B7Z415;D6RGG7;H0Y8F7;D6RHJ7	P09417;B7Z415;D6RGG7	Dihydropteridine reductase	QDPR	-3.05	0.000238892	0.641
B4E1Z4;P00751;H7C5H1;A0A0G2JH38;C9JRT3;A0A0G2JHM4;A0A0G2JJ82;F2Z3N2;A0A0G2JI59;C9JYQ5;A2ABG0;F8WCJ9;A0A0G2JJM0	B4E1Z4;P00751	Complement factor B;Complement factor B Ba fragment;Complement factor B Bb fragment	CFB	-1.71	0.000244041	0.643
P10586;H0Y6Z7;H0Y7Z9;H0Y4H1;H0Y380;A2A437	P10586;H0Y6Z7;H0Y7Z9;H0Y4H1	Receptor-type tyrosine-protein phosphatase F	PTPRF	-3.21	0.000244132	0.643
E9PMS6;H0YDQ3;H0YDG6;H0YE95;U3KQE6;E9PMJ6	E9PMS6		LMO7	-2.4	0.00024772	0.644
O75674;J3KQU4;I3L4I4;I3L367;I3L4G0;I3NI44;I3L3T4;I3L1G1;I3L1Q1;I3L4N3;I3L3M3;I3L0N2;K7EP47	O75674;J3KQU4;I3L4I4;I3L367;I3L4G0;I3NI44;I3L3T4;I3L1G1	TOM1-like protein 1	TOM1L1	-3.52	0.000248166	0.645
Q9BTZ2;Q6PKH6;P0CG22;H0YKN3;A0A087WSZ6;H0YNP7;H0YLE1;F6TD35	Q9BTZ2	Dehydrogenase/reductase SDR family member 4	DHRS4	-3.25	0.000248942	0.645
Q9Y2T3;H0YDZ7;Q5SZC5	Q9Y2T3	Guanine deaminase	GDA	-2.17	0.000251119	0.646
P08034;C9JWU8;A0A2R8YD01	P08034	Gap junction beta-1 protein	GJB1	-5.17	0.000251396	0.646
Q9HBK9	Q9HBK9	Arsenite methyltransferase	AS3MT	-2.56	0.000256001	0.647
A0A087WV24;P20711;A0A087WU57;H7BZF7;F8WER1	A0A087WV24;P20711;A0A087WU57;H7BZF7	Aromatic-L-amino-acid decarboxylase	DDC	-3.37	0.000257901	0.648
Q86SQ0;A0A1W2PQ63;E9PGF6;G5E9V3;E9PDY7;A0A1W2PRT1;A0A1W2PRJ2	Q86SQ0;A0A1W2PQ63;E9PGF6	Pleckstrin homology-like domain family B member 2	PHLDB2	-2.23	0.000258853	0.648
O75764;S4R3M9	O75764;S4R3M9	Transcription elongation factor A protein 3	TCEA3	-2.8	0.000260766	0.649
Q14397	Q14397	Glucokinase regulatory protein	GCKR	-4.04	0.000261135	0.649
Q13228	Q13228	Selenium-binding protein 1	SELENBP1	-2.08	0.000263816	0.65
Q9NUJ1	Q9NUJ1	Mycophenolic acid acyl-glucuronide esterase, mitochondrial	ABHD10	-2.24	0.000267213	0.651
Q9UHB6;F8VQE1;F8VS07;F8VRN8;F8VTU2	Q9UHB6;F8VQE1;F8VS07;F8VRN8	LIM domain and actin-binding protein 1	LIMA1	-2.5	0.000268588	0.651
Q9UHK6;D6RB81;V9GZ45;V9GYP4;V9GYU9	Q9UHK6;D6RB81	Alpha-methylacyl-CoA racemase	AMACR	-2.58	0.00027034	0.652
O94760;B4DYP1	O94760;B4DYP1	N(G),N(G)-dimethylarginine dimethylaminohydrolase 1	DDAH1	-2.27	0.00027214	0.653
P19224;C9JMY5;H7C5F8	P19224	UDP-glucuronosyltransferase 1-6	UGT1A6	-3.66	0.000272913	0.653
Q96PE7;H7BZS7	Q96PE7;H7BZS7	Methylmalonyl-CoA epimerase, mitochondrial	MCEE	-2.87	0.00027513	0.654
F8W8M4;A0A494C1G0	F8W8M4;A0A494C1G0		ABLIM1	-4.1	0.000275359	0.654
O95429;H0YBT1	O95429	BAG family molecular chaperone regulator 4	BAG4	-2.9	0.000277755	0.654
H3BRF9;Q96K21;H3BN64;H3BRM1;H3BUW6	H3BRF9;Q96K21;H3BN64;H3BRM1	Abscission/NoCut checkpoint regulator	ZFYVE19	-4.24	0.000281147	0.655
Q15166;F8WD41;C9JZ99	Q15166;F8WD41;C9JZ99	Serum paraoxonase/lactonase 3	PON3	-3.75	0.000281481	0.655
Q16222;REV__E9PGW3;REV__Q14916	Q16222	UDP-N-acetylhexosamine pyrophosphorylase;UDP-N-acetylgalactosamine pyrophosphorylase;UDP-N-acetylglucosamine pyrophosphorylase	UAP1	-2.45	0.000289274	0.658
E9PE63;Q86UD5;B7Z676;D6RGJ7;A0A0C4DGB3	E9PE63;Q86UD5;B7Z676;D6RGJ7	Mitochondrial sodium/hydrogen exchanger 9B2	SLC9B2	-3.56	0.00029098	0.658
P49006	P49006	MARCKS-related protein	MARCKSL1	-6.78	0.00029224	0.659
Q15274;H3BP73	Q15274	Nicotinate-nucleotide pyrophosphorylase [carboxylating]	QPRT	-3.36	0.00029278	0.659
Q8ND30;A0A804HKA2;A0A804HJY3;E9PP16;E9PIK8;H0YDJ2;E9PMH3;E9PJA0;H0YET1;A0A3B3IS15;E9PI79;H0YDM0;E9PK17;E9PMN3	Q8ND30;A0A804HKA2;A0A804HJY3;E9PP16	Liprin-beta-2	PPFIBP2	-2.39	0.000296931	0.66
Q9Y281;F8WDN3;G3V2U0	Q9Y281	Cofilin-2	CFL2	-2.69	0.000298091	0.66
P11712;A0A2R8YF67	P11712;A0A2R8YF67	Cytochrome P450 2C9	CYP2C9	-4.42	0.000299256	0.661
Q9Y223	Q9Y223	Bifunctional UDP-N-acetylglucosamine 2-epimerase/N-acetylmannosamine kinase;UDP-N-acetylglucosamine 2-epimerase (hydrolyzing);N-acetylmannosamine kinase	GNE	-2.41	0.000299936	0.661
Q9BSH4;A0A804HJB7	Q9BSH4;A0A804HJB7	Translational activator of cytochrome c oxidase 1	TACO1	-2.64	0.000300684	0.661
O00273;K7ERT1	O00273	DNA fragmentation factor subunit alpha	DFFA	-2.64	0.000300704	0.661
Q8TCD1	Q8TCD1	UPF0729 protein C18orf32	C18orf32	-5.63	0.000301295	0.661
Q04609;Q9HBA9;E9PMK6;E9PKX5;E9PI29;E9PLV0;E9PKM3;E9PJV2	Q04609;Q9HBA9	Glutamate carboxypeptidase 2;Putative N-acetylated-alpha-linked acidic dipeptidase	FOLH1;FOLH1B	-3.45	0.000305457	0.662
Q8TD30;H3BU54	Q8TD30	Alanine aminotransferase 2	GPT2	-3.72	0.00030716	0.663
O60739;K7EQP2	O60739	Eukaryotic translation initiation factor 1b	EIF1B	-4.7	0.00030783	0.663
Q14554;H7C4F9;C9JY10;REV__sp|A049545|abysis_49545;REV__sp|A049531|abysis_49531;REV__sp|A049522|abysis_49522	Q14554	Protein disulfide-isomerase A5	PDIA5	-2.77	0.000308717	0.663
A0AV96;D6R9D6;B7Z8Z7;D6RBS9;D6REZ6;D6R9M7;D6RFL5;D6RBP6;D6RA49;D6RCT1;D6RF41	A0AV96;D6R9D6;B7Z8Z7;D6RBS9;D6REZ6	RNA-binding protein 47	RBM47	-2.56	0.000309854	0.664
A0A0A0MT83;P26440;A0A0S2Z4K7;H7C4G6;H0YN10;H0YLC3;H0YKV0;A0A087WVD3	A0A0A0MT83;P26440;A0A0S2Z4K7;H7C4G6	Isovaleryl-CoA dehydrogenase, mitochondrial	IVD	-2.56	0.000311957	0.664
Q96CN7;D6RGE2	Q96CN7	Isochorismatase domain-containing protein 1	ISOC1	-3.04	0.000312822	0.664
Q9NSK0;C9J8T5;H7C4M1;C9JXT5;C9JQU1;C9K0D5;K7EL76;Q6P597	Q9NSK0	Kinesin light chain 4	KLC4	-1.99	0.000317582	0.666
Q8N465;B5MCV2;G5E9E8;H7C0N1;F8WCF9;H7C021;H7C290	Q8N465;B5MCV2;G5E9E8	D-2-hydroxyglutarate dehydrogenase, mitochondrial	D2HGDH	-2.68	0.000328917	0.669
O00187	O00187	Mannan-binding lectin serine protease 2;Mannan-binding lectin serine protease 2 A chain;Mannan-binding lectin serine protease 2 B chain	MASP2	-3.43	0.000329637	0.669
P00734;E9PIT3;C9JV37	P00734;E9PIT3	Prothrombin;Activation peptide fragment 1;Activation peptide fragment 2;Thrombin light chain;Thrombin heavy chain	F2	-2.76	0.000331455	0.669
Q8NBF2	Q8NBF2	NHL repeat-containing protein 2	NHLRC2	-2.2	0.00033443	0.67
Q13438;B4E321;F8W1V2;F8W1N0;F8VZI7;F8W0R2	Q13438;B4E321	Protein OS-9	OS9	-2.2	0.000345005	0.673
Q9Y6B6;D6RD69;D6RDB2;D6RAA2	Q9Y6B6;D6RD69	GTP-binding protein SAR1b	SAR1B	-2.77	0.000350107	0.674
Q96IU4;B4DQI4	Q96IU4;B4DQI4	Alpha/beta hydrolase domain-containing protein 14B	ABHD14B	-2.36	0.000351528	0.674
A0A8C8KBT8;Q8TE04	A0A8C8KBT8;Q8TE04	Pantothenate kinase 1	PANK1	-3.38	0.000352268	0.674
Q5SRE7;X6RJK6;G5E9M0;X6RFQ9;X6RCI6;H7C3M4;F8WCG7	Q5SRE7;X6RJK6;G5E9M0	Phytanoyl-CoA dioxygenase domain-containing protein 1	PHYHD1	-1.91	0.00035461	0.675
Q6GMV3	Q6GMV3	Putative peptidyl-tRNA hydrolase PTRHD1	PTRHD1	-5.03	0.000364031	0.677
Q14571;H7C2X9	Q14571	Inositol 1,4,5-trisphosphate receptor type 2	ITPR2	-2	0.00036602	0.677
Q9UIS9;A0A0A0MS90;K7EN65;K7EPZ6;K7EMA9	Q9UIS9;A0A0A0MS90;K7EN65;K7EPZ6	Methyl-CpG-binding domain protein 1	MBD1	-2.65	0.000367523	0.678
P13196;H7C4H7;H7C5B0	P13196	5-aminolevulinate synthase, nonspecific, mitochondrial	ALAS1	-1.92	0.000370357	0.678
Q14558;B4DP31;C9J168;C9JNQ3;C9JUN4;C9JKT9	Q14558;B4DP31	Phosphoribosyl pyrophosphate synthase-associated protein 1	PRPSAP1	-2.83	0.000370393	0.678
P06730;D6RFJ3	P06730	Eukaryotic translation initiation factor 4E	EIF4E	-2.81	0.000373325	0.679
P43490;A0A7P0T9I9;A0A7P0T895;A0A7P0T973;A0A7P0T931;A0A7P0T8L3;A0A7P0TAS5;A0A7P0T862;A0A7P0T8D2;A0A0C4DFS8;A0A7P0T941;A0A7P0TBB7;A0A7P0TA73;A0A7P0Z466;B7Z8W6;A0A7P0Z4N0;A0A7P0T9F0;A0A7P0TB17;A0A7P0T8Z3;A0A7P0T8R4;A0A7P0TAI8;A0A7P0Z437;C9JG65;C9JF35;A0A7P0Z4L4;A0A7P0TAZ2	P43490;A0A7P0T9I9;A0A7P0T895;A0A7P0T973;A0A7P0T931;A0A7P0T8L3;A0A7P0TAS5;A0A7P0T862;A0A7P0T8D2;A0A0C4DFS8	Nicotinamide phosphoribosyltransferase	NAMPT	-1.7	0.000374016	0.679
Q9BT30;M0QZI0;M0QZH2	Q9BT30	Alpha-ketoglutarate-dependent dioxygenase alkB homolog 7, mitochondrial	ALKBH7	-3.49	0.000374072	0.679
Q14847;C9J9W2;F6S2S5;K7ESD6;J3KSN1;F1T0D7	Q14847;C9J9W2	LIM and SH3 domain protein 1	LASP1	-2.39	0.000375375	0.679
Q9NYF8;H0YF14	Q9NYF8	Bcl-2-associated transcription factor 1	BCLAF1	-4.36	0.000378308	0.68
Q09666;E9PKR9;E9PLK4;E9PJZ0;E9PJC6;E9PQE3	Q09666	Neuroblast differentiation-associated protein AHNAK	AHNAK	-2.51	0.000383947	0.681
P09210	P09210	Glutathione S-transferase A2	GSTA2	-7.23	0.000390974	0.683
Q13155;A8MU58;F8WCL2	Q13155;A8MU58	Aminoacyl tRNA synthase complex-interacting multifunctional protein 2	AIMP2	-2.93	0.000392294	0.683
Q8N5X7;C9JUY2;C9J6E5;C9J7Z6;A0A3B3IRU0;A0A3B3ITM5	Q8N5X7	Eukaryotic translation initiation factor 4E type 3	EIF4E3	-5.38	0.00039273	0.683
H3BNT4;Q99547;H3BSB3;H3BNK8;H3BU96	H3BNT4;Q99547;H3BSB3	M-phase phosphoprotein 6	MPHOSPH6	-3.45	0.00039348	0.683
F8W7Q4;A0A8I5KUL7;Q96A26;E9PH05;A0A8I5QJA3;A0A8I5KW67;A0A8I5KUT6;A0A8I5KQT5	F8W7Q4;A0A8I5KUL7;Q96A26;E9PH05	Protein FAM162A	FAM162A	-2.06	0.000393802	0.683
P35609;A0A494C1A0;A0A804HI95;A0A804HKG0;A0A494C033;A0A494C166;A0A494C0Q3;A0A494C060	P35609;A0A494C1A0;A0A804HI95;A0A804HKG0;A0A494C033;A0A494C166	Alpha-actinin-2	ACTN2	-3.7	0.000393861	0.683
E5RHG8;Q15369;R4GMY8;A0A8I5KYG1	E5RHG8;Q15369;R4GMY8;A0A8I5KYG1	Transcription elongation factor B polypeptide 1	TCEB1	-3.07	0.000396803	0.684
Q9HCS2;F8VZP1;F8VR75	Q9HCS2	Cytochrome P450 4F12	CYP4F12	-4.55	0.00039775	0.684
B3KUS5;Q70CQ3;F5H8D3;F5H3L3;F5GXG2	B3KUS5;Q70CQ3;F5H8D3	Ubiquitin carboxyl-terminal hydrolase;Ubiquitin carboxyl-terminal hydrolase 30	USP30	-2.99	0.000404096	0.685
O60879	O60879	Protein diaphanous homolog 2	DIAPH2	-2.71	0.000404638	0.685
Q6ZNB7	Q6ZNB7	Alkylglycerol monooxygenase	AGMO	-3.95	0.000409421	0.686
P61513;C9J4Z3;Q6P4E4;E9PEL3;M0R0A1;M0R2L6;G5E9R3;A6NKH3	P61513;C9J4Z3;Q6P4E4;E9PEL3;M0R0A1;M0R2L6;G5E9R3	60S ribosomal protein L37a	RPL37A	-5.11	0.000411057	0.687
P45381;I3L0T3;I3L4M0	P45381	Aspartoacylase	ASPA	-2.8	0.000413899	0.687
P62072	P62072	Mitochondrial import inner membrane translocase subunit Tim10	TIMM10	-3.23	0.000416772	0.688
Q9NRM0	Q9NRM0	Solute carrier family 2, facilitated glucose transporter member 9	SLC2A9	-3.38	0.000418638	0.688
Q9HBY8;X6R8H3;A0A3B3IT40;F2Z3C8;A0A3B3IRX6;A0A3B3IRL0;Q5H8Y5	Q9HBY8;X6R8H3;A0A3B3IT40;F2Z3C8	Serine/threonine-protein kinase Sgk2	SGK2	-3.35	0.000425472	0.689
A0A8I5KT56;A0A087WXI3	A0A8I5KT56;A0A087WXI3		FMR1	-2.36	0.000425703	0.689
B8ZZF5;Q9H8M9;C9J5M4	B8ZZF5;Q9H8M9;C9J5M4	Protein eva-1 homolog A	EVA1A	-4.64	0.000426747	0.69
Q13480;B7Z3B9;D6RIS0;H0Y8F4;D6RIF8	Q13480;B7Z3B9	GRB2-associated-binding protein 1	GAB1	-3.33	0.000431416	0.69
Q71U36;P0DPH8;P0DPH7;Q6PEY2	Q71U36;P0DPH8;P0DPH7	Tubulin alpha-1A chain	TUBA1A	-4.86	0.000431568	0.69
A8MXZ4;A0A0C4DFY5;Q9NQ84;J9JIE0	A8MXZ4;A0A0C4DFY5;Q9NQ84;J9JIE0	G-protein coupled receptor family C group 5 member C	GPRC5C	-3.48	0.000433377	0.691
P31930	P31930	Cytochrome b-c1 complex subunit 1, mitochondrial	UQCRC1	-1.99	0.000435719	0.691
P53816;A0A1W2PRW4;F5H7E5	P53816;A0A1W2PRW4	HRAS-like suppressor 3	PLA2G16	-4.08	0.000449527	0.694
Q96PC5;G3V599;Q86UF2;A4D2H0;A0A5F9ZHA4;A0A2R8YE69;A4FU28;Q8IX94;P0CG41;G3V5K6;G3V4M1;G3V3C4;Q8IX95	Q96PC5;G3V599	Melanoma inhibitory activity protein 2	MIA2	-2.25	0.000456821	0.695
A0A5F9UY30;O43493	A0A5F9UY30;O43493	Trans-Golgi network integral membrane protein 2	TGOLN2	-4.26	0.000463473	0.696
I3L448;Q5TC12;A8MRA7;H0YEW4;H0YD21;H0YDD6;H0YCA6	I3L448;Q5TC12;A8MRA7;H0YEW4;H0YD21	ATP synthase mitochondrial F1 complex assembly factor 1	ATPAF1	-3.59	0.000465961	0.696
O75822;H0YLP3;H0YGJ7	O75822	Eukaryotic translation initiation factor 3 subunit J	EIF3J	-2.02	0.000475302	0.698
Q8N9L9	Q8N9L9	Acyl-coenzyme A thioesterase 4	ACOT4	-3.6	0.000476061	0.698
Q9NZJ6;F6WGP0	Q9NZJ6	Ubiquinone biosynthesis O-methyltransferase, mitochondrial	COQ3	-3.21	0.000480842	0.699
O43772;C9JPE1;F8WEF6	O43772;C9JPE1	Mitochondrial carnitine/acylcarnitine carrier protein	SLC25A20	-2.07	0.000481628	0.699
P28289	P28289	Tropomodulin-1	TMOD1	-2.12	0.000483458	0.699
P02760;S4R3Y4;S4R471;CON__P00978	P02760;S4R3Y4	Protein AMBP;Alpha-1-microglobulin;Inter-alpha-trypsin inhibitor light chain;Trypstatin	AMBP	-2.56	0.000486976	0.7
A8MXP9	A8MXP9		MATR3	-1.84	0.000488334	0.7
I3L3Q4;I3L1F4;I3NI27;I3NI24;I3L2C2;I3L277	I3L3Q4		GLOD4	-5.52	0.000489645	0.7
K4DI92;Q6NW29;D6RCM5;D6RDH6;E7EV43	K4DI92;Q6NW29;D6RCM5;D6RDH6	RWD domain-containing protein 4	RWDD4	-4.16	0.00049043	0.7
Q9H910;A6NGP5;H3BMV3;H3BMM8;B4E1P3;H3BS08	Q9H910;A6NGP5;H3BMV3	Hematological and neurological expressed 1-like protein	HN1L	-3.12	0.000494826	0.701
Q9UKL6;I3L2M9;I3L3H0;I3L4Z8;J3QT99	Q9UKL6;I3L2M9;I3L3H0	Phosphatidylcholine transfer protein	PCTP	-3.29	0.000496984	0.701
O75438	O75438	NADH dehydrogenase [ubiquinone] 1 beta subcomplex subunit 1	NDUFB1	-6.35	0.00049802	0.701
Q13242;H0YIB4;S4R3G0	Q13242;H0YIB4;S4R3G0	Serine/arginine-rich splicing factor 9	SRSF9	-2.19	0.000499074	0.701
Q969U6;A0A096LNM2;A0A096LP04;A0A0A0MSK7;A0A0A0MSV8	Q969U6	F-box/WD repeat-containing protein 5	FBXW5	-2.05	0.000500435	0.702
A6NCS6	A6NCS6	Uncharacterized protein C2orf72	C2orf72	-3.4	0.000501878	0.702
Q9BYV7;H0YCN8;V9GYA9;H0YCL7;E9PS89	Q9BYV7;H0YCN8	Beta,beta-carotene 9,10-oxygenase	BCO2	-4.48	0.000502675	0.702
Q9Y478;F5H2X8;F5H610;F5H4Y8	Q9Y478	5-AMP-activated protein kinase subunit beta-1	PRKAB1	-3.91	0.000511932	0.703
P42126;Q96DC0;H3BS70	P42126;Q96DC0;H3BS70	Enoyl-CoA delta isomerase 1, mitochondrial	ECI1;DCI	-1.75	0.000512854	0.703
A0A3B3ITH3;Q9P2X3;J3QQU0;J3QRS6	A0A3B3ITH3;Q9P2X3	Protein IMPACT	IMPACT	-4.4	0.00051475	0.704
O75380;D6RBT3	O75380;D6RBT3	NADH dehydrogenase [ubiquinone] iron-sulfur protein 6, mitochondrial	NDUFS6	-4.18	0.000518191	0.704
P18283;H0YJK8	P18283;H0YJK8	Glutathione peroxidase 2	GPX2	-3.76	0.000527542	0.706
Q9NVF9;Q5SXX7;B7ZC34;Q5SXX8;H0Y771	Q9NVF9	Ethanolamine kinase 2	ETNK2	-3.64	0.000527571	0.706
E5KLJ9;A0A2R8YFD1;H7C141	E5KLJ9;A0A2R8YFD1		OPA1	-1.83	0.000531102	0.706
Q6IC98;H0Y5A3;X6RIP6	Q6IC98	GRAM domain-containing protein 4	GRAMD4	-3.16	0.00053175	0.706
Q9NZ45	Q9NZ45	CDGSH iron-sulfur domain-containing protein 1	CISD1	-2.44	0.000531892	0.706
Q00587;B0QYC6;B0QYC7;B0QYC8	Q00587	Cdc42 effector protein 1	CDC42EP1	-2.93	0.00053281	0.706
Q7L4I2;H0YGP9;E1B6W4	Q7L4I2	Arginine/serine-rich coiled-coil protein 2	RSRC2	-3.05	0.000533365	0.706
P02749;J3QRN2;J3QLI0;J3KS17;CON__P17690	P02749	Beta-2-glycoprotein 1	APOH	-2.78	0.00053497	0.707
O15514;E9PB93;E9PHV4	O15514;E9PB93;E9PHV4	DNA-directed RNA polymerase II subunit RPB4	POLR2D	-3.27	0.000535613	0.707
P51648;A0A5F9ZHN9;A0A5F9ZHI5;J3QRD1;A0A5F9ZGX4;A0A5F9ZI12;A0A5K1VW72;A0A5F9ZHZ9;I3L1M4;J3QS00;A0A5F9ZHP6;I3L0X1;J3KTG1;J3QKK9;J3KTD9;K7EN73;J3QQV9;I3L4G6	P51648;A0A5F9ZHN9;A0A5F9ZHI5;J3QRD1;A0A5F9ZGX4;A0A5F9ZI12;A0A5K1VW72	Fatty aldehyde dehydrogenase	ALDH3A2	-2.04	0.000536229	0.707
Q16718;A0A7I2V2W4;A0A087X1G1;H7BYD0;A0A7I2V3L8;F8WAS3;C9IZN5;A0A024R772;A0A087WXR5	Q16718;A0A7I2V2W4;A0A087X1G1;H7BYD0;A0A7I2V3L8;F8WAS3;C9IZN5	NADH dehydrogenase [ubiquinone] 1 alpha subcomplex subunit 5	NDUFA5	-3.34	0.000536249	0.707
Q9NZL9;H7C0X7;E5RJR3	Q9NZL9;H7C0X7	Methionine adenosyltransferase 2 subunit beta	MAT2B	-1.74	0.000537121	0.707
Q96KC8;Q5T1X2	Q96KC8	DnaJ homolog subfamily C member 1	DNAJC1	-2.67	0.00054054	0.707
Q15363;F5GX39;E7EQ72	Q15363;F5GX39;E7EQ72	Transmembrane emp24 domain-containing protein 2	TMED2	-2.79	0.000542632	0.708
A0A2R8Y595;A0A2R8YFL0;P49711;A0A2R8Y6Z6;A0A2R8Y6C1	A0A2R8Y595;A0A2R8YFL0;P49711	Transcriptional repressor CTCF	CTCF	-4.51	0.000546683	0.708
Q63HM1;K7EMI4;K7EK09;K7EMM5;W4VSQ7;K7EQK5;K7EPF8;K7EIX3	Q63HM1;K7EMI4;K7EK09;K7EMM5	Kynurenine formamidase	AFMID	-3	0.00054696	0.708
Q9H871;D6RER3;D6RIF9;F5H6G4;Q96G75	Q9H871	Protein RMD5 homolog A	RMND5A	-2.81	0.000561497	0.71
G3V1Y8;Q86U10;H0YHD3;H0YHG5	G3V1Y8;Q86U10	60 kDa lysophospholipase;L-asparaginase;Platelet-activating factor acetylhydrolase	ASPG	-4.22	0.000565117	0.711
Q86UE4	Q86UE4	Protein LYRIC	MTDH	-1.68	0.00056718	0.711
O95299;E7ESZ7;A0A087WXC5;A0A7I2V594;A0A7I2YQU0;A0A7I2V2X3;A0A7I2V4N8;H7C2X4;H7C1Y7;A0A7I2V5U7;A0A7I2V419;A0A7I2V458;A0A7I2V2W9;A0A7I2V327;A0A7I2V438;A0A7I2V5L0;A0A7I2V3H5;A0A7I2V2F6;C9J6X0;Q8N1B9;A0A7I2V3D4;A0A7I2V2I6;A0A7I2V2J5	O95299;E7ESZ7;A0A087WXC5;A0A7I2V594;A0A7I2YQU0;A0A7I2V2X3;A0A7I2V4N8;H7C2X4;H7C1Y7;A0A7I2V5U7;A0A7I2V419;A0A7I2V458;A0A7I2V2W9;A0A7I2V327;A0A7I2V438;A0A7I2V5L0;A0A7I2V3H5	NADH dehydrogenase [ubiquinone] 1 alpha subcomplex subunit 10, mitochondrial	NDUFA10	-1.94	0.000572424	0.712
A0A0A0MTI1;Q15392;A0A3B3ITT9;A0A3B3IRV7;A0A3B3ISR5	A0A0A0MTI1;Q15392	Delta(24)-sterol reductase	DHCR24	-4.06	0.000574718	0.712
Q9Y676;A0A0G2JIC6	Q9Y676;A0A0G2JIC6	28S ribosomal protein S18b, mitochondrial	MRPS18B	-2.19	0.000575733	0.712
P0CG38	P0CG38	POTE ankyrin domain family member I	POTEI	-5.24	0.000576172	0.712
A0A087X1F5;A0A087WYV9;A0A087WX56;Q9P0S2	A0A087X1F5;A0A087WYV9		SYNJ2BP-COX16	-1.98	0.000577912	0.712
O60437;K7EKI8;K7EQ71	O60437;K7EKI8;K7EQ71	Periplakin	PPL	-2.04	0.000578151	0.712
Q99538;G3V4E4;G3V2T4;G3V4P5;H0YJN9;G3V3Z4	Q99538	Legumain	LGMN	-2.09	0.000582733	0.713
Q04828;H0Y804;A6NHU4	Q04828;H0Y804	Aldo-keto reductase family 1 member C1	AKR1C1	-2.65	0.00059169	0.714
P48507	P48507	Glutamate--cysteine ligase regulatory subunit	GCLM	-1.65	0.000594763	0.714
Q9NSE4	Q9NSE4	Isoleucine--tRNA ligase, mitochondrial	IARS2	-1.9	0.000597454	0.715
A0A1W2PR06;P52569	A0A1W2PR06;P52569	Cationic amino acid transporter 2	SLC7A2	-2.71	0.000597592	0.715
Q969Z3;X1WI34;F6V6Z1	Q969Z3	Mitochondrial amidoxime reducing component 2	37316	-2.8	0.000599199	0.715
Q14157;F8W726;Q5VU77;Q5VU79;Q5VU78;Q5VU81;Q5VU80;H0Y5H6;H7C2T8	Q14157;F8W726	Ubiquitin-associated protein 2-like	UBAP2L	-3.24	0.0005997	0.715
Q8WVP5	Q8WVP5	Tumor necrosis factor alpha-induced protein 8-like protein 1	TNFAIP8L1	-2.22	0.000603455	0.715
P51580	P51580	Thiopurine S-methyltransferase	TPMT	-2.44	0.00060752	0.716
P08473;A0A7I2U302;A0A6Q8PFY6;C9IYX7;C9JDZ3;Q3KQS6	P08473;A0A7I2U302;A0A6Q8PFY6	Neprilysin	MME	-3.27	0.000610083	0.716
Q13442;F8WBW6	Q13442	28 kDa heat- and acid-stable phosphoprotein	PDAP1	-2.05	0.000615939	0.717
Q8NI60	Q8NI60	Atypical kinase ADCK3, mitochondrial	ADCK3	-2.43	0.000619422	0.717
P10909;H0YLK8;H0YC35;E7ERK6;E7ETB4;E5RJZ5;E5RGB0;E5RH61;H0YAS8;E5RG36	P10909;H0YLK8;H0YC35;E7ERK6	Clusterin;Clusterin beta chain;Clusterin alpha chain;Clusterin	CLU	-1.8	0.00062499	0.718
O76070;F8W754	O76070	Gamma-synuclein	SNCG	-3.37	0.000625418	0.718
Q13123;E7EQZ7;D6REL4;D6RAY9;D6RCQ4	Q13123	Protein Red	IK	-2.43	0.000633535	0.719
P30041	P30041	Peroxiredoxin-6	PRDX6	-1.76	0.000634798	0.719
P51857;C9J3U1	P51857	3-oxo-5-beta-steroid 4-dehydrogenase	AKR1D1	-2.43	0.000638958	0.719
P16104;Q96QV6	P16104;Q96QV6	Histone H2AX;Histone H2A type 1-A	H2AFX;HIST1H2AA	-5.76	0.00064524	0.72
Q9Y6M5	Q9Y6M5	Zinc transporter 1	SLC30A1	-2.38	0.000647871	0.72
P35568	P35568	Insulin receptor substrate 1	IRS1	-3.37	0.000653432	0.721
Q9Y617	Q9Y617	Phosphoserine aminotransferase	PSAT1	-2.85	0.000653786	0.721
O60701;E7ETF4;E7EV97;E7ER83;E7ER95;D6RHF4;E9PBD2	O60701	UDP-glucose 6-dehydrogenase	UGDH	-2.42	0.00065559	0.721
O43325;H3BNK2	O43325;H3BNK2	LYR motif-containing protein 1	LYRM1	-4.04	0.000656818	0.721
Q9NV35	Q9NV35	Probable 8-oxo-dGTP diphosphatase NUDT15	NUDT15	-4.1	0.000656864	0.721
J3KNF4;O14618;E9PP76;E9PK03	J3KNF4;O14618	Copper chaperone for superoxide dismutase	CCS	-2.28	0.000662793	0.722
Q6IQ49	Q6IQ49	Protein SDE2 homolog	SDE2	-3.19	0.000663827	0.722
Q58WW2;F2Z305	Q58WW2	DDB1- and CUL4-associated factor 6	DCAF6	-4.13	0.000668241	0.722
Q8N2F6;A0A0J9YWR7;A0A0J9YXE4;H7C2M7;H7BXQ8;C9J5N7;A0A0J9YY38;A0A0J9YXV5	Q8N2F6;A0A0J9YWR7;A0A0J9YXE4;H7C2M7;H7BXQ8	Armadillo repeat-containing protein 10	ARMC10	-4.47	0.000671906	0.723
Q969M3;E5RGR9;E5RHH4	Q969M3;E5RGR9;E5RHH4	Protein YIPF5;Protein YIPF	YIPF5	-5.92	0.000689053	0.725
E7END6;P04070;H7BYX9;E7ENR9	E7END6;P04070	Vitamin K-dependent protein C;Vitamin K-dependent protein C light chain;Vitamin K-dependent protein C heavy chain;Activation peptide	PROC	-3.45	0.000690289	0.725
Q17RC7;H0YNJ4;H0YNV0	Q17RC7	Exocyst complex component 3-like protein 4	EXOC3L4	-4.58	0.00069086	0.725
A0A7P0T8N5;H7BYL6;A0A7P0TAJ1;A0A7P0T9E2;A0A7P0T8Z8;A0A7P0TB09;A0A6I8PUD8;REV__A0A1X7SBS1;REV__A0A1W2PPS1;REV__Q00839	A0A7P0T8N5			-1.86	0.000695152	0.725
Q86WR0;G3V121;B7Z2L8;Q0VGD4	Q86WR0	Coiled-coil domain-containing protein 25	CCDC25	-2.12	0.000697945	0.725
Q6NZY4;F5H6J5;F5GX80;F5GYI9	Q6NZY4	Zinc finger CCHC domain-containing protein 8	ZCCHC8	-3.05	0.000698891	0.726
P46019	P46019	Phosphorylase b kinase regulatory subunit alpha, liver isoform	PHKA2	-2.7	0.000704023	0.726
P52895;B4DK69;S4R3P0	P52895;B4DK69;S4R3P0	Aldo-keto reductase family 1 member C2	AKR1C2	-2.81	0.000705058	0.726
Q8IYQ7	Q8IYQ7	Threonine synthase-like 1	THNSL1	-2.89	0.000710354	0.727
P41235;A0A087WXV4;A0A6E1WB48;Q14541	P41235;A0A087WXV4	Hepatocyte nuclear factor 4-alpha	HNF4A	-2.88	0.00071457	0.727
Q13608	Q13608	Peroxisome assembly factor 2	PEX6	-2.27	0.000714691	0.727
D6RF35;P02774;D6RBJ7;D6RF20	D6RF35;P02774;D6RBJ7	Vitamin D-binding protein	GC	-2.98	0.000729653	0.728
A0A7I2V2Y9;A0A7I2YQD7;B7Z2R7;A0A7I2YQE9;A0A7I2V2M2;A0A7I2V5E1;A0A7I2V420;A0A7I2V690;A0A7I2V5U2;A0A7I2V2R8;A0A087X0B8	A0A7I2V2Y9;A0A7I2YQD7;B7Z2R7;A0A7I2YQE9;A0A7I2V2M2;A0A7I2V5E1;A0A7I2V420;A0A7I2V690;A0A7I2V5U2	Acyl-CoA-binding domain-containing protein 5	ACBD5	-3.01	0.000734655	0.729
Q4G0F5;H0YCI7;A0A0D9SFQ6	Q4G0F5	Vacuolar protein sorting-associated protein 26B	VPS26B	-1.81	0.000736	0.729
Q99417;A0A087WV05;A0A0D9SEI7	Q99417;A0A087WV05	C-Myc-binding protein	MYCBP	-3.68	0.000737003	0.729
Q8WW12	Q8WW12	PEST proteolytic signal-containing nuclear protein	PCNP	-5.66	0.000741012	0.73
O43157;H7C0P4	O43157	Plexin-B1	PLXNB1	-2.31	0.000743228	0.73
P10620;F5H7F6;F5H6X2;F5GX73;F5H613;F5H760	P10620;F5H7F6;F5H6X2	Microsomal glutathione S-transferase 1	MGST1	-2.63	0.000753253	0.731
Q9UKK9;A6NFX8;A6NJU6;A6NCQ0;H0YEY4;C9JYY9	Q9UKK9;A6NFX8;A6NJU6;A6NCQ0	ADP-sugar pyrophosphatase	NUDT5	-2.03	0.000756548	0.731
P26927;G3XAK1;H7C0F8	P26927;G3XAK1	Hepatocyte growth factor-like protein;Hepatocyte growth factor-like protein alpha chain;Hepatocyte growth factor-like protein beta chain	MST1	-2.89	0.000762521	0.731
Q13423;A0A590UK15;A0A590UJM2;A0A590UK29;D6RAI5;D6RHU2;A0A590UJA4;A0A590UKC7	Q13423;A0A590UK15;A0A590UJM2;A0A590UK29	NAD(P) transhydrogenase, mitochondrial	NNT	-1.81	0.000763416	0.732
Q16719;A0A087X297;B8ZZA3;A0A087WYM2;A0A087WYQ7;F8WEP1	Q16719	Kynureninase	KYNU	-2.05	0.000771129	0.732
P30038;Q5TF55	P30038	Delta-1-pyrroline-5-carboxylate dehydrogenase, mitochondrial	ALDH4A1	-1.84	0.000779023	0.733
Q9NW68;E9PS77;E9PQA7;F8W6C6;E9PNA9	Q9NW68	BSD domain-containing protein 1	BSDC1	-2.75	0.000789581	0.734
A0A804DNR1;Q96GE6;A0A804D2Q3;H3BS46	A0A804DNR1;Q96GE6;A0A804D2Q3	Calmodulin-like protein 4	CALML4	-4.33	0.000793073	0.734
A0A2R8Y3M9;D6R9Z8	A0A2R8Y3M9			-4.09	0.000793657	0.734
P00747;Q5TEH5;A6PVI2	P00747	Plasminogen;Plasmin heavy chain A;Activation peptide;Angiostatin;Plasmin heavy chain A, short form;Plasmin light chain B	PLG	-2.87	0.000796489	0.734
P15374;A0A087WTB8;Q5TBK7	P15374;A0A087WTB8;Q5TBK7	Ubiquitin carboxyl-terminal hydrolase isozyme L3;Ubiquitin carboxyl-terminal hydrolase	UCHL3	-2.39	0.000806819	0.735
Q6NUM9;H7C3J0;H7BZ81;H7BZ16;H0YGU3	Q6NUM9;H7C3J0	All-trans-retinol 13,14-reductase	RETSAT	-1.76	0.00080795	0.735
Q9UEE9;H3BUV5;H3BUI4	Q9UEE9	Craniofacial development protein 1	CFDP1	-2.8	0.000823244	0.737
P49757;G3V3Z8;G3V3R1;G3V3M5;G3V4S6;G3V433	P49757;G3V3Z8	Protein numb homolog	NUMB	-2.88	0.000828011	0.737
Q9Y2W1;A0A3B3ITZ9	Q9Y2W1;A0A3B3ITZ9	Thyroid hormone receptor-associated protein 3	THRAP3	-2.56	0.000829685	0.737
O75934	O75934	Pre-mRNA-splicing factor SPF27	BCAS2	-2.64	0.000838299	0.738
Q96HC4;H0Y8Y3;A0A0D9SFR4;H0Y929;D6RAA1;A0A0D9SFW3;D6RGG6	Q96HC4	PDZ and LIM domain protein 5	PDLIM5	-1.64	0.000842238	0.738
Q9H6V9;B5MDU6;A0A0A0MSH6;B5MCU4;B5MCE2;B4DRG3;C9JUM0;D3YTH1;C9JHU6	Q9H6V9;B5MDU6;A0A0A0MSH6;B5MCU4	UPF0554 protein C2orf43	C2orf43;LDAH	-2.31	0.000845228	0.738
Q9BX66;A0A3B3IT56;A0A3B3IRR9;A0A3B3IRW8;Q5T925	Q9BX66	Sorbin and SH3 domain-containing protein 1	SORBS1	-2.84	0.000848485	0.738
Q8N128;G3V583;G3V3Z5	Q8N128;G3V583	Protein FAM177A1	FAM177A1	-3.62	0.000848546	0.738
sp|A031757|abysis_31757;sp|A063862|abysis_63862;sp|A031473|abysis_31473	sp|A031757|abysis_31757;sp|A063862|abysis_63862;sp|A031473|abysis_31473			-5.55	0.000852046	0.739
P13693;J3KPG2;Q5W0H4;A0A0B4J2C3;E9PJF7;H0YCX0;Q56UQ5;Q9HAU6	P13693;J3KPG2;Q5W0H4;A0A0B4J2C3;E9PJF7	Translationally-controlled tumor protein	TPT1	-2.7	0.000855824	0.739
O95487	O95487	Protein transport protein Sec24B	SEC24B	-1.82	0.000860508	0.739
Q8NE62;C9J7D8;C9JYW4	Q8NE62	Choline dehydrogenase, mitochondrial	CHDH	-2.87	0.000864624	0.74
U3KPU7;U3KQS2;O43826;U3KQL4	U3KPU7;U3KQS2;O43826	Glucose-6-phosphate translocase	SLC37A4	-3.43	0.000869114	0.74
A0A2R8Y5A6;A0A2R8YDM9;Q99700;A0A5F9ZHW5;A0A5F9ZHX3;A0A2R8Y7E6;H0YH87;A0A5F9ZI57;A0A2R8Y7P6;V9GY86;F8VQP2;A0A5F9ZHH4;F8WB06;F8W0B5;A0A5F9ZH85;F8VRK6;F8WB05;S4R3J6;A0A2R8Y6W7;A0A2R8YGV1	A0A2R8Y5A6;A0A2R8YDM9;Q99700;A0A5F9ZHW5;A0A5F9ZHX3;A0A2R8Y7E6;H0YH87;A0A5F9ZI57;A0A2R8Y7P6;V9GY86;F8VQP2;A0A5F9ZHH4;F8WB06;F8W0B5	Ataxin-2	ATXN2	-3.49	0.000872478	0.74
P50135	P50135	Histamine N-methyltransferase	HNMT	-1.91	0.000879999	0.741
O60884;A0A087WT48;I3L320	O60884	DnaJ homolog subfamily A member 2	DNAJA2	-2.03	0.000885459	0.741
Q9NYI0;E5RJ29;B4DKF8;E5RFG7;E5RH02;H0YC20;E5RJE4;H0YAQ7;E5RIH3	Q9NYI0;E5RJ29	PH and SEC7 domain-containing protein 3	PSD3	-2.44	0.000899756	0.742
A0A2R8YF49;A0A5F9ZH52;H0Y895;A5YM69;C9J591	A0A2R8YF49			-2.54	0.000903431	0.743
Q01415;B7ZAX5;H0YLL8;H0YLL3;H0YK30;H0YN31	Q01415;B7ZAX5	N-acetylgalactosamine kinase	GALK2	-2.45	0.00090712	0.743
Q86UT6;C9JLK8;C9JQE9;C9J0R6	Q86UT6	NLR family member X1	NLRX1	-2.36	0.000909347	0.743
O96007	O96007	Molybdopterin synthase catalytic subunit	MOCS2	-3.28	0.000923037	0.744
Q9H479	Q9H479	Fructosamine-3-kinase	FN3K	-1.82	0.000928629	0.744
P23508;D6REY2	P23508;D6REY2	Colorectal mutant cancer protein	MCC	-2.04	0.000957355	0.746
P13688;M0R2K4;M0R109;A0A087WYX0;A0A024R0K5;P06731	P13688	Carcinoembryonic antigen-related cell adhesion molecule 1	CEACAM1	-3.13	0.00096318	0.747
P23588;E7EX17;F8VX11;F8VP89;F8VSC7;F8W0K0;F8VYE9;F8VRU1	P23588;E7EX17;F8VX11	Eukaryotic translation initiation factor 4B	EIF4B	-2.49	0.0009761	0.747
P49591	P49591	Serine--tRNA ligase, cytoplasmic	SARS	-1.56	0.000989391	0.748
O95292;E5RK64	O95292	Vesicle-associated membrane protein-associated protein B/C	VAPB	-2.65	0.000996367	0.749
Q96CD2;H3BRQ0;H3BQB0;H3BSE3;H3BU34;H3BU63;H3BPW5	Q96CD2;H3BRQ0;H3BQB0;H3BSE3	Phosphopantothenoylcysteine decarboxylase	PPCDC	-2.54	0.000997637	0.749
P08910;H3BMT2;H3BUZ6;H3BN19	P08910	Abhydrolase domain-containing protein 2	ABHD2	-2.96	0.0010359	0.751
O00244;E5RIM7	O00244;E5RIM7	Copper transport protein ATOX1	ATOX1	-2.29	0.00103988	0.751
P83111;H0YNN5	P83111	Serine beta-lactamase-like protein LACTB, mitochondrial	LACTB	-1.55	0.00104535	0.752
P28330	P28330	Long-chain specific acyl-CoA dehydrogenase, mitochondrial	ACADL	-4.5	0.00104927	0.752
Q9HAV7	Q9HAV7	GrpE protein homolog 1, mitochondrial	GRPEL1	-3.42	0.00105087	0.752
Q9BV79;H3BM30	Q9BV79	Trans-2-enoyl-CoA reductase, mitochondrial	MECR	-2.11	0.00105332	0.752
P22760;C9K0E9;Q6P093	P22760	Arylacetamide deacetylase	AADAC	-2.5	0.0010577	0.752
Q99733;C9J6D1;E9PNJ7;E9PS34;E9PNW0;E9PJJ2;A8MXH2;E9PP22;E9PKI2;H0YCI4	Q99733;C9J6D1;E9PNJ7;E9PS34;E9PNW0;E9PJJ2;A8MXH2	Nucleosome assembly protein 1-like 4	NAP1L4	-2.18	0.00107768	0.754
H3BNC9;P08708	H3BNC9;P08708	40S ribosomal protein S17	RPS17	-1.98	0.00107898	0.754
Q13103	Q13103	Secreted phosphoprotein 24	SPP2	-3.74	0.00107993	0.754
P51659;E7EPL9;A0A804HK65;A0A2R8YD50;E7ET17;A0A804HKU2;A0A804HIR1;E7ER27;A0A2R8YDT8;A0A2R8YF45;A0A804HK88;A0A804HIG8;A0A804HKB5;A0A2R8Y7W2;A0A2R8YEG2;A0A804HKT2;A0A804HLJ0	P51659;E7EPL9;A0A804HK65;A0A2R8YD50;E7ET17;A0A804HKU2;A0A804HIR1;E7ER27	Peroxisomal multifunctional enzyme type 2;(3R)-hydroxyacyl-CoA dehydrogenase;Enoyl-CoA hydratase 2	HSD17B4	-1.39	0.00108564	0.754
Q14449;C9JD37;C9JLT6	Q14449;C9JD37	Growth factor receptor-bound protein 14	GRB14	-3.85	0.00108774	0.754
F5H1Z6;F5H8G1;F5H0V7;H0YFF3;H0YGA9;F5GWK5;H0YH17;F5H5A8;F5H3G8;F5GY07;H0YGN8	F5H1Z6;F5H8G1;F5H0V7;H0YFF3;H0YGA9		STARD10	-2.36	0.00108997	0.754
P40189;A0A494BZU0;D6RH03;Q5FC05	P40189;A0A494BZU0	Interleukin-6 receptor subunit beta	IL6ST	-2.49	0.00109696	0.755
Q99653;H0YNG9;H0YKE7;F5GX29;H0YLY7;H0YLX1	Q99653;H0YNG9;H0YKE7;F5GX29	Calcineurin B homologous protein 1	CHP1	-2.38	0.00111343	0.755
CON__H-INV:HIT000292931	CON__H-INV:HIT000292931			-4.45	0.00111702	0.756
Q9BTX7	Q9BTX7	Alpha-tocopherol transfer protein-like	TTPAL	-4.43	0.00113325	0.757
O95822;V9GYW3;V9GY18;A0A087X1B8	O95822	Malonyl-CoA decarboxylase, mitochondrial	MLYCD	-1.73	0.00116197	0.758
Q86W92;F5H495;F5H6Q7;F5H0E0	Q86W92	Liprin-beta-1	PPFIBP1	-2.02	0.0011692	0.758
Q8TEA1;U3KQU2	Q8TEA1	Putative methyltransferase NSUN6	NSUN6	-2.72	0.00118463	0.759
Q9NTG7;E9PK80;E9PM75;E9PN58;B7WNN4;E9PIT6;E9PJS6	Q9NTG7;E9PK80;E9PM75;E9PN58	NAD-dependent protein deacetylase sirtuin-3, mitochondrial	SIRT3	-3.04	0.00118508	0.759
P34931;Q53FA3	P34931;Q53FA3	Heat shock 70 kDa protein 1-like	HSPA1L	-3.88	0.00120348	0.76
Q5JPH6;H3BTB7	Q5JPH6;H3BTB7	Probable glutamate--tRNA ligase, mitochondrial	EARS2	-2.61	0.00120349	0.76
Q9BX68	Q9BX68	Histidine triad nucleotide-binding protein 2, mitochondrial	HINT2	-2.4	0.00122222	0.761
Q5R3B4;O95563	Q5R3B4;O95563	Mitochondrial pyruvate carrier 2	MPC2	-2.74	0.00124562	0.762
B1AK53;A0A0J9YWQ8;A0A1B0GUS9;H0Y7L4	B1AK53;A0A0J9YWQ8;A0A1B0GUS9;H0Y7L4	Espin	ESPN	-3.46	0.00125664	0.763
Q9Y5L4;K7EIT2	Q9Y5L4;K7EIT2	Mitochondrial import inner membrane translocase subunit Tim13	TIMM13	-2.13	0.00126267	0.763
P26232;A0A0A0MRI5;A0A0A0MTJ6;C9IZ88;B9A010;C9J144	P26232;A0A0A0MRI5	Catenin alpha-2	CTNNA2	-3.59	0.00126438	0.763
Q8N159;K7EK11	Q8N159;K7EK11	N-acetylglutamate synthase, mitochondrial;N-acetylglutamate synthase long form;N-acetylglutamate synthase short form;N-acetylglutamate synthase conserved domain form	NAGS	-3.17	0.00127028	0.763
Q9P2M7;A6PVU7;A2A3M4;H0Y4A8;REV__P35499	Q9P2M7	Cingulin	CGN	-2.37	0.00128581	0.764
P49790	P49790	Nuclear pore complex protein Nup153	NUP153	-3.26	0.00129115	0.764
Q9UIJ7	Q9UIJ7	GTP:AMP phosphotransferase AK3, mitochondrial	AK3	-2.15	0.00129728	0.765
Q7Z7K6	Q7Z7K6	Centromere protein V	CENPV	-3.78	0.00129757	0.765
Q9NZP8;H0YFL7;F5GWF3;F5H7C8;F5H6S5;H0YF87;H0YFJ9;F5H2Z5	Q9NZP8	Complement C1r subcomponent-like protein	C1RL	-3.19	0.0013081	0.765
Q9Y619;Q5VZD9;F2Z354;Q9BXI2	Q9Y619	Mitochondrial ornithine transporter 1	SLC25A15	-2.19	0.00131731	0.765
P13716	P13716	Delta-aminolevulinic acid dehydratase	ALAD	-2.37	0.00132423	0.766
P04217	P04217	Alpha-1B-glycoprotein	A1BG	-2.34	0.00132525	0.766
Q6P996;H3BND4;Q86XE2;J3KNK7;Q6P474;Q6XYB5;H3BNL6;A0A0J9YXH6;H3BPV5;H3BM88;H3BU11;H3BQ54;H3BQS3	Q6P996;H3BND4;Q86XE2	Pyridoxal-dependent decarboxylase domain-containing protein 1	PDXDC1	-1.57	0.00132769	0.766
Q4G0X4;E9PRT1;E9PJJ5;E9PMS5;E9PK99;E9PM10	Q4G0X4;E9PRT1;E9PJJ5;E9PMS5	BTB/POZ domain-containing protein KCTD21	KCTD21	-3.87	0.00134394	0.767
P98175	P98175	RNA-binding protein 10	RBM10	-2.11	0.00135442	0.767
A0A286YF22;O43175;A0A2C9F2M7;A0A286YFL2;A0A286YFA2;A0A286YFM8;A0A286YFC8;A0A286YFB2;A0A286YER3;A0A286YF34;A0A286YFF3;A0A286YFK5	A0A286YF22;O43175;A0A2C9F2M7;A0A286YFL2;A0A286YFA2;A0A286YFM8	D-3-phosphoglycerate dehydrogenase	PHGDH	-2.03	0.00136305	0.767
Q96S66;A0A6Q8PEZ7;A0A6Q8PHQ1;A0A6Q8PG30;A0A8I5KRC0;A0A6Q8PG14;A0A6Q8PG75;A0A6Q8PGA4;Q5T1P5;A0A6Q8PG68;A0A6Q8PFF7;A0A6Q8PF11;A0A8I5KXB0;A0A6Q8PFH1;A0A6Q8PFT6;A0A8I5KPC2;A0A8I5KXZ8	Q96S66;A0A6Q8PEZ7;A0A6Q8PHQ1;A0A6Q8PG30;A0A8I5KRC0;A0A6Q8PG14;A0A6Q8PG75;A0A6Q8PGA4;Q5T1P5;A0A6Q8PG68;A0A6Q8PFF7	Chloride channel CLIC-like protein 1	CLCC1	-3.05	0.00136388	0.767
Q15121	Q15121	Astrocytic phosphoprotein PEA-15	PEA15	-2.58	0.00136414	0.767
Q9Y6Y8;H7C0V8;H0YE64	Q9Y6Y8	SEC23-interacting protein	SEC23IP	-1.46	0.00136613	0.768
Q6GQQ9;Q5SZ59;H0YN66;H0YMI7	Q6GQQ9	OTU domain-containing protein 7B	OTUD7B	-1.91	0.00136692	0.768
Q9NX24;D6RC52;D6RCB9;J3QSY4;H0YC83	Q9NX24;D6RC52;D6RCB9	H/ACA ribonucleoprotein complex subunit 2	NHP2	-2.01	0.00137647	0.768
K7EQ55;K7EK33;Q96EP5;K7EQ02	K7EQ55;K7EK33;Q96EP5;K7EQ02	DAZ-associated protein 1	DAZAP1	-3.18	0.0013853	0.768
Q9H6U6;K7ESE9;K7EKB0;K7EJH7;K7EML5;K7EJU7	Q9H6U6;K7ESE9	Breast carcinoma-amplified sequence 3	BCAS3	-2.44	0.00139484	0.769
A0A0A0MQZ4;Q8N3J5;V9GY69;V9GYZ5;V9GYI6;V9GYS8	A0A0A0MQZ4;Q8N3J5	Protein phosphatase 1K, mitochondrial	PPM1K	-3.16	0.00139939	0.769
Q9Y3B3;A0A0A6YYA0;G3V2Y2	Q9Y3B3;A0A0A6YYA0	Transmembrane emp24 domain-containing protein 7	TMED7;TMED7-TICAM2	-2.35	0.00140368	0.769
O60907;A0A804HJZ5	O60907;A0A804HJZ5	F-box-like/WD repeat-containing protein TBL1X	TBL1X	-1.91	0.00142646	0.77
G3V1P3;Q969J3	G3V1P3;Q969J3	Loss of heterozygosity 12 chromosomal region 1 protein	LOH12CR1	-1.71	0.00144622	0.771
Q8NFQ8	Q8NFQ8	Torsin-1A-interacting protein 2	TOR1AIP2	-2.74	0.00144816	0.771
P61457	P61457	Pterin-4-alpha-carbinolamine dehydratase	PCBD1	-2.02	0.00145916	0.771
Q86X76	Q86X76	Nitrilase homolog 1	NIT1	-2.24	0.00147438	0.772
E9PS17;Q96KG9;E9PK59	E9PS17;Q96KG9;E9PK59	N-terminal kinase-like protein	SCYL1	-2.18	0.00148595	0.772
Q9UQN3;C9J0A7;A0A087WW88	Q9UQN3;C9J0A7;A0A087WW88	Charged multivesicular body protein 2b	CHMP2B	-3.47	0.0014862	0.772
Q9UDY4;C9JUL4	Q9UDY4;C9JUL4	DnaJ homolog subfamily B member 4	DNAJB4	-3.11	0.00151582	0.773
Q10713;Q5SXN9	Q10713	Mitochondrial-processing peptidase subunit alpha	PMPCA	-2.19	0.00152731	0.774
P47813;X6RAC9	P47813;X6RAC9	Eukaryotic translation initiation factor 1A, X-chromosomal	EIF1AX	-2.8	0.00154687	0.774
P0C0L5;F5GXS0;A0A3B3ISA6	P0C0L5;F5GXS0;A0A3B3ISA6	Complement C4-B;Complement C4 beta chain;Complement C4-B alpha chain;C4a anaphylatoxin;C4b-B;C4d-B;Complement C4 gamma chain	C4B	-1.48	0.00154948	0.775
O43933;A0A0C4DG33;H7BZH3	O43933;A0A0C4DG33	Peroxisome biogenesis factor 1	PEX1	-2.97	0.00155366	0.775
Q9Y237;H0Y4T6;J3KMW3;H0Y610;H0Y8P6;A0A494C021	Q9Y237	Peptidyl-prolyl cis-trans isomerase NIMA-interacting 4	PIN4	-1.84	0.00155877	0.775
Q9BZL4	Q9BZL4	Protein phosphatase 1 regulatory subunit 12C	PPP1R12C	-1.69	0.00158062	0.776
O14681;E9PM05;E9PS58;E9PK61;E9PL33;B7ZB74;E9PLB8;E9PQN7;A0A087WV44	O14681;E9PM05;E9PS58;E9PK61	Etoposide-induced protein 2.4 homolog	EI24	-2.97	0.00160696	0.777
Q8N5J2;H0YJH5	Q8N5J2	Protein FAM63A	FAM63A	-3.2	0.00160743	0.777
Q969Q0	Q969Q0	60S ribosomal protein L36a-like	RPL36AL	-2.14	0.0016084	0.777
I3L4C2;B4DWA1;I3L2M4;I3L3C6;I3L1C8;I3L327;I3L0Y9;I3L125;I3L3J7;I3L4A3;I3L526;I3L0M4;I3L2J6;I3L113	I3L4C2;B4DWA1		BAIAP2	-1.96	0.00160873	0.777
E9PDF6;O43795;E7EQD9;H7C2Y7;C9JYW1;C9JUP5;A0A0U1RRI3	E9PDF6;O43795	Unconventional myosin-Ib	MYO1B	-1.95	0.00161619	0.777
P51858	P51858	Hepatoma-derived growth factor	HDGF	-1.89	0.0016179	0.777
P10606	P10606	Cytochrome c oxidase subunit 5B, mitochondrial	COX5B	-2.39	0.00162231	0.777
P50548;M0QXN0;Q6ZN32;P41162	P50548	ETS domain-containing transcription factor ERF	ERF	-2.47	0.0016288	0.777
Q15738;C9JDR0	Q15738;C9JDR0	Sterol-4-alpha-carboxylate 3-dehydrogenase, decarboxylating	NSDHL	-1.99	0.00163919	0.778
Q96RP9;C9IZ01;F8WAU4;C9JA25	Q96RP9;C9IZ01;F8WAU4	Elongation factor G, mitochondrial	GFM1	-1.73	0.00163933	0.778
P15924;A0A804HL18	P15924	Desmoplakin	DSP	-1.55	0.00165078	0.778
Q9H1X3	Q9H1X3	DnaJ homolog subfamily C member 25	DNAJC25	-3.3	0.00165139	0.778
Q9NXD2;H3BUS9;H3BUZ0;H3BQR5;H3BQP4	Q9NXD2	Myotubularin-related protein 10	MTMR10	-2.35	0.00165855	0.778
O00519	O00519	Fatty-acid amide hydrolase 1	FAAH	-3.81	0.00165885	0.778
P41214;Q5SY38;A0A087X1L6	P41214	Eukaryotic translation initiation factor 2D	EIF2D	-3.38	0.00167008	0.779
P10646;C9JKV3;C9JT76;C9JQ14	P10646;C9JKV3;C9JT76;C9JQ14	Tissue factor pathway inhibitor	TFPI	-3.3	0.0016754	0.779
P35558	P35558	Phosphoenolpyruvate carboxykinase, cytosolic [GTP]	PCK1	-2.62	0.0016827	0.779
P49327;A0A0U1RQF0;A0A0U1RRG3;A0A1B0GTR5;J3KTF0	P49327;A0A0U1RQF0	Fatty acid synthase;[Acyl-carrier-protein] S-acetyltransferase;[Acyl-carrier-protein] S-malonyltransferase;3-oxoacyl-[acyl-carrier-protein] synthase;3-oxoacyl-[acyl-carrier-protein] reductase;3-hydroxyacyl-[acyl-carrier-protein] dehydratase;Enoyl-[acyl-carrier-protein] reductase;Oleoyl-[acyl-carrier-protein] hydrolase	FASN	-2.12	0.00169752	0.78
O43290;E9PQI8	O43290	U4/U6.U5 tri-snRNP-associated protein 1	SART1	-4.37	0.00170778	0.78
P78417;Q5TA01	P78417;Q5TA01	Glutathione S-transferase omega-1	GSTO1	-1.86	0.00171562	0.78
E9PCX7;A0A590UJI3;D6RCR6	E9PCX7;A0A590UJI3		NNT	-3.09	0.00174001	0.781
Q15293;E9PP27	Q15293	Reticulocalbin-1	RCN1	-1.78	0.00176032	0.781
A0A669KBH7;A0A669KB27;Q9UHQ4;C9JTE9;A0A669KAY5;B7Z2L0;H7C5E2;C9IYK6;H0Y7N8;F8WB99;C9JGJ9;C9JP06;F8WDG1	A0A669KBH7;A0A669KB27;Q9UHQ4;C9JTE9;A0A669KAY5;B7Z2L0;H7C5E2;C9IYK6;H0Y7N8	B-cell receptor-associated protein 29	BCAP29	-4.19	0.00177524	0.782
P00352;Q5SYQ9;Q5SYQ8	P00352	Retinal dehydrogenase 1	ALDH1A1	-2.05	0.00179104	0.782
A0A7I2V539;P30419;A0A7I2V3X4;A0A7I2V3U5;A0A7I2V4Y5;B7Z8J4;K7EN82;K7EN42;A0A7I2V3M5	A0A7I2V539;P30419;A0A7I2V3X4;A0A7I2V3U5	Glycylpeptide N-tetradecanoyltransferase 1	NMT1	-3.18	0.00181508	0.783
Q5VTI5;Q9Y2H5	Q5VTI5;Q9Y2H5	Pleckstrin homology domain-containing family A member 6	PLEKHA6	-2.04	0.00181688	0.783
O00483	O00483	Cytochrome c oxidase subunit NDUFA4	NDUFA4	-2.56	0.00181825	0.783
O15431	O15431	High affinity copper uptake protein 1	SLC31A1	-5.27	0.00181857	0.783
P14550;Q5T621;V9GYP9;V9GYG2	P14550	Alcohol dehydrogenase [NADP(+)]	AKR1A1	-1.77	0.00182135	0.783
Q14032;A0A6Q8PF60;A0A6Q8PHR9	Q14032;A0A6Q8PF60;A0A6Q8PHR9	Bile acid-CoA:amino acid N-acyltransferase	BAAT	-2.37	0.00182199	0.783
P18827;E9PHH3;H7C1K4	P18827	Syndecan-1	SDC1	-3.14	0.00183126	0.784
Q8NHZ8	Q8NHZ8	Anaphase-promoting complex subunit CDC26	CDC26	-3.39	0.00184047	0.784
Q5VWP3	Q5VWP3	Muscular LMNA-interacting protein	MLIP	-4.24	0.00184149	0.784
P61952;P63211	P61952	Guanine nucleotide-binding protein G(I)/G(S)/G(O) subunit gamma-11	GNG11	-3.19	0.00184932	0.784
Q9BSC4;H7C1Z3	Q9BSC4	Nucleolar protein 10	NOL10	-2.32	0.00185436	0.784
P37059;H3BS44;H3BRZ6;H3BNN1;H3BQY3;H3BV42	P37059;H3BS44	Estradiol 17-beta-dehydrogenase 2	HSD17B2	-2.36	0.00186214	0.784
K7ELC2;P62841;K7EQJ5;K7EJ78	K7ELC2;P62841;K7EQJ5;K7EJ78	40S ribosomal protein S15	RPS15	-2.99	0.00188315	0.785
Q86U17	Q86U17	Serpin A11	SERPINA11	-3.7	0.00191308	0.786
P56211;H3BMD8;H3BQ52;H3BTD3	P56211;H3BMD8;H3BQ52	cAMP-regulated phosphoprotein 19	ARPP19	-3.75	0.00191819	0.786
P08709;F5H8B0	P08709;F5H8B0	Coagulation factor VII;Factor VII light chain;Factor VII heavy chain	F7	-3.11	0.00192253	0.786
Q8IZE3	Q8IZE3	Protein-associating with the carboxyl-terminal domain of ezrin	SCYL3	-2.79	0.0019236	0.786
Q96F24	Q96F24	Nuclear receptor-binding factor 2	NRBF2	-1.67	0.00192525	0.786
Q9NPH0;A0A087WYU6;A0A0A0MS36;V9GZ71;A0A087WW36;A0A087WWB7	Q9NPH0;A0A087WYU6;A0A0A0MS36;V9GZ71	Lysophosphatidic acid phosphatase type 6	ACP6	-3.03	0.00196742	0.787
P30044	P30044	Peroxiredoxin-5, mitochondrial	PRDX5	-1.88	0.00197442	0.788
Q86YH6	Q86YH6	Decaprenyl-diphosphate synthase subunit 2	PDSS2	-2.76	0.0019776	0.788
Q9NQT8;E7ERX9;H0YBA8;F2Z2F9	Q9NQT8	Kinesin-like protein KIF13B	KIF13B	-1.47	0.001988	0.788
Q9Y5J7;A0A1W2PRH9;A0A1W2PQS5;G3V502;G3V2F3	Q9Y5J7;A0A1W2PRH9;A0A1W2PQS5;G3V502;G3V2F3	Mitochondrial import inner membrane translocase subunit Tim9	TIMM9	-2.45	0.00202853	0.789
A0A0A6YYH1;Q7Z6K5;H0YMP5;H0YL03;H0YL85;H0YMK0	A0A0A6YYH1;Q7Z6K5	Arpin	C15orf38-AP3S2;ARPIN	-3.36	0.00203708	0.789
O15027;A0A3F2YNX0;A0A3F2YNZ0;A0A0C4DH09	O15027;A0A3F2YNX0;A0A3F2YNZ0	Protein transport protein Sec16A	SEC16A	-2.13	0.0020381	0.789
P42025	P42025	Beta-centractin	ACTR1B	-3.38	0.00206925	0.79
O60610;A0A2R8Y5N1;B4E2I7;A0A2R8YEF8;H7C2W8	O60610;A0A2R8Y5N1	Protein diaphanous homolog 1	DIAPH1	-1.49	0.00206945	0.79
P56937;Q5T249;F2Z2C2;V9GYN3	P56937	3-keto-steroid reductase	HSD17B7	-2.72	0.0020784	0.79
O95445	O95445	Apolipoprotein M	APOM	-3.73	0.00211133	0.791
Q14678;A0A8I5KUI5;A0A8I5KXH8;A0A8I5QKT2;A0A8I5KP85;A0A8I5KTS9;Q5W0W2;Q5W0W3	Q14678;A0A8I5KUI5;A0A8I5KXH8;A0A8I5QKT2;A0A8I5KP85;A0A8I5KTS9	KN motif and ankyrin repeat domain-containing protein 1	KANK1	-2.16	0.00214213	0.792
P07148;A8MW49	P07148;A8MW49	Fatty acid-binding protein, liver	FABP1	-1.9	0.00215151	0.792
Q9H4F8	Q9H4F8	SPARC-related modular calcium-binding protein 1	SMOC1	-2.55	0.00215496	0.792
A0A024R4E5;Q00341;H0Y394;H7C0A4;C9JIZ1;H7C2D1;C9J5E5;H7BZC3;C9JZI8;C9JHZ8;C9JES8;C9JHS7;C9JK79;C9JT62;H7C3D0;C9JHN6;C9JEJ8;C9JBS3;C9JQ82;C9JMQ6;C9J739;C9JHS9	A0A024R4E5;Q00341;H0Y394	Vigilin	HDLBP	-1.53	0.0021712	0.792
Q9HAU0;A0JP02;B4DJX4;H0YGJ6;H0YG48;F5H1X3	Q9HAU0;A0JP02;B4DJX4	Pleckstrin homology domain-containing family A member 5	PLEKHA5	-3.69	0.00217713	0.792
P07237;A0A7P0TB26;A0A7P0TA71;A0A7P0TA35;A0A7P0TA97;A0A7P0T8X1;I3L3P5;A0A7P0T8J3;A0A7P0T8C0;A0A7P0T9K9;H7BZ94;I3L0S0;H0Y3Z3;B3KTQ9	P07237;A0A7P0TB26;A0A7P0TA71;A0A7P0TA35;A0A7P0TA97;A0A7P0T8X1;I3L3P5;A0A7P0T8J3;A0A7P0T8C0;A0A7P0T9K9;H7BZ94;I3L0S0;H0Y3Z3	Protein disulfide-isomerase	P4HB	-1.64	0.00218112	0.793
Q8N108	Q8N108	Mesoderm induction early response protein 1	MIER1	-2.15	0.00218911	0.793
Q5BKZ1;A0A0A0MRN4;E2QRN4	Q5BKZ1;A0A0A0MRN4	DBIRD complex subunit ZNF326	ZNF326	-2.43	0.00219072	0.793
P13667	P13667	Protein disulfide-isomerase A4	PDIA4	-1.26	0.00221474	0.793
Q9UBI1;R4GMW6;H0Y4W0;R4GN54;H0Y4E5;R4GN06;R4GNF2;Q5T8Z1	Q9UBI1;R4GMW6;H0Y4W0	COMM domain-containing protein 3	COMMD3;COMMD3-BMI1	-2.58	0.00222434	0.794
P49755;G3V2K7	P49755;G3V2K7	Transmembrane emp24 domain-containing protein 10	TMED10	-1.69	0.00223383	0.794
F5H7W8;Q96C57;F5H3K2;E7ENF1;G5EA44;F5H8B7	F5H7W8;Q96C57;F5H3K2;E7ENF1;G5EA44;F5H8B7	Uncharacterized protein C12orf43	C12orf43	-2.71	0.00226361	0.794
Q9HC78;C9JCX0;M0QZ57;Q96K62	Q9HC78	Zinc finger and BTB domain-containing protein 20	ZBTB20	-2.82	0.00227339	0.795
P05543	P05543	Thyroxine-binding globulin	SERPINA7	-1.95	0.00228144	0.795
F8VY35;F8W0J6;F5H4R6;P55209;H0YIV4;F8W020;F8VUX1;H0YHC3;F8VXI6;F8VVB5;H0YH88;B7Z4K9	F8VY35;F8W0J6;F5H4R6;P55209;H0YIV4;F8W020;F8VUX1;H0YHC3;F8VXI6;F8VVB5;H0YH88	Nucleosome assembly protein 1-like 1	NAP1L1	-2.53	0.00228439	0.795
Q5HYI8;C9JXM3;F8WF50;F8WDC7;H7C533;F8WAX9	Q5HYI8;C9JXM3;F8WF50;F8WDC7	Rab-like protein 3	RABL3	-2.95	0.00229498	0.795
Q9BW91;D6RAW2;H7C386;D6R8Z6	Q9BW91;D6RAW2;H7C386	ADP-ribose pyrophosphatase, mitochondrial	NUDT9	-1.79	0.00230139	0.795
Q6P161	Q6P161	39S ribosomal protein L54, mitochondrial	MRPL54	-3.73	0.00230794	0.795
A0A8I5QJL1;Q13496;A0A8I5KZ76;A0A8I5QJV9;A0A8I5KRS4;A0A8I5KW93;B7Z499;A0A8I5KQR6;A0A8I5KVB1;A0A8I5KZ85;A0A8I5KNI6;A0A8I5KT87;A0A8I5KYJ1;A0A8I5KVR9;A0A8I5KYA6	A0A8I5QJL1;Q13496;A0A8I5KZ76;A0A8I5QJV9;A0A8I5KRS4;A0A8I5KW93;B7Z499;A0A8I5KQR6	Myotubularin	MTM1	-1.81	0.00231381	0.796
Q9P2E9;A2A2S5;V9GY78	Q9P2E9	Ribosome-binding protein 1	RRBP1	-1.49	0.00231665	0.796
Q9H936;E9PJH7;A0A0D9SFE1;A0A0D9SEI9;K4DIA8;K4DIB8;E9PS95;K4DIB3;K4DIB6;E9PQ36;E9PI74;A0A0D9SG84;K4DIA2;K4DIB0;A0A0D9SFA8;E9PJY0;A0A0A6YYN8;K4DIB4	Q9H936;E9PJH7;A0A0D9SFE1;A0A0D9SEI9;K4DIA8;K4DIB8;E9PS95	Mitochondrial glutamate carrier 1	SLC25A22	-2.52	0.00232509	0.796
A0A0G2JMZ8;Q16625;A0A7P0T9T6;A0A0G2JPF2;A0A7P0TB95	A0A0G2JMZ8;Q16625	Occludin	OCLN	-2.39	0.00238139	0.797
Q13057;K7EN91;K7EQ60;K7ES73;K7ESK6;K7EP09;K7EPT0;K7EPC2	Q13057	Bifunctional coenzyme A synthase;Phosphopantetheine adenylyltransferase;Dephospho-CoA kinase	COASY	-1.48	0.00239732	0.797
Q9UNZ2;F2Z2K0;R4GNE6;G3V4V8;R4GMY2	Q9UNZ2;F2Z2K0	NSFL1 cofactor p47	NSFL1C	-1.32	0.00239848	0.797
O60551;Q5VUC6	O60551;Q5VUC6	Glycylpeptide N-tetradecanoyltransferase 2;Glycylpeptide N-tetradecanoyltransferase	NMT2	-1.81	0.00240771	0.797
O43677;A0A6Q8PHK7	O43677	NADH dehydrogenase [ubiquinone] 1 subunit C1, mitochondrial	NDUFC1	-4.22	0.00240937	0.797
Q9UMX3	Q9UMX3	Bcl-2-related ovarian killer protein	BOK	-3.49	0.0024537	0.798
E9PAM4	E9PAM4			-3.48	0.00245398	0.798
O75208;H3BNT2;H3BSJ5;H3BPY0;H3BPC6;H3BRC0;H3BPW3;H3BVA5	O75208;H3BNT2;H3BSJ5;H3BPY0	Ubiquinone biosynthesis protein COQ9, mitochondrial	COQ9	-1.76	0.00247831	0.799
P49756;E9PQU5;H0YE46;E9PSE8	P49756	RNA-binding protein 25	RBM25	-2.63	0.00248955	0.799
O15091;A0A0A0MTQ0	O15091	Mitochondrial ribonuclease P protein 3	KIAA0391	-3.33	0.0025032	0.799
P50748;E7ES84;F5H5V0	P50748	Kinetochore-associated protein 1	KNTC1	-5.23	0.00250724	0.799
Q9H446;E5RGQ3;E5RGS5;E5RJE3	Q9H446;E5RGQ3	RWD domain-containing protein 1	RWDD1	-2.14	0.00251179	0.8
O00757	O00757	Fructose-1,6-bisphosphatase isozyme 2	FBP2	-3.75	0.0025237	0.8
P13929;E5RGZ4;K7EPM1;K7EKN2	P13929;E5RGZ4	Beta-enolase;Enolase	ENO3	-3.83	0.00260528	0.801
Q9H307;G3V5F0;G3V579	Q9H307	Pinin	PNN	-3.24	0.00262194	0.802
O15120	O15120	1-acyl-sn-glycerol-3-phosphate acyltransferase beta	AGPAT2	-3.31	0.00263591	0.802
P0DMN0;P0DMM9;A0A0A6YYL2;H3BPL6;H3BNY7;H3BRT0	P0DMN0;P0DMM9;A0A0A6YYL2	Sulfotransferase 1A4;Sulfotransferase 1A3;Sulfotransferase	SULT1A4;SULT1A3	-3.67	0.00272804	0.803
Q7Z6M1;Q5T1S4;Q5T1S5	Q7Z6M1	Rab9 effector protein with kelch motifs	RABEPK	-2.81	0.00272998	0.803
P32754	P32754	4-hydroxyphenylpyruvate dioxygenase	HPD	-2.28	0.00273327	0.804
A0A7I2YQI1;A0A7I2V395;A0A7I2V2G1;A0A7I2YQD2;A0A7I2V552	A0A7I2YQI1;A0A7I2V395;A0A7I2V2G1;A0A7I2YQD2;A0A7I2V552			-2.57	0.00274113	0.804
P51911;B7Z7E1;K7ER02;K7EQ72;K7ENC5;K7ESJ2;K7ERM8	P51911;B7Z7E1	Calponin-1;Calponin	CNN1	-3.84	0.00274279	0.804
Q5T440	Q5T440	Putative transferase CAF17, mitochondrial	IBA57	-1.62	0.00274333	0.804
P42336;A0A2R8Y2F6;A0A6Q8PGN9;A0A6Q8PGV1;C9JAM9	P42336;A0A2R8Y2F6;A0A6Q8PGN9	Phosphatidylinositol 4,5-bisphosphate 3-kinase catalytic subunit alpha isoform	PIK3CA	-2.42	0.00274751	0.804
Q9NZ01;M0R2N5;M0R3C3;M0R329	Q9NZ01;M0R2N5	Very-long-chain enoyl-CoA reductase	TECR	-2.17	0.00277203	0.804
Q96EY1;I3L1T6	Q96EY1	DnaJ homolog subfamily A member 3, mitochondrial	DNAJA3	-1.67	0.00277428	0.804
Q8N129;A0A0J9YYJ0;A0A0J9YXE1	Q8N129;A0A0J9YYJ0	Protein canopy homolog 4	CNPY4	-2.24	0.00278204	0.804
I3L2L5;I3L4Q0;C9JLW8;I3L317;I3L3A7	I3L2L5;I3L4Q0;C9JLW8;I3L317	Protein FAM195B	FAM195B	-4.24	0.00278632	0.804
P38117;M0QY67	P38117;M0QY67	Electron transfer flavoprotein subunit beta	ETFB	-1.56	0.00278634	0.804
Q9H061;E9PI90;E9PIH8	Q9H061	Transmembrane protein 126A	TMEM126A	-3.22	0.00280972	0.805
Q96A49	Q96A49	Synapse-associated protein 1	SYAP1	-3.02	0.00284238	0.805
Q8IUC4;A8MT19;K7EL35	Q8IUC4	Rhophilin-2	RHPN2	-2.77	0.00286585	0.806
O00764;F2Z2Y4;A8MV33	O00764;F2Z2Y4	Pyridoxal kinase	PDXK	-1.49	0.00289163	0.806
Q8N5M9;A0A3B3ITE9	Q8N5M9	Protein jagunal homolog 1	JAGN1	-4.65	0.00291531	0.807
P04798;E7EMT5;A4F3V8	P04798;E7EMT5;A4F3V8	Cytochrome P450 1A1;Cytochrome P450	CYP1A1	-4.81	0.00293537	0.807
P23526	P23526	Adenosylhomocysteinase	AHCY	-1.64	0.00294465	0.807
O95169;E9PQ68;K9J7I2;E9PIZ8	O95169;E9PQ68;K9J7I2	NADH dehydrogenase [ubiquinone] 1 beta subcomplex subunit 8, mitochondrial	NDUFB8	-2.16	0.00295196	0.807
P49750;H0YIQ2;F8VU51;H0YI23;U3KQT9	P49750;H0YIQ2;F8VU51	YLP motif-containing protein 1	YLPM1	-3.64	0.00297377	0.807
Q9HA65;M0R2L2;M0QYC9;M0QXA2	Q9HA65;M0R2L2	TBC1 domain family member 17	TBC1D17	-2.27	0.00297525	0.807
Q96I15;H7C4A1;C9JNL5;F8WCL3;F8WBU3	Q96I15	Selenocysteine lyase	SCLY	-2.1	0.00306229	0.809
P18583;J3QSZ5	P18583	Protein SON	SON	-2.57	0.00310134	0.809
A0A087X0M4;Q9BWU0;A0A087WWF4;H7C256	A0A087X0M4;Q9BWU0	Kanadaptin	SLC4A1AP	-2.39	0.00313748	0.81
A0A3B3ISR2;B4DPQ0;F5H2D0;P00736;A0A3B3ITU4;F5H1V0;F5H6Y3;F5H3N3;F5H3A3;F5H1N6;F5GWL0	A0A3B3ISR2;B4DPQ0;F5H2D0;P00736;A0A3B3ITU4	Complement C1r subcomponent;Complement C1r subcomponent heavy chain;Complement C1r subcomponent light chain	C1R	-1.96	0.00317762	0.81
P62736;F6UVQ4;F6QUT6;C9JFL5;F8WB63;B8ZZJ2	P62736	Actin, aortic smooth muscle	ACTA2	-4.89	0.00319033	0.811
Q5T3F8;H3BLW6;H0YCP6;E9PNG1	Q5T3F8;H3BLW6;H0YCP6	CSC1-like protein 2	TMEM63B	-4.54	0.00322919	0.811
A0A8I5KWQ7;O00522;C9JD81;A0A3B3ITR4;A0A8I5KUF9;A0A8I5KW41;C9J718;C9JIY2;H7C0D0;C9JF32;A0A8I5KQD8;A0A8I5KQH3;A0A0C4DG23;A0A8I5KVW5;A0A8I5KX77;A0A8I5KWG2;A0A8I5KVY1;C9JEW7;A0A8I5KRK7;A0A8I5KVY4;C9JJM9;C9JXI9;C9IYR8	A0A8I5KWQ7			-1.56	0.00323329	0.811
H0YJ03	H0YJ03		PSMA3	-3.32	0.00325021	0.811
Q9H8Y8;F8WF79;F8WEG2;F8WEH9;F8WBR9	Q9H8Y8	Golgi reassembly-stacking protein 2	GORASP2	-2.28	0.00327222	0.812
O00422;H7BZW6;U3KPY7;U3KQ12	O00422;H7BZW6	Histone deacetylase complex subunit SAP18	SAP18	-2.06	0.0032779	0.812
Q9BRT3;J3KTI2	Q9BRT3;J3KTI2	Migration and invasion enhancer 1	MIEN1	-2.23	0.00332325	0.812
Q6PID6;A0A1B0GU95;A0A1B0GV67;A0A1B0GUJ4	Q6PID6;A0A1B0GU95;A0A1B0GV67;A0A1B0GUJ4	Tetratricopeptide repeat protein 33	TTC33	-5.92	0.00335066	0.813
O94905;E5RHW4;E5RJ09	O94905;E5RHW4	Erlin-2	ERLIN2	-1.56	0.0033692	0.813
P46934;H0Y8X6	P46934;H0Y8X6	E3 ubiquitin-protein ligase NEDD4	NEDD4	-2.65	0.00341392	0.814
P16152	P16152	Carbonyl reductase [NADPH] 1	CBR1	-1.51	0.00345099	0.814
A0A7P0T938;Q2LD37;A0A8I5KWC0;A0A8I5KQV3;H3BLT5;H0Y781;A0A8I5KRW6;H7C070;H7C0G8;A0A8I5KWM3	A0A7P0T938;Q2LD37;A0A8I5KWC0	Uncharacterized protein KIAA1109	KIAA1109	-3.51	0.00349038	0.815
Q9BQS8;C9J2W6;H7BZ74	Q9BQS8	FYVE and coiled-coil domain-containing protein 1	FYCO1	-2.18	0.0035113	0.815
Q5SZR4;Q9Y2W6;E9PKN8;B7ZAG4;E9PQX4	Q5SZR4;Q9Y2W6	Tudor and KH domain-containing protein	TDRKH	-2.74	0.00352178	0.815
P17029;E9PC66;B3KRF7;C9JRM9;I3L4J6;Q9UNY5	P17029;E9PC66;B3KRF7	Zinc finger protein with KRAB and SCAN domains 1	ZKSCAN1	-2.24	0.00355752	0.816
Q9BRX8	Q9BRX8	Redox-regulatory protein FAM213A	FAM213A	-1.92	0.00356424	0.816
Q16698;E5RFV2;E5RJG7;E5RID6;H0YAW3	Q16698;E5RFV2;E5RJG7	2,4-dienoyl-CoA reductase, mitochondrial	DECR1	-1.84	0.00357147	0.816
A0A669KB69;Q6Q788	A0A669KB69;Q6Q788	Apolipoprotein A-V	APOA5	-3.66	0.00358096	0.816
Q9HAV0;A0A6Q8PFE0;A0A6Q8PFV8;H7C5J5;A0A6Q8PFW8;A0A6Q8PG88;C9JD14	Q9HAV0;A0A6Q8PFE0;A0A6Q8PFV8;H7C5J5;A0A6Q8PFW8;A0A6Q8PG88	Guanine nucleotide-binding protein subunit beta-4	GNB4	-1.44	0.00361178	0.816
Q13505;H0Y6Y5	Q13505	Metaxin-1	MTX1	-2.16	0.00362033	0.816
Q92597;A0A7I2ST14;E7ESM1;E5RIM2;E5RGM5;E5RIR1;A0A6Q8PF16;E5RIV1;E5RI76;A0A6Q8PHI0;E5RJY1;E5RH82;E5RK17;E5RJ98;A0A6Q8PGD3;A0A6Q8PHF2;A0A6Q8PF71;A0A6Q8PGJ1;E5RG99;A0A6Q8PFR8	Q92597;A0A7I2ST14	Protein NDRG1	NDRG1	-1.84	0.00362851	0.816
Q8N6H7;G5E9L0;A0A0D9SF70;E9PQP3;E9PIY6;E9PMU9;H0YDN9;E9PN48;E9PK28;E9PJT7;E9PMR9;E9PM63;H0YDX1;E9PNY8;H0YF45;E9PM18	Q8N6H7;G5E9L0;A0A0D9SF70;E9PQP3;E9PIY6;E9PMU9	ADP-ribosylation factor GTPase-activating protein 2	ARFGAP2	-1.64	0.00366261	0.817
Q676U5;E7EVC7;C9J1B2;C9J8C6;C9JAY7;C9JK97	Q676U5;E7EVC7	Autophagy-related protein 16-1	ATG16L1	-1.88	0.00366297	0.817
Q9H488	Q9H488	GDP-fucose protein O-fucosyltransferase 1	POFUT1	-2.42	0.00367383	0.817
P32320	P32320	Cytidine deaminase	CDA	-2.91	0.00367539	0.817
P15104;A0A2R8YDT1	P15104;A0A2R8YDT1	Glutamine synthetase	GLUL	-1.95	0.00369727	0.817
O94887;C9JWM9;C9JVQ5;H7C3E4;H7C447;H7C210	O94887	FERM, RhoGEF and pleckstrin domain-containing protein 2	FARP2	-2.88	0.00371547	0.817
Q9Y316;B5MCI6	Q9Y316	Protein MEMO1	MEMO1	-3.16	0.00372096	0.817
Q13085;Q59FY4;A0A0C4DGT1;A0A087WWN5;A0A087X0W4;A0A087WYK6;A0A087X2F8;A0A087X126;A0A087WVR6;A0A087WYS8	Q13085	Acetyl-CoA carboxylase 1;Biotin carboxylase	ACACA	-1.76	0.00373896	0.818
Q13148;A0A087WYY0;A0A087X260;G3V162;B1AKP7;A0A0A0N0M3;K7EN94;A0A087WX29;K7EJM5;A0A087WV68;A0A087WXQ5;A0A087WXV3;A0A087WX67;A0A087WW61;A0A087WZC9;A0A087WZM1;A0A087WYE7;A0A0A0MSV7;K7EJ99;K7EL26;A0A087WTZ4	Q13148;A0A087WYY0;A0A087X260;G3V162;B1AKP7;A0A0A0N0M3;K7EN94;A0A087WX29;K7EJM5;A0A087WV68;A0A087WXQ5	TAR DNA-binding protein 43	TARDBP;TDP43	-3.43	0.00374335	0.818
Q9HC36;I3L0T6;I3L443	Q9HC36	rRNA methyltransferase 3, mitochondrial	RNMTL1	-2.72	0.00375609	0.818
Q9NPJ3	Q9NPJ3	Acyl-coenzyme A thioesterase 13;Acyl-coenzyme A thioesterase 13, N-terminally processed	ACOT13	-1.39	0.00375951	0.818
A0A0G2JN29;Q15155;A0A0G2JP90;A0A7I2V686;H3BUC9;A0A7I2V2V8;I3L0Q6;H3BTW1	A0A0G2JN29;Q15155;A0A0G2JP90	Nodal modulator 1	NOMO1	-2.24	0.00378432	0.818
Q9H9J2	Q9H9J2	39S ribosomal protein L44, mitochondrial	MRPL44	-3.16	0.0037916	0.818
Q8WWM7;H3BUF6;H3BSK9;H3BUE3;H3BSQ5;H3BRB0;A0A0C4DGL7	Q8WWM7;H3BUF6	Ataxin-2-like protein	ATXN2L	-2.45	0.00380305	0.818
Q8NB49;A0A804HIW2;A0A067XG54;H7C0E8	Q8NB49;A0A804HIW2;A0A067XG54	Phospholipid-transporting ATPase IG;Phospholipid-transporting ATPase	ATP11C	-2.38	0.00383168	0.819
Q86YJ6;A8K0C1;C9JU10;C9J3J1	Q86YJ6;A8K0C1;C9JU10	Threonine synthase-like 2	THNSL2	-2.25	0.00385209	0.819
Q9HB21;Q5RGS4;R4GMZ9	Q9HB21;Q5RGS4	Pleckstrin homology domain-containing family A member 1	PLEKHA1	-2.09	0.00385794	0.819
O14562;H3BRL3;H3BUM8	O14562;H3BRL3;H3BUM8	Ubiquitin domain-containing protein UBFD1	UBFD1	-2.4	0.00392569	0.82
A0A087WZA9;A0A024R4K9;A0A087X266;Q9BXJ8;A0A087WZF4;A0A087WV11	A0A087WZA9;A0A024R4K9;A0A087X266;Q9BXJ8	Transmembrane protein 120A	TMEM120A;TMPIT	-3.73	0.0039365	0.82
Q9BXJ7;H0YMX8;H0YKJ5	Q9BXJ7	Protein amnionless	AMN	-2.97	0.00393863	0.82
P37268;E9PNM1;A0A1W2PQ47;E9PJG4;E9PS69;E9PQ90;E9PNJ2;E9PSH1	P37268;E9PNM1;A0A1W2PQ47	Squalene synthase	FDFT1	-2.9	0.00394628	0.82
O00233;J3KN29;F5H5V4;F5GX23;F5H7X1;F5H169	O00233;J3KN29;F5H5V4;F5GX23;F5H7X1	26S proteasome non-ATPase regulatory subunit 9	PSMD9	-1.76	0.00395735	0.82
P21964;A0A7I2V370;E7EMS6;E7EUU8;A0A7I2V3G7;H7BZ45	P21964;A0A7I2V370;E7EMS6;E7EUU8;A0A7I2V3G7;H7BZ45	Catechol O-methyltransferase	COMT	-2.51	0.00396484	0.82
Q15126	Q15126	Phosphomevalonate kinase	PMVK	-1.82	0.00398086	0.82
E9PF19;Q9Y4P3;A0A087WXC6;F8WDI9;F8WCR3	E9PF19;Q9Y4P3	Transducin beta-like protein 2	TBL2	-1.4	0.00400859	0.821
Q8N1G4;J3KRP5	Q8N1G4	Leucine-rich repeat-containing protein 47	LRRC47	-1.55	0.00403418	0.821
Q9Y2B0;H0YI18	Q9Y2B0	Protein canopy homolog 2	CNPY2	-1.35	0.0040867	0.821
Q96GW9	Q96GW9	Methionine--tRNA ligase, mitochondrial	MARS2	-2.86	0.00413508	0.822
P31512	P31512	Dimethylaniline monooxygenase [N-oxide-forming] 4	FMO4	-2.37	0.00419846	0.823
P60891;B1ALA9;A0A2R8Y7H4;A0A6Q8PGP2;A0A6Q8PHI4;A0A6Q8PHK9;B1ALA7;A0A6Q8PEU0;A0A6Q8PG82;Q15244;A0A6Q8PGF9;A0A0A0MRQ9;A0A6Q8PG13;A0A6Q8PGX9;A0A6Q8PFD7;A0A6Q8PFD1	P60891;B1ALA9;A0A2R8Y7H4	Ribose-phosphate pyrophosphokinase 1	PRPS1	-2.36	0.00422203	0.823
Q9BW92;U3KQG0;U3KQ50;Q5T5E9	Q9BW92;U3KQG0	Threonine--tRNA ligase, mitochondrial	TARS2	-2.31	0.0042485	0.823
O60927;Q5SRK2	O60927;Q5SRK2	Protein phosphatase 1 regulatory subunit 11	PPP1R11	-4.61	0.00426177	0.823
P00918;E5RID5;E5RK37	P00918	Carbonic anhydrase 2	CA2	-1.59	0.00426264	0.823
Q8N5M1;C9J2Q2;K7ELC1	Q8N5M1;C9J2Q2	ATP synthase mitochondrial F1 complex assembly factor 2	ATPAF2	-2.09	0.00426569	0.823
Q5QPM7;Q92530;Q5QPM9;H0Y555;F5H4Z3	Q5QPM7;Q92530;Q5QPM9	Proteasome inhibitor PI31 subunit	PSMF1	-2.49	0.00427728	0.823
Q96QZ7;H7C4U7;H7C535	Q96QZ7;H7C4U7;H7C535	Membrane-associated guanylate kinase, WW and PDZ domain-containing protein 1	MAGI1	-2.35	0.00428992	0.823
P29353;X6R6D0;H0Y539;Q5T188;Q5T182;Q5T181;Q5T187	P29353;X6R6D0;H0Y539	SHC-transforming protein 1	SHC1	-2.19	0.00436225	0.824
A0A5K1VW60;Q99766;G3V467;A0A8I5KUF2;A0A5F9ZGZ2;A0A5K1VW82	A0A5K1VW60;Q99766;G3V467	ATP synthase subunit s, mitochondrial	ATP5S	-1.93	0.00437109	0.824
Q14011	Q14011	Cold-inducible RNA-binding protein	CIRBP	-3.37	0.00437833	0.824
P50579;G3V1U3;F8VSC4	P50579;G3V1U3	Methionine aminopeptidase 2	METAP2	-2.22	0.00438795	0.824
A0A590UKC3;Q9UF12;K7EJK5;S4R3D8	A0A590UKC3;Q9UF12	Probable proline dehydrogenase 2	PRODH2	-2.29	0.00439583	0.824
K7EIU8;Q13485;A0A087WUF3;K7ES96;K7EIJ2;K7EL18;K7EL15;K7ENG1;K7ELK2	K7EIU8;Q13485;A0A087WUF3;K7ES96;K7EIJ2	Mothers against decapentaplegic homolog;Mothers against decapentaplegic homolog 4	SMAD4	-1.96	0.00439984	0.825
P48651;J3KNR6	P48651	Phosphatidylserine synthase 1	PTDSS1	-2.3	0.00447018	0.825
Q9HBR0;H0YF92;I3L0Q8;F5H3T4	Q9HBR0	Putative sodium-coupled neutral amino acid transporter 10	SLC38A10	-3.35	0.00448027	0.825
O95479	O95479	GDH/6PGL endoplasmic bifunctional protein;Glucose 1-dehydrogenase;6-phosphogluconolactonase	H6PD	-1.61	0.00450095	0.825
Q96DC8;Q5W0J6;Q5W0J8;Q6BEB4	Q96DC8;Q5W0J6	Enoyl-CoA hydratase domain-containing protein 3, mitochondrial	ECHDC3	-2.43	0.00451634	0.826
Q9H5Q4	Q9H5Q4	Dimethyladenosine transferase 2, mitochondrial	TFB2M	-2.1	0.00458977	0.826
P62310;REV__Q9Y4P9	P62310	U6 snRNA-associated Sm-like protein LSm3	LSM3	-2.21	0.00459223	0.826
P00533;E9PFD7;Q504U8;C9JYS6	P00533;E9PFD7;Q504U8	Epidermal growth factor receptor;Receptor protein-tyrosine kinase	EGFR	-2.1	0.00460694	0.826
Q01581;D6RIW1	Q01581	Hydroxymethylglutaryl-CoA synthase, cytoplasmic	HMGCS1	-3.02	0.00462847	0.827
O95218	O95218	Zinc finger Ran-binding domain-containing protein 2	ZRANB2	-3.82	0.00465151	0.827
O60240;H0YM16	O60240	Perilipin-1	PLIN1	-4.91	0.00466851	0.827
Q96IZ0;H0YI16;H0YHP5;F8W1M8	Q96IZ0	PRKC apoptosis WT1 regulator protein	PAWR	-2.87	0.00475681	0.828
A0A0J9YXF2;Q15165;G3XAK4;A0A0J9YXU7;A0A0J9YYJ1;A0A2Q2SAK4;A0A0J9YYF0;A0A0J9YYF3;A0A0J9YXM1	A0A0J9YXF2;Q15165;G3XAK4	Serum paraoxonase/arylesterase 2	PON2	-2	0.00475855	0.828
Q9Y5K6	Q9Y5K6	CD2-associated protein	CD2AP	-1.56	0.00476156	0.828
Q8WVJ2;E5RFP0	Q8WVJ2;E5RFP0	NudC domain-containing protein 2	NUDCD2	-1.98	0.00477872	0.828
B4E0T2;P50542;F5H3X7;F5H432;F5GXX3;F5H205;F5GYB4;F5H637;F5GZ41;F5H0L9;H0YGT8	B4E0T2;P50542	Peroxisomal targeting signal 1 receptor	PEX5	-1.42	0.00478411	0.828
P04792;A0A6Q8PFK8;A0A6Q8PHJ6;A0A6Q8PGK1;A0A6Q8PFE7;A0A6Q8PF43;A0A6Q8PH65;A0A6Q8PGY2;C9J3N8	P04792;A0A6Q8PFK8;A0A6Q8PHJ6;A0A6Q8PGK1	Heat shock protein beta-1	HSPB1	-1.4	0.00486176	0.829
Q9Y6D0;F8WAX7	Q9Y6D0;F8WAX7	Selenoprotein K	SELK	-2.89	0.00487048	0.829
A0A2R8Y7L2;A0A2R8YF39;Q9UJQ7	A0A2R8Y7L2			-2.21	0.00488007	0.829
Q9BQ70;H3BQ53;H3BSP8;H3BTU3;H3BMJ8;H3BSS3;Q9H384;H3BR53;H3BRP4	Q9BQ70;H3BQ53;H3BSP8;H3BTU3	Transcription factor 25	TCF25	-1.97	0.00488542	0.829
O75477;B0QZ43	O75477;B0QZ43	Erlin-1	ERLIN1	-2.19	0.00497551	0.83
P53041;H0YDU8;A8MU39	P53041;H0YDU8;A8MU39	Serine/threonine-protein phosphatase 5;Serine/threonine-protein phosphatase	PPP5C	-1.95	0.00499148	0.83
P10809;A0A7I2V599;A0A7I2V2X6;A0A7I2YQK6;A0A7I2V5M1;A0A7I2V5K3;A0A7I2YQ71;A0A7I2V369;E7EXB4;E7ESH4;C9JL25;C9JCQ4;C9JL19;C9J0S9	P10809;A0A7I2V599;A0A7I2V2X6;A0A7I2YQK6;A0A7I2V5M1;A0A7I2V5K3;A0A7I2YQ71	60 kDa heat shock protein, mitochondrial	HSPD1	-1.29	0.00499517	0.83
Q9Y2H6;G5E9X3;A0A087X1M6;H7C507	Q9Y2H6;G5E9X3	Fibronectin type-III domain-containing protein 3A	FNDC3A	-1.46	0.00502724	0.83
F8W0Q9;Q8NEY8;F8WF16;B7Z8L1;F8VPY7;F8VWU8;F8VRK2;F8VXV7;REV__K7EN69	F8W0Q9;Q8NEY8;F8WF16;B7Z8L1	Periphilin-1	PPHLN1	-2.81	0.0050931	0.83
P36969;K7EJ20;K7EKX7;K7ENB4;R4GNE4;A0A087X247	P36969;K7EJ20;K7EKX7;K7ENB4;R4GNE4	Phospholipid hydroperoxide glutathione peroxidase, mitochondrial;Glutathione peroxidase	GPX4	-1.85	0.00510845	0.831
P34059;H3BP66	P34059	N-acetylgalactosamine-6-sulfatase	GALNS	-2.22	0.00511105	0.831
Q8NDX5;E7EX82;H7C528;C9J6H0;C9JAU4;H7C4H9;C9JYH7;F8WDA4;G5E9U7;B4DTC4	Q8NDX5;E7EX82	Polyhomeotic-like protein 3	PHC3	-2.5	0.00513678	0.831
P13861;H7C330;H7C1L0;H7C4A9;C9J830	P13861	cAMP-dependent protein kinase type II-alpha regulatory subunit	PRKAR2A	-1.36	0.00515469	0.831
C9J9P8;Q969M7;F8WD80;F8WDQ9;H3BSR4;C9JFD2;C9IZ93;H3BUI7;F8WB39;F8WCT3	C9J9P8;Q969M7;F8WD80;F8WDQ9;H3BSR4;C9JFD2	NEDD8-conjugating enzyme UBE2F	UBE2F;UBE2F-SCLY	-3.04	0.00517267	0.831
Q9UKY7	Q9UKY7	Protein CDV3 homolog	CDV3	-2.77	0.00521572	0.831
Q8ND56;A0A140TA76;K7EMZ9;I3L4Q1;A0A0G2JQ95;A0A096LP11;A0A140TA66	Q8ND56;A0A140TA76;K7EMZ9	Protein LSM14 homolog A	LSM14A	-2.44	0.00521969	0.831
A0A087X1W8;A0A0A0MTJ8;X5DQS5;Q9BY67;A0A087X0T8;F5H8J9;F5H125;H0YG94;F5H0H5	A0A087X1W8;A0A0A0MTJ8;X5DQS5;Q9BY67;A0A087X0T8	Cell adhesion molecule 1	CADM1	-3.59	0.00523789	0.832
G3V0I5;P49821;B4DE93;E9PMX3;E9PQP1;E9PPR0;E9PPS5;H0YE81;E9PLC6;E9PJL9;H0YD04;E9PPD6	G3V0I5;P49821;B4DE93	NADH dehydrogenase [ubiquinone] flavoprotein 1, mitochondrial	NDUFV1	-1.77	0.00526438	0.832
P56962;E9PIC2;E9PJV6;E9PJW1;E9PQU9	P56962;E9PIC2	Syntaxin-17	STX17	-2.86	0.00536161	0.832
P14317;E7EVW7;F8WDD5;F8WEZ6	P14317;E7EVW7	Hematopoietic lineage cell-specific protein	HCLS1	-2.65	0.00539475	0.833
P34897;H0YIZ0;G3V5L0;G3V540;G3V2W0;G3V241;G3V3Y8;G3V4T0;G3V2E4;G3V2Y1;G3V3C6	P34897	Serine hydroxymethyltransferase, mitochondrial	SHMT2	-1.54	0.00548664	0.833
P55735;A8MXL6;E7ERC8	P55735;A8MXL6	Protein SEC13 homolog	SEC13	-1.67	0.00549782	0.833
Q92887;A0A3B3ITG8;O15440	Q92887	Canalicular multispecific organic anion transporter 1	ABCC2	-2.08	0.00552877	0.834
P01024;M0QYC8;M0QXZ3;M0R0Q9;REV__A0A087X0M8;REV__O00533	P01024	Complement C3;Complement C3 beta chain;C3-beta-c;Complement C3 alpha chain;C3a anaphylatoxin;Acylation stimulating protein;Complement C3b alpha chain;Complement C3c alpha chain fragment 1;Complement C3dg fragment;Complement C3g fragment;Complement C3d fragment;Complement C3f fragment;Complement C3c alpha chain fragment 2	C3	-1.23	0.00561844	0.834
Q9NVT9;E5RJ86;E5RHK3;E9PR92	Q9NVT9;E5RJ86	Armadillo repeat-containing protein 1	ARMC1	-1.66	0.00563149	0.834
Q8IXI2;H7BXZ6;K7EIQ7;J3QLG2;J3KSR5	Q8IXI2;H7BXZ6	Mitochondrial Rho GTPase 1;Mitochondrial Rho GTPase	RHOT1	-1.76	0.00567846	0.835
P14927;B7Z2R2	P14927;B7Z2R2	Cytochrome b-c1 complex subunit 7	UQCRB	-1.91	0.00571104	0.835
J3KR35;Q8WUD4;C9JUN5;S4R331	J3KR35;Q8WUD4;C9JUN5	Coiled-coil domain-containing protein 12	CCDC12	-1.66	0.00571648	0.835
Q9H074;D6R9H8;H0YA44	Q9H074	Polyadenylate-binding protein-interacting protein 1	PAIP1	-1.65	0.00571771	0.835
P03928	P03928	ATP synthase protein 8	MT-ATP8	-4.31	0.00572239	0.835
Q9UPT8;M0QY97	Q9UPT8;M0QY97	Zinc finger CCCH domain-containing protein 4	ZC3H4	-1.91	0.00575938	0.835
O60271;H0YBE9;D6RHI8;H0YBS5;A0A8I5KWZ2;H0Y981	O60271	C-Jun-amino-terminal kinase-interacting protein 4	SPAG9	-1.42	0.00577752	0.835
P14324;A0A087WVN4;A0A087X090;A0A087X1D8;REV__H0YCZ3;REV__Q5VSG8	P14324;A0A087WVN4;A0A087X090	Farnesyl pyrophosphate synthase	FDPS	-2.16	0.0058041	0.836
Q9H9B4;D6RFI0;S4R2X2;D6RDG7;D6RAE9	Q9H9B4;D6RFI0;S4R2X2	Sideroflexin-1	SFXN1	-1.34	0.00581234	0.836
Q13283;A0A7I2V5M7;A0A7I2YQN9;A0A7P0P2U7;A0A7I2YQU8;A0A7I2V651;E5RH42;E5RJU8;E5RIF8;A0A7I2V2S5;A0A7I2YQH0;A0A7I2V2V1;A0A7I2V565;E5RH00;A0A7I2V3C4;A0A7I2V4Y8;A0A7I2V548;A0A7I2YQF2;A0A7I2V2X7;A0A7I2YQB1;A0A7I2V4D8;A0A7I2V494;A0A7I2YQQ8;A0A7I2V5H1;A0A7I2V326;A0A7I2YQM1;A0A7I2V533;A0A7I2V496	Q13283;A0A7I2V5M7;A0A7I2YQN9;A0A7P0P2U7;A0A7I2YQU8;A0A7I2V651	Ras GTPase-activating protein-binding protein 1	G3BP1	-1.73	0.00582949	0.836
P16278;E7EQ29;C9J539;C9JWX1;C9J4G9	P16278;E7EQ29	Beta-galactosidase	GLB1	-1.33	0.00589307	0.836
G3V5N8;Q9HBF4	G3V5N8;Q9HBF4	Zinc finger FYVE domain-containing protein 1	ZFYVE1	-1.85	0.00590159	0.836
P80108	P80108	Phosphatidylinositol-glycan-specific phospholipase D	GPLD1	-3.32	0.00591632	0.836
Q504Q3;F8VXK8	Q504Q3	PAB-dependent poly(A)-specific ribonuclease subunit PAN2	PAN2	-1.71	0.00593209	0.836
Q15084	Q15084	Protein disulfide-isomerase A6	PDIA6	-1.23	0.00593298	0.836
Q6ZUJ8	Q6ZUJ8	Phosphoinositide 3-kinase adapter protein 1	PIK3AP1	-1.1	0.00593472	0.836
Q9UKU7;E9PLS3	Q9UKU7	Isobutyryl-CoA dehydrogenase, mitochondrial	ACAD8	-1.89	0.00594973	0.836
Q13243;B4DJK0;B4DUA4;G3V5K8	Q13243;B4DJK0;B4DUA4;G3V5K8	Serine/arginine-rich splicing factor 5	SRSF5	-2.53	0.00597641	0.837
P62877	P62877	E3 ubiquitin-protein ligase RBX1;E3 ubiquitin-protein ligase RBX1, N-terminally processed	RBX1	-2.02	0.00598429	0.837
Q9UMZ2;A0A087WZS7;A0A087WW94	Q9UMZ2	Synergin gamma	SYNRG	-2.69	0.00599081	0.837
A0A1W2PQS6;S4R435	A0A1W2PQS6;S4R435		RPS10-NUDT3	-1.89	0.00604826	0.837
K7EM05;Q8NC06;K7EMH4	K7EM05;Q8NC06	Acyl-CoA-binding domain-containing protein 4	ACBD4	-3.48	0.0060805	0.837
P68036	P68036	Ubiquitin-conjugating enzyme E2 L3	UBE2L3	-1.98	0.00611548	0.838
Q8N612;E9PJK5	Q8N612;E9PJK5	FTS and Hook-interacting protein	FAM160A2	-1.85	0.00614728	0.838
Q9H0M0;H0YBA4;H0YBS9	Q9H0M0	NEDD4-like E3 ubiquitin-protein ligase WWP1	WWP1	-1.75	0.00617018	0.838
P42685	P42685	Tyrosine-protein kinase FRK	FRK	-2.68	0.00619391	0.838
Q00765;E2QRG8;B7Z510;H0Y8J8;B7Z332	Q00765;E2QRG8	Receptor expression-enhancing protein 5;Receptor expression-enhancing protein	REEP5	-3.91	0.00619647	0.838
Q8IXM3	Q8IXM3	39S ribosomal protein L41, mitochondrial	MRPL41	-2.56	0.00623863	0.838
P08574	P08574	Cytochrome c1, heme protein, mitochondrial	CYC1	-2.95	0.00625431	0.838
Q7L5Y1;A0A3F2YNX7;J3QL81;J3QL99;J3QSB6;R4GNF8;X6RM24	Q7L5Y1;A0A3F2YNX7;J3QL81	Mitochondrial enolase superfamily member 1	ENOSF1	-1.96	0.00626678	0.838
O43865	O43865	Putative adenosylhomocysteinase 2	AHCYL1	-1.44	0.00630981	0.839
Q5T9A4	Q5T9A4	ATPase family AAA domain-containing protein 3B	ATAD3B	-1.99	0.00636774	0.839
O43504	O43504	Ragulator complex protein LAMTOR5	LAMTOR5	-1.96	0.00637787	0.839
A0A0U1RQE4;A0A494C1M0;Q5HYK7;A0A0U1RQN2	A0A0U1RQE4;A0A494C1M0;Q5HYK7	SH3 domain-containing protein 19	SH3D19	-2.93	0.00640782	0.839
G3V529;Q9GZR7;F5GYL3;A0A1W2PRR2;A0A087WXU8	G3V529;Q9GZR7;F5GYL3;A0A1W2PRR2;A0A087WXU8	ATP-dependent RNA helicase DDX24	DDX24	-3.8	0.00648636	0.84
Q92506	Q92506	Estradiol 17-beta-dehydrogenase 8	HSD17B8	-1.31	0.00651665	0.84
P43487;C9JJ34	P43487;C9JJ34	Ran-specific GTPase-activating protein	RANBP1	-2.29	0.0065248	0.84
Q9UJ83;B3KPX4;C9JJM7;Q7Z773;F8WCH9	Q9UJ83;B3KPX4	2-hydroxyacyl-CoA lyase 1	HACL1	-2.17	0.00653759	0.84
P53384;I3L531;I3L3A0;I3L518	P53384	Cytosolic Fe-S cluster assembly factor NUBP1	NUBP1	-3.94	0.00653931	0.84
P35218;A0A3B3ITU9;A0A3B3IRX9;A0A3B3ITA6	P35218;A0A3B3ITU9;A0A3B3IRX9	Carbonic anhydrase 5A, mitochondrial	CA5A	-2.9	0.00655689	0.84
Q9BYT8	Q9BYT8	Neurolysin, mitochondrial	NLN	-1.72	0.00658935	0.84
P28074;H0YJM8	P28074	Proteasome subunit beta type-5	PSMB5	-1.56	0.00661983	0.84
Q9BY89	Q9BY89	Uncharacterized protein KIAA1671	KIAA1671	-2.58	0.00662489	0.841
Q8N4Q1	Q8N4Q1	Mitochondrial intermembrane space import and assembly protein 40	CHCHD4	-3.14	0.00665276	0.841
Q7L0Y3;C9JVB6	Q7L0Y3;C9JVB6	Mitochondrial ribonuclease P protein 1	TRMT10C	-1.48	0.00665408	0.841
P53602;H3BP35;H3BQ47;H3BRZ1;H3BVC4	P53602;H3BP35	Diphosphomevalonate decarboxylase	MVD	-2.33	0.00666025	0.841
Q8WXA9;H0YC47	Q8WXA9	Splicing regulatory glutamine/lysine-rich protein 1	SREK1	-1.61	0.00671205	0.841
O00625	O00625	Pirin	PIR	-2.37	0.00675072	0.841
Q8TAT6;I3L4U9;A0A0D9SFI9;I3L3I1;I3L283;I3L281	Q8TAT6	Nuclear protein localization protein 4 homolog	NPLOC4	-1.37	0.00680988	0.842
Q96CS3;D6RBG6	Q96CS3	FAS-associated factor 2	FAF2	-1.36	0.0068297	0.842
P63241;I3L397;I3L504;Q6IS14	P63241;I3L397;I3L504;Q6IS14	Eukaryotic translation initiation factor 5A-1;Eukaryotic translation initiation factor 5A;Eukaryotic translation initiation factor 5A-1-like	EIF5A;EIF5AL1	-1.89	0.00684469	0.842
Q9H2G2;A0A5F9ZH68	Q9H2G2	STE20-like serine/threonine-protein kinase	SLK	-1.31	0.00690858	0.842
P62834	P62834	Ras-related protein Rap-1A	RAP1A	-2.31	0.00694138	0.842
Q9UHG3;F8W8W4	Q9UHG3;F8W8W4	Prenylcysteine oxidase 1	PCYOX1	-1.53	0.00696652	0.842
J3QLB2;Q8N1S5;J3QLA9;J3QRN3;A0A0J9YXE3;A0A0J9YXX3;J3KS66;A0A0J9YXZ0;J3KTP1;J3QQP1	J3QLB2;Q8N1S5	Zinc transporter ZIP11	SLC39A11	-3.15	0.006991	0.842
P17050	P17050	Alpha-N-acetylgalactosaminidase	NAGA	-1.38	0.00708585	0.843
P55327;E5RK35	P55327	Tumor protein D52	TPD52	-3.94	0.00708682	0.843
Q13435;E9PPJ0;H0YCG1;E9PJ04;E9PJT3;H0YEX5;E9PIL8	Q13435;E9PPJ0	Splicing factor 3B subunit 2	SF3B2	-1.32	0.0070918	0.843
Q99969;C9J8S2	Q99969;C9J8S2	Retinoic acid receptor responder protein 2	RARRES2	-3.36	0.00716128	0.843
Q9BRP8	Q9BRP8	Partner of Y14 and mago	WIBG	-1.32	0.0071873	0.843
A1BQX2;D6RA09;Q8N4S9;A0A0G2JQ38;A0A0G2JN23;D6RAH8;A0A0G2JN00	A1BQX2;D6RA09;Q8N4S9;A0A0G2JQ38;A0A0G2JN23	MARVEL domain-containing protein 2	MARVELD2	-2	0.00721537	0.844
Q9H9C1;G3V4K3;G3V549	Q9H9C1;G3V4K3	Spermatogenesis-defective protein 39 homolog	VIPAS39	-2.83	0.00723314	0.844
Q14534;E7EVQ6;H0YBN7;E5RJH9	Q14534;E7EVQ6	Squalene monooxygenase	SQLE	-2.5	0.00723443	0.844
A0A3B3ISF0;Q659C4;D6RJB0;H0Y9K3;D6R9W6;A0A3B3IT29;A0A3B3ISF8;G3V0E9	A0A3B3ISF0;Q659C4;D6RJB0	La-related protein 1B	LARP1B	-1.85	0.00729765	0.844
Q8NFZ0;F6UZG9	Q8NFZ0;F6UZG9	F-box only protein 18	FBXO18	-3.26	0.00732111	0.844
Q6ZRV2;A0A494C1T9;J3KPS2	Q6ZRV2;A0A494C1T9;J3KPS2	Protein FAM83H	FAM83H	-2.01	0.00739748	0.845
Q5T2W1;A8MUH7;A0A0C4DG67	Q5T2W1;A8MUH7	Na(+)/H(+) exchange regulatory cofactor NHE-RF3;Putative PDZ domain-containing protein 1P	PDZK1;PDZK1P1	-1.82	0.0074389	0.845
Q03591;B1AKG0	Q03591;B1AKG0	Complement factor H-related protein 1	CFHR1	-3.04	0.00745169	0.845
Q96JM3;A0A2R8Y735;S4R3K0;A0A2R8Y4S6	Q96JM3	Chromosome alignment-maintaining phosphoprotein 1	CHAMP1	-2.85	0.00748942	0.845
Q8NHG8;J3KTB9;H3BUF0	Q8NHG8	E3 ubiquitin-protein ligase ZNRF2	ZNRF2	-2.97	0.00750696	0.845
F8VWL3;B7Z493;E9PJX4;Q96M96;F8W1R0;A0A804HK93;E9PNX0;E9PQT1;J3KSS3;F8VVF1;H0YDQ0	F8VWL3;B7Z493;E9PJX4;Q96M96;F8W1R0	FYVE, RhoGEF and PH domain-containing protein 4	FGD4	-2.25	0.00761132	0.846
Q6UX53	Q6UX53	Methyltransferase-like protein 7B	METTL7B	-1.92	0.0076773	0.846
Q14677;H0YD52;H0YDU9;A0A5F9ZHV2	Q14677	Clathrin interactor 1	CLINT1	-1.73	0.00769644	0.846
P50552;K7EM16;K7ENL7;K7ENR7;K7EQD0;K7EIG8	P50552	Vasodilator-stimulated phosphoprotein	VASP	-1.7	0.00770781	0.846
P53701	P53701	Cytochrome c-type heme lyase	HCCS	-1.84	0.00774932	0.846
Q14240;E7EQG2;E7EMV8;J3KSN7;E9PBH4;C9JUF0	Q14240;E7EQG2	Eukaryotic initiation factor 4A-II;Eukaryotic initiation factor 4A-II, N-terminally processed	EIF4A2	-1.47	0.00781552	0.846
Q9H1K0;H7C204;F8WE50;C9JZZ1	Q9H1K0	Rabenosyn-5	RBSN	-2.22	0.00785991	0.847
O94903;E5RG77;E5RFX7;H0YBG2;E5RFZ4	O94903;E5RG77	Proline synthase co-transcribed bacterial homolog protein	PROSC	-1.78	0.00790467	0.847
J3KNN3;P15735;H3BTW6;H3BP07;H3BTI9;H3BN16;C9JME8;C9J2Q6	J3KNN3;P15735;H3BTW6;H3BP07	Phosphorylase b kinase gamma catalytic chain, liver/testis isoform	PHKG2	-2.3	0.00795476	0.847
P34949;H3BPB8;F5GX71;H3BUZ9;H3BPP3;H3BP57;H3BMZ9;H3BT48;H3BPM5;H3BNY8;H3BT46;H3BQX0;H3BU66;H3BPU7;B4DYB8;H3BN01;H3BUG1	P34949;H3BPB8;F5GX71;H3BUZ9;H3BPP3;H3BP57;H3BMZ9;H3BT48	Mannose-6-phosphate isomerase	MPI	-1.5	0.00798406	0.847
Q96CP2;I3L1Y9;I3L4I0;I3L0R3;I3L231;Q4VC44	Q96CP2;I3L1Y9;I3L4I0	FLYWCH family member 2	FLYWCH2	-2.19	0.00799588	0.847
P06213;M0R3E6	P06213	Insulin receptor;Insulin receptor subunit alpha;Insulin receptor subunit beta	INSR	-2.49	0.0081268	0.848
P18510	P18510	Interleukin-1 receptor antagonist protein	IL1RN	-2.58	0.00812976	0.848
Q9P035;H3BS72;H3BPZ1;H3BRL8;H3BMZ1	Q9P035;H3BS72;H3BPZ1	Very-long-chain (3R)-3-hydroxyacyl-CoA dehydratase 3	HACD3	-1.95	0.00815141	0.848
Q16890;E9PPQ1;J3KNE7	Q16890;E9PPQ1;J3KNE7	Tumor protein D53	TPD52L1	-2.62	0.00815869	0.848
Q93100;I3L0Z1;I3NHZ9;I3L1N3	Q93100	Phosphorylase b kinase regulatory subunit beta	PHKB	-2.07	0.00816256	0.848
P43251;A0A5F9ZH15;A0A5F9ZH80;C9JSN9;A0A5F9ZH57;A0A5F9ZH97;A0A5F9ZHE9;A0A5F9ZHR1;A0A2R8Y5J9;A0A5F9ZHF5	P43251;A0A5F9ZH15;A0A5F9ZH80	Biotinidase	BTD	-1.8	0.0081657	0.848
Q13586;G0XQ39;E9PNJ4	Q13586;G0XQ39;E9PNJ4	Stromal interaction molecule 1	STIM1	-2.17	0.00817624	0.848
P38646;A0A7I2V2G2;D6RCD7;A0A7I2V2S7;A0A7I2YQB2;A0A7I2V3F7;H0Y8K0;A0A3B3ITI4;H0Y8S0	P38646;A0A7I2V2G2;D6RCD7;A0A7I2V2S7;A0A7I2YQB2;A0A7I2V3F7;H0Y8K0	Stress-70 protein, mitochondrial	HSPA9	-1.15	0.00824342	0.848
Q5TFE4;Q5QPD0;H0YDA5	Q5TFE4	5-nucleotidase domain-containing protein 1	NT5DC1	-1.63	0.00832032	0.849
Q8TEB9;B9A054	Q8TEB9;B9A054	Rhomboid-related protein 4	RHBDD1	-3.25	0.00833908	0.849
P01042	P01042	Kininogen-1;Kininogen-1 heavy chain;T-kinin;Bradykinin;Lysyl-bradykinin;Kininogen-1 light chain;Low molecular weight growth-promoting factor	KNG1	-1.39	0.00840656	0.849
A0A804HKS6;Q6ZS30;A0A804HJ72;H7BZA0;A0A804HJM0;A0A804HJX4	A0A804HKS6;Q6ZS30;A0A804HJ72	Neurobeachin-like protein 1	NBEAL1	-1.89	0.00844836	0.849
O75886	O75886	Signal transducing adapter molecule 2	STAM2	-1.79	0.00856434	0.85
Q6P1M0	Q6P1M0	Long-chain fatty acid transport protein 4	SLC27A4	-1.86	0.00865152	0.85
A0A5F9UK94;Q01433;H0Y360;A0A804CCZ3;A0A7P0Z4H6;H0YF16;A0A590UK85;A0A590UJX5;A0A7P0TB79;E9PJF6;A0A7P0T999;E9PIJ1	A0A5F9UK94;Q01433;H0Y360;A0A804CCZ3;A0A7P0Z4H6;H0YF16;A0A590UK85;A0A590UJX5	AMP deaminase 2	AMPD2	-1.42	0.00868551	0.85
P49588;A0A6Q8PGN5;A0A6Q8PFY2;A0A6Q8PF33;A0A6Q8PGE8;H3BPK7;A0A6Q8PGR9;A0A6Q8PGB5;A0A6Q8PFK3;A0A6Q8PHJ2;A0A6Q8PH44;A0A6Q8PHP7;A0A6Q8PHP3;A0A6Q8PF77;A0A6Q8PG28;A0A6Q8PG62;A0A6Q8PGI8;A0A6Q8PHN5	P49588;A0A6Q8PGN5;A0A6Q8PFY2;A0A6Q8PF33;A0A6Q8PGE8;H3BPK7;A0A6Q8PGR9;A0A6Q8PGB5;A0A6Q8PFK3;A0A6Q8PHJ2;A0A6Q8PH44;A0A6Q8PHP7	Alanine--tRNA ligase, cytoplasmic	AARS	-1.09	0.00873293	0.85
Q9BRX2;REV__A0A2R8YCL0;REV__A0A2R8YD19;REV__A0A2R8Y511;REV__A0A2R8YFH3;REV__A0A2R8Y3S0;REV__Q96JX3	Q9BRX2	Protein pelota homolog	PELO	-2.06	0.00879449	0.851
P31689	P31689	DnaJ homolog subfamily A member 1	DNAJA1	-1.38	0.00888721	0.851
O15217;Q5JW88	O15217	Glutathione S-transferase A4	GSTA4	-4.46	0.00888899	0.851
P00748	P00748	Coagulation factor XII;Coagulation factor XIIa heavy chain;Beta-factor XIIa part 1;Coagulation factor XIIa light chain	F12	-2.41	0.00899886	0.851
Q04637;A0A7I2Y1C3;C9JF13;C9J6B6	Q04637;A0A7I2Y1C3	Eukaryotic translation initiation factor 4 gamma 1	EIF4G1	-1.1	0.00902395	0.851
Q6XQN6;G5E977;C9J8U2;H0YF31;A0A087WUT5;H0YDA6	Q6XQN6;G5E977;C9J8U2	Nicotinate phosphoribosyltransferase	NAPRT	-1.19	0.00902795	0.851
Q9GZM7;F6SDV2	Q9GZM7;F6SDV2	Tubulointerstitial nephritis antigen-like	TINAGL1	-3.34	0.0090361	0.851
Q5THJ4;H3BLS7;A0A2R8YD87;A0A2R8Y876;F5GX56	Q5THJ4;H3BLS7	Vacuolar protein sorting-associated protein 13D	VPS13D	-3.65	0.00905079	0.852
P21589;H0Y7R7;Q96B60;H0Y3X5	P21589	5-nucleotidase	NT5E	-2.83	0.00914915	0.852
M0QYZ2;M0R0N4;P53680;X6R390;M0R1S0	M0QYZ2;M0R0N4;P53680;X6R390	AP-2 complex subunit sigma	AP2S1	-1.05	0.00921558	0.852
Q9UH92;K7EID0	Q9UH92;K7EID0	Max-like protein X	MLX	-3.05	0.00950752	0.853
Q8WYP5;H7C4S1	Q8WYP5	Protein ELYS	AHCTF1	-1.85	0.00953208	0.853
Q9Y3E2	Q9Y3E2	BolA-like protein 1	BOLA1	-3.37	0.00953658	0.853
Q9NQS1;H0YKR0	Q9NQS1	Cell death regulator Aven	AVEN	-2.44	0.00955106	0.853
Q6IAA8;F5GX19;F5H3Y3;H0YFI1;F5H479	Q6IAA8;F5GX19;F5H3Y3;H0YFI1;F5H479	Ragulator complex protein LAMTOR1	LAMTOR1	-1.71	0.00956565	0.853
I3L0E3;Q9Y2R5	I3L0E3;Q9Y2R5	28S ribosomal protein S17, mitochondrial	hCG_1984214;MRPS17	-3.42	0.00964595	0.854
P25685;M0QXK0;A0A7I2V3K7;M0R080;M0QYT3;M0R1D6;M0QZD0;A0A7I2YQW1;M0R128;A0A1B0GX60	P25685;M0QXK0;A0A7I2V3K7;M0R080	DnaJ homolog subfamily B member 1	DNAJB1	-1.07	0.00970182	0.854
P09429;Q5T7C4;B2RPK0	P09429;Q5T7C4	High mobility group protein B1	HMGB1	-1.5	0.00972192	0.854
Q969S9;D6RAL1;D6RF75	Q969S9	Ribosome-releasing factor 2, mitochondrial	GFM2	-2.3	0.00979558	0.854
Q63HR2;F8VV64;R4GMX1;H0YID7	Q63HR2;F8VV64	Tensin-2	TNS2	-1.79	0.00982033	0.854
Q92844;E7EQA9;E7ENY2;E7EVA2;E7EMT6;E7EW82;E7EWR8;E7EM55;E7ERM9;E7EV32;H7C3L4;H7BZ28;E9PEK1	Q92844;E7EQA9;E7ENY2;E7EVA2;E7EMT6;E7EW82	TRAF family member-associated NF-kappa-B activator	TANK	-2.46	0.00983112	0.854
A0A0G2JPP5	A0A0G2JPP5			-1.2	0.00984427	0.854
A0A087WWI0;Q9H2I8;A0A087WZZ7;M0R2H0	A0A087WWI0;Q9H2I8	Leucine-rich repeat-containing protein C10orf11	C10orf11	-2.28	0.00989309	0.855
Q5U5X0;D6R994;D6RBV5	Q5U5X0;D6R994	Complex III assembly factor LYRM7	LYRM7	-2.88	0.00994578	0.855
P51571;A6NLM8	P51571;A6NLM8	Translocon-associated protein subunit delta	SSR4	-1.65	0.00994622	0.855
