# Supplementary material for: Genomic investigations of unexplained acute hepatitis in children
Source: Nature. 2023 Mar 30;617(7961):564–73. doi: 10.1038/s41586-023-06003-w (PMC10170458; doi:10.1038/s41586-023-06003-w)
Supplement: Supplementary file 16 — List of differentially expressed peptides between 5 cases and 7 controls. The p-values were calculated by applying two-tailed empirical Bayes moderated t-statistics on peptide-wise linear models. P values were not adjusted for multiple comparisons. [file 41586_2023_6003_MOESM16_ESM.xlsx]

## Sheet: up
Sequence	Proteins	Leading_razor_protein	Gene_name	case_vs_control_ratio	case_vs_control_p.val	case_vs_control_p.adj
DELQDVQLTEIK	Q9UGV2;Q5TH30	Q9UGV2	NDRG3	12	7.68e-11	0.012
LVTTFK	P07148;A8MW49	P07148	FABP1	9.23	1.55e-10	0.0211
IIVEKPFGR	P11413;E7EUI8;E7EM57;E9PD92	P11413	G6PD	7.89	4.87e-10	0.0428
RVYPEVTVYPAK	A2BFX2;A0A5S8K7D1	A2BFX2	HLA-DRB1	8.39	8.68e-10	0.0551
LVQMLK	Q63HM9	Q63HM9	PLCXD3	7.95	1.09e-09	0.0602
RVEPTVTISPSR	Q5SU54;A2AAZ0;Q5Y7D6;A0A0D5XQ77;Q29967;A0A0U5Q247;A0A140T9Y4;A0A140T981;A0A140T8Z5;A0A140T9R6;P01920;A0A140T9S8;A0A140T9T0;A0A140T9H9	Q5SU54	HLA-DQB1	7.6	1.71e-09	0.0775
TLEEILHK	Q8ND23	Q8ND23	LRRC16B	7.84	1.76e-09	0.0787
YFYHQEEYVR	A2BFX2;A0A5S8K7D1	A2BFX2	HLA-DRB1	8.24	1.9e-09	0.0819
QGVLGIK	P23396;E9PL09;H0YEU2;E9PSF4	P23396	RPS3	6.98	2.08e-09	0.0856
LLIYGNSNRPSGVPDR	sp|A008553|abysis_8553;sp|A008605|abysis_8605;sp|A008512|abysis_8512;sp|A040082|abysis_40082;sp|A037720|abysis_37720;sp|A037721|abysis_37721;sp|A010284|abysis_10284;sp|A010286|abysis_10286;sp|A010289|abysis_10289;sp|A010291|abysis_10291;sp|A005031|abysis_5031;sp|A007331|abysis_7331;sp|A039944|abysis_39944;sp|A009446|abysis_9446;sp|A069449|abysis_69449;sp|A069639|abysis_69639;sp|A012747|abysis_127…	sp|A008553|abysis_8553		8.19	2.44e-09	0.0921
FLSQIESDR	P19367;Q2TB90	Q2TB90	HK1;HKDC1	6.63	3.58e-09	0.107
DQPRPAFSAIR	P02745;X6RLJ0	P02745	C1QA	8.08	3.72e-09	0.108
RDESLKVDEHLAK	D6RA82;D6RFJ9;P12429	P12429	ANXA3	7.21	4.17e-09	0.112
GVAMVTAVAAR	P52790	P52790	HK3	7.18	4.25e-09	0.113
QLQTLAPK	Q8IV08;M0R1F7;M0R2W7;E2QRG1	Q8IV08	PLD3	6.89	4.68e-09	0.118
FLALDLGGTNFR	Q2TB90	Q2TB90	HKDC1	7.2	7.14e-09	0.141
AYGGTTEYAASVK	sp|A057173|abysis_57173;sp|A031079|abysis_31079;sp|A057155|abysis_57155;sp|A060339|abysis_60339;sp|A009861|abysis_9861;sp|A009819|abysis_9819;sp|A009930|abysis_9930;sp|A021436|abysis_21436;sp|A023671|abysis_23671;sp|A055799|abysis_55799;sp|A070055|abysis_70055	sp|A057173|abysis_57173		6.54	7.23e-09	0.142
VIVMLTELK	P08575	P08575	PTPRC	6.72	7.38e-09	0.143
YDQNYDIR	O00203;Q13367;A0A590UKC4;A0A2R8Y2A8;A0A5F9UJV3;A0A590UJ60;A0A590UJU0;A0A590UK04;A0A590UJU7;A0A590UJE5	O00203	AP3B1;AP3B2	6.77	7.64e-09	0.145
DTSASTAYMELSSLR	sp|A032793|abysis_32793;sp|A007065|abysis_7065;sp|A007320|abysis_7320;sp|A007067|abysis_7067;sp|A006603|abysis_6603;sp|A087324|abysis_87324;sp|A006758|abysis_6758;sp|A007226|abysis_7226;sp|A007534|abysis_7534;sp|A087733|abysis_87733;sp|A086947|abysis_86947;sp|A007334|abysis_7334;sp|A041039|abysis_41039;sp|A004407|abysis_4407;sp|A085205|abysis_85205;sp|A014237|abysis_14237;sp|A083593|abysis_83593;…	sp|A008954|abysis_8954		6.9	9.81e-09	0.157
ATDIMDAMLRKLYNVMFAK	O75969	O75969	AKAP3	6.92	9.81e-09	0.157
ELSFGR	Q15084	Q15084	PDIA6	6.35	1.29e-08	0.171
RQIIDAINK	P12111	P12111	COL6A3	7.45	1.3e-08	0.172
LIQIAAR	Q9BUJ2;A0A0A0MRA5;B7Z4B8;M0R3F1	Q9BUJ2	HNRNPUL1	6.7	1.53e-08	0.18
SIPTLISR	C9JW69;P18754	P18754	RCC1	6.16	1.58e-08	0.181
PALPAGTEDTAKEDAANRK	A0A0A0MS51;A0A0A0MT01;CON__Q3SX14;P06396;Q5T0I0	P06396	GSN	6.15	1.81e-08	0.19
SGTGIAAMSVMRPEQIMK	P27449	P27449	ATP6V0C	7.4	1.97e-08	0.195
AGLNSLEAVK	A0A2R8Y5V9;A0A2R8YGX3;A0A590UJB9;A0A590UK79;P67936	P67936	TPM4	8.55	2.07e-08	0.199
ALSDADVQK	P36543	P36543	ATP6V1E1	6.38	2.15e-08	0.201
RLVPDSDVR	P19367	P19367	HK1	7.28	2.32e-08	0.206
AVAISLPK	P50454;E9PJH8;E9PPV6;E9PKH2	P50454	SERPINH1	7.98	2.38e-08	0.208
SSEMPELTSMHTLLLR	P05164	P05164	MPO	8.05	2.42e-08	0.209
LLPTGAGLEPK	P04920;A0A7I2V5T6	P04920	SLC4A2	7.38	2.8e-08	0.22
TAAQVLIR	O60218	O60218	AKR1B10	7.16	2.92e-08	0.223
EVFPVLAAK	Q8WUM4;F8WDK9	Q8WUM4	PDCD6IP	6.22	3.01e-08	0.226
FPFAANSR	P09622;E9PEX6	P09622	DLD	6.57	3.08e-08	0.227
ALIVLAHSER	B4DLR8;P15559;H3BRK3	B4DLR8	NQO1	5.96	3.1e-08	0.228
ALNEITESGR	A0A494C0X7;P05107;J3KNI6;E7EVZ9	A0A494C0X7	ITGB2	6.33	3.2e-08	0.23
VLFDKDVNER	P42224;A0A669KB68;A0A669KB56;A0A669KBA4;A0A669KB53;A0A669KBI6;J3KPM9;A0A669KB52;A0A669KB75;E7EPD2	P42224	STAT1	8.52	3.29e-08	0.233
YIYNQEEYAR	X5D2U9;A0A0G2JJQ8;P13762	X5D2U9	HLA-DRB4	6.36	3.38e-08	0.235
AEYDLTTR	P60228;A0A7I2V3S3;A0A7I2V3I0;A0A7I2V2H9;A0A7I2V2W0;A0A7I2V3I2;A0A7I2V5Z6;H0YBP5;A0A7I2V4G3;E5RHS5;A0A161SXE1;A0A7I2V570;A0A7I2V3W9;E5RII3;A0A7I2V2S9;E5RJ25;E5RIP5	P60228	EIF3E	5.39	3.47e-08	0.237
LNFVQLMFEMSR	0	REV__H0YC37		6.96	3.76e-08	0.245
MELSAEYLR	H3BPT9;A0A087WZT3;Q9H3K6;H3BTW0;H3BVE0	Q9H3K6	BOLA2B;BOLA2	5.59	3.81e-08	0.246
LPDDQIPK	Q01813;A0A7I2V3Z0;B1APP6	Q01813	PFKP	6.93	3.91e-08	0.248
PAQGVVTTLENVSPPRR	H0Y7Z1;P02751	P02751	FN1	6.24	4.01e-08	0.25
AASAAGAAGSAGGSSGAAGAAGGGAGAGTRPGDGGTASAGAAGPGAATK	A0A8I5KX85;Q9UKY7	Q9UKY7	CDV3	8.15	4.04e-08	0.251
SDPIQLEIHR	P12314;A0A0A0MRM3;Q92637;A0A087WXZ6;A0A087WVS4;A0A087WUG7	P12314	FCGR1A;FCGR1B	6.07	4.09e-08	0.252
QALAQISLPR	P05164	P05164	MPO	8.42	4.17e-08	0.254
AAAAAQGGGGGEPR	P27361;E9PQW4;E9PJF0	P27361	MAPK3	5.98	4.22e-08	0.255
LLSYIQR	Q9Y3Z3;A0A2R8YCS7;A0A2R8YD90;A0A2R8YF51;A0A2R8Y5D2;A0A804HL67;A0A2R8Y586;A0A2R8Y7R5;A0A2R8Y755;A0A2R8YG48	Q9Y3Z3	SAMHD1	6.43	4.49e-08	0.26
ASSHSTDLMEAMAMGSVEASYK	A0A804F6T5;A0A804F729	A0A804F6T5		6.51	4.63e-08	0.263
NMINIISR	P54136;E5RJM9;E5RH09	P54136	RARS	6.11	4.98e-08	0.269
SLLVQTK	P39023;G5E9G0	P39023	RPL3	5.98	5e-08	0.269
LPDSFKDSPSK	P27105;F8VSL7	P27105	STOM	6.4	5.04e-08	0.27
ATVQQLEGR	Q01469	Q01469	FABP5	8.87	5.17e-08	0.272
AEEQPQVELFVK	O00299	O00299	CLIC1	7.63	5.92e-08	0.284
NNQVLGIGSGSTIVHAVQR	P49247	P49247	RPIA	6.3	5.92e-08	0.284
GEFAIDGYSVR	O75563	O75563	SKAP2	5.26	6.15e-08	0.288
ATEEFIIR	Q14764;H3BQK6;H3BRL2;H3BUK7;H3BNF6;H3BP76;H3BPZ2;H3BNF2;H3BUP3;H3BQE7	Q14764	MVP	7.96	6.57e-08	0.294
VTMTTDTSTSTAYMELR	sp|A008446|abysis_8446;sp|A021871|abysis_21871;sp|A050883|abysis_50883;sp|A005299|abysis_5299;sp|A069382|abysis_69382;sp|A063888|abysis_63888;sp|A010006|abysis_10006;sp|A071642|abysis_71642;sp|A078872|abysis_78872;sp|A071643|abysis_71643;sp|A002195|abysis_2195;sp|A015176|abysis_15176;sp|A010005|abysis_10005;sp|A049242|abysis_49242;sp|A084557|abysis_84557;sp|A009123|abysis_9123;sp|A015197|abysis_1…	sp|A008446|abysis_8446	IGHV1-18	6.57	6.73e-08	0.296
VASVSQNAIVSAAGNIAR	O75694;E9PF10	O75694	NUP155	5.87	7.23e-08	0.303
GFIPNIR	P35555;E9PHW4;D6RJI3;P35556	P35555	FBN1;FBN2	7.03	7.73e-08	0.309
HQGVMVGMGQKDSYVGDEAQSK	A0A2R8Y793;G5E9R0;A0A6Q8PH58;C9JZR7;C9JTX5;C9JUM1;I3L4N8;K7EM38;P60709;E7EVS6;A0A2R8YGF8;P62736;F6UVQ4;F6QUT6;C9JFL5;F8WB63;B8ZZJ2;P63261;I3L3I0;I3L1U9;I3L3R2;J3KT65;P63267;P68032;P68133;A6NL76	P60709	ACTB;ACTG1;ACTA2;ACTG2;ACTC1;ACTA1	5.96	7.82e-08	0.31
VMNMEESTNGSLAAEFR	P42224;A0A669KB68;A0A669KB56;A0A669KBA4;A0A669KB53;A0A669KBI6;J3KPM9;A0A669KB52;A0A669KB75;E7EPD2	P42224	STAT1	7.05	8.09e-08	0.313
LTFISGR	Q15005;E9PL01;E9PI68;E9PRB9	Q15005	SPCS2	6.51	8.67e-08	0.32
FPTDQLTPDQER	P05164	P05164	MPO	8.27	8.71e-08	0.32
NVQDAIADAEQRGEHALK	CON__P35908;CON__P35908v2;P35908	CON__P35908v2	KRT2	5.79	9.1e-08	0.324
VPVNLLR	Q14204;A0A2R8Y706;A0A7P0T9C4;A0A7P0TA13;A0A2R8Y5T0;A0A7P0T9R4;A0A7P0TAW9;A0A7P0T7V5;A0A7P0T916;A0A7P0T8N2;A0A7P0TBJ7	Q14204	DYNC1H1	5.76	9.24e-08	0.326
NGFPVALAR	P05164	P05164	MPO	7.77	9.57e-08	0.329
LPSNTLDR	P78527	P78527	PRKDC	6	1.09e-07	0.342
AKLEAAIAEAEER	CON__P08729;CON__Q3KNV1;P08729	CON__Q3KNV1	KRT7	7.67	1.1e-07	0.343
MEQVNELK	P31948;F5H783;F5GXD8	P31948	STIP1	5.32	1.15e-07	0.347
LPNSVLGR	Q9NZN4	Q9NZN4	EHD2	5.55	1.16e-07	0.348
DSTTVHEPINK	Q9H0R6;X6R772	Q9H0R6	QRSL1	6.29	1.17e-07	0.349
APLHLHENPDLAK	P55160	P55160	NCKAP1L	6.57	1.2e-07	0.351
NLMALAR	Q99536;K7ESA3	Q99536	VAT1	5.84	1.2e-07	0.352
SETAPAETATPAPVEK	P16401	P16401	HIST1H1B	6.56	1.23e-07	0.353
ANINIEK	P61026	P61026	RAB10	6.17	1.25e-07	0.355
AISVLAK	Q13404;I3L0A0;G3V2F7	Q13404	UBE2V1;TMEM189-UBE2V1	5.51	1.25e-07	0.355
TMPFFLEGK	Q8NHU6	Q8NHU6	TDRD7	10.1	1.39e-07	0.365
ANPALYVLR	Q6P2Q9	Q6P2Q9	PRPF8	5.11	1.41e-07	0.366
GPDPGVPAYR	A0A3B3ITK0;P35442;A0A7I2YQT6;A0A7I2V585;A0A7I2V344;Q5RI53	A0A3B3ITK0	THBS2	5.81	1.42e-07	0.367
ATFISVQLK	Q8WUM4;A0A3B3IT07;C9IZF9;F8WEQ7;F8WBR8	Q8WUM4	PDCD6IP	5.95	1.43e-07	0.368
AEELVLER	P21980;A2A299;A2A2A0	P21980	TGM2	8.7	1.52e-07	0.373
LEAELR	CON__O95678;O95678;CON__Q3KNV1;P08729;Q9BYX2	CON__Q3KNV1	KRT75;KRT7;TBC1D2	6.89	1.54e-07	0.375
LMLLDATFR	Q6PIU2;A0A0A0MTJ9;H7C046;F8WE33	Q6PIU2	NCEH1	5.57	1.54e-07	0.375
ATAPYNYSYIFK	P61106;X6RFL8	P61106	RAB14	5.49	1.57e-07	0.376
ALLSPEQR	A6NC48;Q10588	A6NC48	BST1	5.59	1.58e-07	0.377
SEIVGSIK	Q9BXS5;E7ENJ6;K7EJL1	Q9BXS5	AP1M1	5.42	1.6e-07	0.378
GNQPVGVGLEAAK	A0A3B3ITK0;P35442;A0A7I2YQT6;A0A7I2V585;A0A7I2YQ86	A0A3B3ITK0	THBS2	6.92	1.6e-07	0.378
YESSTASALVA	P62277	P62277	RPS13	5.77	1.66e-07	0.382
RLTVSSLQESGLK	P21333;A0A7P0NMY4;Q60FE5	P21333	FLNA	7.72	1.68e-07	0.382
FQPFESYDSR	A0A7P0T893;O43823;M0QX51;A0A7P0TBC8	A0A7P0T893	AKAP8	5.12	1.72e-07	0.385
LSNRPAFMPSEGR	A0A804HII9;A0A804HK61;A0A7I2V4Y4;A0A804HLF4;A0A804HIN7;A0A804HL31;P12814	A0A804HII9	ACTN1	7.88	1.79e-07	0.389
ALLTLADGRR	D6RA82;P12429	P12429	ANXA3	5.02	1.82e-07	0.39
LPRPSSLSDK	Q86UX7;F5H1C6;F5H3I6	Q86UX7	FERMT3	5.25	1.86e-07	0.392
KVTEENKELANELR	P07996;CON__Q28194	P07996	THBS1	5.75	2.03e-07	0.4
IDFGEAAR	P08754	P08754	GNAI3	5.7	2.04e-07	0.4
LSLTGHISTVR	O43660;H0YA24	O43660	PLRG1	5.63	2.05e-07	0.401
KSESEVEEAAAIIAQRPDNPR	Q16643;D6R9W4;D6R9Q9	Q16643	DBN1	5.07	2.17e-07	0.406
VVFTDLGNK	Q92608;E5RFJ0	Q92608	DOCK2	4.91	2.22e-07	0.408
ATIGLIR	P14923	P14923	JUP	4.97	2.24e-07	0.408
SFAGNLNTYK	Q01813;A0A7I2V3Z0;B1APP6	Q01813	PFKP	5.14	2.25e-07	0.409
LVTTVTEIAG	Q01518	Q01518	CAP1	8.48	2.33e-07	0.413
FGAAVLGNHTAR	Q5T1M5;A0A8I5KX71;A0A8I5QJ94;A0A8I5QJL3;A0A8I5KQM8;A0A8I5KRZ8;A0A8I5KV70;A0A8I5KXA6;A0A8I5KRH4	Q5T1M5	FKBP15	5.84	2.38e-07	0.415
GFPSVLR	sp|A008822|abysis_8822;P01871;sp|A057527|abysis_57527;sp|A087603|abysis_87603;sp|A009056|abysis_9056;sp|A009066|abysis_9066;sp|A078737|abysis_78737;sp|A034261|abysis_34261;sp|A081288|abysis_81288;sp|A081302|abysis_81302;sp|A034702|abysis_34702;sp|A078738|abysis_78738	sp|A034261|abysis_34261	IGHM	7.6	2.39e-07	0.416
VSTAVLSITAK	Q99460;A0A087WW66;A0A7I2V5C8;A0A7I2V262;A0A7I2YQY1;A0A7I2V479;A0A7I2V2K8;A0A7I2V641	Q99460	PSMD1	7.04	2.4e-07	0.416
NTIYEIQDNTGSMDVVGSGK	P41218;H0Y6P3	P41218	MNDA	5.7	2.61e-07	0.425
GASYILK	P30740	P30740	SERPINB1	6.07	2.7e-07	0.429
FSISNANIK	A0A2R8YDF1;P17213	A0A2R8YDF1	BPI	5.8	2.8e-07	0.433
SSLTLATAINQR	A0A0A0MTR7;A0A0A0MTC1;Q63HN8	A0A0A0MTR7	RNF213	4.71	2.81e-07	0.433
ELANTIK	P80511	P80511	S100A12	7.04	2.81e-07	0.433
ALPSKPNSLDQFK	Q5JVZ5;Q96JJ3;H0YCM7;Q5JW01	Q5JVZ5	ELMO2	5.06	2.82e-07	0.434
RFVEQVAR	P12110	P12110	COL6A2	7.89	2.83e-07	0.434
AQPSVVLSAAHTVAAR	A0A384DVU0;Q8IY17	A0A384DVU0	PNPLA6	5.15	2.84e-07	0.435
LAAQFIPK	Q9BZZ5;G3V1C3;E9PQK6	Q9BZZ5	API5	5.43	2.89e-07	0.436
VFGNEIK	A0A7I2V428;C9JLB1;P19338;H7BY16;A0A7I2V3F3;A0A7I2V5M5;A0A7I2V2U7;A0A7I2V349;A0A7I2V506;A0A7I2V699;A0A7I2V2S8	A0A7I2V428	NCL	7.57	3.02e-07	0.441
VRVELSTGMPR	A0A0B4J1Z1;C9JAB2;Q16629	A0A0B4J1Z1	SRSF7	5.53	3.02e-07	0.441
SQLMNLIR	A0A1W2PNR9;Q9Y5U9	A0A1W2PNR9	IER3IP1	5.49	3.12e-07	0.445
SGDDLFPKDDK	O60218	O60218	AKR1B10	5.45	3.22e-07	0.448
AAAAEGVLATR	Q6QNY1	Q6QNY1	BLOC1S2	5.03	3.25e-07	0.449
SLLNVSR	Q96M27	Q96M27	PRRC1	6	3.26e-07	0.449
QSVEADINGLR	A0A1B0GVI3;CON__P13645;P13645;CON__P02535-1;K7ERE3;CON__ENSEMBL:ENSP00000377550;P13646;K7EMD9;CON__P08730-1;CON__P13646-1;CON__Q2M2I5;Q2M2I5	A0A1B0GVI3	KRT10;KRT13;KRT24	6.56	3.27e-07	0.449
DKVMSEFNNNFR	F8VV56;F8W022;F8VWK8;P08962;F8VNT9	F8VV56	CD63	5.33	3.37e-07	0.452
VYPEVTVYPAK	A2BFX2;A0A5S8K7D1	A2BFX2	HLA-DRB1	7.82	3.38e-07	0.453
ATVLLSMSK	Q53EL6	Q53EL6	PDCD4	5.05	3.39e-07	0.453
LIASSLVAGEK	F8W9S7;Q14C86;C9IZ08;B4DGD8;B0QZ65	Q14C86	GAPVD1	4.5	3.47e-07	0.455
IVVVTAGVR	A0A5F9ZHM4;P07195;A0A3B3IS95;A8MW50;C9J7H8;F5H793	A0A5F9ZHM4	LDHB	8.86	3.47e-07	0.455
LTEEFGPHTK	P55160;F8W050	P55160	NCKAP1L	5.38	3.53e-07	0.457
IQEVAGSLIFR	Q9HD89	Q9HD89	RETN	6.12	3.61e-07	0.459
GFGDLAVLK	O00160	O00160	MYO1F	5.23	3.82e-07	0.465
ATSEQSICQAR	G3V3G2;G3V535;A0A087WYI2	G3V3G2	EVL	5.3	3.84e-07	0.466
LRIEEEIR	E9PMV1;A0A8I5KUE3;A0A8I5KYZ1;A0A8I5KSD5;Q15149	Q15149	PLEC	5.24	3.86e-07	0.466
VVLGAHNLSR	P08246	P08246	ELANE	9.21	3.9e-07	0.467
AQILPIR	A0A087WVQ6;Q00610;J3KS13;J3KSQ2;J3QL20	A0A087WVQ6	CLTC	6.7	3.91e-07	0.468
QILMASGSTTFTK	Q6P2Q9	Q6P2Q9	PRPF8	5.17	3.97e-07	0.469
DTSISTAYMELSR	sp|A007999|abysis_7999;sp|A033126|abysis_33126;sp|A050615|abysis_50615;sp|A052590|abysis_52590;sp|A074950|abysis_74950;sp|A076210|abysis_76210;sp|A077490|abysis_77490;sp|A011470|abysis_11470;sp|A078377|abysis_78377;sp|A010895|abysis_10895;sp|A011921|abysis_11921;sp|A011693|abysis_11693;sp|A010805|abysis_10805;sp|A011905|abysis_11905;sp|A011473|abysis_11473;sp|A011699|abysis_11699;sp|A011679|abysi…	sp|A007999|abysis_7999		6.22	3.98e-07	0.469
DLQVKPGESLEVIQTTDDTK	O15117	O15117	FYB	5.1	3.98e-07	0.47
IKETVDQVEELRR	Q14204;A0A2R8Y706;A0A7P0T9C4;A0A7P0TA13;A0A2R8Y5T0;A0A7P0T9R4;A0A7P0TAW9;A0A7P0T7V5;A0A7P0T916;A0A7P0T8N2;A0A7P0TBJ7;A0A7P0TAF3;A0A7P0TB75;A0A2R8Y6H2;A0A7P0T9K2;A0A7P0T9F1;A0A7P0T8W5;A0A2R8YFZ7;A0A7P0TAM4;A0A7P0T825	Q14204	DYNC1H1	5.83	3.99e-07	0.47
IVVLAKPEHENR	Q92835;H0Y5Q9	Q92835	INPP5D	5.05	4.06e-07	0.472
HIPIAGR	P61158;B4DXW1;Q9P1U1;A0A0A0MTI9;Q9C0K3;H7C4J1	P61158	ACTR3;ACTR3B;ACTR3C	5.91	4.13e-07	0.473
QAFNATAVVR	Q14012;H7C071;Q8IU85	Q14012	CAMK1;CAMK1D	4.83	4.18e-07	0.474
MESDFYLR	P61326	P61326	MAGOH	5.16	4.35e-07	0.478
VPTTEKPTVTVNFR	E7EUU4;E7EX73;C9K073;E9PGM1;Q04637;A0A7I2Y1C3;C9JF13;C9J6B6	Q04637	EIF4G1	5.89	4.42e-07	0.48
ASLQYLLR	Q92619;K7ES98;K7EM85;F5H1R4;K7ES92;A0A087X1A3	Q92619	HMHA1	4.72	4.42e-07	0.48
VPMISGR	P19971;A0A494BZZ4	P19971	TYMP	6.92	4.44e-07	0.48
ADLSAMSAER	P50453	P50453	SERPINB9	6.54	4.51e-07	0.482
FAVGSGSR	A0A1W2PNV4;O15143;C9JEY1;C9K057;F8VXW2	A0A1W2PNV4	ARPC1B	5.68	4.6e-07	0.484
LDFSITKDPAAEAR	P04843;B7Z4L4	P04843	RPN1	4.99	4.62e-07	0.484
SVNGQIESLISPDGSR	CON__P04258;P02461	P02461	COL3A1	5.26	4.73e-07	0.486
VQLEPFPEK	Q16854	Q16854	DGUOK	4.62	4.76e-07	0.487
QLLAGGIAGAVSR	A0A3B3IU96;Q6NUK1	Q6NUK1	SLC25A24	7.33	5.01e-07	0.492
TLLFSGQK	Q07954	Q07954	LRP1	4.41	5.08e-07	0.493
VGLGFELEA	Q9Y277	Q9Y277	VDAC3	6.59	5.1e-07	0.494
EVQMGDFVR	Q96AY3;K7ELI6;K7EM43	Q96AY3	FKBP10	5.71	5.18e-07	0.495
EAIEVFMK	P32456;Q96PP8;E7ETN8	P32456	GBP2;GBP5	6.27	5.22e-07	0.496
ASLAQFEQK	G3V5X4;Q8WXH0;A0A0C4DGK3;G3V4T3	Q8WXH0	SYNE2	4.78	5.24e-07	0.496
NHEEEISTLR	CON__P08727;P08727;C9JM50;K7EMS3	CON__P08727	KRT19	5.65	5.26e-07	0.497
GFSVASTVQSHTK	Q96PP8;E7ETN8	Q96PP8	GBP5	6.29	5.35e-07	0.498
QGSVTTFLAK	P98095	P98095	FBLN2	5.7	5.41e-07	0.499
HTFSGVASVESSSGEAFHVGK	CON__P12763	CON__P12763		6.79	5.51e-07	0.501
AAQGEPQVQFK	P62826;B5MDF5;A0A087X0W0	P62826	RAN	4.73	5.55e-07	0.502
DTSTSTVYMELSSLR	sp|A008541|abysis_8541;sp|A049259|abysis_49259;sp|A031437|abysis_31437;sp|A040320|abysis_40320;sp|A015149|abysis_15149;sp|A031436|abysis_31436;sp|A075038|abysis_75038;sp|A077020|abysis_77020;sp|A076465|abysis_76465;sp|A010809|abysis_10809;sp|A075483|abysis_75483;sp|A075472|abysis_75472;sp|A075860|abysis_75860;sp|A010306|abysis_10306;sp|A075428|abysis_75428;sp|A075481|abysis_75481;sp|A066798|abysi…	sp|A008541|abysis_8541		5.62	5.57e-07	0.502
VSVFVPPR	sp|A008822|abysis_8822;P01871;sp|A057527|abysis_57527;sp|A034261|abysis_34261;sp|A081288|abysis_81288;sp|A081302|abysis_81302	sp|A034261|abysis_34261	IGHM	7.02	5.58e-07	0.502
GYNFTTTAER	Q562R1	Q562R1	ACTBL2	5.31	5.7e-07	0.504
RPMKDETHFEVVESGR	P04275	P04275	VWF	4.65	5.74e-07	0.505
LTVSNVLK	P02786;G3V0E5	P02786	TFRC	5.25	5.79e-07	0.506
NGFLMR	P12111;E7ENL6	P12111	COL6A3	6.16	6e-07	0.509
AATSRYTLNFEAAQK	P13611;E9PF17;D6RGZ6;Q86W61	P13611	VCAN	5.11	6.06e-07	0.51
LAVILEELR	G3V207;Q9ULS5	G3V207	TMCC3	5.44	6.1e-07	0.51
SSMTFLTR	Q9Y3I0	Q9Y3I0	RTCB	5.45	6.16e-07	0.511
AINPINTFTK	Q07960	Q07960	ARHGAP1	7.67	6.27e-07	0.513
RVNAIEHVIIPR	Q9Y5K8;G3V2V6;G3V2S6;H0YJH8	Q9Y5K8	ATP6V1D	4.5	6.32e-07	0.514
GQPFDVGPR	P27361;E9PQW4;E9PBK7;E9PJF0	P27361	MAPK3	5.25	6.36e-07	0.514
IKDLAHQFTQVQR	P28907;H0Y950	P28907	CD38	5.28	6.37e-07	0.514
ADGELNVDSLITR	P62140;C9JP48;C9J9S3	P62140	PPP1CB	5.98	6.4e-07	0.515
QSEPFFK	P11413;E7EUI8;E7EM57;E9PD92	P11413	G6PD	5.29	6.43e-07	0.515
VAAAVPVIISR	C9JCC6;Q14919;E9PQX9;E9PNC7	C9JCC6	DRAP1	5.13	6.58e-07	0.517
LNLSTRPEK	P26639	P26639	TARS	5.97	6.58e-07	0.517
EAVGGLQTVR	A0A0G2JLV0;A0A140T9S0;X5CMH5;A0A087WYD6;Q03519;E7ENX8	X5CMH5	TAP2	5.57	6.6e-07	0.517
VLVEDTK	Q9Y490	Q9Y490	TLN1	6.2	6.6e-07	0.517
EVYTFASEPNDVFFK	P12111;E7ENL6;A0A804HKC7	P12111	COL6A3	5.9	6.74e-07	0.519
RIPADTFAALK	P46940;A0A0J9YXZ5	P46940	IQGAP1	5.98	6.82e-07	0.52
RGLNVDQLNMLGEK	P42224;A0A669KB68;A0A669KB56;A0A669KBA4;A0A669KB53;A0A669KBI6;J3KPM9;A0A669KB52;A0A669KB75	P42224	STAT1	4.81	6.86e-07	0.521
NYKPVVQTTGNAR	Q6PIU2;A0A0A0MTJ9	Q6PIU2	NCEH1	5.22	6.95e-07	0.522
VMVLNR	Q99536;K7ERT7;Q9NQW1	Q99536	VAT1;SEC31B	5.34	6.99e-07	0.522
LDAPSQIEVK	F5H7V9;J3QSU6;P24821;E9PC84	P24821	TNC	4.38	7.04e-07	0.523
DSLYLQMNSLR	sp|A081263|abysis_81263;sp|A055106|abysis_55106;sp|A019291|abysis_19291;sp|A038823|abysis_38823;sp|A044081|abysis_44081;sp|A018797|abysis_18797;sp|A012647|abysis_12647;sp|A050285|abysis_50285;sp|A032938|abysis_32938;sp|A018503|abysis_18503;sp|A060138|abysis_60138	sp|A081263|abysis_81263		4.88	7.13e-07	0.524
IQMSNLMNQAR	P36543;C9J8H1	P36543	ATP6V1E1	6.67	7.15e-07	0.524
LETMFR	P07384	P07384	CAPN1	5.4	7.23e-07	0.525
LLTFMGMAVENK	Q7L2H7;H0YCQ8	Q7L2H7	EIF3M	5.39	7.29e-07	0.526
SVGIVTTTR	P05186	P05186	ALPL	6.08	7.47e-07	0.528
SIPAITR	Q9BUN8;B4E1G1	Q9BUN8	DERL1	4.22	7.53e-07	0.529
NSLTLEAVKR	Q96G03;E7ENQ8;E9PD70	Q96G03	PGM2	4.38	7.66e-07	0.53
LGAQALLGAAK	P32322;J3KQ22;J3QL24;J3QKT4	P32322	PYCR1	4.4	7.68e-07	0.531
DGVPGGPGETGKNGGFGR	P12111	P12111	COL6A3	6.78	7.76e-07	0.532
MDDTLFQLK	F5H875;A0A6Q8PF35;F8VUA2;Q9HD42;F8VVT7;A0A6Q8PGM8;A0A6Q8PFF9;A0A6Q8PHU0;A0A6Q8PFF8;A0A6Q8PGI9;A0A6Q8PF26	F5H875	CHMP1A	4.49	7.77e-07	0.532
LPVSEGVFVVK	O00754;M0R174	O00754	MAN2B1	5.44	7.93e-07	0.533
MISGMYLGEIVR	P52790;P19367;E9PB90;P52789	P19367	HK3;HK1;HK2	4.51	8e-07	0.534
VREITENLMATGDLDQDGR	P13796;Q5TBN3	P13796	LCP1	6.22	8.02e-07	0.534
FTVTQR	P98160	P98160	HSPG2	5.03	8.07e-07	0.535
VSLMPATLAR	A0A0G2JKZ1;A2AB90;A0A0G2JH37;A0A0A0MSV9;O15533;A0A0A0MT98	A0A0G2JKZ1	TAPBP	6.17	8.09e-07	0.535
SIILNHVIR	Q5JVZ5;Q96JJ3;Q5JVZ8;Q5JVZ4	Q5JVZ5	ELMO2	4.66	8.15e-07	0.536
NVIAALNSR	A0A8I5KW55;Q8N766;H7C5A2;A0A8I5KRL9;A0A8I5KQA0;A0A8I5KTE8;A0A8I5KXE1;A0A8I5KWE3;Q5TG59	A0A8I5KW55	EMC1	5.18	8.15e-07	0.536
FSSLVAATVR	P52790	P52790	HK3	5.61	8.19e-07	0.536
ALTMFR	K7ERZ3;O60664	O60664	PLIN3	5.98	8.25e-07	0.537
LAAAQAAGLAAAHSVR	Q6QNY0;K7EN58	Q6QNY0	BLOC1S3	5.2	8.29e-07	0.537
TKFETEQALR	CON__Q04695;Q04695;CON__P08727;P08727;C9JM50	CON__P08727	KRT17;KRT19	8.71	8.3e-07	0.537
GLAFTDVDVDSIK	P02751	P02751	FN1	5.73	8.4e-07	0.538
AEVVLGNIIK	Q13303;A0A590UJB6;A0A5F9UN28;Q5TG84;A0A590UJY1;Q5TG81;Q5TG78;A0A590UJU4;A0A590UJB8;A0A590UJJ4;A0A590UJV4;A0A590UK89;A0A590UJU1	Q13303	KCNAB2	5.45	8.53e-07	0.539
VDQSILTGESVSVTK	Q93084	Q93084	ATP2A3	4.73	8.59e-07	0.54
EMIFEDTNLK	P18031;B4DSN5	P18031	PTPN1	4.91	8.62e-07	0.54
AGLSDLELR	Q8NC56;D6RBV0	Q8NC56	LEMD2	4.59	8.74e-07	0.541
GQISETLK	P19367	P19367	HK1	4.64	8.91e-07	0.543
LPEAAFLAR	H0YAC7;H0Y938;P35606;A0A7I2V258	H0YAC7	COPB2	6.32	9.01e-07	0.544
LQSQVISELDACK	Q9BXX0	Q9BXX0	EMILIN2	5.01	9.03e-07	0.544
SSLLEKGLDGAKK	P81605	P81605	DCD	5.38	9.05e-07	0.544
IATEAIENFR	P08183	P08183	ABCB1	4.97	9.06e-07	0.544
MVFTPK	P48735;H0YL11	P48735	IDH2	5.34	9.08e-07	0.545
VILKNSQGEEVAQR	P20700	P20700	LMNB1	5.1	9.08e-07	0.545
EQALADLNSVER	O75410;E7EVI4;E7ET87;H0YAY0;H0YBT8;B4E3H6	O75410	TACC1	4.83	9.34e-07	0.547
SAFVVER	A0A7I2YQR5;A0A7I2V444;A0A7I2V3V0;P40763;A0A7I2V4C8;A0A7I2V5N9;A0A7I2V4R2;A0A7I2V4R3;G8JLH9;A0A7I2V2T1;A0A7I2V4F6;A0A7I2YQI1;A0A7I2V395;A0A7I2V2G1;A0A7I2YQD2;A0A7I2V552	A0A7I2YQR5	STAT3	5.11	9.51e-07	0.548
MLISILTER	D6RA82;P12429;D6RFG5;D6RCA8;D6RAZ8	P12429	ANXA3	6.1	9.52e-07	0.548
EVTDEIVKEFMTPR	P23381	P23381	WARS	5.69	9.53e-07	0.549
VFVGGDDFK	Q9NPH2	Q9NPH2	ISYNA1	5.12	9.72e-07	0.55
VNQLVQTLIVQPDR	P98171;E7EQN5;E9PCM6;H7C2Z8	P98171	ARHGAP4	4.36	9.78e-07	0.551
EMFPIEAGAINPENR	A6NI72;A8MVU1;P14598;C9J155;H7C1S1	P14598	NCF1B;NCF1C;NCF1	5.51	9.8e-07	0.551
SISGAFPGIESK	P22894	P22894	MMP8	5.08	9.89e-07	0.552
SAGFHPSGSVLAVGTVTGR	K7EIK7;K7EII6;K7ELB2;O95834	O95834	EML2	4.94	9.92e-07	0.552
VMFTEDLK	P07858;E9PHZ5;A0A7I2V440;A0A7P0NGZ6;A0A7I2YQK9;E9PR21;E9PQM1;E9PSG5;A0A7I2V4Z9;E9PNL5;E9PLY3;E9PKQ7;A0A7I2V4S6;A0A7I2V302;E9PCB3;A0A7I2V2J1;E9PS78	P07858	CTSB	4.82	9.95e-07	0.552
SLESALK	O15143	O15143	ARPC1B	6.1	1e-06	0.552
RQSGQTDPLQKEELQSGVDAANSAAQQYQR	P46940;A0A0J9YXZ5	P46940	IQGAP1	4.48	1e-06	0.553
ALQEELQFSSK	A0A3B3IPE9;A0A087WZG4;Q6ZSZ5;A0A804CAZ4;A0A590UK10	A0A3B3IPE9	ARHGEF18	4.27	1.01e-06	0.553
DAGEGLLAVQITDPEGKPK	P21333;Q60FE5	P21333	FLNA	6.24	1.01e-06	0.553
NGVPAVGLK	A0A3B3ISC6;A0A3B3ITI7;P53621;A0A3B3IT15;A0A3B3IS84	P53621	COPA	4.35	1.02e-06	0.554
GEADDLKSEGPYFSLTSTEQSVK	Q14112	Q14112	NID2	4.5	1.02e-06	0.554
ESVSHAILQTDQALTETEKK	Q96PP8	Q96PP8	GBP5	4.88	1.03e-06	0.555
FKDNPTVVVEDLR	Q15057;A0A0U1RQT1;H7C3Q8	Q15057	ACAP2	4.69	1.04e-06	0.556
GVFVLNK	P01024;CON__Q2UVX4	P01024	C3	5.97	1.06e-06	0.558
SEVTDLR	CON__P08727;P08727;K7EMS3;Q99456;CON__Q99456	CON__P08727	KRT19;KRT12	5.97	1.08e-06	0.559
LALLQVR	P19367;Q2TB90	Q2TB90	HK1;HKDC1	5.63	1.09e-06	0.56
VLATSSGVHSLASGTGHVQVAR	Q9BZZ2;H7C0M6	Q9BZZ2	SIGLEC1	4.88	1.11e-06	0.562
PYMASLQMR	P24158	P24158	PRTN3	5.07	1.12e-06	0.564
SSMNPEYDYLFK	P62820;E7END7	P62820	RAB1A	5.26	1.13e-06	0.564
DLSTPAQYALMEK	Q9BZG1;C9JBG0;C9JY26;Q96PJ7;E7ES60	Q9BZG1	RAB34	4.61	1.13e-06	0.564
IIGLKPEGVPR	P54709;C9JA36;H7C4L9	P54709	ATP1B3	5.36	1.15e-06	0.566
HPASEAEIQPQTQVTLR	Q13308;Q86X91;F8WDG7	Q13308	PTK7	4.65	1.15e-06	0.566
DAQEKLELAEK	A0A0S2Z4G6;P09493;H0YKP3;A0A087WTJ7;Q6ZN40;A0A2R2Y2Q3;A0A494C0P6;J3KN67;P06753	Q6ZN40	TPM1;TPM3	4.95	1.15e-06	0.566
VTVLSQPK	sp|A043323|abysis_43323;sp|A037355|abysis_37355;sp|A015734|abysis_15734;sp|A014855|abysis_14855	sp|A043323|abysis_43323		5.52	1.17e-06	0.568
AIFEIVLNR	O75643;A0A494C1A5	O75643	SNRNP200	4.82	1.17e-06	0.567
AAPQDVHVR	Q12981	Q12981	BNIP1	4.88	1.21e-06	0.571
VSAPDGPCPTGFER	A0A0C4DH07;Q8N2S1	A0A0C4DH07	LTBP4	5.29	1.21e-06	0.572
VIVFDGVPSK	P61221	P61221	ABCE1	4.71	1.22e-06	0.572
LQGLPIVAGTMDIR	Q9NTZ6;A6PVI1;A6PVI0;Q5JX62	Q9NTZ6	RBM12	5.05	1.22e-06	0.573
TSGSEMALSTGDVVEVVEK	A6NI72;A8MVU1;P14598	P14598	NCF1B;NCF1C;NCF1	5	1.23e-06	0.574
ALVMLLEVR	O14787;A0A075B780;Q92973;A0A7P0TBF0;A0A7P0Z4D3;A0A7P0T9C0	Q92973	TNPO2;TNPO1	5.3	1.23e-06	0.573
KALEEAGFK	P17655	P17655	CAPN2	4.91	1.27e-06	0.576
DIQDLK	A0A804F6T5;A0A804F729;P14618;B4DNK4	P14618	PKM	6.26	1.28e-06	0.577
LAGAPSEDPQFPK	O00391	O00391	QSOX1	5.48	1.28e-06	0.577
VQDNFDKIEFNR	Q9UH65	Q9UH65	SWAP70	5.19	1.29e-06	0.579
ERNGLSLAALKK	P16401	P16401	HIST1H1B	6.56	1.3e-06	0.579
LTLLNPK	P53396	P53396	ACLY	5.97	1.32e-06	0.581
SFAGAVSPQEEEEFRR	P33992;B1AHB1	P33992	MCM5	4.78	1.33e-06	0.582
DITLEASR	P63151;A0A590UJY3;A0A590UJJ1;E5RFR9	P63151	PPP2R2A	4.65	1.33e-06	0.582
STLLFGQR	P33176	P33176	KIF5B	5.64	1.35e-06	0.583
IIAPANMERPVR	Q8IZP0;A0A0A0MRT6;B6VEX4	Q8IZP0	ABI1	5.17	1.38e-06	0.586
ALALGALQNIR	D6RGG3;Q99715;H0Y5N9	D6RGG3	COL12A1	5.66	1.44e-06	0.59
GPVLQLHDLKR	P43121	P43121	MCAM	4.24	1.49e-06	0.594
SFENISK	P61026	P61026	RAB10	5.82	1.49e-06	0.594
GSLGGGFSSGGFSGGSFSR	A0A1B0GVI3;CON__P13645;P13645	A0A1B0GVI3	KRT10	6.67	1.51e-06	0.596
ASGVAVSDGVIK	P23528;E9PP50;E9PS23	P23528	CFL1	6.2	1.52e-06	0.596
LVNSLYPDGSKPVK	Q01995;H0YCU9;E9PJ32	Q01995	TAGLN	8.63	1.54e-06	0.598
KFESLFPGK	Q13045	Q13045	FLII	4.45	1.58e-06	0.6
NVIFQPVAELKK	Q01813;A0A7I2V3Z0;B1APP6;H0Y757	Q01813	PFKP	5.15	1.58e-06	0.6
ASVHTLSGHTNAVATVR	O43660;H0YA24	O43660	PLRG1	5.04	1.58e-06	0.601
AATAAEAVASGSGEPR	Q9NWT6;E9PNR8	Q9NWT6	HIF1AN	4.38	1.59e-06	0.601
FTEGPPLHKDDVNGIR	P14780	P14780	MMP9	5.12	1.6e-06	0.602
NSIAYMDQASGNVK	P02461	P02461	COL3A1	5.46	1.61e-06	0.602
LTFDEYR	D6RA82;P12429	P12429	ANXA3	6.01	1.64e-06	0.604
GTLEPVEK	P54652;P34931;Q53FA3	P54652	HSPA2;HSPA1L	5.62	1.64e-06	0.604
AADLQLEMTQKPHK	O15382;M0QXF9;M0QZ10	O15382	BCAT2	4.37	1.65e-06	0.605
NGELENIKPK	P68402	P68402	PAFAH1B2	5.21	1.66e-06	0.606
VAVPIEDMQR	Q92608;E5RFJ0	Q92608	DOCK2	4.82	1.67e-06	0.606
LEDLLR	P12956;B1AHC9	P12956	XRCC6	5.33	1.67e-06	0.606
AAIYGGVEGGGTR	Q9UJ70;H7C3G9;H7C1L7	Q9UJ70	NAGK	6.7	1.68e-06	0.607
AGDVIFLLSR	Q15080;A0A0G2JR51;A0A494BZS1;A0A217FLJ2;B0QY04	Q15080	NCF4	5.11	1.69e-06	0.608
AAGMSSPGAQSHPEELPR	M0R0P8;Q13459;M0R300;M0R2J3;M0QZY4	M0R0P8	MYO9B	5.1	1.7e-06	0.608
KADFQHPAGAVGPEPTDR	A8MVE2;A0A0G2JQ46;A0A0B4J1W1;A0A0G2JQ44;A0A087WSX8;A0A0G2JNM2;A0A0G2JQ15;Q8NHL6;A0A0G2JNQ7;Q8N423;A0A0G2JNT8;A0A0G2JN35;A0A0G2JPH5;A0A0G2JM05;A0A0G2JLS7;H7C0C3	A8MVE2	LILRB1;LILRB2	4.48	1.71e-06	0.609
SLVSNLR	P80217	P80217	IFI35	5.25	1.73e-06	0.61
ATVSAPFGK	E9PMV1;A0A8I5KUE3;A0A8I5KYZ1;A0A8I5KSD5;H0YDN1;Q15149	Q15149	PLEC	5.8	1.73e-06	0.61
GSLHGDKPLTINR	Q14005;A0A8C8KBU6;H0YLH9	Q14005	IL16	4.74	1.74e-06	0.611
ITYVPITGGTPSMVTVDGTK	F5H7V9;J3QSU6;H0YGZ3;P24821;E9PC84	P24821	TNC	5.8	1.74e-06	0.61
IMSIPNLR	Q9UJW0	Q9UJW0	DCTN4	4.45	1.77e-06	0.612
ISGSGGSTYYADSVK	sp|A028884|abysis_28884;sp|A041656|abysis_41656	sp|A028884|abysis_28884		5.09	1.8e-06	0.614
INMLVIELK	Q14204;A0A2R8Y706;A0A7P0T9C4;A0A7P0TA13;A0A2R8Y5T0;A0A7P0T9R4;A0A7P0TAW9;A0A7P0T7V5;A0A7P0T916;A0A7P0T8N2;A0A7P0TBJ7;A0A7P0TAF3;A0A7P0TB75;A0A2R8Y6H2;A0A7P0T9K2;A0A7P0T9F1;A0A7P0T8W5;A0A2R8YFZ7;A0A7P0TAM4;A0A7P0T825;A0A7P0TB64;A0A7P0TAV5;A0A7P0T990;A0A804HHY6;A0A2R8YGC7;A0A7P0T942;A0A7P0T9S3;A0A7P0T934	Q14204	DYNC1H1	4.89	1.81e-06	0.615
AGVAPLQVK	P21333;Q60FE5	P21333	FLNA	8.25	1.81e-06	0.615
GSFPENLR	P04233	P04233	CD74	6.1	1.83e-06	0.616
GNTATQMAQALSLNTEEDIHR	P50453	P50453	SERPINB9	5.1	1.83e-06	0.616
QFAAATIQTIGR	O00203	O00203	AP3B1	4.43	1.89e-06	0.619
LKLEDFFAR	P11413;E7EUI8;E7EM57;E9PD92	P11413	G6PD	5.19	1.89e-06	0.619
DSFDIIK	P23142;CON__ENSEMBL:ENSBTAP00000016046;A0A0U1RRA4	P23142	FBLN1	6.23	1.92e-06	0.621
SLTELFVK	Q96Q11;A0A494C181;A0A494C1D4;F8W8C3;A0A494C0A0;A0A494C0Y2;C9JRS7	Q96Q11	TRNT1	4.42	1.93e-06	0.621
LSHIAEDVGR	P98171;E7EQN5;E9PCM6;A0A0B4J1X7;S4R314;S4R352;C9JLA8;C9J5M2;F8WAR0	P98171	ARHGAP4	4.97	1.97e-06	0.623
LGSLSER	O60664	O60664	PLIN3	5.63	1.97e-06	0.623
TEGKIEELLPGSSIDAETR	P50453	P50453	SERPINB9	5.18	1.97e-06	0.624
FDSDAAIPR	A0A0G2JH66;A0A140T9B7;A0A0G2JPA3;D0EV57;A0A140T8X0;A0A140T9V0;P30511;A0A140T9J8;A0A0G2JNV5;A0A140T9K3;A0A140T9P9;A0A140T908;A0A140T925;A0A140T9A3;A0A140T9M4	A0A0G2JH66	HLA-F	5.45	2e-06	0.625
MEALIPVINK	O00429;F8VZ52;B4DDQ3;B4DPZ9;F8W1W3;F8VR28;F8VUJ9	O00429	DNM1L	4.23	2.01e-06	0.625
FVPNLPK	Q9NY33;G3V1D3;G3V180;E9PQ14;E9PPK9;E9PNX5	Q9NY33	DPP3	4.82	2.01e-06	0.625
ILMGSTLR	P10644;K7EM13;K7EPB2;K7EKR1;P31321;H7BYW5;C9JSK5	P10644	PRKAR1A;PRKAR1B	5.38	2.03e-06	0.626
FDSDVGEFR	P04440;H0Y7G7;A0A140T9P1;A0A140T976;H0Y5P2;A0A140T9Y0;A0A140T9I3;A0A0G2JII1;Q5Y7D1;A0A5S8K7D6;A0A5S8K798;A0A182DWE9;A0A140T915;A0A140T9Y2;A0A140T9T6;P01911;A0A140T8Z7;A0A140T9P7;Q5EP54;A0A182DWG2;A0A182DWF5;A0A140T9A5;A0A140T966;A0A140T9Q1;A0A140T928;A0A182DWF4;A0A0G2JJV3;A0A140T9S8;A0A140T9T0	P01911	HLA-DPB1;HLA-DRB1	5.74	2.06e-06	0.628
GMTPAEAEMHFLENAK	A0A0A0MRA8;Q9Y2J2;A0A1B0GTF8;A8K968	A0A0A0MRA8	EPB41L3	4.62	2.08e-06	0.629
AELTVEVR	P51114;E9PFF5;C9JYQ6	P51114	FXR1	4.17	2.09e-06	0.629
ALASGGSALDAVESGCAMCER	P20933	P20933	AGA	4.79	2.11e-06	0.63
RLVVLATPQVSDSMR	P46976;C9JQ42;G5E9W8	P46976	GYG1	5.93	2.12e-06	0.631
VDALMDEINFMK	CON__P13647;P13647;H0YIN9	CON__P13647	KRT5	5.32	2.13e-06	0.631
VAVVGNVDAGK	O00178;F5H716	O00178	GTPBP1	5.23	2.17e-06	0.633
AAGSDGTELFDQVHR	Q7L1T6;A0A0A0MRM6	Q7L1T6	CYB5R4	4.41	2.18e-06	0.633
GSSGVGLTAAVLR	P33993	P33993	MCM7	5.7	2.18e-06	0.634
AEKENPGLTQDIIMK	Q9BUL8;C9J5C3;C9J6F3;H7C5M9;C9JSA3;C9JND6;C9J932	Q9BUL8	PDCD10	4.68	2.18e-06	0.634
TKDGQILPVPNVVVR	Q9P258	Q9P258	RCC2	5.12	2.24e-06	0.636
GVFSGLR	P21810;C9JKG1	P21810	BGN	7.76	2.25e-06	0.637
VFTTGFSR	Q9BR76;A0A087WW53;F5H390	Q9BR76	CORO1B	6.61	2.25e-06	0.637
HVATEYQENK	O95239	O95239	KIF4A	7.23	2.28e-06	0.638
FAYLGR	P40429;M0QYS1;A0A7I2V2L9;A0A7I2V5L3;Q8J015	P40429	RPL13A;RPL13a	6.19	2.29e-06	0.638
ALASIDSK	P18206	P18206	VCL	5.33	2.3e-06	0.639
VLSTTKPFEYETPEMEK	Q16666;H3BR88;H3BR65	Q16666	IFI16	5.06	2.33e-06	0.64
QSSDPMLSEFK	M0QZR4;Q92888;M0QYC1;M0R2C7	M0QZR4	ARHGEF1	4.33	2.36e-06	0.641
VAIFIEK	Q9P258	Q9P258	RCC2	3.86	2.36e-06	0.642
LGAGPDGVEEIKR	P51812;B1AXG1;B7ZB17;B4DG22	P51812	RPS6KA3	5.4	2.36e-06	0.641
QPQFISR	P04004	P04004	VTN	4.62	2.37e-06	0.642
HNLNIVIK	Q5Y7H0	Q5Y7H0	HLA-DQA1	4.99	2.4e-06	0.643
SPVDVLQIFR	Q9UKK3	Q9UKK3	PARP4	4.35	2.4e-06	0.643
GFMVTR	P50454;E9PJH8;E9PPV6;E9PR70;E9PK86;E9PMI5;E9PKH2	P50454	SERPINH1	5.68	2.4e-06	0.643
NSIAYMDEETGNLKK	P08123	P08123	COL1A2	4.96	2.47e-06	0.646
ALTDFFR	H7BXD5;P28676;H7C2Z6	H7BXD5	GCA	5.68	2.48e-06	0.646
DQLRPTQLLQNVAR	Q9NZM1;H0YD14	Q9NZM1	MYOF	4.86	2.48e-06	0.646
GTSQKDETFNLPR	P32455;A0A7P0TAZ1	P32455	GBP1	6.19	2.52e-06	0.648
FLLSESGSTK	Q2TB90	Q2TB90	HKDC1	3.9	2.59e-06	0.65
ADAEVIILPK	O60832;C9IYT0	O60832	DKC1	4.5	2.61e-06	0.651
SSTTSMTSVPKPLK	Q13200;C9JPC0;H7C2Q3	Q13200	PSMD2	5.96	2.61e-06	0.651
DIVTVANAVFVK	P07093;C9JN98	P07093	SERPINE2	4.64	2.61e-06	0.651
AVLGAVPR	P54802	P54802	NAGLU	4.18	2.63e-06	0.652
FTSDTKPIINK	Q8N1F7;H3BVG0	Q8N1F7	NUP93	4.24	2.64e-06	0.652
GQTEGKIPELLASGMVDNMTK	P30740	P30740	SERPINB1	4.34	2.65e-06	0.653
DFPETNNILK	P49915	P49915	GMPS	4.77	2.66e-06	0.653
GFQALGDAADIR	Q5H9A7;P01033;Q5H9B5;Q5H9B4	Q5H9A7	TIMP1	5.64	2.66e-06	0.653
MSASDPNSSIFLTDTAK	P23381;H0YJP3	P23381	WARS	4.36	2.66e-06	0.653
AAPSAEFSVDR	Q9HCB6	Q9HCB6	SPON1	4.39	2.68e-06	0.654
VNYNFEDETVRK	P29728;A0A087X0V5;F8W1C5;A0A7P0T8H9	P29728	OAS2	4.96	2.71e-06	0.655
EGQKPPEGFMAPK	O43252	O43252	PAPSS1	4.12	2.73e-06	0.655
GQSPTVVLGAHSLSK	P49863	P49863	GZMK	4.62	2.74e-06	0.656
TAAENEFVVLK	CON__P08729;Q14CN4;CON__Q14CN4-1;CON__Q3KNV1;P08729;CON__Q6IME9	CON__Q3KNV1	KRT72;KRT7	8.28	2.75e-06	0.656
NVFSTFR	F5H6I7;Q6DD88	Q6DD88	ATL3	4.32	2.76e-06	0.656
SETAPLAPTIPAPAEK	P16402	P16402	HIST1H1D	6.26	2.78e-06	0.657
GDNITLLQSVSN	P62304;A6NHK2	P62304	SNRPE	6.17	2.8e-06	0.658
GLQVYIR	Q9BZZ5;G3V1C3;H0YER7	Q9BZZ5	API5	4.8	2.84e-06	0.659
AVIFTQVSR	H3BN02;P20702;Q13349	H3BN02	ITGAX;ITGAD	4.51	2.86e-06	0.66
ATAPFKYESPENGK	P41218	P41218	MNDA	4.49	2.86e-06	0.66
MLVGDIIQIR	Q92608;E5RFJ0;A0A3B3ISB1	Q92608	DOCK2	4.62	2.87e-06	0.66
GRQDGSESEAVAVALAGR	Q92619;K7ES98;K7EM85;F5H1R4;K7ES92;A0A087X1A3	Q92619	HMHA1	4.49	2.88e-06	0.66
LNSHMNALHLGSQANR	P11413;E7EUI8;E7EM57;E9PD92	P11413	G6PD	5	2.92e-06	0.662
EIQDAVAR	A0A0G2JLV0;A0A140T9S0;X5CMH5;A0A087WYD6;Q03519;E7ENX8	X5CMH5	TAP2	5.69	2.92e-06	0.661
NLVPVQR	P23497;E9PHV6;C9JBL0	P23497	SP100	4.38	2.94e-06	0.662
GQIQLDPQTVETK	I3L4Y1;Q12979;A0A1C7CYZ0;A0A0G2JQ41;B7Z683;I3L379	I3L4Y1	ABR	4.02	2.96e-06	0.663
EIFDFSPEEHLK	G3V5X4;Q8WXH0;A0A0C4DGK3	Q8WXH0	SYNE2	4.2	2.96e-06	0.663
VLPALLPS	P16930	P16930	FAH	4.65	3.02e-06	0.665
LNSLTLAR	A0A8I5KUD9;Q9UQ13;A0A8I5QJS4	A0A8I5KUD9	SHOC2	3.91	3.02e-06	0.665
SETVICSSR	P50552;K7ENL7;K7ENR7;K7EIG8	P50552	VASP	4.8	3.07e-06	0.666
ADIQTER	P62280;M0QZC5;M0R1H6	P62280	RPS11	5.61	3.08e-06	0.667
GIEEVGIYR	I3L4Y1;Q12979;A0A1C7CYZ0;A0A0G2JQ41;B7Z683	I3L4Y1	ABR	4.17	3.09e-06	0.667
SVVSGSINTVLGSR	Q99541	Q99541	PLIN2	5.67	3.1e-06	0.667
GKLEAIITPPPAK	A0A8I5KS04;O75367;A0A8I5KRC6;D6RCF2	O75367	H2AFY	5.58	3.11e-06	0.667
LINNAIKNDLASR	O95782;A0A0G2JQP3;A0A0G2JRP9;O94973;A0A0G2JS82;A0A8I5KPP9;A0A0G2JRF9;A0A0G2JQA4;E9PPY8;E9PQP4;A0A0G2JQT9;A0A0G2JS17;A0A0G2JQF7;A0A0G2JQV2;A0A0G2JQM1	O95782	AP2A1;AP2A2	3.91	3.12e-06	0.668
APTAQVESFR	F5H7V9;J3QSU6;H0YGZ3;P24821;E9PC84	P24821	TNC	7.24	3.12e-06	0.668
ELTSELK	X6R8F3;P80188	X6R8F3	LCN2	4.55	3.14e-06	0.668
LSCAASGFTFSR	sp|A024253|abysis_24253;sp|A029395|abysis_29395;sp|A050237|abysis_50237;sp|A028036|abysis_28036;sp|A025080|abysis_25080;sp|A024767|abysis_24767;sp|A029506|abysis_29506;sp|A048023|abysis_48023;sp|A055989|abysis_55989;sp|A046986|abysis_46986;sp|A030462|abysis_30462;sp|A036471|abysis_36471;sp|A056997|abysis_56997;sp|A086350|abysis_86350;sp|A000504|abysis_504;sp|A028190|abysis_28190;sp|A028248|abysis…	sp|A024253|abysis_24253		4.29	3.15e-06	0.668
ALQNAVTTFVNR	O14964;A0A7I2V2R9;A0A7I2V5A3;A0A7I2V2D8;A0A7I2V2W5;A0A7I2V2K2;A0A7I2V3J3;A0A7I2V5A2;A0A7I2V307;A0A7I2V3F9;A0A7I2V3I8;A0A7I2V637;A0A7I2V6E0;A0A7I2V3Z1;I3L1P5;A0A7I2YQD1;A0A7I2V331	O14964	HGS	6.13	3.18e-06	0.67
SLLSLPEKEDK	Q8IX12;A0A0C4DGG8;F5H1H2	Q8IX12	CCAR1	4.16	3.21e-06	0.67
MEIPPTNYPASR	Q9BS40	Q9BS40	LXN	4.34	3.24e-06	0.671
AKQEELEAALQR	CON__P08729;CON__Q3KNV1;P08729	CON__Q3KNV1	KRT7	7.63	3.25e-06	0.672
VLDEFSK	A0A7I2V4L6;O15498;A0A7I2V3A1;A0A7I2V3V7	A0A7I2V4L6	YKT6	4.11	3.25e-06	0.671
GLSPAQADSQFLENAK	E9PHY5;E9PK52;E9PII3;A0A2R8Y5B3;O43491	O43491	EPB41L2	4.58	3.27e-06	0.672
TVEETQVPEISGVAR	Q8TDZ2	Q8TDZ2	MICAL1	4.18	3.29e-06	0.672
VPGDVSLQLSTLEMDDR	Q9Y279;A0A494C0F5;H7C062	Q9Y279	VSIG4	5.12	3.29e-06	0.673
MDLYSTPAAALDR	Q9Y6K5;A0A7P0T9W6;A0A7P0T9J0;A0A7P0Z4D0;A0A7P0T8S7;A0A7P0TAU8;A0A7P0Z4F1;A0A7P0TAC0;A0A7P0Z4F5;A0A7P0T7V2;A0A7P0TAS0;A0A7P0TB73;A0A7P0TAC8;A0A7P0TAV3;A0A7P0T8J8;A0A7P0TA50;F8VS35;A0A7P0T9Z5;A0A7P0TAT5;F8VWK9;A0A7P0TA44;A0A7P0T884;A0A7P0TB72;A0A7P0Z4Q3	Q9Y6K5	OAS3	3.85	3.3e-06	0.673
VTEENKELANELR	P07996;CON__Q28194	P07996	THBS1	5.15	3.35e-06	0.674
SKESVSHAILQTDQALTETEK	Q96PP8	Q96PP8	GBP5	4.45	3.37e-06	0.675
AALVAQNYINYQQGTPHR	Q9BS40	Q9BS40	LXN	4.77	3.37e-06	0.675
LRLPLDKEPAR	E9PMV1;A0A8I5KUE3;A0A8I5KYZ1;A0A8I5KSD5;H0YDN1;Q15149	Q15149	PLEC	4.15	3.43e-06	0.676
GREPANEASVEYLQEVAR	A0A0A0MTR7;A0A0A0MTC1;Q63HN8	A0A0A0MTR7	RNF213	4.12	3.46e-06	0.677
VKDLVLSVHNR	A0A499FI31;Q15020	A0A499FI31	SART3	4.01	3.46e-06	0.677
LQGEIAHVK	CON__P35908;CON__P35908v2;P35908	CON__P35908v2	KRT2	4.66	3.47e-06	0.677
SETHGSLEEAMLTVVK	P13928;A0A087WTN9;Q5VT79;A0A075B752;B4DTF2;A0A087WUP0	P13928	ANXA8;ANXA8L2;ANXA8L1	4.95	3.52e-06	0.679
MVSSYVGENAEFER	P55809	P55809	OXCT1	4.63	3.52e-06	0.679
VKDRDDFPVVLVGNK	P10301	P10301	RRAS	5.03	3.54e-06	0.679
LLIYSDNQRPSGVPDR	sp|A012586|abysis_12586;sp|A085306|abysis_85306;sp|A024077|abysis_24077	sp|A012586|abysis_12586		5.02	3.55e-06	0.679
LDIDSPPITAR	A0A804F6T5;A0A804F729;P14618;B4DNK4	P14618	PKM	4.15	3.59e-06	0.68
LTIGSNLSIR	P13010	P13010	XRCC5	6.31	3.59e-06	0.68
DRDLEVDTTLK	P02452	P02452	COL1A1	4.94	3.6e-06	0.681
QQEIVVSR	Q15393;I3L4G7	Q15393	SF3B3	4.53	3.62e-06	0.681
LLLENDSLSK	Q9BZF9;H0YNH8;F5H2B9	Q9BZF9	UACA	4.44	3.72e-06	0.683
AGGAAVVITEPEHTK	Q9P258	Q9P258	RCC2	5.45	3.73e-06	0.684
DVDQMFQR	P32456	P32456	GBP2	4.39	3.75e-06	0.684
LSPQTLTTIVK	H7BXD5;P28676;H7C2Z6	H7BXD5	GCA	6.05	3.75e-06	0.684
EIVLTQSPASLSLSPGER	sp|A070453|abysis_70453;sp|A070489|abysis_70489;sp|A070475|abysis_70475;sp|A070469|abysis_70469;sp|A070446|abysis_70446	sp|A070453|abysis_70453		6.18	3.76e-06	0.684
LSVIGSIR	Q07954	Q07954	LRP1	5.75	3.77e-06	0.685
MRPFEGFQR	Q9BUJ2;A0A0A0MRA5;B7Z4B8;M0R3F1	Q9BUJ2	HNRNPUL1	4.72	3.78e-06	0.685
RFEQEINAK	O94804	O94804	STK10	4.75	3.79e-06	0.685
EDTSPAVLGLAAR	Q14112	Q14112	NID2	4.5	3.8e-06	0.685
AFDIIER	Q8N1F7;H3BVG0;H3BRD9;H3BV15	Q8N1F7	NUP93	4.14	3.8e-06	0.685
NLAMGVNLTSMSK	P12004	P12004	PCNA	5.11	3.8e-06	0.685
DMPPAFIK	P18206	P18206	VCL	5.05	3.86e-06	0.687
SALTVQFVTGSFIEK	P61225	P61225	RAP2B	5.39	3.93e-06	0.688
VLGITDMFDSSK	P07093	P07093	SERPINE2	4.59	3.93e-06	0.688
RDFAPPGQQK	Q9BVC6	Q9BVC6	TMEM109	4.46	3.93e-06	0.688
GDTVLLK	A0A7P0T8A3;A0A7P0T971;A0A7P0T946;A0A7P0T8Q5;A0A7P0Z4C6;A0A7I2V2Y2;A0A7I2V5G8;A0A7P0Z4D1;A0A7P0TBK7;C9JUP7;P55072;A0A7P0TAW3;A0A7I2V540;A0A7P0TAQ1	P55072	VCP	6.35	3.94e-06	0.688
VDGLSDDHKIETQR	Q9HB90;Q9NQL2	Q9HB90	RRAGC;RRAGD	5.7	3.96e-06	0.689
ADDYIEITGAGGK	Q9Y3Z3;A0A2R8YCS7;A0A2R8YD90	Q9Y3Z3	SAMHD1	5.83	3.96e-06	0.689
TLQELR	P07585;F8VXZ8;F8VUF6;F8VWU0	P07585	DCN	5.87	3.98e-06	0.689
KNHEEEISTLR	CON__P08727;P08727;C9JM50;K7EMS3	CON__P08727	KRT19	6.11	4e-06	0.69
MEATGVLPFVR	J3KS54;J3KS39;Q13045	Q13045	FLII	4.19	4.01e-06	0.69
NLILVVR	A0A087WVQ6;Q00610	A0A087WVQ6	CLTC	5.76	4.03e-06	0.69
LIAPVAEEEATVPNNK	A0A5F9ZHM4;P07195;A0A3B3IS95;A8MW50;C9J7H8;F5H793	A0A5F9ZHM4	LDHB	4.9	4.07e-06	0.691
AGILTTLNAR	P33993	P33993	MCM7	4.77	4.08e-06	0.691
IVFSGNLFQHQEDSKK	Q96TA1	Q96TA1	FAM129B	5.58	4.12e-06	0.692
DVKPSNILVNSR	P36507;Q02750;B4DFY5;A0A8I5KYB4;A0A8I5KXN4;A0A8I5QJ96;A0A8I5KYS7;A0A8I5QJL9;A0A8I5KVF6	P36507	MAP2K2;MAP2K1	4.65	4.14e-06	0.693
KTLSGLEVSMVTAVPGR	P00390	P00390	GSR	5	4.16e-06	0.693
QASMEDIPGR	Q9BS40	Q9BS40	LXN	6.45	4.2e-06	0.694
LIEIASR	P11047	P11047	LAMC1	5.08	4.22e-06	0.694
LVDQNLNK	O60264	O60264	SMARCA5	4.54	4.23e-06	0.695
DSEREAIEVFIR	P32455	P32455	GBP1	4.37	4.27e-06	0.695
LAQTTPVDSALGSSR	H0YLX2;A0A8C8UYX0;Q2KHR2	H0YLX2	RFX7	4.89	4.27e-06	0.695
LEMDKFPFVALSK	P05186	P05186	ALPL	4.73	4.28e-06	0.695
SFSTASAITPSVSR	CON__P13647;P13647;F8VV57;F8VU69	CON__P13647	KRT5	4.98	4.32e-06	0.696
AESAALHAGLR	O75410;E7EVI4;E7ET87;H0YAY0;H0YBT8;B4E3H6	O75410	TACC1	4.71	4.35e-06	0.697
INVTEIPDTLREDQMR	Q13287	Q13287	NMI	5.13	4.36e-06	0.697
VANPSGNLTETYVQDR	P21333;Q60FE5	P21333	FLNA	4.41	4.38e-06	0.697
GATPEDFSNLPPEQR	B7ZL14	B7ZL14	FNBP1	4.61	4.39e-06	0.698
SLPLLENQIK	A0A7P0T9R0;A0A7P0Z4E0;P20591;A0A7P0T9I6;F8W8T1;H9KVC7	P20591	MX1	5.19	4.41e-06	0.698
LVSTSVTIR	Q709C8	Q709C8	VPS13C	4.99	4.41e-06	0.698
FDASVDQASINPGK	P52790	P52790	HK3	3.91	4.43e-06	0.698
LEAEDIALTATSQK	Q9HBI0	Q9HBI0	PARVG	5.82	4.45e-06	0.699
LLASSTAASVPNTLR	Q9BZZ2;H7C0M6	Q9BZZ2	SIGLEC1	4.37	4.48e-06	0.699
GASVIIR	A0A1B0GXB1;Q9H0R4;K7ER15;K7EQD2	Q9H0R4	HDHD2	5.03	4.51e-06	0.7
TTITTTTTSSSGLGSPMIVGSPR	Q96S97;A0A494C017;C9JJV6;C9JZL8;A0A499FIY8;C9JC07	Q96S97	MYADM	5.83	4.56e-06	0.701
AGVQSGTNALLVVK	Q8N7H5	Q8N7H5	PAF1	4.98	4.56e-06	0.701
QALEQYEEVKK	E7EMB1;Q9UH65	Q9UH65	SWAP70	4.08	4.59e-06	0.701
SGIALSR	P63279;H3BQQ9;B0QYN7;H3BPC4;H3BRD1	P63279	UBE2I	4.91	4.61e-06	0.702
AGAESILANR	P15498;F5H5P4;Q96D37;A0A0A0MR07	P15498	VAV1	4.77	4.61e-06	0.702
AVEPGEGPR	Q9Y426	Q9Y426	C2CD2	6.67	4.62e-06	0.702
NDQEETTGVVSTPLIR	A0A0D5XQ77;Q29967;A0A0U5Q247;A0A140T9Y4;A0A140T981;A0A140T9V6;A0A140T911;A0A140T8Z5;A0A140T9R6;P01920	A0A0D5XQ77	HLA-DQB1	5.05	4.62e-06	0.702
ALVNQVAATVQNR	A0A7P0T8Y0;Q8IY21;A0A7P0TAZ7	A0A7P0T8Y0	DDX60	4.18	4.76e-06	0.704
LGDTPGVSYSDIAAR	Q9H269;Q5JUA9	Q9H269	VPS16	4.76	4.82e-06	0.705
AFTYINLDK	P02786;G3V0E5	P02786	TFRC	4.58	4.86e-06	0.706
DKDGPQVVPVEGHER	A0A140TA33;A0A140T902;A0A140TA41;A0A140T9C0;P22105;A0A140TA52;A0A140T8Y3;A0A140T8Z8;A0A140T956;A0A3B3ISX9	A0A3B3ISX9	TNXB	6.12	4.86e-06	0.706
FLIATGERPR	Q16881;A0A182DWI3;E9PIR7;E9PKD3	Q16881	TXNRD1	5.92	4.87e-06	0.706
QPVVDTFDIR	Q86X55;K7EQA8	Q86X55	CARM1	4.77	4.88e-06	0.706
IGLDLPALNMQR	P05164	P05164	MPO	5.91	4.88e-06	0.706
GSPLLIGVR	Q06210;A0A6I8PRN4;A0A6I8PTT9;O94808;E5RJP4	Q06210	GFPT1;GFPT2	5.36	4.89e-06	0.706
TQPILDILLK	Q9Y376	Q9Y376	CAB39	4.42	4.9e-06	0.707
AGGPTTPLSPTR	P20700;E9PBF6;A0A0D9SFE5;A0A0D9SFY5	P20700	LMNB1	6.19	4.95e-06	0.707
LIGNSLGKPLEK	Q15042;A0A8I5KRH8;A0A8I5KT44;A0A8I5KW23;C9J1R5;A0A8I5KWG9;A0A8I5KSB6	Q15042	RAB3GAP1	3.92	4.95e-06	0.707
TEQAISFAK	P12236	P12236	SLC25A6	6.65	4.97e-06	0.708
VLNTSLK	Q16666;H3BR88	Q16666	IFI16	4.85	4.98e-06	0.708
SVETDSSTVEHVR	E7EVJ5;Q96F07;H7C229;E7EW33	E7EVJ5	CYFIP2	4.16	5e-06	0.708
LVDEYSLNAGK	P19367	P19367	HK1	5.08	5.02e-06	0.709
ETQDLIEQGALLQAHR	O60645;D6RB59	O60645	EXOC3	4.22	5.03e-06	0.709
VQSLVLGAPR	P11215	P11215	ITGAM	4.81	5.03e-06	0.709
DIQQSLADVSK	O60645;D6RB59	O60645	EXOC3	4.18	5.06e-06	0.709
LELQFPR	P48681	P48681	NES	4.96	5.1e-06	0.71
GTTLQSLGLTGGSATIR	Q9BZE9;J3QR12;J3QL04	Q9BZE9	ASPSCR1	4.45	5.15e-06	0.711
LADLLGK	Q14204;A0A2R8Y706;A0A7P0T9C4;A0A7P0TA13;A0A2R8Y5T0;A0A7P0T9R4;A0A7P0TAW9;A0A7P0T7V5;A0A7P0T916;A0A7P0T8N2;A0A7P0TBJ7;A0A7P0TAF3;A0A7P0TB75;A0A2R8Y6H2;A0A7P0T9K2;A0A7P0T9F1;A0A7P0T8W5;A0A2R8YFZ7;A0A7P0TAM4;A0A7P0T825;A0A7P0TB64;A0A7P0TAV5;A0A7P0T990;A0A804HHY6;A0A2R8YGC7;A0A7P0T942;A0A7P0T9S3;A0A7P0T934	Q14204	DYNC1H1	4.37	5.17e-06	0.711
IAQGVSGSIQDK	P20839;C9J381;A0A3B3IRL5	P20839	IMPDH1	4.18	5.21e-06	0.712
GPVGTVSEAQLAR	Q9NZM1	Q9NZM1	MYOF	5.51	5.27e-06	0.712
ASAATTAILIAR	P07093	P07093	SERPINE2	5.13	5.29e-06	0.713
MAEPDPSHPLETQAGK	Q8IXJ6;F8WBT6	Q8IXJ6	SIRT2	5.34	5.29e-06	0.713
ALEAVFGK	P38159;H3BT71;H0Y6E7;H3BR27;H3BNC1	P38159	RBMX	6.81	5.32e-06	0.713
NGTILQLAISPSR	Q5JVZ5;Q96JJ3;Q5JVZ4	Q5JVZ5	ELMO2	4.22	5.39e-06	0.714
QIDQFLVVAR	O94776;E9PCS8;E7EQY4;E7EV10;Q9BTC8;F6RRE2;E7ESY4;Q13330;H0Y4T7	O94776	MTA2;MTA3;MTA1	4.3	5.39e-06	0.714
SNTLPISLQSIR	A0A804HHY9;A0A804HJH8;A0A804HK02;C9JCA9;B8ZZ38;A0A804HIV5;A0A804HIG4;P42704;A0A804HI14;A0A804HKJ0;A0A804HL40;A0A804HK30;A0A804HIN4;A0A804HKI2;A0A804HKR3;A0A804HJZ1;A0A804HLG8;A0A804HIQ7;A0A804HI40;A0A804HJI0	A0A804HIG4	LRPPRC	5.48	5.4e-06	0.714
DLTLDQAYSYAVENAK	P23381;G3V3Y5;G3V3H8	P23381	WARS	4.14	5.4e-06	0.714
LPDAYER	P11413	P11413	G6PD	4.86	5.42e-06	0.715
MVSGMYLGELVR	P19367	P19367	HK1	4.16	5.52e-06	0.716
VVSTNYNQHAMVFFK	X6R8F3;P80188	X6R8F3	LCN2	6.05	5.54e-06	0.716
GVPIPNK	P01023;P20742	P01023	A2M;PZP	6.05	5.55e-06	0.717
GADFLVTEVENGGSLGSKK	A0A804F6T5;A0A804F729;P14618;B4DNK4	P14618	PKM	4.67	5.57e-06	0.717
LIVIEEK	A0A0A0MTR7;A0A0A0MTC1;Q63HN8	A0A0A0MTR7	RNF213	4.12	5.58e-06	0.717
SKEFMEEVIQR	P04275	P04275	VWF	4.79	5.58e-06	0.717
GQVGGQVSVEVDSAPGTDLAK	CON__P08727;P08727;K7EMS3	CON__P08727	KRT19	7.81	5.59e-06	0.717
LTADINWAVNGISK	Q9H9Y6;C9JS83	Q9H9Y6	POLR1B	4.08	5.6e-06	0.717
VIASMTVGK	Q10567;C9J1E7	Q10567	AP1B1	5.46	5.64e-06	0.718
FTFEEAAK	P13611;E9PF17;D6RGZ6;Q86W61	P13611	VCAN	4.61	5.64e-06	0.718
KGVDIEISHR	Q96RW7	Q96RW7	HMCN1	3.7	5.65e-06	0.718
QIIGPFQR	Q14683;V9GYN9	Q14683	SMC1A	4.36	5.66e-06	0.718
VVVYLQK	A0A7I2V466;A0A7I2V2Q8;P53634;A0A7I2V6E3;A0A7I2V5C5;H0YCY8;A0A7I2V2V5;A0A7I2V5L5;A0A7I2V2F3;A0A7I2V4Z3;A0A7I2V3A2;A0A7I2V5J2;A0A7I2V3M6	A0A7I2V466	CTSC	5.94	5.67e-06	0.718
TDQAFVTLTTNDAYAK	P46976;C9JQ42;G5E9W8	P46976	GYG1	5.87	5.69e-06	0.718
LENDVEQLK	E9PKC0;Q6IQ23;E9PL74;A0A1B0GTN9	E9PKC0	PLEKHA7	6.36	5.69e-06	0.718
SGDGATEQAAEYVPEK	Q12996;E9PJ06	Q12996	CSTF3	3.73	5.7e-06	0.719
AAGDVDIGDAAYYFER	P09758	P09758	TACSTD2	4.83	5.71e-06	0.719
GSSGVGLTAAVTTDQETGER	P25205;J3KQ69;A0A499FHX9	P25205	MCM3	4.44	5.76e-06	0.719
FPSPEDIPSDK	Q13568	Q13568	IRF5	3.5	5.82e-06	0.72
LKGTEDELDKYSEALK	A0A0S2Z4G6;P09493;H0YKP3;A0A087WTJ7;Q6ZN40;A0A2R2Y2Q3;A0A494C0P6;D6RGJ6;J3KN67;P06753	Q6ZN40	TPM1;TPM3	4.76	5.83e-06	0.72
GTLLALEGPGLSQR	A0A3B3ITK0;P35442;A0A7I2YQT6;A0A7I2V585;A0A7I2V344	A0A3B3ITK0	THBS2	5.72	5.9e-06	0.721
SELEEQQMHLNVGLR	Q14204;A0A2R8Y706;A0A7P0T9C4;A0A7P0TA13;A0A2R8Y5T0;A0A7P0T9R4;A0A7P0TAW9;A0A7P0T7V5;A0A7P0T916;A0A7P0T8N2;A0A7P0TBJ7;A0A7P0TAF3;A0A7P0TB75;A0A2R8Y6H2;A0A7P0T9K2;A0A7P0T9F1;A0A7P0T8W5;A0A2R8YFZ7;A0A7P0TAM4;A0A7P0T825	Q14204	DYNC1H1	5.45	5.93e-06	0.722
METLSNASGTFAIR	P50453	P50453	SERPINB9	5.14	5.93e-06	0.722
RYLENGKETLQR	Q5SPM2;A0A140T8Y4;A0A140T8W8;A0A1W2PR61;A0A1W2PPF8;A0A0G2JPD3;B0UXQ0;A0A140T941;A0A1W2PQS8;A0A140T9Z6;A0A140T912;O78179;A0A1W2PRZ0;A0A140T937;A0A140T930;A0A140T9M5;A0A140T9H5;O19617;A0A140T921;A0A140T9U8;A0A140TA05;A0A140T9L3;A0A140T9J9;Q5QT33;A0A1W2PR11;A0A140T962;A0A140T9B3;A0A140T9E1;A0A140T942;Q53Z42;A0A140T9I0;A0A140T9X5;A0A140T913;A0A140T955;A0A140T933;A0A1W2PRT9;A0A1W2PPQ2;Q5SUL5;A0A0G2JIF…	Q53Z42	HLA-A;HLA-C;HLA-B;HLA-F	4.56	5.96e-06	0.722
STFDAHIYEGR	Q05655;A0A494C1T7;C9K0E3;C9J9P1;C9JZU8	Q05655	PRKCD	3.8	6.02e-06	0.723
NYTPQLSEAEVER	P22894;H7C1M3	P22894	MMP8	4.54	6.04e-06	0.723
AIFLFVDK	P60520;H3BSM5;H3BQ50	P60520	GABARAPL2	4	6.08e-06	0.724
VSPHSGVVALTKPVPEPR	B1AHL2	B1AHL2	FBLN1	5.01	6.11e-06	0.724
TSQNSELNNMQDLVEDYKK	CON__P35908;CON__P35908v2;P35908	CON__P35908v2	KRT2	5.93	6.11e-06	0.724
QEELEAALQR	CON__P08729;CON__Q3KNV1;P08729	CON__Q3KNV1	KRT7	5.21	6.21e-06	0.725
NVISSSSFK	A0A096LP07;A0A096LPJ3;A8K070;C9JFE4;Q13098	C9JFE4	GPS1	4.17	6.28e-06	0.726
IRPTAVTLEHVPK	Q9UH99;B0QY60;B0QY64;A0A8I5QKM0	Q9UH99	SUN2	5.05	6.32e-06	0.727
MEAAAEPGNLAGVR	Q9Y5Y2;H3BNF0;H3BRK5;H3BMW1	Q9Y5Y2	NUBP2	4.4	6.36e-06	0.727
RVLDELTLAR	P02533;CON__P02533;CON__Q04695;Q04695;CON__A2A4G1;CON__P08779;P08779;CON__P08727;P08727;C9JM50;CON__P19001;CON__Q6IFX2;K7EMS3;CON__P19012;P19012;A8MT21;C9JTG5	P02533	KRT14;KRT17;KRT16;KRT19;KRT15	4.98	6.38e-06	0.727
LNPINTTLLK	Q9UGV2;Q5TH30;F8WBF9	Q9UGV2	NDRG3	4.19	6.38e-06	0.727
SPVTLLR	Q9Y5L0;C9J7E5;E9PFH4	Q9Y5L0	TNPO3	3.99	6.38e-06	0.727
EFIAPVTLK	E7ETU9;O00469	O00469	PLOD2	4.04	6.44e-06	0.728
LTDFGFAK	P49137;O43930;Q16644;C9J8E1	P49137	MAPKAPK2;PRKY;MAPKAPK3	4.19	6.5e-06	0.729
FYTDPVEAVK	P55809	P55809	OXCT1	4.14	6.54e-06	0.729
DNSNIILLGDSQGDLR	X6RM59;Q9H0P0	X6RM59	NT5C3A	4.24	6.56e-06	0.729
TEVSLTLTNKFDVPGDENAEMDAR	P46940;H0YLE8	P46940	IQGAP1	4.18	6.57e-06	0.729
VLSASQAFAAQR	Q9NUQ2	Q9NUQ2	AGPAT5	4.75	6.58e-06	0.73
MEFVSEVQR	Q9BYN8	Q9BYN8	MRPS26	4.39	6.62e-06	0.73
STLPDADR	F5GXS2;H7C144;O43707	O43707	ACTN4	4.89	6.73e-06	0.731
EYQELMSVK	CON__P08729;CON__Q3KNV1;P08729;CON__P19013;P19013	CON__Q3KNV1	KRT7;KRT4	5.87	6.74e-06	0.731
ADMEDLMSSKDDVGK	A0A8I5KZ38;P35580	A0A8I5KZ38	MYH10	5.85	6.75e-06	0.731
SYTPGVGGDPAQLAQR	O15400	O15400	STX7	5.21	6.76e-06	0.731
LKESAEFQTQLEK	P12270	P12270	TPR	4.07	6.76e-06	0.731
NGFSLGSTVK	P32456	P32456	GBP2	4.75	6.8e-06	0.732
ILSKPIEVQVGGR	A0A0C4DG89;Q7L014	A0A0C4DG89	DDX46	4.93	6.84e-06	0.732
SKELTTEIDNNIEQISSYK	A0A1B0GVI3;CON__P13645;P13645	A0A1B0GVI3	KRT10	4.97	6.84e-06	0.732
NGLSLAALKK	P16401	P16401	HIST1H1B	6.52	6.87e-06	0.733
ALAAGGYDVEKNNSR	P16401	P16401	HIST1H1B	6.4	6.92e-06	0.733
GIQAEEVLQK	Q96PP8;E7ETN8	Q96PP8	GBP5	3.73	6.95e-06	0.734
TTTTTGVLLGISSQK	A0A087WYF1;P24043;A0A087WX80;A0A8I5KQG5	A0A087WYF1	LAMA2	3.88	6.99e-06	0.734
VLDVVER	P49961	P49961	ENTPD1	4.98	7e-06	0.734
ASDLTDAFVEVK	Q86YS7	Q86YS7	C2CD5	4.18	7.05e-06	0.735
LSSLNLTNQALNK	Q86YS7;H0YFC4	Q86YS7	C2CD5	3.68	7.06e-06	0.735
AAPEGSGLGEDAR	Q96G03;E7ENQ8;E9PD70	Q96G03	PGM2	5.17	7.08e-06	0.735
LQVVPVAANQR	A0A140TA33;A0A140T902;A0A140TA41;A0A140T9C0;P22105;A0A140TA52;A0A140T8Y3;A0A140T8Z8;A0A140T9L7;A0A087X0I0;A0A3B3ISX9	A0A3B3ISX9	TNXB	6.08	7.17e-06	0.736
RGSIQVDGEELVSGR	P98160	P98160	HSPG2	3.67	7.19e-06	0.736
VPQFSFSR	P27708;F8VPD4	P27708	CAD	4.09	7.21e-06	0.736
AAEDELQLPR	P78318	P78318	IGBP1	3.91	7.25e-06	0.737
KGTVACGQPPVVENAK	P13611;E9PF17	P13611	VCAN	4.35	7.3e-06	0.737
QRNGVMPSHFSR	P39019;A0A075B6E2	P39019	RPS19	4.57	7.4e-06	0.738
GLSATVTGGQK	P60201;B1B1G3;B1B1G4;B1B1G6	P60201	PLP1	5.73	7.48e-06	0.739
QLGISATMLNASSSK	P46063;F8WA66;F8WD97	P46063	RECQL	4.48	7.49e-06	0.739
VLGAPVPAFEGR	A0A494C0G5;A0A494C1I6;O00468;A0A087X208	O00468	AGRN	5.37	7.52e-06	0.739
LGTQHPESNSAGNDVFAK	Q96NY7	Q96NY7	CLIC6	5.73	7.53e-06	0.739
QTFLLQTTK	O94776	O94776	MTA2	3.76	7.56e-06	0.74
LSPQAVNSIAK	C9J0K6;P30626	C9J0K6	SRI	5.78	7.57e-06	0.74
EVLLLAHNLPQNR	P40199;M0QYM2	P40199	CEACAM6	4.05	7.58e-06	0.74
EMVHADVELMR	O60547	O60547	GMDS	4.64	7.58e-06	0.74
GAAMVTAVASR	Q2TB90	Q2TB90	HKDC1	4.81	7.6e-06	0.74
STLFVPR	A0A494C194;V9GYL0;P12955;A0A494C165;K7ES25	P12955	PEPD	5.7	7.6e-06	0.74
IPDEINDR	Q9BUL8;C9J5C3;C9J6F3;C9J363;H7C5M9;C9JSA3;C9JND6	Q9BUL8	PDCD10	4	7.66e-06	0.741
QTLFASQVMR	A0A6Q8PHP0;P49902	A0A6Q8PHP0	NT5C2	4.16	7.71e-06	0.741
TSLMIR	P00390	P00390	GSR	4.24	7.77e-06	0.742
AVQGFFTSNNATR	O43242	O43242	PSMD3	5.78	7.84e-06	0.742
VMAGSLLLDKR	A0A0G2JR96;A0A0G2JQT1;Q7L576	Q7L576	CYFIP1	4.38	7.88e-06	0.743
MYATIYELKEDK	X6R8F3;P80188	X6R8F3	LCN2	3.88	7.9e-06	0.743
VLSGEFQIVNPHLLK	P23921;E9PL69	P23921	RRM1	3.69	7.92e-06	0.743
ADFSGMSQTDLSLSK	A0A024QZX5;A0A087X1N8;P35237;A0A2R8YD12	A0A024QZX5	SERPINB6	5.47	7.92e-06	0.743
HSNVNLTIFTAR	Q8IUX4;Q9NRW3	Q9NRW3	APOBEC3F;APOBEC3C	4.96	7.96e-06	0.743
VDLPLAVLSK	Q9H773;H3BSA6	Q9H773	DCTPP1	3.89	7.97e-06	0.743
MQGSLEAHVNGFR	Q9Y5B9	Q9Y5B9	SUPT16H	4.81	7.99e-06	0.744
VTILGHVQR	Q01813;A0A7I2V3Z0;B1APP6;V9GY25	Q01813	PFKP	4.59	8.01e-06	0.744
LVLQYAPSA	O14579;M0QXB4	O14579	COPE	3.56	8.1e-06	0.745
AIGNIELGIR	P46821;D6RA32;D6RGJ3;D6RCL2	P46821	MAP1B	4.53	8.16e-06	0.745
ALGQLISK	Q969N2;A0A1W2PNP0;A0A1W2PR73;A0A1W2PPS0;A0A1W2PPC3;A0A1W2PP57;A0A1W2PPR6;A0A1W2PPQ7;A0A1W2PRZ8;A0A1W2PR92;A0A1W2PP13;A0A1W2PRH2;A0A1W2PPI8;A0A1W2PQ29;A0A1W2PRV7;A0A1W2PNW9;A0A1W2PRG1;A0A1W2PRH8;A0A1W2PNZ5;A0A1W2PP98;A0A1W2PNS2;A0A1W2PP03;B7Z7C5;A0A1W2PR22;A0A1W2PP91	Q969N2	PIGT	4.17	8.19e-06	0.745
LPGLQATVR	Q92621	Q92621	NUP205	4.53	8.2e-06	0.745
VEGIVHPTTAEIDLKEDIGK	Q9P0M6;A0A7I2V412;Q5SQT3;A0A7I2YQD6;A0A7I2V633	Q9P0M6	H2AFY2	5.51	8.21e-06	0.745
RVAIFIEK	Q9P258	Q9P258	RCC2	4.99	8.21e-06	0.746
TTAENEFVMLK	CON__P13647;P13647;F8W0C6;H0YIN9	CON__P13647	KRT5	4.81	8.29e-06	0.746
QSGQTDPLQKEELQSGVDAANSAAQQYQR	P46940;A0A0J9YXZ5	P46940	IQGAP1	5.15	8.34e-06	0.747
ELASALK	H0YMT9;P07355;H0YMW4;H0YN42;H0YM50;H0YMU9;H0YMD0;A6NMY6;H0YNB8;H0YKS4;A0A7I2V4P4;H0YMM1;H0YKX9;H0YLV6;H0YKZ7;H0YKL9	P07355	ANXA2;ANXA2P2	6.91	8.43e-06	0.747
SGDTPITVR	Q9BWM7;S4R3N9	Q9BWM7	SFXN3	4.45	8.43e-06	0.747
TLISDIEAVK	Q8NG11;H7BXY6	Q8NG11	TSPAN14	4	8.49e-06	0.748
ASALEQFVNSVR	Q9UNS2;C9JLV5;J3QKR0;J3KTQ1;J3QL22;J3QS85	Q9UNS2	COPS3	4.46	8.5e-06	0.748
IPSTLEVDVEDVTASSR	Q5TEJ8;H7C124;X6RK39	Q5TEJ8	THEMIS2	4.36	8.52e-06	0.748
GSTGVAAAAGLHR	P54802	P54802	NAGLU	4.08	8.55e-06	0.748
VPIPVKESIEEPSAK	O75643;A0A494C1A5	O75643	SNRNP200	4.22	8.58e-06	0.749
VAIVVGAPR	P08514	P08514	ITGA2B	4.09	8.64e-06	0.749
KATGPPVSELITK	P16401	P16401	HIST1H1B	8.85	8.71e-06	0.75
VYSRALQEELQFSSK	A0A3B3IPE9;A0A087WZG4;Q6ZSZ5;A0A804CAZ4;A0A590UK10	A0A3B3IPE9	ARHGEF18	5	8.77e-06	0.75
FQTFEGDLK	P14780	P14780	MMP9	5.21	8.78e-06	0.75
AAYDVSSFSFFQR	A0A7I2V4L6;O15498;A0A7I2V3A1;A0A7I2V3V7;A0A7I2V530;A0A7I2V3S2	A0A7I2V4L6	YKT6	4.44	8.8e-06	0.75
ALSVGLVK	Q9UNM6;J3KNQ3	Q9UNM6	PSMD13	5.02	8.86e-06	0.751
AVTLDKDAYYR	Q9Y5B9;G3V5A4;G3V401;G3V2X0	Q9Y5B9	SUPT16H	4.98	8.88e-06	0.751
KALAAGGYDVEK	P16401	P16401	HIST1H1B	6.18	8.94e-06	0.751
METILEQQR	Q12874	Q12874	SF3A3	4.88	8.94e-06	0.751
FQSLNADINKR	P30740	P30740	SERPINB1	6.21	8.96e-06	0.752
AAFAPFGR	F8W8I6;P31483;E5RGV5	F8W8I6	TIA1	4.76	8.98e-06	0.752
AIAVLTSGGDAQGMNAAVR	A0A2R8Y891;P08237;F8VZI0;F8VZQ1;F8VX13;F8VP00;F8VW30;F8VSF7;F8VTQ3;F8VUB8;F8VYK8;F8VVE3	A0A2R8Y891	PFKM	4.49	8.99e-06	0.752
ASDVQDLLK	Q5R3K3	Q5R3K3	FAM26F	4.67	9.01e-06	0.752
INQEEQRPVQMMYQEATFK	P50453	P50453	SERPINB9	5.82	9.02e-06	0.752
IKELVVTQLGYDTR	Q01813;A0A7I2V3Z0;B1APP6;V9GY25	Q01813	PFKP	3.95	9.03e-06	0.752
SIQNSLLGHSSVEDAR	Q96AZ6;H0YMM4	Q96AZ6	ISG20	4.57	9.04e-06	0.752
RAPSVANVGSHCDLSLK	P21333;A0A7P0NMY4;Q60FE5	P21333	FLNA	3.99	9.07e-06	0.752
RLVEVDSSR	Q03252	Q03252	LMNB2	4.94	9.07e-06	0.752
LLIYSNNQRPSGVPDR	sp|A008027|abysis_8027;sp|A079867|abysis_79867;sp|A008455|abysis_8455;sp|A008593|abysis_8593;sp|A041345|abysis_41345;sp|A021581|abysis_21581;sp|A022515|abysis_22515;sp|A017214|abysis_17214;sp|A017168|abysis_17168;sp|A017169|abysis_17169;sp|A022434|abysis_22434;sp|A021580|abysis_21580;sp|A044636|abysis_44636;sp|A022452|abysis_22452;sp|A017219|abysis_17219;sp|A041323|abysis_41323;sp|A044637|abysis_…	sp|A008027|abysis_8027		5.96	9.09e-06	0.752
VEDVSAVEIVGGATR	Q92598;A0A0A0MSM0	Q92598	HSPH1	3.65	9.11e-06	0.753
ARPAEVGGMQLR	H0YNJ9;H0YMM5;P33316;H0YNW5;H0YKC5;H0YKI0	P33316	DUT	4.54	9.17e-06	0.753
GTGKPLEVNFAK	A0A087WYF1;P24043;A0A087WX80;A0A8I5KQG5	A0A087WYF1	LAMA2	4.02	9.28e-06	0.754
SAYQEAMDISK	P31947	P31947	SFN	4.17	9.35e-06	0.754
FGVVVVGVGR	P53004;C9J1E1	P53004	BLVRA	6.37	9.4e-06	0.755
IAENLPK	Q96KR1;H0Y8W1	Q96KR1	ZFR	3.91	9.44e-06	0.755
TELTQIK	Q5QPL9;Q5QPM0;Q9UKM9	Q9UKM9	RALY	5.79	9.45e-06	0.755
ANVIHATVTSVTLHSTEGK	Q8NBM8;E7EVZ5	Q8NBM8	PCYOX1L	3.94	9.49e-06	0.755
AAEPLLTLER	O60524;G3V5V3;G3V4D9	O60524	NEMF	3.74	9.51e-06	0.756
LLVATSVAAR	A0A0C4DG89;Q7L014	A0A0C4DG89	DDX46	5.5	9.52e-06	0.756
AAMIVNQLSK	P14923;C9JK18;C9JKY1;C9J826;C9JTX4	P14923	JUP	4.71	9.52e-06	0.756
FSGSNSGNTATLTLSR	sp|A043165|abysis_43165;sp|A019508|abysis_19508	sp|A043165|abysis_43165		6.35	9.58e-06	0.756
AGIVTSLQAR	P49736;H0Y8E6	P49736	MCM2	4.92	9.6e-06	0.756
GAGTNEDALIEILTTR	D6RA82;P12429;D6RFG5;D6RCA8	P12429	ANXA3	4.99	9.62e-06	0.756
VEETTEHLVTK	P52732;A0A7I2V3A9	P52732	KIF11	4.56	9.66e-06	0.757
LKEPPVDICLSK	Q96L50;G3V5H2	Q96L50	LRR1	8.54	9.69e-06	0.757
MSQDDFQSPPIVELR	Q5JVZ5;Q96JJ3;H0YCM7;Q5JW01	Q5JVZ5	ELMO2	3.74	9.71e-06	0.757
AELGSQEGYVPK	O75791;B1AH86	O75791	GRAP2	3.87	9.71e-06	0.757
SQDIYLR	J3QQ67;Q07020;G3V203;F8VYV2;A0A075B7A0;F8VXR6	J3QQ67	RPL18	6.62	9.72e-06	0.757
DSNELVPLSEDSMK	P19878	P19878	NCF2	4.58	9.75e-06	0.757
GQDGSPQIENIQPFSAK	H0YJH6;P42226;A0A494C0T4;A0A1W2PNW1;H0YIY2	H0YJH6	STAT6	3.99	9.75e-06	0.757
AAAGAAATHLEVAR	Q96S52	Q96S52	PIGS	4.83	9.83e-06	0.758
LITGLGVGR	Q9BQG0	Q9BQG0	MYBBP1A	3.66	9.97e-06	0.759
GPVSVGVDAR	P25774;A0A7P0TAQ0;A0A7P0T904;A0A7P0T844;A0A804DAZ0;A0A7P0T8U1;U3KQE7;A0A7P0T8H4;U3KPS4	P25774	CTSS	6.56	9.99e-06	0.759
HSLFIR	A0A3B3IRL2;O75629	A0A3B3IRL2	CREG1	5.28	1e-05	0.759
LVSYPYDMAR	Q8IUX7	Q8IUX7	AEBP1	4.55	1.01e-05	0.76
VPGEMEIER	Q8WWM9;K7EMC7	Q8WWM9	CYGB	4.6	1.01e-05	0.759
ATAQMLEVMFK	P18428	P18428	LBP	4.34	1.01e-05	0.759
VPMILVGNK	P61225	P61225	RAP2B	5.12	1.01e-05	0.76
KHVLFGTVGVPEHTYR	E9PIM6;E9PNQ8;P04216;J3QRJ3	E9PIM6	THY1	4.19	1.01e-05	0.76
KGGSYTQAASSDSAQGSDVSLTACKV	Q5SUL5;A0A0G2JIF2;Q5SRN5;P04439	Q5SRN5	HLA-A	5.13	1.02e-05	0.76
AVLVALK	P26640;A0A140T936	P26640	VARS	4.17	1.02e-05	0.76
ADALMPQETQALK	Q8WYJ6;J3KNL2	Q8WYJ6	37135	4.25	1.03e-05	0.761
LLILMEAR	P41252;A0A804HJN6;A0A804HHW9;A0A804HL54;A0A0A0MSX9;J3KR24;A0A804HJ36;A0A804HIV9;A0A804HKU1;A0A804HK69;A0A804HIG2	P41252	IARS	3.51	1.03e-05	0.761
LGYSVTAAK	Q9BWM7	Q9BWM7	SFXN3	4.36	1.03e-05	0.761
KPSPQDIAQAVLR	A0A0A0MTR7;A0A0A0MTC1;Q63HN8	A0A0A0MTR7	RNF213	3.76	1.04e-05	0.761
SEEFLIAGK	Q5H9A7;P01033	Q5H9A7	TIMP1	4.78	1.04e-05	0.761
LTQDEIISK	G3V3H3;G3V5R9;G3V2E7;E7EVH7;Q07866;F8W6L3;G5E9S8;G3V2P7	G3V3H3	KLC1	4.98	1.05e-05	0.762
LAGFELR	Q8NB16	Q8NB16	MLKL	5.25	1.05e-05	0.762
FQNPQTEGVNAVEDEIKK	A0A096LP25;E9PG46;Q2M2I8	A0A096LP25	AAK1	4.29	1.06e-05	0.762
QFHNEVLK	Q9H4G4;Q5VZR0;A0A088AWP7	Q9H4G4	GLIPR2	4.44	1.06e-05	0.763
LMGSNEGEFK	CON__P04258;P02461	P02461	COL3A1	4.65	1.07e-05	0.763
SELNLR	P06744;A0A2U3TZU2;A0A0J9YXP8;A0A2R8Y6C7;A0A0J9YYH3;A0A0J9YX90;K7ERC6;K7EPY4;K7EP41;K7ENA0;A0A0J9YXM3;A0A2R8YF08;K7ELR7;A0A0J9YXH9;K7EIL4;A0A0J9YYI8;K7ERK8	P06744	GPI	7.07	1.07e-05	0.763
ERVDFADSVTK	O00160	O00160	MYO1F	4.6	1.07e-05	0.763
AVPVGGTTVSLFGK	Q8NEB9;A8MYT4;K7EIV6;K7ENH3;K7EKH3	Q8NEB9	PIK3C3	4.51	1.07e-05	0.763
VTVFPIGIGDR	P04275	P04275	VWF	4.77	1.07e-05	0.763
NLRPMLAADAQR	H3BN02;P20702	H3BN02	ITGAX	4.43	1.09e-05	0.765
SGVGTALLLK	P02786;G3V0E5	P02786	TFRC	4.32	1.09e-05	0.765
RIDITLSSVK	Q08380;K7EP36	Q08380	LGALS3BP	4.95	1.1e-05	0.765
VVIEGQTVDFQCEAK	Q92626;H7C1W1	Q92626	PXDN	4.55	1.1e-05	0.765
DIDILNSAGK	O60264	O60264	SMARCA5	3.62	1.1e-05	0.765
ALAVNPR	Q9Y490	Q9Y490	TLN1	5.2	1.1e-05	0.765
LKVEGYSGTAGDSMAYHNGR	F5H7V9;J3QSU6;P24821;E9PC84	P24821	TNC	5.24	1.1e-05	0.765
IGQTSSSVSFK	P17301	P17301	ITGA2	4.22	1.11e-05	0.766
MEQLSSANTR	P30740	P30740	SERPINB1	7.13	1.11e-05	0.765
RNFILDQTNVSAAAQR	Q00839;A0A1W2PPS1;A0A1X7SBS1;A0A1W2PP35;Q5RI18;A0A1W2PPH7;A0A1W2PPL4;A0A1W2PQL0;A0A1W2PP34;A0A1W2PQ74;A0A1W2PRZ7;A0A1W2PQD4	Q00839	HNRNPU	4.09	1.12e-05	0.766
LQTLPVSR	Q96AA3;B5MDE0	Q96AA3	RFT1	4.04	1.12e-05	0.766
VAAALTAMDKPLGR	P19971;C9JGI3;A0A494C0L6;A0A494C1N7	P19971	TYMP	7.81	1.12e-05	0.766
GFNPAQPLNIR	Q12769;G3V198;E9PR16	Q12769	NUP160	4.18	1.13e-05	0.767
LTSLNVK	A6NLN1;K7EK45;P26599;A0A0U1RRM4;A0A7I2V621;A0A7I2V4H6;A0A6Q8PEX4;A0A087WU68;O95758	P26599	PTBP1;PTBP3	5.46	1.13e-05	0.767
VVQSMTQLVR	Q9C0C9;K7ES11	Q9C0C9	UBE2O	3.67	1.13e-05	0.767
DLKPQNLLINR	Q00535	Q00535	CDK5	3.67	1.14e-05	0.767
IISLSHLEMTWTNR	B1AQ74;Q6NSI4	B1AQ74	CXorf57	10.7	1.14e-05	0.767
SYLAQFAAR	P78344;D3DQV9;H0YE22;H0Y3P2;E9PKF8	P78344	EIF4G2	4.33	1.14e-05	0.767
LAENNIQPIFAVTSR	A0A494C0X7;P05107;D3DSM0;J3KNI6	A0A494C0X7	ITGB2	3.67	1.14e-05	0.767
GPVPAKPTVLFEK	Q66K74	Q66K74	MAP1S	5.59	1.14e-05	0.767
VSEGGPAEIAGLQIGDK	O14907	O14907	TAX1BP3	4.73	1.14e-05	0.767
YQKSTELLIR	K7EK07;P84243;K7EMV3;A0A590UJJ6;B4DEB1;K7ES00;Q6NXT2;K7EP01;P68431;Q16695;Q5TEC6;Q71DI3	K7EK07	H3F3B;H3F3A;H3F3C;HIST1H3A;HIST3H3;HIST2H3PS2;HIST2H3A	3.97	1.15e-05	0.768
DNPDLGTAFVK	A0A0A0MRE5;Q9ULH1	A0A0A0MRE5	ASAP1	3.97	1.16e-05	0.769
EESEQIVLIGSK	P43405	P43405	SYK	4.19	1.16e-05	0.769
DYLPLVLGPTAMR	P05164	P05164	MPO	5.73	1.17e-05	0.769
ESAVGVAALAK	E7EQW0;B7ZLE8;A0A0G2JS53;Q13075;A0A0G2JNC7;A0A0G2JQE0	E7EQW0	NAIP	3.98	1.17e-05	0.769
AGAATQASLESAPR	Q9BXR0	Q9BXR0	QTRT1	4.37	1.17e-05	0.769
RLNINAAK	P00813;F5GWI4	P00813	ADA	3.91	1.18e-05	0.77
GIPTLVYR	A0A0A0MTR7;A0A0A0MTC1;Q63HN8	A0A0A0MTR7	RNF213	3.97	1.18e-05	0.77
FTGVITQGR	Q8IUX7;H7C0W8;Q8N436	Q8IUX7	AEBP1;CPXM2	5.86	1.19e-05	0.77
ITVDPTTDGPTK	D6RGG3;Q99715	D6RGG3	COL12A1	4.49	1.19e-05	0.77
KQEVDLQQLIR	O60443;C9JSR4	O60443	DFNA5	4.22	1.19e-05	0.77
YGGQPVPNFPSK	P21333;Q60FE5	P21333	FLNA	6.31	1.19e-05	0.77
VPTGGVEEGLLER	sp|A081248|abysis_81248;A0A0A0MS09;sp|A024289|abysis_24289;sp|A024296|abysis_24296;sp|A024292|abysis_24292;sp|A024294|abysis_24294;sp|A024291|abysis_24291	sp|A081248|abysis_81248	IGHD	4.2	1.19e-05	0.77
SYIPGQPVTAVVQR	O14907;A0A087X282	O14907	TAX1BP3	4.94	1.19e-05	0.77
ALAQLSLSR	Q6XQN6;G5E977;A0A087WUT5	Q6XQN6	NAPRT	6.25	1.2e-05	0.77
DVLVGADSVR	O43760;K7EJ35	O43760	SYNGR2	4.75	1.2e-05	0.771
STITSREIQTAVR	P62807;O60814;U3KQK0;Q99879;Q99877;P57053;P23527;P58876;Q93079;Q5QNW6;Q99880	Q93079	HIST1H2BC;HIST1H2BK;HIST1H2BN;HIST1H2BM;H2BFS;HIST1H2BO;HIST1H2BD;HIST1H2BH;HIST2H2BF;HIST1H2BL	4.62	1.21e-05	0.771
LNSLAIGLR	P54886	P54886	ALDH18A1	4.95	1.22e-05	0.772
FAQVIR	P12111	P12111	COL6A3	8.59	1.22e-05	0.772
TEIDKPSQMQVTDVQDNSISVK	H0Y7Z1;P02751	P02751	FN1	4.63	1.22e-05	0.772
APGAEEYAQQDVLKK	P09543	P09543	CNP	5.08	1.23e-05	0.772
SKESMTDAILQTDQTLTEK	P32455	P32455	GBP1	6.81	1.23e-05	0.772
AIFQTIQNR	O95373	O95373	IPO7	5.14	1.23e-05	0.772
VYFDLR	A0A7P0Z497;P23284;A0A7P0TB45;A0A7P0T7U3	A0A7P0Z497	PPIB	8.23	1.23e-05	0.772
EGALTAFR	Q15008;C9J0E9	Q15008	PSMD6	4.52	1.23e-05	0.772
LNEFLELER	Q5M775;A0A7I2V486;A0A7I2V416;A0A7P0TBP2;A0A7I2YQJ3;A0A7I2V451;A0A7P0Z4I1;J3QS22;A0A7I2V562;A0A7P0TAS3;A0A7P0TB87;A0A7P0T9K0	Q5M775	SPECC1	5.95	1.23e-05	0.772
ALIDQEVKNGIPSNR	O75608;B4DP64;A0A087X1K9;E5RGR0;E5RJ48;E5RI35	O75608	LYPLA1	3.84	1.24e-05	0.772
RLQLLEEENKER	A0A0A0MS29;H7C433;E9PPW6;Q9GZY8	Q9GZY8	MFF	4.07	1.24e-05	0.773
SYPGLTSYLVR	X6R8F3;P80188	X6R8F3	LCN2	5.99	1.25e-05	0.773
GILAADESTGSIAK	H3BPS8;H3BQN4;H3BUH7;P04075;J3KPS3	P04075	ALDOA	3.72	1.26e-05	0.774
LLLLDTVTMQVTAR	Q9Y678;H0Y8X7	Q9Y678	COPG1	4.04	1.26e-05	0.774
QVFAVQR	P08246	P08246	ELANE	6.58	1.26e-05	0.774
QLAEEYLYR	P14780	P14780	MMP9	4.32	1.26e-05	0.774
LPLAVVGSNTIIEVNGKR	Q16181;E7ES33;E7EPK1;G3V1Q4	Q16181	39326	5.53	1.27e-05	0.774
ALDLLDR	P27361;E9PQW4;E9PBK7;B3KR49;H0YEX6;E9PRH7	P27361	MAPK3	4.82	1.27e-05	0.774
EVALDLSQHK	O00391	O00391	QSOX1	4.3	1.27e-05	0.774
LDYLSSLK	F5GZS6;A0A7P0Z4A0;A0A7P0TAN7;J3KPF3;A0A7P0Z4P5;P08195;A0A7P0T9F7;F5GZI0;F5H056;A0A7P0TAT7;A0A7P0TBF8	F5GZS6	SLC3A2	4.42	1.27e-05	0.774
TILISAHGNSSR	P07738	P07738	BPGM	5.57	1.28e-05	0.775
ASLSLAPVNIFK	P78371;F5GWF6;F8VQ14	P78371	CCT2	6.07	1.28e-05	0.775
EDKESNPATINAATELDTPK	F5H7V9;J3QSU6;P24821;E9PC84	P24821	TNC	5.46	1.28e-05	0.775
VSLQLLR	O15230	O15230	LAMA5	4.64	1.29e-05	0.775
SIPPEGLAQSELMR	Q9Y285;K7ER00;K7ER16;K7EK06	Q9Y285	FARSA	4.35	1.31e-05	0.776
VTVLGQPK	sp|A008758|abysis_8758;sp|A035745|abysis_35745;B9A064;sp|A043259|abysis_43259;A0A0B4J231;sp|A085581|abysis_85581;sp|A035792|abysis_35792;sp|A035796|abysis_35796;sp|A035778|abysis_35778;sp|A009616|abysis_9616;sp|A009601|abysis_9601;sp|A009594|abysis_9594;sp|A009648|abysis_9648;sp|A043215|abysis_43215;sp|A009656|abysis_9656;sp|A009599|abysis_9599;sp|A009662|abysis_9662;sp|A035767|abysis_35767;sp|A0…	sp|A043185|abysis_43185	IGLL5	7.77	1.31e-05	0.776
FSVHQQSEMDTSVK	P06756	P06756	ITGAV	5.4	1.31e-05	0.776
NHKEEMSQLTGQNSGDVNVEINVAPGK	P35527;CON__P35527;K7EQQ3	P35527	KRT9	5.18	1.31e-05	0.776
IQALNGPLR	F5H7V9;J3QSU6;H0YGZ3;P24821;E9PC84	P24821	TNC	4.94	1.31e-05	0.776
NSDVEIFAVGVK	D6RGG3;Q99715	D6RGG3	COL12A1	4.52	1.32e-05	0.776
VEAEGQLQQLR	Q5TZA2	Q5TZA2	CROCC	3.93	1.32e-05	0.776
AIAAAHTFLLK	O75718;C9JP16	O75718	CRTAP	4.48	1.32e-05	0.776
GGLYIVTEYMAK	P41240	P41240	CSK	4.12	1.32e-05	0.777
GELTGEVR	Q14315	Q14315	FLNC	5.36	1.32e-05	0.776
SYVDTGGVSR	O95466	O95466	FMNL1	3.54	1.32e-05	0.776
LGTVPQFPR	P98160	P98160	HSPG2	7.13	1.32e-05	0.776
AGFGNLR	Q14314	Q14314	FGL2	5.93	1.33e-05	0.777
ELNDIASKPSQEHIFK	H3BN02;P20702	H3BN02	ITGAX	3.93	1.34e-05	0.777
GVEGDFLIR	O43639	O43639	NCK2	3.71	1.34e-05	0.777
RVLTDELK	Q15582	Q15582	TGFBI	5.97	1.34e-05	0.777
TLINELVK	Q14204;A0A2R8Y706;A0A7P0T9C4;A0A7P0TA13;A0A2R8Y5T0;A0A7P0T9R4;A0A7P0TAW9	Q14204	DYNC1H1	5.66	1.35e-05	0.778
IYVSQYPF	G3V4U0;Q9UBX5;G3XA98	G3V4U0	FBLN5	4.87	1.35e-05	0.778
KAQEGGGSEVFQELK	Q8NCA5;A0A8I5KR56;A0A8I5QKV5;A0A8I5KZA5;E9PH82	Q8NCA5	FAM98A	3.37	1.36e-05	0.778
KVISSLQEDR	P12314;A0A0A0MRM3;Q92637;A0A087WXZ6	P12314	FCGR1A;FCGR1B	3.71	1.36e-05	0.778
ALADDDFLTVTGK	A0A3B3IU45;P33991;A0A3B3IT92;A0A3B3IS57;E5RG31;A0A3B3ITP6	A0A3B3IU45	MCM4	4.84	1.36e-05	0.778
AMVEYEIDLQK	P09874	P09874	PARP1	4.41	1.36e-05	0.778
VVEGTPLIDGR	Q14739;A0A494C1L1	Q14739	LBR	4.58	1.37e-05	0.779
ASSEGGTAAGAGLDSLHK	A0A1W2PNV4;O15143;C9JEY1;C9K057	A0A1W2PNV4	ARPC1B	3.7	1.38e-05	0.779
EFAVTMRPTEASER	E5RJ11;O60496	O60496	DOK2	4.22	1.38e-05	0.779
LEVSVDSDQKK	P06756	P06756	ITGAV	6.03	1.38e-05	0.779
DSAGDSDVVVQELK	Q9NUB1	Q9NUB1	ACSS1	3.38	1.39e-05	0.779
VIEAVSEELSR	Q96KP1	Q96KP1	EXOC2	3.94	1.39e-05	0.78
VDIRPQLLK	Q5SSJ5;B0QZK4;Q5SWC8	Q5SSJ5	HP1BP3	5.95	1.39e-05	0.78
ALIVLNNLSVNAENQR	Q9UH62	Q9UH62	ARMCX3	3.82	1.4e-05	0.78
NGKPVTTGVSETVFLPR	A0A0G2JMH6;P01903;Q30118;A0A0G2JH46	A0A0G2JMH6	HLA-DRA	6.44	1.4e-05	0.78
IIQFKPGQDR	Q8TDQ7	Q8TDQ7	GNPDA2	3.73	1.43e-05	0.782
RGDLPFVVPR	P35579;A0A8I5KWT8	P35579	MYH9	6.47	1.43e-05	0.781
DSAQNSVIIVDK	P02786;G3V0E5	P02786	TFRC	3.9	1.43e-05	0.781
AAADSDPNLDPLMNPHIR	O95159	O95159	ZFPL1	4.48	1.43e-05	0.781
IVLAAQAISR	Q9UI10;E7ERK9	Q9UI10	EIF2B4	3.62	1.44e-05	0.782
VTAQGPGLEPSGNIANK	P21333;A0A7P0NMY4;A0A087WWY3;A0A7I2V3E6;Q60FE5;F8WE98	P21333	FLNA	3.79	1.44e-05	0.782
EASSVSDFNQNFEVPNR	P41218	P41218	MNDA	6.35	1.44e-05	0.782
YLGSVDYR	Q86VP3;F8VW41;A0A8I5KQA5	Q86VP3	PACS2	6.07	1.44e-05	0.782
TVLEIDTPK	P20908	P20908	COL5A1	4.33	1.45e-05	0.782
VFIDQINR	Q8NBL1;F8WEW4;B4DVA9;H7C5H0	Q8NBL1	POGLUT1	3.56	1.45e-05	0.782
TRLEQEIATYR	P02533;CON__P02533;CON__Q04695;Q04695;A0A3B3IS58;CON__A2A4G1;CON__P08779;P08779;CON__Q9Z2K1;CON__Q3ZAW8;K7ERE3;CON__ENSEMBL:ENSP00000377550;P13646;CON__P08730-1;CON__P13646-1;CON__Q6IFX2;CON__P19012;P19012;A8MT21;CON__Q61782	P02533	KRT14;KRT17;KRT16;KRT13;KRT15	5.33	1.46e-05	0.783
GLQKEEVVLLTHGDSVDK	P49915	P49915	GMPS	4.33	1.47e-05	0.783
GVSSLSIQFAK	Q5VZK9	Q5VZK9	LRRC16A	3.32	1.47e-05	0.783
YQPMEPNPR	P05164;J3QSF7	P05164	MPO	6.51	1.47e-05	0.783
DLLELTR	Q15080;A0A0G2JR51;A0A494BZS1	Q15080	NCF4	4.4	1.47e-05	0.783
LFPQLEGK	Q6NUM9;H7C3J0	Q6NUM9	RETSAT	4.45	1.47e-05	0.783
SNTVVIMNMQGQIVR	Q2TAY7	Q2TAY7	SMU1	4.79	1.47e-05	0.783
AIFSVGPVSPSR	A8MVE2;A0A0G2JQ46;A0A0B4J1W1;A0A0G2JQ44;A0A087WSX8;A0A0G2JNM2;A0A0G2JQ15;Q8NHL6;A0A0G2JMY9;Q8N6C8;A0A0G2JM99	A8MVE2	LILRB1;LILRA3	4.34	1.48e-05	0.783
LAAQSCALSLVR	Q08211	Q08211	DHX9	4.38	1.49e-05	0.784
GTGLTAVAVQEGNSDVVEVR	Q9UGT4	Q9UGT4	SUSD2	5.72	1.49e-05	0.784
DCVGDVTENQICNK	P07996	P07996	THBS1	4.17	1.49e-05	0.784
SPDFYEEVK	Q8NF50;A2A369	Q8NF50	DOCK8	3.48	1.5e-05	0.784
GAAMVTAVAYR	P19367;E9PB90;P52789	P19367	HK1;HK2	4.66	1.5e-05	0.784
VNQPASFAVSLNGAK	P21333;A0A7P0NMY4;Q60FE5	P21333	FLNA	5.22	1.51e-05	0.785
LISEMHSFIQIK	Q16666	Q16666	IFI16	5.15	1.52e-05	0.785
SQYEVMAEQNR	CON__P08727;P08727;K7EMS3	CON__P08727	KRT19	4.76	1.52e-05	0.785
LDQDKIEALSSK	Q12933	Q12933	TRAF2	3.58	1.52e-05	0.785
HVTFNQVK	P23381;G3V3Y5;G3V3H8;H0YJP3	P23381	WARS	7.82	1.52e-05	0.785
LVTGGGEEVDVHSLGAR	Q6DKJ4;A0A0G2JQK5	Q6DKJ4	NXN	4.1	1.53e-05	0.785
SSLGASFVQIK	Q9NYL2;C9J3F7	Q9NYL2	ZAK	3.33	1.53e-05	0.785
NTLSLQMNSLR	sp|A081249|abysis_81249;sp|A012562|abysis_12562;sp|A027427|abysis_27427;sp|A027026|abysis_27026;sp|A028176|abysis_28176;sp|A026572|abysis_26572;sp|A027909|abysis_27909;sp|A027595|abysis_27595;sp|A029914|abysis_29914;sp|A005627|abysis_5627;sp|A065957|abysis_65957;sp|A087440|abysis_87440;sp|A086302|abysis_86302;sp|A059972|abysis_59972;sp|A059118|abysis_59118;sp|A052157|abysis_52157;sp|A029626|abysi…	sp|A081249|abysis_81249		3.85	1.54e-05	0.785
TSLLASGAPR	P20701	P20701	ITGAL	4.65	1.54e-05	0.786
ELNMIIMLPDETTDLR	A0A024QZX5;A0A087X1N8;P35237;A0A2R8YD12	A0A024QZX5	SERPINB6	5.72	1.54e-05	0.786
FRNPPGGDNLEER	Q9NV96;A0A669KBE6;A0A669KBF5	Q9NV96	TMEM30A	4.2	1.54e-05	0.786
SLQQAQQQLEEVR	Q9H4E7	Q9H4E7	DEF6	3.18	1.55e-05	0.786
SKLPGIVAEGR	P01008	P01008	SERPINC1	6.11	1.55e-05	0.786
LSGMPDLSLSFMNPR	Q9Y2T2	Q9Y2T2	AP3M1	3.89	1.56e-05	0.786
APVDITGQFEK	B4DKY1;P49589	P49589	CARS	5.4	1.56e-05	0.786
ALDGPEQMELEEGK	P62195;J3QQM1;J3QSE0;J3KTQ9	P62195	PSMC5	4	1.56e-05	0.786
MSSTFIGNSTAIQELFK	A0A0B4J269;Q13509	A0A0B4J269	TUBB3	4.29	1.57e-05	0.787
QAFLSGR	P51648;A0A5F9ZHN9;A0A5F9ZHI5;J3QRD1;A0A5K1VW72;A0A5F9ZHZ9;I3L0X1;J3KTG1;J3QKK9	P51648	ALDH3A2	4.46	1.58e-05	0.787
VTPLGAGQDVGR	Q5TA45;C9J979	Q5TA45	CPSF3L	3.55	1.58e-05	0.787
IGYSSPLTLSDQSSK	O60488;A0A804HI36	O60488	ACSL4	4.74	1.59e-05	0.787
FMPLSDVLYGR	A6NC48;Q10588;H0Y984	A6NC48	BST1	3.93	1.59e-05	0.788
LQQEFEDKLEVEQQNKR	Q92614	Q92614	MYO18A	4.44	1.59e-05	0.788
SNLGSVVLQLK	O43143	O43143	DHX15	4.46	1.6e-05	0.788
DVDNAYMIK	CON__P35908;CON__P35908v2;P35908	CON__P35908v2	KRT2	5.29	1.6e-05	0.788
KAPAEGVLTLR	Q9H6S3;A0A3B3ISQ4	Q9H6S3	EPS8L2	4.41	1.61e-05	0.788
VSLQQHLTVR	Q8N8U9;A0A3B3ITY4;A0A3B3IRM9;A0A3B3IUC5;A0A3B3ITZ8;A0A3B3ISL7	Q8N8U9	BMPER	3.63	1.62e-05	0.789
LEQLAR	A0A087WUZ3;F8W6C1;Q01082;P11277	Q01082	SPTBN1;SPTB	5.05	1.62e-05	0.789
LEMNYVVGGVVSHR	P23142;CON__ENSEMBL:ENSBTAP00000016046	P23142	FBLN1	5.83	1.63e-05	0.789
AELQQLR	Q96C01;E7EQY1;C9J2Y4	Q96C01	FAM136A	4.74	1.64e-05	0.789
DIQMTQSPSTLSASVGDR	sp|A009053|abysis_9053;sp|A044003|abysis_44003;sp|A069986|abysis_69986;sp|A036774|abysis_36774;sp|A007395|abysis_7395;sp|A006893|abysis_6893;sp|A007393|abysis_7393;sp|A069094|abysis_69094;sp|A065521|abysis_65521;sp|A082926|abysis_82926;sp|A031518|abysis_31518;sp|A031502|abysis_31502;sp|A085001|abysis_85001;sp|A084422|abysis_84422;sp|A083510|abysis_83510;sp|A057626|abysis_57626;sp|A069166|abysis_6…	sp|A009053|abysis_9053		4.94	1.65e-05	0.79
NDSVVAGGGAIEMELSK	Q99832	Q99832	CCT7	4.65	1.65e-05	0.79
ELTSELKENFIR	X6R8F3;P80188	X6R8F3	LCN2	5.49	1.67e-05	0.79
ANGTTVHVGIHPSK	P61254;J3QRI7;J3QQQ9;J3QQV1;J3QRC4;J3KS10;Q9UNX3;E5RIT6	P61254	RPL26;RPL26L1	4.26	1.67e-05	0.79
ADVLFIAPR	Q92542	Q92542	NCSTN	4.14	1.68e-05	0.791
AGHNVIALVGGATAR	Q9Y2Z4;H0YHS6	Q9Y2Z4	YARS2	4.01	1.68e-05	0.791
NSHIAIAFDDTK	A0A087WYF1;P24043;A0A087WX80;A0A8I5KQG5	A0A087WYF1	LAMA2	3.9	1.69e-05	0.791
SVKEDSNLTLQEK	P46940;H0YLE8	P46940	IQGAP1	6	1.7e-05	0.791
ASSNPAYIGSGTK	0	REV__O95497		5.82	1.71e-05	0.792
AQHPNIVTVR	A0A0D9SER5;A0A0D9SEI3;A0A0D9SEN2;P21127;Q9UQ88;Q5QPR3;Q5QPR4	Q9UQ88	CDK11B;CDK11A	4.16	1.72e-05	0.792
NFVINVVNR	P12110;H7C0M5	P12110	COL6A2	5.79	1.73e-05	0.792
EPALNEANLSNLK	Q06323	Q06323	PSME1	3.93	1.73e-05	0.792
VCNSPEPQYGGK	A0A3B3ITK0;P35442;A0A7I2YQT6;A0A7I2YQ86	A0A3B3ITK0	THBS2	4.24	1.73e-05	0.792
LSLGLSR	Q9NR12;D6RH06;D6RF83;H7BYK4;D6RAN1;H0Y8W6	Q9NR12	PDLIM7	5.06	1.74e-05	0.793
FRHENVIGIR	P27361;E9PQW4;E9PBK7;E9PJF0	P27361	MAPK3	3.94	1.76e-05	0.793
FTTDLDSPR	F5H7V9;J3QSU6;H0YGZ3;P24821;E9PC84	P24821	TNC	6.08	1.76e-05	0.793
NPPIDDLIK	H7C4F6;O00629;A0A7I2YQ95;A0A7I2V340;A0A7I2V333;O00505	H7C4F6	KPNA4;KPNA3	4.33	1.77e-05	0.793
DTAYPETNDAIPMISK	Q9UQE7	Q9UQE7	SMC3	4.73	1.77e-05	0.793
LEQGENVFLQATDK	A0A0A0MSV6;D6R934;P02746	A0A0A0MSV6	C1QB	5.62	1.78e-05	0.794
AQLLELPYAR	P50453	P50453	SERPINB9	5.38	1.79e-05	0.794
AHVEGDGVVEGIIR	A0A8I5KRS9;A6NHR9	A0A8I5KRS9	SMCHD1	4.3	1.79e-05	0.794
SKVEDPAVIMR	P42331;H7C4P1;C9JB56	P42331	ARHGAP25	4.27	1.82e-05	0.795
ASVSSATFSGHGAR	Q7Z4H3;V9GYS5;V9GZ04	Q7Z4H3	HDDC2	4.41	1.82e-05	0.795
QVAIVFR	Q2TAM5;A0A087X0W8;Q04206;E9PKH5	Q2TAM5	RELA	3.77	1.83e-05	0.795
VLIPIHEANR	Q96N67;A0A1B0GWE0;A0A0U1RR97	Q96N67	DOCK7	3.3	1.84e-05	0.796
STSTAYMELSSLR	sp|A008877|abysis_8877;sp|A008704|abysis_8704;sp|A033114|abysis_33114;sp|A008703|abysis_8703;sp|A040983|abysis_40983;sp|A052819|abysis_52819;sp|A076195|abysis_76195;sp|A076932|abysis_76932;sp|A076022|abysis_76022;sp|A003531|abysis_3531;sp|A075478|abysis_75478;sp|A075158|abysis_75158;sp|A008960|abysis_8960;sp|A075832|abysis_75832;sp|A050437|abysis_50437;sp|A045526|abysis_45526;sp|A016101|abysis_16…	sp|A008877|abysis_8877		5.22	1.85e-05	0.796
GFPLPTPAR	A0A2R8YDF1;P17213;H0Y738	A0A2R8YDF1	BPI	5.94	1.85e-05	0.796
ILNLSGNELK	Q9UBU9;E9PIN3;B4E227	Q9UBU9	NXF1	3.55	1.87e-05	0.797
MEMEKEFEQIDK	P18031	P18031	PTPN1	4.35	1.89e-05	0.797
MDPNTIIEALR	O95373;E9PLJ0	O95373	IPO7	4.42	1.91e-05	0.798
EGILGQHQFLEGPEGIENTR	P17301;E7ESP4;E7EMF1;E9PB77	P17301	ITGA2	5.27	1.91e-05	0.798
VASLPGDFK	Q7Z5J4;A8MXE8	Q7Z5J4	RAI1	4.13	1.91e-05	0.798
YLAEVATGDDK	P31947	P31947	SFN	3.79	1.91e-05	0.798
IQTELQETVK	E9PG19;O94868;C9JM66	E9PG19	FCHSD2	3.55	1.92e-05	0.798
AILNGIDSINK	Q9UQE7	Q9UQE7	SMC3	4.92	1.92e-05	0.798
GSNPHLQTFTFTR	Q9BSJ8;F8VZB1	Q9BSJ8	ESYT1	4.96	1.93e-05	0.798
SDTSGDYEITLLK	D6RA82;P12429	P12429	ANXA3	4.7	1.94e-05	0.799
TTQFSCTLGEKFEETTADGR	Q01469;I6L8B7	Q01469	FABP5	4.48	1.94e-05	0.799
EAIEAIAESAFK	Q00722	Q00722	PLCB2	4.8	1.94e-05	0.799
KEITGIGPSTTTETETIAK	O75436;S4R3Q6	O75436	VPS26A	3.72	1.94e-05	0.799
GFAFVTFDDHDSVDK	P09651;A0A7I2V3R8;F8W6I7;A0A7I2V3W0;A0A7I2V2L6;A0A7I2YQX9;F8VZ49;A0A2R8Y4L2;F8VTQ5;H0YH80;A0A7I2V5U9;Q32P51	P09651	HNRNPA1;HNRNPA1L2	4	1.96e-05	0.799
QEQLLLK	P42224;A0A669KB68;A0A669KB56;A0A669KBA4;A0A669KB53;A0A669KBI6;J3KPM9;A0A669KB52;A0A669KB75;E7EPD2;A0A669KB17	P42224	STAT1	5.96	1.96e-05	0.799
LLQSLLDTR	Q13045	Q13045	FLII	4.91	1.97e-05	0.799
DKVVALAEGR	Q8N6T3;F8W1U7;F8VWH9;E5RHT6;E5RHC5;F8VWB3	Q8N6T3	ARFGAP1	3.58	1.98e-05	0.8
AFLEEAQVMK	P09769;Q5TGY6	P09769	FGR	4.09	1.98e-05	0.8
GQPSNKEDVDDLVSQLR	P12270	P12270	TPR	3.7	1.98e-05	0.8
NVIMFLGDGMGVSTVTAAR	P05186	P05186	ALPL	4.47	1.99e-05	0.8
EGILSPSELR	Q9NZN5;E9PMR6	Q9NZN5	ARHGEF12	3.41	2e-05	0.8
KVAPAPAVVK	P62424;Q5T8U3	P62424	RPL7A	5.68	2e-05	0.8
EAACLQQTQIEEAR	A0A494C0G5;A0A494C1I6;O00468;A0A087X208	O00468	AGRN	5.05	2.01e-05	0.8
SLSQQIENIR	P02452	P02452	COL1A1	4.75	2.01e-05	0.801
LQAEIDNIK	CON__P08729;CON__Q3KNV1;P08729	CON__Q3KNV1	KRT7	6.32	2.01e-05	0.801
LEAAIAEAEERGELALK	CON__P08729;CON__Q3KNV1;P08729	CON__Q3KNV1	KRT7	5.95	2.01e-05	0.801
SIGTANRPMGAGEALR	Q12906;K7EQR9	Q12906	ILF3	5.11	2.02e-05	0.801
AMMYSGELK	A0A7I2V2T3;P12268;H0Y4R1;E7ETK5;A0A7I2YQK5	A0A7I2V2T3	IMPDH2	4.1	2.02e-05	0.801
GMAVTISVK	Q14116	Q14116	IL18	4.57	2.03e-05	0.801
LDGLQQR	Q96TA1	Q96TA1	FAM129B	4.33	2.04e-05	0.801
DGFFGNPR	sp|A008822|abysis_8822;P01871;sp|A057527|abysis_57527;sp|A034261|abysis_34261;sp|A081288|abysis_81288;sp|A081302|abysis_81302	sp|A034261|abysis_34261	IGHM	5.55	2.04e-05	0.801
LVAQFPSSGR	Q12996;E9PLP8	Q12996	CSTF3	3.97	2.06e-05	0.802
GAGTGGLGLAVEGPSEAK	P21333;Q60FE5	P21333	FLNA	4.37	2.06e-05	0.802
LGIFGDTEDVAGK	Q93084	Q93084	ATP2A3	3.46	2.07e-05	0.802
GVLFASGQNLAR	H0Y9Q1;P28838	P28838	LAP3	5	2.07e-05	0.802
EVNEVSQNFQTTK	Q9BZQ8	Q9BZQ8	FAM129A	3.75	2.08e-05	0.802
IGELFSK	P78527;F5GX40	P78527	PRKDC	3.91	2.08e-05	0.802
GNTAAQMAQILSFNK	A0A024QZX5;A0A087X1N8;P35237;A0A2R8YDD0;A0A2R8Y517	A0A024QZX5	SERPINB6	5.2	2.08e-05	0.802
FKLEESYDMESVLR	A0A024QZX5;A0A087X1N8;P35237;A0A2R8YD12	A0A024QZX5	SERPINB6	5	2.08e-05	0.802
VSGNLAVVQK	R4GN15;Q9BRR9;H0YI36;H0YI33	R4GN15	ARHGAP9	3.41	2.09e-05	0.803
AMSIPQIR	Q12882	Q12882	DPYD	4.08	2.09e-05	0.803
DMTAQFNNLGVLHVTK	Q00653	Q00653	NFKB2	4.44	2.09e-05	0.803
KATDAEADVASLNR	A0A0S2Z4G6;P09493;H0YKP3;A7XZE4;CON__Q3SX28;Q5TCU3;Q6ZN40	Q6ZN40	TPM1;TPM2b;TPM2	6.87	2.09e-05	0.802
GKFNTSDVSAIEK	P19367	P19367	HK1	4.39	2.1e-05	0.803
LTAQVEELSK	H0YFY6;K4DIE0	H0YFY6	NUMA1	3.97	2.11e-05	0.803
TNQVNSGGVLLR	P02747	P02747	C1QC	5.83	2.12e-05	0.803
VLDFHNLPDGITK	P20908	P20908	COL5A1	4.28	2.15e-05	0.804
MLAIYDGFDGFAK	Q01813;A0A7I2V3Z0;B1APP6;H0Y3Y3	Q01813	PFKP	4.41	2.15e-05	0.804
AAIQSQLDGVR	O60645;D6RB59;D6RBR9	O60645	EXOC3	4.98	2.16e-05	0.804
QNEELNLLK	Q86UP2	Q86UP2	KTN1	3.69	2.16e-05	0.804
SSCISQHVISEAK	A0A0C4DH07;Q8N2S1	A0A0C4DH07	LTBP4	3.76	2.16e-05	0.804
EMTVTYIEASGK	P13686	P13686	ACP5	4.27	2.19e-05	0.805
KEFSIDVGYER	P61158;B4DXW1	P61158	ACTR3	4.44	2.19e-05	0.805
VLGSVSLK	P56589;Q7Z6V3	P56589	PEX3	3.26	2.19e-05	0.805
SITLFVQEDR	P07996;CON__Q28194	P07996	THBS1	4.62	2.2e-05	0.805
AAATGAVAASAASGQAEGK	Q9NWH9;H7BXE3;H0YL55;H0YLE6;H0YNF3;H0YMR6;H0YMW8;H0YLW7	Q9NWH9	SLTM	4.64	2.21e-05	0.806
DTSAFFLETK	E5RJ11;G3V114;O60496	O60496	DOK2	4.36	2.22e-05	0.806
TMLESLIADK	E7EVJ5;Q96F07;H7C229;E7EW33;A0A087WZL7;A0A0G2JR96;A0A0G2JQT1;Q7L576	Q7L576	CYFIP2;CYFIP1	4.56	2.23e-05	0.806
ATLEVILRPK	Q9NQT4;M0R102	Q9NQT4	EXOSC5	4.06	2.23e-05	0.806
KGIQAEEVLQK	Q96PP8;E7ETN8	Q96PP8	GBP5	5.32	2.23e-05	0.806
APSIALGFR	Q14728;D6RE79;D6RIZ4;D6RA47	Q14728	MFSD10	3.99	2.23e-05	0.806
QSIGQFHEGDAYVVK	O95425;A0A6I8PIX7;A0A0J9YWY6;A0A6I8PL75	O95425	SVIL	3.29	2.24e-05	0.806
ALLNQLR	Q96CW5;A0A0J9YX63;A0A0J9YX56	Q96CW5	TUBGCP3	3.17	2.26e-05	0.807
VPLQNPPIK	Q8NF50;A2A369	Q8NF50	DOCK8	4.17	2.28e-05	0.807
SEHPGLSIGDTAK	P26583;D6R9A6	P26583	HMGB2	3.7	2.3e-05	0.807
VPDLSGMLQVLK	Q8IYM9;C9JWC5;H7C376;H7C262;H7C2K0	Q8IYM9	TRIM22	3.94	2.3e-05	0.808
VESLPGAHGTDFPDPK	Q9NRD1;J3KQ72	Q9NRD1	FBXO6	3.42	2.31e-05	0.808
MGLIQTADQLR	P18031;B4DSN5	P18031	PTPN1	4.07	2.31e-05	0.808
SLSDLFR	O75410;E7EVI4;E7ET87;H0YAY0;H0YBT8;B4E3H6	O75410	TACC1	3.48	2.31e-05	0.808
CVDVNECETGVHR	P98095	P98095	FBLN2	4.69	2.32e-05	0.808
AGLNSLEAVKR	A0A2R8Y5V9;A0A2R8YGX3;A0A590UJB9;A0A590UK79;P67936	P67936	TPM4	6.56	2.32e-05	0.808
AADHYSQQMAQQLR	Q96PP9	Q96PP9	GBP4	3.29	2.33e-05	0.808
AQVQLQLFK	Q14683;G8JLG1	Q14683	SMC1A	4.1	2.33e-05	0.808
LIITQVR	A0A804HHY9;A0A804HJA1;A0A804HKK7;A0A804HKX6;A0A804HIG4;P42704;A0A804HI14;A0A804HKJ0;A0A804HL40;A0A804HK30;A0A804HIN4;A0A804HKI2;A0A804HKR3;A0A804HJZ1;A0A804HLG8;A0A804HIQ7;A0A804HI40;A0A804HJI0	A0A804HIG4	LRPPRC	5.63	2.35e-05	0.809
NHDHQEIAVPVANLK	O75607	O75607	NPM3	3.94	2.35e-05	0.809
ELVVTQLGYDTR	Q01813;A0A7I2V3Z0;B1APP6;V9GY25	Q01813	PFKP	4.49	2.35e-05	0.809
MGELPLDINIQEPR	Q9BWM7;S4R3N9	Q9BWM7	SFXN3	3.78	2.35e-05	0.809
GMITVTDPDLIEK	A0AVT1;H0Y8S8	A0AVT1	UBA6	4.62	2.37e-05	0.809
GVQSLVLGAPR	H3BN02;P20702	H3BN02	ITGAX	4.45	2.39e-05	0.809
GGGGSFGYSYGGGSGGGFSASSLGGGFGGGSR	P35527;CON__P35527	P35527	KRT9	4.52	2.4e-05	0.81
HGDEIITSTTSNYETQTFSSK	Q6P2Q9	Q6P2Q9	PRPF8	4.17	2.41e-05	0.81
AALPAQELEEYNK	P12821;A0A0A0MSN4;F6X3S4;J3KSQ5	P12821	ACE	5.12	2.43e-05	0.81
ATLYVTAIEDR	Q99873;E9PKG1;E9PIX6;E9PQ98;H0YDE4;E9PNR9	Q99873	PRMT1	4.6	2.43e-05	0.81
ESQVYLLGTGLR	Q13094;E7ESF6	Q13094	LCP2	4.23	2.44e-05	0.811
VGETIIDLENR	Q9NZM1;H0YD14	Q9NZM1	MYOF	4.06	2.44e-05	0.811
HPFAQAVGR	A0A087WZN1;O43837;A0A087X2E5;A0A0D9SG66	A0A087WZN1	IDH3B	3.85	2.45e-05	0.811
QSLEASLAETEGR	A0A1B0GVI3;CON__P13645;P13645;CON__P02535-1	A0A1B0GVI3	KRT10	5.24	2.45e-05	0.811
LATISVNK	Q8NBM8;D6R9J0	Q8NBM8	PCYOX1L	3.35	2.45e-05	0.811
VSALNVLR	O75746	O75746	SLC25A12	3.85	2.46e-05	0.811
ALIVVQQGMTPSAK	P19388;A0A0A0MQR7;A0A087WVZ9;A0A087WWX0;A0A087WVN5	P19388	POLR2E	4.02	2.48e-05	0.811
IPIAGTVVTR	Q15052	Q15052	ARHGEF6	4.58	2.49e-05	0.812
NTEISFK	P05413;S4R371;S4R3A2;P02689	P05413	FABP3;PMP2	4.98	2.49e-05	0.812
APIFTSEHGEK	O43639	O43639	NCK2	3.75	2.49e-05	0.812
GFPLVTVQK	Q9UIQ6	Q9UIQ6	LNPEP	3.92	2.51e-05	0.812
SLDGFTIQVFTK	P29728;A0A087X0V5;A0A7P0T8H9;F8VPI5;A0A7P0TAV1	P29728	OAS2	4.24	2.51e-05	0.812
LQEAQLELADIK	E1CKY7;O60237	O60237	sm-M20;PPP1R12B	4.48	2.51e-05	0.812
VSASPLLYTLIEK	P02786;G3V0E5	P02786	TFRC	5.14	2.51e-05	0.812
MDENQFVAVTSTNAAK	Q14195;H0YBT4;A0A1C7CYX9;Q16555;E9PD68;Q14194	A0A1C7CYX9	DPYSL3;DPYSL2;CRMP1	3.96	2.52e-05	0.812
INSDGSSTSYADSVK	sp|A043522|abysis_43522;sp|A043790|abysis_43790;sp|A047689|abysis_47689;sp|A073509|abysis_73509;sp|A066716|abysis_66716;sp|A066682|abysis_66682;sp|A042394|abysis_42394;sp|A042424|abysis_42424;sp|A076582|abysis_76582;sp|A066570|abysis_66570;sp|A076623|abysis_76623;sp|A041553|abysis_41553;sp|A005521|abysis_5521;sp|A033931|abysis_33931;sp|A076535|abysis_76535;sp|A066630|abysis_66630;sp|A020055|abysi…	sp|A043522|abysis_43522	IGHV3-74	4.96	2.52e-05	0.812
EKEIAFLSEK	Q70UQ0	Q70UQ0	IKBIP	3.95	2.52e-05	0.812
FGDPLGYEDVIPEADREGVIR	P11215	P11215	ITGAM	3.67	2.52e-05	0.812
ALNMAIPGGPK	Q6P2Q9;I3L0J9	Q6P2Q9	PRPF8	4.97	2.52e-05	0.812
TPESSPPGTPIGR	P55285;D6RF86	P55285	CDH6	3.72	2.53e-05	0.812
ASASDGSSFVVAR	Q9H4G4;Q5VZR0;A0A087WUM5	Q9H4G4	GLIPR2	4.76	2.53e-05	0.812
ETLDQINQELIQAK	A0A0A0MTR7;A0A0A0MTC1;Q63HN8	A0A0A0MTR7	RNF213	4.22	2.53e-05	0.812
AVQFTEEK	Q9Y371;A0A087WW40;B7ZC38;Q9NR46;B7ZC39;F8WFB9	B7ZC38	SH3GLB1;SH3GLB2	6.26	2.55e-05	0.813
SLQLQLQAPSGNTVPAR	O75843	O75843	AP1G2	3.4	2.56e-05	0.813
ALAAGGYDVEK	P16401	P16401	HIST1H1B	4.8	2.56e-05	0.813
GEADAMSLDGGYVYTAGK	E7EQB2;E7ER44;P02788	E7EQB2	LTF	6.05	2.56e-05	0.813
TQPGLPYSQVR	P19878;B1ALB7;B1ALB6	P19878	NCF2	3.7	2.56e-05	0.813
ALNSIIDVYHK	P05109	P05109	S100A8	5.7	2.56e-05	0.813
VPTMALTVGVGTVMDAR	P46926;D6R9P4;D6RFF8;Q8TDQ7;V9GYK3	P46926	GNPDA1;GNPDA2	6.18	2.57e-05	0.813
GIKEEVQLTSK	Q92616	Q92616	GCN1L1	4.04	2.58e-05	0.813
MVTAVASALSSR	P69891;A0A2R8Y7X9	P69891	HBG1	5.66	2.58e-05	0.813
GAALITAVAK	Q2TB90	Q2TB90	HKDC1	5.19	2.59e-05	0.814
ADVVLLTASGPAVK	Q96RQ9	Q96RQ9	IL4I1	4.73	2.59e-05	0.814
LLLIGNSSVGK	O95716	O95716	RAB3D	3.92	2.59e-05	0.813
AGVSTNISTK	P52948;A0A3B3ITD8	P52948	NUP98	4.42	2.61e-05	0.814
KDNIQAMVIVPTR	P26196	P26196	DDX6	3.76	2.62e-05	0.814
DVSVPVAEIK	Q6VY07;E9PPK2	Q6VY07	PACS1	3.89	2.62e-05	0.814
GSEQESVKEFLAK	P17612;K7ENJ5	P17612	PRKACA	3.98	2.62e-05	0.814
DGQILPVPNVVVR	Q9P258	Q9P258	RCC2	4.58	2.62e-05	0.814
QSVLTQPPSVSAAPGQK	sp|A044014|abysis_44014;sp|A037710|abysis_37710;sp|A037036|abysis_37036;sp|A036986|abysis_36986;sp|A043170|abysis_43170;sp|A058267|abysis_58267;sp|A034278|abysis_34278;sp|A062158|abysis_62158;sp|A037876|abysis_37876;sp|A062310|abysis_62310;sp|A018437|abysis_18437;sp|A023806|abysis_23806;sp|A006704|abysis_6704;sp|A063396|abysis_63396;sp|A084536|abysis_84536;sp|A083912|abysis_83912;sp|A009466|abysi…	sp|A058267|abysis_58267		3.37	2.63e-05	0.814
KMVGDVTGAQAYASTAK	Q01628;E9PS44;A0A7P0T9Q3;H7BYV1;A0A7P0T8E0;P13164;E9PQN9;A0A7P0T953;Q01629	Q01628	IFITM3;IFITM2;IFITM1	4.55	2.63e-05	0.814
LTAAPFITR	Q16647	Q16647	PTGIS	6.08	2.64e-05	0.815
RPISADSAIMNPASK	A0A087WVQ6;Q00610;J3KS13;J3KSQ2;J3QL20	A0A087WVQ6	CLTC	6.07	2.65e-05	0.815
ALLPELR	A0A7P0TAQ9;Q8IXB1;A0A7P0Z431;A0A7P0TB97	A0A7P0TAQ9	DNAJC10	3.8	2.65e-05	0.815
KPASEMQLQVQSQQEELEQLKK	Q9UPU7;C9JW56	Q9UPU7	TBC1D2B	3.96	2.65e-05	0.815
FVVLADPR	Q9Y296;E9PQE8;E9PN70;E9PKS9	Q9Y296	TRAPPC4	3.26	2.65e-05	0.815
VSIYGVIR	J3QSU6;P24821;E9PC84	P24821	TNC	4.1	2.66e-05	0.815
IAVISGVGTR	Q9H9T3;B4DKA4	Q9H9T3	ELP3	3.34	2.67e-05	0.815
QGNMTAALQAALK	O15511;B1ALC0	O15511	ARPC5	5.81	2.69e-05	0.815
LAALQGR	Q07065;H3BRF9;Q96K21;H3BN64;H3BRM1;H3BUW6	Q07065	CKAP4;ZFYVE19	3.83	2.69e-05	0.815
SLNTGIITVQNYGSHVPPK	O14672;H0YNC5	O14672	ADAM10	3.97	2.7e-05	0.816
ITVVDALHEIPVKK	Q16270	Q16270	IGFBP7	4.26	2.7e-05	0.816
QPVTGTEGAFYR	Q9NZU5;B4DEY6;H7C3D2;C9IYS1	Q9NZU5	LMCD1	3.69	2.7e-05	0.816
ILMAIDSELVDRDVVHTSEEAR	O43592;F8WDU6	O43592	XPOT	3.47	2.7e-05	0.816
KESLDVYELDAK	Q13510;A0A1B0GTZ5;A0A1B0GTM3;A0A1B0GUA4;A0A1B0GW68;E7EMM4;A0A1B0GUH5;A0A1B0GTP7;A0A1B0GUW4;A0A1B0GUG1;A0A1B0GUE3;A0A1B0GV06	Q13510	ASAH1	4.11	2.72e-05	0.816
MQSPAVLVTSR	Q53T59;F6TR53;B5MC96;A0A494C0K6;A0A0D9SFN1	Q53T59	HS1BP3	3.71	2.72e-05	0.816
FEQSASNFYQQQAEGHK	Q9UBW5	Q9UBW5	BIN2	4.1	2.73e-05	0.816
ALAFYAVR	Q96LD4	Q96LD4	TRIM47	3.65	2.73e-05	0.816
RALIVLAHSER	B4DLR8;P15559;H3BRK3	B4DLR8	NQO1	4.11	2.75e-05	0.816
GVPAGYAITGGDK	0	REV__sp|A059205|abysis_59205		3.92	2.76e-05	0.817
DAGEGGLSLAIEGPSK	P21333;Q60FE5	P21333	FLNA	5	2.76e-05	0.817
QLVTITTK	Q14161;F8VXI9	Q14161	GIT2	3.8	2.76e-05	0.817
EITGIGPSTTTETETIAK	O75436;S4R3Q6	O75436	VPS26A	3.03	2.76e-05	0.817
VPLKVEQANNAR	A0A1Y0BRN3;A0A590UJ40;A0A0A0MRM8;Q9UM54;A0A0D9SGC1;A0A590UKB0;A0A590UJ75;A0A590UK22;A0A590UK86;A0A5F9ZI03;A0A590UJY4;A0A590UK71	A0A1Y0BRN3	MYO6	3.71	2.77e-05	0.817
FQAPTGEEK	Q8TD55;C9J4A7	Q8TD55	PLEKHO2	4.39	2.77e-05	0.817
SSASFNVIEFPYK	P06756;H7BZG1	P06756	ITGAV	4.79	2.78e-05	0.817
IELIQGSK	O00329;F8W9P4	O00329	PIK3CD	3.69	2.78e-05	0.817
ETFTTGLDAPR	F5H7V9;J3QSU6;P24821;E9PC84	P24821	TNC	5.64	2.79e-05	0.817
IEELQEALR	Q86VS8;H0YDM4	Q86VS8	HOOK3	3.52	2.8e-05	0.817
ALLTLADGR	D6RA82;P12429	P12429	ANXA3	5.39	2.82e-05	0.818
SEATFQFTVER	Q93009;A0A669KBL1;F5H2X1;H3BQD1;H3BUV0;H3BTM1;H3BRA2;H3BMF6	Q93009	USP7	3.59	2.82e-05	0.818
LATALSLSNK	P04114	P04114	APOB	5.67	2.83e-05	0.818
KAGVDPLVPLR	Q9UJ70;H7C3G9;C9JEV6;H7C1L7;H0YEB7;H0YE82	Q9UJ70	NAGK	4.79	2.84e-05	0.818
SSMDGAGAEEVLAPLR	P41250;A0A6Q8PGZ8;A0A6Q8PHH9;A0A6Q8PHI7;H7C443;A0A6Q8PFZ6;A0A6Q8PH49;A0A6Q8PF45;A0A6Q8PGN7;F8WCK4;A0A6Q8PGZ9;A0A6Q8PFV5;A0A6Q8PGT3;A0A6Q8PFN0;A0A6Q8PFU7	P41250	GARS	3.63	2.85e-05	0.818
GVNQATAGVVASTISGK	O00291	O00291	HIP1	4.11	2.85e-05	0.818
LLQASFK	Q15555;K7EL66;K7ERD8;M0QX52	Q15555	MAPRE2	4.06	2.87e-05	0.819
KRDPPSEPSPLEAEFQR	P08575	P08575	PTPRC	5.05	2.88e-05	0.819
GFSLDQTGSSCEDVDECEGNHR	P35555	P35555	FBN1	3.8	2.89e-05	0.819
QLTVGVPK	Q13423;A0A590UK15;A0A590UJM2;A0A590UK29;D6RAI5;D6RHU2;A0A590UJA4;A0A590UKC7	Q13423	NNT	5.02	2.89e-05	0.819
QANTGLFNLR	P52888;K7EP46;K7EL02;K7EMU4;K7EIK4;K7EL32	P52888	THOP1	3.92	2.9e-05	0.819
LQASISAFR	Q27J81;A0A6Q8PHA2;A0A6Q8PH71;A0A6Q8PGN3;A0A6Q8PHG2;A0A6Q8PF44;A0A6Q8PH25;A0A6Q8PF29;A0A6Q8PFW4;A0A0A0MQU1;A0A087X118;A0A6Q8PGC7;A0A6Q8PHS8	Q27J81	INF2	4.93	2.91e-05	0.819
LGVTNTIISHYDGR	P46087	P46087	NOP2	4.31	2.91e-05	0.819
ELPQSIVYK	Q12805;A0A0U1RQV3	Q12805	EFEMP1	4.85	2.93e-05	0.819
GVTLGFR	P32969;A0A2R8Y5Y7;D6RAN4;H0Y9V9	P32969	RPL9	6.35	2.94e-05	0.82
ADVLSVLR	Q6P1J9;A0A3B3IRP5;A0A1B0GUB2;A0A2R8YHB3;A0A2R8Y640;A0A3B3ISN2	Q6P1J9	CDC73	3.71	2.95e-05	0.82
VTATECIQEQSFVIR	A0A494C0X7;P05107;D3DSM0	A0A494C0X7	ITGB2	4.38	2.95e-05	0.82
LQLTESHDVYR	0	REV__E5RIK9		3.79	2.99e-05	0.82
VRGEPLQVER	P09758	P09758	TACSTD2	5.55	2.99e-05	0.82
VQTGEEGMPLSTIR	Q00534	Q00534	CDK6	3.63	3e-05	0.821
VFAILENKK	F5H7V9;J3QSU6;P24821;E9PC84	P24821	TNC	5.75	3.04e-05	0.821
GAALVTAVACR	P52790	P52790	HK3	3.66	3.05e-05	0.821
LKDENGALIR	E1CKY7;O14974;O60237	O14974	sm-M20;PPP1R12A;PPP1R12B	4.66	3.05e-05	0.821
TVSLSQMLR	Q8IWE2	Q8IWE2	FAM114A1	3.26	3.06e-05	0.822
QSLEYLEQVR	Q9BZE4;Q5T3R7	Q9BZE4	GTPBP4	3.34	3.06e-05	0.821
LAALSASLAR	B5MCF9;O00541;B3KXD6	B5MCF9	PES1	4	3.08e-05	0.822
ERQEAEEAKEALLQASR	P26038	P26038	MSN	6.69	3.11e-05	0.822
LQGLIPGAR	A0A140TA33;A0A140T902;A0A140TA41;A0A140T9C0;P22105;A0A140TA52;A0A140T8Y3;A0A140T8Z8;A0A140T9L7;A0A087X0I0;A0A3B3ISX9	A0A3B3ISX9	TNXB	5.34	3.11e-05	0.822
REIGILTTNK	E7EW77;E7EP65;A0A0C4DG21;A0A7D9NKC8;F8WAL6;Q9NYB9;E9PEZ7;Q8IZP0;A0A0A0MRT6;B6VEX4	Q8IZP0	ABI2;ABI1	3.56	3.12e-05	0.822
VSFSPAR	P20701;A0A7I2V5G1	P20701	ITGAL	4.18	3.12e-05	0.823
IAYEFVEMK	P00813;F5GWI4;F5GXW0	P00813	ADA	4.54	3.14e-05	0.823
VTKPNIPEAIR	O94905;E5RHW4;E5RJ09	O94905	ERLIN2	5.73	3.14e-05	0.823
RTPDGTENGDFLALDLGGTNFR	P19367	P19367	HK1	3.51	3.15e-05	0.823
GYLDDPTVPR	P11413;E7EUI8	P11413	G6PD	4.34	3.16e-05	0.823
KIQALQQQADEAEDR	A0A2R8Y5V9;A0A2R8YGX3;A0A590UJB9;A0A590UK79;P67936	P67936	TPM4	7.54	3.16e-05	0.823
AAAAELSLLEK	O43324;D6RBD7;C9J1V9	O43324	EEF1E1;EEF1E1-BLOC1S5	5.04	3.17e-05	0.823
ALVTGYFMQVAHLER	O43143	O43143	DHX15	4.4	3.18e-05	0.823
NDSLAGVVIADNEYPSR	A0A7I2V4L6;O15498;A0A7I2V3A1;A0A7I2V3V7	A0A7I2V4L6	YKT6	4.52	3.18e-05	0.823
LKPYGALVDK	P12109	P12109	COL6A1	7.02	3.19e-05	0.824
VVVPPLPGK	O60493	O60493	SNX3	5.5	3.19e-05	0.823
MREEVITLIR	P46940;A0A0J9YXZ5;H0YLE8	P46940	IQGAP1	4.54	3.2e-05	0.824
LGLLEVK	Q53F23;P24557;A0A0C4DH47	Q53F23	TBXAS1	3.56	3.21e-05	0.824
AALEAVGGTVVLE	P52815	P52815	MRPL12	4.66	3.23e-05	0.824
RILELSGSSSEDSEK	P78527	P78527	PRKDC	3.26	3.23e-05	0.824
RAEQLLQDAR	P55268	P55268	LAMB2	3.77	3.26e-05	0.825
SSFSESALEK	Q9NQG5;E9PIQ9;E9PQF3	Q9NQG5	RPRD1B	3.7	3.27e-05	0.825
AVPQSPENVAK	Q709C8	Q709C8	VPS13C	4.19	3.27e-05	0.825
ASFTNSELHR	Q9H3S7	Q9H3S7	PTPN23	3.52	3.28e-05	0.825
KVPQVSTPTLVEVSRNLGK	CON__P02768-1;P02768;A0A0C4DGB6;B7WNR0;H0YA55;D6RHD5;C9JKR2;A0A087WWT3	CON__P02768-1	ALB	4.67	3.3e-05	0.825
EVIDMELSALR	A0A0A0MTR7;A0A0A0MTC1;Q63HN8	A0A0A0MTR7	RNF213	4.27	3.3e-05	0.825
GIFGSSAVPQPK	O60341;A0A8I5KXU4;R4GMQ1;A0A8I5KV76;A0A8I5KVZ4;A0A8I5KSH0;A0A8I5KT29;A0A8I5QKM3;A0A8I5KRB8;A0A8I5QJJ5;A0A8I5KRX9;A0A8I5KQU6;A0A8I5QJR3;R4GMP9;A0A8I5KSI8	O60341	KDM1A	3.5	3.31e-05	0.825
RAEFTVETR	P21333;A0A7P0NMY4;A0A087WWY3;A0A7I2V3E6;Q60FE5;F8WE98	P21333	FLNA	4.98	3.32e-05	0.825
ATNAQFDSPEILR	Q96CW5	Q96CW5	TUBGCP3	3.36	3.32e-05	0.825
QIALAVLSTELAVR	P27708;F8VPD4	P27708	CAD	3.9	3.33e-05	0.826
LDRLEETVQAK	P31146;H3BRY3	P31146	CORO1A	3.7	3.33e-05	0.825
STELNEEPLMR	P12111;E7ENL6;A0A804HKC7	P12111	COL6A3	6.7	3.34e-05	0.826
GISPVPINLR	P50570;A0A0D9SFB1;A0A1B0GU67;A0A1B0GUX5;A0A0U1RQP1;Q05193;A0A0D9SFE4	P50570	DNM2;DNM1	6.05	3.34e-05	0.826
GNFNSTVNNTVTVR	A0A2R8YD85;Q96BY6	A0A2R8YD85	DOCK10	3.14	3.35e-05	0.826
LSGEAFDINK	Q8TEQ6	Q8TEQ6	GEMIN5	3.35	3.36e-05	0.826
NSVAYMDQQTGNLK	P02452;CON__Q862S4	P02452	COL1A1	3.78	3.38e-05	0.826
EAGAGGLAIAVEGPSK	P21333;A0A7P0NMY4;H0Y5C6;Q60FE5	P21333	FLNA	4.15	3.4e-05	0.826
LGVSGYLVSR	H7C5E4;Q8IZH2	Q8IZH2	XRN1	3.26	3.4e-05	0.826
QVTVLELFR	P11169	P11169	SLC2A3	4.26	3.41e-05	0.827
MEALGFLK	Q53F23;P24557;A0A0C4DH47;A0A0A0MSK3;C9JS68;A0A498U6I9;F8WD37;F8WC80	Q53F23	TBXAS1	3.35	3.43e-05	0.827
SSGLPNIPVQTISR	P02786;G3V0E5	P02786	TFRC	5.34	3.43e-05	0.827
ESGMNLNPEVEGTLIR	Q96E11	Q96E11	MRRF	4.26	3.45e-05	0.827
VVLAPQDVVVAR	Q13308;Q86X91	Q13308	PTK7	4.12	3.45e-05	0.827
YLENGKETLQR	Q5SPM2;A0A140T8Y4;A0A140T8W8;A0A1W2PR61;A0A1W2PPF8;A0A0G2JPD3;B0UXQ0;A0A140T941;A0A1W2PQS8;A0A140T9Z6;A0A140T912;O78179;A0A1W2PRZ0;A0A140T937;A0A140T930;A0A140T9M5;A0A140T9H5;O19617;A0A140T921;A0A140T9U8;A0A140TA05;A0A140T9L3;A0A140T9J9;Q5QT33;A0A1W2PR11;A0A140T962;A0A140T9B3;A0A140T9E1;A0A140T942;Q53Z42;A0A140T9I0;A0A140T9X5;A0A140T913;A0A140T955;A0A140T933;A0A1W2PRT9;A0A1W2PPQ2;Q5SUL5;A0A0G2JIF…	Q53Z42	HLA-A;HLA-C;HLA-B;HLA-F	6	3.46e-05	0.827
SYESLFIR	O75718;C9JP16	O75718	CRTAP	3.72	3.48e-05	0.827
LKHEDTNLASSTIVK	P32121;Q68DZ5	P32121	ARRB2;DKFZp686L0365	3.95	3.49e-05	0.828
KENSETVVTGSLDDLVK	Q9GZS3;H0YN81;H0YMF9;H0YM76	Q9GZS3	WDR61	3.27	3.49e-05	0.828
ALFLASR	P08648	P08648	ITGA5	3.67	3.51e-05	0.828
QLDMSPDPK	P12111;E7ENL6	P12111	COL6A3	5.34	3.52e-05	0.828
LAGAQAIFEAQQLAGVR	Q8IV04	Q8IV04	TBC1D10C	3.5	3.55e-05	0.828
VQVEYK	E9PKE3;E9PPY6;E9PN25;P11142;E9PLF4;E9PQQ4;E9PQK7;P54652;E9PK54;E9PN89	P11142	HSPA8;HSPA2	6.61	3.58e-05	0.829
AQAALAVNISAAR	P40227	P40227	CCT6A	5.63	3.59e-05	0.829
GTLLAFAEAR	Q99519;E9PIF4	Q99519	NEU1	3.72	3.6e-05	0.829
IPSETLNR	Q15582;H0Y8L3;S4R3C6;H0Y9D7	Q15582	TGFBI	5.79	3.61e-05	0.829
AVIHYRDDETMYVESK	O15144	O15144	ARPC2	5.75	3.62e-05	0.829
LQSQVLQAMR	Q9BU61	Q9BU61	NDUFAF3	4.52	3.62e-05	0.829
VGVSMFNRPH	Q9P0S9	Q9P0S9	TMEM14C	5.66	3.62e-05	0.829
ISEVLDAGTVDPLTK	P50452;A0A1B0GU38;H7BXK7;C9JVA8	P50452	SERPINB8	4.7	3.63e-05	0.829
ILGATIENSR	CON__P08727;P08727	CON__P08727	KRT19	6.15	3.65e-05	0.83
AVASDFYLR	Q96A72;F5H6N1;F5H124	Q96A72	MAGOHB	4.59	3.65e-05	0.83
IREEFPDR	P04350;Q9BUF5;K7ESM5;M0QYM7;M0R042;K7ES63	P04350	TUBB4A;TUBB6	4.89	3.67e-05	0.83
AFYAPVHADDLR	P55011;G3XAL9	P55011	SLC12A2	4.11	3.68e-05	0.83
IQQQAETTSEELGAVTVK	Q70J99	Q70J99	UNC13D	3.65	3.68e-05	0.83
GTLVTVSSASPTSPK	sp|A024317|abysis_24317;sp|A035607|abysis_35607;sp|A032734|abysis_32734;sp|A032721|abysis_32721	sp|A024317|abysis_24317		4.29	3.69e-05	0.83
TQQFIPVK	P20718	P20718	GZMH	3.71	3.7e-05	0.83
VTSTLTIK	sp|A008822|abysis_8822;P01871;sp|A057527|abysis_57527;sp|A034261|abysis_34261;sp|A081288|abysis_81288;sp|A081302|abysis_81302	sp|A034261|abysis_34261	IGHM	6.32	3.71e-05	0.83
ELGVSTNANYK	Q8WVY7	Q8WVY7	UBLCP1	3.79	3.71e-05	0.83
MALSFVQR	A0A096LP07;A0A096LPJ3;A8K070;J3KSA5;J3QLT0;J3KRJ4;J3QS88;J3KTB0;J3QS84;J3QLE8;J3QL53;J3KRE8;C9JFE4;Q13098	C9JFE4	GPS1	4.02	3.72e-05	0.83
KESDLNGAQIK	P20700;E9PBF6;A0A0D9SFE5;A0A0D9SFY5	P20700	LMNB1	4.27	3.72e-05	0.83
GVVMLNR	P18031;B4DSN5	P18031	PTPN1	3.46	3.72e-05	0.83
AGVIFPVGR	A0A7I2V423;A0A7I2YQR8;A0A7I2V6E9;A0A7I2V2N7;A0A7I2V4D9;A0A7I2YQB9;Q9P0M6;A0A7I2V412;Q5SQT3;A0A7I2YQD6;O75367;A0A8I5KRC6;B4DJC3;D6RCF2	O75367	H2AFY2;H2AFY	7.76	3.73e-05	0.831
EGATVYATGTHAQVEDGR	P32322;E2QRB3;J3KQ22;J3QL24;J3QKT4;J3QR88;J3QLK9;J3QL32;J3QL23	P32322	PYCR1	3.97	3.73e-05	0.831
LMIYEVSNRPSGVSNR	sp|A043175|abysis_43175;sp|A043197|abysis_43197;sp|A086806|abysis_86806;sp|A037632|abysis_37632	sp|A043175|abysis_43175		5	3.78e-05	0.831
LICQATGFSPR	sp|A008822|abysis_8822;P01871;sp|A057527|abysis_57527;sp|A034261|abysis_34261;sp|A081288|abysis_81288;sp|A081302|abysis_81302	sp|A034261|abysis_34261	IGHM	6.23	3.79e-05	0.831
NSPQEEVELKK	J3QTA2;Q99933;C9JYK5;A0A0U1RR89	J3QTA2	BAG1	3.86	3.8e-05	0.831
DPAGMPHPETGKDLYEPSHGAK	O43252	O43252	PAPSS1	3.75	3.84e-05	0.832
LYTVEYLSNMVGGR	Q13867;K7ES02;K7ESE8;J3KSD8	Q13867	BLMH	3.67	3.85e-05	0.832
VNIVPVIAK	B5MCX3;C9J2Q4;H7C2Y0;H7C310;Q15019	Q15019	37500	6.83	3.86e-05	0.832
DTLTSRPAQGVVTTLENVSPPRR	H0Y7Z1;P02751	P02751	FN1	5.48	3.89e-05	0.832
MSNWNFPIFELVEK	Q13370	Q13370	PDE3B	3.45	3.9e-05	0.833
ALLSAVTR	P26232;P35221;G3XAM7;E5RIB1;E5RG03;E5RGY6;E5RJ41	P35221	CTNNA2;CTNNA1	5.18	3.92e-05	0.833
VTSDPQSNDIMLVK	P49863	P49863	GZMK	4.3	3.94e-05	0.833
EGAQYLMQAAGLGR	P55011;G3XAL9	P55011	SLC12A2	3.61	3.95e-05	0.833
SIDGAYTIR	P19320;E9PDD2	P19320	VCAM1	4.65	3.95e-05	0.833
KIFTFAEK	P54577;A0A6Q8PFX2;A0A0C4DGZ5;A0A6Q8PFX4	P54577	YARS	4.78	3.95e-05	0.833
AAYLQETGKPLDETLK	P04083;Q5T3N1;Q5T3N0	P04083	ANXA1	5.25	3.97e-05	0.833
LFQSNDPTLRR	Q9Y678	Q9Y678	COPG1	3.64	3.97e-05	0.833
GVVVVIK	H0YKD8;P46779;H0YMF4	H0YKD8	RPL28	5.76	4e-05	0.834
REPFLLSGGDDGALK	Q9BQ67	Q9BQ67	GRWD1	3.51	4.01e-05	0.834
NLPVFQPGVK	Q9UPT5;A0A0A0MSB8;B4DJ07;A0A0A0MRE1	Q9UPT5	EXOC7	2.99	4.03e-05	0.834
ALEEANTELEVK	CON__Q04695;Q04695;K7EPJ9	CON__Q04695	KRT17	5.8	4.04e-05	0.834
LFEAPNFFQK	P51003;G3XAH6	P51003	PAPOLA	3.32	4.04e-05	0.834
TSTDLDVDVDQPKEEK	Q14766;E7EV71;H7C0I7	Q14766	LTBP1	3.79	4.07e-05	0.834
SAVITSLDPGRK	A0A140TA33;A0A140T902;A0A140TA41;A0A140T9C0;P22105;A0A140TA52;A0A140T8Y3;A0A140T8Z8;A0A140T956;A0A140T923;A0A3B3ISX9;A0A087WWA5	A0A3B3ISX9	TNXB	4.1	4.08e-05	0.834
VLQLMNLTDSR	Q9UIA9;E7ESC6	Q9UIA9	XPO7	3.93	4.08e-05	0.834
RCEPIAMTVPR	P31146;H3BRY3	P31146	CORO1A	4.84	4.09e-05	0.835
GVAIGQTSLTASVTNK	Q8TEM1	Q8TEM1	NUP210	4.11	4.09e-05	0.835
VAAALPGMESTQDR	P20340;F5H3K7	P20340	RAB6A	4.11	4.1e-05	0.835
GAFGEVQLVR	Q13464;A0A0U1RQV4;O75116;D6REE7;C9JFJ0	Q13464	ROCK1;ROCK2	4.89	4.1e-05	0.835
ALGFPLERPK	O75390;B4DJV2;A0A0C4DGI3	O75390	CS	6.61	4.11e-05	0.835
LGHPDTLNQGEFK	P06702	P06702	S100A9	4.35	4.11e-05	0.835
GFFLLVEGGR	P05186	P05186	ALPL	4.42	4.12e-05	0.835
FSVLGSGLNR	sp|A014548|abysis_14548;sp|A081160|abysis_81160;sp|A041288|abysis_41288;sp|A041276|abysis_41276;sp|A017275|abysis_17275;sp|A033637|abysis_33637;sp|A017230|abysis_17230;sp|A031077|abysis_31077;sp|A082158|abysis_82158;sp|A031055|abysis_31055;sp|A071545|abysis_71545;sp|A033626|abysis_33626;sp|A071546|abysis_71546;sp|A004816|abysis_4816;sp|A045630|abysis_45630;sp|A078587|abysis_78587;A0A0B4J1Y8;sp|A0…	sp|A014548|abysis_14548	IGLV9-49	4.13	4.13e-05	0.835
QFLAQVNK	Q9Y6K5;A0A7P0T9W6;A0A7P0T9J0;A0A7P0Z4D0;A0A7P0T8S7;A0A7P0TAU8;A0A7P0Z4F1;A0A7P0TAC0;A0A7P0Z4F5;A0A7P0T7V2	Q9Y6K5	OAS3	3.58	4.14e-05	0.835
MSVEADINGLRR	P02533;CON__P02533;CON__P08727;P08727;C9JM50;CON__Q6IFX2;K7EMS3	P02533	KRT14;KRT19	5.94	4.15e-05	0.835
NEEKPVQMMFK	A0A024QZX5;A0A087X1N8;P35237;A0A2R8YD12;A0A2R8Y6A7	A0A024QZX5	SERPINB6	5.97	4.16e-05	0.835
QAAASATQTIAAAQHAASTPK	Q9Y490	Q9Y490	TLN1	4.82	4.16e-05	0.835
LPDTPQGLLGEAR	P17813;F5GX88	P17813	ENG	5.27	4.17e-05	0.835
MDVFLMIR	Q15370;A0A8I5KUS5;A0A0B4J296	Q15370	TCEB2	3.23	4.17e-05	0.835
SGFPLLK	P12111	P12111	COL6A3	6.61	4.22e-05	0.836
GVVEVTHDLQK	P50454;E9PJH8;E9PKH2	P50454	SERPINH1	3.75	4.26e-05	0.836
VSSVSSSALVSSLHMMK	Q9UBF2	Q9UBF2	COPG2	3.87	4.28e-05	0.836
ELKEQLGEEIDSK	Q9NR30;A0A8I5KNP3;A0A8I5KNN2;A0A8I5KYZ4;A0A8I5KND9	Q9NR30	DDX21	3.61	4.28e-05	0.836
QINNVSAMLVLAR	O95967;H0YEU0;H0YCR9;E9PI47	O95967	EFEMP2	3.87	4.28e-05	0.836
DVPVVAILGSGGGFR	P47712	P47712	PLA2G4A	3.67	4.29e-05	0.837
KVPQVSTPTLVEVSR	CON__P02768-1;P02768;A0A0C4DGB6;B7WNR0;H0YA55;D6RHD5;C9JKR2;A0A087WWT3;CON__P02769	CON__P02768-1	ALB	4.26	4.31e-05	0.837
KVAVFFSNTPTR	P12111;E7ENL6	P12111	COL6A3	5	4.31e-05	0.837
QTYGDIEVDLKDTDK	P08575	P08575	PTPRC	4.59	4.31e-05	0.837
AEISDLDR	P60510;H3BTA2;H3BV22;I3L4X0;H3BPN5;H3BVE3	P60510	PPP4C	3.8	4.33e-05	0.837
AGVQEFVDGLHEK	Q9UK61;A0A087X0F1	Q9UK61	FAM208A	3.11	4.34e-05	0.837
GPIVPLNVADQK	P55011;G3XAL9	P55011	SLC12A2	3.96	4.36e-05	0.837
LSLQYEEAKR	Q6AWC2	Q6AWC2	WWC2	4.19	4.36e-05	0.837
EILQEIQR	E7EVB6;O60941;E9PEY4;A0A7P0T9L1;A0A7P0T8Y5;A0A7P0TBG1;A0A7P0Z4D7;A0A7P0TBH9;Q9Y4J8;A0A804HHT6;A0A804HHU2;A0A804HII3;A0A7P0T8G2	E7EVB6	DTNB;DTNA	3.41	4.39e-05	0.838
LALSIPAEK	Q9BZF9;H0YNH8;F5H2B9	Q9BZF9	UACA	3.36	4.4e-05	0.838
ITQLGQSAEDLQGSR	P21854;A0A6E1WA84	P21854	CD72	3.4	4.43e-05	0.838
LAQQMENRPSVQAALK	Q9Y3Y2;X6R700;A0A087X1B7;Q5T7Y7	Q9Y3Y2	CHTOP	3.91	4.43e-05	0.838
TTLTGLRPGTEYGIGVSAVK	F5H7V9;J3QSU6;P24821;E9PC84	P24821	TNC	4.81	4.44e-05	0.838
VMAAENIPENPLK	P42224;A0A669KB68;A0A669KB56;A0A669KBA4;A0A669KB53;A0A669KBI6;J3KPM9	P42224	STAT1	4	4.46e-05	0.838
GPQNAFFLVK	H0YE88;P28347;E9PKB7	H0YE88	TEAD1	3.4	4.49e-05	0.839
ILGSEGEPAFR	Q8TED1;E7ETY7	Q8TED1	GPX8	4.17	4.5e-05	0.839
TVLELIK	P29728;A0A087X0V5;F8W1C5;A0A7P0T8H9;F8VPI5;A0A7P0TAV1	P29728	OAS2	3.53	4.5e-05	0.839
KVPLDSSPATCHNNIMK	P04275	P04275	VWF	3.5	4.51e-05	0.839
SKFENEEFFR	Q13951;A0A494C0A9;H3BSC0;J3KRT0	Q13951	CBFB	5.26	4.54e-05	0.839
AVILQGSNDVELVAEGNSR	P08123	P08123	COL1A2	3.82	4.54e-05	0.839
ESISLLMR	P55160	P55160	NCKAP1L	4.05	4.6e-05	0.839
STLDTDYQMTK	P00813;F5GWI4	P00813	ADA	3.55	4.61e-05	0.84
EQADFALEALAK	M0QY43;Q7Z406	Q7Z406	MYH14	3.28	4.61e-05	0.84
EPQVYTLPPSRDELTK	sp|A008145|abysis_8145;sp|A008685|abysis_8685;sp|A008903|abysis_8903;sp|A008901|abysis_8901;sp|A024228|abysis_24228;sp|A024234|abysis_24234;sp|A024242|abysis_24242;sp|A024243|abysis_24243;sp|A024245|abysis_24245;sp|A024247|abysis_24247;sp|A024301|abysis_24301;sp|A024332|abysis_24332;sp|A024253|abysis_24253;sp|A024254|abysis_24254;sp|A024280|abysis_24280;sp|A024266|abysis_24266;sp|A024274|abysis_2…	sp|A024376|abysis_24376	IGHG1	7.2	4.63e-05	0.84
DIQMTQSPSSVSASVGNR	sp|A037044|abysis_37044	sp|A037044|abysis_37044		4.89	4.64e-05	0.84
ALEEQNELLSAELGGLR	P48681	P48681	NES	3.73	4.65e-05	0.84
PALPAGTEDTAKEDAANR	A0A0A0MS51;A0A0A0MT01;CON__Q3SX14;P06396;Q5T0I0	P06396	GSN	5.49	4.66e-05	0.84
LETNEFQQLQSK	Q70UQ0	Q70UQ0	IKBIP	4.78	4.67e-05	0.84
APIIAVTR	A0A804F6T5;A0A804F729;P14618;B4DNK4	P14618	PKM	7.68	4.68e-05	0.84
LVLVGDASVGK	Q86YS6;C9JFM7	Q86YS6	RAB43	5.68	4.69e-05	0.84
IEPPGLFR	P11387;Q969P6;E5RIC7;E5RJ95;E5RFS0	P11387	TOP1;TOP1MT	4.62	4.73e-05	0.841
GALTVGITNTVGSSISR	Q06210;A0A6I8PRN4;A0A6I8PTT9	Q06210	GFPT1	5.27	4.78e-05	0.841
AAMAQVIGDRVPK	Q02083;D6R9S9	Q02083	NAAA	3.33	4.79e-05	0.841
LEAIEDDSVKETDSSSASAATPSK	P54578;A6NJA2	P54578	USP14	5.61	4.79e-05	0.841
TAVFGFETSEAK	Q14764	Q14764	MVP	3.99	4.8e-05	0.841
AADFLSEPEGGPEMAK	A0A0A0MTR7;A0A0A0MTC1;Q63HN8	A0A0A0MTR7	RNF213	4.33	4.8e-05	0.841
KFADIGNTVK	P11172;E9PFD2	P11172	UMPS	4.04	4.81e-05	0.841
TLSGTPEVHSNKR	P12111	P12111	COL6A3	5.22	4.86e-05	0.842
ATAFPAEVK	A6NIW2;Q5JSL3;A0A0J9YW64	A6NIW2	DOCK11	3.54	4.86e-05	0.842
FAQQITGMR	A0A3B3ITT1;Q6IQ22	A0A3B3ITT1	RAB12	3.09	4.86e-05	0.842
QVMMFSATLSK	F6UJC5;A0A140TA18;A0A140T9X9;H0YCC6;Q13838;Q5STU3;A0A0G2JJZ9;A0A140T9X3;F6WLT2;A0A0A0MT12;F6TRA5;A0A140T996;A0A140T9K1;A0A140T973	Q13838	DDX39B	5.46	4.87e-05	0.842
AASAFFTYVSLSQEGR	O00154	O00154	ACOT7	4.33	4.92e-05	0.842
NNPSKPLHVIK	O75083	O75083	WDR1	5.17	4.94e-05	0.842
AANVLLSEHGEVK	B4DR80;Q9Y6E0;H0Y630	B4DR80	STK24	4.77	4.98e-05	0.843
KQAELEEIYESSIR	P48960	P48960	CD97	4.74	5.01e-05	0.843
SELTQDPAVSVALGQTVR	sp|A007953|abysis_7953;sp|A007957|abysis_7957;sp|A080991|abysis_80991;sp|A080990|abysis_80990;sp|A037296|abysis_37296;sp|A037293|abysis_37293	sp|A080991|abysis_80991		4.91	5.02e-05	0.843
QAVDVSPLRR	M0R0F0;P46782;M0R0R2;M0QZN2	M0R0F0	RPS5	5.48	5.02e-05	0.843
KIEEQLTLEK	P30740	P30740	SERPINB1	3.99	5.02e-05	0.843
RLTPLQLEIQR	G3V119;Q8N163;H0YB24	Q8N163	CCAR2	3.75	5.04e-05	0.843
LAQLLSR	A0A2R8YF87;A0A2R8Y5U3;Q96AX1;H3BMM5	Q96AX1	VPS33A	3.13	5.04e-05	0.843
SVLEIQGQELHR	A6NC98;H7BY33	A6NC98	CCDC88B	3.19	5.05e-05	0.843
SGDRGETGPAGPAGPVGPVGAR	P02452	P02452	COL1A1	4.53	5.06e-05	0.843
VQPNEAVYTK	P11413	P11413	G6PD	4.8	5.06e-05	0.843
SIAFPSIGSGRNGFPK	O75367;B4DJC3	O75367	H2AFY	3.6	5.06e-05	0.843
AFFTEEYVR	Q92608	Q92608	DOCK2	3.89	5.07e-05	0.843
SLVSGLIR	Q92616	Q92616	GCN1L1	4.22	5.08e-05	0.844
EVDSGNDIYGNPIKR	P16035	P16035	TIMP2	3.76	5.1e-05	0.844
SETAPAAPAAAPPAEK	P16403	P16403	HIST1H1C	3.62	5.11e-05	0.844
EGLAQQVQQSLEK	Q6ZMI0	Q6ZMI0	PPP1R21	4.03	5.12e-05	0.844
AGITTIEAVK	A0A087WWU8;D6R904;Q5VU61	A0A087WWU8	TPM3	7.79	5.12e-05	0.844
ALVQLPR	Q92917	Q92917	GPKOW	4.5	5.13e-05	0.844
ANDPSLQEVNLNNIK	Q9NZR1;G5EA42	Q9NZR1	TMOD2	3.44	5.13e-05	0.844
MEFQAVVMAVGGGSR	Q9NR50;A0A0D9SEN0	Q9NR50	EIF2B3	4.08	5.14e-05	0.844
ITLTCGR	P48444;B0YIW6	P48444	ARCN1	3.35	5.17e-05	0.844
LDAESDLQLAQIK	Q14997;F8WBH5	Q14997	PSME4	3.65	5.17e-05	0.844
NLILAGVK	Q9UBE0;B3KNJ4;A0A590UK93;A0A590UKC5;M0QZS6;M0QX65;A0A590UKA0	Q9UBE0	SAE1	3.81	5.17e-05	0.844
ALISPFDVIK	Q9HC21;J3KRY6;J3QLV3;J3KSI7;J3QL84;J3KS44;J3KSB1	Q9HC21	SLC25A19	3.45	5.19e-05	0.844
IAFSSTSLLK	Q9Y305;H7C5Q2	Q9Y305	ACOT9	5.49	5.21e-05	0.845
VVAHLTVQPR	Q92626;H7C1W1	Q92626	PXDN	5.59	5.21e-05	0.845
ALTSFLPAPTQLSQDQLEAEEK	Q13573;G3V3A4;G3V5R3	Q13573	SNW1	4.73	5.22e-05	0.845
VLVNEQGHYDAVTGK	Q9BXJ0	Q9BXJ0	C1QTNF5	4.48	5.26e-05	0.845
QAIPIGLQNR	Q9BUQ8;H0YI52	Q9BUQ8	DDX23	3.8	5.3e-05	0.845
QLAIIGDDINR	Q16611	Q16611	BAK1	3.45	5.32e-05	0.845
LQEIEGPSVSIMEK	Q05707;J3QT83	Q05707	COL14A1	4.07	5.33e-05	0.845
PFPDGLAEDIDKGEVSAR	P13639	P13639	EEF2	3.81	5.34e-05	0.845
KDGTHVVENVDATHIGK	P00488	P00488	F13A1	4.15	5.34e-05	0.846
ASQAGQTALMLAVSHGR	A0A8I5KT40;A0A8I5KRP2;A0A8I5KUM3;A0A8I5KZ49;A0A8I5KUD8;Q14678;A0A8I5KUI5;A0A8I5KXH8;A0A8I5QKT2;A0A8I5KP85;Q5W0W2;Q5W0W3;Q63ZY3;K7EIU4	Q63ZY3	KANK1;KANK2	4.67	5.35e-05	0.846
LFEVIETEK	E7ETY4;E9PC69;Q7KZI7;A0A7I2YQR3;A0A0A0MRU9;A0A7I2V3R3;F5H4F6;F5H6N2;K7EK17;K7EKG8;P27448;A0A7I2YQF7;A0A7I2V409;A0A7I2V2U9;A0A7I2V4K8;J3KNR0;A0A7I2V639;A0A7I2V5G3;A0A7I2V3B9;H0YJI9;A0A7I2V2N8;H0YNV4;A0A7I2V549;A0A7I2V602;A0A7I2V4G7;A0A7I2YQF4;H0YKP9;A0A7I2V4T2;A0A7I2V2I9;A0A7I2V3C6;A0A7I2V3P5;A0A7I2V4L1;A0A7I2V5H7	E7ETY4	MARK2;MARK4;MARK3	3.31	5.35e-05	0.846
LSCAASGFTFR	sp|A008453|abysis_8453;sp|A082653|abysis_82653;sp|A083004|abysis_83004;sp|A083857|abysis_83857;sp|A056114|abysis_56114;sp|A007934|abysis_7934;sp|A047864|abysis_47864;sp|A046905|abysis_46905;sp|A020518|abysis_20518;sp|A056645|abysis_56645;sp|A059651|abysis_59651;sp|A071363|abysis_71363;sp|A056969|abysis_56969;sp|A059036|abysis_59036;sp|A014243|abysis_14243;sp|A037734|abysis_37734;sp|A046810|abysis…	sp|A008453|abysis_8453		3.69	5.38e-05	0.846
KDGSCGVAYVVQEPGDYEVSVK	P21333;A0A7P0NMY4;H0Y5C6;Q60FE5	P21333	FLNA	4.14	5.38e-05	0.846
LVTQDTENELKK	P51692;A0A7I2V380;K7EIF9;K7EK35;A0A7I2YQY3;P42229;A0A7I2YQF1	P51692	STAT5B;STAT5A	4.59	5.38e-05	0.846
ISTAQVEDTGR	Q96RW7	Q96RW7	HMCN1	3.57	5.39e-05	0.846
FSPPPAMEK	Q08623;A0A590UJH7	Q08623	HDHD1	3.61	5.42e-05	0.846
TELQSALLLR	P62253;I3L0Q0;I3L2Q4	P62253	UBE2G1	4.43	5.44e-05	0.846
ALTEQQEQLR	Q86YV0;V9GYD1	Q86YV0	RASAL3	4.2	5.45e-05	0.846
KGQEEIVTLHAEIK	Q9BZF9;H0YNH8;F5H2B9	Q9BZF9	UACA	3.36	5.47e-05	0.846
AATASAGAGGIDGKPR	I3L1P8;Q02978	Q02978	SLC25A11	4.18	5.49e-05	0.847
FSGSNSGNTATLTITR	sp|A082354|abysis_82354;sp|A001499|abysis_1499	sp|A082354|abysis_82354		3.64	5.5e-05	0.847
KPEDRPNTSEILR	P19525;A0A7P0TAL9;A0A7P0TBA9;A0A7P0Z4M0	P19525	EIF2AK2	5.09	5.5e-05	0.847
ENGVHSLIIEPVTSR	Q8WX93;H0YA05	Q8WX93	PALLD	4.55	5.54e-05	0.847
AAAVPQR	Q00688;G3V5F2	Q00688	FKBP3	5.21	5.55e-05	0.847
AVASAAAALVLK	Q9Y490	Q9Y490	TLN1	5.04	5.57e-05	0.847
LLIYGNNNRPSGVPDR	sp|A008501|abysis_8501;sp|A071526|abysis_71526;sp|A023442|abysis_23442;sp|A004903|abysis_4903;sp|A023801|abysis_23801;sp|A012457|abysis_12457;sp|A039939|abysis_39939;sp|A004902|abysis_4902;sp|A005040|abysis_5040;sp|A020112|abysis_20112;sp|A005034|abysis_5034;sp|A012455|abysis_12455;sp|A005032|abysis_5032;sp|A004887|abysis_4887;sp|A005035|abysis_5035;sp|A005045|abysis_5045;sp|A004914|abysis_4914;s…	sp|A008501|abysis_8501		4.62	5.58e-05	0.847
LSIPEGK	P43405	P43405	SYK	4.38	5.62e-05	0.848
TEEVIVIAK	O43639;E7EPF5;E9PEE2;E7ERP6	O43639	NCK2	3.24	5.63e-05	0.848
AEDTAVYYCARVPGITMDR	sp|A013715|abysis_13715	sp|A013715|abysis_13715		3.66	5.64e-05	0.848
LGSLNLR	P11532;A0A5H1ZRP8;A0A075B6G3;A0A087WV90	P11532	DMD	5.41	5.65e-05	0.848
NYIQSLTQMPK	Q16539;B4E0K5	Q16539	MAPK14	4.14	5.7e-05	0.848
TMSAQIEGGVHGLHSYEK	P20839;C9J381	P20839	IMPDH1	3.79	5.71e-05	0.848
AFQSLLTEVNK	P50453	P50453	SERPINB9	5.21	5.71e-05	0.848
GPDPSSPAFR	P07996;A8MZG1;CON__Q28194	P07996	THBS1	5.31	5.71e-05	0.848
AGVLAHLEEERDLK	A0A8I5KZ38;P35580;P35579;A0A8I5KWT8	P35579	MYH10;MYH9	5.65	5.75e-05	0.848
AAMAVGGAGGSR	O14744;G3V580;G3V2L6;G3V2X6;C9JSX3;G3V507;G3V2F5	O14744	PRMT5	3.84	5.75e-05	0.848
VSGVTPQHMVGATPFAVAR	Q96AZ6;H0YMM4;H3BLY5	Q96AZ6	ISG20	4.78	5.78e-05	0.849
IIDLGYAK	O14920;A0A499FJS7;G3V105;A0A7P0SVL5;E5RGW5;A0A7P0NCV2;O15111	O14920	IKBKB;CHUK	3.47	5.81e-05	0.849
KQLADETLLK	P20700;E9PBF6;A0A0D9SFE5	P20700	LMNB1	5.78	5.81e-05	0.849
EVVVDLAMPMADGR	Q16647	Q16647	PTGIS	4.61	5.81e-05	0.849
DRLDEVKEQVAEVR	P02649	P02649	APOE	4.04	5.82e-05	0.849
KLFGQESGPSAEK	Q9BWH2	Q9BWH2	FUNDC2	4.11	5.85e-05	0.849
KSFEQISANITK	A0A2R8Y891;P08237;F8VZI0;F8VP00	A0A2R8Y891	PFKM	3.52	5.88e-05	0.849
LQEEITK	P54578;A6NJA2	P54578	USP14	5.41	5.88e-05	0.849
DYPDFSPSVDAEAIQK	P12429;D6RFG5;D6RCA8;D6RAZ8	P12429	ANXA3	5.78	5.89e-05	0.849
ASSLIEEAKK	Q9Y490	Q9Y490	TLN1	5.42	5.9e-05	0.849
VPFDAATLHTSTAMAAQHGMDDDGTGQK	A0A0A0MS51;A0A0A0MT01;P06396	P06396	GSN	3.64	5.93e-05	0.85
NPGNQAAYEHFETMK	P18206	P18206	VCL	2.95	5.94e-05	0.85
EAFTDADNFGIQFPLDLDVK	C9J7K9;O15162;H7C5I5	C9J7K9	PLSCR1	3.55	5.97e-05	0.85
HAQLLDAAK	P51606;A6NKZ2;H7C1A7	P51606	RENBP	4.4	5.98e-05	0.85
ATAAYEQLK	A0A5F9ZHN7;Q9NTJ5;F8WCQ2	A0A5F9ZHN7	SACM1L	5.14	5.99e-05	0.85
GPGAPCQDVDECAR	A0A0C4DH07;Q8N2S1	A0A0C4DH07	LTBP4	3.59	6e-05	0.85
SGSGTMNLGGSLTR	B1AK87;P47756;B1AK85;B1AK88	B1AK88	CAPZB	4.79	6.01e-05	0.85
VDPEIQNVK	CON__P35908;CON__P35908v2;P35908;CON__Q3TTY5	CON__P35908v2	KRT2	5.01	6.01e-05	0.85
YPMEHGIVK	P61163;R4GMT0;A0A1B0GVS3	P61163	ACTR1A	3.93	6.03e-05	0.85
VAAVGGQSYLSSILR	Q6VY07;B4DF77;E9PNZ9	Q6VY07	PACS1	3.76	6.03e-05	0.85
MEVGQYIFVK	P04839	P04839	CYBB	4.19	6.06e-05	0.85
ETTVLVAQNGNIK	P13611;E9PF17;D6RGZ6;Q86W61	P13611	VCAN	5.49	6.06e-05	0.85
LEILQLLK	Q96AZ6	Q96AZ6	ISG20	3.8	6.09e-05	0.851
GLGEISAASEFK	A0A087WTF6;A0A087WX77;A0A087WV75;H7BYX6;A0A087WTE4;A0A0D9SF98;A0A087WWJ5;A0A087WVU1;A0A087X1V2;A0A0C4DGS4;A0A087WWD4;P13591	A0A087WWD4	NCAM1	3.34	6.09e-05	0.851
VVTTFASAQGTGGR	P16452;F5H563;H3BPV8	P16452	EPB42	4.36	6.11e-05	0.851
LESDYEILER	P41252;A0A804HJN6;A0A804HHW9;A0A804HL54;A0A0A0MSX9;J3KR24;A0A804HJ36;A0A804HIV9;A0A804HKU1;A0A804HK69;A0A804HIG2	P41252	IARS	4.34	6.11e-05	0.851
ELESIISK	P28907	P28907	CD38	3.71	6.17e-05	0.851
VSYLVFDEADR	Q86XP3	Q86XP3	DDX42	3.3	6.21e-05	0.851
SIAENVAELQKQYSTHR	0	REV__O95347		6.9	6.22e-05	0.851
IDNYAVPVMDQYQR	0	REV__A0A2R8YE75		6.64	6.24e-05	0.852
DESLKVDEHLAK	D6RA82;D6RFJ9;P12429	P12429	ANXA3	5.59	6.25e-05	0.852
VTLLNAPTK	A0A7I2V5R1;Q8TD19;A0A7I2V454;G3V5V0;A0A7I2V4E9	A0A7I2V5R1	NEK9	4.55	6.25e-05	0.852
DGFFGNPLAPNPADK	P11047	P11047	LAMC1	3.66	6.26e-05	0.852
LSNKVEAIDVEEAKR	A0A3B3IU45;P33991;A0A3B3IT92;A0A3B3IS57;E5RG31	A0A3B3IU45	MCM4	4.41	6.27e-05	0.852
ATGEGFVEFR	Q9NTZ6	Q9NTZ6	RBM12	4.01	6.31e-05	0.852
FQSVFTVTR	P02747	P02747	C1QC	6.58	6.32e-05	0.852
IVAIAVGDSAAK	Q9UHN6;F5H6B2	Q9UHN6	TMEM2	3.42	6.33e-05	0.852
LPPGFSASSTVEKPSK	O75694;E9PF10	O75694	NUP155	3.93	6.34e-05	0.852
LGFGVSQTK	Q9BXD5	Q9BXD5	NPL	4.71	6.35e-05	0.852
GPGDLEAPSNLVISER	D6RGG3;Q99715;H0Y4P7	D6RGG3	COL12A1	4.7	6.36e-05	0.852
IEELLPGSSIDAETR	P50453	P50453	SERPINB9	5.76	6.36e-05	0.852
VTGESHIGGVLLK	Q86UX7;F5H1C6	Q86UX7	FERMT3	4.83	6.39e-05	0.852
LAFTDVSIK	A0A7P0T9R0;P20591;A0A7P0T9I6;H9KVC7	P20591	MX1	4.66	6.39e-05	0.852
LMQLTNVSR	Q9P0K7	Q9P0K7	RAI14	3.78	6.4e-05	0.852
NQSLIPLLLEAR	Q5VYY1	Q5VYY1	ANKRD22	3.92	6.41e-05	0.853
LKGDDLQAIK	A0A0G2JPF8;P0DMR1;B7ZW38;A0A0G2JNQ3;O60812;B2RXH8;G3V4W0;B4DY08;G3V4C1;P07910;G3V5V7	G3V4C1	HNRNPCL4;HNRNPCL3;HNRNPCL1;HNRNPCL2;HNRNPC	6.32	6.41e-05	0.853
DLIQMLVQR	Q02880;E9PCY5	Q02880	TOP2B	4.11	6.41e-05	0.853
VADYIPQLAK	O94925;H7BZD1	O94925	GLS	4.04	6.43e-05	0.853
AALPTPALSPEDK	Q9H3S7	Q9H3S7	PTPN23	4.18	6.44e-05	0.853
KSLEDVTAEYIHK	Q9P0K7	Q9P0K7	RAI14	3.19	6.45e-05	0.853
NKPVPDQIINFYK	Q92608	Q92608	DOCK2	3.62	6.46e-05	0.853
SEPKPGLPEDLQK	Q9BQ75;C9J384	Q9BQ75	CMSS1	3.21	6.51e-05	0.853
AELQMLLEEEIPSGK	Q8IZP0;A0A0A0MRT6;B6VEX4	Q8IZP0	ABI1	4.76	6.53e-05	0.853
LVGIVTSR	P20839;C9J381;A0A3B3IRL5;C9K0R9;C9J029;H7C5T1;H7C511	P20839	IMPDH1	3.25	6.53e-05	0.853
LQLVQLSK	Q7Z4H8;H0YEM3	Q7Z4H8	KDELC2	4.34	6.53e-05	0.853
APPFVAR	Q9Y2S7;B4DEM9	Q9Y2S7	POLDIP2	3.37	6.53e-05	0.853
GQLEALQVDGGR	CON__P08729;CON__Q3KNV1;P08729	CON__Q3KNV1	KRT7	6.14	6.54e-05	0.853
YEELQVTVGR	CON__P35908;CON__P35908v2;P35908	CON__P35908v2	KRT2	3.34	6.58e-05	0.853
FTVETR	P21333;Q60FE5;Q14315	P21333	FLNA;FLNC	5.86	6.59e-05	0.854
AEFEQIVLGK	Q16831	Q16831	UPP1	4.43	6.63e-05	0.854
VAVLDGK	Q6UXN9	Q6UXN9	WDR82	4.72	6.63e-05	0.854
DGAGDVAFIR	E7EQB2;E7ER44;P02788	E7EQB2	LTF	5.58	6.66e-05	0.854
DRIPVYSAFR	O94919	O94919	ENDOD1	4.12	6.67e-05	0.854
DFTLELK	Q96PP9;Q8N8V2;A0A3B3IRS3	Q96PP9	GBP4;GBP7	3.35	6.67e-05	0.854
TPLGGIHISQTK	Q9P265	Q9P265	DIP2B	2.98	6.68e-05	0.854
DGFVQDEGTMFPVGK	P10643	P10643	C7	4.76	6.69e-05	0.854
LKEEIEVMAK	O75844;A0A6Q8PHG9	O75844	ZMPSTE24	4.57	6.69e-05	0.854
GATLALTQVTPQDER	P43121	P43121	MCAM	4.74	6.78e-05	0.855
NPFVLGANLNGGER	Q8IUX7	Q8IUX7	AEBP1	3.8	6.82e-05	0.855
ELPGFVNYR	A0A7P0T9R0;A0A7P0Z4E0;P20591;A0A7P0T9I6;F8W8T1	P20591	MX1	4.19	6.82e-05	0.855
EVQVFEITENSAK	P12111	P12111	COL6A3	6.74	6.85e-05	0.855
AALTTLFK	Q96KP4;J3QKT2;J3QRA8;J3KSV5;A0A087WYZ1;J3QR27;J3QLU1;J3QKQ0;J3QRD0;J3QQN6;J3QL02;J3KSS4;J3QRP4	Q96KP4	CNDP2	6.42	6.87e-05	0.855
SDLETQISSLNEK	Q9BZF9;H0YNH8;F5H2B9	Q9BZF9	UACA	3.66	6.87e-05	0.855
FNVSYLK	Q05315	Q05315	CLC	5.72	6.88e-05	0.855
VVTAGSAILQK	Q69YN4	Q69YN4	KIAA1429	2.92	6.88e-05	0.855
ALEAANGELEVK	CON__P08727;P08727	CON__P08727	KRT19	7.25	6.88e-05	0.855
LPKPSRDELFTDDK	P23786;A0A1B0GVF3;A0A1B0GTB8;A0A1B0GWC0;A0A1B0GV75	P23786	CPT2	4.01	6.89e-05	0.855
LNIDTR	P61160	P61160	ACTR2	6.01	6.91e-05	0.855
ANIQAVSLK	M0R1T5;O43633;M0R1L7	M0R1T5	CHMP2A	4.8	6.91e-05	0.855
NEIQDLQTK	P32455	P32455	GBP1	5.48	6.91e-05	0.855
GALVLGSSLK	P46976;C9JQ42;G5E9W8	P46976	GYG1	5.56	6.91e-05	0.855
FETLQAQAGK	CON__P08729;CON__Q3KNV1;P08729;CON__Q9DCV7	CON__Q3KNV1	KRT7	5.78	6.94e-05	0.855
NQADCIPFFR	P05164	P05164	MPO	3.62	6.94e-05	0.855
GIQSLGVK	Q9UKK3	Q9UKK3	PARP4	3.58	6.95e-05	0.855
YAPISGGDHAEVDVPK	F5H7V9;J3QSU6;P24821;E9PC84	P24821	TNC	4.03	6.96e-05	0.856
GQHFYAVER	Q15654;H7BZE2	Q15654	TRIP6	4.13	6.96e-05	0.856
IVASNLVTGLPK	Q8WWZ8	Q8WWZ8	OIT3	4.11	6.98e-05	0.856
LVGTPGAELLK	Q16539;B4E0K5	Q16539	MAPK14	4.33	6.99e-05	0.856
SLSGELR	Q8IX12	Q8IX12	CCAR1	3.84	7.02e-05	0.856
LGGNYGPTVLVQQEALKR	O15382;M0QXF9;B3KSI3;M0QZ10;M0QZP4	O15382	BCAT2	3.63	7.03e-05	0.856
EIKQEAAVELSQLR	P0C7P4	P0C7P4	UQCRFS1P1	3.73	7.04e-05	0.856
AQAEQQHNPAANPTMIR	A5YKK6;H3BMZ2	A5YKK6	CNOT1	3.42	7.05e-05	0.856
GALDAFSAVQDPHSR	P19878	P19878	NCF2	4.33	7.05e-05	0.856
DFIISRPTK	Q9Y6K5;A0A7P0T9W6;A0A7P0T9J0;A0A7P0Z4D0;A0A7P0T8S7;A0A7P0TAU8;A0A7P0Z4F1;A0A7P0TAC0	Q9Y6K5	OAS3	3.81	7.05e-05	0.856
ALTEELHQK	A0A0A0MTR7;A0A0A0MTC1;Q63HN8	A0A0A0MTR7	RNF213	3.52	7.06e-05	0.856
MVTVEFADEVR	H0YJ34;A0A0U1RRM8;Q96AC1	Q96AC1	FERMT2	4.99	7.09e-05	0.856
AGNSQGDFYIR	O95967;E9PRU1;H0YEU0;H0YET5;H0YCR9;E9PI47	O95967	EFEMP2	4.52	7.1e-05	0.856
YPVVSDGK	Q02809;Q5JXB7;Q5JXB8	Q02809	PLOD1	3.2	7.1e-05	0.856
AELDGTILK	Q8WXF1;X6RDA4	Q8WXF1	PSPC1	4.03	7.12e-05	0.856
EAQQYSEALASTR	Q9H4G4;Q5VZR0	Q9H4G4	GLIPR2	4.07	7.15e-05	0.857
FVMEVEVDGQK	Q12906;Q96SI9	Q12906	ILF3;STRBP	3.34	7.15e-05	0.857
SSQVAIEALSAMPTVR	Q03518;A0A140T9T7	Q03518	TAP1	4.44	7.18e-05	0.857
NLGQPIK	P34932	P34932	HSPA4	3.61	7.2e-05	0.857
LLPGNATISK	Q460N5;H7C5R8	Q460N5	PARP14	3.55	7.23e-05	0.857
QPMILEK	P49411	P49411	TUFM	4.05	7.23e-05	0.857
ISNFLLEK	Q12965;H0YLJ4;O00160	Q12965	MYO1E;MYO1F	4.81	7.28e-05	0.857
KVEQTIQYNSELEQK	Q8IWJ2;A0A8I5KW38;A0A8I5KVA2;A0A8I5QJB7;B8ZZW2	Q8IWJ2	GCC2	3.17	7.29e-05	0.857
NIEMVEGGEGK	Q2TB90	Q2TB90	HKDC1	4.04	7.29e-05	0.857
AIEQADLLQEEAETPR	P56377	P56377	AP1S2	3.53	7.3e-05	0.857
SGSPAVLAFAK	Q8TEM1	Q8TEM1	NUP210	3.54	7.3e-05	0.857
ALTTKPSSLDQFK	Q92556	Q92556	ELMO1	4.44	7.33e-05	0.857
GFIESIRPALELSK	E7EQW0;B7ZLE8;A0A0G2JS53;Q13075;A0A0G2JNC7;A0A0G2JQE0	E7EQW0	NAIP	3.29	7.33e-05	0.857
AVMNFVVR	O60568;H7C2S8	O60568	PLOD3	5.23	7.33e-05	0.857
GELQSSDLFHHSK	Q02809	Q02809	PLOD1	3.93	7.34e-05	0.857
LNLNNTVLSK	P07814;V9GYZ6	P07814	EPRS	5.43	7.36e-05	0.858
QFGVAPFTIAR	P12111	P12111	COL6A3	7.63	7.37e-05	0.858
LIASVAGSVER	A3KFL2;A0A8I5KVY3;B4E001;A0A8I5KV47;A0A8I5QL34;A0A8I5KRS5;A0A8I5KYK9;Q13868;A3KFL5	Q13868	EXOSC2	4.05	7.38e-05	0.858
VQQVQPAMQAVIR	Q96TA1	Q96TA1	FAM129B	5.24	7.39e-05	0.858
GADKIEGAIDIR	P19174	P19174	PLCG1	3.01	7.39e-05	0.858
SLPFFSAR	Q9Y5R8	Q9Y5R8	TRAPPC1	3.22	7.4e-05	0.858
LTVTSQNLQLENLR	P04233;E7EQJ3;H0YBZ8	P04233	CD74	4.35	7.41e-05	0.858
TLMNAVSPLK	Q12768;E7EQI7	Q12768	KIAA0196	3.06	7.41e-05	0.858
VNFAMNVGK	A0A804F6T5;A0A804F729;P14618;B4DNK4	P14618	PKM	5.97	7.43e-05	0.858
ELGAQLHQLVLNSAR	Q15027	Q15027	ACAP1	3.44	7.44e-05	0.858
ATLIEANR	K7EK60;O95466;K7EJE6	O95466	FMNL1	3.68	7.49e-05	0.858
SILFSNR	Q99614;A0A804HKC5;A0A804HIB8;A0A804HKI4;A0A804HHT7	Q99614	TTC1	3.82	7.49e-05	0.858
TITMLDEQKEQLNR	O00161;H3BM38;H3BNE1;H3BR18;H3BPJ0;H3BR99	O00161	SNAP23	4.09	7.51e-05	0.858
SSTSPNLQK	O75351;K7EL71;K7EKZ3	O75351	VPS4B	3.34	7.51e-05	0.858
KLPFPDETHER	O43292;E9PLV6;E9PPZ9;E9PLG8	O43292	GPAA1	3.79	7.53e-05	0.858
GVTIASGGVLPR	A0A7I2V423;A0A7I2YQR8;A0A7I2V6E9;A0A7I2V2N7;A0A7I2V522;A0A7I2V3Z8;A0A7I2V3M7;A0A7I2V3R0;Q9P0M6;A0A7I2V412;A0A7I2YQD6	Q9P0M6	H2AFY2	5.35	7.55e-05	0.858
EVTIPDLEPSRK	A0A140TA33;A0A140T902;A0A140TA41;A0A140T9C0;P22105;A0A140TA52;A0A140T8Y3;A0A140T8Z8;A0A140T956;A0A3B3ISX9	A0A3B3ISX9	TNXB	4.2	7.55e-05	0.858
PSVYIPEFIAANQSAR	Q9NPH2	Q9NPH2	ISYNA1	3.79	7.56e-05	0.858
TELLPGDRDNLAIQTR	Q16270	Q16270	IGFBP7	4.23	7.57e-05	0.859
LGPSVVGLAR	Q14690;A0A3B3IUD7	Q14690	PDCD11	3.47	7.58e-05	0.859
ATAIDIATSK	A0A6I8PIW1;O43301;A0A6I8PLB1;A0A1B0GTF3;A0A6I8PIT5;A0A6I8PL32	A0A6I8PIW1	HSPA12A	3.6	7.59e-05	0.859
AVVMLEYVER	Q13617;A0A0A0MTN0;A0A8I5QJI3;A0A8I5KQQ5;A0A8I5KYP8;A0A8I5KU22;Q5T2B5;A0A0D9SET6;A0A8I5KUA9;A0A8I5KVR3;A0A8I5KYZ8;A0A8I5KXB2;A0A8I5KS98;A0A8I5KPX0;A0A8I5KTY5;A0A8I5KVE2;A0A8I5KWB8;A0A8I5KV54;A0A8I5KYM7;A0A8I5KTY2;A0A8I5KSW7;Q5T2B7;A0A8I5KR51;A0A8I5KYA3;A0A8I5KUA0;A0A8I5QKN3	Q13617	CUL2	3.59	7.6e-05	0.859
KDVSGPMPDSYSPR	P26640;A0A140T936;A0A140T954	P26640	VARS	3.44	7.6e-05	0.859
QATINIGTIGHVAHGK	P41091;H7BZU1;Q2VIR3	P41091	EIF2S3;EIF2S3L	3.89	7.62e-05	0.859
DSSMEEGVSAVAHR	Q13488;H0YEL3	Q13488	TCIRG1	4.34	7.62e-05	0.859
TTCHDFLECQNSPAR	P98095	P98095	FBLN2	4.09	7.65e-05	0.859
EPPAYTFR	Q32P28;Q8IVL5	Q32P28	LEPRE1;LEPREL1	3.53	7.65e-05	0.859
AQIHEQNPSVEVVYYNK	Q9BWM7	Q9BWM7	SFXN3	4.69	7.65e-05	0.859
LGLQYMELIPK	Q9NZU5;H7C3D2;C9IYS1	Q9NZU5	LMCD1	4.07	7.66e-05	0.859
ELQQALEGQLR	Q9H4E7	Q9H4E7	DEF6	3.04	7.68e-05	0.859
ITDNELELYK	P55011;G3XAL9	P55011	SLC12A2	4.11	7.73e-05	0.859
INHADFATVQLR	A0A087WYF1;P24043;A0A087WX80;A0A8I5KQG5	A0A087WYF1	LAMA2	3.59	7.75e-05	0.859
AMENLFINR	P09917	P09917	ALOX5	3.64	7.77e-05	0.859
GPIGSIGPK	P12111	P12111	COL6A3	6.69	7.77e-05	0.859
SQQQQLVESLHK	Q7Z3B4	Q7Z3B4	NUP54	4.45	7.78e-05	0.859
MEPAASSQAAVEELR	Q96B97;Q5JPT2	Q96B97	SH3KBP1	3.86	7.79e-05	0.86
FEVAQVESLR	P12270	P12270	TPR	4.66	7.8e-05	0.86
EEIQSSISGVTAAYNR	P46940;A0A0J9YXZ5;H0YLE8;A0A087WWP1	P46940	IQGAP1	4.35	7.81e-05	0.86
GCAADDIMDPTSLAETQEDHNGGQK	A0A494C0X7;P05107;D3DSM0;J3KNI6;E7EVZ9;E5RK25;E5RIG7;E5RHE6;E5RK54	A0A494C0X7	ITGB2	4.24	7.81e-05	0.86
QLDTETNLHLNTK	P12270	P12270	TPR	4.02	7.81e-05	0.86
GDIGETGVPGAEGPR	Q15848	Q15848	ADIPOQ	3.18	7.83e-05	0.86
VEEAIVAR	Q15050	Q15050	RRS1	3.1	7.86e-05	0.86
GVPLYR	P06733;A0A2R8Y6G6;K7EM90;A0A2R8YEM5;E5RG95;E5RI09;P13929;E5RGZ4;K7EPM1;K7EKN2	P06733	ENO1;ENO3	5.96	7.9e-05	0.86
ESVSHAILQTDQALTETEK	Q96PP8	Q96PP8	GBP5	3.2	7.9e-05	0.86
LYLLAAPAAER	E5RJ11;G3V114;O60496	O60496	DOK2	3.03	7.98e-05	0.86
ETLLDAIK	Q05707	Q05707	COL14A1	6	7.99e-05	0.86
KNTIYEIQDNTGSMDVVGSGK	P41218;H0Y6P3	P41218	MNDA	3.75	7.99e-05	0.86
VTIDSSYDIAK	P36222;H0Y3U8	P36222	CHI3L1	3.01	8e-05	0.861
LLIYDNNKRPSGLPDR	sp|A003797|abysis_3797	sp|A003797|abysis_3797		5.1	8.02e-05	0.861
SFVIATTR	Q9P253	Q9P253	VPS18	3.29	8.02e-05	0.861
VAPEEHPVLLTEAPLNPK	A0A2R8Y793;G5E9R0;A0A6Q8PH58;I3L4N8;K7EM38;P60709;E7EVS6;A0A2R8YGF8;P63261;A0A804GS07;I3L3I0;I3L1U9;I3L3R2;J3KT65;A0A6Q8PFE4	P60709	ACTB;ACTG1	4.33	8.03e-05	0.861
LMNDMTAVALNYGIYK	Q92598	Q92598	HSPH1	3.25	8.04e-05	0.861
GIDSDASYPYK	P25774;A0A7P0TAQ0;A0A7P0T904;A0A7P0T844;A0A7P0T8U1;U3KQE7;A0A7P0T8H4;A0A7P0T8A1;A0A7P0T7Z6;A0A7P0TB77	P25774	CTSS	3.16	8.05e-05	0.861
NLGFSPEDREENVR	O43252	O43252	PAPSS1	3.43	8.08e-05	0.861
AAADGGGPGGASVGTEEDGGGVGHR	A0A8I5KRS9;A6NHR9	A0A8I5KRS9	SMCHD1	3.69	8.17e-05	0.861
EPQVYTLPPSREEMTK	sp|A008221|abysis_8221;sp|A008481|abysis_8481;sp|A024250|abysis_24250;sp|A008918|abysis_8918;sp|A008482|abysis_8482;sp|A024229|abysis_24229;sp|A008521|abysis_8521;sp|A008700|abysis_8700;sp|A024328|abysis_24328;sp|A008148|abysis_8148;sp|A008054|abysis_8054;sp|A024251|abysis_24251;sp|A024307|abysis_24307;sp|A072122|abysis_72122;sp|A024337|abysis_24337;sp|A057736|abysis_57736;sp|A008322|abysis_8322;…	sp|A008469|abysis_8469	IGHG3;IGHG2	4.85	8.18e-05	0.861
SNAPNIPK	Q9NRP0	Q9NRP0	OSTC	4	8.18e-05	0.861
MPSGEFAR	P12004	P12004	PCNA	4.87	8.18e-05	0.861
GMIDLIAAVQK	P23469	P23469	PTPRE	2.99	8.19e-05	0.861
MNPEYDYLFK	Q9H0U4;E9PLD0	Q9H0U4	RAB1B	4.83	8.19e-05	0.861
EINTNQEALKR	Q93050;K7EN36;K7EPG4;K7EM24	Q93050	ATP6V0A1	3.79	8.2e-05	0.861
AEPASVAAESLAGSR	Q9NQT5	Q9NQT5	EXOSC3	3.42	8.21e-05	0.861
DLQSNVEHLTEK	Q01813;A0A7I2V3Z0;B1APP6	Q01813	PFKP	4.31	8.25e-05	0.862
GLEGTIR	Q9BZQ8	Q9BZQ8	FAM129A	3.76	8.27e-05	0.862
AIRPQIDLK	P78527	P78527	PRKDC	4.79	8.27e-05	0.862
LAAGASVLK	Q6ZT62;A0A2R8Y5V0;Q9Y3L3	Q6ZT62	SH3BP1	3.76	8.28e-05	0.862
AAEDYGVIK	Q01995;H0YCU9	Q01995	TAGLN	5.48	8.28e-05	0.862
AEILSLESR	Q8ND24;E9PN76	Q8ND24	RNF214	3.49	8.29e-05	0.862
VQVALGNISSK	O75935;X6RCK5;X6RA56;A0A0A0MRV8;X6RLR1	O75935	DCTN3	4.23	8.3e-05	0.862
DVEVTKEEFAQSAIR	O75746	O75746	SLC25A12	3.26	8.31e-05	0.862
VLSGLGGAAASSHR	Q9P2D3	Q9P2D3	HEATR5B	3.09	8.33e-05	0.862
VLNQQLTNHIR	A0A0D9SFB1;A0A1B0GU67;A0A0U1RQP1;Q05193;A0A0D9SFE4;E5RHK8;H0YBC6;Q9UQ16;A0A8I5KXV5;E5RIK2	A0A0U1RQP1	DNM1;DNM3	3.55	8.34e-05	0.862
LQIFSVEGQK	A0A8I5KRS9;A6NHR9;J3KTL8	A0A8I5KRS9	SMCHD1	3.56	8.34e-05	0.862
DALNIETAIK	H0YMT9;H0YMD9;H0YKN4;P07355;H0YMW4;H0YN42;H0YMU9;H0YMD0;A6NMY6;H0YNB8;H0YKS4;A0A7I2V4P4;H0YMM1;H0YKX9;H0YLV6;H0YKZ7;H0YKL9;H0YKV8	P07355	ANXA2;ANXA2P2	3.87	8.36e-05	0.862
VTILEADNR	Q96RQ9;M0QYW8	Q96RQ9	IL4I1	3.98	8.39e-05	0.862
LAVLGQPK	sp|A009640|abysis_9640;sp|A009632|abysis_9632;sp|A079866|abysis_79866;sp|A036887|abysis_36887;sp|A018429|abysis_18429;sp|A014666|abysis_14666	sp|A009640|abysis_9640		3.72	8.44e-05	0.862
AALEDTLAETEAR	CON__P08727;P08727;K7EMS3	CON__P08727	KRT19	7.29	8.44e-05	0.862
IISGIHMQTSESTK	P16284;A0A075B727	P16284	PECAM1	4.2	8.46e-05	0.862
MAFGATLDVK	A0A2R8YFH5;Q15437	A0A2R8YFH5	SEC23B	4.25	8.47e-05	0.862
LPLEGNTMR	P14543	P14543	NID1	4.68	8.5e-05	0.863
NVIFQPVAELK	Q01813;A0A7I2V3Z0;B1APP6;H0Y757	Q01813	PFKP	4.29	8.56e-05	0.863
EKLQEEMLQREEAENTLQSFR	P08670;B0YJC4	P08670	VIM	6.6	8.56e-05	0.863
LQEPSAQANCCDSEKNGDIGQQIK	Q9BXX0	Q9BXX0	EMILIN2	3.22	8.58e-05	0.863
TFNTSTGGLLLPSDTKR	P12956;B1AHC9	P12956	XRCC6	5.22	8.6e-05	0.863
SQNIVTDSSSLSAEAIR	A0A087WUZ3;Q01082	Q01082	SPTBN1	3.06	8.63e-05	0.863
YVLGMQELFR	Q96J01;D6RGZ2	Q96J01	THOC3	2.75	8.66e-05	0.863
VSPESNEDISTTVVYR	B8ZZA8;B8ZZC5	B8ZZA8	GLS	3.62	8.69e-05	0.863
SPFEVYVDK	P21333;A0A7P0NMY4;A0A087WWY3;A0A7I2V3E6;Q60FE5;F8WE98	P21333	FLNA	3.57	8.72e-05	0.863
TLQALQIPAAK	P46940;A0A0J9YXZ5	P46940	IQGAP1	4.97	8.72e-05	0.863
ELAAQTIK	P19827	P19827	ITIH1	4.3	8.81e-05	0.864
AAISLVPEVPK	Q7Z3J2;E7EWW0;F5H7K1;H3BV68	Q7Z3J2	C16orf62	3.27	8.86e-05	0.864
KGKEDEGEEAASPMLQIQR	Q14204;A0A2R8Y706;A0A7P0T9C4;A0A7P0TA13;A0A2R8Y5T0;A0A7P0T9R4;A0A7P0TAW9;A0A7P0T7V5;A0A7P0T916;A0A7P0T8N2;A0A7P0TBJ7;A0A7P0TAF3;A0A7P0TB75;A0A2R8Y6H2;A0A7P0T9K2;A0A7P0T9F1;A0A7P0T8W5;A0A2R8YFZ7;A0A7P0TAM4;A0A7P0T825;A0A7P0TB64;A0A7P0TAV5;A0A7P0T990;A0A804HHY6;A0A2R8YGC7;A0A7P0T942	Q14204	DYNC1H1	3.57	8.87e-05	0.864
VLQIFNK	P49137	P49137	MAPKAPK2	3.47	8.88e-05	0.864
LLIYNNNQRPSGVPDR	sp|A008752|abysis_8752;sp|A084172|abysis_84172;sp|A044615|abysis_44615;sp|A083992|abysis_83992;sp|A034988|abysis_34988;sp|A083135|abysis_83135;sp|A004280|abysis_4280;sp|A006193|abysis_6193	sp|A008752|abysis_8752		4.54	8.89e-05	0.864
SSPPVQFSLLHSK	O95782	O95782	AP2A1	4.45	8.9e-05	0.864
AMTLMEYLIK	Q9Y6I3	Q9Y6I3	EPN1	4.33	8.91e-05	0.864
LFAVNQK	A0A087WYF1;P24043;A0A087WX80	A0A087WYF1	LAMA2	3.25	8.93e-05	0.864
KLPIQEFHLSR	P39748;I3L3E9	P39748	FEN1	4.23	8.94e-05	0.864
IKVAEDEAEAAAAAK	F5GZS6;A0A7P0Z4A0;A0A7P0TAN7;J3KPF3;A0A7P0Z4P5;P08195;A0A7P0T9F7;A0A7P0TAT7;A0A7P0TBF8	F5GZS6	SLC3A2	3.27	8.96e-05	0.864
VDLVDFEGNHQFAK	O00602	O00602	FCN1	4.1	8.99e-05	0.864
LALIQPSR	C9JBI3;P78330	C9JBI3	PSPH	4.2	8.99e-05	0.864
LATEFELR	A5YKK6	A5YKK6	CNOT1	3.26	9.01e-05	0.865
MLPTFVR	P52790;P19367;B1AR62;Q2TB90;E9PB90;P52789	Q2TB90	HK3;HK1;HKDC1;HK2	4.75	9.01e-05	0.865
VSIPVDATESEPK	Q8WUF8;E9PBM2	Q8WUF8	FAM172A	3.28	9.02e-05	0.865
AAIEHELPTATQK	Q6ZMI0	Q6ZMI0	PPP1R21	3.44	9.04e-05	0.865
VFDPVPVGVTK	Q08211	Q08211	DHX9	4.38	9.09e-05	0.865
ASNLLYGQLK	A0A7P0TAQ9;Q8IXB1;A0A7P0Z431;A0A7P0TB97	A0A7P0TAQ9	DNAJC10	3.54	9.1e-05	0.865
VGNIEIKDLMVGDEASELR	P61160	P61160	ACTR2	3.72	9.12e-05	0.865
IVSVLPR	Q567U6;F8W9X7	Q567U6	CCDC93	3.42	9.12e-05	0.865
FDSDVGEYR	D7RIG5;A0A140T958;P79483;A0A182DWH4;A2BFX2;A0A5S8K7D1;Q30154	A2BFX2	HLA-DRB1;HLA-DRB3;HLA-DRB5	5.83	9.14e-05	0.865
SGEDEQQEQTIAEDLVVTK	Q9UQ80;F8VR77	Q9UQ80	PA2G4	4.15	9.14e-05	0.865
TPEYLHIDQR	O00178;B0QY59	O00178	GTPBP1	4.04	9.15e-05	0.865
AGGIETIANEFSDR	Q92598;R4GN69	Q92598	HSPH1	4.78	9.16e-05	0.865
RSELEEQQMHLNVGLR	Q14204;A0A2R8Y706;A0A7P0T9C4;A0A7P0TA13;A0A2R8Y5T0;A0A7P0T9R4;A0A7P0TAW9;A0A7P0T7V5;A0A7P0T916;A0A7P0T8N2;A0A7P0TBJ7;A0A7P0TAF3;A0A7P0TB75;A0A2R8Y6H2;A0A7P0T9K2;A0A7P0T9F1;A0A7P0T8W5;A0A2R8YFZ7;A0A7P0TAM4;A0A7P0T825	Q14204	DYNC1H1	4.42	9.18e-05	0.865
VLMVETHNEIYDK	A0A499FJK2;P01137;A0A7I2YQL8;A0A7I2V5Z9	A0A499FJK2	TGFB1	3.28	9.18e-05	0.865
GAILTTMLATR	D6R938;Q13557;H0Y9J2;H0Y9C2;E9PBG7;E9PF82;A0A5F9ZHM9;A0A5F9ZH21;Q9UQM7;A0A5K1VW76;A0A804HIC9;A0A5F9ZHR5;D6RFJ0;A0A5F9ZHY2;A0A5F9ZH50;Q13554;H7BZC6	D6R938	CAMK2D;CAMK2A;CAMK2B	4.14	9.21e-05	0.865
ISADTHQFSVTER	Q96RQ1;H0YI50;H0YI58	Q96RQ1	ERGIC2	3.94	9.23e-05	0.865
AYLTLVR	P27216	P27216	ANXA13	5.47	9.26e-05	0.865
SILLSGTVLPSAQR	O00182;J3QS92;J3KSA0	O00182	LGALS9	5.25	9.26e-05	0.865
SALENMLSETQSR	CON__Q9C075;Q9C075	CON__Q9C075	KRT23	4.54	9.27e-05	0.865
GATDIDKNGYPDLIVGAFGVDR	P06756	P06756	ITGAV	3.09	9.28e-05	0.866
GFFLVQTK	O75695	O75695	RP2	3.98	9.28e-05	0.866
TSYQVYSK	F5GZZ9;C9JHR8;Q86VB7	Q86VB7	CD163	4.04	9.29e-05	0.866
NGCGGEIESPASSFHVLR	P18084	P18084	ITGB5	3.59	9.3e-05	0.866
EALIAASETLK	Q9NTJ3;E9PD53	Q9NTJ3	SMC4	3.4	9.32e-05	0.866
DAADQNFDYMFK	O95716	O95716	RAB3D	3.02	9.34e-05	0.866
KTHIQDNHDGTYTVAYVPDVTGR	P21333;Q60FE5	P21333	FLNA	5.77	9.35e-05	0.866
GGSFQLNELQGLK	E7EQB2;E7ER44;P02788;C9JCF5	E7EQB2	LTF	5.78	9.35e-05	0.866
EDFDSLLQSAK	F5GZS6;A0A7P0Z4A0;A0A7P0TAN7;J3KPF3;A0A7P0Z4P5;P08195;A0A7P0T9F7;F5GZI0;F5H056;A0A7P0TAT7;A0A7P0TBF8	F5GZS6	SLC3A2	3.43	9.42e-05	0.866
KLEVLQSQK	P29350	P29350	PTPN6	4.27	9.43e-05	0.866
NKYEDEINHR	CON__Q3KNV1;P08729	CON__Q3KNV1	KRT7	4.52	9.44e-05	0.866
GKSDENEDPSVVGEFK	Q9NZM1;H0YD14	Q9NZM1	MYOF	3.72	9.46e-05	0.866
LKDDEVAQLK	A0A5F9ZHM4;P07195	A0A5F9ZHM4	LDHB	4.73	9.62e-05	0.867
EMNPPDNIK	Q14116	Q14116	IL18	3.26	9.63e-05	0.867
QSVFPFESGKPFK	P17931;G3V3R6	P17931	LGALS3	6.27	9.63e-05	0.867
DGRPQVVPVEGPER	A0A140TA33;A0A140T902;A0A140TA41;A0A140T9C0;P22105;A0A140TA52;A0A140T8Y3;A0A140T8Z8;A0A140T956;A0A140T923;A0A3B3ISX9;A0A087WWA5	A0A3B3ISX9	TNXB	3.7	9.64e-05	0.867
IMADSGPIYDK	P07996;CON__Q28194	P07996	THBS1	4.29	9.65e-05	0.867
HPFFLDDR	Q13510;A0A1B0GTZ5;A0A1B0GTM3;A0A1B0GUA4;A0A1B0GW68;E7EMM4;A0A1B0GUH5;A0A1B0GTP7;A0A1B0GUW4;A0A1B0GUG1;A0A1B0GUE3;A0A1B0GV06	Q13510	ASAH1	4.2	9.67e-05	0.867
NLAITLR	K7EK60;O95466;K7EJE6;Q8IVF7;F8W1F5;Q96PY5;C9IZY8	O95466	FMNL1;FMNL3;FMNL2	3.84	9.67e-05	0.867
AISAANLHLR	Q6P2Q9	Q6P2Q9	PRPF8	4.02	9.69e-05	0.867
AIGGGLSSVGGGSSTIK	CON__P02538;P02538	CON__P02538	KRT6A	4.59	9.72e-05	0.867
AGFFGDAMK	P98160	P98160	HSPG2	4.86	9.73e-05	0.867
LQTSSVLVSGLR	P22314;Q5JRR9;Q5JRS0;Q5JRS1;Q5JRS3;Q5JRS2	P22314	UBA1	6.17	9.74e-05	0.867
YLPELMAEK	Q07666;A0A6Q8PGH5;Q5VWX1;O75525	Q07666	KHDRBS1;KHDRBS2;KHDRBS3	4	9.75e-05	0.867
GMFTAEDLR	Q16864	Q16864	ATP6V1F	4.63	9.76e-05	0.867
RREDNLNDSSQQLQDSLR	X6RLX0;Q8IUD2;G8JLD3;K7EPD6	X6RLX0	ERC1	3.73	9.76e-05	0.867
AASADSTTEGTPADGFTVLSTK	A0A8I5KS04;O75367;A0A8I5KRC6	O75367	H2AFY	4.45	9.78e-05	0.867
QTHQPPAPNSLIR	P02747	P02747	C1QC	6.12	9.82e-05	0.867
LEQEIATYR	P02533;CON__P02533;CON__Q04695;Q04695;A0A3B3IS58;CON__A2A4G1;CON__P08779;P08779;CON__Q9Z2K1;CON__Q3ZAW8;CON__P08727;P08727;K7ERE3;CON__ENSEMBL:ENSP00000377550;P13646;CON__P08730-1;CON__P13646-1;CON__P19001;CON__Q6IFX2;CON__P19012;P19012;A8MT21;CON__Q8N1A0;Q8N1A0;CON__Q61782	P02533	KRT14;KRT17;KRT16;KRT19;KRT13;KRT15;KRT222	3.99	9.83e-05	0.867
VAVGNQPADIGYK	A0A7P0T9R0;A0A7P0Z4E0;H9KVC9;P20591;A0A7P0T9I6;F8W8T1;H9KVC7	P20591	MX1	3.76	9.83e-05	0.867
KDHPFGFVAVPTK	P63279;H3BQQ9;B0QYN7;H3BPC4	P63279	UBE2I	5.75	9.84e-05	0.867
IIEPLTSR	P35249;C9JZI1;C9J8M3	P35249	RFC4	2.93	9.85e-05	0.867
GENLVSMTVEGPPPK	P14678;J3QLE5;P63162	P14678	SNRPB;SNRPN	3.76	9.93e-05	0.868
AALGEPVR	Q9NUP9;G3V1D4	Q9NUP9	LIN7C	3.34	9.94e-05	0.868
SLPVEEQPK	Q6P2Q9	Q6P2Q9	PRPF8	4.03	9.95e-05	0.868
QSEPLEITLLAPER	F5H7V9;J3QSU6;H0YGZ3;P24821	P24821	TNC	3.36	9.95e-05	0.868
VMILITDGK	D6RGG3;Q99715	D6RGG3	COL12A1	3.37	9.98e-05	0.868
AIVESIR	Q96RW7	Q96RW7	HMCN1	3.51	0.000100149	0.868
LLIYTNNQRPSGVPDR	sp|A043262|abysis_43262;sp|A023180|abysis_23180;sp|A021759|abysis_21759;sp|A069913|abysis_69913	sp|A043262|abysis_43262		4.07	0.000100256	0.868
EESPLLIGQQSTVSDVPR	H0Y7Z1;P02751	P02751	FN1	4.4	0.000100266	0.868
LSLPPNVR	Q14204;A0A2R8Y706;A0A7P0T9C4;A0A7P0TA13;A0A2R8Y5T0;A0A7P0T9R4;A0A7P0TAW9;A0A7P0T7V5;A0A7P0T916;A0A7P0T8N2;A0A7P0TBJ7;A0A7P0TAF3;A0A7P0TB75;A0A2R8Y6H2;A0A7P0T9K2;A0A7P0T9F1;A0A7P0T8W5;A0A2R8YFZ7;A0A7P0TAM4;A0A7P0T825;A0A7P0TB64;A0A7P0TAV5;A0A7P0T990;A0A804HHY6;A0A2R8YGC7;A0A7P0T942	Q14204	DYNC1H1	3.27	0.000100636	0.868
GDFVSLALR	A0A494C0G5;A0A494C1I6;O00468;A0A087X208	O00468	AGRN	4.56	0.000100725	0.868
RQAQQERDELADEIANSSGK	P35579;A0A8I5KWT8	P35579	MYH9	5.54	0.000100799	0.868
GGVNDNFQGVLQNVR	P07996;CON__Q28194	P07996	THBS1	2.99	0.000101232	0.868
DHEVLFPK	P42331;H7C4P1;C9JB56	P42331	ARHGAP25	3.5	0.000101332	0.868
LGNPIVPLNIR	P78527	P78527	PRKDC	4.42	0.000101332	0.868
SMAEDTINAAVK	P43304	P43304	GPD2	4.27	0.00010169	0.869
DPHTEFTLK	D6RGG3;Q99715	D6RGG3	COL12A1	3.65	0.000101723	0.869
NVQILNMVTR	O14925	O14925	TIMM23	3.02	0.000101938	0.869
FLEHLSGAGK	Q01813	Q01813	PFKP	3.96	0.000101976	0.869
AVQELVHPVVDR	A5YKK6;H3BNB1	A5YKK6	CNOT1	4.09	0.000102094	0.869
IVNTPFQVLMNSEK	A0A0C4DFM1;Q92544	A0A0C4DFM1	TM9SF4	3.89	0.000102451	0.869
RPLNSVVLQQGLADR	Q9Y276;C9J8G3;C9J1S9	Q9Y276	BCS1L	3.13	0.000102721	0.869
AFNEFLER	Q03169;H0YLC0	Q03169	TNFAIP2	3.64	0.000102948	0.869
MVVESAYEVIK	A0A5F9ZHM4;P07195;A0A3B3IS95	A0A5F9ZHM4	LDHB	3.52	0.000103147	0.869
LSAFQR	P56470;M0QZ93;Q4VXA5	P56470	LGALS4;KHDC1	4.11	0.000103515	0.869
DYQELMNVK	CON__P35908;CON__P35908v2;P35908;Q5XKE5;CON__Q5XKE5;H0YID6;P12035;CON__P12035;Q01546;CON__Q01546	CON__P35908v2	KRT2;KRT79;KRT3;KRT76	4.06	0.000103545	0.869
VYTITPLLSDNR	P32121;Q68DZ5;K7EL17	P32121	ARRB2;DKFZp686L0365	3.48	0.000103892	0.869
QTLENERGELANEVK	P35579;A0A8I5KWT8	P35579	MYH9	3.76	0.000103978	0.869
DLINEAMDVK	Q13043;F5H5B4	Q13043	STK4	3.5	0.000103997	0.869
AVLLAVAVK	Q9BT73	Q9BT73	PSMG3	3.3	0.000104512	0.869
AVPPTYADLGK	C9JI87;P21796	P21796	VDAC1	5.65	0.000104547	0.869
RLLELGPKPEVAQQTR	A0A3B3ISC6;A0A3B3ITI7;P53621;A0A3B3IT15;A0A3B3IS84	P53621	COPA	5	0.000104886	0.87
SEPGTVPFDR	Q9Y6C2;A0A0A0MT20	Q9Y6C2	EMILIN1	5.34	0.000104949	0.87
GIYFADMVSK	P09874;A0A7I2V3E1	P09874	PARP1	4.22	0.000105082	0.87
VQAQGHTLQVAGLR	Q8IZ83;F5H4B6	Q8IZ83	ALDH16A1	4.66	0.000105349	0.87
ITDFIK	P62701	P62701	RPS4X	5.7	0.000105476	0.87
RFVQEVVQSQQVAVGR	M0QZR4;Q92888	M0QZR4	ARHGEF1	3.09	0.000105714	0.87
KFVADGIFK	P23396;E9PL09;E9PPU1;F2Z2S8;H0YCJ7;E9PQ96;E9PJH4;E9PK82;E9PQX2	P23396	RPS3	5.55	0.000105718	0.87
GNEVLSINGK	Q14005;A0A8C8KBU6;H0YLH9	Q14005	IL16	3.86	0.000105831	0.87
STEVEVLLPK	P50453	P50453	SERPINB9	4.36	0.000105981	0.87
AVNMEPDQYQMGSTK	O00160	O00160	MYO1F	3.56	0.000106762	0.87
VQTVHFTVR	Q4G0X4;E9PRT1;E9PJJ5	Q4G0X4	KCTD21	3.24	0.000107308	0.87
YAGPEDDAAITLAFSK	Q02880;E9PCY5	Q02880	TOP2B	3.31	0.000107362	0.87
VAEITGVVETAK	Q92541	Q92541	RTF1	4.56	0.000107509	0.87
SSLLAENQVLMER	Q86VS8	Q86VS8	HOOK3	3.79	0.000108016	0.87
LATNAAVTVLR	P50990;H7C2U0	P50990	CCT8	6.09	0.000108083	0.87
EADLDFAR	Q96A65	Q96A65	EXOC4	3.47	0.000108556	0.871
LDKLTVTSQNLQLENLR	P04233;E7EQJ3;H0YBZ8	P04233	CD74	5.12	0.000108643	0.871
GSIPEFFHIMK	Q9NRN7;E9PLW6;E9PNF3	Q9NRN7	AASDHPPT	3.62	0.000109071	0.871
TTVGMDGTLYK	Q2TB90	Q2TB90	HKDC1	4.09	0.000109141	0.871
YLSPDATVSTEVR	Q8IUX7	Q8IUX7	AEBP1	4.29	0.000109408	0.871
AALADDFDTPR	Q9HA77;H0YFF0;A0A087WWV1	Q9HA77	CARS2	3.96	0.000109573	0.871
ISLEIMTLQPR	Q14254	Q14254	FLOT2	3.81	0.000109744	0.871
LITEPAEIMA	P40123;E9PDI2;B7Z385	P40123	CAP2	2.9	0.000109883	0.871
KTTLQVDTLNAELAAER	A0A8I5KZ38;P35580	A0A8I5KZ38	MYH10	5	0.000109893	0.871
TIVMGASFR	P37837;F2Z393	P37837	TALDO1	6.43	0.000109894	0.871
SENKDIENLR	Q86UP2;G3V4Y7;B7Z6P3	Q86UP2	KTN1	4.06	0.000109974	0.871
ADLEEQLSDEEK	P47755;F8W9N7;C9JUG7;F8WED3	P47755	CAPZA2	4.02	0.000110334	0.871
SDPTSYAGYIEDLKK	P54709;C9JA36;C9JXZ1	P54709	ATP1B3	4.29	0.000110488	0.871
VKEESSSISSLKDEFTQR	P82094;A0A2R8Y7M0;F8WF45	P82094	TMF1	3.01	0.000110798	0.871
DIQTNVYIK	R4GMR5;P48556;K7EJR3;K7EJC1	R4GMR5	PSMD8	4.51	0.000110835	0.871
ATDAEADVASLNR	A0A0S2Z4G6;P09493;H0YKP3;A7XZE4;CON__Q3SX28;Q5TCU3;Q6ZN40	Q6ZN40	TPM1;TPM2b;TPM2	4.12	0.000111025	0.871
IGLINDMVR	Q14152	Q14152	EIF3A	4.6	0.000111152	0.871
VQGYFASFAK	A0A0A0MTR7;A0A0A0MTC1;Q63HN8	A0A0A0MTR7	RNF213	3.35	0.000111553	0.871
SVFPLSVSDSPAR	Q70J99	Q70J99	UNC13D	3.18	0.000111589	0.871
TAAENDFVTLK	CON__P35908;CON__P35908v2;P35908	CON__P35908v2	KRT2	5.46	0.000111747	0.872
NMLFSGTNIAAGK	P16615;H7C5W9	P16615	ATP2A2	3.8	0.000112033	0.872
GTVACGQPPVVENAK	P13611;E9PF17	P13611	VCAN	4.3	0.000112154	0.872
YTDQLKPFGDVPR	Q9Y625	Q9Y625	GPC6	3.34	0.00011248	0.872
ALAEIAK	P23246	P23246	SFPQ	5.77	0.000112545	0.872
REIGTLATVQR	Q9P2A4	Q9P2A4	ABI3	3.74	0.000112774	0.872
STPVNVPISQK	Q8WUM4	Q8WUM4	PDCD6IP	5.71	0.000113058	0.872
SDPYALVR	Q9BSJ8	Q9BSJ8	ESYT1	4.06	0.000113901	0.872
GSPNETELIESAK	A0A0A0MTR7;A0A0A0MTC1;Q63HN8	A0A0A0MTR7	RNF213	4.06	0.000113936	0.872
QASIELPSMAVASTK	E9PBD8;P33241;E7EMG9	P33241	LSP1	3.41	0.000114133	0.872
NATMPVTMLIR	Q9UKX7	Q9UKX7	NUP50	3.8	0.000114187	0.872
SDVVPMTAENFR	Q9UNP9;E9PKY5;E9PEQ6	Q9UNP9	PPIE	3.63	0.00011421	0.872
GIIIMGEDDDSHPSEMR	Q9GZP4	Q9GZP4	PITHD1	4.39	0.000114536	0.872
SASPFNLAEKPK	Q5VYK3;A0A804HJA4;J3KN16;R4GMY1	Q5VYK3	ECM29;KIAA0368	3.52	0.000114626	0.872
DNLFEIITSSR	A8K727;A0A087WZ32;Q9HB19;A0A087X038	A8K727	PLEKHA2	3.2	0.000114786	0.872
AASAPYFEVLEK	A0A804HL95;A0A804HJ08;Q9BSJ2;A0A804HJQ4;A0A804HJS9;A0A804HJH7;A0A804HI27;F2Z2B9;A0A804HK74	A0A804HL95	TUBGCP2	3.16	0.000114791	0.872
LTPLQLEIQR	G3V119;Q8N163;H0YB24	Q8N163	CCAR2	4.52	0.000114794	0.872
MENAELDVPIQSVFTR	P07996	P07996	THBS1	4.75	0.000115011	0.872
KALLTLADGR	D6RA82;P12429	P12429	ANXA3	3.19	0.000115141	0.872
GQLQELSTR	H3BQK9;H3BPE1;O94854;Q9UPN3	H3BQK9	MACF1;KIAA0754	3.37	0.000115149	0.872
KKGDFVLQNEEASAK	Q96PP9	Q96PP9	GBP4	3.07	0.000115468	0.873
ADKDSPNLAQLQQASR	O00291	O00291	HIP1	3.03	0.00011553	0.873
IQQQFSDLKR	O94906	O94906	PRPF6	2.84	0.00011583	0.873
AAAEVAGQFVIK	P02786;G3V0E5;H7C3V5	P02786	TFRC	4.09	0.000116165	0.873
SAGITLPADRR	Q9NY15	Q9NY15	STAB1	4.2	0.00011618	0.873
EANFTVSSMHGDMPQK	P38919;I3L3H2	P38919	EIF4A3	4.92	0.000116398	0.873
LSSEDILK	A6NIW2;Q5JSL3;A0A0J9YW64	A6NIW2	DOCK11	3.18	0.000116785	0.873
GGKPDEVVVDGTVSSTVLK	Q05707;J3QT83;Q4G0W3;H0YBB2	Q05707	COL14A1	6.43	0.000116789	0.873
VIHELANER	Q02880;E9PCY5	Q02880	TOP2B	3.88	0.000116817	0.873
VAAAGAFAQTLR	P22670	P22670	RFX1	2.85	0.000116852	0.873
VIGFSPEEVESVHR	B0I1T2;A0A3B3IU30	B0I1T2	MYO1G	3.35	0.000116985	0.873
SLFLGQK	A0A8I5KS04;O75367;A0A8I5KRC6	O75367	H2AFY	5.55	0.000117096	0.873
GTLVTVSSASTK	sp|A008445|abysis_8445;sp|A057735|abysis_57735;sp|A012591|abysis_12591;sp|A033190|abysis_33190;sp|A033401|abysis_33401;sp|A045060|abysis_45060;sp|A052271|abysis_52271;sp|A019121|abysis_19121;sp|A019119|abysis_19119;sp|A050148|abysis_50148;sp|A050062|abysis_50062;sp|A049943|abysis_49943;sp|A050147|abysis_50147;sp|A051909|abysis_51909;sp|A050254|abysis_50254;sp|A014133|abysis_14133;sp|A014303|abysi…	sp|A008469|abysis_8469		6.24	0.000117281	0.873
FASKPASEFVK	P20701;A0A7I2V4B0	P20701	ITGAL	3.95	0.000117485	0.873
SLLASLHTSR	Q5T4S7;A0A0A0MSW0;X6RE05	Q5T4S7	UBR4	3.5	0.000117599	0.873
LALASLGYEK	Q8WUM4;A0A3B3IT07	Q8WUM4	PDCD6IP	4.36	0.000117976	0.873
AGVSQVLNR	C9J2Y9;P30876;C9J4M6	C9J2Y9	POLR2B	3.6	0.000118024	0.873
ERNGLSLAALK	P16401	P16401	HIST1H1B	4.33	0.000118087	0.873
LEPGGGAEAQAVR	Q14315	Q14315	FLNC	4.41	0.000118396	0.873
IEISELNR	CON__P35908;CON__P35908v2;P35908;P04264;CON__P04264	CON__P35908v2	KRT2;KRT1	7.11	0.000118472	0.873
YSQYNALNVPLHNR	Q6ZMI0	Q6ZMI0	PPP1R21	3.58	0.00011856	0.873
GAVVVLNMVEASR	Q9H3U1;A0A1W2PNX8	Q9H3U1	UNC45A	3.22	0.000118982	0.873
IGTGSFGTVFR	P10398	P10398	ARAF	3.43	0.000119425	0.874
TASVFLLEK	Q96J01;D6RGZ2	Q96J01	THOC3	3.19	0.000119548	0.874
TEQMTLR	D6RBD0;D6R909;D6RGK8;D6RDI0;P63244;J3KPE3;D6RAC2;D6REE5;D6RHH4;D6RFZ9;E9PD14;D6RAU2;D6RHJ5	P63244	GNB2L1	5.84	0.000119602	0.874
VFNGSGKPIDR	P21281;H0YC04	P21281	ATP6V1B2	5.01	0.000119676	0.874
TDGGTTNYAAPVK	sp|A000407|abysis_407;sp|A056191|abysis_56191;sp|A060308|abysis_60308;sp|A009011|abysis_9011	sp|A000407|abysis_407		5.11	0.000120278	0.874
VAQPTITDNK	P21333;H0Y5F3;Q60FE5	P21333	FLNA	6.46	0.000120353	0.874
YLQEAFHVEPEEHQQTLQR	Q70J99;K7EQ37;K7EN81;K7EIH3	Q70J99	UNC13D	3.19	0.00012041	0.874
AIIEEGDKEIATK	O75165;A0A3B3IRM0	O75165	DNAJC13	4.09	0.000120503	0.874
LIVAPDADAR	Q8NEW0;H0Y362	Q8NEW0	SLC30A7	4.67	0.000120576	0.874
VAVMFNFPDPATVK	A0A494C1L5;P50851;E9PEM5;A0A494BZW2;H0YAC6	A0A494C1L5	LRBA	3.47	0.00012061	0.874
QLEDELVSLQK	A0A0S2Z4G6;P09493;H0YKP3;A0A087WTJ7	A0A0S2Z4G6	TPM1	4.49	0.000120796	0.874
LQQLEALRR	P51648;A0A5F9ZHN9;A0A5F9ZHI5;J3QRD1;A0A5K1VW72;A0A5F9ZHZ9;I3L0X1;J3KTG1;J3QKK9	P51648	ALDH3A2	4.27	0.000120869	0.874
ILADATAK	Q9Y490	Q9Y490	TLN1	5.52	0.000120918	0.874
EPAVGEPAEVTTTVLVR	P05362;K7EKL8	P05362	ICAM1	4.84	0.000121805	0.874
KDLQNFLK	P06702	P06702	S100A9	6.13	0.000121928	0.874
SQLLSGTLPK	Q92608;E5RFJ0	Q92608	DOCK2	3.34	0.000122432	0.874
SLSGLILK	O14787;A0A075B780;K7ESC1;K7ENW1;Q92973;A0A7P0TBF0;A0A7P0Z4D3;A0A7P0T9C0;A0A7P0T944;E7EW37	Q92973	TNPO2;TNPO1	4.94	0.000122698	0.874
SSIPITVR	P33992;B1AHB1	P33992	MCM5	3.33	0.00012283	0.874
VNETTEFLSK	Q9UKK3	Q9UKK3	PARP4	3.36	0.000122955	0.874
FNAVLTNPQGDYDTSTGK	P02747	P02747	C1QC	3.96	0.000123695	0.875
LTAAVLLAK	Q6PCE3	Q6PCE3	PGM2L1	3.47	0.00012374	0.875
AASTDMAGLEESFR	Q9BW30	Q9BW30	TPPP3	3.46	0.000123754	0.875
LYQTPLELK	P52948;A0A3B3ITD8;H7C3P6	P52948	NUP98	3.04	0.000123771	0.875
FDIELGR	Q9BYP7;B1AQN8;E9PCD1;H0Y7T5;Q9Y3S1;A6PVV2	Q9BYP7	WNK3;WNK2	2.84	0.00012405	0.875
VPSYQALLR	P12109;A0A087X0S5	P12109	COL6A1	6.95	0.000124111	0.875
LTILAAR	Q15746;A0A8I5KU53;A0A8I5QKL9;A0A8I5KUP2;A0A8I5KUB2;A0A8I5QJW9;A0A8I5QKW8;A0A8I5QJT9;D6R9C2;A0A8I5KTQ1	Q15746	MYLK	4.38	0.000124155	0.875
LLLAIVGQ	P20073	P20073	ANXA7	4.21	0.000124312	0.875
PRPPTLLSQEQIK	P55884	P55884	EIF3B	4.5	0.00012445	0.875
AAAATAAEGVPSR	M0R2P6;Q8TBC3;M0R2U6;M0QZF2;M0QYJ9	M0R2P6	SHKBP1	3	0.000125042	0.875
LGPHTDNIGR	Q6PJ69;H0YG27	Q6PJ69	TRIM65	3.21	0.00012593	0.875
LDYLGVSYGLTPR	Q9H0A0	Q9H0A0	NAT10	2.96	0.000127011	0.875
FVVQNVSAQK	Q92598;A0A0A0MSM0	Q92598	HSPH1	4.57	0.000127368	0.876
VFPNGLASQEGTIQK	Q14005;A0A8C8KBU6;H0YLH9	Q14005	IL16	4.16	0.000127866	0.876
VVFRDPYR	P62917;E9PKZ0;E9PKU4;G3V1A1	P62917	RPL8	5.81	0.000128305	0.876
IAPESAIK	A0A804HLB0;Q6KCM7;A0A804HI56;M0QZT4;M0QZP9;Q9BV35;M0QZJ5;M0R1W8	A0A804HLB0	SLC25A25;SLC25A23	5.61	0.00012833	0.876
RALEQQVEEMR	A0A8I5KZ38;P35580	A0A8I5KZ38	MYH10	3.28	0.000129028	0.876
SASLDSPVLLVIK	Q8NI08;H0Y6T0	Q8NI08	NCOA7	3.3	0.000129354	0.876
AFNSSSFNSNTFLTR	P46060	P46060	RANGAP1	3.12	0.000130439	0.876
ELPEPLLTDR	I3L4Y1;Q12979;A0A1C7CYZ0;A0A0G2JQ41;B7Z683;I3NI05	I3L4Y1	ABR	3.15	0.000130446	0.876
AAQIFITELTLR	Q13952;Q5T6K7;E9PI99;Q5T6K5;A0A0A0MT00;E9PL11	Q13952	NFYC	3.61	0.00013109	0.876
DKDGQPQVVPVAADQR	A0A140TA33;A0A140T902;A0A140TA41;A0A140T9C0;P22105;A0A140TA52;A0A140T8Y3;A0A140T8Z8;A0A140T956;A0A140T923;A0A3B3ISX9	A0A3B3ISX9	TNXB	3.88	0.000131372	0.876
MLGTEGGEGFVVK	P31943;G8JLB6;E9PCY7;D6RBM0;D6RIU0;D6RFM3;D6RIT2;E7EN40;E5RGV0;D6R9T0;D6RDU3;D6RJ04;D6RIH9;E7EQJ0;D6RDL0;D6RF17;D6R9D3;E5RJ94;D6RAM1	P31943	HNRNPH1	4.16	0.000131419	0.876
QLYEFDIK	P15586;H7C3P4;F6S8M0;H0YFA9	P15586	GNS	4.41	0.000131518	0.877
EKTPLEHIFR	Q14699;G3XAJ6;C9JHG2;C9JRN3;C9JWQ9;F8WAR1	Q14699	RFTN1	3.49	0.000131685	0.877
LSFSVSR	H0Y6Y8;B1AL05;Q8N983;M0R051	H0Y6Y8	MRPL43	3.99	0.000131735	0.877
VDVGKDQEFTVK	P21333;A0A7P0NMY4;Q60FE5	P21333	FLNA	6.38	0.00013187	0.877
IAFSATR	A0A0A0MSV6;D6R934;P02746;D6RGJ1	A0A0A0MSV6	C1QB	6.11	0.000131966	0.877
VLQPHPVTPSDTETR	I3L2C7;P57678;I3L4A4;I3L399;E7EN12;I3L4M4	I3L2C7	GEMIN4	3.22	0.000131974	0.877
INQFYGAPTAVR	Q9NUB1	Q9NUB1	ACSS1	3.8	0.000131985	0.877
IISVGVQK	A6NMZ7	A6NMZ7	COL6A6	4.1	0.000132014	0.877
LAASFQSMEVR	Q7L523;Q5VZM2	Q7L523	RRAGA;RRAGB	4.29	0.000132032	0.877
IPDSIAVIQQLSPK	Q5K651;C9JKF1	Q5K651	SAMD9	2.87	0.000132077	0.877
DLAVAGPEMQVK	Q14764	Q14764	MVP	3.88	0.000132104	0.877
EVLDQVER	P12931	P12931	SRC	6.03	0.00013229	0.877
NIILGGVK	P22314;Q5JRR9;Q5JRS0;Q5JRS1;Q5JRS3;Q5JRS2	P22314	UBA1	5.74	0.000132343	0.877
TVIEPMASEGLR	P20020;E7ERY9	P20020	ATP2B1	3.8	0.000132345	0.877
APSTPLLTVR	Q9BY44;F8WAE5;C9IZE1;F8WF18;F8WAT3	Q9BY44	EIF2A	4.31	0.00013272	0.877
LLNPNIAK	Q16831;C9J486;C9JIP2;B4DND0;F8WD51;C9K0J2	Q16831	UPP1	3.57	0.000133453	0.877
LAQFIGNR	O00567;A0A494C128;Q5JXT2	O00567	NOP56	4.26	0.000134493	0.877
LSPVPVPR	Q5QPL9;Q5QPM0;Q5QPM1;Q9UKM9	Q9UKM9	RALY	4.64	0.000134663	0.877
VNVEDAGGETLGR	P69891;A0A2R8Y7X9;P69892	P69891	HBG1;HBG2	4.84	0.000135068	0.877
GTLSFIAK	A0A2R8Y611;K7ELX8;K7ERW8;O14617	O14617	AP3D1	4.23	0.00013514	0.877
MGDTHTGLALVYAK	Q6PCB0;J3QLP3	Q6PCB0	VWA1	3.86	0.000135236	0.877
LGLHSLR	P61204;H0YGG7;P84077	P84077	ARF3;ARF1	5.28	0.000135257	0.877
EALPDGVNISK	Q9NRF9	Q9NRF9	POLE3	3.83	0.000135324	0.877
QLLQAALR	Q6P1N0;A0A7P0Z4M5	Q6P1N0	CC2D1A	3.16	0.00013577	0.877
FVLVHPDVK	Q9BZJ0;Q5JY65	Q9BZJ0	CRNKL1	3.16	0.000136026	0.878
VDLVLEK	P17900;H0YBY3;E5RJD0	P17900	GM2A	4.61	0.000136076	0.878
AIDSSNLKDDYSTAQR	Q5JVF3	Q5JVF3	PCID2	2.86	0.000136724	0.878
SMLEVNYPMENGIVR	P61160	P61160	ACTR2	2.91	0.000136738	0.878
HFCGGALIHAR	P20160	P20160	AZU1	3.12	0.000136929	0.878
SSIHISNLEPELR	Q9BWM7	Q9BWM7	SFXN3	4	0.000136943	0.878
PTPEELEQR	Q8IZ21	Q8IZ21	PHACTR4	3.48	0.000137148	0.878
TENLNDDEKLNNAK	P13796	P13796	LCP1	5.81	0.000137197	0.878
LTTPPVNTR	Q92616	Q92616	GCN1L1	3.64	0.000137211	0.878
YISIGSEAEK	Q9UIQ6	Q9UIQ6	LNPEP	3.26	0.000137294	0.878
ELVALMSAIRDGETPDPEDPSR	P09960	P09960	LTA4H	3.75	0.000137507	0.878
AFGIPIR	P06493;A0A024QZP7;E5RIU6	P06493	CDK1;CDC2	3.62	0.000137702	0.878
TTIYEIQDDR	Q16666;H3BR88	Q16666	IFI16	3.45	0.000138304	0.878
LDPSVDFSAFMK	A0A0A0MTR7;A0A0A0MTC1;Q63HN8	A0A0A0MTR7	RNF213	3.34	0.000138476	0.878
VRVELSNGEK	P84103	P84103	SRSF3	4.21	0.000138497	0.878
SPLFSVQR	Q8WUA4	Q8WUA4	GTF3C2	3.03	0.000138534	0.878
GPILSFASTR	P40937;C9JH72;F5H5S0;E9PEP3	P40937	RFC5	3.59	0.000138536	0.878
GFQSLLSEVNR	P50452;A0A1B0GU38;H7BXK7;C9JVA8;C9JTJ8	P50452	SERPINB8	4.29	0.000138599	0.878
SIMSYNGGAVMAMK	P49720;A0A087WXQ8;A0A087WY10	P49720	PSMB3	4.85	0.000138941	0.878
EMMLVTSGAVAFGK	P54886	P54886	ALDH18A1	3.81	0.000139021	0.878
VDFSLAGALNAGFK	A0A1X7SBR3;A0A1W2PR46;P14136;A0A1X7SCE1;K7EJU1;K7EKH9;K7ELP4;B4DIR1	A0A1X7SBR3	GFAP	5.25	0.000139049	0.878
LTPSGSISLIK	A0A087WZV0;O43314	A0A087WZV0	PPIP5K2	3.24	0.000139125	0.878
NLLLSGAQLEASR	Q9BWM7;S4R3N9	Q9BWM7	SFXN3	4.51	0.000139405	0.878
AYAAGFGDR	F5H7V9;J3QSU6;H0YGZ3;P24821;E9PC84	P24821	TNC	4.86	0.000139976	0.878
ANVAVVSGAPLQGLVAR	G5EA09	G5EA09	SDCBP	3.43	0.000140038	0.878
PHYGSVLDNER	P46940;A0A0J9YXZ5;H0YLE8;A0A087X225	P46940	IQGAP1	3.45	0.000140356	0.878
GELPDFQDGTK	A0A804HKH9;O00170;A0A804HIX8;A0A804HJ38;V9GYQ3;E9PMH2;A0A804HKK3;A0A804HKP8;A0A804HJ46	A0A804HKH9	AIP	4.29	0.000140546	0.878
ILSPPDISR	A0A0A0MTR7;A0A0A0MTC1;Q63HN8	A0A0A0MTR7	RNF213	2.88	0.000140703	0.878
LAGAPLPEDR	A0A590UJL0;P08842;A0A590UJY9;A0A590UJT4	A0A590UJL0	STS	3.16	0.000140939	0.879
FDYIPPVNADDLSK	A0A3B3ITK0;P35442;A0A7I2YQT6;A0A7I2V585;A0A7I2V344;Q5RI53	A0A3B3ITK0	THBS2	3.77	0.000140975	0.879
GATGIFPLSFVK	Q15080;A0A0G2JR51;A0A494BZS1;A0A217FLJ2;B0QY04	Q15080	NCF4	3.2	0.000141278	0.879
LLVTTSTSLQK	O75146	O75146	HIP1R	3.94	0.000142456	0.879
NIAPNISR	Q9BXP5;H7C3A1;H7C1K0	Q9BXP5	SRRT	4.33	0.000142467	0.879
LLIYGASSLQSGVPSR	sp|A081254|abysis_81254;sp|A007991|abysis_7991;sp|A052424|abysis_52424;sp|A057424|abysis_57424;sp|A084528|abysis_84528;sp|A064180|abysis_64180;sp|A061273|abysis_61273;sp|A087694|abysis_87694;sp|A071556|abysis_71556;sp|A065529|abysis_65529;sp|A057581|abysis_57581;sp|A069140|abysis_69140;sp|A005275|abysis_5275;sp|A000978|abysis_978;sp|A078082|abysis_78082	sp|A081254|abysis_81254		3.46	0.000142732	0.879
IGVHAFQQR	P05161;A0A096LPJ4;A0A096LNZ9	P05161	ISG15	5.28	0.000142954	0.879
NFPQTALVSFATTGEK	A0A8I5KW55;Q8N766;H7C5A2;A0A8I5KRL9;A0A8I5KQA0;A0A8I5KTE8;A0A8I5KXE1	A0A8I5KW55	EMC1	4.03	0.000143604	0.879
ETSELGGSDVSILDTTR	A0A0A0MTR7;A0A0A0MTC1;Q63HN8	A0A0A0MTR7	RNF213	3.37	0.000143811	0.879
TNQYGILFK	Q9GZS3;H0YN81;H0YMF9;H0YL19;H0YM76	Q9GZS3	WDR61	3.92	0.000143991	0.879
AVVVHAGEDDLGR	P08294	P08294	SOD3	3.94	0.000144191	0.879
AVAEPGIQLK	E7ES19;P35443;G3XAP6;P49747;CON__ENSEMBL:ENSBTAP00000006074	G3XAP6	THBS4;COMP	3.5	0.000144406	0.879
LISSTESELQQSYAK	O43149	O43149	ZZEF1	2.92	0.000144622	0.879
SRLEQEIATYR	CON__P08727;P08727;CON__P19001	CON__P08727	KRT19	7.15	0.000144822	0.879
KDHSGQVFSVVSNGK	P07996	P07996	THBS1	4.65	0.000145264	0.879
LVSDINR	P11277	P11277	SPTB	3.49	0.00014584	0.88
INTDEIMTSLK	CON__P04258;P02461	P02461	COL3A1	3.88	0.000146047	0.88
DAFSLAEGLR	Q9Y6K5;A0A7P0T9W6;A0A7P0T9J0;A0A7P0Z4D0;A0A7P0T8S7;A0A7P0TAU8;A0A7P0Z4F1;A0A7P0TAC0;A0A7P0Z4F5;A0A7P0T7V2;A0A7P0TAS0;A0A7P0TB73;A0A7P0TAC8;A0A7P0TAV3;A0A7P0T8J8;A0A7P0TA50	Q9Y6K5	OAS3	4.26	0.000146422	0.88
SSTPAQLAFMR	A6NEM2;P51610;H7C1C4	A6NEM2	HCFC1	4.37	0.000146433	0.88
TFSSIPVSR	Q14204;A0A2R8Y706;A0A7P0T9C4;A0A7P0TA13;A0A2R8Y5T0;A0A7P0T9R4;A0A7P0TAW9;A0A7P0T7V5;A0A7P0T916;A0A7P0T8N2;A0A7P0TBJ7	Q14204	DYNC1H1	3.17	0.000146529	0.88
VSPVSYLR	Q8TEM1	Q8TEM1	NUP210	3.16	0.000147063	0.88
VVTVSGEPEQVHK	A0A6Q8PFC2;Q9UNW9	A0A6Q8PFC2	NOVA2	3.01	0.000147581	0.88
ASGGTSEFITGK	O00534	O00534	VWA5A	3.48	0.000147792	0.88
YLVIDEAHR	O60264;B7ZLQ5;P28370;A0A0A0MRP6	O60264	SMARCA5;SMARCA1	3.57	0.000147943	0.88
TEFDREIDR	P19367	P19367	HK1	3.75	0.00014845	0.88
EIEMLNNLK	Q92608;E5RFJ0	Q92608	DOCK2	3.35	0.000148488	0.88
LSGGIDFNQPLVITR	A0A087WYF8;Q53GG5;A0A2U3TZH4;A0A2R8Y6L7;D6RAF1	A0A087WYF8	PDLIM3	4.87	0.000148705	0.88
KDSEDMGVVVSLGTGNR	A0A3B3IRQ9;P55265;A0A7P0Z4K3;A0A7P0Z4F9;A0A3B3ISU1	P55265	ADAR	3.28	0.000148761	0.88
NKLNDLEDALQQAK	P04264;CON__P04264	P04264	KRT1	5.12	0.000148831	0.88
FGDLDEQEFVYKEPAITK	Q8NF50;A2A369;Q96N67;A0A1B0GWE0	Q96N67	DOCK8;DOCK7	3.47	0.000148833	0.88
ATIFNLK	Q9BY44;F8WAE5;H7C5R5	Q9BY44	EIF2A	3.02	0.000149016	0.88
SEPPVSEQLDVAGR	Q6VY07;B4DF77	Q6VY07	PACS1	3.69	0.000149747	0.88
FTHAFSSDLMR	Q9NQ88	Q9NQ88	TIGAR	3	0.000150344	0.88
IGLDLAALNMQR	P11678	P11678	EPX	4.89	0.000151041	0.881
AFTNTATATEEDVK	Q5K651;C9JKF1	Q5K651	SAMD9	3.27	0.000151145	0.881
ALLVNVK	O00329;F8W9P4	O00329	PIK3CD	3.04	0.00015133	0.881
VNIVFNYDMPEDSDTYLHR	O00148	O00148	DDX39A	4.09	0.000151381	0.881
VFLDHNALPDTLK	A0A494C0X7;P05107;D3DSM0	A0A494C0X7	ITGB2	5.56	0.000151404	0.881
VADPDHDHTGFLTEYVATR	P28482	P28482	MAPK1	3.05	0.000151456	0.881
QNVPIIR	Q5VIR6;A0A7P0T9B2;A0A7P0Z400;A0A7P0TAE0;A0A7P0TA79;A0A7P0TAK4;A0A7P0Z4K0;A0A7P0T8P7;E7EVT8;A0A7P0TA53;A0A7P0TBK3;A0A7P0T8A5;A0A7P0T8D0	Q5VIR6	VPS53	3.54	0.000152121	0.881
MLPEIDQNKDR	P78344;D3DQV9;H0Y3P2	P78344	EIF4G2	3.41	0.000152283	0.881
HPQPGAVELAAK	P27708;F8VPD4;H7C2E4	P27708	CAD	3.73	0.000152543	0.881
RPGEEGTVMSLAGK	O96008;K7EKG4	O96008	TOMM40	3.72	0.000153041	0.881
PAFSAIR	P02745;X6RLJ0	P02745	C1QA	6	0.000153095	0.881
GADLSLR	F5GZZ9;C9JHR8;Q86VB7	Q86VB7	CD163	5.47	0.00015365	0.881
IIQGQGVDEPLSETGFK	Q9NQ88	Q9NQ88	TIGAR	3.7	0.00015374	0.881
EIAEAYLGGK	P54652	P54652	HSPA2	4.52	0.000153961	0.881
DGGVLSPILTR	C9JW74;Q5EB52;C9JWU9;R4GN52	C9JW74	MEST	3.58	0.000154011	0.881
NGVQAMVEFDSVQSAQR	A0A3B3ITJ4;M0R1W6;B4DVF8;M0QYL7;P14866;M0QXS5	P14866	HNRNPL	3.74	0.000154314	0.881
VVVQENLR	Q8IV20	Q8IV20	LACC1	3.6	0.000154906	0.881
VGSIFLQLK	A0A2R8Y455;A0A2R8Y620;A0A2R8Y7U2;A0A2R8Y600;Q86VX2	A0A2R8Y455	COMMD7	3.57	0.000154954	0.881
DISTTLNADEAVAR	O95757;E9PDE8;D6RJ96;Q92598;A0A0A0MSM0	Q92598	HSPA4L;HSPH1	2.79	0.000154976	0.881
QVPVESDLQEIIK	Q13043;F5H5B4;Q13188;A0A087WZ06;E5RFQ9;Q8NBU1;E5RIM6	Q13043	STK4;STK3	3.67	0.000154979	0.881
IVASSHDHGYTTLATSVTLLK	G5E975;B5MCL5;A0A2R8YEE8;A0A0U1RQQ2	G5E975	SMARCB1	3.49	0.000155434	0.881
SQSVRPGADVTFICTAK	P98160	P98160	HSPG2	5.22	0.000155474	0.881
DLASIAR	P07996;CON__Q28194	P07996	THBS1	4.08	0.000155511	0.881
FQVMIQK	Q86SZ2	Q86SZ2	TRAPPC6B	3.12	0.000155702	0.881
LSLVPSSAR	Q8NFF5;Q5T196	Q8NFF5	FLAD1	3.08	0.000155726	0.881
LLPAVTFDGK	Q3KQV9	Q3KQV9	UAP1L1	3.01	0.000155737	0.881
GFGFVTFENEDVVEK	Q96DH6;B4DHE8;A0A6Q8PF05;A0A6Q8PGD8;B4DM51	Q96DH6	MSI2	2.97	0.000155775	0.881
AVLLAGPPGTGK	Q9Y265;E7ETR0	Q9Y265	RUVBL1	5.41	0.000155796	0.881
LQGIGHFQNTIR	A0A7P0T890;Q03001;F8W9J4;E9PHM6;F6QMI7	A0A7P0T890	DST	3.08	0.000156083	0.881
LRQEEPQSLQAAVR	H3BT57;H3BUJ5;P29590;H3BT29;H3BVD2	P29590	PML	4.27	0.000156214	0.882
NQTQLSNKHELQLEQMHK	O94804	O94804	STK10	3.32	0.000156253	0.882
GFGGIGGILR	P62495;B7Z7P8	P62495	ETF1	4.39	0.000156417	0.882
HPEELSLLR	Q86UX7;F5H1C6	Q86UX7	FERMT3	5.39	0.00015695	0.882
QLQQAQAAGAEQEVEK	P39748;F5H1Y3	P39748	FEN1	3.74	0.00015702	0.882
VDSFNEEVRK	P18084;V9GZ57;H7C4W1;V9GYZ1	P18084	ITGB5	3.4	0.000157184	0.882
ANVAVVSGAPLQGQLVAR	O00560	O00560	SDCBP	4.27	0.000158241	0.882
QQVPSGESAILDR	P09874;A0A7I2V3E1;A0A7I2V625;A0A7I2V5E9	P09874	PARP1	2.58	0.000158395	0.882
TDAAVSFAK	P05141	P05141	SLC25A5	6.45	0.000158423	0.882
SLPVPQLVPETEDEK	O00154	O00154	ACOT7	3.97	0.000159043	0.882
SYDLSDITQADLSR	O75427	O75427	LRCH4	2.8	0.000159469	0.882
IAPAEGPDVSER	F8W930;Q9Y6M1	F8W930	IGF2BP2	3.26	0.000159602	0.882
YDLQNLKPYTK	P08575;M3ZCP1;A0A075B788;E9PKH0;A0A140TA77;A0A140TA68;A0A0G2JNW2	P08575	PTPRC	3.77	0.000159711	0.882
AMEGIFMKPSELLK	Q99470	Q99470	SDF2	3.65	0.00015979	0.882
HSLEQKPTDAPPK	P04233	P04233	CD74	3.11	0.000159952	0.882
IGTDGTQVAMVQFTDDPR	Q05707	Q05707	COL14A1	6.21	0.000160046	0.882
VLSLQEEIAK	G3V394;A0A8I5KWE1;A0A8I5KX10;A0A8I5KV14;A0A8I5QJE6;A0A8I5QJA8;A0A8I5KTF1;Q9Y4I1;F8WE88;A0A8I5KYM3;A0A8I5QKR9;A0A8I5QKS7	A0A8I5KTF1	MYO5A	2.91	0.000160408	0.882
GSYGSGGSSYGSGGGSYGSGGGGGGHGSYGSGSSSGGYR	P04264;CON__P04264	P04264	KRT1	4.6	0.000160515	0.882
VTATDLDEPDTLHTR	Q08554	Q08554	DSC1	2.71	0.000160984	0.882
STESYFIPEVR	P16284;A0A075B727;A0A075B728;A0A075B737	P16284	PECAM1	3.89	0.000161359	0.882
LELQQLQAER	P48681	P48681	NES	4.29	0.000161579	0.882
NETGGGEGVEVLVNEPYEKDGEK	Q00169;I3L471;I3L4U7	Q00169	PITPNA	3.4	0.000161614	0.882
LEDLKEQLAPLEK	Q8NE86	Q8NE86	MCU	4.16	0.000161639	0.882
LASVPGSQTVVVK	O00592	O00592	PODXL	3.44	0.000162032	0.883
KLEIGFNGNR	Q5TB53;Q9HD45	Q9HD45	TM9SF3	3.71	0.000162491	0.883
SLPGAEDYIK	O75718;C9JP16	O75718	CRTAP	3.81	0.000162593	0.883
AISAHFDDSSASSLK	A0A7I2V423;Q9P0M6;A0A7I2V412	Q9P0M6	H2AFY2	4.3	0.000162702	0.883
VIVMTTR	P29350	P29350	PTPN6	4.53	0.000162911	0.883
RPLHSAQAVDVASASNFR	Q9H4A4;A6NKB8	Q9H4A4	RNPEP	5.96	0.000162991	0.883
HSSALGGASLGAR	Q9UJ70;H7C3G9;C9JEV6;H0YF44;H7C286	Q9UJ70	NAGK	4.38	0.000162998	0.883
KNDPLPISTVGTR	Q9NVM9;H0YH12	Q9NVM9	ASUN	2.98	0.000163157	0.883
TEFDFSDYVK	P20701;A0A7I2V4B0;A0A7I2V498	P20701	ITGAL	4.61	0.000163275	0.883
LPPTSLKPDTFR	Q9GZQ3;H0YEQ6;E9PJE4	Q9GZQ3	COMMD5	3.26	0.000163942	0.883
LSNHISSLFR	P11413;E7EUI8;E7EM57;E9PD92	P11413	G6PD	4.45	0.000164328	0.883
LLHSLDQAKEELER	O15230	O15230	LAMA5	3.04	0.00016444	0.883
ASNNTASIAQAR	P59768;G3V2C9	P59768	GNG2	4.3	0.000164742	0.883
TKENILEEFSK	O43390;B4DT28;A0A6Q8PH31;A0A6Q8PEX7;A0A6Q8PHG0	O43390	HNRNPR	5.16	0.000164806	0.883
QALQETLHR	M0R0P8;Q13459;M0R300	M0R0P8	MYO9B	2.77	0.000164829	0.883
TTFANVVNVCGNQSIR	P12724	P12724	RNASE3	3.17	0.000165378	0.883
IVLEDGTLHVTEGSGR	A0A1C7CYX9;Q16555	A0A1C7CYX9	DPYSL2	3.45	0.00016567	0.883
GSPLVVISQGK	A0A1C7CYX9;Q16555	A0A1C7CYX9	DPYSL2	5.98	0.000165855	0.883
VDEIDAAIQR	H3BQK9;H3BPE1;O94854;Q9UPN3	H3BQK9	MACF1;KIAA0754	3.63	0.000165987	0.883
MILTFEK	Q8WYA6;A0A087WUB9;A2A2P1	Q8WYA6	CTNNBL1	2.96	0.000166324	0.883
SDQKQEQLLLK	P42224;A0A669KB68;A0A669KB56;A0A669KBA4;A0A669KB53;A0A669KBI6;J3KPM9;A0A669KB52;A0A669KB75;E7EPD2;A0A669KB17	P42224	STAT1	5.73	0.000166373	0.883
SLESQVENLQK	P12270	P12270	TPR	3.41	0.000166658	0.883
ATQALVLAPTR	J3QLN6;J3QKZ9;P60842;J3KT12;J3QS69;J3KTB5;J3QL43;J3QR64;J3KS25	P60842	EIF4A1	6.05	0.000166983	0.883
VAVELALLGAR	Q8TDZ2;Q5TED7	Q8TDZ2	MICAL1	2.95	0.00016757	0.883
VSPYVNGEIQK	P80217	P80217	IFI35	4.18	0.000167785	0.884
LPANHPLLTGQR	P38606	P38606	ATP6V1A	4.9	0.000168056	0.884
LILPELQAR	Q86WV6;A0A494C0W5;J3QTB1;A0A494C0T1	Q86WV6	TMEM173	3.68	0.000168287	0.884
LGQNGIEDFKK	Q9Y5S2;A0A0A0MRJ0;Q5VT25;A0A0A0MRJ1	Q9Y5S2	CDC42BPB;CDC42BPA	3.09	0.000168424	0.884
DYTSGAMLTGELK	P23381	P23381	WARS	3.62	0.000168624	0.884
DIRDPNFCER	G3XAI2;P07942;A0A7I2V4J9;A0A7I2V5X5;A0A7I2V3I5;A0A7I2V2T9;A0A7I2V3J7;A0A7I2V682;A0A7I2V407;A0A7I2V2J0;A0A7I2V5R0;E7EPA6;A0A7I2V2R2;C9J296;A0A7I2V5T9	G3XAI2	LAMB1	3.58	0.000168654	0.884
FAADFAAEAASK	Q8TF42	Q8TF42	UBASH3B	3.04	0.00016881	0.884
TETMNVVMETNK	P12270	P12270	TPR	3.34	0.000169172	0.884
EVGIPPEQSLETAK	P61158;B4DXW1;Q9P1U1;A0A0A0MTI9;Q9C0K3;H7C4J1	P61158	ACTR3;ACTR3B;ACTR3C	3.31	0.000169376	0.884
AETLEFNDVYQEVK	Q08945	Q08945	SSRP1	4.32	0.000169584	0.884
LSVEAPPK	P53990;H3BMU1;H3BUI0;H3BQF7;J3KR23	P53990	IST1	4.02	0.000169794	0.884
VLATVTKPVGGDKNGGTR	Q02878;F8VZ45;U3KQR5;F8VZA3;F8VWR1;F8VU16	Q02878	RPL6	5.89	0.000169893	0.884
LQSVLGK	A8K8J9;Q13561;A0A7I2V4H4;A0A7I2V4Y9;F8W1I6	Q13561	DCTN2	4.39	0.000170175	0.884
ANLSLLR	P23246	P23246	SFPQ	4.76	0.000170259	0.884
VSPGAFTPLVK	P07585;F8VXZ8;F8VUF6;F8VWU0	P07585	DCN	7.35	0.000170585	0.884
TQIQSQESDLKSQEDDLNR	Q9UBC2;M0R165;M0R2S2	Q9UBC2	EPS15L1	2.75	0.000170937	0.884
GQLVVNPEALK	P32456	P32456	GBP2	4.34	0.000171433	0.884
AAILDLEK	Q15075	Q15075	EEA1	5.1	0.000171461	0.884
GQLQEAIEHYR	O15294;C9JZL3	O15294	OGT	3.06	0.000171621	0.884
AELNGKDGFIPK	P62993;J3KT38;J3QRL5	P62993	GRB2	3.38	0.000171699	0.884
AQLQNFVK	Q15057;A0A0U1RQT1	Q15057	ACAP2	3.39	0.000172273	0.884
LIVGTAGR	O43684;J3QT28	O43684	BUB3	4.52	0.000172344	0.884
AKLDELSAK	Q9UQE7	Q9UQE7	SMC3	3.79	0.000173023	0.884
YLESKEDVADALLQTDQSLSEK	P32456	P32456	GBP2	3.82	0.000173269	0.884
DSERPSGIPER	sp|A009620|abysis_9620;sp|A009608|abysis_9608;sp|A072660|abysis_72660;sp|A005187|abysis_5187;sp|A036997|abysis_36997;sp|A035877|abysis_35877;sp|A061317|abysis_61317;sp|A006023|abysis_6023;sp|A006096|abysis_6096;sp|A018441|abysis_18441	sp|A009620|abysis_9620		5.05	0.000173989	0.884
IETQDIQALR	A0A1W2PPH1;P23368;A0A1W2PQT3;A0A1W2PQY8;A0A1W2PR68;A0A1W2PQF8;A0A1W2PRS2;A0A1W2PRY9;A0A1W2PQH4;A0A1W2PRH1;A0A1W2PQH3;A0A1W2PQ37	A0A1W2PPH1	ME2	5.2	0.000174029	0.885
LQEQEQLLK	P32455	P32455	GBP1	4.37	0.000174385	0.885
GIIIQGGK	O14786;E9PEP6;Q5JWQ6;E7EX60;Q5T7F0;Q5JWQ4;V9GYL7	O14786	NRP1	3.44	0.000174485	0.885
GNFHAVYRDDLKK	P05109	P05109	S100A8	6.56	0.000174719	0.885
QASPNIVIALAGNK	P51148;K7ENY4;K7ERI8;K7ERQ8	P51148	RAB5C	6.11	0.000174821	0.885
KLGDTYPSISNAR	Q9H4A4;A6NKB8	Q9H4A4	RNPEP	3.35	0.000175002	0.885
EVQLVQSGAEVR	sp|A036025|abysis_36025;sp|A084742|abysis_84742;sp|A063142|abysis_63142;sp|A084668|abysis_84668;sp|A085167|abysis_85167;sp|A083326|abysis_83326;sp|A036010|abysis_36010;sp|A003518|abysis_3518;sp|A003515|abysis_3515;sp|A002930|abysis_2930;sp|A084403|abysis_84403;sp|A003513|abysis_3513;sp|A085686|abysis_85686;sp|A003528|abysis_3528;sp|A003526|abysis_3526;sp|A003525|abysis_3525;sp|A003524|abysis_3524…	sp|A003513|abysis_3513		3.57	0.000175644	0.885
SQDEAPGDPIQQLNLK	Q86UX7	Q86UX7	FERMT3	4.29	0.000175698	0.885
ITQSEFDR	Q9Y371;A0A087WW40	Q9Y371	SH3GLB1	3.69	0.000176259	0.885
LITDLQDQNQK	P33176	P33176	KIF5B	3.06	0.000176279	0.885
SKPPFLLEK	P55160;F8W050	P55160	NCKAP1L	3.91	0.000176517	0.885
VKDPNSGLPK	B4DDD6;Q9UJU6;F8WBG8	Q9UJU6	DBNL	5.02	0.000176593	0.885
GFVEFAAKPPAR	Q8WXF1;X6RDA4	Q8WXF1	PSPC1	4.65	0.00017694	0.885
INSLTEEKDDFINK	Q8IWJ2;A0A8I5KW38;A0A8I5KVA2;A0A8I5QJB7;B8ZZW2	Q8IWJ2	GCC2	2.87	0.000176951	0.885
EQGPYETYEGSPVSK	P23921;E9PL69	P23921	RRM1	2.79	0.000177388	0.885
YLESAGAR	Q92820;A0A7I2YQQ3;A0A7I2V5X9;A0A7I2V5P2	Q92820	GGH	4.45	0.00017746	0.885
AALSSFQK	P61201;H0YKU5	P61201	COPS2	4.32	0.000177964	0.885
VATYLPAPEGLK	F5H7V9;J3QSU6;P24821;E9PC84	P24821	TNC	3.41	0.000178016	0.885
ELSELVYTDVLDR	Q8WU39	Q8WU39	MZB1	4.02	0.000178204	0.885
KSPDSDVAATLK	A0A087WUT6;O60841	A0A087WUT6	EIF5B	2.96	0.000178606	0.885
LAALPNVYEVISK	P33992;B1AHB1	P33992	MCM5	4.03	0.000178611	0.885
ALKDPNQLIR	O00203	O00203	AP3B1	4.21	0.000179062	0.885
DLISYLEK	Q92619;K7ES98;K7EM85;F5H1R4	Q92619	HMHA1	3.22	0.000179504	0.885
IAPAFSSMSNK	O43396;K7ER96;K7EML9;K7EPB7	O43396	TXNL1	5.7	0.000179726	0.885
VLVGEFVR	Q9H0J9	Q9H0J9	PARP12	2.56	0.000179807	0.885
EQAEAEVASLNR	A0A087WWU8;D6R904;A0A494C0G0	A0A087WWU8	TPM3	2.89	0.000180215	0.885
EIPVESIEEVSK	O60502;H7C3X0	O60502	MGEA5	3.97	0.000180278	0.885
LSSSQGTIETSLQDIDSR	Q9UHD2;A0A494C045;A0A7I2V646;A0A7I2V4W4;A0A494C167;A0A494C148;A0A494C0X2;A0A7I2V2F4;A0A494C1M6;A0A494C0A8;A0A494C0R4;A0A7I2V463;A0A7I2V2N0;A0A7I2V387	Q9UHD2	TBK1	2.68	0.000180339	0.885
QALNEISAR	Q12846	Q12846	STX4	4.12	0.000180605	0.886
QPAVEEPAEVTATVLASR	P32942;K7ERN2	P32942	ICAM3	3.24	0.000181235	0.886
SGDGVVTVDDLR	K7ES72;A0A499FJ41;Q13938	Q13938	CAPS	3.73	0.000181285	0.886
VLEDPAIASDESFGAVK	O95544;A0A0A0MR98;J3KTI3	O95544	NADK	2.99	0.000181394	0.886
EDSPSEDPVFLR	A0A2R8Y507;B1ALS0;Q13976	Q13976	PRKG1	3.26	0.000181889	0.886
KELLLPGNNR	P05362;K7EKL8	P05362	ICAM1	3.49	0.000181927	0.886
ADTLTLK	B5MCX3;C9J2Q4;H7C2Y0;Q15019	Q15019	37500	5.5	0.000181986	0.886
ELLQEQLEQLQR	C9J2V2;A0A087X1B1;A0A8I5KQX1;Q9Y6K9;D3DWY0;A0A087X0G7;A0A087WUW6;A0A8I5KQX5	C9J2V2	IKBKG	3.7	0.000182139	0.886
LDSTDFTGTIK	P02786;G3V0E5	P02786	TFRC	3.91	0.000182171	0.886
IMQVVDEK	Q13510;A0A1B0GTZ5;A0A1B0GTM3;A0A1B0GUA4;A0A1B0GW68;E7EMM4;A0A1B0GUH5;A0A1B0GTP7;A0A1B0GUW4;A0A1B0GUE3;A0A1B0GVG2;A0A1B0GUB3;A0A1B0GU62;A0A1B0GU06;A0A1B0GVJ1;A0A1B0GW48;A0A1B0GVE7;A0A1B0GV95;A0A1B0GUJ3;A0A1B0GVA3;A0A1B0GW66	Q13510	ASAH1	5.78	0.000182398	0.886
IPELLASGMVDNMTK	P30740	P30740	SERPINB1	4.2	0.000182705	0.886
FPLVSVR	Q8NFF5;Q5T196	Q8NFF5	FLAD1	3.44	0.000182743	0.886
TIIIGHSSGAIAAMR	O75884	O75884	RBBP9	4.29	0.000183829	0.886
TLSSPTEPVK	P40306;J3QQN1	P40306	PSMB10	3.93	0.000184366	0.886
MLGPEGGEGFVVK	P52597;A0A1B0GW42	P52597	HNRNPF	5.33	0.000184698	0.886
MLVSLK	P23381;G3V3Y5;G3V3H8;G3V277;G3V456;G3V5U1;G3V423;G3V227;G3V3P2;G3V3X0;G3V2Y7;G3V3S7;G3V5W1;G3V4N8;G3V4C7;G3V2C0;G3V339;G3V313;G3V4S4;G3V4N0;G3V3R3;G3V2F2	P23381	WARS	3.98	0.000184977	0.886
GAFSVVR	D6R938;Q13557;E7EQE4;E9PBG7;E9PF82;H0Y6G2;A0A2Q3DQE3;Q13555;Q5SWX3;A0A5F9ZHM9;A0A5F9ZH21;Q9UQM7;A0A5K1VW76;A0A804HIC9;A0A5F9ZHR5;D6RFJ0;A0A5F9ZHY2;A0A5F9ZH50;A0A804HLD1;Q13554;H7BXS4;E9PBE8;E7ERS6;E7ETC9	D6R938	CAMK2D;CAMK2B;CAMK2G;CAMK2A	4.91	0.000184984	0.886
GMTSEEKEILIR	B1ALD9;Q15063	Q15063	POSTN	3.73	0.00018504	0.886
ELQVGIPVADEAGQR	Q9BWM7	Q9BWM7	SFXN3	4.52	0.00018526	0.886
KEFSPFGSITSAK	A0A7I2V4L7;B1ANR0;A0A7I2V598;H0Y5F5;Q13310;A0A7I2V5W9;H0YEU6	A0A7I2V4L7	PABPC4	2.76	0.0001854	0.886
AAAVSSVVR	A6NDU8	A6NDU8	C5orf51	3.16	0.000185536	0.886
FNILTSNQK	A0A494C164;P52630;B4DLC8	A0A494C164	STAT2	3.67	0.00018586	0.886
AISSYFVSTMSSSIK	O75367;B4DJC3	O75367	H2AFY	4.2	0.000186057	0.886
GTLVTVTEEPR	Q9BZZ2	Q9BZZ2	SIGLEC1	3.47	0.000186072	0.886
QETEFFQQNQTGNIMSR	Q03518;A0A140T9T7	Q03518	TAP1	3.03	0.000186223	0.886
RILELDQFK	P12956;B1AHC9	P12956	XRCC6	4.03	0.000186454	0.886
DFEASFIR	Q9Y2P8;Q5VYW8	Q9Y2P8	RCL1	2.7	0.000186867	0.886
GYQETDSVVSSVTTK	Q99571;H0YF70;F5GZQ9	Q99571	P2RX4	2.82	0.000186868	0.886
ALEEAANSGGLNLSAR	Q9Y2L9	Q9Y2L9	LRCH1	2.8	0.000187206	0.886
AYGPGIEPTGNMVK	P21333;A0A7P0NMY4;A0A087WWY3;A0A7I2V3E6;Q60FE5;F8WE98	P21333	FLNA	3.07	0.000187897	0.887
EPSPPIDEVINTPR	O60684;Q5TFJ7;S4R3E5	O60684	KPNA6	4.33	0.000188423	0.887
DNVLLANLLGK	Q96RW7	Q96RW7	HMCN1	2.88	0.000188862	0.887
ISASAEELR	P06727	P06727	APOA4	5.96	0.000188879	0.887
VAVVQYSGTGQQRPER	P12109;A0A087X0S5;A0A804HJ28	P12109	COL6A1	5.4	0.00018911	0.887
ELAVEAMK	Q8WUP2;E7EWE8	Q8WUP2	FBLIM1	3.15	0.000189558	0.887
GNIIISTPEK	O75643	O75643	SNRNP200	3.06	0.000189581	0.887
DLSDTVR	Q9BXJ9;A0A0B4J1W3	Q9BXJ9	NAA15	2.68	0.000189624	0.887
QTTVSNSQQAYQEAFEISK	P31946	P31946	YWHAB	3.44	0.000190077	0.887
ALQQAYDVLIK	Q5VZ89	Q5VZ89	DENND4C	3.71	0.0001901	0.887
QQDHFFQAAFLEER	P08567	P08567	PLEK	4.33	0.000190384	0.887
LSDAGITPLFLTR	P12111;E7ENL6	P12111	COL6A3	4.23	0.000190741	0.887
VPLVAEKPLKEPK	P41250;A0A6Q8PGZ8;A0A6Q8PGA8;A0A6Q8PGI6;A0A6Q8PHH9;A0A6Q8PGW4;A0A6Q8PHI7;H7C443;A0A6Q8PFZ6	P41250	GARS	5.41	0.000190798	0.887
VSVPTHPEAVGDASLTVVK	P13611;E9PF17;D6RGZ6;Q86W61	P13611	VCAN	4.7	0.000192864	0.887
LGPHVTTEYVGPSSER	A0A3B3ITK0;P35442;A0A7I2YQT6;A0A7I2V585	A0A3B3ITK0	THBS2	3.89	0.000192881	0.887
MEMEMEQVFEMK	Q16181;E7ES33;E7EPK1;G3V1Q4;A0A0U1RRM2	Q16181	39326	4.68	0.000192913	0.887
DLEAHIDSANKNRDEAIK	P35579;A0A8I5KWT8	P35579	MYH9	4.28	0.000193376	0.887
SSGVPPEVFTR	P08311	P08311	CTSG	4.93	0.000193387	0.887
AQLLGLIQR	Q9NUV9;G5E9W9	Q9NUV9	GIMAP4	5.22	0.000193583	0.887
IETSSLDGENRR	Q14112;H0YJV3	Q14112	NID2	4.81	0.000193842	0.887
FHTSRPESFAIYK	P11047;Q9Y6N6	P11047	LAMC1;LAMC3	3.3	0.00019397	0.887
LVAEGNLYSDK	P11277	P11277	SPTB	4.03	0.000194169	0.887
ELASLLR	P54802	P54802	NAGLU	2.72	0.000194197	0.887
VQQSFETPR	P49662	P49662	CASP4	3.95	0.000194304	0.887
LKGEATVSFDDPPSAK	P35637;H3BPE7	P35637	FUS	6.19	0.000194461	0.887
ACVGDVQER	A0A3B3ITK0;P35442;A0A7I2YQT6;A0A7I2YQ86	A0A3B3ITK0	THBS2	2.88	0.000195166	0.888
YGGDEIPFSPYR	P21333;Q60FE5	P21333	FLNA	3.13	0.000195266	0.888
KPGPGEPLVFGK	O15382;M0QXF9;B3KSI3;M0QZ10;M0R2K7	O15382	BCAT2	3.8	0.000195286	0.888
AGTQLLAGLR	P06756	P06756	ITGAV	4.94	0.000195401	0.888
IALNVAGK	Q9NUY8;C9IZ32	Q9NUY8	TBC1D23	3.46	0.000195905	0.888
ALAAAGYDVEK	P10412;P16403;Q02539;P16402;P22492	P16402	HIST1H1E;HIST1H1C;HIST1H1A;HIST1H1D;HIST1H1T	3.19	0.000196199	0.888
FIPLARPEVK	Q9Y3Z3;A0A2R8YCS7;A0A2R8YD90;A0A2R8YF51;A0A2R8Y5D2	Q9Y3Z3	SAMHD1	5.08	0.000196507	0.888
FDSDATSPR	A0A140TA14;A0A140TA11;Q2L6G2;D5H3J5;A0A140T9Y5;A0A140T997	Q2L6G2	HLA-B	5.04	0.000196851	0.888
GFTAAGVLAAHK	P32322;E2QRB3;J3KQ22;J3QL24;J3QR88;J3QLK9;J3QL32;J3KTA8;J3QKT3;J3QRZ0;J3QL23	P32322	PYCR1	3.48	0.000196967	0.888
SQLEAIFLR	Q8IV08;M0R3G9	Q8IV08	PLD3	4.68	0.000196982	0.888
EQASHLGGAVFSGAGNIAAATGLVK	Q16143;G4Y816	Q16143	SNCB	3.38	0.000197071	0.888
GGHVDLTMLGAMQVSK	P55809;E9PDW2	P55809	OXCT1	3.54	0.000197208	0.888
ADDYIEITGAGGKK	Q9Y3Z3;A0A2R8YCS7;A0A2R8YD90	Q9Y3Z3	SAMHD1	3.63	0.000197271	0.888
SILENLR	P02675	P02675	FGB	7.31	0.00019734	0.888
NVINTFTQTAHSGR	A0A0C4DFN8;A0A0A0MSZ4;A0A0C4DGN7;A0A0A0MT64;A0A0A0MTN9;J3QKZ8;J3QQX3;P22570	P22570	FDXR	4.78	0.000198337	0.888
GGSLPPHTQVHGSR	P98160	P98160	HSPG2	4.92	0.000198533	0.888
RLQGQLEQGDDTAAER	Q5STZ8;Q8NE71;H0YGW7	Q5STZ8	ABCF1	3.01	0.000198938	0.888
LSEHTEDLPK	A0A0C4DFX9;Q9H3P2;H0Y3X6	A0A0C4DFX9	NELFA	3.44	0.000199309	0.888
LGATIDVEHSHVR	Q7L523;Q5VZM0	Q7L523	RRAGA;RRAGB	4.04	0.000199564	0.888
YPPIVASMTADSK	Q9NP92	Q9NP92	MRPS30	2.96	0.000199968	0.888
FAGVFHVEKNGR	H0YD13;P16070;H0YDW7;H0YCV9;H0Y5E4;E9PKC6;Q86UZ1	H0YD13	CD44	3.48	0.000200215	0.888
DEATAAVIDLNDRPIGSR	Q9NTZ6	Q9NTZ6	RBM12	4.77	0.000201023	0.888
IDKELINR	P23381;G3V3Y5;G3V3H8;G3V277;G3V456;G3V5U1;G3V423;G3V227;G3V3P2;G3V3X0;G3V2Y7	P23381	WARS	4.28	0.00020195	0.888
AFLNDSQASK	A6NIW2;Q5JSL3;A0A0J9YW64	A6NIW2	DOCK11	2.73	0.000202253	0.889
SPDLGHSTQIPR	Q6VY07;B4DF77	Q6VY07	PACS1	3.82	0.000202383	0.889
LADQIFAYYK	E7EVJ5;Q96F07;H7C229;E7EW33;A0A0G2JR96;A0A0G2JQT1;Q7L576	Q7L576	CYFIP2;CYFIP1	3.54	0.000202488	0.889
ILIEENRK	O60568;H7C2V1;H7C0B8	O60568	PLOD3	3.04	0.000202761	0.889
AELEALLSSKDDVGK	Q7Z406	Q7Z406	MYH14	3.78	0.000203854	0.889
VQISYYGPK	Q9UM07;B1AQ67	Q9UM07	PADI4	2.8	0.00020459	0.889
AAAQLLQSQAQQSGAQQTK	D6RGI3;D6RER5;Q9NVA2;H0Y961;H0Y9G8	D6RGI3	40787	5.03	0.000205201	0.889
AEISFEDR	P21333;A0A7P0NMY4;H0Y5C6;Q60FE5	P21333	FLNA	4.45	0.000205564	0.889
VGTAQLALVAR	Q9UI10;E7ERK9	Q9UI10	EIF2B4	4.26	0.000205901	0.889
GPTEADELMK	P11413	P11413	G6PD	4.43	0.000206086	0.889
VFVGEEDPEAESVTLR	Q86UX7;F5H1C6	Q86UX7	FERMT3	4.79	0.000206216	0.889
MMNTIIFHTK	Q9Y2A7	Q9Y2A7	NCKAP1	3.01	0.000206289	0.889
LSPFNITHR	Q92835;H0Y5Q9	Q92835	INPP5D	3.34	0.000206442	0.889
LSQRPTTEELEQR	O75167;J3KP75	O75167	PHACTR2	2.54	0.00020675	0.889
DGTGVVEFVR	J3KTL2;Q07955;J3KSR8	J3KTL2	SRSF1	3.5	0.000206905	0.889
SIAAATSALVK	Q9Y490;Q9Y4G6;A0A1B0GVU7;H0YMT1	Q9Y490	TLN1;TLN2	5.32	0.000207333	0.889
LTDIFR	O75340;A0A024QZ42;A0A087WZ38;H0Y9X3	O75340	PDCD6	5.09	0.00020739	0.889
VEAVLSR	Q9Y6C2;A0A0A0MT20	Q9Y6C2	EMILIN1	6.15	0.000207997	0.889
KGDTVELTCTASQK	P01730	P01730	CD4	3.07	0.000208553	0.889
SPQIFDDER	O94832;J3QRN6;K7EIG7	O94832	MYO1D	3.59	0.000208777	0.889
AGFTAAYSEK	P11717	P11717	IGF2R	3.64	0.000209717	0.889
SISISVAR	P04264;CON__P04264	P04264	KRT1	5.48	0.00020977	0.889
NLGFGMGIEFR	Q9Y5B9	Q9Y5B9	SUPT16H	2.97	0.000210042	0.89
VLTDEQYQAVR	Q9ULZ3	Q9ULZ3	PYCARD	3.35	0.000210311	0.89
KASSEGGTAAGAGLDSLHK	A0A1W2PNV4;O15143;C9JEY1;C9K057	A0A1W2PNV4	ARPC1B	4.17	0.000210578	0.89
ASSLISLLK	P78344;D3DQV9;H0Y3P2;E9PKF8	P78344	EIF4G2	3.5	0.000210787	0.89
SSALREEVQSLR	H0YFY6;Q14980	Q14980	NUMA1	2.63	0.000211043	0.89
SPPEAGTQLPK	Q5VW38;G5E994	Q5VW38	GPR107	3.2	0.000211105	0.89
VGSTAVQVTSAER	P21359;A0A8I5KWR6;H0Y465	P21359	NF1	3.06	0.000211171	0.89
AAAVAVAAASR	Q7Z5L9	Q7Z5L9	IRF2BP2	2.95	0.00021211	0.89
SGTSASLAITGLR	sp|A079869|abysis_79869;sp|A083876|abysis_83876;sp|A036108|abysis_36108;sp|A023438|abysis_23438	sp|A079869|abysis_79869		3.02	0.000212353	0.89
RREPITLQDPEAK	Q6BCY4;E9PMI2;E9PIV9;E9PQW2;E9PRM4	Q6BCY4	CYB5R2	3.03	0.00021259	0.89
TPDGTENGDFLALDLGGTNFR	P19367	P19367	HK1	3.84	0.000212816	0.89
IVEQDTMPPK	O00571;A0A0D9SFB3;A0A0D9SF53;A0A2R8Y4A4;A0A2R8YFS5;A0A0D9SG12;A0A2R8YF78;A0A2R8Y645;A0A2U3TZJ9;A0A2R8YFR4;A0A2R8YCW1;A0A2R8Y5G6;F6S8Q4;A0A2R8YDH3;A0A2R8Y7T2;A0A2R8YDT5;O15523	O00571	DDX3X;DDX3Y	4.75	0.000213008	0.89
ADGISSTFSQR	P13612;E7EP60	P13612	ITGA4	3.56	0.000213326	0.89
DGEEQTQDTELVETRPAGDGTFQK	A0A0G2JH66;A0A140T9B7;A0A0G2JPA3;D0EV57;A0A140T8X0;A0A140T9V0;P30511;A0A140T939;A0A140T9W7;A0A140T9D9;A0A140T9C2;A0A140T9W3;A0A140T9X6;A0A0D9SFW8	A0A0G2JH66	HLA-F	3.8	0.000213839	0.89
FMEQVIFK	P61158;B4DXW1;F8WDR7	P61158	ACTR3	3.05	0.000215208	0.89
GVVPLAGTDGETTTQGLDGLSER	P09972;A8MVZ9;J3KSV6;J3QKP5;C9J8F3;K7EKH5	P09972	ALDOC	7.27	0.000215796	0.89
GSLLDFLKGETGK	P12931	P12931	SRC	3.23	0.000216301	0.89
RLESIATTLVSHK	Q9P2R3	Q9P2R3	ANKFY1	4.06	0.000216514	0.89
AVSNEIVR	P05164	P05164	MPO	6.53	0.000216735	0.89
AKDANNGNLQLR	P05455	P05455	SSB	3.5	0.000216938	0.89
DQNIFVQK	P53004	P53004	BLVRA	4.88	0.000217739	0.89
DSAAAVVVYDITNVNSFQQTTK	Q53S08;Q9H0N0	Q53S08	RAB6C	2.91	0.000217861	0.89
FQLFGSPSGQK	E7EQB2;E7ER44;P02788	E7EQB2	LTF	5.77	0.00021824	0.89
QNQIAVDEIR	P05164;J3QSF7	P05164	MPO	6.51	0.000218813	0.891
YLEEIATQMR	Q01813;A0A7I2V3Z0;B1APP6;H0Y3Y3	Q01813	PFKP	3.13	0.000219255	0.891
NTLYLQVNSLR	sp|A056675|abysis_56675;sp|A057061|abysis_57061;sp|A023210|abysis_23210;sp|A056017|abysis_56017;sp|A085704|abysis_85704	sp|A056675|abysis_56675		2.7	0.000219384	0.891
TTFQENTQSISVR	A0A8I5KRS9;A6NHR9;J3KTL8;A0A8I5KW02;A0A8I5KQZ7	A0A8I5KRS9	SMCHD1	2.94	0.000219407	0.891
TPTPEPAEVETR	Q9UHY1;F8W6G1	Q9UHY1	NRBP1	3.28	0.000219689	0.891
GLQPGTTDQDLVK	F8W1T6;Q15434;A0A1W2PQV1;F8VQS9	F8W1T6	RBMS2	2.8	0.000220382	0.891
QPLALNVAYR	B4DY09;Q12905	B4DY09	ILF2	3.77	0.000221344	0.891
NSYVAGQYDDAASYQR	P11413;E7EUI8;E7EM57;E9PD92	P11413	G6PD	2.87	0.000221399	0.891
LRAEAGLGALPR	Q9NR77;F5H4N4	Q9NR77	PXMP2	3.06	0.00022147	0.891
MELPER	M0QYG8;M0R1D2;O60234;M0R0C1;M0QYJ8;M0QXC2	O60234	GMFG	4.49	0.000221546	0.891
VAVVTYNNEVTTEIR	P12111	P12111	COL6A3	4.94	0.000222369	0.891
NQLTAMSSVLAK	Q14152	Q14152	EIF3A	5.17	0.000222382	0.891
LYLVSDVLYNSSAK	O15042;E7ET15	O15042	U2SURP	2.87	0.000222561	0.891
AENLLLDADMNIK	A0A7I2V3K2;E7ETY4;E9PC69;Q7KZI7;A0A7I2YQR3;A0A0A0MRU9;A0A7I2V3R3;F5H4F6;P27448;A0A7I2YQF7;A0A7I2V409;A0A7I2V2U9;A0A7I2V4K8;J3KNR0;A0A7I2V639;A0A7I2V5G3;A0A7I2V3B9;H0YJI9;A0A7I2V2N8;A0A7I2V3I9;H0YNV4;A0A7I2V549;A0A7I2V602;A0A7I2V4G7;A0A7I2YQF4;H0YKP9;A0A7I2V2E3;A0A7I2V4T2;A0A7I2V2I9;A0A7I2V3C6;A0A7I2V3P5;A0A7I2V4L1	E7ETY4	MARK2;MARK3	3.52	0.000222636	0.891
SQLEGLEESVR	O15031	O15031	PLXNB2	3.17	0.00022317	0.891
SLAMLGSSEDNTALSR	Q13596;H0YK42	Q13596	SNX1	2.97	0.000223275	0.891
SIAFPSIGSGR	O75367;B4DJC3	O75367	H2AFY	5.27	0.00022361	0.891
SLGDDISSETSGDFR	D6RA82;P12429;D6RFG5	P12429	ANXA3	5.06	0.000223719	0.891
TSVAYVTPGDSETAPVVTVTHR	Q9UIB8	Q9UIB8	CD84	3.53	0.000223812	0.891
QMEQVAQFLK	Q01995;H0YCU9	Q01995	TAGLN	3.68	0.00022387	0.891
AFFSEVER	Q9UQ80;F8VR77	Q9UQ80	PA2G4	5.78	0.000224293	0.891
EVDEGPSPPEQFTAVK	Q14331;E9PRR7	Q14331	FRG1	3.04	0.000224987	0.891
LPNLTHLNLSGNK	Q92688	Q92688	ANP32B	4.54	0.000225109	0.891
ISGLIYEETR	P62805	P62805	HIST1H4A	3.22	0.000225368	0.891
DNERPSGIPER	sp|A081267|abysis_81267;sp|A014674|abysis_14674;sp|A022709|abysis_22709;sp|A007349|abysis_7349	sp|A081267|abysis_81267		2.79	0.000225908	0.891
DGQPQVVPVEGSLR	A0A140TA33;A0A140T902;A0A140TA41;A0A140T9C0;P22105;A0A140TA52;A0A140T8Y3;A0A140T8Z8;A0A140T956;A0A3B3ISX9	A0A3B3ISX9	TNXB	3.06	0.000226035	0.891
VLANPGNSQVAR	Q14974;J3QR48	Q14974	KPNB1	5.47	0.00022671	0.891
VSSQNLVAIPVYVK	Q9Y2T2	Q9Y2T2	AP3M1	3.78	0.000226971	0.891
GTPLLAVR	Q8WZA9	Q8WZA9	IRGQ	2.67	0.000227277	0.892
LITAVVMK	D6REX3;O94979;D6RHZ5;H7BXG7;H0Y8V7;H0Y9K1;H0YAB3	D6REX3	SEC31A	4.75	0.000228207	0.892
VIVMSATLDAGK	O43143	O43143	DHX15	3.78	0.000229857	0.892
SGNEEVLADVR	Q6IA69;A0A0B4J216;E9PNF5	Q6IA69	NADSYN1	3.46	0.00023007	0.892
EKKEDLEFQAK	Q01831	Q01831	XPC	2.86	0.00023043	0.892
EVFGDTLNESRDPDRPPER	Q96CX2	Q96CX2	KCTD12	5.05	0.000230856	0.892
EILPFEK	Q9NWH9;H7C3F4	Q9NWH9	SLTM	3.05	0.000232382	0.892
[truncated: 4,259 more rows]

## Sheet: down
Sequence	Proteins	Leading_razor_protein	Gene_name	case_vs_control_ratio	case_vs_control_p.val	case_vs_control_p.adj
LFDFQGLQHQVAHVATQLEAAR	P45954	P45954	ACADSB	-10.4	2.27e-12	0.000223
LLQDSGAPDGTLNIIHGQHEAVNFICDHPDIK	Q02252	Q02252	ALDH6A1	-10.6	4.6e-12	0.000437
GILGYTEHQVVSSDFNSDTHSSTFDAGAGIALNDHFVK	P04406;E7EUT5	P04406	GAPDH	-11.4	5.09e-12	0.000459
IHMGSCAENTAK	A0A5F9ZHJ0;A0A5F9ZHD4;P24752;A0A5F9ZHL1;A0A5F9ZHJ7;A0A5F9ZI66	P24752	ACAT1	-10.7	1.48e-11	0.00259
GLTEGLHGFHVHEFGDNTAGCTSAGPHFNPLSR	P00441;H7BYH4	P00441	SOD1	-10.4	1.98e-11	0.00347
ALNALCDGLIDELNQALK	P30084	P30084	ECHS1	-10.6	2.1e-11	0.00366
VNFSPPGDTNSLFPGTWYLER	P54868	P54868	HMGCS2	-9.26	2.61e-11	0.00457
GDTNFYGK	Q02252;G3V4Z4	Q02252	ALDH6A1	-8.96	3.21e-11	0.00546
FENAFLSHVVSQHQALLGTIR	P25705	P25705	ATP5A1	-10.3	3.63e-11	0.00596
NIVSDCSAFVK	P33121;E7EPM6;B7Z3Z9;D6RER0;H0Y9Z9	P33121	ACSL1	-9.88	3.86e-11	0.0062
HIDSAYLYNNEEQVGLAIR	P17516	P17516	AKR1C4	-10.1	5.17e-11	0.00831
VTPGSTCAVFGLGGVGLSAVMGCK	P08319;D6R9K8;D6RIB1;H0Y9N0;D6RHZ6;V9HW50;P00325	V9HW50	ADH4;ADH1B;HEL-S-117	-10.5	5.19e-11	0.00834
VELNDGHFMPVLGFGTYAPPEVPR	P17516	P17516	AKR1C4	-10.6	5.89e-11	0.0093
LPTVTTVAVPAGYDWR	P21549	P21549	AGXT	-9.62	6.42e-11	0.00995
WSGPLSLQEVDEQPQHPLHVTYAGAAVDELGK	P30086	P30086	PEBP1	-10.4	8.68e-11	0.0136
MGALDVCPFIPVR	O95954;A0A0G2JQF2;B7WPK3	O95954	FTCD	-9.12	9.62e-11	0.0149
EVAFWTNLFAK	P23141;A0A140TA63;H3BQV8	P23141	CES1	-9.99	1.11e-10	0.0167
GYSFGHPSSVAGEVVFNTGLGGYPEAITDPAYK	P31327	P31327	CPS1	-10.4	1.13e-10	0.017
FNFLAPELPAVSEFSTSETMGHSADR	P55084;F5GZQ3	P55084	HADHB	-9.22	1.22e-10	0.018
FNFASDVLDHWADMEK	Q08AH3;E7EPS5;I3L2Y5;I3L438;Q68CK6;H3BNJ9;H3BM61;H3BQ84	Q68CK6	ACSM2A;ACSM2B	-8.86	1.45e-10	0.0202
VDHQTGPIVWGEPGTNGQHAFYQLIHQGTK	P06744;A0A2U3TZU2;K7EQ48;K7ESF4	P06744	GPI	-9.2	1.45e-10	0.0202
VCNLIDSGTK	Q02252;G3V4Z4	Q02252	ALDH6A1	-10.4	1.67e-10	0.0221
GTAELMQQK	Q93088;E5RJH0	Q93088	BHMT	-9.98	1.72e-10	0.0224
YHTVNGHNCEVR	P09651;A0A7I2V3R8;F8W6I7;A0A7I2V3W0;A0A7I2V2L6;A0A7I2YQX9;F8VZ49;A0A2R8Y4L2;F8VTQ5;H0YH80;A0A7I2V334;A0A7I2V5H0;A0A7I2V5T1	P09651	HNRNPA1	-9.06	1.82e-10	0.0231
LTTLVDADAEAFTAYLEAMR	O95954	O95954	FTCD	-9.47	1.84e-10	0.0232
TQAALVLDCLETR	O95954;A0A804HKA5;Q49AR5	O95954	FTCD	-9.11	1.89e-10	0.0235
IQFHNVKPEYLDAYNSLTEAVLPK	H7C2U6;F8WCR5;Q9BPW8	Q9BPW8	NIPSNAP1	-9.89	2.42e-10	0.0283
EVEAVIPDHCIFASNTSALPISEIAAVSK	H0YFD6;P40939;A0A2R8Y4F5	H0YFD6	HADHA	-9.13	2.53e-10	0.0292
YASICQQNGLVPIVEPEVIPDGDHDLEHCQYVTEK	P05062;A0A3B3IS80	P05062	ALDOB	-10.3	2.72e-10	0.0306
LGVHPLSCHGWVLGEHGDSSVPVWSGMNVAGVSLK	P00338	P00338	LDHA	-8.22	2.72e-10	0.0306
TQLMSDGTSR	P28332;Q8IUN7	P28332	ADH6	-8.67	2.88e-10	0.0317
DEAGHFLWPGFGENAR	H0YML5;Q16822	Q16822	PCK2	-9.18	2.9e-10	0.0318
VCNFLASQVPFPSR	Q99714	Q99714	HSD17B10	-7.89	2.98e-10	0.0323
IPAICDMPTELHIALLPPSQNSNTLYSSK	Q06278;H7BXF7;H7C3Q1	Q06278	AOX1	-8.2	3.05e-10	0.0327
DLGTQLAPIIQEFFSSEQYR	P46952;C9IY88	P46952	HAAO	-8.41	3.11e-10	0.0331
GFEGSFEELCR	P33121;E7EPM6;B7Z3Z9;H0Y9U7	P33121	ACSL1	-9.27	3.15e-10	0.0334
FTPPQPAEPWSFVK	P23141	P23141	CES1	-10.6	3.23e-10	0.0339
TGPLPPGPPPEIVIYQELR	Q14914;F2Z3J9	Q14914	PTGR1	-8.94	3.72e-10	0.037
NFTEVHPDYGSHIQALLDK	P04040	P04040	CAT	-10.1	3.8e-10	0.0375
LSEDCLYLNIYTPADLTK	P23141;Q9UKY3	P23141	CES1;CES1P1	-9.07	3.83e-10	0.0377
NTTGVTEEALK	A0A0D9SF54;A0A0D9SGF6;Q13813	Q13813	SPTAN1	-8.12	3.85e-10	0.0378
ASPSPTDPVVPAVPIGPPPAGFR	P11498;A0A494C016	P11498	PC	-8.31	4.19e-10	0.0396
LGLDSLCPFSPK	O95954;A0A0G2JQF2;B7WPK3	O95954	FTCD	-9.36	4.51e-10	0.0412
FTPPLEDSCFHYGFNSNYLK	P07099;B1AQP8	P07099	EPHX1	-9.21	4.71e-10	0.0421
GAGTVFDAFPDQVAIQLNDTHPALAIPELMR	P06737;E9PK47	P06737	PYGL	-8.72	5.01e-10	0.0434
GFQQILAGEYDHLPEQAFYMVGPIEEAVAK	P06576	P06576	ATP5B	-8.79	5.03e-10	0.0434
NTHEFVETASSGNPLDFFPILR	P05177	P05177	CYP1A2	-8.53	5.08e-10	0.0436
AEDGIVLDLPLYPAHPQDFHEVEDLIK	P30039;A0A0C4DFS0	P30039	PBLD	-8.11	5.42e-10	0.0449
EQWDTIEELIR	Q16698	Q16698	DECR1	-9.42	5.51e-10	0.0453
DGIEPGHIPGTVNIPFTDFLSQEGLEK	P25325	P25325	MPST	-9.08	5.7e-10	0.0459
LGAGYPMGPFELLDYVGLDTTK	A0A0D9SFP2;A0A1W2PNM1;A0A1W2PQ78;Q16836;E9PF18;A0A0A0MSE2;A0A804HLB5	Q16836	HADH	-9.62	5.88e-10	0.0465
FEGLAFPVIVGHEAAGIVESIGPGVTNVKPGDK	P08319;D6R9K8;D6RIB1	P08319	ADH4	-10.4	6.08e-10	0.0471
AEMDAAIASCK	Q02252	Q02252	ALDH6A1	-8.09	6.09e-10	0.0472
YSDLVPTGVPHAVTTDTK	P10632;B7Z1F5;G3V188;A0A0D9SG51	P10632	CYP2C8	-8.29	6.24e-10	0.0476
LAASEAATAISHQAIQILGGMGYVTEMPAER	P16219;E9PE82	P16219	ACADS	-8.94	6.39e-10	0.0481
SHMPYTDAVVHEIQR	P10632;B7Z1F5;G3V188;A0A0D9SG51;P33260;A0A087X0B3	P10632	CYP2C8;CYP2C18	-8.68	6.52e-10	0.0484
HAYGDQYR	O75874;C9J4N6	O75874	IDH1	-8.98	6.59e-10	0.0486
SLHDALCVLAQTVK	P78371;F5GWF6;F8VQ14	P78371	CCT2	-7.85	6.61e-10	0.0487
VAHALAEGLGVIACIGEK	P60174;U3KPZ0;U3KQF3	P60174	TPI1	-9.43	6.62e-10	0.0487
EGATLVCGGNQVPR	O75891	O75891	ALDH1L1	-8.25	6.72e-10	0.049
GTGGANIDPTFFLSR	P11509	P11509	CYP2A6	-7.78	6.74e-10	0.049
GLIAAICAGPTALLAHEIGFGSK	Q99497;K7ELW0;K7EN27	Q99497	PARK7	-8.22	6.76e-10	0.0491
NENTFLDLTVQQIEHLNK	A0A7I2YQ74;C9JNZ1;A0A7I2V4T0;C9JVG3;C9JQU9;Q16851;E7EUC7;C9JWG0	Q16851	UGP2	-7.85	7.27e-10	0.0509
YHTINGHNCEVK	A0A7I2V2R3;P51991;A0A7I2V5D8;A0A7I2V4J6;A0A7I2V4G0	A0A7I2V2R3	HNRNPA3	-8.25	7.42e-10	0.0514
GFGFPQAALITESCITEVAAK	Q06278	Q06278	AOX1	-7.76	7.89e-10	0.0529
ADVWETFQQR	Q9Y2P5	Q9Y2P5	SLC27A5	-8.12	8.03e-10	0.0533
VGLELIASENFASR	P34896;J3KRZ5;J3KRK5	P34896	SHMT1	-7.7	8.15e-10	0.0537
INPVCPADLVIDHSIQVDFNR	P21399	P21399	ACO1	-7.6	8.17e-10	0.0537
NLAQVSTNLLDFEVTALHTVYEETCR	O95954;A0A0G2JQF2;B7WPK3	O95954	FTCD	-9.1	8.25e-10	0.0539
ESGYNMIHFTPLQTLGLSR	P35573	P35573	AGL	-7.9	8.32e-10	0.0541
MEAIPCVVGDEEVWTSDVQYQVSPFNHGHK	P30038	P30038	ALDH4A1	-7.69	8.5e-10	0.0546
MDSPFLELWQSK	O94886;X6RI56	O94886	TMEM63A	-10.9	8.95e-10	0.0558
APHLVGPHLGLETGNGGGVINLNAFDPTLPK	Q96GK7;Q6P2I3;C9JGM0;C9J5B6	Q96GK7	FAHD2A;FAHD2B	-8.84	8.96e-10	0.0558
YVAAAFPSACGK	H0YML5;Q16822;H0YM31	Q16822	PCK2	-8.86	9.4e-10	0.0569
MLDLYSQISSVPIGYSHPALLK	H3BRN4;P80404;H3BNQ7	H3BRN4	ABAT	-9.52	9.49e-10	0.0571
DVNLRPEQLGDICVGNVLQPGAGAIMAR	P09110;C9JDE9;B4DVF4	P09110	ACAA1	-9.03	9.51e-10	0.0572
LCENIAGHLK	P04040	P04040	CAT	-10.3	9.56e-10	0.0573
SDEHVVSGNLVTPLPVILGHEAAGIVESVGEGVTTVKPGDK	P00326;A0A087WU81;A0A087WUC4	P00326	ADH1C	-11.3	9.62e-10	0.0574
ITSTIEDPSIFGHVEEMLK	A0A0B4J1R2;Q9H6R3	A0A0B4J1R2	ACSS3	-7.8	9.81e-10	0.0579
YFAEALGPLQSFQARPDDLLISTYPK	P50225;H3BRY5;H3BQX5;P50226;E9PKW4;E9PM76;E9PKR8	P50225	SULT1A1;SULT1A2	-8.94	9.93e-10	0.0581
VHAIQCDVRDPDMVQNTVSELIK	E5RJD2;Q16698;E5RFV2;E5RJG7	Q16698	DECR1	-9.12	1.01e-09	0.0585
ALELQGVMAAEAGDLSTALER	A6NLP5	A6NLP5	TTC36	-7.46	1.05e-09	0.0593
NHPEPTLDQLTDALGGNLCR	Q06278;C9J244	Q06278	AOX1	-8.09	1.06e-09	0.0595
ICPVETLVEEAIQCAEK	P30084	P30084	ECHS1	-10.2	1.07e-09	0.0597
ALAPTWEQLALGLEHSETVK	Q8NBS9	Q8NBS9	TXNDC5	-8.17	1.08e-09	0.0599
IVYQDLEPLILTIEESIQHNSSFKPER	Q06278	Q06278	AOX1	-10.4	1.11e-09	0.0604
VGADNHVLPLDCVTLQTFLAK	P35573	P35573	AGL	-7.62	1.12e-09	0.0607
WEYVPLGPFLGK	P16930	P16930	FAH	-8.39	1.14e-09	0.0611
TLTGTVIDSGDGVTHVIPVAEGYVIGSCIK	P61158;B4DXW1	P61158	ACTR3	-7.27	1.18e-09	0.0621
NHGLSDEHVFEVICPSIPGYGFSEASSK	P07099	P07099	EPHX1	-10.1	1.18e-09	0.062
CLAFHDISPQAPTHFLVIPK	P49773;D6REP8;D6RE99;H0YC49;D6RD60;A0A6Q8PGQ8	P49773	HINT1	-9.77	1.28e-09	0.0653
EAGFPPGVVNIVPGYGPTAGAAISSHMDIDK	P00352	P00352	ALDH1A1	-8.5	1.29e-09	0.0658
QGFIDLPEFPFGLEPR	Q93088;E5RJH0	Q93088	BHMT	-9.58	1.41e-09	0.0695
ILTVEDHYYEGGIGEAVSSAVVGEPGITVTHLAVNR	P29401	P29401	TKT	-7.73	1.45e-09	0.0707
CVSPEEFTEIMNQR	P54868	P54868	HMGCS2	-8.83	1.47e-09	0.0713
ATVAPEDVSEVIFGHVLAAGCGQNPVR	Q9BWD1	Q9BWD1	ACAT2	-8.26	1.52e-09	0.0727
MLALGITGPEGHELCRPEAVEAEATLR	Q14117	Q14117	DPYS	-8.33	1.63e-09	0.0756
IDIPSFDWPIAPFPR	H3BRN4;P80404;H3BNQ7	H3BRN4	ABAT	-8.45	1.69e-09	0.0771
SLEECLEK	Q9UBR1;Q6AHZ8;F8WC94	Q9UBR1	UPB1;DKFZp779O1248	-8.43	1.71e-09	0.0774
ATFHTPFSHLGQSPEGCSSYTFPK	A0A0C4DGA2;O75521	A0A0C4DGA2	ECI2	-8.27	1.73e-09	0.0779
SSGGFVWACK	P48735;H0YL11	P48735	IDH2	-7.99	1.78e-09	0.0791
PSETPQAEVGPTGCPHR	P35520;C9JMA6	P35520	CBS	-8.15	1.79e-09	0.0794
CLGLTEAQTR	P31327;A0A669KBF2	P31327	CPS1	-10.3	1.83e-09	0.0802
VMDRPGNYVEPTIVTGLGHDASIAHTETFAPILYVFK	A0A1B0GTY9;A0A1B0GW77;P49419;A0A1B0GTG2;A0A1B0GUA1;A0A1B0GW82;A0A1B0GTJ4;A0A1B0GV49	A0A1B0GW77	ALDH7A1	-8.96	1.84e-09	0.0806
TMLITHMQDLQEVTQDLHYENFR	B5MCX3;Q15019	Q15019	37500	-6.93	1.88e-09	0.0815
LAIEAGFHHIDSAHVYNNEEQVGLAIR	P52895;B4DK69;S4R3P0	P52895	AKR1C2	-8.87	1.94e-09	0.0827
MWEELPEVVR	Q02338;E9PCG9	Q02338	BDH1	-7.86	1.94e-09	0.0827
NPWSMDENLMHISYEAGILENPK	P00966	P00966	ASS1	-9.42	1.98e-09	0.0836
LNDHFPLVVWQTGSGTQTNMNVNEVISNR	P07954;A0A804HI24;A0A804HKE6	P07954	FH	-7.8	1.99e-09	0.0838
LLEAGNFICQALNR	P35914;H0Y2L7	P35914	HMGCL	-7.79	2.02e-09	0.0843
LLDHLFANVIPK	Q9UI17;Q8TCC6	Q9UI17	DMGDH	-7.22	2.04e-09	0.0847
LHLSGIDANPNALFPPVEFPAPR	P49327;A0A0U1RQF0	P49327	FASN	-8.58	2.05e-09	0.0851
QDVSPFNVVAWHGNYTPYK	Q93099;H7C576	Q93099	HGD	-8.95	2.05e-09	0.085
IIVDTYGGWGAHGGGAFSGK	P31153;Q00266	Q00266	MAT2A;MAT1A	-8.07	2.05e-09	0.085
STWLILHHK	P00167	P00167	CYB5A	-9.65	2.12e-09	0.0864
GPHLVQSDGTVPFWAHAGNAIPSSDQIR	P49257	P49257	LMAN1	-7.6	2.19e-09	0.0877
APLVCLPVFVSR	A0A1W2PRB8;E9PJU8;Q9H0W9;A0A087WT99;E9PQS1	A0A1W2PRB8	C11orf54	-7.94	2.22e-09	0.0883
EWHHFLVVNMK	P30086	P30086	PEBP1	-10.1	2.23e-09	0.0884
FQSAAIGALQEASEAYLVGLFEDTNLCAIHAK	K7EK07;P84243	K7EK07	H3F3B;H3F3A	-9.23	2.24e-09	0.0885
IPDVPGFSWVTPCISAK	P05089;A0A5F9ZGN6	P05089	ARG1	-7.71	2.3e-09	0.0897
NLIEWLNK	Q96DG6	Q96DG6	CMBL	-8.61	2.4e-09	0.0914
FVTTEFEPCFDAADFIR	A0A6Q8PHC6;P50440;A0A6Q8PGA2;A0A6Q8PFC6	A0A6Q8PHC6	GATM	-9.54	2.45e-09	0.0923
ALLDSLQLGPDSLTVHLIHEVTK	Q14697	Q14697	GANAB	-7.79	2.53e-09	0.0936
LLLTNDPLEAAHGGNVLITDTWISMGQEEEK	P00480	P00480	OTC	-8.05	2.57e-09	0.0942
GWDENVYYTVPLVR	Q9BPW8	Q9BPW8	NIPSNAP1	-7.19	2.6e-09	0.0945
YGLSAHPVAPQMFGYAGK	P22307;E9PLD1;H0YCB0	P22307	SCP2	-8.91	2.65e-09	0.0953
TLSTIATSTDAASVVHSTDLVVEAIVENLK	A0A0D9SFP2;A0A1W2PNM1;A0A804HKJ2;A0A1W2PRT2;A0A804HJK7;A0A1W2PQ55;Q16836;E9PF18;A0A0A0MSE2;A0A1W2PQV5;A0A804HJW7;A0A1W2PP40;A0A1W2PQC2	Q16836	HADH	-9.24	2.69e-09	0.096
FSGGYPALMDCMNK	H7C2U6;Q9BPW8	Q9BPW8	NIPSNAP1	-7.1	2.74e-09	0.0966
AGTFQAFEQFGQQLLAHGHYASPEIK	A0A0D9SF54;A0A0D9SGF6;Q13813	Q13813	SPTAN1	-8.24	2.75e-09	0.0968
HNVMISTEWAAPNVLR	H0Y532;Q13228;A6PVX1	Q13228	SELENBP1	-8.07	2.78e-09	0.0972
WDAWNALGSLPK	A0A0C4DGA2;O75521;F1LLU7;F8WAW4;F8W6J1;C9JB63	A0A0C4DGA2	ECI2	-6.94	2.84e-09	0.0981
LINYHQEQAVNCLLGNVFYER	P35573	P35573	AGL	-7.36	2.88e-09	0.0986
IGPSEVENALMEHPAVVETAVISSPDPVRGEVVK	Q08AH3;F5GWL3	Q08AH3	ACSM2A	-7.4	2.9e-09	0.0988
TINGTFFGGWK	P08319	P08319	ADH4	-10.3	2.91e-09	0.099
DFIDSFLIR	P11509;Q16696	P11509	CYP2A6;CYP2A13	-8.51	2.92e-09	0.0991
MYHHTIPVISLYSLR	P21549	P21549	AGXT	-8.33	2.94e-09	0.0994
VTPGSTCAVFGLGGVGLSAIMGCK	P07327	P07327	ADH1A	-8.42	2.97e-09	0.0998
CAADLGLNK	P49773	P49773	HINT1	-8.39	3.03e-09	0.1
TLETLLLPTANISDVDPAHAQHYQDVLYHAK	Q13576;F5H7S7;D6R939;E9PDT6;D6RDK8;D6RGC6;D6R999	Q13576	IQGAP2	-7.97	3.03e-09	0.1
ESLALIAEQGLENSWR	P21549	P21549	AGXT	-9.09	3.08e-09	0.101
TFTAWCNSHLR	F5GXS2;K7EP19;H7C144;O43707;A0A804HII9;A0A804HK61;A0A7I2V4Y4;A0A804HLF4;A0A804HJQ9;G3V2N5;A0A804HIY0;A0A804HIN7;P12814;P35609;A0A494C1A0;A0A804HI95;A0A804HKG0;A0A494C033;A0A494C166;A0A494C0Q3;Q08043	O43707	ACTN4;ACTN1;ACTN2;ACTN3	-7.22	3.12e-09	0.102
VGDFNESTYYMEGNLGHPVFQTQFGR	Q9UBR1	Q9UBR1	UPB1	-8.45	3.13e-09	0.102
TVYTFVGPPECVVEGALNAAR	O95954;A0A0G2JQF2;B7WPK3	O95954	FTCD	-8.74	3.15e-09	0.102
LNLDPLITHTLNLDK	P28332	P28332	ADH6	-8.61	3.16e-09	0.102
LGDPAEYAHLVQAIIENPFLNGEVIR	Q99714	Q99714	HSD17B10	-8.99	3.24e-09	0.103
NTPVYVSSPTWENHNAVFSAAGFK	P17174	P17174	GOT1	-8.22	3.33e-09	0.104
GIHSAIDASQTPDVVFASILAAFSK	F8W1A4;P54819;F8VY04;A0A5K1VW67	F8W1A4	AK2	-9.34	3.35e-09	0.104
GLTSELQALGK	Q7Z5P4	Q7Z5P4	HSD17B13	-8.87	3.35e-09	0.104
AIAIAAGVPVVPGTDAPITSLHEAHEFSNTYGFPIIFK	P11498;A0A494C016;A0A494C101;A0A494C0T2;E9PRE7	P11498	PC	-8.43	3.42e-09	0.105
TFIIGELHPDDRPK	P00167;J3KNC7	P00167	CYB5A	-10.3	3.44e-09	0.105
FVSAIEGMHPNQEDHETFVDINPLTGIILK	Q14108;A0A1W2PS43;A0A1W2PRS1;A0A1W2PPX5;A0A1W2PQR6;A0A1W2PQB7;A0A1W2PPU6;A0A1W2PRF6	Q14108	SCARB2	-7	3.45e-09	0.105
ESGYMHIQCTKPDTVGSALNDSPVGLAAYILEK	P07099	P07099	EPHX1	-8.69	3.46e-09	0.105
SVVEFLQGYIGVPHGGFPEPFR	P11498	P11498	PC	-8.19	3.53e-09	0.106
SQVTNYLGIEWMR	A0A6Q8PHC6;P50440;A0A6Q8PGA2;A0A6Q8PFC6	A0A6Q8PHC6	GATM	-8.94	3.63e-09	0.107
FSLDALITHVLPFEK	D6RHZ6;V9HW50;P00325;P07327	V9HW50	ADH1B;HEL-S-117;ADH1A	-11.4	3.64e-09	0.107
LCQPEGIHICDGTEAENTATLTLLEQQGLIR	Q16822;H0YM31	Q16822	PCK2	-8	3.65e-09	0.107
ATENTVNPCPDDTLISFLPLAHMFER	P33121;E7EPM6;B7Z3Z9;D6RER0	P33121	ACSL1	-8.33	3.7e-09	0.108
HGEEVTPEDVLSAAMYPDVFAHFK	P11498	P11498	PC	-8.28	3.72e-09	0.108
VLNQVADLLEQSLEEFAQAESK	Q9H2A2	Q9H2A2	ALDH8A1	-7.56	3.76e-09	0.108
FLYACGFASHPNEELLR	E9PBP6;P55157	P55157	MTTP	-7.26	3.8e-09	0.109
AHQDFGYFYGSSYVAAPDSSR	Q9UBR1	Q9UBR1	UPB1	-8.49	3.89e-09	0.11
IVGAPMHDLLLWNNATVTTCHSK	P11586;V9GYY3;F5H2F4;V9GZ78	P11586	MTHFD1	-8.21	3.92e-09	0.11
VQELGLSAPLTVLPTITCGHTIEILR	P35520;H7C2H4	P35520	CBS	-7.18	4e-09	0.111
GYESDMNWEK	Q06278;H7BXF7	Q06278	AOX1	-7.05	4.02e-09	0.111
SLQDHTPLPGIIIGDIGPK	Q99424;C9J0G0	Q99424	ACOX2	-8.16	4.05e-09	0.111
YALQMEQLNGILLHLESELAQTR	F8VZY9;P05783	P05783	KRT18	-10.1	4.13e-09	0.112
EAGFPPGVVNIVPGFGPTAGAAIASHEDVDK	P05091	P05091	ALDH2	-8.48	4.16e-09	0.112
VLLVSPELQAAVEEILPSLK	O14975	O14975	SLC27A2	-8.42	4.16e-09	0.112
DIVLVAHSALGTQR	P17516	P17516	AKR1C4	-7.28	4.21e-09	0.112
NGPVEGAFSVYSDFLLYK	A0A7I2V668;P07858;E9PHZ5;A0A7I2V440;A0A7P0NGZ6;A0A7I2YQK9;E9PR21;E9PQM1;E9PSG5;A0A7I2V4Z9;A0A7I2V367	P07858	CTSB	-7.9	4.26e-09	0.113
GEGMSQAATICK	P16930;H3BNP8	P16930	FAH	-8.85	4.28e-09	0.113
VYGTVFHINHGNPFNLK	Q6IB77	Q6IB77	GLYAT	-9.5	4.48e-09	0.115
NNLPTAISDWLYVK	P31513	P31513	FMO3	-7.69	4.5e-09	0.116
KEPEAFDWSPVVTYVCDLEGNR	P40261	P40261	NNMT	-7.58	4.51e-09	0.116
DEGWLAEHMLILGITSPAGK	H0YML5;Q16822;H0YM31	Q16822	PCK2	-8.77	4.53e-09	0.116
GASAINWTLIHGDK	O75891;C9IZ36;C9JYZ6;C9JY00	O75891	ALDH1L1	-7.04	4.61e-09	0.117
VDTVNHLADELINSGHSDAATIAEWK	A0A087WUZ3;Q01082	Q01082	SPTBN1	-7.48	4.66e-09	0.117
KLDSLTTSFGFPVGAATLVDEVGVDVAK	H0YFD6;P40939;A0A2R8Y4F5	H0YFD6	HADHA	-7.93	4.74e-09	0.118
QAGSDRPFTLDDLQYMIFHTPFCK	P54868	P54868	HMGCS2	-8.88	4.79e-09	0.119
SPILLGSLAHQIYR	P31937	P31937	HIBADH	-8.98	4.84e-09	0.12
LADLMEQHQEELATIEALDAGAVYTLALK	O75891	O75891	ALDH1L1	-7.92	4.92e-09	0.12
DACQTLLK	Q06278	Q06278	AOX1	-8.28	5.02e-09	0.122
LGISNHTHVVVYDGEHLGSFYAPR	Q16762;B1AH48	Q16762	TST	-9.05	5.09e-09	0.122
IQEEAGFLIDALR	P11509;Q16696	P11509	CYP2A6;CYP2A13	-8.78	5.14e-09	0.123
AVLEALGSCLNNK	P34896;J3KRZ5;J3KRK5	P34896	SHMT1	-8.85	5.16e-09	0.123
YYGGTEFIDELETLCQK	P34896;J3KRZ5	P34896	SHMT1	-8.48	5.18e-09	0.123
LLEVPVMLTEQYPQGLGPTVPELGTEGLRPLAK	Q96AB3;K7EKW4;K7ENV7	Q96AB3	ISOC2	-7.64	5.38e-09	0.125
LHVVGAPGGQSLSLSLDDLHNFPR	P51687	P51687	SUOX	-7.77	5.41e-09	0.126
SPLIIFADCDLNK	O75891	O75891	ALDH1L1	-8.41	5.54e-09	0.127
GYEEWLLNEIR	F5GXS2;H7C144;O43707;A0A804HII9;A0A804HK61;A0A7I2V4Y4;A0A804HLF4;A0A804HIN7;A0A804HL31;P12814;P35609;A0A494C1A0;A0A804HI95;A0A494C060	O43707	ACTN4;ACTN1;ACTN2	-7.87	5.63e-09	0.128
DLPEHAVLK	Q00839;A0A1W2PPS1;A0A1X7SBS1;A0A1W2PP35;Q5RI18;A0A1W2PPH7;A0A1W2PPL4;A0A1W2PQL0;A0A1W2PP34;A0A1W2PQ74;A0A1W2PRZ7;A0A1W2PQD4	Q00839	HNRNPU	-8.01	5.69e-09	0.129
EAESCDCLQGFQLTHSLGGGTGSGMGTLLLSK	Q3ZCM7;A0A075B736;Q5SQY0	Q3ZCM7	TUBB8	-7.25	5.73e-09	0.129
GVSVDECVLCAQAFGQR	O95954;A0A0G2JQF2;B7WPK3	O95954	FTCD	-8.23	5.81e-09	0.13
AGFALDEGIANPTDAFTVFYSER	C9JMV9;Q03154;A0A1B0GW23;A0A1B0GU86;A0A1B0GV31;C9JYZ0;F8WC59	Q03154	ABHD14A-ACY1;ACY1	-7.75	6.09e-09	0.132
FAGLHFFNPVPVMK	A0A0D9SFP2;A0A1W2PNM1;A0A804HKJ2;A0A1W2PRT2;Q16836;E9PF18;A0A0A0MSE2;A0A1W2PQV5;A0A804HJW7;A0A1W2PQC2	Q16836	HADH	-9.13	6.21e-09	0.133
ELASQPDVDGFLVGGASLKPEFVDIINAK	P60174	P60174	TPI1	-8.97	6.32e-09	0.134
DTTLNGFYIPK	P05177	P05177	CYP1A2	-7.53	6.39e-09	0.135
LYLEGTGINPVPVDLHEQQLSLNQHNR	B7Z8V7;Q4G0N4;A0A0C4DGV3	Q4G0N4	NADK2	-8.45	6.53e-09	0.136
NGNPNGEGLPHWPEYNQK	P23141;A0A140TA63;H3BQV8	P23141	CES1	-10.6	6.56e-09	0.136
GIYETPAGTILYHAHLDIEAFTMDR	P00966	P00966	ASS1	-9.45	6.62e-09	0.137
VILHPEFLSSTSPLLPMDYEEFVR	P54840	P54840	GYS2	-7.27	6.71e-09	0.138
RAEDGIVLDLPLYPAHPQDFHEVEDLIK	P30039;A0A0C4DFS0	P30039	PBLD	-9.08	6.83e-09	0.139
CPEALFQPSFLGMESCGIHETTFNSIMK	A0A2R8Y793;I3L4N8;P60709;E7EVS6;P63261;A0A804GS07;A0A6Q8PFE4	P60709	ACTG1;ACTB	-9.37	6.85e-09	0.139
LYSNAYLNDLAGCIK	P00352;Q5SYQ9;Q5SYQ8;Q5SYQ7	P00352	ALDH1A1	-9.47	6.89e-09	0.139
SLGVAAEGLPDQYADGEAAR	Q14749	Q14749	GNMT	-7.92	6.96e-09	0.14
LSGTEAHVLGLVNHAVAQNEEGDAAYQR	Q86YB7;F6RJU0;F5GWU3	Q86YB7	ECHDC2	-7.66	7.23e-09	0.142
LNDGHFMPVLGFGTYAPPEVPR	A0A0A0MSS8;P42330	A0A0A0MSS8	AKR1C3	-8.88	7.25e-09	0.142
LIALSIDSVEDHLAWSK	P30041	P30041	PRDX6	-8.78	7.31e-09	0.142
HIPGAAFFDIDQCSDR	P25325;B1AH49	P25325	MPST	-7.37	7.5e-09	0.144
VDLSQPLIATCR	Q16762	Q16762	TST	-7.72	7.57e-09	0.144
VLILGSGGLSIGQAGEFDYSGSQAVK	P31327	P31327	CPS1	-8.1	7.58e-09	0.144
FCQQHDIVITAYSPLGTSR	P51857	P51857	AKR1D1	-7.63	7.6e-09	0.144
VMPYVDILFGNETEAATFAR	P55263;A0A5K1VW54;A0A5F9ZH31;A0A5F9ZHJ1;A0A5F9ZGZ8;A0A5K1VW94	P55263	ADK	-6.39	7.64e-09	0.145
WDAWNELK	P07108;B8ZWD1	P07108	DBI	-8.67	7.73e-09	0.145
TLLEGSGLESIISIIHSSLAEPR	P49327;A0A0U1RQF0	P49327	FASN	-9.03	7.75e-09	0.145
NDPPMEAAGFTAQVIILNHPGQISAGYAPVLDCHTAHIACK	P68104;A0A7I2V5N4;A0A7I2V659;A0A087WVQ9;A0A087WV01	P68104	EEF1A1	-8.87	7.78e-09	0.146
VLVVGLGNSGCDIATELSR	P31513;V9GZ60	P31513	FMO3	-8.18	7.87e-09	0.146
THQIEAVPTSSASDGFK	P22307;H0YF61;H0YD06	P22307	SCP2	-7.3	7.88e-09	0.146
LPDNVTFEEGALIEPLSVGIHACR	Q00796;A0A6I8PIS1	Q00796	SORD	-8.64	7.9e-09	0.146
TPGTWNHITDQIGMFSFTGLNPK	P17174	P17174	GOT1	-8.12	8.03e-09	0.147
VDLNSNGFICDYELHELFK	P13797;U3KQI3	P13797	PLS3	-7.29	8.14e-09	0.148
GTVLLADNVICPGAPDFLAHVR	P21964;A0A7I2V370	P21964	COMT	-7.72	8.17e-09	0.148
GTGELTQLLNSLCTAVK	P09467;A0A804HJK9	P09467	FBP1	-8.64	8.31e-09	0.149
HPDSDLNPILAVGNCTLNLLSK	Q06278	Q06278	AOX1	-7.9	8.34e-09	0.149
VMTIAPGLFGTPLLTSLPEK	Q99714	Q99714	HSD17B10	-8.79	8.36e-09	0.149
MCHPSIEGFTPR	P31327;A0A669KBF2	P31327	CPS1	-8.01	8.46e-09	0.15
VDLTPIYGLTMK	P05177	P05177	CYP1A2	-7.51	8.48e-09	0.15
GVMLAVDAVIAELK	P10809;A0A7I2V599;A0A7I2V2X6;A0A7I2V5M1;A0A7I2V5K3;A0A7I2YQ71;A0A7I2V369;E7EXB4;E7ESH4	P10809	HSPD1	-7.88	8.48e-09	0.15
VGSFCLSEAGAGSDSFALK	P45954	P45954	ACADSB	-8.1	8.52e-09	0.15
TFSHELSDFGLESTAGEIPVVAIR	P30101;A0A8I5KT88;A0A8I5KW33;A0A8I5KS72;A0A8I5KNU9;A0A8I5KW00;A0A8I5QKQ5;A0A8I5KXC9;A0A8I5KPY2;A0A8I5KRV3;A0A8I5KYJ6;A0A8I5KXE2;A0A8I5KTA1	P30101	PDIA3	-8.55	8.53e-09	0.15
NCMSEFMGLIR	Q93099	Q93099	HGD	-8.51	8.54e-09	0.15
INWDQPAEAIHNWIR	O75891	O75891	ALDH1L1	-8.17	8.55e-09	0.151
YIDLLPTSLPHAVTCDIK	P11712	P11712	CYP2C9	-8.03	8.59e-09	0.151
AGWTIITPPTPIIPDDHPLWMSSK	A0A6Q8PHC6;P50440;A0A6Q8PGA2	A0A6Q8PHC6	GATM	-8.54	8.69e-09	0.151
LQSTFVFEEIGR	A0A2R8Y7L2;P51659;E7EPL9;A0A804HK65;A0A2R8YD50;E7ET17;A0A804HIR1	P51659	HSD17B4	-7.68	8.75e-09	0.152
TFPGFFSPMLGEFVSETESR	P02671	P02671	FGA	-7.6	8.77e-09	0.152
NYPAVIIQEPLVLTEPTR	Q9UI17	Q9UI17	DMGDH	-7.6	8.89e-09	0.153
GGSLIEAFETWR	Q14117	Q14117	DPYS	-8.19	8.95e-09	0.153
LHAVNAEECNVLQGR	A0A0C4DGA2;O75521	A0A0C4DGA2	ECI2	-7.83	9.01e-09	0.153
VLGAHILGPGAGEMVNEAALALEYGASCEDIAR	P09622;E9PEX6	P09622	DLD	-6.63	9.05e-09	0.153
GDTPSSCCIINNSNGNR	C9JDL1;P50053	P50053	KHK	-7.89	9.16e-09	0.154
VYVPTGFSAFPFELLHTPEK	P07099	P07099	EPHX1	-9.18	9.23e-09	0.154
ELLELGSNVVIASR	Q9BY49;B4DJS2	Q9BY49	PECR	-6.46	9.34e-09	0.155
WVDPNSPVLLEDPVLCALAK	A0A0A0MSS8;P42330;S4R3Z2	A0A0A0MSS8	AKR1C3	-8.5	9.42e-09	0.155
EQGYDVIAYLANIGQK	P00966;Q5T6L6;Q5T6L5	P00966	ASS1	-8.77	9.46e-09	0.156
FGVPLGYGGPHAAFFAVR	P23378;A0A1W2PPE1	P23378	GLDC	-7.63	9.52e-09	0.156
IVKPNGEKPDEFESGISQALLELEMNSDLK	P62081;B5MCP9;A0A2R8Y623	P62081	RPS7	-8.33	9.52e-09	0.156
SLGQWLQEEK	P31327	P31327	CPS1	-9.01	9.61e-09	0.156
IAVIGQSLFGQEVYCHLR	O75891;C9IZ36;C9JYZ6;C9JY00;D6RFJ7;F2Z324;F8WC34	O75891	ALDH1L1	-8.41	9.87e-09	0.158
AWRDPDEPVLLEEPVVLALAEK	P14550	P14550	AKR1A1	-8.01	9.96e-09	0.158
ETYGQQYFDALYNIMK	O14756	O14756	HSD17B6	-7.52	1e-08	0.158
GVPLVYEAFNWR	Q16822;H0YM31	Q16822	PCK2	-8.31	1e-08	0.159
HFVTISSPLATQIPQAVGAAYAAK	F5H5P2;P12694;F5GXU9;H0YH31	F5H5P2	BCKDHA	-7.06	1.01e-08	0.159
GSITSVQAIYVPADDLTDPAPATTFAHLDATTVLSR	H0YI37;P06576;H0YH81	P06576	ATP5B	-7.94	1.03e-08	0.16
DLAGCIHGLSNVK	P48735	P48735	IDH2	-8.21	1.04e-08	0.16
DADLWSSHDK	P34896;J3KRZ5;J3KRK5	P34896	SHMT1	-7.99	1.05e-08	0.161
QLNIIQNAEAVHFFCNYEESR	H3BRN4;P80404;H3BNQ7;H3BPW8;H3BMJ9	H3BRN4	ABAT	-8.06	1.06e-08	0.161
SLHDPDGLVATYISEVHEHDGHLYLGSFR	Q9HDC9;H0Y512	Q9HDC9	APMAP	-7.11	1.06e-08	0.161
MFGIPVVVAVNAFK	A0A494C1T2;P11586;V9GYY3;F5H2F4;V9GZ78	P11586	MTHFD1	-6.94	1.06e-08	0.161
AVTNHSVYCSTK	J3KRZ4;J3KS22;J3QL34;J3QS45;Q7Z4W1;J3QS36	Q7Z4W1	DCXR	-8.23	1.07e-08	0.162
NYDHILSTGCAPPGK	Q14749	Q14749	GNMT	-8.32	1.07e-08	0.162
TNWFEPVGSEYK	Q9UI17;Q8TCC6	Q9UI17	DMGDH	-6.48	1.08e-08	0.162
ELSENSQQAANVLSGACGLQR	Q08AH3;F5GWL3;E7EPS5;I3L2Y5;I3L438;I3L339	Q08AH3	ACSM2A	-7.3	1.09e-08	0.163
EHPVLALPGAPAQFPVLEEHRPLQK	Q9H488	Q9H488	POFUT1	-7.07	1.09e-08	0.162
TQTSDPAMLPTMIGLLAEAGVR	A0A286YF22;O43175;A0A286YFA2	A0A286YF22	PHGDH	-7.99	1.1e-08	0.163
IQIIATSLCHTDATVIDSK	P08319;D6R9K8;D6RIB1	P08319	ADH4	-8.49	1.12e-08	0.164
VLDFEHFLPMLQTVAK	F8VPF3;G3V1V0;F8W1R7;B7Z6Z4;G8JLA2;F8VZU9;F8W180;P60660;J3KND3;G3V1Y7	P60660	MYL6	-6.87	1.12e-08	0.164
TQMYHALLK	Q06278	Q06278	AOX1	-8.51	1.13e-08	0.165
VLDGLHNELQTIGFQIETIGK	O60701	O60701	UGDH	-7.74	1.13e-08	0.165
SIVDAYVLLNLGDSVTTDHISPAGNIAR	P21399	P21399	ACO1	-7.64	1.14e-08	0.165
ISLLLDPGSFVESDMFVEHR	E9PDR0;P05166;C9JQS9;E7EX59;E7ETT1;E7ETT4;E7EUY3;F8WBI9;E7ENC1;H7C5C9;C9JVY9	E9PDR0	PCCB	-7.7	1.17e-08	0.166
DCLIPMGITSENVAER	P09110;C9JDE9;H0Y4D4	P09110	ACAA1	-7.84	1.18e-08	0.167
EFANIHPFVPLDQAQGYQQLFR	P23378	P23378	GLDC	-7.28	1.2e-08	0.168
YALNHPDTVEGLVLINIDPNAK	G3V4S9;G3V5H8;A0A0U1RR50;G3V5G0;G3V5B7;G3V271;H0YJ56;G3V578;H0YJT9;G3V5L7;Q9UN36;G3V2I9;G3V5S0;G3V383;G3V392;G3V2A6	Q9UN36	NDRG2	-8.12	1.2e-08	0.167
METYCSSGSTDTSPVIDAVTHALTATTPYTR	Q02338;E9PCG9	Q02338	BDH1	-7.06	1.21e-08	0.168
MDQNQHLNK	Q9Y6L6	Q9Y6L6	SLCO1B1	-6.85	1.21e-08	0.168
YYGGAEVVDEIELLCQR	P34897;G3V5L0;G3V540;G3V2W0;G3V241;G3V3Y8;G3V4T0;G3V2E4;G3V4W5;G3V4X0	P34897	SHMT2	-7.12	1.22e-08	0.168
FNLDALVTHTLPFDK	P08319	P08319	ADH4	-10.6	1.23e-08	0.169
AAEEIGIK	P11586;V9GYY3;F5H2F4;A0A8C8UXK2	P11586	MTHFD1	-8.08	1.24e-08	0.169
APVAGTCYQAEWDDYVPK	P30086	P30086	PEBP1	-9.02	1.25e-08	0.17
SPCIVLADADLDNAVEFAHHGVFYHQGQCCIAASR	P00352	P00352	ALDH1A1	-8.07	1.26e-08	0.17
ANEAYPCPCDIGHR	Q96DG6	Q96DG6	CMBL	-7.69	1.28e-08	0.171
MGGSSGALYGLFLTAAAQPLK	Q3LXA3;H0YCY6;I3L252	Q3LXA3	DAK;TKFC	-7.13	1.28e-08	0.171
IYLTADNLVLNLQDESFTR	Q99623;J3KPX7	Q99623	PHB2	-6.81	1.28e-08	0.171
LDIDPETITWQR	A0A494C1T2;P11586;V9GYY3;F5H2F4;V9GZ78	P11586	MTHFD1	-8.13	1.29e-08	0.171
YEFEQQR	Q4G0N4	Q4G0N4	NADK2	-7.45	1.29e-08	0.171
LIDAETTAAAWPNVAAVSITGR	Q3LXA3;H0YCY6	Q3LXA3	DAK;TKFC	-6.92	1.3e-08	0.172
VGEALVSHPEVPLISFTGSQPTAER	Q9H2A2	Q9H2A2	ALDH8A1	-7.65	1.32e-08	0.172
ILNHVLQHAEPGNAQSVLEAIDTYCEQK	F8WBW9;P21964;A0A7I2V370;E7EMS6;E7EUU8;A0A7I2V3G7;H7BZ45	P21964	COMT	-8.21	1.33e-08	0.173
EGMAALQSDPWQQELYR	P49748;G3V1M7	P49748	ACADVL	-7.01	1.36e-08	0.174
ASMGTLAFDEYGRPFLIIK	P48643;E7ENZ3;D6RIZ7	P48643	CCT5	-7.06	1.36e-08	0.174
KFSLDALITHVLPFEK	D6RHZ6;V9HW50;P00325;P07327	V9HW50	ADH1B;HEL-S-117;ADH1A	-12.5	1.37e-08	0.174
SIYHFGNTSTFCEYTVIK	P28332;Q8IUN7	P28332	ADH6	-7.53	1.39e-08	0.175
VDINAPDVDVQGPDWHLK	Q09666	Q09666	AHNAK	-7.19	1.39e-08	0.175
VPTADLEDVLPLAEDITNILSK	D6RF35;P02774;D6RBJ7	D6RF35	GC	-7.59	1.39e-08	0.175
MHSVGICGSDVHYWEYGR	Q00796;A0A6I8PIS1;H0YKB3	Q00796	SORD	-8.9	1.39e-08	0.175
DVTTSVLIVNNK	Q14749	Q14749	GNMT	-7.5	1.4e-08	0.175
ILCEELGAPANSAVNCVPLEDFGGHHPDPNLTYAADLVETMK	P36871;A0A3B3ITK7	P36871	PGM1	-6.66	1.4e-08	0.175
IECVLPENCR	Q15493	Q15493	RGN	-7	1.41e-08	0.176
VVTTPAFMCETALHYIHDGIGAMVR	A0A096LPI6;A0A096LNH5;P0DPI2;A0A0B4J2D5	P0DPI2		-7.08	1.42e-08	0.176
GQVQEVGWHDVAGWLGR	P17858	P17858	PFKL	-5.93	1.46e-08	0.177
TVIGDHGDELFSVFGAPFLK	P23141	P23141	CES1	-10.6	1.5e-08	0.179
QLDGVPATIDVLPEIVEAVEGK	Q9UJM8	Q9UJM8	HAO1	-7.9	1.5e-08	0.179
HYFIEVNSR	P11498;A0A494C016;A0A494C101;A0A494C0T2;E9PRE7	P11498	PC	-6.88	1.5e-08	0.178
QGLYELSASNFELHVAQGDHFIK	Q8NBS9	Q8NBS9	TXNDC5	-7.4	1.5e-08	0.179
YGPVFTIHLGPR	P11509;Q16696	P11509	CYP2A6;CYP2A13	-7.62	1.51e-08	0.179
EALEALVPVTIEVEVPFDLHR	A0A024R4E5;Q00341;H0Y394	A0A024R4E5	HDLBP	-6.42	1.51e-08	0.179
IPLSDGNSIPIIGLGTYSEPK	P51857;C9J3U1	P51857	AKR1D1	-7.8	1.52e-08	0.179
FLHNPDAAQGFVGCALSSTIQR	H0Y532;Q13228;A6PVX1	Q13228	SELENBP1	-7.78	1.53e-08	0.18
RFESIPDMLELDHLTVSGDVTFGK	A0A7I2YQ74;Q16851;E7EUC7	Q16851	UGP2	-8.91	1.53e-08	0.18
NHGVVMPDANK	Q02252;G3V4Z4	Q02252	ALDH6A1	-8.16	1.54e-08	0.18
MAEDLILYCTK	F8W943;P04424;A0A5F9ZHM8;H7C0S8	P04424	ASL	-6.87	1.55e-08	0.18
SIYFQPPSFYVSAQDLPHIENGGVAVLTGK	O95831;A0A6Q8PG15;A0A6Q8PFM5;A0A7I2PK44;A0A6Q8PFE1;A0A6Q8PHJ9;A0A6Q8PHC0;A0A6Q8PFQ8;A0A6Q8PFS4;A0A6Q8PFA7;A0A7I2RLJ8;A0A6Q8PFW2;A0A6Q8PF87	O95831	AIFM1	-7.25	1.56e-08	0.181
DIGLQINFHGDELHPMK	Q96NU7	Q96NU7	AMDHD1	-7.86	1.56e-08	0.181
EFLQCVEK	P23786;A0A1B0GVF3;A0A1B0GTB8;A0A1B0GWC0;A0A1B0GTM0	P23786	CPT2	-7.15	1.56e-08	0.18
NVGCLQEALQLATSFAQLR	P49588;A0A6Q8PGN5;A0A6Q8PFY2;A0A6Q8PF33;A0A6Q8PGE8;H3BPK7;A0A6Q8PGR9;A0A6Q8PGB5	P49588	AARS	-6.19	1.57e-08	0.181
LNLPINIIGLAPLCENMPSGK	P28838	P28838	LAP3	-7.34	1.58e-08	0.181
LFENQLVGPESIAHIGDVMFTGTADGR	Q9HDC9;H0Y512	Q9HDC9	APMAP	-6.89	1.59e-08	0.181
LNCQVIGASVDSHFCHLAWVNTPK	Q06830;A0A0A0MSI0	Q06830	PRDX1	-7.87	1.59e-08	0.181
DADVQFLASVLPPDTDPAFFEHLR	Q6XQN6;G5E977;C9J8U2;H0YF31;H0YDA6	Q6XQN6	NAPRT	-6.34	1.61e-08	0.182
YVSSLTEEISK	P49257	P49257	LMAN1	-7.22	1.62e-08	0.183
GISAFLVPMPTPGLTLGK	P16219	P16219	ACADS	-8.46	1.63e-08	0.183
MYVPMTEDIYNAISAK	O14975;G3V1R7	O14975	SLC27A2	-6.96	1.66e-08	0.184
KEEELFLYLLQSGQAR	Q08426	Q08426	EHHADH	-8.03	1.68e-08	0.185
EENEGVYNGSWGGR	A0A1B0GTY9;H0YHM6;F8WDY6;F8VVF2;A0A0J9YWM6;A0A1B0GW65;F8WD33;A0A0J9YWK1;A0A1B0GW77;P49419;A0A1B0GTG2;A0A1B0GUA1;A0A1B0GW82;A0A1B0GTJ4;A0A1B0GV49;A0A0J9YWF7;A0A1B0GUY0	A0A1B0GW77	ALDH7A1	-6.02	1.7e-08	0.186
FGVEAFSDCLR	Q02338;E9PCG9;C9K0G7;H7C2W1	Q02338	BDH1	-7.71	1.7e-08	0.186
RDPLHEELLGQGCVFQER	Q9UL12;Q5SYV1	Q9UL12	SARDH	-7.75	1.7e-08	0.186
EHQASLDVNNPR	P10632;B7Z1F5;G3V188;A0A0D9SG51	P10632	CYP2C8	-7.34	1.71e-08	0.186
LLGTIYTAAEEIEAVGGK	Q6YN16	Q6YN16	HSDL2	-6.44	1.71e-08	0.186
ASSTCPLTFENVK	P45954	P45954	ACADSB	-7.62	1.73e-08	0.187
GVFHGIENFINEASYMSILGMTPGFGDK	P00367;A0A804HJD7;A0A804HKE0	P00367	GLUD1	-7.31	1.76e-08	0.188
MESIAAATQWVK	O14756	O14756	HSD17B6	-7.53	1.76e-08	0.188
NDGYLMFQQVPMVEIDGMK	P08263;P09210	P08263	GSTA1;GSTA2	-10.5	1.83e-08	0.191
QFTPCQLLADHANSPNK	H0YFD6;P40939;A0A2R8Y4F5	H0YFD6	HADHA	-6.83	1.84e-08	0.191
IVASTLSNPELFEEWTGNVK	P17174	P17174	GOT1	-8.83	1.86e-08	0.192
HVGDLGNVTADKDGVADVSIEDSVISLSGDHCIIGR	P00441;H7BYH4	P00441	SOD1	-9.35	1.86e-08	0.192
LMFNDFLSASSDTQTSLYK	P54868	P54868	HMGCS2	-8.4	1.87e-08	0.192
AVLGMAAAAEELLGQHLVQGVISVPK	Q8IVS8;A0A0C4DGA0	Q8IVS8	GLYCTK	-6.27	1.88e-08	0.192
EMLQTLGLASIDELIEK	P23378	P23378	GLDC	-7.47	1.89e-08	0.193
VHPDLGVIWVDAHTDINTPLTTTSGNLHGQPVSFLLK	P05089;A0A5F9ZGN6	P05089	ARG1	-8.97	1.9e-08	0.193
TDGEGALSEPSATVTIEELAAPPPPVLMHHGESSQVLHPGNK	P04217	P04217	A1BG	-6.84	1.96e-08	0.195
SAATLITHPFHVITLR	E9PIE4;Q9Y6C9	Q9Y6C9	MTCH2	-6.93	1.96e-08	0.195
FSCDVAEGK	P35573	P35573	AGL	-6.53	1.97e-08	0.195
NTVHDQEHIMEHLEGVINKPEAEMSPQELQLHYFK	Q8NI22;H7BZ18;A0A3B3IU18	Q8NI22	MCFD2	-7.34	1.97e-08	0.195
MGFCSVQEDINSLCLTVVQR	P54868	P54868	HMGCS2	-7.81	1.98e-08	0.196
INEGIGQGDLSELPELHALTAGLK	Q15067	Q15067	ACOX1	-7.97	1.99e-08	0.196
DPQNCQEFLGSPELINWK	Q6IB77;K7ES21	Q6IB77	GLYAT	-6.6	2e-08	0.196
VNAVNPTVVMTSMGQATWSDPHK	J3KS22;J3QL34;Q7Z4W1;J3QS36;J3QRQ2	Q7Z4W1	DCXR	-10	2.01e-08	0.197
AVLVTGCDSGFGFSLAK	Q02338;C9JM78;C9JQ90;A0A0G2JRX6;C9JEB9	Q02338	BDH1	-6.73	2.04e-08	0.198
DVVFNYLHATAFQGTPLAQAVEGPSENVR	P31930	P31930	UQCRC1	-7	2.05e-08	0.198
LDILVNNAGVNNEK	P15428;E9PBZ2	P15428	HPGD	-6.21	2.08e-08	0.199
ADCTITMADSDFLALMTGK	P22307;H0YF61	P22307	SCP2	-7.85	2.08e-08	0.199
ICDQWDALGSLTHSR	F5GXS2;H7C144;O43707	O43707	ACTN4	-7.07	2.09e-08	0.199
QATYGYYLGNPAEFHDSSDHHTFK	Q15293	Q15293	RCN1	-5.98	2.1e-08	0.199
FIIHAPPGEFNEVFNDVR	P47755;F8W9N7;C9JUG7	P47755	CAPZA2	-7.74	2.11e-08	0.2
SQSSNDTFPTAMHIAAAIEVHEVLLPGLQK	P07954;A0A804HI24	P07954	FH	-7.79	2.11e-08	0.2
GIETGSEDLEILPNGLAFISSGLK	P27169	P27169	PON1	-6.35	2.13e-08	0.2
ESAVFDAVMVCSGHHVYPNLPK	P31513	P31513	FMO3	-7.68	2.14e-08	0.201
ILADSINSEIGILCSALQK	P00439;J3KND8	P00439	PAH	-7.21	2.15e-08	0.201
MEDPVCENEILATLHAISSK	P23378	P23378	GLDC	-7.61	2.16e-08	0.201
DIQNTQCLLNVEHLSAGCPHVTLQFADSK	Q7KZF4	Q7KZF4	SND1	-6.54	2.16e-08	0.201
FIVDGWHEMDAENPLHQPSPSLNK	A0A0D9SFP2;A0A1W2PNM1;A0A1W2PQ78;Q16836;E9PF18;A0A0A0MSE2;A0A804HLB5	Q16836	HADH	-8.87	2.17e-08	0.202
LAQNALNTFSIASDPASSSSCYLEEHVSK	P05177	P05177	CYP1A2	-7.34	2.18e-08	0.202
LFSSHLPIQLFPK	Q06520	Q06520	SULT2A1	-9.12	2.18e-08	0.202
LLIGTVFHK	P27169	P27169	PON1	-6.96	2.24e-08	0.204
MMITSQDVLHSWAVPTLGLK	P00403	P00403	MT-CO2	-7.18	2.26e-08	0.204
IAAAGLDVTSPEPLPTNHPLLTLK	Q9UBQ7;U3KQ56	Q9UBQ7	GRHPR	-7.77	2.28e-08	0.205
YPPPAVESDAADIVFLIDSSEGVRPDGFAHIR	P12111	P12111	COL6A3	-7.58	2.29e-08	0.205
GWDQGLLGMCEGEK	P26885;A0A494C1N0;F5H0N4	P26885	FKBP2	-6.29	2.29e-08	0.205
ENFSCLTR	P40925;A0A5K1VW95;B9A041;C9JF79;C9JRL4	P40925	MDH1	-8.96	2.29e-08	0.205
TIHMTFVPDEEVGGHQGMELFVQRPEFHALR	C9JMV9;Q03154;A0A1B0GW23;A0A1B0GU86;A0A1B0GV31;C9JYZ0;F8WC59	Q03154	ABHD14A-ACY1;ACY1	-9.07	2.32e-08	0.206
GPQGVEDGDRPQPSSK	Q96EY8;F5H4Z7;A0A087X114;S4R3Z1;F5H079	Q96EY8	MMAB	-6.49	2.33e-08	0.207
KPLLPYTPGSDVAGVIEAVGDNASAFK	Q08257;A6NP24;C9JH92	Q08257	CRYZ	-8.87	2.34e-08	0.207
TYTESQSSLR	Q96JY6;C9JS55;C9JSR2;C9K0F0;C9J0X3;C9J760;A0A087WXJ0	Q96JY6	PDLIM2	-6.03	2.36e-08	0.208
TMTQFLEQGEATLSVAR	Q96GK7;Q6P2I3;C9JGM0;C9J5B6	Q96GK7	FAHD2A;FAHD2B	-6.48	2.38e-08	0.208
GAQVIENCPVTGIR	Q5SYU9;Q9UL12;Q5SYV1;Q9UL10	Q9UL12	SARDH	-7.02	2.42e-08	0.21
ASSTSPVEISEWLDQK	A0A8I5KYH4;A0A8I5KVL5;H0YLU7;A0A0S2Z3M4;A0A8I5KUR2;P13804;A0A8I5KYP7;A0A8I5KT03;H3BV91;A0A8I5KUF3;H0YKF0;H0YK49;A0A8I5KVC9	P13804	ETFA	-8.06	2.44e-08	0.21
LFPLIQAMHPTLAGK	A0A7I2V649;H0YB75;H0YAS6;A0A7I2YQ88;P11940;E7EQV3;H0YAR2;A0A7I2V4N4;A0A7I2YQE4;A0A087WTT1;A0A7I2YQ90;E7ERJ7;Q9H361	P11940	PABPC1;PABPC3	-6.51	2.45e-08	0.21
LTLAELNQILYR	P35573	P35573	AGL	-7.34	2.47e-08	0.211
VSDSISAQYPVVDHEFDAVVVGAGGAGLR	P31040;D6RFM5;A0A494C1T6	P31040	SDHA	-6.35	2.49e-08	0.211
LLNEASTTHHCVETGSQEASAIYFTSGTSGLPK	Q08AH3;F5GWL3;H3BRR3;Q68CK6;H3BTX9	Q68CK6	ACSM2A;ACSM2B	-6.66	2.52e-08	0.212
LPCIYLVDSGGAYLPR	A0A804HHS4;A0A804HJW5;D6RDF7;A0A804HIH3;A0A0S2Z5R4;A0A0D9SFE9;D6R9R1;A0A804HJW2;A0A0G2JM88;A0A804HJ24;Q9HCC0;A0A804HJ84;A0A804HLJ9;A0A804HK37;A0A804HKE8;A0A804HJ31;A0A804HL02	A0A804HJ24	MCCC2	-5.86	2.52e-08	0.212
LVIGQNGILSTPAVSCIIR	P36871;A0A3B3ITK7	P36871	PGM1	-7.71	2.53e-08	0.213
GQLGNWMSPADFQR	Q16822;H0YM31	Q16822	PCK2	-8.21	2.54e-08	0.213
ELSTPVTFPDGR	Q02928;A0A0C4DFV7;V9GZ77;V9GYC6;Q5TCH5;A0A087WZX9;Q5TCH4;A0A0C4DFN9	Q02928	CYP4A11;CYP4A22	-8.34	2.58e-08	0.214
MADEAGSEADHEGTHSTK	P02671	P02671	FGA	-8.74	2.59e-08	0.214
ISAGAIEESILSHGTVADCAVVGK	A0A0B4J1R2;Q9H6R3	A0A0B4J1R2	ACSS3	-6.53	2.62e-08	0.215
RCEFVMEVTNK	A0A7I2YQ74;Q16851;E7EUC7	Q16851	UGP2	-7.36	2.64e-08	0.216
VIQLGTLVDNLTVDPATGDILAGCHPNPMK	Q15166	Q15166	PON3	-7.28	2.67e-08	0.217
KPLVIIAEDVDGEALSTLVLNR	P10809;A0A7I2V599;A0A7I2V2X6;A0A7I2YQK6;A0A7I2V5M1;A0A7I2V5K3;A0A7I2YQ71	P10809	HSPD1	-8.07	2.71e-08	0.218
NDLGHPFCNNLR	P35573	P35573	AGL	-6.85	2.73e-08	0.218
MDLSAASHR	P51857;C9J3U1	P51857	AKR1D1	-8.46	2.75e-08	0.219
DVQNTFYDIVAELGAMEHAQAVDYIK	P16435;E7EMD0	P16435	POR	-7.3	2.77e-08	0.22
HLWEVDVQGSK	P04424;A0A5F9ZHM8;A0A5F9ZHC6	P04424	ASL	-7.23	2.78e-08	0.22
TTVLLADINDFNTVNEIYK	P52758;H0YB34;H0YBX3	P52758	HRSP12	-7.89	2.79e-08	0.22
ILDIYHQEACGGCIISVGGQIPNNLAVPLYK	P31327;A0A669KBF2	P31327	CPS1	-8.64	2.8e-08	0.22
IAHAEAQVGLPEVTLGLLPGAR	Q08426	Q08426	EHHADH	-7.73	2.8e-08	0.22
AILQEVLDADLSNEAFPFSTHK	Q9UL12;Q5SYV2	Q9UL12	SARDH	-7.59	2.81e-08	0.22
ACQLAHQHTDQVIQLR	Q02928;A0A0C4DFV7;V9GYC6;Q5TCH4;A0A0C4DFN9	Q02928	CYP4A11;CYP4A22	-8.01	2.82e-08	0.221
AGQPLQLLDASWYLPK	P25325;B1AH49	P25325	MPST	-8.32	2.85e-08	0.221
AIFLHPEPFSIENGLLTPTLK	Q9ULC5;A0A8C8L3F5;A0A8C8KCK5	Q9ULC5	ACSL5	-7.41	2.89e-08	0.223
SVDYPCLLRPSYVLSGSAMNVVFSEDEMK	P31327;A0A669KBF2	P31327	CPS1	-7.41	2.9e-08	0.223
LFIHESIHDEVVNR	A0A1B0GW77;P49419;A0A1B0GTG2;A0A1B0GUA1;A0A1B0GW82;A0A1B0GTJ4;A0A1B0GV49;A0A1B0GUY0	A0A1B0GW77	ALDH7A1	-6.07	2.91e-08	0.223
IFFYDSENPPASEVLR	P27169	P27169	PON1	-6.46	2.92e-08	0.223
GISLNPEQWSQLK	P53999	P53999	SUB1	-6.98	2.93e-08	0.224
DPSFFSNPQDFNPQHFLNEK	P11509	P11509	CYP2A6	-7.91	2.96e-08	0.224
NDANPETHAFVTSPEIVTALAIAGTLK	A0A7I2V586;A0A7I2V3U0;A0A7I2V3F1;Q99798;A2A274;A0A7I2V5T4;A0A7I2V5A1;A0A7I2V614	Q99798	ACO2	-7.75	2.97e-08	0.225
FSAVHEFQNLHAMYK	P54840	P54840	GYS2	-6.7	3e-08	0.225
AAELGAELGAQAISHLEEVSDEGIVAMATAR	Q96NU7	Q96NU7	AMDHD1	-7.54	3.1e-08	0.228
APVYFYEFQHQPSWLK	O00748;J3QSC0	O00748	CES2	-7.17	3.11e-08	0.228
LLGQFTLIGIPPAPR	P38646;A0A7I2V2G2;D6RCD7;A0A7I2V2S7;A0A7I2YQB2;A0A7I2V3F7;H0Y8S0	P38646	HSPA9	-6.47	3.12e-08	0.228
ESLCQAALGLILK	Q96RQ3;E9PHF7;E9PG35	Q96RQ3	MCCC1	-6.61	3.12e-08	0.228
ELMWNFR	Q08AH3;E7EPS5;I3L2Y5;I3L438;Q68CK6;H3BNJ9;H3BM61;H3BQ84	Q68CK6	ACSM2A;ACSM2B	-6.79	3.13e-08	0.228
HDNWDLTQLK	Q15166;F8WD41	Q15166	PON3	-6.87	3.13e-08	0.228
HELQVEMK	O60610;A0A2R8Y5N1	O60610	DIAPH1	-5.65	3.17e-08	0.23
ISEAFDLMNQGK	P08319	P08319	ADH4	-7.18	3.2e-08	0.23
FCLSPLTNLCGK	P08319;D6R9K8;D6RIB1	P08319	ADH4	-8.32	3.22e-08	0.231
APHYPGIGPVDESGIPTAIR	H7BXR3;C9IZ89;C9J3W4;C9JL62;O94875;H7BZK1	O94875	SORBS2	-6.76	3.32e-08	0.234
SLIDGILTNK	Q7Z5P4	Q7Z5P4	HSD17B13	-8.04	3.38e-08	0.235
YGAFGLPITVAHVDGQTHMLFGSDR	Q9Y2Q3	Q9Y2Q3	GSTK1	-8.23	3.39e-08	0.235
QVAELSECIGSALIQK	P33121;D6RER0	P33121	ACSL1	-7.31	3.45e-08	0.237
EGSTHNWQHITDQIGMFCFTGLKPEQVER	P00505	P00505	GOT2	-7.98	3.45e-08	0.237
VLDWICR	H0YML5;Q16822	Q16822	PCK2	-8.11	3.52e-08	0.239
AVLEEGTDVVIK	Q9NSE4	Q9NSE4	IARS2	-6.47	3.54e-08	0.239
ENGMDVFR	P11498	P11498	PC	-7.28	3.54e-08	0.239
GIHFQDYDTTPFQAK	P15428	P15428	HPGD	-7.52	3.6e-08	0.241
FEELCSDLFR	A0A0G2JIW1;P0DMV9;P0DMV8;V9GZ37;P17066;P48741	A0A0G2JIW1	HSPA1B;HSPA1A;HSPA6;HSPA7	-6.42	3.62e-08	0.241
TLSPGDSFSTFDTPYCR	Q9NQR4;H7C579	Q9NQR4	NIT2	-6.36	3.68e-08	0.243
DHVYLQLHHLPPEQLATR	P31040;D6RFM5	P31040	SDHA	-6.62	3.75e-08	0.244
DQEGQDVLLFIDNIFR	F8W0P7;P06576;H0YH81	P06576	ATP5B	-8.77	3.82e-08	0.246
LGALQHTPVLDSVVEETLR	Q9UNU6;C9JFR9	Q9UNU6	CYP8B1	-7.16	3.84e-08	0.247
YLQPDNLSK	E9PBP6;P55157	P55157	MTTP	-7.5	3.85e-08	0.247
ALPFWNEEIVPQIK	P15259;P18669;Q8N0Y7	P18669	PGAM2;PGAM1;PGAM4	-8.52	3.87e-08	0.247
GVAGAHGLLCLLSDHVDK	Q9UBQ7;U3KQ56	Q9UBQ7	GRHPR	-8.1	3.88e-08	0.247
TAAQNLYEK	K7ER74;P02655;Q6P163	K7ER74	APOC4-APOC2;APOC2	-7.55	3.91e-08	0.248
SEGHLCLPVR	B7Z8V7;D6RHI4;Q4G0N4;A0A0C4DGV3	Q4G0N4	NADK2	-8.19	3.92e-08	0.248
SSEPPPPPQPPTHQASVGLLDTPR	Q9Y2V2;H3BUY4;H3BPY5;H3BNU9;H3BSW7;H3BTK3;I3L3X8	Q9Y2V2	CARHSP1	-6.46	4e-08	0.25
ETHVMDYR	A0A087X1Z3;Q9UL46;H0YM70	A0A087X1Z3	PSME2	-7.48	4.07e-08	0.251
QATEGPCNMPK	A0A0C4DGA2;O75521;F1LLU7;F8WAW4;F8W6J1;C9JB63	A0A0C4DGA2	ECI2	-6.33	4.09e-08	0.252
FNITPEIK	A0A7P0TAR1;P43155;A0A7P0T9R9;A0A7P0T9E7;H0Y4Z7;A0A7P0TBF3	A0A7P0TAR1	CRAT	-6.49	4.12e-08	0.253
EVIAVSCGPAQCQETIR	P38117	P38117	ETFB	-7.28	4.12e-08	0.253
FAQEQIAPLVSTMDENSK	P45954	P45954	ACADSB	-7.12	4.13e-08	0.253
LHPTDNFAQSSCFGLR	P30039;A0A0C4DFS0	P30039	PBLD	-7.83	4.18e-08	0.254
GNPAAVCLLENELDEDMHQK	P30039	P30039	PBLD	-8.05	4.2e-08	0.254
AAATPESQEPQAK	P49006	P49006	MARCKSL1	-5.9	4.21e-08	0.254
VECVGDDIAWMR	H0YML5;Q16822;H0YM31	Q16822	PCK2	-7.41	4.23e-08	0.255
LVNSVAGCADDALAGLVACNPNLQLLQGHR	Q3LXA3;H0YCY6;E9PJG8;E9PQR1	Q3LXA3	DAK;TKFC	-7.16	4.28e-08	0.256
LADDVDLEQVANETHGHVGADLAALCSEAALQAIR	A0A7P0T8A3;A0A7P0TAY0;A0A7P0T8Q5;A0A7P0Z4C6;A0A7I2V2Y2;C9JUP7;P55072;A0A7P0TAW3;A0A7I2V540;A0A7P0TAQ1	P55072	VCP	-7.23	4.29e-08	0.256
AEGIPVEMVVIGDDSAFTVLK	Q3LXA3;H0YCY6;E9PJG8	Q3LXA3	DAK;TKFC	-7.85	4.31e-08	0.257
AVTLHDQGTAQWADLSSQFYLR	P22314;Q5JRR9;Q5JRS0;Q5JRS1;Q5JRS3;Q5JRS2	P22314	UBA1	-5.82	4.31e-08	0.257
SIAQYWLGCPAPGHL	P04004	P04004	VTN	-6.31	4.32e-08	0.257
AANLYASSPHSDFLDYVSAPIGK	Q8IWW8	Q8IWW8	ADHFE1	-6.68	4.36e-08	0.257
AFIVLTPAYSSHDPEALTR	Q6NUN0	Q6NUN0	ACSM5	-6.87	4.38e-08	0.258
HLEGLSEEAIMELNLPTGIPIVYELDK	P18669	P18669	PGAM1	-6.65	4.4e-08	0.258
EMVAHNYDR	E9PBP6;P55157	P55157	MTTP	-7.54	4.5e-08	0.26
ESTYQGHHTPPVQK	P00414	P00414	MT-CO3	-7.91	4.54e-08	0.261
KPEVTDLEYFEEAANFLLR	Q14032;A0A6Q8PF60;A0A6Q8PHR9	Q14032	BAAT	-8.1	4.56e-08	0.261
SCYEDGWLIK	P23434;A0A1W2PQV2;H3BUH9	P23434	GCSH	-7.35	4.56e-08	0.261
TGMTNMTQSLER	O14756	O14756	HSD17B6	-7.68	4.57e-08	0.262
VLEACSIACNK	P34896	P34896	SHMT1	-8.21	4.6e-08	0.262
LMEYCQHGVK	O75891	O75891	ALDH1L1	-8.9	4.7e-08	0.264
KLEDQLQGGQLEEVILQAEHELNLAR	Q16718;A0A7I2V2W4;A0A087X1G1;A0A7I2V3L8;A0A024R772;A0A087WXR5	Q16718	NDUFA5	-7.47	4.7e-08	0.264
NFLAFIQHLR	E9PBP6;P55157	P55157	MTTP	-6.75	4.72e-08	0.264
GDALVAGGICQTSIYK	Q9H2M3;E5RH96	Q9H2M3	BHMT2	-6.9	4.73e-08	0.265
LIGPNCPGVINPGECK	P53597;A0A494C0D1	P53597	SUCLG1	-6.66	4.74e-08	0.265
AMEALATAEQACK	F8W7S5;Q9P2E9	Q9P2E9	RRBP1	-7.03	4.75e-08	0.265
IPGLLSPHPLLQLSYTATDR	P49327;A0A0U1RQF0	P49327	FASN	-7.67	4.79e-08	0.266
ILLMDLNEEDPTVLELGITGSK	P27169	P27169	PON1	-6.48	4.8e-08	0.266
ITHNPFGPGQFFDLSIR	P56470;M0QZ93	P56470	LGALS4	-7.93	4.82e-08	0.266
IGPIATPDYIQNAPGLPK	Q9NR19	Q9NR19	ACSS2	-6.55	4.95e-08	0.268
QMFGNADMNTFPTFK	P18859;A8MUH2	P18859	ATP5J	-7.21	4.95e-08	0.268
ELDPIQK	P18859;A8MUH2	P18859	ATP5J	-7.49	4.97e-08	0.269
LHFFMPGFAPLTSR	P04350;Q5JP53;P07437;Q5ST81;A6NNZ2;P68371;Q13885;Q3ZCM7;A0A075B736;Q5SQY0;Q9BUF5;K7ESM5;Q9BVA1	P68371	TUBB4A;TUBB;TUBB4B;TUBB2A;TUBB8;TUBB6;TUBB2B	-8.87	5e-08	0.269
SCLEEGLEPTCFEK	P31513;V9GZ60;V9GYP3	P31513	FMO3	-7.41	5.05e-08	0.27
LLGHWEEAAHDLALACK	P50502;H7C3I1;Q8IZP2	P50502	ST13;ST13P4	-7.93	5.18e-08	0.272
VLVVPTDGSPWLSMR	P22310	P22310	UGT1A4	-6.94	5.21e-08	0.273
AGASIIGVNCHFDPTISLK	Q93088	Q93088	BHMT	-8.53	5.29e-08	0.274
NHDMVVVSPILER	Q9UBR1	Q9UBR1	UPB1	-8.59	5.3e-08	0.274
QAAPCVLFFDELDSIAK	A0A7P0T8A3;A0A7P0T8Q5;A0A7P0Z4C6;C9JUP7;P55072;A0A7P0TAW3;A0A7I2V540;A0A7P0TAQ1	P55072	VCP	-6.37	5.32e-08	0.275
MQNIQFEAVVGHK	Q7Z5P4	Q7Z5P4	HSD17B13	-8.02	5.34e-08	0.275
FTLDCTHPVEDGIMDAANFEQFLQER	P35268	P35268	RPL22	-6.58	5.35e-08	0.275
AYQIDTVINLNVPFEVIK	Q9UIJ7	Q9UIJ7	AK3	-6.28	5.36e-08	0.275
SQPGVPHPDIQFHFLPSQVIDHGR	Q8NE62	Q8NE62	CHDH	-6.41	5.36e-08	0.275
TLDGGLNVIQLETAVGAAIK	A0A7I2YQ74;Q16851;E7EUC7	Q16851	UGP2	-8.47	5.38e-08	0.276
QVAEVNLWGTVR	Q02338;E9PCG9;C9K0G7;C9JM78;C9JQ90;A0A0G2JRX6;H7C2W1	Q02338	BDH1	-6.5	5.39e-08	0.276
TIAYGYIHDPSGGPVSLDFVK	Q9UL12;Q5SYV2	Q9UL12	SARDH	-7.53	5.41e-08	0.276
IFNTNNLWISLAAVK	A0A7I2YQ74;Q16851;E7EUC7	Q16851	UGP2	-6.52	5.43e-08	0.276
LFTLAESLGGFESLAELPAIMTHASVLK	P32929	P32929	CTH	-6.92	5.46e-08	0.277
APSHVPFLLIGGGTAAFAAAR	O95831;A0A6Q8PG15;A0A6Q8PFM5;A0A7I2PK44;A0A6Q8PFE1;A0A6Q8PHJ9;A0A6Q8PHC0;A0A6Q8PFQ8;A0A6Q8PFS4;A0A6Q8PFA7;A0A7I2RLJ8;A0A6Q8PFW2;A0A6Q8PF87	O95831	AIFM1	-7.2	5.5e-08	0.277
HELLPSVNDITAVGPAHFYATNDHYFSDPFLK	A0A0J9YXF2;Q15165;G3XAK4;A0A0J9YXU7;A0A0J9YYJ1	A0A0J9YXF2	PON2	-6.21	5.5e-08	0.277
SHYFEGVLK	P54619;F8VYY9;H0YIC9;F8VZX1;H0YHF8	P54619	PRKAG1	-5.85	5.5e-08	0.277
NGNPNGEGLPHWPLFDQEEQYLQLNLQPAVGR	O00748	O00748	CES2	-5.49	5.57e-08	0.278
MPYMEAVIHEIQR	P11509;P20853;F8W816	P11509	CYP2A6;CYP2A7	-6.97	5.64e-08	0.28
INAWNSPTLPIYEPGLK	O60701;E7ETF4;E7EV97;E7ER83;E7ER95	O60701	UGDH	-7.21	5.72e-08	0.281
LICCDILDVLDK	P62258;K7EIT4	P62258	YWHAE	-7.61	5.88e-08	0.284
IITMLPTSINAIEAYSGANGILK	P31937;H7BZL2	P31937	HIBADH	-6.58	5.91e-08	0.284
LAALPENPPAIDWAYYK	O75947;F5H608	O75947	ATP5H	-6.87	5.97e-08	0.285
EIFLSQPILLELEAPLK	P36873;F8VYE8;F8W0W8;F8VR82;A0A087WYY5;F8WE71;P62136;A0A7I2V4F7;E9PMD7;P62140;E7ETD8;C9JP48;C9J9S3	P62136	PPP1CC;PPP1CB;PPP1CA	-5.32	6.02e-08	0.286
VCLIGCGFSTGYGSAVNVAK	D6RHZ6;V9HW50;P00325;P07327	V9HW50	ADH1B;HEL-S-117;ADH1A	-8.43	6.08e-08	0.287
AHFPLDVQWNDLDYMDSR	P10253	P10253	GAA	-6.54	6.11e-08	0.287
YYTLEEIQK	P00167	P00167	CYB5A	-6.24	6.12e-08	0.287
ASAGLLGAHAAAITAYALTLTK	P0C0L4;P0C0L5;F5GXS0;A0A3B3ISA6;A0A0G2JPR0;A0A140TA49	P0C0L5	C4A;C4B	-5.82	6.17e-08	0.288
DIINMLFYHDR	P06737;E9PK47	P06737	PYGL	-8.33	6.19e-08	0.289
ESLSSYWESAK	K7ER74;P02655;Q6P163;V9GYJ8	K7ER74	APOC4-APOC2;APOC2	-7.54	6.23e-08	0.289
AGLWTPEAVIEHPDAVR	Q9H2M3	Q9H2M3	BHMT2	-8.52	6.24e-08	0.289
YFDQVDISNGLDWSLDHK	Q15493	Q15493	RGN	-6.35	6.25e-08	0.289
AATFGLILDDVSLTHLTFGK	P35232;C9JW96;E9PCW0;E7ESE2;C9JZ20	P35232	PHB	-6.76	6.29e-08	0.29
LQVEHPVTEMITGTDLVEWQLR	Q96RQ3;E9PHF7;E9PG35;G5E9X5	Q96RQ3	MCCC1	-5.48	6.31e-08	0.29
MELIQDTSRPPLEYVK	P0DMN0;P0DMM9;A0A0A6YYL2;H3BNY7;P50225;H3BRY5;H3BQX5	P50225	SULT1A4;SULT1A3;SULT1A1	-6.4	6.33e-08	0.291
VLPGSSVLFLCDMQEK	Q96AB3;K7EKW4;K7ENV7	Q96AB3	ISOC2	-7.02	6.37e-08	0.291
LEDAHLVVVTSWEEQK	P07306;J3QSZ2;K7EPS5;I3L129	P07306	ASGR1	-6.19	6.42e-08	0.292
AGCQVVAPSDMMDGR	P13716	P13716	ALAD	-7.26	6.45e-08	0.292
VDAILCVAGGWAGGNAK	P09417;B7Z415;D6RGG7;H0Y8F7	P09417	QDPR	-7.2	6.49e-08	0.293
SLPEETVDLMVEHTSFK	A0A7I2V2T5;P50226;E9PKW4	P50226	SULT1A2	-6.01	6.54e-08	0.294
VGWEQLLTTIAR	F5GXS2;H7C144;O43707;A0A804HII9;A0A804HK61;A0A7I2V4Y4;A0A804HLF4;H7C5W8;H0YJW3;H0YJ11;A0A804HIN7;A0A804HL31;P12814	O43707	ACTN4;ACTN1	-7.73	6.55e-08	0.294
SNIWVAGDAACFYDIK	O95831;A0A6Q8PG15;A0A7I2PK44;A0A6Q8PFE1;A0A6Q8PHJ9;A0A6Q8PHC0;A0A6Q8PFQ8;A0A6Q8PFS4;A0A6Q8PFA7;E9PMA0	O95831	AIFM1	-6.02	6.61e-08	0.295
NFMVINSVAFDHADPSIFTVLTAK	Q93099;H7C576	Q93099	HGD	-7.88	6.64e-08	0.295
HMAAASAECQNYAK	F8W7S5;Q9P2E9;A0A087WU26	Q9P2E9	RRBP1	-7.72	6.72e-08	0.296
IPHFGYCDEIDLTELVK	P11182;A0A7P0Z494;Q5VVL7;A0A7P0T9W1	P11182	DBT	-6.76	6.74e-08	0.296
EMAYHLAK	P28845;A0A0A0MQV1;A0A087WU76	P28845	HSD11B1	-7.07	6.77e-08	0.297
LSTETGFALLGGHPCFLTTQDIHLGVNESLTDTAR	P00480	P00480	OTC	-8.21	6.77e-08	0.297
VQEAPIDEHWIIECNDGVFQR	Q14353;A0A1W2PR36	Q14353	GAMT	-7.6	6.82e-08	0.298
AVGMHSFLVVGPQALDPVVR	Q9BSH5	Q9BSH5	HDHD3	-6.44	6.91e-08	0.299
WMIQYNNLNLK	A0A494C1T2;P11586;V9GYY3;F5H2F4;V9GZ78	P11586	MTHFD1	-7.43	6.92e-08	0.299
YIDLIPTSLPHAVTCDVK	P33261	P33261	CYP2C19	-7.11	6.97e-08	0.3
ADGYVDNLAEAVDLLLQHADK	Q9H008	Q9H008	LHPP	-7.57	6.97e-08	0.3
YEMYPLGVK	Q02338;E9PCG9;C9K0G7;H7C2W1	Q02338	BDH1	-6.43	7e-08	0.3
EMVECFNK	M0R248;M0QZW4;Q13011	Q13011	ECH1	-8.15	7e-08	0.3
THLPLALLPQTLLDQK	P50225;H3BRY5;H3BQX5;P50226;E9PKR8	P50225	SULT1A1;SULT1A2	-8	7.03e-08	0.3
LWVDPNSPVLLEDPVLCALAK	P17516	P17516	AKR1C4	-6.44	7.05e-08	0.301
AAGVNVEPFWPGLFAK	P05386	P05386	RPLP1	-7.68	7.07e-08	0.301
AHCQTSGWSLTEQDPYNNIVR	P22033	P22033	MUT	-6.26	7.08e-08	0.301
TVNTAVAITLACFGLAR	P05089;A0A5F9ZH78;A0A5F9ZGN6	P05089	ARG1	-7.93	7.09e-08	0.301
SCAEWVSLSK	O75947	O75947	ATP5H	-5.98	7.12e-08	0.302
ESQPLLGTVIDGMLLLK	P23141;H3BSU0	P23141	CES1	-9.51	7.4e-08	0.305
GAQAIFNELPCEYVEPHELK	Q9UDR5;F8WAH1;F8WE53;A0A7P0T9N4;A0A7P0T834	Q9UDR5	AASS	-6.84	7.41e-08	0.305
ILGEELGFASLHDLQLLGK	P04114;A8MUN2	P04114	APOB	-6.98	7.41e-08	0.305
IFNTWLGDPSK	H3BRN4;P80404;H3BNQ7	H3BRN4	ABAT	-7.27	7.43e-08	0.306
ECIEAVIR	P24298	P24298	GPT	-7.24	7.45e-08	0.306
GEQATFDWVFK	P11509;P20853	P11509	CYP2A6;CYP2A7	-6.82	7.58e-08	0.307
HLDLLYPTILGHEGAGIVESIGEGVSTVKPGDK	P28332;Q8IUN7	P28332	ADH6	-8.35	7.65e-08	0.308
DGTTHQTSLELFMYLNEVAGK	P00966	P00966	ASS1	-9.23	7.65e-08	0.308
GLQVVEHACSVTSLMMGETMPSITK	Q02252	Q02252	ALDH6A1	-6.68	7.66e-08	0.308
SLLDSDHHPSEIAESHR	P42357	P42357	HAL	-7.16	7.68e-08	0.309
VGMAAVQLAPGQTFDGEK	Q9Y2P5	Q9Y2P5	SLC27A5	-6.83	7.7e-08	0.309
NVQFNYPHTSVTDVTQNNFHNYFGGSEIVVAGK	P19823;Q5T985	P19823	ITIH2	-5.98	7.83e-08	0.31
NCFGEGLAR	P11509;P20853;F8W816	P11509	CYP2A6;CYP2A7	-6.25	7.84e-08	0.311
ELAPYDENWFYTR	P39019;M0R2L9;M0QYF7;M0R140	P39019	RPS19	-6.57	7.9e-08	0.311
YGVEAFSDSLR	O75452	O75452	RDH16	-7.53	7.92e-08	0.312
DMHGYDIR	Q9UL12;Q5SYV1	Q9UL12	SARDH	-7.46	7.94e-08	0.312
NTGVQVTHNHVEDGFHGAFSFLGLK	P22760	P22760	AADAC	-7.44	8.03e-08	0.313
FESIPDMLELDHLTVSGDVTFGK	A0A7I2YQ74;Q16851;E7EUC7	Q16851	UGP2	-7.33	8.03e-08	0.313
HGYPLIIYDVFPDACK	P31937	P31937	HIBADH	-6.68	8.04e-08	0.313
LTTPTYGDLNHLVSATMSGVTTCLR	P04350;Q5JP53;P07437;Q5ST81;P68371;Q13885;Q9BVA1;M0R2D3	P68371	TUBB4A;TUBB;TUBB4B;TUBB2A;TUBB2B	-8.1	8.2e-08	0.315
YVYIAELLAHK	P27169	P27169	PON1	-6.15	8.25e-08	0.315
MQIMTHLPGAISDMIYIR	Q02338;E9PCG9	Q02338	BDH1	-8.09	8.28e-08	0.316
FFPLESWQIGK	P30046;J3KQ18;H7C342	P30046	DDT	-10.1	8.38e-08	0.317
MADSGGQPQLTQPGK	G3V4S9;A0A0U1RR50;G3V578;H0YJT9;G3V5L7;Q9UN36	Q9UN36	NDRG2	-5.78	8.39e-08	0.317
DTFNHLTTWLEDAR	E9PKL7;P61019;H7C125	P61019	RAB2A	-5.82	8.4e-08	0.317
LCGSGFQSIVNGCQEICVK	K7EME0;K7EJ68;K7EJB1;P42765;A0A0B4J2A4;K7ER88	P42765	ACAA2	-7.88	8.41e-08	0.317
SSFANQGEICLCTSR	Q9H2A2	Q9H2A2	ALDH8A1	-6.35	8.46e-08	0.318
YGVEAFSDILR	O14756	O14756	HSD17B6	-6.14	8.49e-08	0.318
LFEGENEHLSSMNNYLSETYQEFR	Q13576;F5H7S7	Q13576	IQGAP2	-6.2	8.55e-08	0.319
LREQLGPVTQEFWDNLEK	P02647;F8W696	P02647	APOA1	-7.53	8.61e-08	0.319
WEFVSAFR	Q06278	Q06278	AOX1	-6.43	8.69e-08	0.32
YIGGCCGFEPYHIR	Q93088;E5RJH0;Q9H2M3	Q93088	BHMT;BHMT2	-8.26	8.71e-08	0.32
IFGTDSQYNAYNEK	Q15800	Q15800	MSMO1	-6.08	8.73e-08	0.32
YQLLQLVEPFGVISNHLILNK	P43243;A0A0R4J2E8;D6REM6;D6R991;B3KM87;H0Y8T4;D6RBK5;D6RIA2;D6RE02;D6RBI2;A8MXP9	A8MXP9	MATR3	-6.01	8.74e-08	0.32
YTWNDVGQLVEK	P35573	P35573	AGL	-5.95	8.85e-08	0.322
VHPEPGTWDSFLEK	P50225;H3BRY5;H3BQX5	P50225	SULT1A1	-8.69	8.89e-08	0.322
TESVAAAAQWVK	O75452	O75452	RDH16	-7.65	8.9e-08	0.322
NSADGLNMFDGTDSCYFHSGPR	Q04446;E9PGM4	Q04446	GBE1	-6.68	8.92e-08	0.322
VFNTTPDDLDLHVIYDVSHNIAK	Q9Y3I0	Q9Y3I0	RTCB	-6.18	8.92e-08	0.322
YWGVASFLQK	Q5VY30;P02753	Q5VY30	RBP4	-6.11	8.93e-08	0.322
VGTEHFPNEFTSGDGK	Q9UBR1	Q9UBR1	UPB1	-7.02	8.94e-08	0.323
DICNDVLSLLEK	P63104;E7EX29;E7ESK7;B0AZS6	P63104	YWHAZ	-7.23	9.12e-08	0.325
NASNPLAHYDTTADEILQQCDGK	P35520	P35520	CBS	-7.25	9.13e-08	0.325
IVSWSQVGVEPSIMGIGPIPAIK	Q9BWD1	Q9BWD1	ACAT2	-6.4	9.17e-08	0.325
IAPSFAVESIEDALK	P31327;A0A669KBF2	P31327	CPS1	-5.67	9.19e-08	0.325
VLAACLTEK	O14756;G3V3Y9;G3V508;O75452	O75452	HSD17B6;RDH16	-7.62	9.36e-08	0.327
VYNLDFNPPHVHGIDDVTGEPLVQQEDDKPEAVAAR	P27144;A0A8I5KW96;F8VS11	P27144	AK4	-7.36	9.41e-08	0.328
SALQAIGVEAHQAVMIGDDIVGDVGGAQR	Q9H008	Q9H008	LHPP	-6.43	9.43e-08	0.328
AALDCTTAGWGSCTFIGVAAGSK	P08319	P08319	ADH4	-7.08	9.48e-08	0.328
CIAVGESDGSIWNPDGIDPK	P00367;A0A804HJD7;P49448	P00367	GLUD1;GLUD2	-7.15	9.54e-08	0.329
LFLLADEVYQDNVYAAGSQFHSFK	P24298	P24298	GPT	-5.77	9.63e-08	0.33
DSAMLLSGCSHLLHNK	P22309	P22309	UGT1A1	-6.38	9.63e-08	0.33
EVQPVELPNCNLVK	P27169;F8WF42	P27169	PON1	-7.09	9.65e-08	0.33
EENVGLHQTLDQTLNELNCI	P67936;A0A2R8YE05;K7ENT6;A0A5F9UN72;K7EPB9	P67936	TPM4	-6.64	9.65e-08	0.33
VIDIEGCAHIVHK	P32929	P32929	CTH	-7.85	9.71e-08	0.331
LNFNGEGEPEELMVDNWRPAQPLK	P00918	P00918	CA2	-6.64	9.78e-08	0.331
AHMVTLDYTVQVPGAGQDGSPGLSK	Q14749	Q14749	GNMT	-7.88	9.8e-08	0.331
LAHMEPVVAAHVGDNYLCDYQGPR	Q9BSH5	Q9BSH5	HDHD3	-6.72	9.86e-08	0.332
GSDCGIVNVNIPTSGAEIGGAFGGEK	A0A1B0GTY9;A0A1B0GW77;P49419;A0A1B0GTG2;A0A1B0GUA1;A0A1B0GW82;A0A1B0GTJ4;A0A1B0GV49	A0A1B0GW77	ALDH7A1	-7.12	9.91e-08	0.333
HVIPMNPNTNDLFNAVGDGIVLCK	P13796;Q5TBN3	P13796	LCP1	-5.93	9.95e-08	0.333
NLCSDDTPMVR	P30153;C9J9C1	P30153	PPP2R1A	-5.48	9.97e-08	0.333
NGEIHVDNIDVFCEK	Q96NU7	Q96NU7	AMDHD1	-6.19	1.01e-07	0.335
TYDATTHFETTCDDIK	P50395	P50395	GDI2	-4.96	1.02e-07	0.336
EHWSHDPFEAFK	C9JMV9;Q03154;A0A1B0GW23;A0A1B0GV31;C9JYZ0;F8WC59	Q03154	ABHD14A-ACY1;ACY1	-7.46	1.03e-07	0.336
NVNVQNFHISWK	F5GXS2;H7C144;O43707	O43707	ACTN4	-7.64	1.03e-07	0.337
LPVQTSPEGLDAAFIGVPLDTGTSNRPGAR	Q9BSE5	Q9BSE5	AGMAT	-7.17	1.03e-07	0.337
DASSQGFLPHFQHFATQAIHVGQDPEQWTSR	P32929	P32929	CTH	-7.9	1.05e-07	0.338
VNVEHMTEK	P17858	P17858	PFKL	-6.42	1.05e-07	0.338
EEAAEHIPLLFFAFPSAK	Q6NUM9;H7C3J0;H7BZ81	Q6NUM9	RETSAT	-6.21	1.05e-07	0.338
DGPLNMILDDGGDLTNLIHTK	P23526	P23526	AHCY	-6.58	1.06e-07	0.339
FGDIVPLGVTHMTSR	P10635;A0A0U1RRC6;A0A0U1RQD0;Q38LG0;A0A0G2JSD7;C1ID54;A0A1B0GU72;A0A0G2JLK7;A0A1B0GV74	P10635	CYP2D6	-6.78	1.06e-07	0.34
ELEEETGLHTGWIQNGGLFIASNR	Q5SYU9;Q9UL12;Q5SYV1;Q9UL10	Q9UL12	SARDH	-5.52	1.06e-07	0.339
EGDTMMGQQVAK	Q14914;F2Z3J9	Q14914	PTGR1	-6.74	1.08e-07	0.341
VSFLSALEEYTK	P02647;F8W696	P02647	APOA1	-7.24	1.09e-07	0.341
LEIGQDLIQVAVAQYADTVRPEFYFNTHPTK	C9JNG9;P12111	P12111	COL6A3	-6.84	1.09e-07	0.342
NAFACFDEEASGFIHEDHLR	P24844	P24844	MYL9	-6.74	1.09e-07	0.342
FYAFNPLAGGLLTGK	O95154	O95154	AKR7A3	-8.25	1.1e-07	0.343
VVPLADIITPNQFEAELLSGR	O00764;F2Z2Y4	O00764	PDXK	-5.92	1.1e-07	0.343
IGEMPLTDSILCDGLTDAFHNCHMGITAENVAK	Q9BWD1	Q9BWD1	ACAT2	-7.79	1.12e-07	0.344
DGSIDLVINLPNNNTK	P31327	P31327	CPS1	-5.22	1.12e-07	0.344
VEYHAGGSTQNSIK	P55263;A0A5K1VW54;A0A5F9ZH31;A0A5K1VW94;A0A5F9ZH72;A0A5F9ZH83	P55263	ADK	-6.04	1.14e-07	0.346
IEEACEIYAR	P54920;M0R0Y2;M0R2M1	P54920	NAPA	-5.46	1.14e-07	0.347
DHDASVYLR	Q5SYU9;Q9UL12;Q5SYV1	Q9UL12	SARDH	-7.38	1.14e-07	0.346
VHAELADVLTEAVVDSILAIK	P40227	P40227	CCT6A	-7.1	1.15e-07	0.347
AVAEIEEMCNILK	A0A6Q8PHC6;P50440;A0A6Q8PGA2;A0A6Q8PFC6;H0YMX4	A0A6Q8PHC6	GATM	-9.11	1.15e-07	0.347
LITIEINPDCAAITQR	F8WBW9;P21964;A0A7I2V370;E7EMS6;E7EUU8;A0A7I2V3G7;H7BZ45	P21964	COMT	-7.32	1.16e-07	0.348
EVDILISTALIPGK	E9PCX7;A0A590UJI3;Q13423;A0A590UK15;A0A590UJM2;A0A590UK29	Q13423	NNT	-6.82	1.17e-07	0.349
SLDFNTLVDNISVDPETGDLWVGCHPNGMK	P27169	P27169	PON1	-5.65	1.17e-07	0.349
AGESVLVHGASGGVGLAACQIAR	Q08257;A6NP24;C9JH92	Q08257	CRYZ	-7.5	1.18e-07	0.35
EPAIHSEGQWVTLPAPLDTINVHLR	P10253	P10253	GAA	-6.2	1.19e-07	0.351
LLADEYTFAFPPHHDTIK	Q9UL12;Q5SYV1	Q9UL12	SARDH	-5.63	1.19e-07	0.35
GVLHQFSGTETNK	P27144;A0A8I5KW96;F8VS11	P27144	AK4	-7.19	1.2e-07	0.351
GFSEGLWEIENNPTVK	P51858	P51858	HDGF	-6.72	1.2e-07	0.351
LGFDISEQEVTAPAPAACQILK	Q9H008;Q5T1Z0	Q9H008	LHPP	-6.12	1.2e-07	0.351
FGDEPVTK	Q9NR19	Q9NR19	ACSS2	-5.39	1.21e-07	0.352
VDINTPDVDVHGPDWHLK	Q09666	Q09666	AHNAK	-6.2	1.21e-07	0.352
SGDLFNCGSLTIR	P21953	P21953	BCKDHB	-5.83	1.21e-07	0.352
GLHVVEVTYDDVPIPNSPFK	A0A804HK76;O75369;E7EN95	O75369	FLNB	-7.61	1.22e-07	0.353
GLAPVQAYLHIPDIIK	P11498;A0A494C016;A0A494C101;A0A494C0T2;E9PRE7	P11498	PC	-7.34	1.22e-07	0.353
VIELENWTEGK	H0Y5L2;Q9NTX5;F2Z2D6;E9PJS8;J3KP84;E9PPG7;E9PRU6;E9PLY6;H0Y525	Q9NTX5	ECHDC1	-6.06	1.24e-07	0.355
FLEEHPGGEEVLR	P00167	P00167	CYB5A	-6.09	1.25e-07	0.355
VCVETVESGAMTK	P48735	P48735	IDH2	-5.63	1.25e-07	0.355
DTASLSTTPSESPR	G3V582;Q9NQX3;F5H039;H0YJ30	Q9NQX3	GPHN	-6.14	1.26e-07	0.356
SIAGFFAEPIQGVNGVVQYPK	Q9BYV1	Q9BYV1	AGXT2	-5.79	1.27e-07	0.357
GGENIYPAELEDFFHTHPK	Q96CM8;E9PF16	Q96CM8	ACSF2	-6.22	1.28e-07	0.357
SPASDQQLMEDK	P08319;D6R9K8	P08319	ADH4	-6.02	1.28e-07	0.358
TAEQVMISSR	P31513;V9GZ60	P31513	FMO3	-7.36	1.28e-07	0.358
ICDQISDAVLDAHLK	Q00266;B1ANE6	Q00266	MAT1A	-8.7	1.3e-07	0.359
QATVGDINTERPGMLDFTGK	P07108;B8ZWD1	P07108	DBI	-7.55	1.31e-07	0.359
GVILTSDRPGVFSAGLDLTEMCGR	P42126;Q96DC0;H3BS70	P42126	ECI1;DCI	-6.16	1.31e-07	0.359
LSSMDVTHAHLVNK	Q6IB77	Q6IB77	GLYAT	-7.86	1.32e-07	0.36
EEVGQYLK	Q6GMV3	Q6GMV3	PTRHD1	-5.8	1.32e-07	0.36
YNPLQDEWVLVSAHR	P07902;G3V4G9;G3V3U5;G3V223;F2Z2X9;A0A8I5KVJ6	P07902	GALT	-6.38	1.34e-07	0.361
SLPADILYEDQQCLVFR	Q9BX68	Q9BX68	HINT2	-5.61	1.34e-07	0.362
YHEEFEK	Q14847;C9J9W2	Q14847	LASP1	-7.04	1.34e-07	0.362
LFVALQGCMDK	P49748;G3V1M7	P49748	ACADVL	-5.3	1.35e-07	0.362
DLIDTYLLHMEK	P20813	P20813	CYP2B6	-5.97	1.35e-07	0.362
TKPSDEEMLFIYGHYK	P07108;B8ZWD1	P07108	DBI	-7.61	1.35e-07	0.362
QQNVDQAVATLQGEGLSVTGTVCHVGK	Q9BTZ2;Q6PKH6;F6TD35;F5GWZ1	Q9BTZ2	DHRS4;DHRS4L2	-5.6	1.35e-07	0.362
TPLYDFHLAHGGK	P48728;A0A1B0GTM2;A0A1B0GTA8;A0A1B0GWC4;A0A1B0GTV8;A0A1B0GUU7;A0A1B0GU55	P48728	AMT	-5.91	1.36e-07	0.363
TVQEHYQDFDK	P05177	P05177	CYP1A2	-7.73	1.38e-07	0.364
SYIEGYVPSQADVAVFEAVSSPPPADLCHALR	P24534;C9JZW3;F2Z2G2	P24534	EEF1B2	-6.3	1.39e-07	0.365
SGQAGYVPCNILGEARPEDAGAPFEQAGQK	Q9H6S3;A0A3B3ISQ4	Q9H6S3	EPS8L2	-5.17	1.39e-07	0.365
DHSVSLSPSLFKPEEFTPLDPTQEPIFPPELLR	P47989	P47989	XDH	-5.74	1.39e-07	0.365
ELCISYGGVGPATICAK	Q06278	Q06278	AOX1	-6.49	1.4e-07	0.366
IPLPANAPVAEQVSALHR	Q9UBR1;Q6AHZ8	Q9UBR1	UPB1;DKFZp779O1248	-6.59	1.41e-07	0.367
FRPSDEHHPEVK	Q9H008	Q9H008	LHPP	-7.48	1.42e-07	0.367
EFESVLVDAFSHVAR	Q9NQG5	Q9NQG5	RPRD1B	-6.09	1.42e-07	0.367
ITSCIFQLLQEAGIK	P22234;E9PBS1	P22234	PAICS	-5.81	1.43e-07	0.368
SNAHYNLQNAFNLAEQHLGLTK	A0A087WUZ3;F8W6C1;Q01082	Q01082	SPTBN1	-6.43	1.44e-07	0.368
DSIFSNLTGQLDYQGFEK	H0YFD6;P40939;A0A2R8Y4F5;A0A2R8YG21	H0YFD6	HADHA	-5.84	1.45e-07	0.369
SETSWESPK	E5RJU9;Q86UE4	Q86UE4	MTDH	-6.11	1.46e-07	0.369
AIDPSISWEDIK	Q9UJM8	Q9UJM8	HAO1	-7.3	1.47e-07	0.37
EYWENLR	Q93088;E5RJH0	Q93088	BHMT	-7.91	1.49e-07	0.371
TLTAVHDAILEDLVFPSEIVGK	P62081;B5MCP9;A0A2R8Y623	P62081	RPS7	-7.15	1.49e-07	0.372
RNDFQLIGIQDGYLSLLQDSGEVR	P63241;I3L397;I3L504	P63241	EIF5A	-7.68	1.5e-07	0.372
LYNTCAVFGPDGTLLAK	Q9NQR4;H7C579	Q9NQR4	NIT2	-5.97	1.5e-07	0.372
VEHQCLSSEELK	K7EJU8;K7EK30;Q9P0Z9	Q9P0Z9	PIPOX	-6.95	1.5e-07	0.372
YGINTTDIFQTVDLWEGK	P37802;X6RJP6	P37802	TAGLN2	-6.75	1.5e-07	0.372
TCPVIISSTAHYSK	Q8IYQ7	Q8IYQ7	THNSL1	-5.38	1.5e-07	0.372
YGGEGAESMMGFFHELLK	Q96HY7	Q96HY7	DHTKD1	-5.76	1.53e-07	0.374
EVGTPHGIILDSVDAAFICPGSSR	P02790	P02790	HPX	-7.01	1.53e-07	0.374
QHVTEAFQFHF	A0A286YF22;O43175;A0A286YFA2	A0A286YF22	PHGDH	-7.41	1.54e-07	0.375
MSNYDTDLFVPYFEAIQK	P49588;A0A6Q8PGN5;A0A6Q8PFY2;A0A6Q8PF33;A0A6Q8PGE8;H3BPK7;A0A6Q8PGR9;A0A6Q8PFK3;A0A6Q8PHJ2;A0A6Q8PH44;A0A6Q8PHP7;A0A6Q8PHP3;A0A6Q8PF77;A0A6Q8PG28;A0A6Q8PG62	P49588	AARS	-5.71	1.57e-07	0.376
KQDIENILHWNVTQHK	P21399	P21399	ACO1	-7.77	1.57e-07	0.376
SFKPDFGAESIYGGFLLGVR	H0YAC7;H0Y938;P35606;A0A7I2V258	H0YAC7	COPB2	-5.41	1.57e-07	0.376
KLDVTIEPSEEPLFPADELYGIVGANLK	A0A804HHS4;A0A804HJW5;D6RDF7;A0A804HIH3;A0A0S2Z5R4;A0A0D9SFE9;D6R9R1;D6RD67;A0A804HJ24;Q9HCC0;A0A804HJ84;A0A804HLJ9;A0A804HK37;A0A804HJC1;A0A804HJ31;A0A804HL02	A0A804HJ24	MCCC2	-5.72	1.57e-07	0.376
QTSGGPVDASSEYQQELER	P18859;A8MUH2	P18859	ATP5J	-5.55	1.58e-07	0.377
HTSPVFSPANPESSMEDCLAHLGEK	Q9BXK5;A0A087WX97;A0A087WTL4;E9PDD6	Q9BXK5	BCL2L13	-5.94	1.58e-07	0.377
SCYSLANQLELNPDFSRPNR	P35573	P35573	AGL	-5.61	1.59e-07	0.377
THACYEYNHIFPLLEK	P00439;J3KND8	P00439	PAH	-7.02	1.59e-07	0.377
LYPWGVVEVENPEHNDFLK	B5MCX3;H7C2Y0;Q15019	Q15019	37500	-6.1	1.6e-07	0.378
LEGELQAPDLELSLPAIHVEGLDIK	Q09666	Q09666	AHNAK	-6.05	1.6e-07	0.378
FPPVLLRPGEEYDHTTWFK	Q96C23;B8ZZ75	Q96C23	GALM	-6.08	1.62e-07	0.379
GGVDFALDCAGGSETMK	P08319	P08319	ADH4	-5.8	1.63e-07	0.38
ENIWSASEELLLR	Q13576;F5H7S7;D6R939;E9PDT6	Q13576	IQGAP2	-6.16	1.64e-07	0.38
ICDQWDNLGALTQK	A0A804HII9;A0A804HK61;A0A7I2V4Y4;A0A804HLF4;H7C5W8;A0A804HIN7;A0A804HL31;P12814	A0A804HII9	ACTN1	-5.94	1.66e-07	0.382
LNLLDLDYELAEQLDNIAEK	P12111	P12111	COL6A3	-7.72	1.66e-07	0.381
ALALHGTCTGEHGIGMGK	Q86WU2	Q86WU2	LDHD	-5.63	1.66e-07	0.381
ALSVGNIDDALQCYSEAIK	P31948;F5H783;F5GXD8	P31948	STIP1	-6.01	1.66e-07	0.381
DSYDFFTEIK	Q9H2A2	Q9H2A2	ALDH8A1	-5.83	1.67e-07	0.382
NLSQILSDREEIAHNMQSTLDDATDAWGIK	P27105	P27105	STOM	-5.67	1.68e-07	0.382
GVFPLLYR	P30613	P30613	PKLR	-7.01	1.7e-07	0.384
AFVVLASQFLSHDPEQLTK	Q08AH3;F5GWL3	Q08AH3	ACSM2A	-7.6	1.73e-07	0.385
YYVGDTMDVLFEK	P46952;C9IY88	P46952	HAAO	-6.55	1.73e-07	0.385
SIMEECGGVHIHFPVEGSGSDTVVIR	A0A024R4E5;Q00341;H0Y394;H7C2D1;H7BZC3	A0A024R4E5	HDLBP	-5.63	1.75e-07	0.386
IYFAGTETATHWSGYMEGAVEAGER	P27338	P27338	MAOB	-6.21	1.76e-07	0.387
TPEELQAER	P23141;H3BSU0	P23141	CES1	-8.28	1.78e-07	0.388
TAVIDHHNYDISDLGQHTLIVADTENLLK	P39656;A0A0C4DGS1;U3KQ84	P39656	DDOST	-7.41	1.78e-07	0.388
IIEYLVPER	O95954;A0A0G2JQF2;B7WPK3	O95954	FTCD	-5.95	1.78e-07	0.388
HIDGAYIYQNEHEVGEAIR	P51857	P51857	AKR1D1	-7.83	1.81e-07	0.389
IPVPILPGLPMNNHGNYIVR	Q16134;B4DEQ0;A0A804HL84;A0A804HJK8;A0A804HK05;A0A804HJT7;A0A804HI48;A0A804HI73	Q16134	ETFDH	-7.32	1.81e-07	0.389
HSGFCLETQNWPDAVNQPR	Q96C23;B8ZZ75	Q96C23	GALM	-5.94	1.81e-07	0.39
YQVFFFGTHETAFLGPK	P51858	P51858	HDGF	-6.88	1.81e-07	0.39
ILFDTVDLCATWEAVEK	Q04828;H0Y804;A6NHU4	Q04828	AKR1C1	-6.47	1.82e-07	0.39
EEPWVDPNSPVLLEDPVLCALAK	P52895;B4DK69;Q04828;H0Y804	Q04828	AKR1C2;AKR1C1	-7.13	1.82e-07	0.39
WTTTQYTEAK	Q9UI17;Q8TCC6	Q9UI17	DMGDH	-6.16	1.84e-07	0.391
IVSLPECFNSPYGAK	Q9NQR4;H7C579;F8WF70	Q9NQR4	NIT2	-5.72	1.85e-07	0.392
QGGFLPGGGSLHSTMTPHGPDADCFEK	Q93099	Q93099	HGD	-7.38	1.86e-07	0.392
NITDELGVLGVAGPQAR	Q9UI17;Q8TCC6	Q9UI17	DMGDH	-5.84	1.87e-07	0.393
TFYGLHQDFPSVVLVGLGK	P28838	P28838	LAP3	-6.32	1.87e-07	0.393
THNDIIHNENMR	P15311	P15311	EZR	-7.61	1.88e-07	0.393
TVIQAEIDAAAELIDFFR	P30038;Q5TF55	P30038	ALDH4A1	-5.89	1.89e-07	0.393
AGVPPGVVNIVFGTGPR	Q9H2A2	Q9H2A2	ALDH8A1	-7.7	1.89e-07	0.393
VRDEFVIRDEDVIILTYPK	Q06520	Q06520	SULT2A1	-8.33	1.89e-07	0.394
GWVTDGFSSLK	B0YIW2;P02656	B0YIW2	APOC3	-7.37	1.9e-07	0.394
FGQAICLLPER	A6NLP5	A6NLP5	TTC36	-6.34	1.9e-07	0.394
QFSGETFEEIIDCSGK	Q96NU7;H0YI62	Q96NU7	AMDHD1	-5.76	1.91e-07	0.394
DITDTLVAVTISEGAHHLDLR	P42785;E9PNF7;B7Z7Q6;A0A7P0Z451;B3KR26	P42785	PRCP	-5.06	1.92e-07	0.395
HSLPDLPYDYGALEPHINAQIMQLHHSK	P04179;F5H4R2;F5GYZ5;G5E9P6;F5GXZ9	P04179	SOD2	-8.6	1.92e-07	0.395
ALCELESGIPAAESQIVYAERPLTDNHR	Q5TDH0	Q5TDH0	DDI2	-5.12	1.93e-07	0.395
MEELHNQEVQK	A0A7I2V5Y7;Q15233;A0A7I2V535;A0A7I2V4J2;A0A7P0MRW0;A0A7I2V4K9;A0A7I2V4N2;A0A7I2V464;H7C367;C9JYS8	A0A7I2V5Y7	NONO	-5.81	1.93e-07	0.395
TLAEHQQLIPLVEK	Q9Y5K5;Q5LJA5;Q5LJA9;H0Y6Y4;H0Y4E0;H0Y636;H0Y4K0	Q9Y5K5	UCHL5	-5.95	1.96e-07	0.397
LTVPDDIAANCIYLNIPNK	O94760;B4DYP1	O94760	DDAH1	-6.19	1.97e-07	0.397
AHLMSQPLAYHTPDCNK	Q93088;E5RJH0	Q93088	BHMT	-6.77	1.98e-07	0.398
GQETSTNPIASIFAWTR	O75874	O75874	IDH1	-7.95	1.98e-07	0.398
VFEISPFEPWITR	Q16795;A0A3B3ISG8;H3BRM9;F5H0J3	Q16795	NDUFA9	-4.88	1.98e-07	0.398
YNEDLELEDAIHTAILTLK	A0A024RA52;P25787;A0A7I2YQP7;C9JCK5	A0A024RA52	PSMA2	-6.4	1.98e-07	0.398
AALDEQFEPQK	P15428;E9PBZ2;E9PD69	P15428	HPGD	-7.18	1.99e-07	0.398
FIDTSQFILNR	O60220	O60220	TIMM8A	-6.23	1.99e-07	0.398
LGVGAATHVVIYDASDQGLYSAPR	P25325;B1AH49	P25325	MPST	-7.15	2e-07	0.398
LSLLEELSLAENQLLK	P20774;Q5TBF5	P20774	OGN	-6.88	2e-07	0.399
TLESSIQGLR	Q92747	Q92747	ARPC1A	-6.27	2.01e-07	0.399
AAQIGAHTLSGACLDPGAFK	Q16134;B4DEQ0;A0A804HL84;A0A804HL81;A0A804HJK8;A0A804HK05;A0A804HJT7;A0A804HI48;A0A804HI73;A0A804HK66	Q16134	ETFDH	-6.1	2.03e-07	0.4
CEELSGLHGQLQEAR	F8W7S5;Q9P2E9	Q9P2E9	RRBP1	-5.99	2.03e-07	0.4
HVTQDIVLPDGR	P78329;A0A0A0MQR0	P78329	CYP4F2	-6.67	2.04e-07	0.4
GPVCLLAGGEPTVQLQGSGR	Q8IVS8	Q8IVS8	GLYCTK	-5.35	2.04e-07	0.4
AVGLEDQIVSQGIPMR	O15229	O15229	KMO	-5.94	2.05e-07	0.401
LNCLVAPTLFLEFHGSQQALEEQLQR	Q86WU2	Q86WU2	LDHD	-5.9	2.05e-07	0.401
NPESNYCLK	D6RHZ6;V9HW50;P00325;P07327;P00326;A0A087WU81;A0A087WUC4	V9HW50	ADH1B;HEL-S-117;ADH1A;ADH1C	-5.69	2.06e-07	0.401
QDLVISLLPYVLHPLVAK	Q9UDR5;F8WAH1;A0A7P0TAY5;A0A7P0TA62;A0A7P0TA09;A0A7P0T8W7;A0A7P0Z428;A0A7P0TBD2;A0A7P0TB07;A0A7P0Z402	Q9UDR5	AASS	-6.13	2.07e-07	0.402
GTIVLASPGWTTHSISDGK	Q14914;F2Z3J9;Q5JVP2	Q14914	PTGR1	-7.66	2.07e-07	0.402
DVPAVEITHTFWER	P21397;A0A8I5KUC3;A0A8I5KP93	P21397	MAOA	-6.74	2.08e-07	0.402
YTEHSTVGLAQQWDQLDQLGMR	A0A0D9SF54;A0A0D9SGF6;Q13813	Q13813	SPTAN1	-6.19	2.08e-07	0.402
MTNGFSGADLTEICQR	A0A7P0T8A3;C9JUP7;P55072;A0A7P0TAW3;A0A7I2V540;A0A7P0TAQ1	P55072	VCP	-5.65	2.08e-07	0.402
IQLEHHISPGDFPDCQK	Q9NZN4	Q9NZN4	EHD2	-4.95	2.1e-07	0.403
SGLFVVGPESAGAHPGPACYR	O14841	O14841	OPLAH	-6.41	2.11e-07	0.403
HLPLPDLQEVK	Q9UBR1;Q6AHZ8;F8WC94	Q9UBR1	UPB1;DKFZp779O1248	-7.89	2.12e-07	0.404
SQDIPFVSTDIINTLK	A0A0D9SG04;A0A0X1KG75;Q53SF7	A0A0D9SG04	COBLL1	-5.2	2.13e-07	0.404
ELCHTQSSHASLR	F8W7S5;Q9P2E9	Q9P2E9	RRBP1	-7.74	2.13e-07	0.404
SQPSAGPQLNALPDHSPLLQPGLAALR	P49638	P49638	TTPA	-5.78	2.14e-07	0.404
VCLIGCGFSTGYGSAVK	P00326;A0A087WU81;A0A087WUC4	P00326	ADH1C	-7.11	2.15e-07	0.405
LEAVSHTSDMHR	Q01518;Q5T0R1;Q5T0R4;Q5T0R3;Q5T0R7;Q5T0R6;Q5T0R5;Q5T0S3;Q5T0R8;Q5T0R2;Q5T0R9	Q01518	CAP1	-7.02	2.16e-07	0.405
DGSELILHFVTQCNTR	O75208;H3BNT2;H3BSJ5;H3BPY0;H3BPC6	O75208	COQ9	-5.31	2.17e-07	0.406
TFGSGEADCGLRPLFEK	P00734;E9PIT3	P00734	F2	-5.69	2.18e-07	0.406
ELLLPNWQGSGSHGLTIAQR	Q09666;E9PKR9;E9PLK4;E9PJZ0;E9PJC6;E9PQE3	Q09666	AHNAK	-6.02	2.19e-07	0.407
DGGIPADPNNVFLSTGASDAIVTVLK	P24298	P24298	GPT	-6.6	2.19e-07	0.406
NKPDNGGFTSVDDAHFLVR	P42357;F8VNX0;Q4VB95	P42357	HAL	-5.73	2.19e-07	0.406
DNYFMTQNER	Q99424;C9J0G0;C9JY29	Q99424	ACOX2	-5.79	2.2e-07	0.407
EGEEKPPLSAETQWK	Q9UI17;E5RG50;E5RK15	Q9UI17	DMGDH	-6.29	2.2e-07	0.407
EECALEIIK	P28845;A0A0A0MQV1	P28845	HSD11B1	-7.43	2.2e-07	0.407
VHACGVNPVETYIR	Q08257;A6NP24;C9JH92	Q08257	CRYZ	-5.53	2.21e-07	0.407
TEEELLETTLK	P23141;H3BSU0	P23141	CES1	-5.37	2.23e-07	0.408
MSMPEALAAATINAAYALGK	Q96NU7	Q96NU7	AMDHD1	-7.2	2.24e-07	0.408
TIPMDGQHFCFTR	P30837	P30837	ALDH1B1	-7.12	2.28e-07	0.41
LPLEHLVEEQVAAVTFVPVSK	A0A0A0MQU4;Q96I15	Q96I15	SCLY	-5.81	2.38e-07	0.415
HVLGVPLDDRK	P11168;A0A0C4DH64	P11168	SLC2A2	-7.86	2.42e-07	0.417
EAVCEVALDYK	A0A087WUZ3;Q01082	Q01082	SPTBN1	-5.12	2.42e-07	0.417
HLPTLDHPIIPADYVAIK	P31327	P31327	CPS1	-6.59	2.44e-07	0.418
TLTIDCVQFQR	P23786;A0A1B0GVF3;A0A1B0GTB8;A0A1B0GWC0;A0A1B0GV75	P23786	CPT2	-5.96	2.44e-07	0.418
NDFQLIGIQDGYLSLLQDSGEVR	P63241;I3L397;I3L504	P63241	EIF5A	-6.32	2.44e-07	0.418
VFIMDSCDELIPEYLNFIR	P08238	P08238	HSP90AB1	-5.76	2.46e-07	0.419
LIFPYVELDLHSYDLGIENR	O75874;C9J4N6;C9JLU6;C9JJE5	O75874	IDH1	-8.03	2.47e-07	0.419
ITVVQEVDTVEICGALK	P21695	P21695	GPD1	-6.33	2.48e-07	0.42
GGAAGGGYSQVIPMEEFNLHLTGDIHAITAANNLVAAAIDAR	A0A494C1T2;P11586;V9GYY3;F5H2F4;V9GZ78	P11586	MTHFD1	-6.45	2.48e-07	0.42
ASDVVLGFAELEGYLQK	Q96C23;H7C320	Q96C23	GALM	-6.98	2.49e-07	0.42
TCLLNETGDEPFQYK	P15104;A0A2R8YDT1	P15104	GLUL	-6.68	2.49e-07	0.42
ELIPNIPFQMLLR	P11498	P11498	PC	-7.09	2.49e-07	0.42
ELDTVIGR	P05177	P05177	CYP1A2	-7.15	2.51e-07	0.421
TLTLVDTGIGMTK	P08238	P08238	HSP90AB1	-7.34	2.52e-07	0.422
DVWGIEGPIDAAFTR	P04004;CON__Q3ZBS7	P04004	VTN	-6.24	2.54e-07	0.423
DFFNYLPLSSQDPAPVR	E9PDR0;P05166;C9JQS9;E7EX59;E7ETT1;E7ETT4;E7EUY3;E9PEC3;F8WBI9;E7ENC1	E9PDR0	PCCB	-5.3	2.55e-07	0.423
LCTSATESEVAR	P31930	P31930	UQCRC1	-6.39	2.55e-07	0.423
TATPQNFSNYESMK	Q53FZ2;H3BVD5;H3BT38;H3BR33	Q53FZ2	ACSM3	-5.37	2.57e-07	0.424
ILGEGIAASPEHIDVVYLHGYGWPR	Q08426	Q08426	EHHADH	-6.98	2.59e-07	0.424
HAMNLEAVNTYEGTHDIHALILGR	Q92947	Q92947	GCDH	-8.61	2.59e-07	0.425
AALANLCIGDVITAIDGENTSNMTHLEAQNR	O00151	O00151	PDLIM1	-5.58	2.59e-07	0.424
LEVPDMNIR	Q09666	Q09666	AHNAK	-5.06	2.62e-07	0.426
SNFLNCYVSGFHPSDIEVDLLK	P61769	P61769	B2M	-7.2	2.62e-07	0.426
IGVVVGNCFGFVGNR	Q08426	Q08426	EHHADH	-5.9	2.62e-07	0.426
SIGVSNFNCR	P17516	P17516	AKR1C4	-7.6	2.65e-07	0.427
HPQELLASADFQPVPSIVGVNNNEFGWLIPK	O00748;J3QSC0	O00748	CES2	-6.35	2.68e-07	0.428
HLAPFLPNHPVISLK	P23378;A0A1W2PP74;A0A1W2PPB1;A0A1W2PQV3	P23378	GLDC	-6.99	2.69e-07	0.429
VVVHPLVLLSVVDHFNR	P51665;H3BNT7;H3BTM8;H3BQV2	P51665	PSMD7	-5.96	2.71e-07	0.43
VIPLYAPLCR	P08319;D6R9K8;D6RIB1	P08319	ADH4	-9.29	2.72e-07	0.43
LPEDPLLSGLLDSPALK	P49327;A0A0U1RQF0	P49327	FASN	-6.9	2.72e-07	0.43
TDQVIQSLIALVNDPQPEHPLR	A0A1B0GUS4;P68036	P68036	UBE2L3	-6.18	2.72e-07	0.43
VVCVGMNYVDHCK	Q96GK7;Q6P2I3;C9JGM0	Q96GK7	FAHD2A;FAHD2B	-6.56	2.73e-07	0.43
YGYEIPVDMLCK	P60900;G3V295;G3V5Z7;G3V3I1	P60900	PSMA6	-6.29	2.75e-07	0.431
NFEHLIPDAPELIHDFLVNEK	P53618;E9PP73	P53618	COPB1	-6.16	2.77e-07	0.432
DVFNQLLIHAALNCTSSVHK	Q5R3I4;H7C089	Q5R3I4	TTC38	-6.47	2.77e-07	0.432
NYCNIQVTK	P48444;B0YIW6	P48444	ARCN1	-5.38	2.79e-07	0.432
VCLLGCGFSTGYGAAINNAK	P08319;D6R9K8;D6RIB1;H0Y9N0	P08319	ADH4	-8.42	2.8e-07	0.433
GRPDLYTSTLITDGQSLTFSTDSGPVWAAR	P05177	P05177	CYP1A2	-5.62	2.81e-07	0.433
GAVVGIDLGTTNSCVAVMEGK	P38646;D6RCD7;A0A7I2V2S7;A0A7I2V3F7;H0Y8K0;A0A3B3ITI4	P38646	HSPA9	-5.53	2.82e-07	0.434
VLFLLGADGGCITR	P28331;B4DJ81	P28331	NDUFS1	-6.04	2.82e-07	0.434
MSLDPADLTHDTTGLTAK	Q9UMX5	Q9UMX5	NENF	-4.82	2.83e-07	0.434
HVGFATIPR	P11509;Q16696	P11509	CYP2A6;CYP2A13	-6.66	2.84e-07	0.434
WVDGTDYETGFK	P07306;J3QSZ2;K7EPS5;I3L129	P07306	ASGR1	-5.41	2.85e-07	0.435
EVAAFAQFGSDLDAATQQLLSR	P25705	P25705	ATP5A1	-6.13	2.88e-07	0.436
TEEIVQQNGASDFSWAK	Q86WU2	Q86WU2	LDHD	-5.33	2.89e-07	0.436
SALSGHLETVILGLLK	H0YMT9;P07355;H0YMW4;H0YN42;H0YM50;H0YMU9;H0YMD0;A6NMY6;H0YNB8;H0YKS4;H0YNP5;A0A7I2V4P4;H0YMM1;H0YKX9;H0YLV6;H0YKZ7;H0YKL9	P07355	ANXA2;ANXA2P2	-7.39	2.92e-07	0.437
KLEGDSTDLSDQIAELQAQIAELK	P35579;A0A8I5KWT8	P35579	MYH9	-5.95	2.92e-07	0.437
SFEEIAAEFQK	P11168	P11168	SLC2A2	-5.49	2.92e-07	0.438
ACHLVHDFTDAVIQER	Q9HBI6;F8W978	Q9HBI6	CYP4F11	-5.69	2.96e-07	0.439
SEFYANEACK	Q86TX2;G3V4F2;A0A087WT95;P49753	A0A087WT95	ACOT1;ACOT2	-5.77	2.98e-07	0.44
ACLDTAVENMPSLK	P49327;A0A0U1RQF0	P49327	FASN	-6.28	2.99e-07	0.44
GGTESDLTVSR	Q9UL12;Q5SYV2	Q9UL12	SARDH	-6.51	3.03e-07	0.441
SMSAPVIFDR	O60749;D6RC15	O60749	SNX2	-5.34	3.03e-07	0.441
LLEETGICVVPGSGFGQR	P24298;Q8TD30	P24298	GPT;GPT2	-6.3	3.04e-07	0.442
DQNFLTLMK	P10632;B7Z1F5;G3V188;A0A0D9SG51	P10632	CYP2C8	-7.18	3.1e-07	0.444
DPNPMHIDATFNIIGPGIVLSNPDRPCHQIDLFK	A0A6Q8PHC6;P50440;A0A6Q8PGA2;A0A6Q8PFC6	A0A6Q8PHC6	GATM	-8.28	3.1e-07	0.444
LNAGEIVIGDGGFVFALEK	Q93088;E5RJH0	Q93088	BHMT	-8.27	3.12e-07	0.445
ICDPGLTAFEPEALGNLVEGMDFHR	D6R938;Q13557;H0Y9J2;H0Y9C2;E9PBG7;E9PF82	D6R938	CAMK2D	-5.01	3.12e-07	0.444
WLPELVEHAK	Q02252;G3V4Z4	Q02252	ALDH6A1	-7.92	3.15e-07	0.445
FLPCSSYIDSYDPSTGEVYCR	Q9H2A2	Q9H2A2	ALDH8A1	-5.27	3.15e-07	0.445
AHDGGIYAISWSPDSTHLLSASGDK	O75083	O75083	WDR1	-6.67	3.15e-07	0.446
HYQINQQWER	P02751	P02751	FN1	-5.8	3.17e-07	0.446
SVAGEIVLITGAGHGIGR	Q7Z5P4	Q7Z5P4	HSD17B13	-7.76	3.19e-07	0.447
ITYEELPAIITIEDAIK	P47989	P47989	XDH	-5.77	3.19e-07	0.447
ENIQVFEFQLTSEDMK	P17516	P17516	AKR1C4	-7.28	3.22e-07	0.448
FSVPAGIVIPSFQALTAR	P04114	P04114	APOB	-5.61	3.25e-07	0.449
FACNGTVIEHPEYGEVIQLQGDQR	O60739;K7EQP2;P41567;K7EM18	P41567	EIF1B;EIF1	-5.47	3.25e-07	0.449
EPIPVLPTVHYNMGGIPTNYK	P31040;D6RFM5	P31040	SDHA	-6.77	3.28e-07	0.45
DQTASAPATPLVNK	A0A0D9SG04;A0A0B4J1Z0;A0A0X1KG75;Q53SF7	A0A0D9SG04	COBLL1	-5.16	3.29e-07	0.45
NAFYIGSYQQCINEAQR	O14579;M0QXB4;M0R061	O14579	COPE	-5.11	3.35e-07	0.452
GHTACADAYLTPAIQR	O14841	O14841	OPLAH	-5.55	3.37e-07	0.452
FPSLPILSPALMDVPYR	P35573	P35573	AGL	-5.92	3.38e-07	0.453
DQHDLTYGPFTTEGHHWYQLR	Q02318;C9J1K5	Q02318	CYP27A1	-5.26	3.39e-07	0.453
DTPGLHIGKPENK	P45954	P45954	ACADSB	-5.85	3.4e-07	0.453
LPIFIADAFTAR	P30039	P30039	PBLD	-7.34	3.41e-07	0.454
AFAISGPFNVQFLVK	P31327	P31327	CPS1	-6.93	3.42e-07	0.454
TSACFEPSLDYMVTK	P31327;A0A669KBF2	P31327	CPS1	-6.31	3.44e-07	0.454
KEDALLYQSK	P50402;A0A804HIV7;Q5HY57;A0A804HLA2	P50402	EMD	-5.14	3.46e-07	0.455
HHGPQTLYLPVTLSSIPVFQR	E9PKU7;Q14697;F5H6X6	Q14697	GANAB	-6.92	3.46e-07	0.455
AYNYVAQEVDDYHAFQTLTHIYNK	Q9NYU2	Q9NYU2	UGGT1	-5.38	3.47e-07	0.455
EPAPDSGLLGLFQGQNSLLH	Q96AB3	Q96AB3	ISOC2	-6.59	3.49e-07	0.456
MTDQEAIQDLWQWR	A0A7I2YQC0;P06748;A0A7I2V5S2;A0A7I2V4G8;E5RI98;A0A7I2V5J8	A0A7I2YQC0	NPM1	-7.04	3.53e-07	0.457
YNLSPSIFFCATPPDDGNLCR	Q00796;A0A6I8PIS1	Q00796	SORD	-7.2	3.53e-07	0.457
AENACVPPFTIEVK	A0A6Q8PHC6;P50440;A0A6Q8PGA2;A0A6Q8PFC6;H0YKW9;A0A6Q8PF48	A0A6Q8PHC6	GATM	-6.27	3.58e-07	0.459
GDFWLLGDR	Q08AH3;F5GWL3;Q68CK6;H3BTX9;H3BP39	Q68CK6	ACSM2A;ACSM2B	-7.25	3.59e-07	0.459
DTVLGFR	P14920;F8W152	P14920	DAO	-5.07	3.59e-07	0.459
DCPVSSYNEWDPLEEVIVGR	A0A6Q8PHC6;P50440;A0A6Q8PGA2;A0A6Q8PFC6;H0YKW9;A0A6Q8PF48	A0A6Q8PHC6	GATM	-7.27	3.59e-07	0.459
TELENFIMQQIK	P16662;E9PBP8;A0A087X084	P16662	UGT2B7	-6.72	3.59e-07	0.459
VVDNPIYLSDMGAALTGAESHELQDVLEETNIPK	K7EKE6;P36776;K7EJE8	K7EKE6	LONP1	-6.09	3.61e-07	0.46
IEGIQNMPNVR	Q5SYU9;Q9UL12;Q5SYV1	Q9UL12	SARDH	-6.15	3.61e-07	0.46
NASTFEDVTQVSSAYQK	Q14247	Q14247	CTTN	-5	3.62e-07	0.46
HSQDLAFLSMLNDIAAVPATAMPFR	P49327;A0A0U1RQF0	P49327	FASN	-6.81	3.63e-07	0.46
EFYGQTETGLTCMVSK	Q68CK6;H3BTX9;A0A087WU25	Q68CK6	ACSM2B	-5.88	3.64e-07	0.46
VDASVAVFCEIQNTLINTLIR	P45954	P45954	ACADSB	-5.58	3.65e-07	0.461
KVESFEEVAR	P14920;F8VV35;F8W152	P14920	DAO	-6.04	3.66e-07	0.461
EDIDTAMK	A0A0D9SFP2;A0A1W2PNM1;A0A1W2PQ78;Q16836;E9PF18;A0A0A0MSE2;A0A804HLB5	Q16836	HADH	-7.83	3.67e-07	0.461
APEVNLNAPDVDVHGPDWNLK	Q09666	Q09666	AHNAK	-6.02	3.72e-07	0.463
GHPLGATGLAQCAELCWQLR	P22307	P22307	SCP2	-6.77	3.73e-07	0.463
VDLFYLHMPDHSTPVEETLR	O95154	O95154	AKR7A3	-7	3.78e-07	0.464
YVWLVYEQDRPLK	P30086	P30086	PEBP1	-9.26	3.78e-07	0.464
TTTSAVMVHCLR	P23141	P23141	CES1	-6.69	3.79e-07	0.464
YFILPDSLPLDTLLVDVEPK	P62314;J3QLI9	P62314	SNRPD1	-5.63	3.82e-07	0.465
CPETLFQPSFIGMESAGIHETTYNSIMK	P62736;P63267;P68032;P68133;A6NL76	P68032	ACTA2;ACTG2;ACTC1;ACTA1	-6.09	3.83e-07	0.466
DMVTELFDPLVQGEVQHR	Q9BXV9	Q9BXV9	C14orf142	-4.76	3.84e-07	0.466
FSDLLPMGVPHIVTQHTSFR	P20813;M0QZJ2	P20813	CYP2B6	-6.49	3.86e-07	0.466
VYCGHEYTINNLK	H3BPQ4;Q16775;H3BPK3	Q16775	HAGH	-7.06	3.87e-07	0.467
SLDNNYSTPNER	A0A669KB05;A0A804HK15;A0A804HIL4;C9JZR2;H0YC95;O60716	C9JZR2	CTNND1	-5.91	3.88e-07	0.467
EAFSLFDK	P0DP25;P0DP24;P0DP23;E7EMB3;M0QZ52;F8WBR5;G3V479;P27482	P0DP25	CALM2;CALM3;CALM1;CALML3	-7.62	3.92e-07	0.468
EYAQNIWNVEPSDLK	P06737	P06737	PYGL	-6.51	3.92e-07	0.468
HPYFYAPELLFFAK	CON__P02768-1;P02768;A0A0C4DGB6;B7WNR0;H0YA55;D6RHD5;H7C013	CON__P02768-1	ALB	-9.57	3.94e-07	0.468
ADHDALLFHLK	P07307;Q7Z4G9	P07307	ASGR2;HBXBP	-6.06	3.96e-07	0.469
DFLIPIAWYEDR	Q93099;H7C576	Q93099	HGD	-6.72	3.97e-07	0.469
SLSNVIAHEISHSWTGNLVTNK	P09960	P09960	LTA4H	-6.28	3.97e-07	0.469
SAVENCQDSWR	P52209	P52209	PGD	-5.64	3.97e-07	0.469
HLYTLDGGDIINALCFSPNR	P63244;J3KPE3;D6RAC2;D6REE5;H0Y8W2;D6R9Z1;D6R9L0;H0YAF8;H0YAM7;H0Y8R5;D6RF23	P63244	GNB2L1	-6.77	3.99e-07	0.47
MGLVDQLVEPLGPGLKPPEER	H0YFD6;P40939;A0A2R8Y4F5;A0A2R8YG21;A0A2R8Y688	H0YFD6	HADHA	-7.54	4.04e-07	0.471
ADFAQACQDAGVR	P11498;A0A494C016;A0A494C101;A0A494C0T2;E9PRE7	P11498	PC	-7.19	4.04e-07	0.471
WLPQNDLLGHPK	A0A0G2JMZ5;A0A804HJ67;O75795;P54855	O75795	UGT2B17;UGT2B15	-8.26	4.07e-07	0.472
GAAGGAEQPGPGGR	Q99447;I3L1R7;I3L1L9;I3L2Q1;I3L102	Q99447	PCYT2	-6.79	4.09e-07	0.472
FCFTPHTEEGCLSER	P49327;A0A0U1RQF0	P49327	FASN	-6.42	4.1e-07	0.472
EWPSNLDLR	P31327;A0A669KBF2	P31327	CPS1	-7.45	4.13e-07	0.473
VAFFVGGYCVSK	O14756	O14756	HSD17B6	-6.2	4.13e-07	0.473
VQEEAHCLVEELRK	P10632;B7Z1F5;G3V188;A0A0D9SG51	P10632	CYP2C8	-6.77	4.14e-07	0.473
AEGGLWLR	P78329;A0A0A0MQR0;Q08477;Q9HBI6;Q9HCS2;V9GYP6	Q9HBI6	CYP4F2;CYP4F3;CYP4F11;CYP4F12	-5.94	4.14e-07	0.473
IFCLDGVK	P40261	P40261	NNMT	-5.48	4.15e-07	0.474
TLEPEELNLILK	Q06520	Q06520	SULT2A1	-4.78	4.16e-07	0.474
EALPAFRPEANPLTWK	Q9UDR5;A0A7P0TAY5;A0A7P0TA62	Q9UDR5	AASS	-5.8	4.18e-07	0.474
HLGTLAGSQIR	Q06278	Q06278	AOX1	-8.79	4.19e-07	0.475
LSALGNVTTCNDYVALVHPDLDRETEEILADVLK	P56537	P56537	EIF6	-5.27	4.2e-07	0.475
STAAMSTYTGIFTDQVLSVLK	K7ER74;P02655;V9GYJ8	K7ER74	APOC4-APOC2;APOC2	-5.72	4.22e-07	0.475
DTTALSFFHMLNGAALR	A0A804HHY9;A0A804HJH8;A0A804HK02;C9JCA9;B8ZZ38;A0A804HLK8;A0A804HIG4;P42704;A0A804HI14;A0A804HKJ0;A0A804HL40;A0A804HK30;A0A804HIN4;A0A804HKI2;A0A804HKR3;A0A804HLG8;A0A804HIQ7;A0A804HI40;A0A804HJI0	A0A804HIG4	LRPPRC	-5.37	4.26e-07	0.476
VLGLVLLR	P14678;J3QLE5;P63162	P14678	SNRPB;SNRPN	-5.6	4.27e-07	0.476
LNHPVTHVDQSSDNIIIETLNHEHYECK	P21397;A0A8I5KUC3;A0A8I5KP93	P21397	MAOA	-6.64	4.29e-07	0.477
KPVPPSPEDLSVICFTSGTTGDPK	Q9ULC5;A0A8C8L3F5	Q9ULC5	ACSL5	-5.84	4.31e-07	0.477
IHLDDANESDHFENIQSTNWQTMR	A0A2R8YEL6;A0A2R8Y648;P48506;B4E2I4;E1CEI4	P48506	GCLC	-5.48	4.38e-07	0.479
EPSAPSIPTPAYQSSPAGGHAPTPPTPAPR	Q8WUM4	Q8WUM4	PDCD6IP	-5.28	4.4e-07	0.479
AAPLDSIHSLAAYYIDCIR	P49327;A0A0U1RQF0	P49327	FASN	-6.28	4.44e-07	0.48
LDLNLCQQVNDVWNFK	Q9UBR1	Q9UBR1	UPB1	-5.95	4.44e-07	0.48
MAGSVPPSLQLQNLAALGER	A6ND91	A6ND91	ASPDH	-6.15	4.45e-07	0.481
TAIGNTLVQDICYSPDTQK	P30039;A0A0C4DFS0	P30039	PBLD	-6.32	4.46e-07	0.481
EMQNLSFQDCYSSK	P30084	P30084	ECHS1	-5.34	4.48e-07	0.481
VFLQQLEVFMK	Q93088	Q93088	BHMT	-6.32	4.49e-07	0.481
ASPDQNASTHTPQSSVK	Q14677;H0YD52	Q14677	CLINT1	-5.76	4.51e-07	0.482
FDVSSFNPHGISTFTDEDNAMYLLVVNHPDAK	P27169	P27169	PON1	-6.49	4.51e-07	0.482
VDISAPDVDVHGPDWHLK	Q09666	Q09666	AHNAK	-5.54	4.52e-07	0.482
VMQEEIFGPILPIVPVK	P51648;A0A5F9ZHN9;A0A5F9ZHI5;J3QRD1;A0A5F9ZGX4;A0A5F9ZI12;A0A5K1VW72;A0A5F9ZHP6	P51648	ALDH3A2	-5.87	4.52e-07	0.482
VSGAQEMVSSAK	K7ERZ3;O60664;K7EL96;K7ER39	O60664	PLIN3	-5.43	4.56e-07	0.483
INEAVELMK	P28332	P28332	ADH6	-6.85	4.61e-07	0.484
REDIFYCGK	P51857	P51857	AKR1D1	-6.95	4.62e-07	0.484
INMAHLCIVGSHAVNGVAK	P06737;E9PK47	P06737	PYGL	-7.24	4.65e-07	0.485
EHVPSGQFPDTEAPATSETSNSR	O95210	O95210	STBD1	-6.3	4.65e-07	0.485
GATTNICYNVLDR	Q9NR19;C9JY31;F8WCJ4;C9IYL0;B4DEH9;C9J7L5;C9JXD9;F8WDJ9	Q9NR19	ACSS2	-5.13	4.66e-07	0.485
AGEYEALPK	O95954;A0A0G2JQF2;B7WPK3	O95954	FTCD	-4.55	4.66e-07	0.485
VNHLYSDLSDALVIFQLYEK	P13796	P13796	LCP1	-6.3	4.67e-07	0.485
GIIFNNGPTWK	P05181	P05181	CYP2E1	-6.17	4.68e-07	0.485
AYSEALAAFGNGALFVEK	P11498;A0A494C016;A0A494C101;A0A494C0T2;E9PRE7	P11498	PC	-5.7	4.7e-07	0.486
VLDYQTQQQK	Q99424;C9J0G0	Q99424	ACOX2	-4.68	4.71e-07	0.486
KGDVVHCWYTGTLQDGTVFDTNIQTSAK	Q00688	Q00688	FKBP3	-5.79	4.76e-07	0.487
TIEEYAVCPDLK	P36871;A0A3B3ITK7	P36871	PGM1	-5.08	4.77e-07	0.487
WLPQNDLLGHPMTR	P22310;B5MCT4;O60656;Q9HAW9;Q9HAW8;P19224;P22309;P35503;Q9HAW7	P19224	UGT1A4;UGT1A6;UGT1A9;UGT1A8;UGT1A10;UGT1A1;UGT1A3;UGT1A7	-7.72	4.79e-07	0.488
ILSCGEVIHVK	Q9H2U2;H0Y9D8;D6R967;D6RGV9	Q9H2U2	PPA2	-6.29	4.8e-07	0.488
LNIISNLDCVNEVIGIR	P30154;H0YDG7;P30153;B3KQV6	P30153	PPP2R1B;PPP2R1A	-5.34	4.82e-07	0.488
IAALQAFADQLIAAGHYAK	A0A0D9SF54;A0A0D9SGF6;Q13813	Q13813	SPTAN1	-7.18	4.82e-07	0.488
EGDYYVLNGSK	P45954	P45954	ACADSB	-7.46	4.83e-07	0.489
SYLAPGLLQGQVAIVTGGATGIGK	Q9BY49;B4DJS2	Q9BY49	PECR	-5.67	4.83e-07	0.489
WNPEALPSNTGEVNFQSGIIAAR	P35573	P35573	AGL	-5.79	4.84e-07	0.489
TFCQLILDPIFK	P13639	P13639	EEF2	-7.3	4.85e-07	0.489
EHGVGGVSQCPEPGLR	Q9C0C2	Q9C0C2	TNKS1BP1	-4.82	4.88e-07	0.489
VVVLCGHDAVR	P11509;P20853	P11509	CYP2A6;CYP2A7	-7.36	4.93e-07	0.491
LHEAFSPVSYQHDLALLR	P00748	P00748	F12	-5.66	4.99e-07	0.492
YHFPIQFEDVYNALR	P22760;C9K0E9	P22760	AADAC	-6.31	5.01e-07	0.492
SHTSEGAHLDITPNSGAAGNSAGPK	Q92597;E7ESM1;E5RJY1	Q92597	NDRG1	-5.71	5.05e-07	0.493
HIEVQILGDQYGNILHLYER	P11498;A0A494C016;A0A494C101;A0A494C0T2;E9PRE7	P11498	PC	-7.2	5.07e-07	0.493
DLLDTVLPHLYNETK	Q86VP6;A0A0C4DGH5	Q86VP6	CAND1	-5.64	5.08e-07	0.493
VLVCGAGPIGMVTLLVAK	Q00796;A0A6I8PIS1	Q00796	SORD	-6.62	5.11e-07	0.494
LTFFNSTLNTSGLVPEGDALPIPGAHRPGVVTK	O75891	O75891	ALDH1L1	-8.27	5.12e-07	0.494
VDHTVGWPLDR	Q16134;B4DEQ0;A0A804HL81;A0A804HJK8;A0A804HK05;A0A804HI48;A0A804HI73;A0A804HI80;A0A804HI70	Q16134	ETFDH	-6.93	5.12e-07	0.494
MEYDGILIAGGPGNPALAEPLIQNVR	P31327	P31327	CPS1	-9.44	5.13e-07	0.494
AVEILAQEMMTDLPSSFEEK	P22307;E9PLD1;H0YCB0	P22307	SCP2	-5.29	5.14e-07	0.495
DCGATWVVLGHSER	P60174;U3KPZ0;U3KQF3;U3KPS5	P60174	TPI1	-6.41	5.17e-07	0.495
EPLPPIQQHIWNMLNPPAEVTTK	P13010	P13010	XRCC5	-5.12	5.2e-07	0.496
FELSCYSLAPQIK	P00966;Q5T6L6	P00966	ASS1	-7.52	5.24e-07	0.496
EISLWFKPEELVDYK	Q32Q12;P22392	Q32Q12	NME1-NME2;NME2	-7.55	5.24e-07	0.496
VAAASGHCGAFSGSDSSR	A0A494C0Y9;Q9NZB2	Q9NZB2	FAM120A	-4.54	5.26e-07	0.497
GVGAAATAVTQALNELLQHVK	Q9Y490	Q9Y490	TLN1	-7.79	5.27e-07	0.497
ISIIPQDPILFPGSLR	A0A0G2JMG3;A0A1W2PPQ8;O95255	A0A0G2JMG3	ABCC6	-4.79	5.29e-07	0.497
VDINAPDVDVHGPDWHLK	Q09666	Q09666	AHNAK	-5.74	5.29e-07	0.497
VLVLGSGYISEPVLEYLSR	Q9UDR5;F8WAH1;F8WE53;A0A7P0TA62;A0A7P0TA09;A0A7P0T8W7;A0A7P0Z428;A0A7P0TB07	Q9UDR5	AASS	-5.56	5.32e-07	0.498
VDIDVPDVNVQGPDWHLK	Q09666	Q09666	AHNAK	-5.65	5.34e-07	0.498
IHQFLSEQFLESEQK	Q8TDB6	Q8TDB6	DTX3L	-4.72	5.34e-07	0.498
MSNYSLLSVDYVVDK	Q06520	Q06520	SULT2A1	-7.02	5.34e-07	0.498
CDFPIMK	Q04760	Q04760	GLO1	-5.8	5.44e-07	0.5
MFHGIQDYEENK	O14832;B1ALH6;C9IYS5	O14832	PHYH	-5.5	5.47e-07	0.5
KIEFVLNLPK	Q08AH3;F5GWL3;Q68CK6;H3BTX9;H3BP39	Q68CK6	ACSM2A;ACSM2B	-7.19	5.48e-07	0.5
ELLSGPNR	P36871;A0A3B3ITK7	P36871	PGM1	-4.72	5.48e-07	0.5
NVVAVGAGFCDGLGFGDNTK	P21695	P21695	GPD1	-5.8	5.49e-07	0.501
WVQQNIAHFGGNPDR	O00748	O00748	CES2	-5.6	5.5e-07	0.501
GPGTSFEFALAIVEALNGK	Q99497;K7ELW0;K7EN27	Q99497	PARK7	-8.19	5.51e-07	0.501
QFQSLDTTMR	O95954;A0A0G2JQF2;B7WPK3	O95954	FTCD	-7.25	5.58e-07	0.502
LDENSAFLQFNWK	A0A0D9SF54;A0A1B0GV13;A0A0D9SGF6;Q13813	Q13813	SPTAN1	-5.32	5.58e-07	0.502
AHLTVGQAAAGGSGNLLTER	Q99959	Q99959	PKP2	-4.78	5.6e-07	0.502
YVFITGCDSGFGNLLAR	O14756;G3V3Y9;G3V508	O14756	HSD17B6	-5.62	5.65e-07	0.503
LPPVQVAMDSLVK	Q8IWW8;E5RFL4;B4DV11;B4DFI7	Q8IWW8	ADHFE1	-4.82	5.7e-07	0.504
HLVPGAPFLLQALVR	P0C0L4;P0C0L5;F5GXS0;A0A0G2JPR0;A0A140TA49	P0C0L5	C4A;C4B	-5.14	5.7e-07	0.504
YSAGWDAK	O14756;O75452	O75452	HSD17B6;RDH16	-7.41	5.7e-07	0.504
VPSYTLILPSLELPVLHVPR	P04114	P04114	APOB	-5.72	5.71e-07	0.504
HYFQNTQGLIFVVDSNDR	P84085;C9J1Z8;F5H423;F5H0C7;P61204;P84077;P18085;C9JAK5;C9JPM4	P84077	ARF5;ARF3;ARF1;ARF4	-5.91	5.71e-07	0.504
FGIEPNAELIYEVTLK	Q13451	Q13451	FKBP5	-4.64	5.71e-07	0.504
EGSVVVDLAAEAGGNFETTKPGELYIHK	E9PCX7;A0A590UJI3;Q13423;A0A590UK15;A0A590UJM2;A0A590UK29	Q13423	NNT	-7.08	5.71e-07	0.504
FDNLYGCR	P23526	P23526	AHCY	-7.21	5.73e-07	0.505
REELITNWEQIR	A0A0D9SF54;A0A0D9SGF6;Q13813	Q13813	SPTAN1	-6.43	5.73e-07	0.505
VWQLYIGDTR	Q14749	Q14749	GNMT	-6.76	5.74e-07	0.505
IGCFALSEPGNGSDAGAASTTAR	P16219	P16219	ACADS	-6.21	5.77e-07	0.505
QHLQIQSSQPSLNEAIQNLAAIK	Q6IB77	Q6IB77	GLYAT	-7.06	5.77e-07	0.505
EIGAIAQVHAENGDLIAEGAK	Q14117	Q14117	DPYS	-6.67	5.82e-07	0.506
AQSHDCVPVLSEHPLYILYTSGTTGLPK	A0A0B4J1R2;Q9H6R3	A0A0B4J1R2	ACSS3	-5.43	5.85e-07	0.506
HVDLLINK	P22307;E9PLD1;H0YCB0	P22307	SCP2	-5.9	5.9e-07	0.507
IPFVYSLR	P06133;A0A1W2PQJ2	P06133	UGT2B4	-7.13	5.91e-07	0.507
GHGFITPADGGPDIFLHISDVEGEYVPVEGDEVTYK	Q9Y2V2;H3BUY4;H3BPY5;H3BNU9;H3BSW7	Q9Y2V2	CARHSP1	-5.68	5.96e-07	0.508
TQVTVQYMQDNGAVIPVR	Q00266;B1ANE6	Q00266	MAT1A	-5.08	5.96e-07	0.508
GQHWLLDGFPR	P27144;A0A8I5KW96;F8VS11	P27144	AK4	-6.5	5.97e-07	0.508
ELNELVSAIEEHFFQPQK	Q96G03	Q96G03	PGM2	-6	5.99e-07	0.509
AHLMVQPLGFHAPDCGK	Q9H2M3	Q9H2M3	BHMT2	-7.72	6.01e-07	0.509
TDDIGGLWR	P49326;E9PJF3;E9PP51;E9PQ84	P49326	FMO5	-6.44	6.04e-07	0.509
IEQFHSRPDDIVIATYPK	D6RIA8;O43704;D6RD70	O43704	SULT1B1	-5.61	6.05e-07	0.51
GGYVEVVNMDAAVQQQMLK	P24298	P24298	GPT	-6.1	6.06e-07	0.51
VEPTDSSFMEAIEFAQK	Q8IWW8;E5RFL4	Q8IWW8	ADHFE1	-5.76	6.07e-07	0.51
EGGFLLLHTLLR	P49327;A0A0U1RQF0	P49327	FASN	-7.07	6.15e-07	0.511
GTHTGVWVGVSGSETSEALSR	P49327;A0A0U1RQF0;A0A0U1RRG3	P49327	FASN	-5.31	6.18e-07	0.512
GAAVSLDFHTMSSTDLLNALK	P06133	P06133	UGT2B4	-6.51	6.21e-07	0.512
MEEIVEGCTGALHILAR	A0A2R8YCH5;A0A2R8Y5A3;P35222;A0A2R8Y543;A0A2R8Y804;A0A2R8Y750;A0A2R8Y7Z0;A0A2R8Y6G0;B4DGU4;A0A2R8Y5C3;A0A2R8Y5Z1;P14923	P14923	CTNNB1;JUP	-4.89	6.23e-07	0.512
SYLENPAFMLLDLK	P11182;A0A7P0Z494;A0A7P0T9W1	P11182	DBT	-6.53	6.23e-07	0.512
MQAHELFR	P33121;E7EPM6;D6RER0;D6RG07	P33121	ACSL1	-4.99	6.24e-07	0.512
LVNQQLLADPLVPPQLTIK	P28331;B4DJ81	P28331	NDUFS1	-5.65	6.26e-07	0.513
LAEELDVPVYLYGEAAR	O95954;A0A0G2JQF2;B7WPK3	O95954	FTCD	-6.66	6.27e-07	0.513
HIQEHYGGTATFYLSQAADGAK	P51570;K7EII7	P51570	GALK1	-7.02	6.3e-07	0.513
VVGNTTSGSYSYSIQK	Q9UI17	Q9UI17	DMGDH	-5.34	6.36e-07	0.514
HVINFDLPSDIEEYVHR	O00571;A0A0D9SFB3;A0A0D9SF53;A0A2R8Y4A4;A0A2R8YFS5;A0A0D9SG12;A0A2R8YF78;A0A2R8Y645;A0A2U3TZJ9;A0A2R8YFR4;A0A2R8YCW1;A0A2R8Y5G6;F6S8Q4;A0A2R8Y7T2;A0A2R8YDT5;A0A0J9YVQ7;A0A087WVZ1;O15523	O00571	DDX3X;DDX3Y	-5.38	6.37e-07	0.514
GVLSNAWHR	P51687	P51687	SUOX	-5.42	6.4e-07	0.515
MDFDQTDNGFLQLNHVR	Q99424	Q99424	ACOX2	-6.29	6.43e-07	0.515
HWILPQDYDHAQAEAR	Q15293	Q15293	RCN1	-7.27	6.44e-07	0.515
CFSIDNPGYEPEVVAVHPGGDTVAIGGVDGNVR	O75083	O75083	WDR1	-5.43	6.47e-07	0.516
VLTQLVATYPQGFK	P78329;K7EK90	P78329	CYP4F2	-6.47	6.5e-07	0.516
FDSPESHVGVAWR	P35520	P35520	CBS	-7.39	6.51e-07	0.516
ILPEYLSNWTMEK	O95831;A0A6Q8PG15;A0A6Q8PFM5;A0A7I2PK44;A0A6Q8PFE1;A0A6Q8PHJ9;A0A6Q8PHC0;A0A6Q8PFQ8;A0A6Q8PFS4;A0A6Q8PFA7;A0A7I2RLJ8;A0A6Q8PFW2;E9PMA0;A0A6Q8PHJ4	O95831	AIFM1	-7.12	6.52e-07	0.516
CPNADLKPQEILVSVNIPYSR	Q06278	Q06278	AOX1	-6.78	6.52e-07	0.516
TTIEAIHGLMSQVIK	Q92905	Q92905	COPS5	-5.4	6.56e-07	0.517
HQDVFNQPTLNSFMGLGQAAWK	H0YLC7;A0A804HJX2;A0A804HJ13;B7Z4W2;P16930	P16930	FAH	-8.11	6.58e-07	0.517
NFQNIFPPSATLHLSNIPPSVSEEDLK	A6NLN1;P26599;A0A0U1RRM4;A0A7I2V621;A0A0D9SF20	P26599	PTBP1	-5.15	6.6e-07	0.517
EFVEEFIWPAIQSSALYEDR	P00966;Q5T6L6;Q5T6L5	P00966	ASS1	-7.01	6.61e-07	0.518
FSMVLPEVEAALAEIPGVR	Q96CN7	Q96CN7	ISOC1	-6.33	6.62e-07	0.518
WLLAAAGVEFEEK	P08263;P09210;Q16772	P08263	GSTA1;GSTA2;GSTA3	-8.58	6.65e-07	0.518
SIQLDGLVWGASK	E9PRY8;A0A087X1X7;E9PQC9;P29692;E9PQZ1;E9PK01;H0YE58	E9PRY8	EEF1D	-6.41	6.66e-07	0.518
SAYALGGLGSGICPNR	P31327;A0A669KBF2	P31327	CPS1	-4.81	6.7e-07	0.519
FLYTVPNGNNPTGNSLTSER	Q8N5Z0;D6REB9	Q8N5Z0	AADAT	-4.75	6.71e-07	0.519
WAELLPLLQQCQVVR	P13489;E9PIM9;E9PMJ3;E9PLZ3;E9PIK5;E9PMN0;E9PMA9;E9PR82;E9PMI1	P13489	RNH1	-5.35	6.72e-07	0.519
GPLLVQDVVFTDEMAHFDR	P04040	P04040	CAT	-5.69	6.75e-07	0.519
GVDVSQVAWQSK	C9JDL1;P50053	P50053	KHK	-7.21	6.76e-07	0.52
ELAEEEPHLVEQFQK	P40855;Q5QNY5;B7Z8B3;E9PS71	P40855	PEX19	-4.81	6.76e-07	0.52
TYADYESVNECMEGVCK	P84090;G3V279	P84090	ERH	-5.02	6.8e-07	0.52
SCDGWLNFK	Q08AH3;F5GWL3;E7EPS5;Q68CK6;H3BTX9;H3BNJ9	Q68CK6	ACSM2A;ACSM2B	-6.09	6.81e-07	0.52
SPLFGQYFVLENPGTIK	Q5VT66;H7BYZ9	Q5VT66	36951	-4.82	6.82e-07	0.52
DFIDCFLIK	P10632;B7Z1F5;G3V188;A0A0D9SG51;P33261;P33260;A0A087X0B3	P10632	CYP2C8;CYP2C19;CYP2C18	-7.71	6.87e-07	0.521
NHFTVALNEK	P49888;H0Y8G0	P49888	SULT1E1	-5.69	6.87e-07	0.521
VDVNAPDVQAPDWHLK	Q09666	Q09666	AHNAK	-6.38	6.88e-07	0.521
HTGVIPTHHQFITNER	Q9BX66;A0A0U1RQI5	Q9BX66	SORBS1	-5.57	6.88e-07	0.521
EELFVTSK	P14550;Q5T621;V9GYP9;V9GYG2	P14550	AKR1A1	-7.47	6.89e-07	0.521
AEYLGSCLLHK	Q9ULC5;A0A8C8L3F5;A0A8C8KCK5	Q9ULC5	ACSL5	-6.17	6.91e-07	0.522
LSENNIQTIFAVTEEFQPVYK	H7C4K3;A0A7I2V2F9;E7EUI6;P05556;A0A7I2V348;C9JPK5;A0A7I2V5Z8;A0A7I2V5T3	H7C4K3	ITGB1	-5.01	6.95e-07	0.522
VAVAIPNRPPDAVLTDTTSLNQAALYR	A0A2R8Y7L2;P51659;E7EPL9;A0A804HK65;A0A2R8YD50;E7ET17;A0A804HKU2;A0A804HIR1	P51659	HSD17B4	-5.33	6.99e-07	0.522
HFLLEEDKPEEPTAHAFVSTLTR	P49327;A0A0U1RQF0	P49327	FASN	-6.99	7e-07	0.523
EFEPLLNWMK	P14625;A0A7P0TAT8;H0YIV0;A0A7P0TAE1;A0A7P0T823;A0A087WT78;A0A7P0T917;A0A7P0TAY2	P14625	HSP90B1	-7.05	7e-07	0.523
SPYLYPLYGLGELPQGFAR	P50395;Q5SX87;Q5SX91;P31150	P50395	GDI2;GDI1	-6.45	7.12e-07	0.524
IANDNSLNHEYLPILGLAEFR	P17174	P17174	GOT1	-7.3	7.19e-07	0.525
VHAPGLNLSGVGGK	Q09666	Q09666	AHNAK	-5.34	7.22e-07	0.525
DMAIATGGAVFGEEGLTLNLEDVQPHDLGK	P10809;A0A7I2V599;A0A7I2V2X6;A0A7I2YQK6	P10809	HSPD1	-6.05	7.23e-07	0.525
EQEHMINWVEK	P24539;Q5QNZ2	P24539	ATP5F1	-6.36	7.24e-07	0.526
IHFVPGWDCHGLPIEIK	Q9NSE4	Q9NSE4	IARS2	-5.93	7.26e-07	0.526
IYEGAYHVLHK	A0A0C4DFN3;Q99685;H7C4E0	A0A0C4DFN3	MGLL	-4.69	7.26e-07	0.526
SVDEVFDEVVQIFDK	P30085	P30085	CMPK1	-5.27	7.29e-07	0.526
VVSVLTVLHQDWLNGK	sp|A008145|abysis_8145;sp|A008221|abysis_8221;sp|A008481|abysis_8481;sp|A024250|abysis_24250;sp|A008918|abysis_8918;sp|A008482|abysis_8482;sp|A024229|abysis_24229;sp|A008521|abysis_8521;sp|A008700|abysis_8700;sp|A024328|abysis_24328;sp|A008148|abysis_8148;sp|A008054|abysis_8054;sp|A024251|abysis_24251;sp|A024307|abysis_24307;sp|A072122|abysis_72122;sp|A024337|abysis_24337;sp|A057736|abysis_57736;…	sp|A008469|abysis_8469	IGHG1;IGHG3	-8.6	7.29e-07	0.526
NAGNCLSPAVIVGLLK	A0A286YF22;O43175;A0A2C9F2M7	A0A286YF22	PHGDH	-6.83	7.39e-07	0.527
LQLNGNLQLELAQVLAQERPK	P49327;A0A0U1RQF0	P49327	FASN	-6.35	7.4e-07	0.527
TIVLHDTSLPDVSATDFEK	C9JDL1;P50053	P50053	KHK	-5.6	7.41e-07	0.528
VLSMAPGLTSVEIIPFR	O95340	O95340	PAPSS2	-5.22	7.41e-07	0.528
IYGADDIELLPEAQHK	P11586;V9GYY3;F5H2F4;V9GZ78	P11586	MTHFD1	-4.76	7.45e-07	0.528
VTWAPPPSIDLTNFLVR	H0Y7Z1;P02751	P02751	FN1	-5.41	7.61e-07	0.53
SWFEPLVEDMQR	P02649;CON__Q03247	P02649	APOE	-5.64	7.63e-07	0.53
CEMASTGEVACFGEGIHTAFLK	P31327	P31327	CPS1	-8.42	7.63e-07	0.53
MISDLIAGGIQPLQNLSVLK	A0A0C4DFM0;G3V5T0;G3V267;H0YJN8;G3V4T6;O43708	G3V4T6	GSTZ1	-6.24	7.63e-07	0.53
GMEPWTLK	Q16134;B4DEQ0;A0A804HL84;A0A804HL81;A0A804HJK8;A0A804HK05;A0A804HJT7;A0A804HKB8;A0A804HI80	Q16134	ETFDH	-5.08	7.66e-07	0.53
NESLESPMGEWGFQK	O95210	O95210	STBD1	-5.39	7.66e-07	0.53
LGADVTAVEFLGHVGGVGIDMEISK	P09622;E9PEX6	P09622	DLD	-5.84	7.71e-07	0.531
IEFVLNLPK	Q08AH3;F5GWL3;Q68CK6;H3BTX9;H3BP39	Q68CK6	ACSM2A;ACSM2B	-7.07	7.75e-07	0.531
AVIVPGNGGGDVTTHGWYGWVK	O75884	O75884	RBBP9	-5.94	7.78e-07	0.532
IGEIVAEMDVPLHCR	Q5SRE7;X6RJK6;G5E9M0;X6RFQ9;X6RCI6;H7C3M4	Q5SRE7	PHYHD1	-5.1	7.8e-07	0.532
SSQSEALLNITNNGIHFAPLQTFTDEEMMIK	P45954	P45954	ACADSB	-7.03	7.83e-07	0.532
ELAILLGMLDPAEK	P30041	P30041	PRDX6	-6.84	7.83e-07	0.532
IQEEAQCLIEELRK	P20813;M0QZJ2;A0A2R8YFA4	P20813	CYP2B6	-5.5	7.91e-07	0.533
GLYAAFDCTATMK	P11498	P11498	PC	-5.3	7.94e-07	0.533
SPWVESEIGYTALSETESPR	Q06520	Q06520	SULT2A1	-7.76	7.99e-07	0.534
FAHTNVESLVNEYDDNGEGIILFR	P30101;A0A8I5KT88;A0A8I5KW33;A0A8I5KS72;A0A8I5KNU9;A0A8I5KW00;A0A8I5QKQ5;A0A8I5KXC9;A0A8I5KPY2;A0A8I5KRV3;A0A8I5KYJ6;A0A8I5KXE2	P30101	PDIA3	-7.28	8.05e-07	0.535
VFTTQELVQAFTHAPATLEADR	O95433;G3V438;H0YJG7;H0YJ63	O95433	AHSA1	-5.32	8.06e-07	0.535
DFDFVPPVVR	P01024	P01024	C3	-6.34	8.07e-07	0.535
TVQLNVCSSEEVEK	Q02338;E9PCG9;C9K0G7;C9JM78;C9JQ90;A0A0G2JRX6	Q02338	BDH1	-6.46	8.21e-07	0.536
ASLHALVGSPIIWGGEPR	Q86TX2;G3V4F2;A0A087WT95;P49753	A0A087WT95	ACOT1;ACOT2	-7.09	8.23e-07	0.537
DTIFDVPVER	O75936	O75936	BBOX1	-5.63	8.27e-07	0.537
SLYTHSYEVPDHDNWPK	Q9BY49	Q9BY49	PECR	-7.48	8.28e-07	0.537
GGPEPTPLVQTFLR	A0A8I5QKY1;P38435;A0A8I5KXJ8;A0A8I5KXY4;A0A8I5QJS0	A0A8I5QKY1	GGCX	-5.14	8.31e-07	0.537
TLFIQCDVADQQQLR	P15428;E9PBZ2;E9PD69	P15428	HPGD	-5.47	8.31e-07	0.537
YILGNPLTPGVTQGPQIDK	P00352	P00352	ALDH1A1	-8.3	8.34e-07	0.538
QRVDVEDLGVDFLTIVGHK	A0A0A0MQU4;H7C3V9;H7C277;Q96I15	Q96I15	SCLY	-5.78	8.35e-07	0.538
QAPQTIHLPSGEILDVFDAAER	P21399	P21399	ACO1	-6.32	8.38e-07	0.538
LPLSTTSNEACK	Q5R3I4;A9UJP8;F8WBU8	Q5R3I4	TTC38	-6.06	8.41e-07	0.538
HLQDFHLNGFDHNFCLK	Q96C23;B8ZZ75;H7C1B5	Q96C23	GALM	-7.87	8.43e-07	0.539
YYAFPQMITPLVTK	Q14353;A0A1W2PR36	Q14353	GAMT	-5.59	8.43e-07	0.539
MVSDINNAWGCLEQVEK	A0A804HII9;A0A804HK61;A0A7I2V4Y4;A0A804HLF4;A0A804HIN7;A0A804HL31;P12814	A0A804HII9	ACTN1	-5.56	8.45e-07	0.539
EHSSLAFWK	P02749;J3KS17;CON__P17690	P02749	APOH	-6.03	8.5e-07	0.539
DLPLLLFR	A0A286YF22;O43175;A0A2C9F2M7;A0A286YFA2	A0A286YF22	PHGDH	-4.63	8.53e-07	0.54
NLDQEQLSQVLDAMFER	P13861;H7C1L0	P13861	PRKAR2A	-5.34	8.53e-07	0.539
IGDYVQQHGGVSLVEQLLQDPK	E7ETE2;P12081;A0A6Q8PHA5;A0A6Q8PF47;B4DDD8;A0A6Q8PFF2;A0A6Q8PHE3;A0A6Q8PF07;B4E1C5	E7ETE2	HARS	-4.64	8.6e-07	0.54
YSEGYPGQR	P34896;J3KRZ5;J3KRK5	P34896	SHMT1	-7.13	8.65e-07	0.541
AGAAPYVQAFDSLLAGPVAEYLK	Q01518;Q5T0R1;Q5T0R4;Q5T0R3;Q5T0R7;Q5T0R6;Q5T0R5;Q5T0R2	Q01518	CAP1	-5.99	8.67e-07	0.541
LGADMEDVCGR	P02649;H0Y7L5;E9PEV4;E7ERP7	P02649	APOE	-5.86	8.69e-07	0.541
LQHIQAPLSWELVRPHIYGYAVK	Q9H8H3;H0YI09	Q9H8H3	METTL7A	-7.39	8.7e-07	0.541
VDIDVPDVDVQGPDWHLK	Q09666	Q09666	AHNAK	-6.58	8.72e-07	0.541
MPCAEDYLSVVLNQLCVLHEK	CON__P02768-1;P02768;A0A0C4DGB6;B7WNR0;H0YA55;D6RHD5;C9JKR2;A0A087WWT3	CON__P02768-1	ALB	-8.42	8.76e-07	0.542
QETVGTLDLGGASTQITFLPQFEK	O75356;G3V4I0	O75356	ENTPD5	-4.92	8.76e-07	0.542
AFTGFIVEADTPGIQIGR	A0A7P0TB55;Q5T4U5;P11310;F6YB23;A0A7P0T932;A0A7P0TB51;A0A7P0T8G6	Q5T4U5	ACADM	-6.09	8.78e-07	0.542
QGDLIIINSSR	Q96NU7	Q96NU7	AMDHD1	-6.08	8.8e-07	0.542
LGELPSWILMR	G3V325;C9JJT5;P56134;C9JU26	G3V325	ATP5J2-PTCD1;ATP5J2	-5.96	8.81e-07	0.542
QYASLTGTQALPPLFSLGYHQSR	E9PKU7;Q14697;F5H6X6	Q14697	GANAB	-6.13	8.83e-07	0.542
YWQQVIDMNDYQR	O60701	O60701	UGDH	-6.36	8.84e-07	0.542
NILGAQVSEAVPLPEHGVSVVFVNLGNTK	Q96PE7	Q96PE7	MCEE	-5.4	8.85e-07	0.543
NAAIANHCFTCAINR	Q9UBR1	Q9UBR1	UPB1	-5.73	8.93e-07	0.543
NCWQNYLDFHR	P14854;A0A494C160	P14854	COX6B1	-6.99	8.94e-07	0.543
MSYTLQHVPIPR	Q6IB77	Q6IB77	GLYAT	-7.67	8.94e-07	0.543
GQYQGLSQDPNSLSNLDQDLPNNMIHQVPIK	Q9NYU2	Q9NYU2	UGGT1	-4.98	8.94e-07	0.543
DALLNSLGK	P51857	P51857	AKR1D1	-7.47	8.95e-07	0.543
CMALSTAVLVGEAK	Q02252;G3V4Z4	Q02252	ALDH6A1	-6.96	8.95e-07	0.543
VIHDNFGIVEGLMTTVHAITATQK	P04406;E7EUT5	P04406	GAPDH	-7.48	9.02e-07	0.544
TMQNTNDVETAR	A0A2R8YCH5;A0A2R8Y5A3;P35222;A0A2R8Y543;A0A2R8Y804;A0A2R8Y750;A0A2R8Y7Z0;B4DGU4;A0A2R8Y5C3;A0A2R8Y5Z1	A0A2R8YCH5	CTNNB1	-5.32	9.03e-07	0.544
DAGAPTYMYEFQYR	P23141	P23141	CES1	-7.04	9.06e-07	0.544
AVDDGYNVQPDTVAPIWNLR	P51687	P51687	SUOX	-5.73	9.06e-07	0.544
HDPLNPLCPGAIR	P07902;G3V4G9;G3V3U5;G3V223;F2Z2X9;A0A8I5KVJ6;H0YJL3	P07902	GALT	-6.19	9.15e-07	0.545
IAWTHITIPESLR	Q9H0E2;F2Z2Y8;E7EN89;E9PP67;E9PQ25	Q9H0E2	TOLLIP	-5.68	9.15e-07	0.545
EQLHVSAVETFANGNFPK	Q5R3I4;A9UJP8;H7C2L7	Q5R3I4	TTC38	-5.83	9.17e-07	0.545
VAIIGAGVSGLASIR	P31513;V9GZ60;V9GYP3	P31513	FMO3	-6.29	9.19e-07	0.546
LCLQQGQLCEPLPSLAESR	Q6XQN6;G5E977	Q6XQN6	NAPRT	-5.67	9.2e-07	0.546
SSFDQMVSGTSFQR	Q9ULD0	Q9ULD0	OGDHL	-4.24	9.23e-07	0.546
VSYHHGNHADPEER	Q9P0Z9	Q9P0Z9	PIPOX	-7.4	9.24e-07	0.546
ETSMVHELNR	B4DR61;P61619	B4DR61	SEC61A1	-6.63	9.24e-07	0.546
DRDYSDHPSGGSYR	Q96E39;P38159;H3BT71;H0Y6E7;H3BUY5	P38159	RBMXL1;RBMX	-7.15	9.27e-07	0.546
FHEICSNLVK	H3BN98;H3BPJ2;Q15041	H3BN98	ARL6IP1	-6.97	9.29e-07	0.547
GVFCAGADLK	Q86YB7;F6RJU0;F5GWU3	Q86YB7	ECHDC2	-6.32	9.3e-07	0.547
TTFTVAQNER	A0A7I2V2T5;P0DMN0;P0DMM9;A0A0A6YYL2;P50225;H3BRY5;P50226;E9PKW4	P50225	SULT1A4;SULT1A3;SULT1A1;SULT1A2	-4.89	9.38e-07	0.547
EQNIVFNAETYSNLIK	A0A804HHY9;A0A804HJA1;A0A804HKK7;A0A804HKX6;A0A804HIG4;P42704;A0A804HI14;A0A804HKJ0;A0A804HL40;A0A804HK30;A0A804HIN4;A0A804HKI2;A0A804HKR3;A0A804HJZ1;A0A804HLG8;A0A804HIQ7;A0A804HI40;A0A804HJI0	A0A804HIG4	LRPPRC	-4.94	9.39e-07	0.547
QGEYGLASICNGGGGASAMLIQK	A0A5F9ZHJ0;A0A5F9ZHD4;P24752;A0A5F9ZHL1;A0A5F9ZI66	P24752	ACAT1	-6.55	9.43e-07	0.548
LVALSEPALALLGLGAPPAR	Q9BVL4	Q9BVL4	SELO	-5.09	9.43e-07	0.548
VDFVSGLHTLCGAGDIK	Q93099;C9JTX9	Q93099	HGD	-6.96	9.46e-07	0.548
ALANVNIGSLICNVGAGGPAPAAGAAPAGGPAPSTAAAPAEEK	P05386	P05386	RPLP1	-5.34	9.48e-07	0.548
RQDLEDSLQAQQYFADANEAESWMR	A0A0D9SF54;A0A0D9SGF6;Q13813	Q13813	SPTAN1	-4.92	9.48e-07	0.548
NEIPNSHILDQYR	P35520	P35520	CBS	-5.94	9.49e-07	0.548
HFDETVNR	P04843;B7Z4L4	P04843	RPN1	-7.01	9.49e-07	0.548
NANSLGGGFHCWTCDVR	A0A6Q8PHC6;P50440	A0A6Q8PHC6	GATM	-7.69	9.52e-07	0.548
IADQCPSSLAIQENANALAR	P05062;A0A3B3IS80	P05062	ALDOB	-7.8	9.63e-07	0.549
SYSPYDYQPCLAGPNQDFHSK	A0A804HI61;A0A2R8Y4T1;E9PGF5;A0A494C067;E9PF55;Q9HBL0	A0A804HI61	TNS1	-4.58	9.67e-07	0.55
GHNGWVTQIATTPQFPDMILSASR	D6RBD0;D6R909;D6RGK8;D6RDI0;P63244;J3KPE3;D6RAC2;D6REE5;D6RHH4;D6RFZ9;E9PD14;D6RAU2;D6RHJ5	P63244	GNB2L1	-6.36	9.68e-07	0.55
LFQLMVEHTPDEESIDWTK	Q12907;D6RBV2;D6RDX1	Q12907	LMAN2	-5.96	9.69e-07	0.55
YMMIVDPAISSSGPAGSYRPYDEGLR	P10253	P10253	GAA	-5.66	9.7e-07	0.55
IIPPGSGIIHQVNLEYLAR	P21399	P21399	ACO1	-5.46	9.76e-07	0.55
IIAFVGSPVEDNEK	P55036;A6PVX3;Q5VWC4	P55036	PSMD4	-6.58	9.8e-07	0.551
WAGGGFLSTVGDLLK	P83111	P83111	LACTB	-5.31	9.89e-07	0.551
LTSEDLSDDVFK	Q9UI17;Q8TCC6	Q9UI17	DMGDH	-5.89	9.92e-07	0.552
ACGNFGIPCELR	P22234;E9PBS1;D6RF62	P22234	PAICS	-4.6	9.95e-07	0.552
ATEGMVVADK	Q99436;Q5TBG5	Q99436	PSMB7	-5.27	9.97e-07	0.552
TGTVVALEVDHFSNVGNTQDLSQSIMER	P47989	P47989	XDH	-4.9	9.97e-07	0.552
LGLVFDDVVGIVEIINSK	Q01518	Q01518	CAP1	-6.1	1e-06	0.552
DFYLATSPPDSFLDDHHLTRPHPER	Q13131	Q13131	PRKAA1	-5.36	1e-06	0.553
DYIWNTLNSGR	O75390;B4DJV2;A0A0C4DGI3;H0YIC4	O75390	CS	-5.31	1.01e-06	0.553
HSLDASQGTATGPR	O00330;A0A8C8MSB2;E9PLU0;E9PRI6	O00330	PDHX	-5.79	1.01e-06	0.553
SVNDIVVLGPEQFYATR	Q15166;F8WD41;C9JZ99	Q15166	PON3	-5.19	1.01e-06	0.553
IQDALSTVLQYAEDVLSGK	H0YDT6;O00303	H0YDT6	EIF3F	-5.03	1.02e-06	0.554
LLIPVAEGMNEIWLR	H0YJ34;A0A0U1RRM8;Q96AC1	Q96AC1	FERMT2	-4.87	1.02e-06	0.554
WSGYMEGAVEAGER	P21397;A0A8I5KUC3;A0A8I5KP93	P21397	MAOA	-4.69	1.02e-06	0.554
VIVDANNLTVEIENELNIIHK	Q8WWY3;E7EVX8;E7EU94;E7ESX0;E7EN72	Q8WWY3	PRPF31	-5.02	1.02e-06	0.554
HLQTYGEHYPLDHFDK	F5H5P2;P12694	F5H5P2	BCKDHA	-5.79	1.03e-06	0.555
DVEINGMFIPK	A0A499FJM4;P08684;A0A494C0W7;E7EVM8;P24462;A0A087WV96	A0A499FJM4	CYP3A4;CYP3A7	-7.68	1.03e-06	0.555
NQGGGLSSSGAGEGQGPK	P07814	P07814	EPRS	-5.22	1.03e-06	0.555
LTFPGGLLIGCSPGFMNVPK	Q16134;B4DEQ0;A0A804HL84;A0A804HL81;A0A804HJK8;A0A804HK05;A0A804HJT7;A0A804HI80	Q16134	ETFDH	-5.68	1.03e-06	0.554
HAGGVTGGWDNLLAVIPGGSSTPLIPK	G3V0I5;P49821;B4DE93;H0YD04	G3V0I5	NDUFV1	-5.5	1.03e-06	0.555
HYAHTDCPGHADYVK	P49411	P49411	TUFM	-7.32	1.03e-06	0.554
QHPGCLAQEACVR	Q08426	Q08426	EHHADH	-7.01	1.04e-06	0.556
NTMSLLAANNLLAGLR	Q9UBQ7	Q9UBQ7	GRHPR	-6.67	1.04e-06	0.556
ALVSAQWVAEALR	P25325;B1AH49	P25325	MPST	-7.69	1.04e-06	0.556
VGNPWDPNVLYGPLHTK	A0A1B0GW77;P49419;A0A1B0GTG2;A0A1B0GUA1;A0A1B0GW82;A0A1B0GTJ4;A0A1B0GV49	A0A1B0GW77	ALDH7A1	-8.06	1.05e-06	0.556
LTIHAENPDSQAVPSAAGAASGEK	B7ZB24;A0A075B6R8;H0YGQ3;O75970;F5H1U9	O75970	MPDZ	-4.95	1.05e-06	0.557
EGTGSTATSSSSTAGAAGK	B3KS98;O15372;E5RGU4;E5RFW7;E5RFH0;E5RHC7;E5RH59	B3KS98	EIF3H	-4.94	1.06e-06	0.558
ECSIYLIGGSIPEEDAGK	Q9NQR4;H7C579	Q9NQR4	NIT2	-6.09	1.06e-06	0.557
NMMAACDPR	A0A0B4J269;Q13509;P04350;Q5JP53;P07437;Q5ST81;A6NNZ2;P68371;Q13885;Q3ZCM7;A0A075B736;Q5SQY0;Q9BUF5;K7ESM5;Q9BVA1	P68371	TUBB3;TUBB4A;TUBB;TUBB4B;TUBB2A;TUBB8;TUBB6;TUBB2B	-7.72	1.06e-06	0.557
KPFPINHGETSDETLLEDAIEVCK	P15374;A0A087WTB8;Q5TBK7	P15374	UCHL3	-5.87	1.06e-06	0.558
FGANAILGVSLAVCK	P06733;A0A2R8Y6G6;K7EM90;A0A2R8Y879;A0A2R8YEM5;E5RG95;E5RI09;P09104;P13929;E5RGZ4;K7EPM1;K7EKN2	P06733	ENO1;ENO3;ENO2	-5.45	1.07e-06	0.558
MWSIENIAFGSGGGLLQK	P43490;A0A7P0T9I9;A0A7P0T895;A0A7P0T931;A0A7P0T8L3;A0A7P0TAS5;A0A7P0T862;A0A7P0Z437	P43490	NAMPT	-5.07	1.07e-06	0.559
GGELCLSMASFLK	Q86TX2;A0A087WT95;P49753	A0A087WT95	ACOT1;ACOT2	-6.05	1.08e-06	0.559
AGQVVTIWAAGAGATHSPPTDLVWK	A0A6Q8PFJ0;P02545;A0A804HL68	A0A6Q8PFJ0	LMNA	-6.39	1.09e-06	0.561
DLLIYDSMPR	Q13884;A0A3B3ITC2	Q13884	SNTB1	-4.63	1.09e-06	0.56
EIGADLVLQISK	Q00796;A0A6I8PIS1	Q00796	SORD	-7.9	1.09e-06	0.56
DTDHGPQNHHAHLVK	O75891	O75891	ALDH1L1	-5.77	1.1e-06	0.561
YDYYYNTDSK	Q13576;F5H7S7;D6R939;E9PDT6	Q13576	IQGAP2	-5.61	1.1e-06	0.562
SEFPWEVPR	Q00266	Q00266	MAT1A	-7.28	1.1e-06	0.561
GQVAESGSPAQLLAQK	A0A0G2JMG3;A0A1W2PPQ8;O95255	A0A0G2JMG3	ABCC6	-4.65	1.11e-06	0.563
VQEEIDHVIGR	P10632;B7Z1F5;G3V188;A0A0D9SG51	P10632	CYP2C8	-5.84	1.11e-06	0.562
GAVLVCAWAEEGADALGPDGK	P50053	P50053	KHK	-5.45	1.11e-06	0.562
AHEDYAYR	Q9UL12;Q5SYV1	Q9UL12	SARDH	-6.1	1.11e-06	0.562
SLSEGHPTAQHEK	P49748;G3V1M7;J3QRJ8	P49748	ACADVL	-7.11	1.12e-06	0.563
IQHSITAQDHQPTPDSCIISMVVGQLK	P61970;H3BRV9	P61970	NUTF2	-6.39	1.12e-06	0.563
VCENIPIVLCGNK	P62826;B5MDF5;J3KQE5;F5H018;B4DV51	P62826	RAN	-5.58	1.12e-06	0.563
VYCDMNTENGGWTVIQNR	P02675;D6REL8	P02675	FGB	-5.68	1.13e-06	0.564
TLVTQNSGVEALIHAILR	P14923	P14923	JUP	-5.43	1.13e-06	0.564
YNNCWLAR	Q16822;H0YM31	Q16822	PCK2	-6.87	1.13e-06	0.565
QAHTMDPQLR	P49327;A0A0U1RQF0;A0A0U1RRG3	P49327	FASN	-5.8	1.14e-06	0.565
MGVTYGAQAHLK	Q9UL12;Q5SYV2	Q9UL12	SARDH	-6.01	1.14e-06	0.565
IWEQIQPDLHTNDECVATYK	A0A8C8KIA0;Q12904;A0A8C8MUD1	Q12904	AIMP1	-5.17	1.16e-06	0.566
ACAEFSFHVPSLEELAGVMQK	Q9H0W9;A0A087WT99;E9PPB5;E9PIP1;E9PLC5;E9PLB3;E9PR95;E9PSC3	Q9H0W9	C11orf54	-5.76	1.16e-06	0.567
LGIPGPTPLPFLGNILSYHK	A0A499FJM4;P08684;C9JBD2	A0A499FJM4	CYP3A4	-6.41	1.16e-06	0.567
MTLVASEDYGDTLAAIQGLLK	A0A0D9SF54;A0A0D9SGF6;Q13813	Q13813	SPTAN1	-5.87	1.16e-06	0.567
YESLELCRPVLQQGR	A0A087WVQ6;Q00610	A0A087WVQ6	CLTC	-5.23	1.17e-06	0.568
QSLPPVTTHNMIDDSTDPILSTIR	P54840	P54840	GYS2	-6.03	1.17e-06	0.567
TIFMWYR	H3BRN4;P80404;H3BNQ7	H3BRN4	ABAT	-6.41	1.18e-06	0.569
GFLVFAGCLMK	Q02338;C9JM78;C9JQ90;A0A0G2JRX6;C9JEB9	Q02338	BDH1	-5.8	1.18e-06	0.569
LGFPVYSHVDYSNEAMQK	Q6IB77	Q6IB77	GLYAT	-7.48	1.18e-06	0.568
HLEMAEILGADTR	Q8IWW8	Q8IWW8	ADHFE1	-4.47	1.19e-06	0.569
NHLTQFSPHFK	P35573	P35573	AGL	-4.64	1.19e-06	0.569
SINNDTTYCIK	Q53H82	Q53H82	LACTB2	-4.98	1.19e-06	0.569
LGCEVLGVSVDSQFTHLAWINTPR	P32119;A6NIW5	P32119	PRDX2	-5.42	1.19e-06	0.57
QATEEELFR	Q96NU7	Q96NU7	AMDHD1	-5.51	1.2e-06	0.57
APVIRPGGTLGLSEAADSDAHLFQDSTEPR	Q9C0C2	Q9C0C2	TNKS1BP1	-4.92	1.2e-06	0.57
TLAYLLPAIVHINHQPYLER	A0A1X7SBZ2;A0A5H1ZRQ2;Q92841	A0A1X7SBZ2	DDX17	-5.2	1.21e-06	0.571
GLILLIDHSQELQLQSGLK	E9PBP6;P55157	P55157	MTTP	-6.07	1.21e-06	0.571
NINDAWVCTNDMFR	P61970	P61970	NUTF2	-5.6	1.21e-06	0.571
VGFTNISHMLTPK	Q9UI17;Q8TCC6	Q9UI17	DMGDH	-6.06	1.23e-06	0.573
KGDEVQCEIEELGVIINK	Q96GK7;Q6P2I3	Q96GK7	FAHD2A;FAHD2B	-6.92	1.23e-06	0.573
YLALESMCTLASSEFSHEAVK	O95782;O94973;A0A0G2JS82;A0A8I5KPP9;A0A8I5KYZ9;A0A0G2JQM1	O95782	AP2A1;AP2A2	-5.15	1.24e-06	0.574
ITLECLPQNVGFYK	Q96EK6;G3V5E4	Q96EK6	GNPNAT1	-5.19	1.24e-06	0.574
MADCGGLPQISQPAK	Q92597;A0A7I2ST14;E7ESM1	Q92597	NDRG1	-4.33	1.25e-06	0.575
TGTCGYCGLQFR	O75380	O75380	NDUFS6	-5.94	1.25e-06	0.575
ESGVGQTDWSGVEAGEFLK	Q9C0C2	Q9C0C2	TNKS1BP1	-4.77	1.25e-06	0.575
AVASLNTPFIPANPNMSPLESIK	P34913;E5RFH6;E5RFU2	P34913	EPHX2	-5.47	1.26e-06	0.576
ILELNQEDFSVVVEPGVTR	Q86WU2	Q86WU2	LDHD	-4.62	1.26e-06	0.576
KFNLDALVTHTLPFDK	P08319	P08319	ADH4	-9.84	1.27e-06	0.576
YWPQEAGEYAVHVLCNSEDIR	P21333;A0A7P0NMY4;Q60FE5	P21333	FLNA	-4.82	1.27e-06	0.576
SFLEIWDR	O75452	O75452	RDH16	-6.4	1.27e-06	0.577
VWAHYEEQPVEEVMPVLEEK	Q7KZF4	Q7KZF4	SND1	-5.58	1.27e-06	0.577
YLDEDTVYHLQPSGR	Q00266	Q00266	MAT1A	-4.21	1.28e-06	0.578
VFSANSTAACTELAK	Q14558	Q14558	PRPSAP1	-4.82	1.28e-06	0.577
DYGDLPFADIPNDSPFQIVK	P05089;A0A5F9ZH78;A0A5F9ZGN6	P05089	ARG1	-7.77	1.29e-06	0.579
NFHTVPYMVGINK	P23141;H3BSU0;H3BQR4	P23141	CES1	-4.85	1.3e-06	0.58
HVLQTFGPIPEFSR	Q9Y2S2;A0A2R8Y4K2	Q9Y2S2	CRYL1	-5.64	1.3e-06	0.579
MVTEEEIQFYVQQFK	P34913;E5RFH6;E5RFU2	P34913	EPHX2	-6.47	1.3e-06	0.579
DGTLKPGDTIIEPTSGNTGIGLALAAAVR	P35520;C9JMA6	P35520	CBS	-6.18	1.31e-06	0.58
YFLVGAGAIGCELLK	P22314	P22314	UBA1	-4.94	1.31e-06	0.58
NLTQYSWLLDGFPR	Q9UIJ7	Q9UIJ7	AK3	-6.13	1.32e-06	0.581
LMVTGAAPVSATVLTFLR	P33121;E7EPM6;B7Z3Z9;H0Y9U7	P33121	ACSL1	-6.92	1.33e-06	0.582
FSLSCSETLMGELGNIAK	Q9Y2T3;Q5SZC5	Q9Y2T3	GDA	-5.71	1.33e-06	0.582
HHLQIPIHFPK	Q9Y2Q3;E9PFN5;C9JNT3	Q9Y2Q3	GSTK1	-5.67	1.33e-06	0.582
FVNLFPEVKPTIQDVLR	O94973;A0A0G2JS82;A0A8I5KPP9;A0A0G2JQM1	O94973	AP2A2	-5.39	1.34e-06	0.583
GCQLLVYPGAFNLTTGPAHWELLQR	Q9NQR4	Q9NQR4	NIT2	-6.25	1.34e-06	0.583
QELAVFCSPEPPAK	Q9Y490	Q9Y490	TLN1	-4.84	1.34e-06	0.583
ELGATECINPQDYKK	D6RHZ6;V9HW50;P00325;P07327;P00326	V9HW50	ADH1B;HEL-S-117;ADH1A;ADH1C	-5.87	1.35e-06	0.584
EVPQMCIPGK	P35573	P35573	AGL	-5.6	1.36e-06	0.584
HNQPSEFTIESLENTAVDLFGAGTETTSTTLR	P11712	P11712	CYP2C9	-7.26	1.36e-06	0.584
IQCTLQDVGSALATPCSSAR	Q96EY8;S4R3P5;F5H4Z7	Q96EY8	MMAB	-5.01	1.36e-06	0.584
SFQSLACSPGLPAADR	Q96JY6;C9JS55;C9JSR2;C9K0F0;C9J0X3;A0A087WXJ0	Q96JY6	PDLIM2	-4.84	1.36e-06	0.584
HGLPPSETIAIVEHINAK	O94903;E5RFX7;H0YBG2	O94903	PROSC	-5.37	1.36e-06	0.585
ILMAAPGMAIPPFIMNTLEK	Q9H9B4	Q9H9B4	SFXN1	-5.33	1.36e-06	0.584
AITIASAVNCPLYIVHVMSK	Q14117	Q14117	DPYS	-7.94	1.37e-06	0.585
ISGQEVNEAACDIAR	Q93088	Q93088	BHMT	-4.76	1.38e-06	0.586
GGTFTDVFAQCPGGHVR	O14841;A0A087WY99	O14841	OPLAH	-5.6	1.38e-06	0.586
HLNEIDLFHCIDPNDSK	Q15185;A0A087WYT3	Q15185	PTGES3	-6.41	1.38e-06	0.586
SKDDQVTVIGAGVTLHEALAAAELLK	P29401	P29401	TKT	-6.75	1.38e-06	0.586
SFSAPATQAYGHEIPLR	A0A804HI61;A0A2R8Y4T1;E9PGF5;A0A494C067;H0Y4U1;E9PF55;Q9HBL0	A0A804HI61	TNS1	-4.71	1.38e-06	0.586
AQELGATECLNPQDLK	P28332;Q8IUN7;D6RH17;H0Y8U2	P28332	ADH6	-4.8	1.39e-06	0.587
LFVGGLSFDTNEQSLEQVFSK	D6W5Y5;K7ENX8;K7ELV6;K7EJV5;K7ELT6;K7EJV1;K7EMY9;K7EPM4;K7ER40;K7EQR7;K7EQX4;K7ENN6;K7EIF7;K7EQL0;Q14011	Q14011	CIRBP	-4.05	1.39e-06	0.586
TLPSQGVDDFLQAK	P78329;A0A0A0MQR0;V9GYA1;Q08477	P78329	CYP4F2;CYP4F3	-7.07	1.39e-06	0.587
PALPGWK	H0YML5;Q16822;H0YM31	Q16822	PCK2	-6.96	1.39e-06	0.586
QMHPDIESER	Q99424;C9J0G0;C9JY29	Q99424	ACOX2	-5.93	1.4e-06	0.587
VCIVGSGNWGSAIAK	P21695	P21695	GPD1	-6.29	1.41e-06	0.588
HATGNWGYLDQVAALR	O00748;J3QLP1	O00748	CES2	-6.61	1.42e-06	0.589
EHDPVGQMVNNPK	P55060	P55060	CSE1L	-4.58	1.43e-06	0.59
LLSHCLLVTLAAHLPAEFTPAVHASLDK	P69905;G3V1N2	P69905	HBA1;HBA2	-8.83	1.43e-06	0.59
YSGLCPHVVVLVATVR	A0A494C1T2;P11586;V9GYY3;F5H2F4;V9GZ78	P11586	MTHFD1	-7.1	1.43e-06	0.59
TQYNQVPSEDFER	P78310	P78310	CXADR	-4.07	1.44e-06	0.59
LLGNVLVCVLAR	P02042	P02042	HBD	-6.38	1.44e-06	0.59
LQVEHPVTECITGLDLVQEMIR	P05165;A0A1B0GUX9	P05165	PCCA	-6.09	1.44e-06	0.59
DKEETLPLEDGWWGPGTR	P07099;B1AQP8	P07099	EPHX1	-6.38	1.45e-06	0.591
VNAVFEWHITK	A0A2R8Y7L2;P51659;E7EPL9;A0A804HK65;A0A2R8YD50;E7ET17;A0A804HIR1	P51659	HSD17B4	-6.15	1.45e-06	0.591
WANFHLENSGWQK	P13797	P13797	PLS3	-5.15	1.45e-06	0.591
AFVILASQFLSHDPEQLTK	Q68CK6;H3BTX9;H3BP39	Q68CK6	ACSM2B	-7.53	1.46e-06	0.592
IVDAVIQEHQPSVLLELGAYCGYSAVR	F8WBW9;P21964;A0A7I2V370;E7EMS6;E7EUU8;A0A7I2V3G7;H7BZ45	P21964	COMT	-6.78	1.46e-06	0.592
EMNLSETAFIR	P30039;A0A0C4DFS0	P30039	PBLD	-4.37	1.49e-06	0.594
LNDGHFMPVLGFGTYAPAEVPK	P52895;B4DK69;S4R3P0;Q04828	Q04828	AKR1C2;AKR1C1	-7.51	1.5e-06	0.595
VVVVDDLLATGGTMNAACELLGR	P07741;H3BQZ9	P07741	APRT	-5.21	1.5e-06	0.595
EVLNAVPVLLHIPALAGK	P10635;A0A0G2JNM9;A0A0G2JLV4;H7BY38;A0A1B0GUD8;Q38LG0;A0A0G2JSD7;C1ID54;A0A1B0GU72;A0A0G2JLK7;A0A1B0GV74	P10635	CYP2D6	-6.56	1.5e-06	0.595
EFHHGPDPTDTAPGEQAQDVASSPPESSFQK	A0A8I5KU76;Q9BS26	Q9BS26	ERP44	-5.45	1.5e-06	0.595
VVNSETPVVVDFHAQWCGPCK	Q99757;F8WDN2	Q99757	TXN2	-4.98	1.5e-06	0.595
LTTAMCNEVASLSK	Q8IWE2	Q8IWE2	FAM114A1	-4.99	1.51e-06	0.596
VSLFGGGYCISK	O75452	O75452	RDH16	-5.59	1.51e-06	0.596
VLELLLPIR	Q5R3I4;H7C089	Q5R3I4	TTC38	-5.59	1.51e-06	0.596
VDIDDHTDLAIEYEVSAVPTVLAMK	Q99757;M0QXH0	Q99757	TXN2	-4.96	1.51e-06	0.596
FAEEADVVIVGAGPAGLSAAVR	Q16134;B4DEQ0;A0A804HL84;A0A804HL81;A0A804HJK8;A0A804HK05;A0A804HJT7;A0A804HI48;A0A804HI73;A0A804HK66	Q16134	ETFDH	-5.2	1.52e-06	0.597
FYEGTADEMCK	H3BPQ4;H3BQW8;Q16775;H3BPK3	Q16775	HAGH	-6.18	1.52e-06	0.596
NYYEQWGK	P22626;A0A7I2V323;A0A7I2V4N1;A0A7I2V3P1;A0A7I2V3P7;A0A7I2V4I6;A0A7I2V4S4;A0A087WUI2;A0A7I2V4N0;A0A7I2YQN4	P22626	HNRNPA2B1	-6.6	1.52e-06	0.596
LEQISPFPFDLIK	Q9ULD0	Q9ULD0	OGDHL	-4.17	1.52e-06	0.596
NHQDPLAVAYHLIIDNR	Q13131	Q13131	PRKAA1	-5.08	1.52e-06	0.596
NHLPVPNLDPDTYR	P51687	P51687	SUOX	-5.55	1.52e-06	0.596
LALSPNAQVLALASGSSIHLYNTR	E9PF19;Q9Y4P3	E9PF19	TBL2	-4.83	1.52e-06	0.596
TVQMDHTFFPGYR	P47989	P47989	XDH	-5.19	1.52e-06	0.597
YNMGLPVDFDQYNELHLPAVILK	Q07960;H0YE29	Q07960	ARHGAP1	-5.34	1.53e-06	0.597
YNPVVIDFEMQPIHEVLR	P07357	P07357	C8A	-5.43	1.53e-06	0.597
HGLIPNLLGEGIYAR	P35573	P35573	AGL	-5.2	1.54e-06	0.597
VFIMDNCEELIPEYLNFIR	P07900	P07900	HSP90AA1	-5.79	1.54e-06	0.598
NCHLNENIEK	Q13907;Q9BXS1	Q13907	IDI1;IDI2	-5.07	1.54e-06	0.598
VAASDWTFLHCLPR	P00480	P00480	OTC	-7.11	1.54e-06	0.598
VEVECSSLQEAVQAAEAGADLVLLDNFKPEELHPTATVLK	Q15274;H3BP73	Q15274	QPRT	-6.99	1.55e-06	0.598
TVLCGTCGQPADK	A0A6Q8PFJ0;P02545	A0A6Q8PFJ0	LMNA	-5.29	1.56e-06	0.599
VSALTQMESACVSIHEALK	Q9Y3B3;A0A0A6YYA0	Q9Y3B3	TMED7;TMED7-TICAM2	-5.69	1.56e-06	0.599
GLFEVNPWK	Q9HDC9;H0Y512	Q9HDC9	APMAP	-5.57	1.57e-06	0.6
SHYAAEEISEK	O15020;A0A087WYQ1	O15020	SPTBN2	-4.38	1.57e-06	0.599
RFDEILEVSDGIMVAR	P30613	P30613	PKLR	-5.92	1.58e-06	0.601
EGGQYGLVAACAAGGQGHAMIVEAYPK	P55084;F5GZQ3;B5MD38	P55084	HADHB	-6.12	1.59e-06	0.601
NLTLTDLQSPK	Q9NYQ3;Q5QP02	Q9NYQ3	HAO2	-5.21	1.59e-06	0.601
EGMTAFVEK	P30084	P30084	ECHS1	-5.15	1.6e-06	0.602
LILADALCYAHTFNPK	P28838	P28838	LAP3	-6.16	1.6e-06	0.602
LENYPIPEPGPNEVLLR	Q00796;A0A6I8PIS1;H0YKB3	Q00796	SORD	-5.54	1.6e-06	0.602
HLNQGTDEDIYLLGK	P15907	P15907	ST6GAL1	-4.98	1.6e-06	0.602
WNTYIPLHYNK	O95210	O95210	STBD1	-5.63	1.6e-06	0.602
SHTEEDCTEELFDFLHAR	P07919	P07919	UQCRH	-5.54	1.6e-06	0.602
CLHSVGQPLTGQGEPVSQWPCNPEK	H0YML5;H0YNG4;H0YMU6;H0YMA5;Q16822;H0YM31	Q16822	PCK2	-7.08	1.62e-06	0.603
DPLHEELLGQGCVFQER	Q9UL12;Q5SYV1	Q9UL12	SARDH	-5.76	1.63e-06	0.603
ELEAVCQDVLSLLDNYLIK	P61981	P61981	YWHAG	-5.87	1.63e-06	0.604
WVPQMGDHTEVLK	P35914	P35914	HMGCL	-6.69	1.66e-06	0.605
AAELVTQNCEAYEAHMR	A0A0A0MQU4;H7C3V9;H7C1N7;Q96I15	Q96I15	SCLY	-4.77	1.67e-06	0.606
SVTELNGDIITNTMTLGDIVFK	P07148	P07148	FABP1	-6.4	1.69e-06	0.607
SPDEVTLTSIVPTR	Q9UKS6;A0A0C4DGG1;H0YDM6	Q9UKS6	PACSIN3	-4.66	1.69e-06	0.608
DITGALFK	P05177	P05177	CYP1A2	-7.45	1.7e-06	0.608
TVAGIIVEPIQSEGGDNHASDDFFR	H3BRN4;P80404;H3BNQ7	H3BRN4	ABAT	-4.67	1.71e-06	0.609
NHFTVAQAEDFDK	Q06520	Q06520	SULT2A1	-6.39	1.71e-06	0.609
VDAISAECPSLQTK	Q6NUN0	Q6NUN0	ACSM5	-5.49	1.73e-06	0.61
HVEDVPAFQALGSLNDLQFFR	P25311;C9JEV0;H7BZJ8	P25311	AZGP1	-5.09	1.73e-06	0.61
CVVILPDSVR	P35520;H7C2H4	P35520	CBS	-6.22	1.73e-06	0.61
LCSGVLGTVVHGK	E9PIE4;Q9Y6C9	Q9Y6C9	MTCH2	-6.48	1.73e-06	0.61
HQGALYSLFPDHHVK	Q15493	Q15493	RGN	-6.6	1.73e-06	0.61
GLTVPIASIDIPSGWDVEK	Q8NCW5	Q8NCW5	APOA1BP	-5.18	1.74e-06	0.611
EMDQTMAANAQK	P30085;Q5T0D2	P30085	CMPK1	-7.2	1.74e-06	0.611
IEQHYFEDR	O75431;C9JNK6	O75431	MTX2	-3.92	1.74e-06	0.611
TWEQQQEVVSR	B4DDD6;Q9UJU6;H0Y5J4	Q9UJU6	DBNL	-5.24	1.75e-06	0.611
VTIFAEGCHGHLAK	Q16134;B4DEQ0;A0A804HL84;A0A804HL81;A0A804HJK8;A0A804HK05;A0A804HJT7;A0A804HI48;A0A804HI73;A0A804HI80;A0A804HI70	Q16134	ETFDH	-6.11	1.76e-06	0.612
FCPAGVYEFVPVEQGDGFR	Q16134;B4DEQ0;A0A804HL84;A0A804HL81;A0A804HK05;A0A804HJT7;A0A804HKB8;A0A804HI80	Q16134	ETFDH	-6.44	1.77e-06	0.612
LLYECNPMAYVMEK	P09467;A0A3B3IUC7	P09467	FBP1	-7.69	1.77e-06	0.612
WGEEHIPGSPFHVTVP	A0A804HK76;O75369;E7EN95	O75369	FLNB	-6.03	1.77e-06	0.612
VTASDPLDTLGSEGALSPGGVASLLR	P0C0L4;P0C0L5;F5GXS0;A0A3B3ISA6;A0A0G2JPR0;A0A140TA49	P0C0L5	C4A;C4B	-6.26	1.78e-06	0.613
HVSLPSFNQLFGLSDPVNR	P49593;A8MX49;B5MCT7;C9J2F3	P49593	PPM1F	-4.37	1.78e-06	0.613
EAMSAYNSHEEGR	P35573	P35573	AGL	-7.33	1.79e-06	0.613
VVDFIDEGVNIGLEVK	P34897;H0YIZ0	P34897	SHMT2	-5.48	1.79e-06	0.614
HVPGASFFDIEECR	Q16762;B1AH48	Q16762	TST	-7.11	1.79e-06	0.613
AANVLGGACGLQPGDR	Q6NUN0	Q6NUN0	ACSM5	-4.6	1.8e-06	0.614
EVPMVVVPPVGAK	Q9P2E9;A2A2S5	Q9P2E9	RRBP1	-5.93	1.8e-06	0.614
LRPGSIETYEQEK	Q9BVJ7	Q9BVJ7	DUSP23	-4.32	1.82e-06	0.615
GHMLENHVER	CON__Q0VCM5;P19827;H7C0N0	P19827	ITIH1	-4.63	1.82e-06	0.615
IGPSEVENALMEHPAVVETAVISSPDPVR	Q08AH3;F5GWL3	Q08AH3	ACSM2A	-7.38	1.83e-06	0.616
PIHHFLGTSTFSQYTVVDENAVAK	D6RHZ6;V9HW50;P00325	V9HW50	ADH1B;HEL-S-117	-7.57	1.84e-06	0.616
KPADLQNLAPGTHPPFITFNSEVK	Q9Y696	Q9Y696	CLIC4	-5.66	1.84e-06	0.616
GNWGHLDQVAALR	P23141	P23141	CES1	-9.09	1.85e-06	0.617
LPPNVVAVPDVVQAAEDADILIFVVPHQFIGK	P21695	P21695	GPD1	-7.9	1.85e-06	0.617
LQGDVAGALEDLER	A6NLP5	A6NLP5	TTC36	-6.13	1.85e-06	0.617
VVATGLCGTEMK	P28332;Q8IUN7;D6RH17	P28332	ADH6	-6.24	1.86e-06	0.618
VYQHQVVANCR	P34896	P34896	SHMT1	-7.45	1.87e-06	0.618
GIDIHGVPYVINVTLPDEK	A0A7I2V430;A0A7I2V4F0;Q92499;A0A7I2V2M5;A0A087WZ71;A0A087X2G1	A0A7I2V430	DDX1	-5.71	1.88e-06	0.618
HTDNTVQWLR	Q13576;F5H7S7;D6R939	Q13576	IQGAP2	-6.27	1.89e-06	0.619
FLSLYGDQIDMHR	Q96CN7;D6RGE2	Q96CN7	ISOC1	-5.17	1.89e-06	0.619
DAFDRNPELQNLLLDDFFK	P52209	P52209	PGD	-4.78	1.89e-06	0.619
GFQVAPEHHNDHK	P21399	P21399	ACO1	-6.51	1.9e-06	0.62
LLDTAFDLDVFK	Q02218;E9PCR7;E9PDF2;E9PFG7	Q02218	OGDH	-4.7	1.9e-06	0.62
VQDSWVTNGVPPGFGK	Q9UI17;Q8TCC6	Q9UI17	DMGDH	-4.87	1.91e-06	0.62
MLPLQGAQMLQMLEK	Q6IB77	Q6IB77	GLYAT	-7.6	1.92e-06	0.621
AGLTMNDIDAFEFHEAFSGQILANFK	P55084;F5GZQ3;B5MD38	P55084	HADHB	-6.88	1.92e-06	0.621
VLISDSLDPCCR	A0A286YF22;O43175;A0A2C9F2M7;A0A286YFL2;A0A286YFA2;A0A286YFM8;A0A286YFC8;A0A286YFB2;A0A286YER3;A0A286YF34;A0A286YFF3;A0A286YFK5	A0A286YF22	PHGDH	-6.97	1.92e-06	0.621
SIPDTYAEHLIAGGLMTQEEVSEIK	Q96HY7;H7C149	Q96HY7	DHTKD1	-5.4	1.93e-06	0.621
SFGSAQEFAWAHDSSEYAIR	H0YAC7;H0Y938;P35606;A0A7I2V258	H0YAC7	COPB2	-4.7	1.94e-06	0.622
CNSVLPGFIATPMTQK	Q92506	Q92506	HSD17B8	-5.13	1.94e-06	0.622
VCYEGQPVGEFIHCLQNHPEHM	P21695	P21695	GPD1	-7.2	1.95e-06	0.622
QATVVLNCVGPYR	Q8NBX0	Q8NBX0	SCCPDH	-5.64	1.95e-06	0.622
TIEYLEEVAITFAK	H0YFD6;P40939;A0A2R8Y4F5;A0A2R8YG21;A0A2R8Y688	H0YFD6	HADHA	-6.64	1.96e-06	0.623
FAQVLPDGTYVK	Q99424	Q99424	ACOX2	-5.73	1.97e-06	0.623
ELDIGISATYCGAHSVPK	Q96NU7	Q96NU7	AMDHD1	-5.16	1.99e-06	0.624
DLATVYVDVLK	P02647	P02647	APOA1	-5.09	1.99e-06	0.624
GLELIASENFCSR	P34897;G3V5L0;G3V540;G3V2W0;G3V241;G3V3Y8;G3V4T0;G3V2E4;G3V4W5;G3V4X0	P34897	SHMT2	-5.61	2e-06	0.625
LVNANGEAVYCK	P04040	P04040	CAT	-4.65	2.02e-06	0.626
SPPEPWGWPLLGHVLTLGK	P05177	P05177	CYP1A2	-5.3	2.02e-06	0.626
TFVDFFSQCLHEEYR	Q53GQ0;A0A1B0GV93	Q53GQ0	HSD17B12	-5.72	2.02e-06	0.626
KPYCNAHYPK	Q14847;C9J9W2;F6S2S5	Q14847	LASP1	-4.34	2.03e-06	0.626
YEITVTLQCAGNR	P51687	P51687	SUOX	-4.9	2.06e-06	0.628
HECQANGPEDLNR	P60981	P60981	DSTN	-5.5	2.07e-06	0.628
SVLTGGLDALEFIGK	Q8IWE2	Q8IWE2	FAM114A1	-4.98	2.08e-06	0.629
MDIDVPDVEVQGPDWHLK	Q09666	Q09666	AHNAK	-5.61	2.09e-06	0.63
STQDTVIALDALSAYWIASHTTEER	P0C0L4;P0C0L5;F5GXS0;A0A3B3ISA6;A0A0G2JPR0;A0A140TA49	P0C0L5	C4A;C4B	-5.6	2.09e-06	0.63
LLAVNNVCLEEVTHEEAVTALK	A0A0C4DFT3;A0A590UJD9;A0A590UJ08;A0A590UJC5;A0A590UJ18;E7EQD7;A0A590UK02;A0A590UJ25;A0A590UK70;B4E2H8;H7C166;A0A590UJ29;A0A590UK81;A0A590UJL2;A0A590UK52;A0A590UJZ4;Q12959;A0A590UK48;A0A590UJ64	A0A0C4DFT3	DLG1	-4.4	2.09e-06	0.629
MFTAGIDLMDMASDILQPK	M0R248;M0QZW4;Q13011	Q13011	ECH1	-7.05	2.09e-06	0.629
DLAQYDAAHHEEFK	Q02818;H7BZI1;C9JKZ2	Q02818	NUCB1	-4.22	2.1e-06	0.63
LNFSHGSHEYHAESIANVR	P30613;F8W6W2	P30613	PKLR	-7.61	2.1e-06	0.63
LLLGFSDAMTFK	Q9HAW7;H0Y8D7	Q9HAW7	UGT1A7	-5.56	2.1e-06	0.63
EGTIGDMAILGITESFQVK	P78371	P78371	CCT2	-4.99	2.11e-06	0.63
FTLTQSEADADILFNFSHFK	Q14166	Q14166	TTLL12	-4.02	2.11e-06	0.63
MKPDETPMFDPSLLK	Q96EK6;G3V4W4	Q96EK6	GNPNAT1	-6.55	2.14e-06	0.632
TVPFCSTFAAFFTR	P29401	P29401	TKT	-5.44	2.14e-06	0.632
GSSCFECTHYQSFLEYR	P21964;A0A7I2V370	P21964	COMT	-6.67	2.15e-06	0.632
DAVCEQVFR	P82980	P82980	RBP5	-5.16	2.15e-06	0.632
VVSMDENFHPLNELIPLVYIQDPK	P01023	P01023	A2M	-5.42	2.16e-06	0.633
ISQAEEEDQQLLGHLLLVAK	Q9BX68	Q9BX68	HINT2	-5.94	2.17e-06	0.633
TGLQAGLTIDEFAPR	P22033	P22033	MUT	-4.93	2.17e-06	0.633
SHVEQLVQNQFI	Q8IYQ7	Q8IYQ7	THNSL1	-4.73	2.17e-06	0.633
IILWDHDLNPER	B5MBZ0;Q9HC35	Q9HC35	EML4	-4.64	2.2e-06	0.635
IIGFGSALLEEVDPNPANFVGAGIIHTK	O94973;A0A0G2JS82;A0A8I5KY83	O94973	AP2A2	-5.19	2.21e-06	0.635
LAGENMTGAAK	O95831;A0A6Q8PG15;A0A6Q8PFM5;A0A7I2PK44;A0A6Q8PFE1;A0A6Q8PHJ9;A0A6Q8PHC0;A0A6Q8PFQ8;A0A6Q8PFS4;E9PMA0;A0A6Q8PHJ4	O95831	AIFM1	-6.63	2.22e-06	0.635
SIFSAVLDELK	P31327;A0A669KBF2	P31327	CPS1	-6.66	2.22e-06	0.635
INFLVNNGGGQFLSPAEHISSK	Q9BY49;B4DJS2	Q9BY49	PECR	-6.72	2.22e-06	0.635
INQDPQVMLAPLISIALK	P36871	P36871	PGM1	-6.46	2.23e-06	0.636
AEELGLPILGVLR	P09110;C9JDE9;H7C131	P09110	ACAA1	-5.17	2.24e-06	0.636
LVHDFTDAVIQER	P78329;A0A0A0MQR0;V9GYA1;Q08477;P98187	P78329	CYP4F2;CYP4F3;CYP4F8	-5.59	2.25e-06	0.637
GPSFDVQVGLHELLGHGSGK	Q9NY33;G3V1D3;G3V180	Q9NY33	DPP3	-5.51	2.25e-06	0.637
VCMDLNDTFPEYK	Q5SZC6;Q9Y2T3	Q9Y2T3	GDA	-5.17	2.25e-06	0.637
ISFPAIQAAPSFSNSFPQIFR	P23381;H0YJP3	P23381	WARS	-3.93	2.25e-06	0.637
HISQISVAEDDDESLLGHLMIVGK	P49773	P49773	HINT1	-6.98	2.26e-06	0.637
ILIDTGEPAIPEYISCLK	Q53H82	Q53H82	LACTB2	-4.85	2.26e-06	0.637
EADDIVNWLK	A0A7P0T9U6;A0A7P0Z4J0;A0A7P0Z4S2;A0A7P0TAX9;I3L4M2;A0A7P0T9D6;I3L514;P07237;A0A7P0TB26;A0A7P0TA71;A0A7P0TA35;A0A7P0TA97;A0A7P0T8X1;I3L3P5;A0A7P0T8J3;A0A7P0T9K9;I3L0S0	P07237	P4HB	-7.37	2.26e-06	0.637
FSSETWQNLGTLHR	F8W9U3;Q96IU4;B4DQI4	Q96IU4	ABHD14B	-7.13	2.29e-06	0.639
VCEAGGLFVNSPEEPSLSR	P34913;E5RFH6;E5RFU2	P34913	EPHX2	-6.38	2.29e-06	0.638
DVAAIAGGLVDAEALVALK	P28331;B4DJ81	P28331	NDUFS1	-4.67	2.29e-06	0.638
LIHEQDLEWLQQADVVVAEVTQPSLGVGYELGR	O43598;H0Y8X4	O43598	DNPH1	-5.42	2.3e-06	0.639
VIPSFMCQAGDFTNHNGTGGK	P30405;R4GN99;H0Y548	P30405	PPIF	-6.17	2.3e-06	0.639
SAGWNIPIGLLYCDLPEPR	P02787;C9JVG0	P02787	TF	-6.58	2.3e-06	0.639
EIADGLCLEVEGK	P13693;J3KPG2;Q5W0H4;A0A0B4J2C3;E9PJF7	P13693	TPT1	-5.94	2.3e-06	0.639
LVGRPPLPVPAVGIGTVHLHQHEDILAK	Q96HY7	Q96HY7	DHTKD1	-5.95	2.31e-06	0.639
ELADEALQK	Q9NR19	Q9NR19	ACSS2	-5.55	2.32e-06	0.64
NETLGGTCLNVGCIPSK	P09622;F8WDM5;F2Z2E3	P09622	DLD	-5.73	2.32e-06	0.64
EFPHLGVFSSLSPIPGFTK	O95822	O95822	MLYCD	-5.83	2.32e-06	0.64
NLLLAEVINIIK	H3BRN4;P80404;H3BNQ7	H3BRN4	ABAT	-6.74	2.33e-06	0.64
AFTSWTANTGIEACR	Q15067	Q15067	ACOX1	-4.42	2.34e-06	0.641
SGETEDTFIADLVVGLCTGQIK	P06733;A0A2R8Y6G6;P09104;F5H0C8;P13929	P06733	ENO1;ENO2;ENO3	-6.18	2.34e-06	0.641
NLHGDGIALWYTR	D6RIU4;Q12907;D6RBV2;D6RDX1;D6RBH1	Q12907	LMAN2	-5.52	2.34e-06	0.641
LLETIDQLYLEYAK	A0A804HII9;A0A804HK61;A0A7I2V4Y4;A0A804HLF4;H7C5W8;H0YJ11;A0A804HIN7;A0A804HL31;P12814	A0A804HII9	ACTN1	-6.74	2.35e-06	0.641
HENYGLMPLNGVLR	P31513	P31513	FMO3	-7.21	2.36e-06	0.642
QLIQGGVAECVLALGFEK	P22307;E9PLD1;H0YCB0	P22307	SCP2	-7.2	2.36e-06	0.641
SEGETIMSSSMGK	P48444;B0YIW6	P48444	ARCN1	-4.96	2.39e-06	0.643
VQGIGWYLDEK	O95954;A0A0G2JQF2;B7WPK3	O95954	FTCD	-6.96	2.39e-06	0.643
WGDAGAEYVVESTGVFTTMEK	P04406;E7EUT5	P04406	GAPDH	-5.08	2.39e-06	0.642
VDGLLTCCSVLINK	O94760;B4DYP1	O94760	DDAH1	-6.03	2.4e-06	0.643
ELHSEFSEVMNEIWASDQIR	H0YFD6;P40939;A0A2R8Y4F5;A0A2R8YG21;A0A2R8Y688	H0YFD6	HADHA	-6.68	2.41e-06	0.644
ANNSQEPSPQLASSVASTR	Q96HC4;H0Y8Y3	Q96HC4	PDLIM5	-4.21	2.41e-06	0.643
ADLVISHAGAGSCLETLEK	Q9NP73;A0A096LNJ4;A0A087WX43;D6RE84;A0A087WTT9;A0A1B0GVW6	Q9NP73	ALG13	-4.09	2.42e-06	0.644
HFVPSAGADSETHC	Q9Y6L6	Q9Y6L6	SLCO1B1	-5.1	2.43e-06	0.644
TAAQCLEHYEFLLDK	Q99459	Q99459	CDC5L	-4.24	2.45e-06	0.645
VHIISFK	A0A6Q8PHC6;P50440;A0A6Q8PGA2;A0A6Q8PFC6	A0A6Q8PHC6	GATM	-7.55	2.45e-06	0.645
AMTDTFTLQAHDQFSPFSSSSGR	Q96RQ3;E9PHF7;E9PG35	Q96RQ3	MCCC1	-5.43	2.45e-06	0.645
AYPDVAALSDGYWVVSNR	O14773;A0A804HJ17;A0A2R8YD45;A0A2R8Y7U1;A0A2R8YGD1	O14773	TPP1	-5.7	2.45e-06	0.645
ISELSGCTPDPR	C9JVN9;Q9H9P8	Q9H9P8	L2HGDH	-4.06	2.47e-06	0.646
FLAAGTHLGGTNLDFQMEQYIYK	C9J9K3;P08865;A0A0C4DG17;F8WD59	C9J9K3	RPSA	-5.91	2.47e-06	0.646
LQPHEFQGGTFTISNLGMFGIK	A0A7P0TBE2;P10515;A0A7P0Z4G4;A0A7P0TAG1;A0A7P0T997;A0A7P0TAX2;H0YDD4;E9PEJ4;A0A7P0TBK2;A0A7P0TA47	A0A7P0TBE2	DLAT	-5.44	2.48e-06	0.646
VDINAPDVEVHGPDWHLK	Q09666	Q09666	AHNAK	-5.47	2.49e-06	0.647
LLGSTIPLCSAQWER	P50416;H3BMD2	P50416	CPT1A	-4.39	2.49e-06	0.647
INEAVECLLSLK	P07814;V9GYZ6	P07814	EPRS	-4.09	2.49e-06	0.646
MVVPVAALFTPLK	F5H365;Q15436;G3V4V1;G3V1W4;G3V3G5;G3V2R6;G3V5X8;G3V4Q2	F5H365	SEC23A	-5.66	2.51e-06	0.647
QNVAVNELCGR	Q15942;H0Y2Y8;C9JJK5	Q15942	ZYX	-4.95	2.51e-06	0.647
AAAPAPVSEAVCR	A0A0C4DGB5;A0A6Q8PG72;A0A6Q8PGG5;H0Y7F0;H0Y9H6;E7EQ12;E7EQA0;H0YD33;A0A6Q8PGN6;A0A6Q8PH20;B7Z574;E7EVY3;P20810;E7ES10;A0A6Q8PFE5;E9PDE4	A0A6Q8PH20	CAST	-4.89	2.52e-06	0.648
KVEFIQELPK	Q53FZ2;H3BSM0;H3BUF2	Q53FZ2	ACSM3	-5.44	2.53e-06	0.648
YNSHLVPEDGTLTCSDPGIYVLR	O76054;B3KRD8	O76054	SEC14L2	-7.1	2.53e-06	0.648
YGNIDAVHLK	P23378;A0A1W2PP74;A0A1W2PQV3;A0A1W2PQU6	P23378	GLDC	-6.61	2.54e-06	0.648
VELSDVQNPAISITENVLHFK	Q9P035	Q9P035	HACD3	-6.38	2.54e-06	0.648
YPYWPHQPIENL	O75947	O75947	ATP5H	-5.76	2.55e-06	0.649
TYITDPVSAPCAPPLQPK	Q93052;C9JUT4;A0A087WZF1;C9JXK9	Q93052	LPP	-4.82	2.56e-06	0.649
EQLGPVTQEFWDNLEK	P02647;F8W696;CON__P15497	P02647	APOA1	-7.66	2.57e-06	0.65
YLAEVACGDDR	P27348;E9PG15	P27348	YWHAQ	-4.75	2.57e-06	0.649
GNVLPPGTEGDIGIR	Q08AH3;F5GWL3;Q68CK6;H3BTX9;A0A087WU25	Q68CK6	ACSM2A;ACSM2B	-6.37	2.59e-06	0.65
FAHTNVESLVNEYDDNGEGIILFRPSHLTNK	P30101;A0A8I5KT88;A0A8I5KW33;A0A8I5KS72;A0A8I5KNU9;A0A8I5KW00;A0A8I5QKQ5;A0A8I5KXC9;A0A8I5KPY2;A0A8I5KRV3;A0A8I5KYJ6;A0A8I5KXE2	P30101	PDIA3	-7.64	2.59e-06	0.65
TFAYTNHTVLPEALER	P06737;E9PK47	P06737	PYGL	-4.53	2.59e-06	0.651
HYGFQLYQSDPSGNYGGWK	P25789;H0YMZ1;H0YN18;H0YL69;H0YMA1;H0YMI6;H0YLC2;H0YKS0;H0YMV3;H0YKT8	P25789	PSMA4	-5.12	2.61e-06	0.651
DNPLVNYTHLPTTVMDHSK	O43704	O43704	SULT1B1	-5.63	2.61e-06	0.651
YYASEIAGQTTSK	P45954	P45954	ACADSB	-8.03	2.62e-06	0.652
VVANSGFDVLCHALESYTTLPYHLR	Q8IWW8	Q8IWW8	ADHFE1	-5.17	2.65e-06	0.652
KEPLFGISTGNLITGLAAGAK	P31327	P31327	CPS1	-5.8	2.65e-06	0.653
YGWLAAPQAYVSEK	Q04446;E9PGM4	Q04446	GBE1	-4.59	2.66e-06	0.653
FWEVISDEHGIDPTGTYHGDSDLQLDR	Q5JP53;P07437	Q5JP53	TUBB	-6	2.67e-06	0.653
MAEHSYSSLGLK	Q08AH3;F5GWL3;H3BRR3;Q68CK6;H3BTX9	Q68CK6	ACSM2A;ACSM2B	-6.92	2.68e-06	0.654
ALVDELEWEIAQVDPK	Q9Y2B0	Q9Y2B0	CNPY2	-5.82	2.68e-06	0.654
HYWEVTVK	Q8WW59	Q8WW59	SPRYD4	-5.77	2.69e-06	0.654
IGNQVLPPGASLGNGLTPEAAR	A0A0U1RRI8;Q96C11;F2Z2V1;A0A0U1RRB9;A0A0U1RQJ1	Q96C11	FGGY	-5.21	2.7e-06	0.654
LTESPCALVASQYGWSGNMER	P14625;A0A7P0TAT8;H0YIV0;A0A7P0TAE1;A0A7P0T823;A0A087WT78;A0A7P0T917	P14625	HSP90B1	-5.7	2.7e-06	0.654
IGTIYEGASNIQLNTIAK	P45954	P45954	ACADSB	-5.32	2.71e-06	0.655
VVCSSGAVGNYSGGLAVK	B4DEE8;P16455	B4DEE8	MGMT	-5.02	2.71e-06	0.655
EYEAEGIAK	A0A804HJ24;Q9HCC0;A0A804HJ84;A0A804HLJ9;A0A804HK37;A0A804HKE8;A0A804HJL2;A0A804HJC1;A0A804HKH3;A0A804HJ31;A0A804HL02	A0A804HJ24	MCCC2	-6	2.72e-06	0.655
LELELRPTGEIEQYSVSATYELQR	P04114	P04114	APOB	-4.74	2.73e-06	0.655
IQLPWDSVGR	P54868	P54868	HMGCS2	-8.11	2.73e-06	0.655
AESTFLFLVGQDDHNWK	Q86TX2;G3V4F2;A0A087WT95;P49753	A0A087WT95	ACOT1;ACOT2	-5.54	2.74e-06	0.656
TVGQCLETTAQR	Q96CM8;E9PF16;D6RF87	Q96CM8	ACSF2	-4.15	2.74e-06	0.656
ESYGQTETGLTCMVSK	Q08AH3;F5GWL3	Q08AH3	ACSM2A	-5.76	2.74e-06	0.656
KPLEALYGYDYFAR	Q86WA6	Q86WA6	BPHL	-6.05	2.74e-06	0.656
ENHLAASSVPDQK	A0A0D9SG04;A0A0X1KG75;Q53SF7	A0A0D9SG04	COBLL1	-4.65	2.75e-06	0.656
LDELYGTWR	P36578;H3BM89	P36578	RPL4	-5.36	2.75e-06	0.656
WFTPASEVPLCGHATLASAAVLFHK	P30039;A0A0C4DFS0	P30039	PBLD	-6.57	2.76e-06	0.656
GHQAVVLTPEVNMHIK	P22310;P35503	P22310	UGT1A4;UGT1A3	-6.22	2.76e-06	0.656
HLGGIPWTYAEDAVPTLTPCR	P31930	P31930	UQCRC1	-6	2.77e-06	0.657
LDYNNIPTVVFSHPPIGTVGLTEDEAIHK	P00390	P00390	GSR	-6.26	2.78e-06	0.657
SYLNMDAIMEAIK	P05165;A0A1B0GU58;A0A1B0GWI4;A0A1B0GUX9;A0A1B0GWA1;A0A1B0GTR1	P05165	PCCA	-4.54	2.78e-06	0.657
IGDQEFDHLPALLEFYK	P46109	P46109	CRKL	-4.3	2.79e-06	0.658
MIHGNPSGVDNAVSTWGGALR	F5H8H2;Q03426;A0A1B0GWC2;A0A1B0GWF3	F5H8H2	MVK	-5.34	2.81e-06	0.658
YCNTWPVAISMLASK	Q00796	Q00796	SORD	-7.12	2.81e-06	0.658
MALELLTQEFGIPIER	P49588;A0A6Q8PGN5;A0A6Q8PFY2;A0A6Q8PF33;A0A6Q8PGE8;H3BPK7;A0A6Q8PGR9;A0A6Q8PGB5;A0A6Q8PFK3;A0A6Q8PHJ2;A0A6Q8PH44;A0A6Q8PHP7;A0A6Q8PHP3;A0A6Q8PF77;A0A6Q8PG28;A0A6Q8PG62;A0A6Q8PGI8	P49588	AARS	-4.91	2.84e-06	0.659
EDILNYLEK	P11182;A0A7P0Z494;Q5VVL7;A0A7P0T9W1	P11182	DBT	-5.59	2.84e-06	0.659
NFINNPLAQADWAAK	P35579;A0A8I5KWT8;A0A8I5KYI1;Q5BKV1;A0A8I5KU92;B1AH99	P35579	MYH9	-5.43	2.84e-06	0.659
EVVADSVWVDVK	P01024;CON__Q2UVX4	P01024	C3	-5.3	2.87e-06	0.66
SHGQDYLVGNK	P08263;P09210	P08263	GSTA1;GSTA2	-5.49	2.88e-06	0.66
TMLDSLWAAGQELQAWK	Q3LXA3;H0YCY6;I3L252	Q3LXA3	DAK;TKFC	-6.27	2.89e-06	0.661
FIQENIFGICPHMTEDNK	P30101;A0A8I5KT88;A0A8I5KW33;A0A8I5KS72;A0A8I5KNU9;A0A8I5KW00;A0A8I5QKQ5;A0A8I5KXC9;A0A8I5KPY2;A0A8I5KRV3;A0A8I5KYJ6;A0A8I5KXE2;A0A8I5KTA1	P30101	PDIA3	-5.53	2.92e-06	0.662
YSHVQEVQER	Q93008;O00507	Q93008	USP9X;USP9Y	-4.12	2.92e-06	0.662
VCIESEHSMDTLLATLK	E5RGN3;O00244;E5RIM7	O00244	ATOX1	-5.45	2.93e-06	0.662
IIWELIK	O75874;C9J4N6;C9JLU6;C9JJE5	O75874	IDH1	-7.45	2.93e-06	0.662
YVGGQEHFAHLLILR	P02763	P02763	ORM1	-6.27	2.94e-06	0.662
KVELFHYQDGAFHTEYNR	Q14554;C9JY10	Q14554	PDIA5	-5.27	2.94e-06	0.662
WIDIHNPATNEVIGR	Q02252	Q02252	ALDH6A1	-6.55	2.95e-06	0.663
HPDFATTGQWDVTTER	P31513;V9GZ60	P31513	FMO3	-6.7	2.95e-06	0.663
ILEQEAGMLLPR	O14841;A0A087WY99	O14841	OPLAH	-4.6	2.95e-06	0.663
MTLVEEGFNPAVIK	O14975;G3V1R7	O14975	SLC27A2	-5.94	2.98e-06	0.664
MPLIGLGTWK	P14550;Q5T621;V9GYP9;V9GYG2	P14550	AKR1A1	-6.96	2.99e-06	0.664
YPSYIHK	Q86WA6;B4DML3;Q49AI2	Q86WA6	BPHL	-5.98	2.99e-06	0.664
AGSPFSPPPSSSSLTGEAAISR	Q96JY6;C9JS55;C9JSR2;C9K0F0;C9J0X3;C9J760;A0A087WXJ0	Q96JY6	PDLIM2	-4.15	2.99e-06	0.664
FEEEGNPYYSSAR	A0A804HJ24;Q9HCC0;A0A804HJ84;A0A804HLJ9;A0A804HK37;A0A804HKE8;A0A804HJL2;A0A804HJC1;A0A804HJ31;A0A804HL02	A0A804HJ24	MCCC2	-4.9	3e-06	0.664
IPIHNEDITYDELVLMMQR	A0A6Q8PFY7;Q92734;A0A6Q8PFC4;A0A6Q8PH89;A0A6Q8PH27;A0A6Q8PG00;A0A6Q8PG04;A0A6Q8PGS4;A0A6Q8PF40;C9JJP5;C9JUE0;C9JTY3;A0A6Q8PF51	A0A6Q8PFY7	TFG	-5.98	3.02e-06	0.665
QREPGLGFSFEFTEQQK	Q5T4U5;P11310;F6YB23;A0A7P0T932;A0A7P0TB51;A0A7P0TAB2;A0A7P0TBD1;A0A7P0T8J9;A0A7P0TA63;E9PJM9;A0A7P0TA39;A0A7P0TB28;E9PRX4;A0A7P0T9W7	Q5T4U5	ACADM	-6.93	3.03e-06	0.665
LHLETDSLALVALGALDTALYAAGSK	P0C0L4;P0C0L5;F5GXS0;A0A3B3ISA6;A0A0G2JPR0;A0A140TA49	P0C0L5	C4A;C4B	-5.2	3.03e-06	0.665
SLAAEEEAAR	E9PMV1;A0A8I5KUE3;A0A8I5KYZ1;A0A8I5KSD5;Q15149	Q15149	PLEC	-5.03	3.03e-06	0.665
MPFVPTNYYTLK	B3KTU4;A0A1B0GVP5;A0A1B0GUH1;P48728;A0A1B0GTM2;A0A1B0GWC4;A0A1B0GTV8;A0A1B0GUU7	P48728	AMT	-4.5	3.04e-06	0.665
APVNTAELTDLLIQQNHIGSVIK	Q9P287	Q9P287	BCCIP	-4.21	3.04e-06	0.665
NYLPAINGIVFLVDCADHER	Q9H029;D6R9R5;Q9Y6B6;D6RD69;D6RDB2	Q9Y6B6	DKFZp434B2017;SAR1B	-5.25	3.06e-06	0.666
SLTEHGVAATDGR	B7ZB24;A0A075B6R8;H0YGQ3;O75970;F5H1U9	O75970	MPDZ	-4.94	3.06e-06	0.666
NPAIIFEDANLDECIPATVR	Q9H2A2	Q9H2A2	ALDH8A1	-6.63	3.07e-06	0.666
TPSNTPSAEADWSPGLELHPDYK	Q9Y3Z3;A0A2R8YCS7;A0A2R8YD90;A0A2R8YF51;A0A2R8Y5D2;A0A804HL67;A0A2R8Y586;A0A2R8Y7R5;A0A2R8Y755	Q9Y3Z3	SAMHD1	-5.08	3.07e-06	0.666
VATPVDWKDGDSVMVLPTIPEEEAK	P30041	P30041	PRDX6	-7.04	3.08e-06	0.667
QLLEQPQAEAK	A0A5H1ZRP7;A0A7P0TAX0;A0A7P0Z4P7;H0Y304;A0A5H1ZRP9;A0A804HKR4;P11532;A0A5H1ZRP8;A0A075B6G3;A0A087WV90	P11532	DMD	-4.27	3.09e-06	0.667
VSDLAGLDVGWK	Q08426	Q08426	EHHADH	-6.57	3.12e-06	0.668
TATEAADDIINNHLPK	Q96NU7	Q96NU7	AMDHD1	-5.3	3.13e-06	0.668
VLPFFERPDFQLFTGNK	Q96HE7	Q96HE7	ERO1L	-5.07	3.15e-06	0.669
AVPLALALISVSNPR	Q13200;H7C1H2	Q13200	PSMD2	-5.49	3.19e-06	0.67
ADAEYYAAHK	O75477;B0QZ43	O75477	ERLIN1	-5.28	3.2e-06	0.67
SQATSPGQTNGDSSLEVLATR	Q96JY6;C9JS55;C9JSR2;C9K0F0;C9J0X3;C9J760	Q96JY6	PDLIM2	-4.1	3.21e-06	0.67
EHMQPTHPIR	P61981	P61981	YWHAG	-6.31	3.22e-06	0.671
AVIFEDCAVPVANR	Q9UKU7	Q9UKU7	ACAD8	-4.49	3.25e-06	0.671
SVYAHFPINVVIQENGSLVEIR	P32969;A0A2R8Y5Y7;D6RAN4;H0Y9V9	P32969	RPL9	-5.98	3.26e-06	0.672
EGYVPQEEVPVYENK	Q9BRP8	Q9BRP8	WIBG	-3.85	3.26e-06	0.672
EGIVVESNHDSHMAK	Q5T2W1	Q5T2W1	PDZK1	-6.34	3.27e-06	0.672
ALDCSEVTVR	Q6XQN6;G5E977;C9J8U2;H0YF31	Q6XQN6	NAPRT	-4.63	3.28e-06	0.672
LDTIFFAK	Q9Y5K5;Q5LJA5;Q5LJA9;Q5LJB0	Q9Y5K5	UCHL5	-4.58	3.28e-06	0.672
DAVLLLFANK	P18085;C9JAK5;C9JPM4;U3KQF2	P18085	ARF4	-5.05	3.31e-06	0.673
DAGYEISLGLMPK	Q9UDR5;F8WAH1;F8WE53;A0A7P0T9N4	Q9UDR5	AASS	-5.24	3.33e-06	0.674
ITDLANLSAANHDAAIFPGGFGAAK	A0A096LPI6;A0A096LNH5;A0A096LP73;A0A2R8YDR7;P0DPI2;A0A0B4J2D5;F2Z2Q0;A0A096LP12;A0A2R8Y6K9;A0A096LNJ1;H7C1F6;H7C2G3	P0DPI2	C21orf33	-5.3	3.34e-06	0.674
FGGEHVPNSPFQVTALAGDQPSVQPPLR	P21333;H0Y5F3;Q60FE5	P21333	FLNA	-5.77	3.35e-06	0.674
ICEEAFAR	Q02218;E9PCR7;E9PDF2;E9PFG7	Q02218	OGDH	-4.57	3.35e-06	0.674
ADIINVVNGPITYSPDILPMVGPHQGVR	Q9UI17;Q8TCC6	Q9UI17	DMGDH	-4.9	3.36e-06	0.675
TYSYLTPDLWK	P15880;H0YEN5;E9PQD7	P15880	RPS2	-5.37	3.36e-06	0.674
NDDVINSSSYR	Q6NUN0	Q6NUN0	ACSM5	-5.56	3.38e-06	0.675
CPVMLVVGDQAPHEDAVVECNSK	G3V4S9;G3V5H8;G3V578;H0YJT9;G3V5L7;Q9UN36	Q9UN36	NDRG2	-5.99	3.38e-06	0.675
FGVVGFHESLSHELK	Q8IZV5;E5RK48	Q8IZV5	RDH10	-4.59	3.38e-06	0.675
ASEAHCHYVVVK	Q15067;K7ESC7	Q15067	ACOX1	-5.16	3.39e-06	0.675
NLAFMESDILEK	P33261	P33261	CYP2C19	-7.3	3.41e-06	0.676
CGNCGPGYSTPLEAMK	H0Y532;Q13228;A6PVX1	Q13228	SELENBP1	-4.8	3.41e-06	0.676
TEFENIIMQLVK	P36537	P36537	UGT2B10	-5.93	3.42e-06	0.676
ELDFVSHHVR	Q02818;H7BZI1;C9JKZ2;C9JBD3;C9J3C1	Q02818	NUCB1	-6.13	3.43e-06	0.676
AGLTHLITMDLHQK	O60256;E7EPA1;C9K0K7;C9JJS3;C9JDU5	O60256	PRPSAP2	-4.99	3.43e-06	0.676
EMVPIIAQYGDVLVR	A0A499FJM4;P08684;A0A494C0W7;P24462;A0A087WV96	A0A499FJM4	CYP3A4;CYP3A7	-7.17	3.48e-06	0.677
GHIEDCGHWTQMDKPTEVNQILIK	P34913;E5RFH6;E5RFU2	P34913	EPHX2	-6.67	3.49e-06	0.678
DIAFEVEDCDYIVQK	A0A0B4J1R4;P32754	P32754	HPD	-6.41	3.49e-06	0.678
VTHETSAHEGQTEAPSIDEK	P15374;A0A087WTB8	P15374	UCHL3	-5.5	3.5e-06	0.678
WLSMNVLMLDEK	A0A6Q8PHC6;P50440;A0A6Q8PGA2	A0A6Q8PHC6	GATM	-6.8	3.51e-06	0.678
VHAIQCDVR	E5RJD2;Q16698;E5RFV2;E5RJG7	Q16698	DECR1	-6.44	3.53e-06	0.679
HGCAFLVDEVQTGGGCTGK	H3BRN4;P80404;H3BNQ7	H3BRN4	ABAT	-6.13	3.54e-06	0.679
VCHAHPTLSEAFR	P09622;E9PEX6	P09622	DLD	-6.43	3.55e-06	0.679
LTAGEACAQGLVTEVFPDSTFQK	A0A0C4DGA2;O75521	A0A0C4DGA2	ECI2	-5.39	3.55e-06	0.679
SGILAAESIFNQLTSENLQSK	Q16134;B4DEQ0;A0A804HL84;A0A804HL81;A0A804HJK8;A0A804HK05;A0A804HJT7;A0A804HKB8;A0A804HI80	Q16134	ETFDH	-6.19	3.55e-06	0.679
DASVAEAWLLGQEPYLSSR	A0A087WUZ3;Q01082	Q01082	SPTBN1	-5.19	3.56e-06	0.68
ALEQKPDDAQYYCQR	Q9Y2Z0	Q9Y2Z0	SUGT1	-4.75	3.57e-06	0.68
EIENMILNDPDFQHEDLNFLTR	Q15067;K7ELT1;I3L0T4	Q15067	ACOX1	-5.84	3.58e-06	0.68
LVITNGMVIPNYSSR	Q96N76	Q96N76	UROC1	-5.37	3.6e-06	0.681
ERDSASFNPELLTHILDGSPEK	Q15067;K7ELT1;I3L0T4;I3L2U4	Q15067	ACOX1	-6.62	3.63e-06	0.681
HIGYDDSAK	Q00266	Q00266	MAT1A	-7.08	3.63e-06	0.681
GEVITTYCPANNEPIAR	A0A1B0GTY9;H0YHM6;F8WDY6;F8VVF2;A0A1B0GW77;P49419;A0A1B0GTG2;A0A1B0GUA1;A0A1B0GW82;A0A0J9YWF7	A0A1B0GW77	ALDH7A1	-6.97	3.66e-06	0.682
NADVNELQEIASEPDSTHVYNVAEFDLMHTVVESLTR	Q05707;J3QT83;Q4G0W3;H0YBB2	Q05707	COL14A1	-4.88	3.66e-06	0.682
LGIVNVDEAVLHFK	Q6ZUJ8	Q6ZUJ8	PIK3AP1	-4.61	3.67e-06	0.682
LFQEHPIFSEVISDQEAVAAIEK	P20132	P20132	SDS	-4.38	3.67e-06	0.682
HPPFSPPEPPLSSPASQHK	E9PCX8;Q68CZ2	Q68CZ2	TNS3	-3.88	3.67e-06	0.682
AGGLLVIDHR	Q14749	Q14749	GNMT	-7.44	3.69e-06	0.683
CDEPILSNR	P30086	P30086	PEBP1	-3.95	3.69e-06	0.683
ESFVSLGHNVFENDSFLQR	P22309	P22309	UGT1A1	-7.47	3.69e-06	0.683
DLATALEQLLQAYPR	P55957	P55957	BID	-5.73	3.7e-06	0.683
IHNAENIQPGEQK	E7EUU4;E7EX73;C9K073;C9J2Z7;A0A6Q8PFB2;E9PGM1;Q04637;A0A7I2Y1C3;C9JF13;C9J6B6	Q04637	EIF4G1	-5.07	3.72e-06	0.683
LWTLVSEQTR	P46776;E9PLL6;E9PJD9	P46776	RPL27A	-6.05	3.72e-06	0.683
AAIAWEAGK	P08319;D6R9K8;D6RIB1	P08319	ADH4	-6.44	3.73e-06	0.684
GVDEGPNGLK	P21695	P21695	GPD1	-4.96	3.73e-06	0.684
FGVEHGVDIVFASFVR	P30613	P30613	PKLR	-6.44	3.73e-06	0.684
VQLAEPDLEQAAHLIQALSNHEDVIHVYDNIE	Q9BSH4;A0A804HJB7	Q9BSH4	TACO1	-5.21	3.74e-06	0.684
GTSTETVPNANISGGSVVADLNGLAVK	Q06278	Q06278	AOX1	-6.27	3.75e-06	0.684
YTPEQVAMATVTALHR	P05062;A0A3B3IS80	P05062	ALDOB	-4.27	3.78e-06	0.685
LDNCHSTPLHVAEYMLDAAR	P35573	P35573	AGL	-6.76	3.79e-06	0.685
AITIAGVPQSVTECVK	Q15365	Q15365	PCBP1	-5.98	3.79e-06	0.685
FILNLPTFSVR	A0A087WVV1;P49721	P49721	PSMB2	-6.47	3.8e-06	0.685
NVLPVLNNLLENR	A3KMH1	A3KMH1	VWA8	-4.39	3.8e-06	0.685
LCDAVAVLLNMR	P48449;A0A0G2JQD0	P48449	LSS	-4.51	3.81e-06	0.685
GPAFNMASPESDFGINLK	Q09666	Q09666	AHNAK	-4.5	3.82e-06	0.686
NQDNLQGWNK	P30085;Q5T0D2	P30085	CMPK1	-7.19	3.82e-06	0.686
FLNDTSLPHSCFR	E9PDF6;O43795;A0A0U1RRI3	E9PDF6	MYO1B	-4.8	3.82e-06	0.686
MTEEEVEMLVAGHEDSNGCINYEAFVR	P60660;J3KND3;G3V1Y7	P60660	MYL6	-4.85	3.83e-06	0.686
GTPEQPQCGFSNAVVQILR	Q86SX6	Q86SX6	GLRX5	-4.68	3.86e-06	0.687
YFSLPSVVFAR	O60656;Q9HAW9;Q9HAW7;H0Y8D7	O60656	UGT1A9;UGT1A8;UGT1A7	-5.49	3.86e-06	0.687
SHFEQWGTLTDCVVMR	P09651;A0A7I2V3R8;F8W6I7;A0A7I2V3W0;A0A7I2V2L6;F8VZ49;F8W646;Q32P51	P09651	HNRNPA1;HNRNPA1L2	-5.78	3.89e-06	0.687
HIDCAAIYGNEPEIGEALK	P14550;Q5T621;V9GYP9;V9GYG2	P14550	AKR1A1	-6.66	3.92e-06	0.688
TLELQGLINDLQR	P15924	P15924	DSP	-4.33	3.92e-06	0.688
LEDEHLVFFCQMGK	Q8NFU3;R4GNF9	Q8NFU3	TSTD1	-5.22	3.92e-06	0.688
EIGLLSEEVELYGETK	A0A494C1T2;P11586;V9GYY3;F5H2F4;V9GZ78	P11586	MTHFD1	-5.9	3.93e-06	0.688
GAASSVLELTEAELVTAEAVR	O75891	O75891	ALDH1L1	-7.28	3.94e-06	0.688
DVDPGEHYILK	P05089;A0A5F9ZGN6	P05089	ARG1	-4.78	3.95e-06	0.689
ALLELQLEPEELYQTFQR	P13639	P13639	EEF2	-5.53	3.97e-06	0.689
TALHVAAAEGHIEVVK	Q9UI32;A0A087X004	Q9UI32	GLS2	-5.19	3.97e-06	0.689
NITLSLVANPSHLEAVDPVVQGK	Q9ULD0	Q9ULD0	OGDHL	-4.92	3.98e-06	0.689
YGLLLLLK	P10632;B7Z1F5;G3V188;A0A0D9SG51;P33260;A0A087X0B3	P10632	CYP2C8;CYP2C18	-6.09	3.99e-06	0.689
FPFLGVHFTPR	C9JVN9;Q9H9P8	Q9H9P8	L2HGDH	-4.8	4e-06	0.69
DILATNGVIHYIDELLIPDSAK	Q15582;H0Y8L3;S4R3C6;H0Y9D7	Q15582	TGFBI	-5.47	4.01e-06	0.69
SWEEQMIEVGR	Q00059	Q00059	TFAM	-4.74	4.03e-06	0.69
DSVMVLSATHR	O43741	O43741	PRKAB2	-5.18	4.04e-06	0.691
VPADLGAEAGLQQLLGALR	P35270	P35270	SPR	-6.7	4.04e-06	0.691
TVSLPDLRPGTTYHVEVHGVR	A0A3B3ISX9;A0A087WWA5	A0A3B3ISX9	TNXB	-4.27	4.05e-06	0.691
ASQDMFDK	P54868	P54868	HMGCS2	-8.28	4.07e-06	0.691
IGSSLYALGTQDSTDICK	Q9UNH7;A0A0A0MRI2	Q9UNH7	SNX6	-4.22	4.07e-06	0.691
SWIEEQAMGSFLSVAK	H0Y9Q1;P28838	P28838	LAP3	-5.72	4.08e-06	0.691
QAEGVLSSQEYVLSHTEMPGTLQAADAAIK	O15020;A0A087WYQ1	O15020	SPTBN2	-3.86	4.08e-06	0.691
LHHVSSLAWLDEHTLVTTSHDASVK	O75083	O75083	WDR1	-5.34	4.08e-06	0.691
EILHSVYECIEK	A0A8I5KXY7;A6NP46;F8WC39;P32189;Q14409	P32189	GK;GK3P	-5.34	4.09e-06	0.692
ETPSSSPASPQETR	Q9BX66;S4R406	Q9BX66	SORBS1	-5.83	4.09e-06	0.692
GQYVHTGSSGAASTQSLFTACYTY	P05062	P05062	ALDOB	-6.19	4.11e-06	0.692
GIQVSNNGPCLGSR	P33121;E7EPM6;D6RER0	P33121	ACSL1	-4.62	4.12e-06	0.692
MQHLNPDPQLIPEQITTDITPECLVSPR	H0YJ34;A0A0U1RRM8;H0YJB6;Q96AC1	Q96AC1	FERMT2	-4.72	4.12e-06	0.692
GVLETFSGTETNK	Q9UIJ7	Q9UIJ7	AK3	-5.65	4.14e-06	0.693
APLAEEWDNMTMK	P27338	P27338	MAOB	-5.07	4.16e-06	0.693
LNQVCATHQHFESR	E9PDF6;O43795;A0A0U1RRI3	E9PDF6	MYO1B	-5.06	4.16e-06	0.693
SCCSCCPVGCAK	P02795;Q8N339;P04732;CON__P67983;P13640;P80297	P02795	MT2A;MT1M;MT1E;MT1G;MT1X	-6.25	4.18e-06	0.693
TFSGQTHGFVHR	Q96DG6	Q96DG6	CMBL	-4.44	4.2e-06	0.694
VELFHYQDGAFHTEYNR	Q14554;C9JY10	Q14554	PDIA5	-5.4	4.2e-06	0.694
SNAAAYLQHLCYR	A0A669KB05;A0A669KB62;C9JZR2;H0YC95;O60716;E9PKY0	C9JZR2	CTNND1	-5.48	4.21e-06	0.694
DLEQPTYR	A0A087X0K9;Q07157;G3V1L9;A0A0G2JNH2;A0A7I2V5U5;G5E9E7	A0A087X0K9	TJP1	-4.28	4.23e-06	0.694
NDLMEYAK	P00966;Q5T6L6;Q5T6L5	P00966	ASS1	-4.54	4.24e-06	0.695
NHPWLELSDVHR	Q9Y2S7;B4DEM9	Q9Y2S7	POLDIP2	-4.43	4.25e-06	0.695
AVQALCAVYEHWVPR	O60701	O60701	UGDH	-6.55	4.25e-06	0.695
LVWIETPTNPTQK	P32929	P32929	CTH	-7.02	4.26e-06	0.695
VQELQQQSAR	M0QY43;Q7Z406	Q7Z406	MYH14	-4.88	4.27e-06	0.695
IPIGFIPLGETSSLSHTLFAESGNK	E9PC15;Q53H12;A0A3B3ITD0;A0A3B3ISZ0;A0A3B3ISY9;E9PG39;A0A3B3ITX7;A0A3B3ITV0;A0A3B3IUC9	E9PC15	AGK	-4.22	4.29e-06	0.696
FCLEGMEESGSEGLDELIFAR	Q96KP4;J3QKT2;J3QRA8;J3QRH4	Q96KP4	CNDP2	-5.28	4.32e-06	0.696
AFENDVDALCNLR	E9PDR0;P05166;C9JQS9;E7EX59;E7ETT1;E7ETT4;E7EUY3;E9PEC3;F8WBI9;E7ENC1	E9PDR0	PCCB	-5.53	4.35e-06	0.697
AAGCDFTNVVK	P52758;H0YB34;H0YBX3	P52758	HRSP12	-7.13	4.36e-06	0.697
GYFIQPTVFGDVQDGMTIAK	P05091;S4R3S4	P05091	ALDH2	-6.54	4.37e-06	0.697
APVLNLNQGMDNGR	O95210	O95210	STBD1	-5.35	4.38e-06	0.697
ISSNVDVALLWR	P55157	P55157	MTTP	-5.09	4.39e-06	0.698
ESVLAGCEFPLHQENSEMCK	E9PBP6;P55157	P55157	MTTP	-6.51	4.4e-06	0.698
GLHGPLTLNSPLTPEK	Q06278;H7BXF7;H7C3Q1	Q06278	AOX1	-6.25	4.41e-06	0.698
TYLPAVDEK	K7ER74;P02655;Q6P163	K7ER74	APOC4-APOC2;APOC2	-7.03	4.41e-06	0.698
HLISTHFAPGDFQGFALVNPQR	P98160	P98160	HSPG2	-4.89	4.43e-06	0.698
VMAVDALASSHPLSTPASEINTPAQISELFDAISYSK	P15144;H0YMC1	P15144	ANPEP	-4.66	4.47e-06	0.699
YLPDTLLLEECGLLR	P21964;E7EMS6	P21964	COMT	-6.54	4.47e-06	0.699
LAGEGATVAACDLDR	Q92506	Q92506	HSD17B8	-4.07	4.47e-06	0.699
TIIGSFNGALAAVPVQDLGSTVIK	Q9BWD1	Q9BWD1	ACAT2	-6.13	4.49e-06	0.699
VPLVAMHHAYVVTER	Q5SYU9;Q9UL12;Q5SYV1;Q9UL10	Q9UL12	SARDH	-5.84	4.5e-06	0.7
ACEFAGFQCQIQFGPHNEQK	Q9Y490	Q9Y490	TLN1	-4.58	4.5e-06	0.7
EIISFGSGYGGNSLLGK	H0YML5;H0YMA5;Q16822;H0YM31;P35558	Q16822	PCK2;PCK1	-4.53	4.51e-06	0.7
CGVEVTSMK	P33121;E7EPM6;B7Z3Z9;D6RER0	P33121	ACSL1	-6.6	4.54e-06	0.7
YPALTKPENQDIDWTLLEGETR	P13797;H7C4N2	P13797	PLS3	-5.49	4.54e-06	0.7
GYVSCALGCPYEGK	P35914	P35914	HMGCL	-5.78	4.55e-06	0.7
GLAVSDNGPCLGYR	Q9ULC5;A0A8C8L3F5;A0A8C8KCK5	Q9ULC5	ACSL5	-5.47	4.57e-06	0.701
LIEDTEDWRPR	Q96HC4;H0Y8Y3;H0YBI4	Q96HC4	PDLIM5	-6.04	4.57e-06	0.701
SQNGEFMTHK	E7EX44;E9PGZ1;Q05682	Q05682	CALD1	-5.42	4.59e-06	0.701
AAVSHWQQQSYLDSGIHSGATTTAPSLSGK	A0A2R8YCH5;A0A2R8Y5A3;P35222;A0A2R8Y543;A0A2R8Y804;A0A2R8Y750;A0A2R8Y7Z0;B4DGU4;A0A2R8Y5C3;A0A2R8Y5Z1;C9IZ65	A0A2R8YCH5	CTNNB1	-4.66	4.61e-06	0.702
ANCEPQTYGIGLK	Q16134;B4DEQ0;A0A804HL84;A0A804HL81;A0A804HJK8;A0A804HK05;A0A804HJT7;A0A804HI48;A0A804HI73;A0A804HI80;A0A804HI70	Q16134	ETFDH	-5.57	4.61e-06	0.702
IIHDFPQFYPLGIVQHD	P35244;B5MC59	P35244	RPA3	-5.16	4.61e-06	0.702
DNTTLLTQVQTTMR	A8K8J9;H0YI98;Q13561;A0A7I2V4H4;A0A7I2V4Y9	Q13561	DCTN2	-4.82	4.62e-06	0.702
EFNLQNMGLPDFHIPENLFLK	P04114	P04114	APOB	-5.66	4.63e-06	0.702
SQEEAAHTSGQPFHSTGAPGDAK	Q5T5P2;Q5T5P1;Q5T5P0	Q5T5P2	KIAA1217	-4.07	4.63e-06	0.702
ADMGGAATICSAIVSAAK	H0Y9Q1;P28838	P28838	LAP3	-4.69	4.63e-06	0.702
AGHQLQHDLFFDTLK	P23378	P23378	GLDC	-6.88	4.64e-06	0.702
TLILEGLEK	A3KMH1	A3KMH1	VWA8	-3.75	4.64e-06	0.702
SLEAYLNQHLSGFGAER	Q709F0;D6RDI8;F8WEV0	Q709F0	ACAD11	-5.33	4.65e-06	0.702
QFAPIHAEAPEFMEMSVEQEILVTGIK	P06576;H0YH81;F8W079	P06576	ATP5B	-7.58	4.65e-06	0.702
HIADLAGNSEVILPVPAFNVINGGSHAGNK	P06733;A0A2R8Y6G6;K7EM90;A0A2R8YEM5	P06733	ENO1	-7.75	4.67e-06	0.703
VLSGDLGQLPTGIR	Q16822;H0YM31	Q16822	PCK2	-4.74	4.67e-06	0.703
ALGISPFHEHAEVVFTANDSGPR	P02766;A0A087WT59	P02766	TTR	-5.47	4.69e-06	0.703
AVLVGYDEHFSFAK	Q96GD0	Q96GD0	PDXP	-4.51	4.71e-06	0.703
FLDGNELTLADCNLLPK	O00299	O00299	CLIC1	-4.35	4.73e-06	0.704
DILADVVQK	Q06278	Q06278	AOX1	-4.94	4.74e-06	0.704
IADFELPTIIVPEQTIEIPSIK	P04114	P04114	APOB	-4.74	4.74e-06	0.704
QVPICGDQPEAK	Q658P3;B8ZZX6	Q658P3	STEAP3	-4.91	4.75e-06	0.704
EPLFGISTGNLITGLAAGAK	P31327	P31327	CPS1	-6.23	4.76e-06	0.704
SVQGDHEMIHSASTK	Q9UNU6;C9JFR9	Q9UNU6	CYP8B1	-6.35	4.77e-06	0.704
YTEITATYFQGVR	P35573	P35573	AGL	-4.83	4.78e-06	0.705
VAGSAGMAALTQDIR	Q9UP52;E7ET36	Q9UP52	TFR2	-4.42	4.79e-06	0.705
WIQSVPIWER	Q06520	Q06520	SULT2A1	-6.58	4.8e-06	0.705
ITYVPAEHLEEFK	H0YGQ3;O75970	O75970	MPDZ	-4.52	4.88e-06	0.706
SSPAVEQQLLVSGPGK	A0A024R5I4;O94956;E9PRW4;A0A0A0MTF1	A0A024R5I4	SLCO2B1	-3.99	4.9e-06	0.707
FSHQGVQLIDFSPCER	P55884;C9JQN7	P55884	EIF3B	-4.9	4.91e-06	0.707
ILYSQCGDVMR	F8VPF3;G3V1V0;F8W1R7;B7Z6Z4;G8JLA2;P14649;F8W1I5;P60660;J3KND3	P14649	MYL6;MYL6B	-6.03	4.91e-06	0.707
LEQPDPGAVAAAAILR	Q3LXA3	Q3LXA3	DAK	-4.68	4.92e-06	0.707
LNSSSELAPITWK	P23378	P23378	GLDC	-5.74	4.93e-06	0.707
SGNSDVYENEIPGGQYTNLHFQAHSMGLGSK	P11498	P11498	PC	-6.88	4.94e-06	0.707
AAMFPETLDEGMQIPSTQFDAAHPTNVQR	A0A2R8YCH5;A0A2R8Y5A3;P35222;A0A2R8Y543;A0A2R8Y804;A0A2R8Y7Z0;B4DGU4;A0A2R8Y5Z1	A0A2R8YCH5	CTNNB1	-4.2	4.97e-06	0.708
EVLEGLEYLHK	O95747;C9JIG9	O95747	OXSR1	-4.95	4.97e-06	0.708
IAEEFEVELER	P11498	P11498	PC	-5.9	4.97e-06	0.708
EDMAALEK	Q9BQE3;F5H5D3;P68363;P68366;Q71U36	P68363	TUBA1C;TUBA1B;TUBA4A;TUBA1A	-6.92	4.97e-06	0.708
QEHCSQLESHLK	Q15075	Q15075	EEA1	-5.46	4.99e-06	0.708
SHIMPAEFSSCPLNSDEEVNK	A0A1W2PRB8;E9PJU8;Q9H0W9;A0A087WT99;E9PQS1;E9PPB5	A0A1W2PRB8	C11orf54	-4.79	5e-06	0.708
NCGQMSEIEAK	Q9Y490	Q9Y490	TLN1	-5.24	5.01e-06	0.708
CPNLTHLNLSGNK	P39687;H0YN26	P39687	ANP32A	-5.13	5.03e-06	0.709
QPFVQGLALYTPVVLPR	A0A7P0T8D1;P01019;A0A7P0TBH1;A0A7P0T9S6;A0A7P0TA52;A0A7P0TAP4;A0A7P0Z441	A0A7P0T8D1	AGT	-5.23	5.04e-06	0.709
MPDMHVNMPK	Q09666	Q09666	AHNAK	-3.71	5.04e-06	0.709
ELYSILQHK	P21695	P21695	GPD1	-5.16	5.04e-06	0.709
AMDSDWFAENYMGR	P55084;F5GZQ3;B5MD38	P55084	HADHB	-6.57	5.04e-06	0.709
MDERPIHAEPQYPVR	C9J126;P19022;A0A6Q8PHJ8;A0A6Q8PG20	C9J126	CDH2	-4.41	5.05e-06	0.709
QHCAYTIAK	Q6YN16	Q6YN16	HSDL2	-5.02	5.06e-06	0.709
FDGNKPDALGLNTR	P36537;O75310;Q9BY64	P36537	UGT2B10;UGT2B11;UGT2B28	-5.47	5.06e-06	0.709
DVQIGDIVTVGECRPLSK	P62280;M0R1H5	P62280	RPS11	-5.93	5.1e-06	0.71
ELQEGTYVMVAGPSFETVAECR	P00491	P00491	PNP	-4.38	5.11e-06	0.71
STSESFIQHIVSLVHHVK	E9PK91;A0A1W2PQ43;E9PQN2;E9PKI6;E9PK09;E9PJA7;Q9NYF8	Q9NYF8	BCLAF1	-4.52	5.12e-06	0.71
FWANFAR	P23141;A0A140TA63;H3BQV8	P23141	CES1	-8.07	5.13e-06	0.71
FNGGGHINHSIFWTNLSPNGGGEPK	F5H3C5;P04179;F5H4R2;F5GYZ5	P04179	SOD2	-6.63	5.13e-06	0.71
FTDCGHFQNTEFHELITVVK	O75884	O75884	RBBP9	-6.15	5.15e-06	0.711
NIITTELNSATDNPMVFANR	P42357	P42357	HAL	-5.07	5.19e-06	0.711
AAVEEGIVLGGGCALLR	P10809;A0A7I2V599;A0A7I2V2X6;A0A7I2YQK6	P10809	HSPD1	-5.88	5.19e-06	0.711
HSVNNPYSQFQDEYSLDEVMASK	P22307;E9PLD1	P22307	SCP2	-5.21	5.21e-06	0.711
WEDVNAAACDLAR	Q9H2M3;E5RH96	Q9H2M3	BHMT2	-6.57	5.23e-06	0.712
KDEDLFR	O75531	O75531	BANF1	-4.85	5.24e-06	0.712
YAEIYGISSAHTLLR	Q9UDR5;F8WAH1;A0A7P0TAY5;A0A7P0TA62;A0A7P0TA09;A0A7P0T8W7;A0A7P0TBD2	Q9UDR5	AASS	-5.11	5.27e-06	0.712
IHTIVISVQHNEDITLEEMR	Q00266	Q00266	MAT1A	-6.65	5.27e-06	0.712
LGIHSALLDEK	Q86SX6	Q86SX6	GLRX5	-4.96	5.28e-06	0.713
LNHVAIAVPDLEK	Q96PE7;H7BZS7	Q96PE7	MCEE	-5.12	5.28e-06	0.713
GTEVYPMLGSVLR	P11509	P11509	CYP2A6	-6.61	5.29e-06	0.713
EHGAFDAVK	A0A494C1T2;P11586;V9GYY3;F5H2F4;V9GZ78	P11586	MTHFD1	-6.35	5.29e-06	0.713
VVAEGFDFANGINISPDGK	P27169	P27169	PON1	-4.61	5.31e-06	0.713
LHPAPEATVAATCAFPSVQAAVDSTVHILQAAVPVAR	Q86WU2	Q86WU2	LDHD	-6.99	5.33e-06	0.713
MPHQLFIGGEFVDAEGAK	O75891	O75891	ALDH1L1	-7.57	5.34e-06	0.713
ALLVWTGPGAGSVTFGELDAR	Q9Y2P5	Q9Y2P5	SLC27A5	-5.94	5.34e-06	0.713
LGQENLEDK	P47989	P47989	XDH	-5.39	5.34e-06	0.713
VWPNPEVFDPFR	Q02928;A0A0C4DFV7;V9GZ77	Q02928	CYP4A11	-5.79	5.35e-06	0.714
LLQYSDALEHLLTTGQGVVLER	O95299;E7ESZ7;A0A087WXC5;A0A7I2V594;A0A7I2YQU0;A0A7I2V2X3;A0A7I2V4N8;H7C2X4;H7C1Y7;A0A7I2V5U7;A0A7I2V419;A0A7I2V458;A0A7I2V2W9;A0A7I2V327;A0A7I2V438;A0A7I2V5L0;A0A7I2V3H5;A0A7I2V2F6;C9J6X0;Q8N1B9;A0A7I2V3D4;A0A7I2V2I6;A0A7I2V5B2;A0A7I2V2N6	O95299	NDUFA10	-5.06	5.35e-06	0.714
NAAENGAIQNLIK	P11226	P11226	MBL2	-4.71	5.4e-06	0.714
LQVEHTVTEEITDVDLVHAQIHVAEGR	P11498;A0A494C016;A0A494C101;A0A494C0T2;E9PRE7	P11498	PC	-6.22	5.41e-06	0.715
ALQPIVSEEEWAHTK	A0A7P0TAR1;P43155;A0A7P0T9R9;A0A7P0T9E7;A0A7P0TBF3;A0A7P0TAQ4;B7ZBP5;A6PVN3	A0A7P0TAR1	CRAT	-5.83	5.43e-06	0.715
NSLLNGSWGSEEK	P56470;M0QZ93	P56470	LGALS4	-5.59	5.44e-06	0.715
GIPALIENDHHMNSIR	P35573	P35573	AGL	-5.91	5.47e-06	0.715
HILLAVANDEELNQLLK	A0A7I2V423;A0A7I2YQR8;A0A7I2V6E9;A0A7I2V2N7;A0A7I2V3R0;Q9P0M6;A0A7I2V412;A0A7I2YQD6;A0A8I5KS04;O75367;A0A8I5KRC6;D6RCF2	O75367	H2AFY2;H2AFY	-4.58	5.47e-06	0.715
DHSGGIGDICK	Q53H82	Q53H82	LACTB2	-5.46	5.49e-06	0.716
GAVHQLCQSLAGK	P09417	P09417	QDPR	-7.03	5.49e-06	0.716
MHDYDGNNLLDGLELSTAITHVHK	Q8NI22;H7BZ18;A0A3B3IU18	Q8NI22	MCFD2	-6.3	5.5e-06	0.716
LVLPGGIDTHTHMQFPFMGSR	Q14117;E5RG28	Q14117	DPYS	-7.35	5.52e-06	0.716
AALVDQSGVLLAFADQPIK	Q96C11;F2Z2V1;A0A0U1RRB9;C9J015;A0A0U1RQS3;A0A0U1RR53;J3QKV9	Q96C11	FGGY	-4.85	5.52e-06	0.716
AFITHGGANGIYEAIYHGIPMVGIPLFADQPDNIAHMK	P16662	P16662	UGT2B7	-7.61	5.57e-06	0.717
GFFDPNTEENLTYLQLK	P15924	P15924	DSP	-3.9	5.63e-06	0.718
LPEAIEEVK	Q9UBQ7;U3KQ56	Q9UBQ7	GRHPR	-5.01	5.64e-06	0.718
GNEFLFSHLWPLIEK	Q2TAA2;H7C5G1	Q2TAA2	IAH1	-4.53	5.64e-06	0.718
SPSPFHAVAECR	C9JBE1;E5RJ35;Q9ULA0;E5RIA4;E7ETB3;F8WAN0;B9ZVU2;E7EPX3	Q9ULA0	DNPEP	-4.6	5.65e-06	0.718
LLDIACWIHHK	A0A1B0GU92;A0A1B0GU03;F8WD96;A0A1B0GWE8;P07339;A0A1B0GW44;A0A1B0GVD5;F8W787;A0A1B0GV23;C9JH19;A0A1B0GVP3	A0A1B0GWE8	CTSD	-7.87	5.66e-06	0.718
SVPPSASHVAPTETFTYEWTVPK	E9PFZ2;P00450	P00450	CP	-5.35	5.7e-06	0.719
SPPILPPHLLQVILNK	O43741	O43741	PRKAB2	-5.16	5.7e-06	0.719
YPALHKPENQDIDWGALEGETR	P13796	P13796	LCP1	-4.88	5.72e-06	0.719
FDGNKPDTLGLNTR	P06133;A0A1W2PQJ2;P16662;E9PBP8;D6RH08	P16662	UGT2B4;UGT2B7	-5.37	5.72e-06	0.719
VELLSGEILPILQK	Q99424;C9J0G0	Q99424	ACOX2	-5.58	5.73e-06	0.719
IYNLGTGTGYSVLQMVQAMEK	Q14376	Q14376	GALE	-5.51	5.73e-06	0.719
TVFFWAPIMK	Q5R3B4;O95563	Q5R3B4	MPC2	-5.52	5.73e-06	0.719
VPGAWTEACEQK	O75891	O75891	ALDH1L1	-5.92	5.83e-06	0.72
TPDFESTGLYSAMPR	A0A6Q8PHC6;P50440;A0A6Q8PGA2;A0A6Q8PFC6;H0YMX4	A0A6Q8PHC6	GATM	-5.08	5.83e-06	0.72
QDTFALASQQK	P09110;C9JDE9;H7C131;H0Y4D4	P09110	ACAA1	-3.97	5.85e-06	0.721
LAGATYMEIHQAGGGIHFTVER	Q96NU7	Q96NU7	AMDHD1	-5.8	5.88e-06	0.721
VNGEVVQSGNTNQMVFK	Q96GK7	Q96GK7	FAHD2A	-4.46	5.88e-06	0.721
SSRPEFDWQDPLVLEEQLTTDEILIR	Q92947;K7ES74;K7EKH1;K7ERX1	Q92947	GCDH	-5.62	5.92e-06	0.721
QQPTQFINPETPGYVGFANLPNQVHR	Q15019;C9JB25;C9J938;C9IZU3;C9JZI2;A0A1B0GXJ2;C9JFT1;F8WB65;C9JT15;C9JSE7	Q15019	37500	-5.64	5.93e-06	0.722
NICQFLVEIGLAK	P41567;K7EM18	P41567	EIF1	-5.2	5.95e-06	0.722
TLQALEFHTVPFQLLAR	Q08380	Q08380	LGALS3BP	-4.45	5.95e-06	0.722
VDINAPDVGVQGPDWHLK	Q09666	Q09666	AHNAK	-5.89	5.97e-06	0.722
CFIEEIPDETMVIGNYR	Q9BVK6;Q7Z7H5;F8W7F7	Q9BVK6	TMED9;TMED4	-5.04	5.98e-06	0.722
SITIIGGGFLGSELACALGR	O95831;A0A6Q8PG15;A0A6Q8PFM5;A0A7I2PK44;A0A6Q8PFE1;A0A6Q8PHJ9;A0A6Q8PHC0;A0A6Q8PFQ8;A0A6Q8PFS4;A0A6Q8PFA7;A0A7I2RLJ8;A0A6Q8PFW2	O95831	AIFM1	-5.23	6.01e-06	0.723
MLLDPMGGIVMTNDGNAILR	P49368;B4DUR8;E9PRC8;Q5SZX6;Q5SZX9	P49368	CCT3	-4.58	6.02e-06	0.723
SGYIPSGHSLGTPEPAPR	A0A804HI61;A0A2R8Y4T1;E9PGF5;A0A494C067;E9PF55;Q9HBL0	A0A804HI61	TNS1	-5.01	6.03e-06	0.723
EIISEMGELGVLGPTIK	Q92947;K7EKT3;K7ES74	Q92947	GCDH	-6.17	6.04e-06	0.723
TGWHATEQYLIEPEK	Q9UI17	Q9UI17	DMGDH	-5.95	6.05e-06	0.723
IIHESGAQILR	A6ND91;M0QYD4	A6ND91	ASPDH	-5.43	6.06e-06	0.723
SDQLQQAVQSQGFINYCQK	D6REX3;O94979;D6RHZ5;H7BXG7;H0Y8V7;H0YAB3	D6REX3	SEC31A	-4.06	6.06e-06	0.723
HLSLLTTLSNR	D6RF35;P02774;D6RBJ7	D6RF35	GC	-5.42	6.07e-06	0.723
LLVVYPWTQR	P69891;A0A2R8Y7X9;CON__P02070;CON__Q3SX09;E9PEW8;F8W6P5;P02042;E9PFT6;P02100;P68871;A0A2R8Y7R2;P69892	P68871	HBG1;HBD;HBB;HBE1;HBG2	-7.5	6.07e-06	0.723
LDPTFASATLLFQK	P47989	P47989	XDH	-5.22	6.07e-06	0.723
SVHPYEVAEVIALPVEQGNFPYLQWVR	O60888	O60888	CUTA	-5.46	6.09e-06	0.724
TSFYEEYGVIR	O95479	O95479	H6PD	-4.45	6.09e-06	0.724
VGSVLQEGCGK	P31040	P31040	SDHA	-4.87	6.09e-06	0.724
HAAGVLAQEDLVGLLEPINTR	F6UJY1;Q5T013;J9JIE9;E7EWH8;A0A0A0MTR5;F6UJY9;H0YB70;H0YB18	F6UJY1	HYI	-4.9	6.1e-06	0.724
IMGLDLPDGGHLTHGFMTDK	P34896;J3KRZ5	P34896	SHMT1	-6.58	6.1e-06	0.724
GTDIMYTGTLDCWR	P05141	P05141	SLC25A5	-5.97	6.1e-06	0.724
HTAMVSWGGVSIPNSPFR	P21333;A0A7P0NMY4;Q60FE5	P21333	FLNA	-5.08	6.12e-06	0.724
DNDLISLPK	Q15404	Q15404	RSU1	-3.6	6.16e-06	0.725
MLIAQEGLLCGGSAGSTVAVAVK	P35520	P35520	CBS	-5.26	6.18e-06	0.725
FALDGFFSSIR	P28845;A0A0A0MQV1	P28845	HSD11B1	-7.37	6.18e-06	0.725
SHGVLGLYR	P53007	P53007	SLC25A1	-6.17	6.18e-06	0.725
HPAVVETAVISSPDPVR	Q68CK6;H3BTX9	Q68CK6	ACSM2B	-6.18	6.2e-06	0.725
VVNDDFSEVADVLVEDGVVR	Q14117;E5RG28	Q14117	DPYS	-6.04	6.23e-06	0.725
SGFPQVSMFFTHTFPK	P04196	P04196	HRG	-5.47	6.23e-06	0.725
MDAPTSAAVTR	O95154;Q8NHP1	O95154	AKR7A3;AKR7L	-4.03	6.24e-06	0.726
MSGGWELELNGTEAK	I3L3Q7;I3L3B0;Q07021	Q07021	C1QBP	-5.37	6.27e-06	0.726
GITLHPELFSIDNGLLTPTMK	P33121;E7EPM6;B7Z3Z9;H0Y9U7	P33121	ACSL1	-7.85	6.28e-06	0.726
ENVQDVLPALPNPDDYFLLR	O76054;F8WEE7;C9JTM4	O76054	SEC14L2	-5.63	6.32e-06	0.726
HPAVVETAVISSPDPVRGEVVK	Q68CK6;H3BTX9	Q68CK6	ACSM2B	-6.92	6.34e-06	0.727
VLTLSDDLER	P55010	P55010	EIF5	-5.25	6.35e-06	0.727
EPLWIRPDAPSR	P35520;C9JMA6	P35520	CBS	-5.75	6.37e-06	0.727
FADGDLDAVLSR	O75891	O75891	ALDH1L1	-4.18	6.38e-06	0.727
VVSIGVPVSELLDDPSGPAGSLTSVEFCGGTHLR	P49588;A0A6Q8PGN5;A0A6Q8PFY2;A0A6Q8PF33;A0A6Q8PGE8;H3BPK7;A0A6Q8PGR9;A0A6Q8PGB5;A0A6Q8PFK3	P49588	AARS	-4.88	6.4e-06	0.727
LETELDGLR	P46952;C9IY88	P46952	HAAO	-5.44	6.41e-06	0.728
GTFCSFDTPDDSIR	H3BRN4;P80404;H3BNQ7	H3BRN4	ABAT	-4.62	6.43e-06	0.728
HVTVIGGGLMGAGIAQVAAATGHTVVLVDQTEDILAK	Q16836;E9PF18;A0A0A0MSE2;A0A804HLB5;A0A1W2PQV5;A0A804HJW7;A0A1W2PP40	Q16836	HADH	-7.66	6.46e-06	0.728
TDVAAPFGGFK	O75891	O75891	ALDH1L1	-5.34	6.49e-06	0.728
SLDGIPFTVDAGGLIHCIEDFHK	Q93052;A0A087WZF1	Q93052	LPP	-4.82	6.49e-06	0.728
GASIAHCPNSNLSLSSGFLNVLEVLK	Q5SZC6;Q9Y2T3;H0YDZ7;Q5SZC5;Q5SZC3	Q9Y2T3	GDA	-5.35	6.5e-06	0.729
NHGVVMPDANKENTLNQLVGAAFGAAGQR	Q02252;G3V4Z4	Q02252	ALDH6A1	-8.41	6.51e-06	0.729
NLQLDYVDLYLIHFPVSVKPGEEVIPK	P52895;S4R3P0;Q04828;H0Y804;A6NHU4	Q04828	AKR1C2;AKR1C1	-8.58	6.52e-06	0.729
YILSDSSPAPEFPLAYLTSENR	P23786;A0A1B0GVF3;A0A1B0GTB8;A0A1B0GWC0;A0A1B0GV75	P23786	CPT2	-5.08	6.52e-06	0.729
LSVGLEDEEDLLEDLDQALK	P32929	P32929	CTH	-5.64	6.53e-06	0.729
LLEPEAPGLCRPPLPR	A8MQ02;H0Y8L4;H0Y948;H0Y8U8;J3KN01;A0A804HJ20;P55196	J3KN01	MLLT4	-4.48	6.55e-06	0.729
QSGDVYYNTGDVLAMDR	Q9Y2P5	Q9Y2P5	SLC27A5	-5.75	6.55e-06	0.729
ECPGIEPVCVDLGDWEATER	J3KS22;Q7Z4W1;J3QS36	Q7Z4W1	DCXR	-7.55	6.59e-06	0.73
CLLLVDSVASLGGTPLYMDR	P21549	P21549	AGXT	-6.75	6.67e-06	0.731
VIFDTVDLSATWEVMEK	P17516	P17516	AKR1C4	-5.54	6.67e-06	0.73
GHYTEGAELVDSVLDVVR	A0A0B4J269;Q13509;Q5JP53;P07437;Q5ST81;P68371;Q13885;Q9BVA1;G3V2A3	P68371	TUBB3;TUBB;TUBB4B;TUBB2A;TUBB2B	-3.66	6.67e-06	0.73
GDECELLGHSK	P49411	P49411	TUFM	-4.64	6.67e-06	0.73
WLPLEANPEVTNQFLK	P15374	P15374	UCHL3	-5.36	6.67e-06	0.73
TICAILENYQTEK	P49591;Q5T5C7	P49591	SARS	-5.25	6.69e-06	0.731
MPHEELPSLQRPR	Q13576	Q13576	IQGAP2	-4.09	6.72e-06	0.731
GMSQLITMACGSCSNENALK	H3BRN4;P80404;H3BNQ7	H3BRN4	ABAT	-6.8	6.73e-06	0.731
DSEHGDVLWNTAVVISNSGAVLGK	Q9UBR1	Q9UBR1	UPB1	-6.47	6.74e-06	0.731
SVDYPCLLR	P31327;A0A669KBF2	P31327	CPS1	-7.44	6.75e-06	0.731
GAGAYICGEETALIESIEGK	G3V0I5;P49821;B4DE93;H0YE81;E9PLC6	G3V0I5	NDUFV1	-4.96	6.78e-06	0.732
ILEFLYSTSYNMDR	P28845	P28845	HSD11B1	-5.81	6.8e-06	0.732
SGDWMIDYVSNR	P35573	P35573	AGL	-5.95	6.84e-06	0.732
GHGLICEGQPVTSR	A0A0U1RRI8;Q96C11;F2Z2V1;A0A0U1RRB9;A0A0U1RQJ1	Q96C11	FGGY	-5.29	6.84e-06	0.732
HLGFQSAEEALR	C9JDL1;P50053	P50053	KHK	-6.71	6.84e-06	0.732
AEMWLIR	A0A0G2JMZ5;A0A804HJ67;O75795;P54855	O75795	UGT2B17;UGT2B15	-4.84	6.85e-06	0.732
DYAVSTVPVADGLHLK	O94760;B4DYP1	O94760	DDAH1	-5.44	6.86e-06	0.733
LSSWVLLMK	A0A024R6I7;A0A0G2JRN3;P01009	P01009	SERPINA1	-6.01	6.89e-06	0.733
TMGCLATTHSK	H3BRN4;P80404;H3BNQ7	H3BRN4	ABAT	-6.06	6.91e-06	0.733
EINGIHDESNAFESK	E9PMS6;H0YDQ3;H0YDG6;H0YE95;E9PMT2;A0A0A0MTE2;H0Y424;F8WD26;J3KP06;Q8WWI1	E9PMS6	LMO7	-4.09	6.93e-06	0.733
NSFGLAPAAPLQVHAPLSPNQTVEISLPLSTVGSVMK	Q10567	Q10567	AP1B1	-4.74	6.94e-06	0.733
FHPEPYGLEDDQR	A0A669KB05;A0A669KB62;C9JZR2;H0YC95;O60716	C9JZR2	CTNND1	-5.13	6.94e-06	0.733
VIPSQEHLNGPLPVPFTNGEIQK	O14745	O14745	SLC9A3R1	-5.19	6.94e-06	0.733
VDFTEEEISNMR	Q13576;F5H7S7;D6R939	Q13576	IQGAP2	-5.18	6.98e-06	0.734
NYCGLPGEYWLGNDK	P02675;D6REL8	P02675	FGB	-5.37	7.04e-06	0.734
EGIQYVFQTR	P21549	P21549	AGXT	-4.74	7.05e-06	0.735
GELLGCFGLTEPNSGSDPSSMETR	Q92947	Q92947	GCDH	-5.71	7.07e-06	0.735
EDLIWELLNQAQEHFGK	P02787	P02787	TF	-6.68	7.1e-06	0.735
WSSLACNIALDAVK	P49368;B4DUR8;E9PRC8;Q5SZX6;E9PQ35;Q5SZW8	P49368	CCT3	-5.26	7.11e-06	0.735
VEAPSLDVHMDSPDINIEGPDVK	Q09666	Q09666	AHNAK	-5.52	7.13e-06	0.735
ILGYINTGK	P05091;S4R3S4	P05091	ALDH2	-7.02	7.14e-06	0.735
LTTDPDLILEVLR	Q71RC2;Q96J85;F8VY40;F8W1I4	Q71RC2	LARP4	-4.63	7.15e-06	0.736
EEECHFYAGGQVYPGEASR	Q13162;A6NG45	Q13162	PRDX4	-4.92	7.17e-06	0.736
VVYEAGVFSVTAGDGK	Q14117	Q14117	DPYS	-5.04	7.21e-06	0.736
LWEFFQVDVNK	P35573	P35573	AGL	-5.16	7.22e-06	0.736
YQEAAPNVANNTGPHAASCFGAK	A0A669KB05;A0A804HK15;A0A804HIL4;A0A804HJM1;A0A669KB62;C9JZR2;H0YC95;O60716	C9JZR2	CTNND1	-4.86	7.26e-06	0.737
AIGPHDVLATLLNNLK	O75533;H7C341	O75533	SF3B1	-4.47	7.28e-06	0.737
LVEALCAEHQINLIK	P25398	P25398	RPS12	-5.52	7.29e-06	0.737
NVNIQNFHISWK	A0A804HII9;A0A804HK61;A0A7I2V4Y4;A0A804HLF4;A0A804HJQ9;G3V2N5;A0A804HIN7;A0A804HL31;G3V2W4;A0A804HJN7;G3V2X9;P12814	A0A804HII9	ACTN1	-5.77	7.3e-06	0.737
LICINDYEQHAK	Q9UJM8	Q9UJM8	HAO1	-6.4	7.32e-06	0.737
TAIEAMAAVFGGTQSLHTNSFDEALGLPTVK	P22033	P22033	MUT	-5.78	7.33e-06	0.737
GHQQLYWSHPR	P62273;A0A2R8Y851	P62273	RPS29	-5.79	7.33e-06	0.737
VCSQYAAYGEK	D6RF35;P02774;D6RBJ7	D6RF35	GC	-5.05	7.35e-06	0.738
HIGDGCCLTR	Q6UX53	Q6UX53	METTL7B	-5.54	7.35e-06	0.738
HFVGYPTNSDFELK	Q14914;F2Z3J9;Q5JVP2;F6XGT7	Q14914	PTGR1	-6.5	7.35e-06	0.738
CVVALATDPNILSLSGK	Q96LJ7	Q96LJ7	DHRS1	-5.37	7.37e-06	0.738
DERPHFYTLYLEEPDSSGHSYGPVSSEVIK	P22413	P22413	ENPP1	-4.74	7.38e-06	0.738
IVGDLAQFMVQNGLSR	P11498	P11498	PC	-4.79	7.38e-06	0.738
NLQNLLILTAIK	A0A087WVQ6;Q00610;P53675;A0A087WX41	A0A087WVQ6	CLTC;CLTCL1	-4.47	7.39e-06	0.738
YMLAIVQDILR	E9PBP6;P55157	P55157	MTTP	-5.69	7.4e-06	0.738
CLTTDEYDGHSTYPSHQYQ	P30043;A0A2R8YEP4;M0R192	P30043	BLVRB	-6.6	7.43e-06	0.738
TCNVLVALEQQSPDIAQCVHLDR	Q00266;B1ANE6	Q00266	MAT1A	-6.56	7.46e-06	0.739
LVNACLAEELPHIHAFEQK	Q9H3K6;A0A499FJE1	Q9H3K6	BOLA2	-4.64	7.47e-06	0.739
LTEIINTQHENVK	P21695	P21695	GPD1	-5.99	7.52e-06	0.739
TGIAGGLWDVLK	P22897	P22897	MRC1	-4.24	7.55e-06	0.74
MFLSFPTTKTYFPHFDLSHGSAQVK	P69905;A0A2R8Y7C0;CON__P01966;G3V1N2	P69905	HBA1;HBA2	-6.4	7.56e-06	0.74
DMYQIMDEIK	P21549	P21549	AGXT	-6.39	7.57e-06	0.74
GHVDILAPTVQELAALEK	A0A7I2V430;A0A7I2V4F0;Q92499;A0A7I2V2M5;A0A087WZ71;A0A7I2YQ77;A0A087X2G1	A0A7I2V430	DDX1	-5.76	7.59e-06	0.74
SHEGETSYIR	Q13242	Q13242	SRSF9	-4.13	7.64e-06	0.74
VLALSVETDYTFPLAEK	P05388;F8VWS0;F8VW21;F8W1K8;F8VZS0	P05388	RPLP0	-4.16	7.66e-06	0.741
TIADLELHYQEFIR	P15924	P15924	DSP	-4.38	7.7e-06	0.741
AHSLLPVDDAINGLSEEQR	A0A0A0MT83;P26440;A0A0S2Z4K7;A0A087WVD3	A0A0A0MT83	IVD	-4.72	7.7e-06	0.741
TPALIVYGDQDPMGQTSFEHLK	F8W9U3;Q96IU4	Q96IU4	ABHD14B	-4.97	7.72e-06	0.741
GFDVFNALDLMENK	A0A7I2V539;P30419;O60551;Q5VUC6	A0A7I2V539	NMT1;NMT2	-3.48	7.72e-06	0.741
EIPSHVLSK	E5RHG8;Q15369;A0A8I5KYG1	E5RHG8	TCEB1	-5.13	7.72e-06	0.741
TAIHTAAMDMLGGPGIESQCR	Q6YN16	Q6YN16	HSDL2	-5.39	7.73e-06	0.741
DQDGYYWITGR	Q9NR19	Q9NR19	ACSS2	-4.84	7.74e-06	0.741
DDEFTHLYTLIVRPDNTYEVK	P27797;K7EJB9;K7EL50;A0A7P0T861	P27797	CALR	-8	7.75e-06	0.741
EAEFGQGTGPIWLNEVK	F5GZZ9;C9JHR8;Q86VB7;H0YGZ7	Q86VB7	CD163	-4.4	7.75e-06	0.741
VNQAIWLLCTGAR	M0R0F0;P46782;M0R0R2;M0QZN2	M0R0F0	RPS5	-4.94	7.75e-06	0.741
CLSSATDPQTK	D6REX3;O94979;H7BXG7;H0Y8W8	D6REX3	SEC31A	-4.27	7.75e-06	0.741
MELQEIQLK	A0A087WWU8;A0A2R2Y2Q3;A0A494C0P6;J3KN67;P06753	J3KN67	TPM3	-7.8	7.8e-06	0.742
LQIQGLQESLGEGIR	A0A8I5KR82;Q969I3;A0A8I5KVG3;E9PP99	Q969I3	GLYATL1	-5.58	7.81e-06	0.742
YGFLLLMK	P11509;P20853;F8W816;Q16696	P11509	CYP2A6;CYP2A7;CYP2A13	-6.08	7.82e-06	0.742
EVTVDTTLAGYHLPK	P51589;A0A3B3IT99	P51589	CYP2J2	-4.37	7.82e-06	0.742
QVFGQTTIHQHIPFNWDSEFVQLHFGK	Q9UJS0	Q9UJS0	SLC25A13	-5.45	7.82e-06	0.742
LGWVRPDLGELSK	P51970	P51970	NDUFA8	-4.48	7.84e-06	0.742
IAQNDHDLGDMSTVADPSVISHLFSHR	Q9NR19	Q9NR19	ACSS2	-5.46	7.85e-06	0.742
DALLSALSIQNYHLECNETK	A0A087WUZ3;Q01082	Q01082	SPTBN1	-5.27	7.89e-06	0.743
MATAEVLNIGK	P22234;E9PBS1	P22234	PAICS	-6.85	7.9e-06	0.743
SPEEGAETPVYLALLPPDAEGPHGQFVSEK	P16152	P16152	CBR1	-4.91	7.93e-06	0.743
DLVPDLSNFYAQYK	A0A087WXX8;P21912;A0A087WWT1	P21912	SDHB	-4.83	7.93e-06	0.743
AWALDVAELHR	P24298	P24298	GPT	-6.79	7.94e-06	0.743
IDFSSIAVPGTSSPR	Q5TDH0	Q5TDH0	DDI2	-4.42	7.96e-06	0.743
TYFSCTSAHTSTGDGTAMITR	P31040;D6RFM5;A0A494C1T6	P31040	SDHA	-5.65	7.96e-06	0.743
VNAEGSVDSVFSQVCTHLDALK	Q5T9B7;P00568	Q5T9B7	AK1	-5.05	7.97e-06	0.743
NSCISEEERDAYEELLTQAEIQGNINK	Q13576;F5H7S7;D6R939	Q13576	IQGAP2	-5.59	7.97e-06	0.743
SSESEFTQYTTHHILK	E9PHV5;P28290;E7EUL7	E9PHV5	SSFA2	-3.73	7.98e-06	0.744
MITSAAGIISLLDEDEPQLK	Q99460;A0A087WW66;A0A7I2V5C8;A0A7I2V262;A0A7I2YQY1;A0A7I2V523;A0A7I2V479;A0A7I2V2K8;A0A7P0MW50;A0A7I2V4X0;A0A7I2YQI9;A0A7I2V491;A0A7I2V4A5;C9J9M4;F8WCE3	Q99460	PSMD1	-4.62	7.99e-06	0.744
QQTEWQSGQR	P02649;H0Y7L5;E9PEV4;E7ERP7	P02649	APOE	-4.02	8.02e-06	0.744
SGSMDPSGAHPSVR	Q07666	Q07666	KHDRBS1	-5.87	8.03e-06	0.744
VVSVLTVVHQDWLNGK	P01859;A0A286YEY4;sp|A007999|abysis_7999;sp|A016205|abysis_16205;sp|A008622|abysis_8622;sp|A024235|abysis_24235;sp|A024281|abysis_24281;sp|A024333|abysis_24333;sp|A024335|abysis_24335;sp|A024343|abysis_24343;sp|A081285|abysis_81285;sp|A024283|abysis_24283;sp|A035831|abysis_35831	sp|A008622|abysis_8622	IGHG2	-5.57	8.05e-06	0.744
NFYELSPHIFALSDEAYR	E9PDF6;O43795;E7EQD9;C9JYW1;C9JUP5	E9PDF6	MYO1B	-5.19	8.05e-06	0.744
LGEIVTTIPTIGFNVETVEYK	P84085;C9J1Z8;F5H423;F5H0C7;P61204;P84077;P18085;C9JPM4	P84077	ARF5;ARF3;ARF1;ARF4	-5.1	8.07e-06	0.744
ISLNSLCYGDMDK	O75131;A0A087WYQ3;H0YB26	O75131	CPNE3	-3.63	8.09e-06	0.744
DIASGLIGPLIICK	E9PFZ2;P00450	P00450	CP	-5.14	8.11e-06	0.745
VATQAVEDVLNIAK	B7Z8V7;Q4G0N4;A0A0C4DGV3	Q4G0N4	NADK2	-3.9	8.11e-06	0.745
HEEQPAPGYDTHGR	A0A087X0K9;Q07157;G3V1L9;A0A0G2JNH2;A0A7I2V5U5;G5E9E7	A0A087X0K9	TJP1	-5.28	8.16e-06	0.745
HSMNPFCEIAVEEAVR	P38117;M0QY67	P38117	ETFB	-5.58	8.17e-06	0.745
GLGIISSNGK	P10632;B7Z1F5;G3V188	P10632	CYP2C8	-5.63	8.18e-06	0.745
DLGEAALNEYLR	O75891	O75891	ALDH1L1	-4.35	8.26e-06	0.746
LTQAQIFDYGEIPNFPR	P00491;G3V5M2;G3V2H3	P00491	PNP	-5.1	8.26e-06	0.746
NDEYENLFNMIVEIPR	Q9H2U2;D6RGV9;D6RAD3;D6RGI1	Q9H2U2	PPA2	-4.21	8.27e-06	0.746
LGEVTGSPSPPPR	H7BXR3;H7BZX1	H7BXR3	SORBS2	-4.75	8.27e-06	0.746
AGTNALLMLENFIDGK	Q9H2A2	Q9H2A2	ALDH8A1	-5.64	8.32e-06	0.746
QYEQQTYQVIPEVIK	Q9Y262;B0QY89;C9K0Q7;H7C3A0;C9JHP4	Q9Y262	EIF3L	-4.69	8.32e-06	0.746
FGCQVAGK	P50053	P50053	KHK	-5.69	8.34e-06	0.747
ETVTPGPNFQER	Q9NP74;S4R313	Q9NP74	PALMD	-4.51	8.4e-06	0.747
HFIPADYLESTEEFIR	Q9BX66;Q5T925;A0A0U1RQI5	Q9BX66	SORBS1	-4.29	8.4e-06	0.747
ACDFLLSR	P48449;A0A0G2JQD0	P48449	LSS	-4.54	8.41e-06	0.747
ACGDSTLTQITAGLDPVGR	C9JIS1;C9JZN1;P62879;C9JXA5	P62879	GNB2	-5.14	8.42e-06	0.747
GSGGLFSPSTAHVPDGALGQR	Q9C0C2	Q9C0C2	TNKS1BP1	-4.58	8.42e-06	0.747
VVEIAPAAHLDPQLR	P11498;A0A494C016;A0A494C101;A0A494C0T2;E9PRE7	P11498	PC	-4.73	8.45e-06	0.747
QILVGDIGDTVEDPYTSFVK	Q9Y281	Q9Y281	CFL2	-4.24	8.47e-06	0.748
QDIENILHWNVTQHK	P21399	P21399	ACO1	-5.18	8.5e-06	0.748
KVPDPVLEESFQQLQR	O60437;K7EKI8;K7EQ71	O60437	PPL	-4.02	8.5e-06	0.748
NVCTEAGMFAIR	A0A087X2I1;P62333	A0A087X2I1	PSMC6	-4.24	8.52e-06	0.748
GSDGAASSYQLK	A0A7P0Z4C3;Q14203;Q6AWB1;E7EX90;A0A804CDA6	E7EX90	DCTN1;DKFZp686E0752	-4.56	8.54e-06	0.748
IPNGVNGVEDR	Q14117	Q14117	DPYS	-5.54	8.54e-06	0.748
QVIHPNQIAVVQEQFSPSPEK	Q8N0X4;Q5JVC0	Q8N0X4	CLYBL	-5.23	8.55e-06	0.748
NTYIFPPEPSMK	P22033	P22033	MUT	-4.56	8.55e-06	0.748
DNNMAPYYEALCK	Q15008	Q15008	PSMD6	-4.21	8.56e-06	0.748
VASGCLDINSSVK	E9PDR0;P05166;E7EX59;E7ETT1;E7ETT4;E7EUY3;E9PEC3;F8WBI9	E9PDR0	PCCB	-5.13	8.57e-06	0.748
SYCNDQSTGDIK	P00492	P00492	HPRT1	-4.61	8.58e-06	0.749
GFCSANGITVSADQK	Q15166;F8WD41;C9JZ99	Q15166	PON3	-4.48	8.58e-06	0.749
IYGQACATYESASLR	A0A7P0TAR1;P43155;A0A7P0T9R9;A0A7P0T9E7;H0Y4Z7	A0A7P0TAR1	CRAT	-3.91	8.61e-06	0.749
HTFMGVVSLGSPSGEVSHPR	P02765;C9JV77	P02765	AHSG	-5.54	8.64e-06	0.749
ENTLNQLVGAAFGAAGQR	Q02252;G3V4Z4	Q02252	ALDH6A1	-5.91	8.65e-06	0.749
VVIEACDELGIILAHTNLR	P31939	P31939	ATIC	-3.96	8.65e-06	0.749
FLNEHPGGEEVLLEQAGVDASESFEDVGHSSDAR	O43169;D6RFH4;A0A8I5QKN7;A0A8I5KSY3;A0A8I5KYK4;A0A8I5KSY8;H3BUX2;A0A8I5KP74	O43169	CYB5B	-5.91	8.66e-06	0.749
LSAASTWLEDEGVGATTVMLK	A0A494C039;Q9Y4L1;A0A087X054	Q9Y4L1	HYOU1	-4.99	8.73e-06	0.75
TFESLVDFSK	A0A0D9SFP2;A0A1W2PNM1;A0A804HKJ2;A0A1W2PQ78;A0A1W2PRT2;Q16836;E9PF18;A0A0A0MSE2;A0A804HLB5;A0A1W2PQV5;A0A804HJW7;A0A1W2PQC2	Q16836	HADH	-5.1	8.74e-06	0.75
TGLLSGLDIMEVNPSLGK	P05089;A0A5F9ZH78;A0A5F9ZGN6	P05089	ARG1	-6.83	8.8e-06	0.75
EQQHLLASADTGR	O15020;A0A087WYQ1	O15020	SPTBN2	-4.26	8.86e-06	0.751
EEPFFPPPEEFVFIHAVPVEER	Q1KMD3;H3BQZ7	Q1KMD3	HNRNPUL2;HNRNPUL2-BSCL2	-4.96	8.87e-06	0.751
AIFDLEGWQFSHAFQITPSVAK	P49638	P49638	TTPA	-3.64	8.87e-06	0.751
EILFSVDSSINQSIGGVILFHETLYQK	P05062;A0A3B3IS80	P05062	ALDOB	-7.51	8.88e-06	0.751
EHLLSYLEK	Q9NYL9	Q9NYL9	TMOD3	-5.07	8.91e-06	0.751
LHGGTPANFLDVGGGATVHQVTEAFK	A0A2R8YDQ9;Q9P2R7;A0A2R8Y6Y7;Q5T9Q5	A0A2R8YDQ9	SUCLA2	-4.39	8.95e-06	0.751
HVLGVPLDDR	P11168;A0A0C4DH64	P11168	SLC2A2	-6.58	8.96e-06	0.752
VCSTLLGLEEHLNALDR	Q3LXA3;H0YCY6;I3L252	Q3LXA3	DAK;TKFC	-8.39	8.97e-06	0.752
IVFVPGCSIPLTIVK	P54136	P54136	RARS	-5.7	8.99e-06	0.752
LASGEHIAAFCLTEPASGSDAASIR	Q9H845;A0A7P0T8U3;A0A7P0T871;Q9H9W4;A0A7P0T7Z1;A0A7P0TB58;A0A7P0T9N9;A0A7P0TB68;A0A7P0Z450	Q9H845	ACAD9	-4.31	9.04e-06	0.752
NLFFSTNIDDAIK	O60701;E7ETF4;E7EV97;E7ER83;E7ER95	O60701	UGDH	-5.92	9.07e-06	0.752
ILGGVISAISEAAAQYNPEPPPPR	A0A0C4DGQ5;P04632;K7ELJ7;K7EIV0;A0A075B7C0;K7EM73	A0A0C4DGQ5	CAPNS1	-4.39	9.08e-06	0.752
ASIAGHMFDVVVIGGGISGLSAAK	P21397;A0A8I5KUC3	P21397	MAOA	-5.39	9.08e-06	0.752
LDSVIEFSIPDSLLIR	F8W1A4;P54819;F8VY04;A0A5K1VW67;F8VZG5;A0A5F9ZHP2	F8W1A4	AK2	-5.64	9.11e-06	0.753
GLPWSCSADEVQR	P31943;G8JLB6;E9PCY7;D6RBM0;D6RIU0;D6RFM3;D6RIT2;E7EN40;E5RGV0;D6R9T0;D6RDU3;D6RJ04;D6RIH9;E7EQJ0;D6RDL0;D6RF17;D6R9D3;D6RAM1	P31943	HNRNPH1	-4.33	9.11e-06	0.753
NLQNNAEWVYQGAIR	P04114	P04114	APOB	-4.17	9.14e-06	0.753
LSLAPDDSLLVLAGTSYAWER	P46952	P46952	HAAO	-5.05	9.14e-06	0.753
GIELTLQIQSDTGVR	P34896	P34896	SHMT1	-5.21	9.19e-06	0.753
AFELMHSGK	P11766	P11766	ADH5	-4.83	9.21e-06	0.753
ITNSLTVLCSEK	O75822;H0YLP3;H0YGJ7	O75822	EIF3J	-3.93	9.21e-06	0.753
ACALSIEESCRPGDK	P31040;D6RFM5;H0Y8X1	P31040	SDHA	-5.55	9.24e-06	0.754
VSGVECMIIANDATVK	A0A804HHS4;A0A804HJW5;D6RDF7;A0A804HIH3;A0A0S2Z5R4;A0A0D9SFE9;D6R9R1;A0A804HJW2;A0A0G2JM88;A0A804HJ24;Q9HCC0;A0A804HJ84;A0A804HLJ9;A0A804HKE8	A0A804HJ24	MCCC2	-4.9	9.25e-06	0.754
YGLAATVWSSNVGR	Q9H2A2;H0YF40	Q9H2A2	ALDH8A1	-6.47	9.28e-06	0.754
DVPLGTPLCIIVEK	A0A7P0TBE2;P10515;A0A7P0Z4G4;A0A7P0TAG1;A0A7P0T997;A0A7P0TAX2;H0YDD4;A0A7P0TBK2;A0A7P0TA47	A0A7P0TBE2	DLAT	-5.29	9.33e-06	0.754
FWHFGGNER	Q6IB77	Q6IB77	GLYAT	-7.05	9.34e-06	0.754
TTIPEEEEEEEEAAGVVVEEELFHQQGTPR	P20700	P20700	LMNB1	-4.05	9.34e-06	0.754
NSETFPTILEEAK	O60610;H7C2W8	O60610	DIAPH1	-4.79	9.38e-06	0.755
EAETGKPVTLK	A0A499FJM4;P08684;A0A494C0W7;P24462;A0A087WV96	A0A499FJM4	CYP3A4;CYP3A7	-6.79	9.39e-06	0.755
NDSFTTCIELGK	A0A087WUZ3;Q01082	Q01082	SPTBN1	-4.79	9.4e-06	0.755
VILGAHQEVNLEPHVQEIEVSR	P00747	P00747	PLG	-5.73	9.41e-06	0.755
NFLLLSYEELK	Q06520	Q06520	SULT2A1	-5.57	9.44e-06	0.755
NSQSYIQAISDLNNLVFSR	Q02928;A0A0C4DFV7	Q02928	CYP4A11	-6.1	9.45e-06	0.755
LPSPALWWVNGK	Q08AH3;E7EPS5;I3L2Y5;I3L438;Q68CK6;H3BNJ9;H3BM61;H3BQ84	Q68CK6	ACSM2A;ACSM2B	-5.19	9.47e-06	0.755
IEELSVVNHAYNGLTLGAGLSLAQVK	Q06278	Q06278	AOX1	-6.4	9.54e-06	0.756
IGPSEVENALMK	Q68CK6;H3BTX9	Q68CK6	ACSM2B	-5.32	9.56e-06	0.756
LASDLLEWIR	F5GXS2;H7C144;O43707;A0A804HII9;A0A804HK61;A0A7I2V4Y4;A0A804HLF4;A0A804HL31;G3V2W4;P12814	O43707	ACTN4;ACTN1	-6.52	9.59e-06	0.756
LGPNYLHIPVNCPYR	P04040	P04040	CAT	-7.45	9.63e-06	0.756
LVEEGIVSPSDLDLVMSEGLGMR	Q9Y2S2;A0A2R8Y4K2;A0A2R8YCZ4	Q9Y2S2	CRYL1	-5.25	9.66e-06	0.757
TANQASDTFSGIGK	Q15847	Q15847	ADIRF	-4.93	9.69e-06	0.757
ISNTAISISDHTALAQFCK	P22102;F8WD69;C9JBJ1;C9JTV6;C9JZG2;C9JKQ7	P22102	GART	-4.85	9.7e-06	0.757
TFVQEDIYDEFVER	P05091;S4R3S4	P05091	ALDH2	-4.68	9.73e-06	0.757
REPWLLPSQHNDIIR	E9PKU7;Q14697;F5H6X6	Q14697	GANAB	-6.1	9.8e-06	0.758
FGYTVSEENYMCR	Q96EK6;G3V5E4	Q96EK6	GNPNAT1	-5.27	9.87e-06	0.758
NNPSTNYTTLPDEIMNQK	P49888;H0Y8G0	P49888	SULT1E1	-4.08	9.87e-06	0.758
TVFAEHISDECK	P39023;G5E9G0;H7C422;B5MCW2;H7C3M2;F8WCR1	P39023	RPL3	-6.6	9.88e-06	0.758
GPPPPPGDENR	Q13435;E9PPJ0;H0YCG1;E9PJ04;E9PJT3	Q13435	SF3B2	-3.86	9.89e-06	0.758
VGNPLDR	O75891	O75891	ALDH1L1	-5.27	9.94e-06	0.758
YTEFYHVPTHSDASK	Q96HC4;H0YBI4	Q96HC4	PDLIM5	-6.8	9.94e-06	0.759
SCVITYLAQVDPK	F5H1Z6;H0YFF3;H0YGA9;H0YH17;H0YGN8;Q9Y365;F5H8H3;F5GY11	F5H1Z6	STARD10	-4.87	9.98e-06	0.759
SIGPLTFVFTGTGNVSK	Q9UDR5;F8WAH1;F8WE53;A0A7P0T9N4;A0A7P0T834	Q9UDR5	AASS	-4.99	1.01e-05	0.759
SIFTVCLDATMPR	A0A7P0TAR1;P43155;A0A7P0T9R9;A0A7P0T9E7;H0Y4Z7;A0A7P0TBF3	A0A7P0TAR1	CRAT	-4.36	1.01e-05	0.76
DNIDPYIYTPFGSGPR	A0A499FJM4;P08684;A0A494C0W7;E7EVM8;P24462;A0A087WV96	A0A499FJM4	CYP3A4;CYP3A7	-6.58	1.01e-05	0.76
HGVSCVSLWPGIVQTELLK	Q96LJ7	Q96LJ7	DHRS1	-5.09	1.01e-05	0.759
KQDPPVTHDLR	P25685;M0QXK0;A0A7I2V3K7;M0R080;M0QYT3;M0R1D6;M0QZD0;M0R128;A0A1B0GX60	P25685	DNAJB1	-4.05	1.01e-05	0.759
VVTPLSPPTNLHLEANPDTGVLTVSWER	P02751	P02751	FN1	-5.27	1.01e-05	0.759
ISIVEPGYFR	O14756	O14756	HSD17B6	-6.55	1.01e-05	0.76
EAEAAVYHR	P30613	P30613	PKLR	-6.8	1.02e-05	0.76
YMNGHSDVVMGLVSVNCESLHNR	P32929	P32929	CTH	-5.51	1.03e-05	0.761
WETPYMHALAAAASSK	Q14353	Q14353	GAMT	-6.6	1.03e-05	0.761
NCVILPHIGSATHR	Q9UBQ7	Q9UBQ7	GRHPR	-6.07	1.03e-05	0.761
[truncated: 4,432 more rows]
